# Supplementary material for: Gd3+-Doped Magnetic Nanoparticles for Biomedical Applications
Source: Hindawi journal article supplement (doi:10.1155/2018/1412563), 2018-08-02
Supplement: f1 [file 1412563.f1.zip]

Archive with 6 entries (6 files):
- MNP-Gd0.5.xye
- MNP-Gd0.6.xye
- MNP-Gd0.xy
- MNP-Gd2.5.xye
- MNP-Gd4.3.xye
- MNP-Gd5.1.xye
