# Supplementary material for: Gd3+-Doped Magnetic Nanoparticles for Biomedical Applications
Source: Hindawi journal article supplement (doi:10.1155/2018/1412563), 2018-08-02
Supplement: f1 [file 1412563.f1.zip › MNP-Gd0.5.xye]

'Id: "" Comment: "" Operator: "Lab Manager" Anode: "Cu" Scantype: "Coupled TwoTheta/Theta" TimePerStep: "18.8" 
4.99751234054565 2.76595755905628 0.383569300189794
5.01773595623672 3.67021291490161 0.441841712766838
5.03795957192779 4.20212783010474 0.472776317979537
5.05818318761885 2.92553203361722 0.394478658939308
5.07840680330992 3.6170214233813 0.438628275844795
5.09863041900098 4.20212783010474 0.472776317979537
5.11885403469205 3.35106396577973 0.422194375282049
5.13907765038311 3.67021291490161 0.441841712766838
5.15930126607418 3.19148949121879 0.412019521636212
5.17952488176525 3.77659589794223 0.448199474208799
5.19974849745631 3.93617037250317 0.457570511496874
5.21997211314738 3.67021291490161 0.441841712766838
5.24019572883844 3.2446809827391 0.415438829407517
5.26041934452951 3.72340440642192 0.445031947067723
5.28064296022058 3.6170214233813 0.438628275844795
5.30086657591164 3.45744694882036 0.428843514653201
5.32109019160271 3.45744694882036 0.428843514653201
5.34131380729377 3.51063844034067 0.432129719910892
5.36153742298484 4.36170230466568 0.481669441788406
5.3817610386759 2.97872352513754 0.398048674321006
5.40198465436697 3.77659589794223 0.448199474208799
5.42220827005804 3.51063844034067 0.432129719910892
5.4424318857491 4.73404274530787 0.501807527388583
5.46265550144017 2.87234054209691 0.390876038647036
5.48287911713123 4.89361721986881 0.510194863610278
5.5031027328223 4.20212783010474 0.472776317979537
5.52332634851336 3.56382993186098 0.435391122555825
5.54354996420443 3.35106396577973 0.422194375282049
5.5637735798955 3.82978738946255 0.451344772265282
5.58399719558656 3.35106396577973 0.422194375282049
5.60422081127763 3.98936186402349 0.460651829217758
5.62444442696869 3.93617037250317 0.457570511496874
5.64466804265976 4.68085125378756 0.498980420230782
5.66489165835083 3.77659589794223 0.448199474208799
5.68511527404189 3.93617037250317 0.457570511496874
5.70533888973296 3.77659589794223 0.448199474208799
5.72556250542402 3.72340440642192 0.445031947067723
5.74578612111509 4.36170230466568 0.481669441788406
5.76600973680615 2.97872352513754 0.398048674321006
5.78623335249722 4.62765976226725 0.49613720380912
5.80645696818829 4.20212783010474 0.472776317979537
5.82668058387935 4.94680871138912 0.512960167678218
5.84690419957042 3.56382993186098 0.435391122555825
5.86712781526148 3.51063844034067 0.432129719910892
5.88735143095255 5.00000020290944 0.515710644057907
5.90757504664361 3.88297888098286 0.454468302768581
5.92779866233468 3.29787247425942 0.418830223061378
5.94802227802575 4.20212783010474 0.472776317979537
5.96824589371681 4.09574484706411 0.466753443803018
5.98846950940788 4.57446827074693 0.493277599565779
6.00869312509894 4.52127677922662 0.490401320821245
6.02891674079001 4.73404274530787 0.501807527388583
6.04914035648108 4.68085125378756 0.498980420230782
6.06936397217214 4.36170230466568 0.481669441788406
6.08958758786321 3.72340440642192 0.445031947067723
6.10981120355427 5.47872362659226 0.539834679625181
6.13003481924534 4.14893633858443 0.469774533230711
6.1502584349364 4.89361721986881 0.510194863610278
6.17048205062747 4.0425533555438 0.463712672386492
6.19070566631854 3.88297888098286 0.454468302768581
6.2109292820096 3.88297888098286 0.454468302768581
6.23115289770067 4.41489379618599 0.48459755047143
6.25137651339173 4.09574484706411 0.466753443803018
6.2716001290828 4.41489379618599 0.48459755047143
6.29182374477386 5.31914915203132 0.531914915203132
6.31204736046493 4.89361721986881 0.510194863610278
6.332270976156 4.52127677922662 0.490401320821245
6.35249459184706 4.62765976226725 0.49613720380912
6.37271820753813 5.10638318595006 0.521168051529382
6.39294182322919 4.78723423682818 0.504618796037166
6.41316543892026 4.09574484706411 0.466753443803018
6.43338905461133 4.41489379618599 0.48459755047143
6.45361267030239 5.37234064355163 0.534567873881054
6.47383628599346 6.01063854179539 0.565433310857768
6.49405990168452 5.90425555875476 0.560407137255822
6.51428351737559 4.41489379618599 0.48459755047143
6.53450713306665 5.15957467747038 0.523875436249008
6.55473074875772 5.265957660511 0.529248658236749
6.57495436444879 4.0425533555438 0.463712672386492
6.59517798013985 4.94680871138912 0.512960167678218
6.61540159583092 4.52127677922662 0.490401320821245
6.63562521152198 3.51063844034067 0.432129719910892
6.65584882721305 5.21276616899069 0.526568900976162
6.67607244290411 5.42553213507194 0.537207731288247
6.69629605859518 4.89361721986881 0.510194863610278
6.71651967428625 5.79787257571413 0.555335475138186
6.73674328997731 5.90425555875476 0.560407137255822
6.75696690566838 5.90425555875476 0.560407137255822
6.77719052135944 5.15957467747038 0.523875436249008
6.79741413705051 6.54255345699852 0.5899221785364
6.81763775274158 4.89361721986881 0.510194863610278
6.83786136843264 5.15957467747038 0.523875436249008
6.85808498412371 5.79787257571413 0.555335475138186
6.87830859981477 4.89361721986881 0.510194863610278
6.89853221550584 5.79787257571413 0.555335475138186
6.9187558311969 6.91489389764071 0.606476314558303
6.93897944688797 6.17021301635633 0.572889896348368
6.95920306257904 6.01063854179539 0.565433310857768
6.9794266782701 6.32978749091727 0.580250667943183
6.99965029396117 5.42553213507194 0.537207731288247
7.01987390965223 5.6382981011532 0.547639923340591
7.0400975253433 6.22340450787664 0.575353950284691
7.06032114103436 4.73404274530787 0.501807527388583
7.08054475672543 5.00000020290944 0.515710644057907
7.1007683724165 5.53191511811257 0.542448906438364
7.12099198810756 6.27659599939695 0.5778074963847
7.14121560379863 5.90425555875476 0.560407137255822
7.16143921948969 6.01063854179539 0.565433310857768
7.18166283518076 6.54255345699852 0.5899221785364
7.20188645087183 5.74468108419382 0.552782195061309
7.22211006656289 6.48936196547821 0.587519226884514
7.24233368225396 6.0638300333157 0.567929717304644
7.26255729794502 6.32978749091727 0.580250667943183
7.28278091363609 6.96808538916102 0.608804447167049
7.30300452932715 6.0638300333157 0.567929717304644
7.32322814501822 7.12765986372196 0.615736030455294
7.34345176070929 5.90425555875476 0.560407137255822
7.36367537640035 6.8617024061204 0.604139210240542
7.38389899209142 6.70212793155946 0.59707301148151
7.40412260778248 6.11702152483601 0.570415198401908
7.42434622347355 6.48936196547821 0.587519226884514
7.44456983916461 7.71276627044541 0.640510375928879
7.46479345485568 8.03191521956729 0.653627990751228
7.48501707054675 5.90425555875476 0.560407137255822
7.50524068623781 8.29787267716885 0.664361516152362
7.52546430192888 6.27659599939695 0.5778074963847
7.54568791761994 6.80851091460008 0.601793029687043
7.56591153331101 7.12765986372196 0.615736030455294
7.58613514900208 8.19148969412823 0.660089050510576
7.60635876469314 7.44680881284384 0.629370215232479
7.62658238038421 7.12765986372196 0.615736030455294
7.64680599607527 7.71276627044541 0.640510375928879
7.66702961176634 6.64893644003915 0.594698954320119
7.6872532274574 7.2872343382829 0.622590446048853
7.70747684314847 6.32978749091727 0.580250667943183
7.72770045883954 7.23404284676259 0.620314056540036
7.7479240745306 7.07446837220165 0.613434205461912
7.76814769022167 7.71276627044541 0.640510375928879
7.78837130591273 8.35106416868917 0.666487478437833
7.8085949216038 7.87234074500635 0.647102423100873
7.82881853729486 6.8617024061204 0.604139210240542
7.84904215298593 8.03191521956729 0.653627990751228
7.869265768677 8.35106416868917 0.666487478437833
7.88948938436806 7.34042582980322 0.624858542617019
7.90971300005913 6.17021301635633 0.572889896348368
7.92993661575019 9.09574504997355 0.695569008579737
7.95016023144126 7.60638328740478 0.636077724914372
7.97038384713233 8.82978759237199 0.685324428169477
7.99060746282339 8.24468118564854 0.662228728895168
8.01083107851446 7.34042582980322 0.624858542617019
8.03105469420552 8.82978759237199 0.685324428169477
8.05127830989659 7.97872372804697 0.651460064411727
8.07150192558765 8.93617057541261 0.68944052780942
8.09172554127872 7.97872372804697 0.651460064411727
8.11194915696979 9.73404294821731 0.71956115997076
8.13217277266085 9.62765996517668 0.715618329417402
8.15239638835192 8.61702162629073 0.677017158397923
8.17262000404298 9.25531952453449 0.701643962424722
8.19284361973405 7.76595776196572 0.64271523744401
8.21306723542511 8.51063864325011 0.672825061382888
8.23329085111618 8.67021311781104 0.679103502814817
8.25351446680725 8.72340460933136 0.681183457157842
8.27373808249831 8.13829820260791 0.657942413767192
8.29396169818938 8.0851067110876 0.655788750333248
8.31418531388044 8.45744715172979 0.670719187480671
8.33440892957151 8.35106416868917 0.666487478437833
8.35463254526258 8.56383013477042 0.674924364647657
8.37485616095364 8.61702162629073 0.677017158397923
8.39507977664471 9.04255355845324 0.693532198911084
8.41530339233577 8.93617057541261 0.68944052780942
8.43552700802684 8.72340460933136 0.681183457157842
8.4557506237179 7.92553223652666 0.64928489952653
8.47597423940897 9.25531952453449 0.701643962424722
8.49619785510004 9.680851456697 0.717592452697427
8.5164214707911 8.93617057541261 0.68944052780942
8.53664508648217 8.29787267716885 0.664361516152362
8.55686870217323 8.77659610085167 0.683257079784517
8.5770923178643 8.82978759237199 0.685324428169477
8.59731593355536 9.36170250757512 0.705664877648999
8.61753954924643 9.36170250757512 0.705664877648999
8.6377631649375 8.29787267716885 0.664361516152362
8.65798678062856 9.73404294821731 0.71956115997076
8.67821039631963 9.14893654149386 0.697599871320769
8.69843401201069 9.680851456697 0.717592452697427
8.71865762770176 8.0851067110876 0.655788750333248
8.73888124339283 8.19148969412823 0.660089050510576
8.75910485908389 11.382979185347 0.778124437871789
8.77932847477496 7.92553223652666 0.64928489952653
8.79955209046602 10.0000004058189 0.729324987086856
8.81977570615709 10.6914897955829 0.754119545431137
8.83999932184815 8.82978759237199 0.685324428169477
8.86022293753922 10.9574472531845 0.763441525365265
8.88044655323029 11.1702132192658 0.770817943312599
8.90067016892135 8.61702162629073 0.677017158397923
8.92089378461242 10.1063833888595 0.73319411231239
8.94111740030348 8.19148969412823 0.660089050510576
8.96134101599455 9.57446847365637 0.713638745184143
8.98156463168561 8.51063864325011 0.672825061382888
9.00178824737668 10.2127663719001 0.737042926748412
9.02201186306775 8.82978759237199 0.685324428169477
9.04223547875881 9.25531952453449 0.701643962424722
9.06245909444988 9.84042593125793 0.723482503229191
9.08268271014094 9.94680891429856 0.727382706708846
9.10290632583201 10.0000004058189 0.729324987086856
9.12312994152308 9.09574504997355 0.695569008579737
9.14335355721414 8.29787267716885 0.664361516152362
9.16357717290521 9.94680891429856 0.727382706708846
9.18380078859627 9.3085110160548 0.703657292136748
9.20402440428734 9.09574504997355 0.695569008579737
9.2242480199784 9.36170250757512 0.705664877648999
9.24447163566947 8.77659610085167 0.683257079784517
9.26469525136054 9.25531952453449 0.701643962424722
9.2849188670516 9.20212803301418 0.699624838922197
9.30514248274267 10.4255323379814 0.744680881284384
9.32536609843373 9.680851456697 0.717592452697427
9.3455897141248 8.77659610085167 0.683257079784517
9.36581332981586 9.20212803301418 0.699624838922197
9.38603694550693 8.98936206693292 0.691489389764071
9.406260561198 9.04255355845324 0.693532198911084
9.42648417688906 10.5851068125423 0.750358327241694
9.44670779258013 8.45744715172979 0.670719187480671
9.46693140827119 10.2127663719001 0.737042926748412
9.48715502396226 10.0531918973392 0.73126210865831
9.50737863965333 9.36170250757512 0.705664877648999
9.52760225534439 9.52127698213606 0.711653654425974
9.54782587103546 8.03191521956729 0.653627990751228
9.56804948672652 8.8829790838923 0.687385558923066
9.58827310241759 9.3085110160548 0.703657292136748
9.60849671810865 9.20212803301418 0.699624838922197
9.62872033379972 10.7446812871033 0.755993137251537
9.64894394949079 8.93617057541261 0.68944052780942
9.66916756518185 9.52127698213606 0.711653654425974
9.68939118087292 9.14893654149386 0.697599871320769
9.70961479656398 8.24468118564854 0.662228728895168
9.72983841225505 9.94680891429856 0.727382706708846
9.75006202794611 9.57446847365637 0.713638745184143
9.77028564363718 9.62765996517668 0.715618329417402
9.79050925932825 9.20212803301418 0.699624838922197
9.81073287501931 9.46808549061574 0.709663010933843
9.83095649071038 9.78723443973762 0.721524495570747
9.85118010640144 9.36170250757512 0.705664877648999
9.87140372209251 7.92553223652666 0.64928489952653
9.89162733778358 7.97872372804697 0.651460064411727
9.91185095347464 8.8829790838923 0.687385558923066
9.93207456916571 8.0851067110876 0.655788750333248
9.95229818485677 8.72340460933136 0.681183457157842
9.97252180054784 8.56383013477042 0.674924364647657
9.9927454162389 8.56383013477042 0.674924364647657
10.01296903193 7.39361732132353 0.62711843622367
10.033192647621 8.45744715172979 0.670719187480671
10.0534162633121 8.51063864325011 0.672825061382888
10.0736398790032 11.5957451514283 0.785362960607329
10.0938634946942 9.73404294821731 0.71956115997076
10.1140871103853 9.09574504997355 0.695569008579737
10.1343107260764 9.41489399909543 0.707666767848775
10.1545343417674 9.41489399909543 0.707666767848775
10.1747579574585 10.1063833888595 0.73319411231239
10.1949815731496 8.72340460933136 0.681183457157842
10.2152051888406 10.0000004058189 0.729324987086856
10.2354288045317 9.3085110160548 0.703657292136748
10.2556524202228 10.0531918973392 0.73126210865831
10.2758760359138 9.36170250757512 0.705664877648999
10.2960996516049 8.67021311781104 0.679103502814817
10.316323267296 8.72340460933136 0.681183457157842
10.336546882987 10.6914897955829 0.754119545431137
10.3567704986781 8.45744715172979 0.670719187480671
10.3769941143692 9.94680891429856 0.727382706708846
10.3972177300602 9.25531952453449 0.701643962424722
10.4174413457513 8.03191521956729 0.653627990751228
10.4376649614424 8.03191521956729 0.653627990751228
10.4578885771334 8.35106416868917 0.666487478437833
10.4781121928245 9.84042593125793 0.723482503229191
10.4983358085155 9.41489399909543 0.707666767848775
10.5185594242066 7.6595747789251 0.638297898243758
10.5387830398977 10.1063833888595 0.73319411231239
10.5590066555887 8.72340460933136 0.681183457157842
10.5792302712798 7.60638328740478 0.636077724914372
10.5994538869709 10.0531918973392 0.73126210865831
10.6196775026619 9.36170250757512 0.705664877648999
10.639901118353 9.41489399909543 0.707666767848775
10.6601247340441 8.35106416868917 0.666487478437833
10.6803483497351 8.72340460933136 0.681183457157842
10.7005719654262 9.41489399909543 0.707666767848775
10.7207955811173 9.52127698213606 0.711653654425974
10.7410191968083 8.72340460933136 0.681183457157842
10.7612428124994 8.40425566020948 0.668606680855476
10.7814664281905 9.20212803301418 0.699624838922197
10.8016900438815 8.67021311781104 0.679103502814817
10.8219136595726 9.25531952453449 0.701643962424722
10.8421372752637 9.20212803301418 0.699624838922197
10.8623608909547 9.84042593125793 0.723482503229191
10.8825845066458 10.2127663719001 0.737042926748412
10.9028081223369 9.04255355845324 0.693532198911084
10.9230317380279 8.45744715172979 0.670719187480671
10.943255353719 9.09574504997355 0.695569008579737
10.9634789694101 7.81914925348604 0.64491256090486
10.9837025851011 8.93617057541261 0.68944052780942
11.0039262007922 8.61702162629073 0.677017158397923
11.0241498164833 9.20212803301418 0.699624838922197
11.0443734321743 9.52127698213606 0.711653654425974
11.0645970478654 9.73404294821731 0.71956115997076
11.0848206635565 9.680851456697 0.717592452697427
11.1050442792475 9.09574504997355 0.695569008579737
11.1252678949386 9.14893654149386 0.697599871320769
11.1454915106297 8.45744715172979 0.670719187480671
11.1657151263207 7.18085135524228 0.618029282454318
11.1859387420118 8.13829820260791 0.657942413767192
11.2061623577029 7.92553223652666 0.64928489952653
11.2263859733939 9.84042593125793 0.723482503229191
11.246609589085 9.14893654149386 0.697599871320769
11.266833204776 8.93617057541261 0.68944052780942
11.2870568204671 7.76595776196572 0.64271523744401
11.3072804361582 9.20212803301418 0.699624838922197
11.3275040518492 8.82978759237199 0.685324428169477
11.3477276675403 8.40425566020948 0.668606680855476
11.3679512832314 8.98936206693292 0.691489389764071
11.3881748989224 9.09574504997355 0.695569008579737
11.4083985146135 8.67021311781104 0.679103502814817
11.4286221303046 8.0851067110876 0.655788750333248
11.4488457459956 8.72340460933136 0.681183457157842
11.4690693616867 10.3191493549408 0.740871746937468
11.4892929773778 9.36170250757512 0.705664877648999
11.5095165930688 8.72340460933136 0.681183457157842
11.5297402087599 9.94680891429856 0.727382706708846
11.549963824451 9.20212803301418 0.699624838922197
11.570187440142 8.67021311781104 0.679103502814817
11.5904110558331 7.92553223652666 0.64928489952653
11.6106346715242 8.82978759237199 0.685324428169477
11.6308582872152 8.61702162629073 0.677017158397923
11.6510819029063 9.20212803301418 0.699624838922197
11.6713055185974 8.45744715172979 0.670719187480671
11.6915291342884 8.45744715172979 0.670719187480671
11.7117527499795 8.13829820260791 0.657942413767192
11.7319763656706 8.82978759237199 0.685324428169477
11.7521999813616 7.92553223652666 0.64928489952653
11.7724235970527 9.20212803301418 0.699624838922197
11.7926472127438 10.5851068125423 0.750358327241694
11.8128708284348 8.40425566020948 0.668606680855476
11.8330944441259 9.89361742277825 0.725435226087713
11.853318059817 8.67021311781104 0.679103502814817
11.873541675508 8.0851067110876 0.655788750333248
11.8937652911991 8.13829820260791 0.657942413767192
11.9139889068902 9.73404294821731 0.71956115997076
11.9342125225812 8.03191521956729 0.653627990751228
11.9544361382723 9.78723443973762 0.721524495570747
11.9746597539634 8.40425566020948 0.668606680855476
11.9948833696544 9.04255355845324 0.693532198911084
12.0151069853455 7.87234074500635 0.647102423100873
12.0353306010365 9.14893654149386 0.697599871320769
12.0555542167276 8.51063864325011 0.672825061382888
12.0757778324187 8.51063864325011 0.672825061382888
12.0960014481097 8.03191521956729 0.653627990751228
12.1162250638008 10.2127663719001 0.737042926748412
12.1364486794919 8.35106416868917 0.666487478437833
12.1566722951829 9.36170250757512 0.705664877648999
12.176895910874 8.98936206693292 0.691489389764071
12.1971195265651 8.35106416868917 0.666487478437833
12.2173431422561 8.61702162629073 0.677017158397923
12.2375667579472 8.19148969412823 0.660089050510576
12.2577903736383 8.56383013477042 0.674924364647657
12.2780139893293 7.07446837220165 0.613434205461912
12.2982376050204 8.67021311781104 0.679103502814817
12.3184612207115 9.25531952453449 0.701643962424722
12.3386848364025 10.3191493549408 0.740871746937468
12.3589084520936 6.8617024061204 0.604139210240542
12.3791320677847 10.2127663719001 0.737042926748412
12.3993556834757 9.3085110160548 0.703657292136748
12.4195792991668 9.36170250757512 0.705664877648999
12.4398029148579 8.40425566020948 0.668606680855476
12.4600265305489 10.1595748803798 0.735121038400963
12.48025014624 8.98936206693292 0.691489389764071
12.5004737619311 7.44680881284384 0.629370215232479
12.5206973776221 9.41489399909543 0.707666767848775
12.5409209933132 9.84042593125793 0.723482503229191
12.5611446090043 9.25531952453449 0.701643962424722
12.5813682246953 9.84042593125793 0.723482503229191
12.6015918403864 8.13829820260791 0.657942413767192
12.6218154560775 8.29787267716885 0.664361516152362
12.6420390717685 8.77659610085167 0.683257079784517
12.6622626874596 9.20212803301418 0.699624838922197
12.6824863031507 9.89361742277825 0.725435226087713
12.7027099188417 8.35106416868917 0.666487478437833
12.7229335345328 9.84042593125793 0.723482503229191
12.7431571502239 8.19148969412823 0.660089050510576
12.7633807659149 7.76595776196572 0.64271523744401
12.783604381606 8.8829790838923 0.687385558923066
12.803827997297 10.1595748803798 0.735121038400963
12.8240516129881 7.6595747789251 0.638297898243758
12.8442752286792 9.3085110160548 0.703657292136748
12.8644988443702 10.3191493549408 0.740871746937468
12.8847224600613 8.61702162629073 0.677017158397923
12.9049460757524 8.8829790838923 0.687385558923066
12.9251696914434 8.0851067110876 0.655788750333248
12.9453933071345 9.89361742277825 0.725435226087713
12.9656169228256 9.14893654149386 0.697599871320769
12.9858405385166 8.77659610085167 0.683257079784517
13.0060641542077 8.40425566020948 0.668606680855476
13.0262877698988 8.56383013477042 0.674924364647657
13.0465113855898 9.36170250757512 0.705664877648999
13.0667350012809 8.8829790838923 0.687385558923066
13.086958616972 7.97872372804697 0.651460064411727
13.107182232663 7.55319179588447 0.633849775074574
13.1274058483541 9.04255355845324 0.693532198911084
13.1476294640452 7.55319179588447 0.633849775074574
13.1678530797362 8.8829790838923 0.687385558923066
13.1880766954273 7.34042582980322 0.624858542617019
13.2083003111184 10.1063833888595 0.73319411231239
13.2285239268094 7.34042582980322 0.624858542617019
13.2487475425005 9.41489399909543 0.707666767848775
13.2689711581916 7.87234074500635 0.647102423100873
13.2891947738826 7.76595776196572 0.64271523744401
13.3094183895737 9.52127698213606 0.711653654425974
13.3296420052648 7.55319179588447 0.633849775074574
13.3498656209558 8.13829820260791 0.657942413767192
13.3700892366469 8.77659610085167 0.683257079784517
13.390312852338 7.97872372804697 0.651460064411727
13.410536468029 9.20212803301418 0.699624838922197
13.4307600837201 7.87234074500635 0.647102423100873
13.4509836994112 8.13829820260791 0.657942413767192
13.4712073151022 9.3085110160548 0.703657292136748
13.4914309307933 9.52127698213606 0.711653654425974
13.5116545464844 8.82978759237199 0.685324428169477
13.5318781621754 7.92553223652666 0.64928489952653
13.5521017778665 9.78723443973762 0.721524495570747
13.5723253935575 8.93617057541261 0.68944052780942
13.5925490092486 7.07446837220165 0.613434205461912
13.6127726249397 8.13829820260791 0.657942413767192
13.6329962406307 8.13829820260791 0.657942413767192
13.6532198563218 8.82978759237199 0.685324428169477
13.6734434720129 8.72340460933136 0.681183457157842
13.6936670877039 9.41489399909543 0.707666767848775
13.713890703395 9.41489399909543 0.707666767848775
13.7341143190861 8.67021311781104 0.679103502814817
13.7543379347771 8.98936206693292 0.691489389764071
13.7745615504682 8.35106416868917 0.666487478437833
13.7947851661593 9.04255355845324 0.693532198911084
13.8150087818503 9.25531952453449 0.701643962424722
13.8352323975414 8.72340460933136 0.681183457157842
13.8554560132325 9.57446847365637 0.713638745184143
13.8756796289235 8.45744715172979 0.670719187480671
13.8959032446146 8.67021311781104 0.679103502814817
13.9161268603057 8.29787267716885 0.664361516152362
13.9363504759967 8.45744715172979 0.670719187480671
13.9565740916878 8.19148969412823 0.660089050510576
13.9767977073789 9.20212803301418 0.699624838922197
13.9970213230699 8.61702162629073 0.677017158397923
14.017244938761 10.1063833888595 0.73319411231239
14.0374685544521 7.92553223652666 0.64928489952653
14.0576921701431 9.3085110160548 0.703657292136748
14.0779157858342 7.50000030436416 0.631613966431975
14.0981394015253 9.09574504997355 0.695569008579737
14.1183630172163 8.56383013477042 0.674924364647657
14.1385866329074 8.29787267716885 0.664361516152362
14.1588102485985 9.20212803301418 0.699624838922197
14.1790338642895 8.67021311781104 0.679103502814817
14.1992574799806 7.50000030436416 0.631613966431975
14.2194810956717 9.57446847365637 0.713638745184143
14.2397047113627 10.531915321022 0.748470630346173
14.2599283270538 8.51063864325011 0.672825061382888
14.2801519427449 8.82978759237199 0.685324428169477
14.3003755584359 9.09574504997355 0.695569008579737
14.320599174127 8.13829820260791 0.657942413767192
14.340822789818 8.51063864325011 0.672825061382888
14.3610464055091 8.51063864325011 0.672825061382888
14.3812700212002 8.03191521956729 0.653627990751228
14.4014936368912 8.19148969412823 0.660089050510576
14.4217172525823 8.61702162629073 0.677017158397923
14.4419408682734 7.92553223652666 0.64928489952653
14.4621644839644 8.24468118564854 0.662228728895168
14.4823880996555 9.78723443973762 0.721524495570747
14.5026117153466 8.35106416868917 0.666487478437833
14.5228353310376 7.39361732132353 0.62711843622367
14.5430589467287 8.56383013477042 0.674924364647657
14.5632825624198 7.23404284676259 0.620314056540036
14.5835061781108 8.93617057541261 0.68944052780942
14.6037297938019 7.87234074500635 0.647102423100873
14.623953409493 10.0531918973392 0.73126210865831
14.644177025184 7.18085135524228 0.618029282454318
14.6644006408751 8.93617057541261 0.68944052780942
14.6846242565662 7.92553223652666 0.64928489952653
14.7048478722572 8.45744715172979 0.670719187480671
14.7250714879483 7.71276627044541 0.640510375928879
14.7452951036394 8.45744715172979 0.670719187480671
14.7655187193304 7.39361732132353 0.62711843622367
14.7857423350215 8.77659610085167 0.683257079784517
14.8059659507126 8.19148969412823 0.660089050510576
14.8261895664036 6.75531942307977 0.599437666325494
14.8464131820947 9.36170250757512 0.705664877648999
14.8666367977858 9.73404294821731 0.71956115997076
14.8868604134768 7.12765986372196 0.615736030455294
14.9070840291679 9.680851456697 0.717592452697427
14.927307644859 7.50000030436416 0.631613966431975
14.94753126055 8.45744715172979 0.670719187480671
14.9677548762411 7.71276627044541 0.640510375928879
14.9879784919322 8.61702162629073 0.677017158397923
15.0082021076232 9.09574504997355 0.695569008579737
15.0284257233143 8.72340460933136 0.681183457157842
15.0486493390054 7.92553223652666 0.64928489952653
15.0688729546964 8.56383013477042 0.674924364647657
15.0890965703875 9.20212803301418 0.699624838922197
15.1093201860785 8.19148969412823 0.660089050510576
15.1295438017696 9.57446847365637 0.713638745184143
15.1497674174607 8.03191521956729 0.653627990751228
15.1699910331517 8.40425566020948 0.668606680855476
15.1902146488428 8.35106416868917 0.666487478437833
15.2104382645339 8.03191521956729 0.653627990751228
15.2306618802249 8.19148969412823 0.660089050510576
15.250885495916 6.38297898243758 0.582683595460406
15.2711091116071 10.0531918973392 0.73126210865831
15.2913327272981 8.72340460933136 0.681183457157842
15.3115563429892 7.87234074500635 0.647102423100873
15.3317799586803 8.98936206693292 0.691489389764071
15.3520035743713 8.51063864325011 0.672825061382888
15.3722271900624 8.40425566020948 0.668606680855476
15.3924508057535 7.87234074500635 0.647102423100873
15.4126744214445 8.45744715172979 0.670719187480671
15.4328980371356 8.40425566020948 0.668606680855476
15.4531216528267 8.61702162629073 0.677017158397923
15.4733452685177 7.81914925348604 0.64491256090486
15.4935688842088 9.14893654149386 0.697599871320769
15.5137924998999 8.8829790838923 0.687385558923066
15.5340161155909 10.0531918973392 0.73126210865831
15.554239731282 8.67021311781104 0.679103502814817
15.5744633469731 7.50000030436416 0.631613966431975
15.5946869626641 8.13829820260791 0.657942413767192
15.6149105783552 9.36170250757512 0.705664877648999
15.6351341940463 9.14893654149386 0.697599871320769
15.6553578097373 8.93617057541261 0.68944052780942
15.6755814254284 9.09574504997355 0.695569008579737
15.6958050411195 8.03191521956729 0.653627990751228
15.7160286568105 8.82978759237199 0.685324428169477
15.7362522725016 7.97872372804697 0.651460064411727
15.7564758881927 9.04255355845324 0.693532198911084
15.7766995038837 9.14893654149386 0.697599871320769
15.7969231195748 8.98936206693292 0.691489389764071
15.8171467352659 9.57446847365637 0.713638745184143
15.8373703509569 9.09574504997355 0.695569008579737
15.857593966648 8.61702162629073 0.677017158397923
15.877817582339 8.72340460933136 0.681183457157842
15.8980411980301 8.61702162629073 0.677017158397923
15.9182648137212 8.72340460933136 0.681183457157842
15.9384884294122 7.71276627044541 0.640510375928879
15.9587120451033 9.14893654149386 0.697599871320769
15.9789356607944 8.77659610085167 0.683257079784517
15.9991592764854 8.19148969412823 0.660089050510576
16.0193828921765 9.73404294821731 0.71956115997076
16.0396065078676 7.55319179588447 0.633849775074574
16.0598301235586 8.8829790838923 0.687385558923066
16.0800537392497 8.82978759237199 0.685324428169477
16.1002773549408 7.92553223652666 0.64928489952653
16.1205009706318 8.45744715172979 0.670719187480671
16.1407245863229 8.40425566020948 0.668606680855476
16.160948202014 9.20212803301418 0.699624838922197
16.181171817705 8.35106416868917 0.666487478437833
16.2013954333961 8.03191521956729 0.653627990751228
16.2216190490872 8.24468118564854 0.662228728895168
16.2418426647782 7.12765986372196 0.615736030455294
16.2620662804693 7.44680881284384 0.629370215232479
16.2822898961604 8.40425566020948 0.668606680855476
16.3025135118514 7.87234074500635 0.647102423100873
16.3227371275425 8.93617057541261 0.68944052780942
16.3429607432336 7.55319179588447 0.633849775074574
16.3631843589246 8.51063864325011 0.672825061382888
16.3834079746157 8.35106416868917 0.666487478437833
16.4036315903068 8.19148969412823 0.660089050510576
16.4238552059978 8.29787267716885 0.664361516152362
16.4440788216889 8.40425566020948 0.668606680855476
16.46430243738 8.98936206693292 0.691489389764071
16.484526053071 8.72340460933136 0.681183457157842
16.5047496687621 7.97872372804697 0.651460064411727
16.5249732844532 8.0851067110876 0.655788750333248
16.5451969001442 8.56383013477042 0.674924364647657
16.5654205158353 8.03191521956729 0.653627990751228
16.5856441315264 8.35106416868917 0.666487478437833
16.6058677472174 8.72340460933136 0.681183457157842
16.6260913629085 7.97872372804697 0.651460064411727
16.6463149785995 9.25531952453449 0.701643962424722
16.6665385942906 8.98936206693292 0.691489389764071
16.6867622099817 8.67021311781104 0.679103502814817
16.7069858256727 8.35106416868917 0.666487478437833
16.7272094413638 8.19148969412823 0.660089050510576
16.7474330570549 8.29787267716885 0.664361516152362
16.7676566727459 8.8829790838923 0.687385558923066
16.787880288437 7.6595747789251 0.638297898243758
16.8081039041281 8.29787267716885 0.664361516152362
16.8283275198191 9.36170250757512 0.705664877648999
16.8485511355102 8.51063864325011 0.672825061382888
16.8687747512013 7.87234074500635 0.647102423100873
16.8889983668923 8.93617057541261 0.68944052780942
16.9092219825834 7.18085135524228 0.618029282454318
16.9294455982745 9.20212803301418 0.699624838922197
16.9496692139655 8.77659610085167 0.683257079784517
16.9698928296566 8.40425566020948 0.668606680855476
16.9901164453477 8.24468118564854 0.662228728895168
17.0103400610387 8.82978759237199 0.685324428169477
17.0305636767298 7.44680881284384 0.629370215232479
17.0507872924209 9.94680891429856 0.727382706708846
17.0710109081119 7.76595776196572 0.64271523744401
17.091234523803 8.93617057541261 0.68944052780942
17.1114581394941 8.93617057541261 0.68944052780942
17.1316817551851 8.61702162629073 0.677017158397923
17.1519053708762 9.14893654149386 0.697599871320769
17.1721289865673 9.57446847365637 0.713638745184143
17.1923526022583 7.71276627044541 0.640510375928879
17.2125762179494 10.2127663719001 0.737042926748412
17.2327998336405 8.19148969412823 0.660089050510576
17.2530234493315 8.98936206693292 0.691489389764071
17.2732470650226 8.40425566020948 0.668606680855476
17.2934706807137 7.34042582980322 0.624858542617019
17.3136942964047 8.61702162629073 0.677017158397923
17.3339179120958 8.93617057541261 0.68944052780942
17.3541415277869 8.13829820260791 0.657942413767192
17.3743651434779 8.35106416868917 0.666487478437833
17.394588759169 7.60638328740478 0.636077724914372
17.41481237486 7.39361732132353 0.62711843622367
17.4350359905511 8.03191521956729 0.653627990751228
17.4552596062422 8.77659610085167 0.683257079784517
17.4754832219332 8.45744715172979 0.670719187480671
17.4957068376243 7.34042582980322 0.624858542617019
17.5159304533154 8.24468118564854 0.662228728895168
17.5361540690064 7.87234074500635 0.647102423100873
17.5563776846975 8.56383013477042 0.674924364647657
17.5766013003886 8.67021311781104 0.679103502814817
17.5968249160796 8.61702162629073 0.677017158397923
17.6170485317707 7.34042582980322 0.624858542617019
17.6372721474618 8.72340460933136 0.681183457157842
17.6574957631528 7.97872372804697 0.651460064411727
17.6777193788439 7.71276627044541 0.640510375928879
17.697942994535 7.76595776196572 0.64271523744401
17.718166610226 8.77659610085167 0.683257079784517
17.7383902259171 8.56383013477042 0.674924364647657
17.7586138416082 8.40425566020948 0.668606680855476
17.7788374572992 7.76595776196572 0.64271523744401
17.7990610729903 8.56383013477042 0.674924364647657
17.8192846886814 8.77659610085167 0.683257079784517
17.8395083043724 8.13829820260791 0.657942413767192
17.8597319200635 8.29787267716885 0.664361516152362
17.8799555357546 9.52127698213606 0.711653654425974
17.9001791514456 8.8829790838923 0.687385558923066
17.9204027671367 9.73404294821731 0.71956115997076
17.9406263828278 10.7446812871033 0.755993137251537
17.9608499985188 8.67021311781104 0.679103502814817
17.9810736142099 10.2127663719001 0.737042926748412
18.001297229901 8.40425566020948 0.668606680855476
18.021520845592 8.24468118564854 0.662228728895168
18.0417444612831 9.62765996517668 0.715618329417402
18.0619680769742 9.20212803301418 0.699624838922197
18.0821916926652 9.41489399909543 0.707666767848775
18.1024153083563 9.20212803301418 0.699624838922197
18.1226389240474 8.72340460933136 0.681183457157842
18.1428625397384 8.29787267716885 0.664361516152362
18.1630861554295 8.67021311781104 0.679103502814817
18.1833097711205 7.55319179588447 0.633849775074574
18.2035333868116 8.56383013477042 0.674924364647657
18.2237570025027 8.93617057541261 0.68944052780942
18.2439806181937 8.40425566020948 0.668606680855476
18.2642042338848 9.14893654149386 0.697599871320769
18.2844278495759 8.24468118564854 0.662228728895168
18.3046514652669 8.8829790838923 0.687385558923066
18.324875080958 9.04255355845324 0.693532198911084
18.3450986966491 9.57446847365637 0.713638745184143
18.3653223123401 9.52127698213606 0.711653654425974
18.3855459280312 10.1063833888595 0.73319411231239
18.4057695437223 9.41489399909543 0.707666767848775
18.4259931594133 9.3085110160548 0.703657292136748
18.4462167751044 9.94680891429856 0.727382706708846
18.4664403907955 8.24468118564854 0.662228728895168
18.4866640064865 8.0851067110876 0.655788750333248
18.5068876221776 10.3191493549408 0.740871746937468
18.5271112378687 9.41489399909543 0.707666767848775
18.5473348535597 8.93617057541261 0.68944052780942
18.5675584692508 7.92553223652666 0.64928489952653
18.5877820849419 8.45744715172979 0.670719187480671
18.6080057006329 7.92553223652666 0.64928489952653
18.628229316324 7.55319179588447 0.633849775074574
18.6484529320151 7.60638328740478 0.636077724914372
18.6686765477061 8.8829790838923 0.687385558923066
18.6889001633972 8.35106416868917 0.666487478437833
18.7091237790883 8.40425566020948 0.668606680855476
18.7293473947793 7.97872372804697 0.651460064411727
18.7495710104704 8.82978759237199 0.685324428169477
18.7697946261615 8.8829790838923 0.687385558923066
18.7900182418525 7.2872343382829 0.622590446048853
18.8102418575436 8.56383013477042 0.674924364647657
18.8304654732347 8.61702162629073 0.677017158397923
18.8506890889257 9.3085110160548 0.703657292136748
18.8709127046168 10.0531918973392 0.73126210865831
18.8911363203079 8.67021311781104 0.679103502814817
18.9113599359989 8.03191521956729 0.653627990751228
18.93158355169 7.2872343382829 0.622590446048853
18.951807167381 8.72340460933136 0.681183457157842
18.9720307830721 7.81914925348604 0.64491256090486
18.9922543987632 9.25531952453449 0.701643962424722
19.0124780144542 8.82978759237199 0.685324428169477
19.0327016301453 7.92553223652666 0.64928489952653
19.0529252458364 7.44680881284384 0.629370215232479
19.0731488615274 7.81914925348604 0.64491256090486
19.0933724772185 9.04255355845324 0.693532198911084
19.1135960929096 9.04255355845324 0.693532198911084
19.1338197086006 8.56383013477042 0.674924364647657
19.1540433242917 7.71276627044541 0.640510375928879
19.1742669399828 7.71276627044541 0.640510375928879
19.1944905556738 8.72340460933136 0.681183457157842
19.2147141713649 6.96808538916102 0.608804447167049
19.234937787056 7.34042582980322 0.624858542617019
19.255161402747 7.92553223652666 0.64928489952653
19.2753850184381 9.25531952453449 0.701643962424722
19.2956086341292 8.93617057541261 0.68944052780942
19.3158322498202 8.51063864325011 0.672825061382888
19.3360558655113 7.07446837220165 0.613434205461912
19.3562794812024 8.93617057541261 0.68944052780942
19.3765030968934 8.29787267716885 0.664361516152362
19.3967267125845 8.93617057541261 0.68944052780942
19.4169503282756 8.13829820260791 0.657942413767192
19.4371739439666 8.35106416868917 0.666487478437833
19.4573975596577 8.45744715172979 0.670719187480671
19.4776211753488 8.19148969412823 0.660089050510576
19.4978447910398 8.56383013477042 0.674924364647657
19.5180684067309 8.93617057541261 0.68944052780942
19.538292022422 7.92553223652666 0.64928489952653
19.558515638113 8.82978759237199 0.685324428169477
19.5787392538041 7.6595747789251 0.638297898243758
19.5989628694952 7.71276627044541 0.640510375928879
19.6191864851862 7.07446837220165 0.613434205461912
19.6394101008773 7.44680881284384 0.629370215232479
19.6596337165684 7.6595747789251 0.638297898243758
19.6798573322594 8.56383013477042 0.674924364647657
19.7000809479505 7.39361732132353 0.62711843622367
19.7203045636415 8.13829820260791 0.657942413767192
19.7405281793326 8.56383013477042 0.674924364647657
19.7607517950237 8.13829820260791 0.657942413767192
19.7809754107147 7.76595776196572 0.64271523744401
19.8011990264058 9.36170250757512 0.705664877648999
19.8214226420969 7.87234074500635 0.647102423100873
19.8416462577879 8.56383013477042 0.674924364647657
19.861869873479 8.40425566020948 0.668606680855476
19.8820934891701 7.55319179588447 0.633849775074574
19.9023171048611 8.45744715172979 0.670719187480671
19.9225407205522 8.77659610085167 0.683257079784517
19.9427643362433 7.87234074500635 0.647102423100873
19.9629879519343 7.76595776196572 0.64271523744401
19.9832115676254 7.34042582980322 0.624858542617019
20.0034351833165 8.40425566020948 0.668606680855476
20.0236587990075 9.04255355845324 0.693532198911084
20.0438824146986 7.87234074500635 0.647102423100873
20.0641060303897 8.24468118564854 0.662228728895168
20.0843296460807 6.75531942307977 0.599437666325494
20.1045532617718 9.41489399909543 0.707666767848775
20.1247768774629 7.02127688068134 0.611123710602471
20.1450004931539 7.23404284676259 0.620314056540036
20.165224108845 7.92553223652666 0.64928489952653
20.1854477245361 7.71276627044541 0.640510375928879
20.2056713402271 7.71276627044541 0.640510375928879
20.2258949559182 9.84042593125793 0.723482503229191
20.2461185716093 7.02127688068134 0.611123710602471
20.2663421873003 9.46808549061574 0.709663010933843
20.2865658029914 6.64893644003915 0.594698954320119
20.3067894186825 9.41489399909543 0.707666767848775
20.3270130343735 7.50000030436416 0.631613966431975
20.3472366500646 7.2872343382829 0.622590446048853
20.3674602657557 7.60638328740478 0.636077724914372
20.3876838814467 7.97872372804697 0.651460064411727
20.4079074971378 8.45744715172979 0.670719187480671
20.4281311128289 8.40425566020948 0.668606680855476
20.4483547285199 8.40425566020948 0.668606680855476
20.468578344211 7.18085135524228 0.618029282454318
20.488801959902 7.81914925348604 0.64491256090486
20.5090255755931 7.81914925348604 0.64491256090486
20.5292491912842 8.98936206693292 0.691489389764071
20.5494728069752 7.50000030436416 0.631613966431975
20.5696964226663 8.03191521956729 0.653627990751228
20.5899200383574 7.60638328740478 0.636077724914372
20.6101436540484 8.72340460933136 0.681183457157842
20.6303672697395 8.13829820260791 0.657942413767192
20.6505908854306 7.60638328740478 0.636077724914372
20.6708145011216 8.13829820260791 0.657942413767192
20.6910381168127 7.71276627044541 0.640510375928879
20.7112617325038 9.04255355845324 0.693532198911084
20.7314853481948 7.34042582980322 0.624858542617019
20.7517089638859 8.77659610085167 0.683257079784517
20.771932579577 7.44680881284384 0.629370215232479
20.792156195268 7.39361732132353 0.62711843622367
20.8123798109591 7.6595747789251 0.638297898243758
20.8326034266502 8.40425566020948 0.668606680855476
20.8528270423412 7.2872343382829 0.622590446048853
20.8730506580323 8.67021311781104 0.679103502814817
20.8932742737234 8.61702162629073 0.677017158397923
20.9134978894144 7.55319179588447 0.633849775074574
20.9337215051055 8.61702162629073 0.677017158397923
20.9539451207966 8.77659610085167 0.683257079784517
20.9741687364876 8.0851067110876 0.655788750333248
20.9943923521787 6.80851091460008 0.601793029687043
21.0146159678698 8.77659610085167 0.683257079784517
21.0348395835608 7.87234074500635 0.647102423100873
21.0550631992519 8.40425566020948 0.668606680855476
21.075286814943 8.72340460933136 0.681183457157842
21.095510430634 8.0851067110876 0.655788750333248
21.1157340463251 8.29787267716885 0.664361516152362
21.1359576620162 7.39361732132353 0.62711843622367
21.1561812777072 7.71276627044541 0.640510375928879
21.1764048933983 8.35106416868917 0.666487478437833
21.1966285090894 8.51063864325011 0.672825061382888
21.2168521247804 8.03191521956729 0.653627990751228
21.2370757404715 8.0851067110876 0.655788750333248
21.2572993561625 7.2872343382829 0.622590446048853
21.2775229718536 7.2872343382829 0.622590446048853
21.2977465875447 8.82978759237199 0.685324428169477
21.3179702032357 6.43617047395789 0.585106406723445
21.3381938189268 7.18085135524228 0.618029282454318
21.3584174346179 8.13829820260791 0.657942413767192
21.3786410503089 6.54255345699852 0.5899221785364
21.398864666 7.6595747789251 0.638297898243758
21.4190882816911 7.6595747789251 0.638297898243758
21.4393118973821 8.35106416868917 0.666487478437833
21.4595355130732 6.91489389764071 0.606476314558303
21.4797591287643 7.71276627044541 0.640510375928879
21.4999827444553 7.76595776196572 0.64271523744401
21.5202063601464 8.67021311781104 0.679103502814817
21.5404299758375 8.24468118564854 0.662228728895168
21.5606535915285 7.92553223652666 0.64928489952653
21.5808772072196 6.75531942307977 0.599437666325494
21.6011008229107 9.57446847365637 0.713638745184143
21.6213244386017 7.87234074500635 0.647102423100873
21.6415480542928 7.18085135524228 0.618029282454318
21.6617716699839 7.44680881284384 0.629370215232479
21.6819952856749 7.34042582980322 0.624858542617019
21.702218901366 9.3085110160548 0.703657292136748
21.7224425170571 8.51063864325011 0.672825061382888
21.7426661327481 7.34042582980322 0.624858542617019
21.7628897484392 8.40425566020948 0.668606680855476
21.7831133641303 8.77659610085167 0.683257079784517
21.8033369798213 8.40425566020948 0.668606680855476
21.8235605955124 9.14893654149386 0.697599871320769
21.8437842112035 7.60638328740478 0.636077724914372
21.8640078268945 7.97872372804697 0.651460064411727
21.8842314425856 7.97872372804697 0.651460064411727
21.9044550582767 7.87234074500635 0.647102423100873
21.9246786739677 6.64893644003915 0.594698954320119
21.9449022896588 7.55319179588447 0.633849775074574
21.9651259053499 7.60638328740478 0.636077724914372
21.9853495210409 9.52127698213606 0.711653654425974
22.005573136732 7.60638328740478 0.636077724914372
22.025796752423 7.87234074500635 0.647102423100873
22.0460203681141 7.81914925348604 0.64491256090486
22.0662439838052 7.34042582980322 0.624858542617019
22.0864675994962 8.19148969412823 0.660089050510576
22.1066912151873 9.04255355845324 0.693532198911084
22.1269148308784 7.92553223652666 0.64928489952653
22.1471384465694 8.82978759237199 0.685324428169477
22.1673620622605 8.45744715172979 0.670719187480671
22.1875856779516 8.72340460933136 0.681183457157842
22.2078092936426 7.81914925348604 0.64491256090486
22.2280329093337 7.71276627044541 0.640510375928879
22.2482565250248 7.92553223652666 0.64928489952653
22.2684801407158 7.60638328740478 0.636077724914372
22.2887037564069 7.97872372804697 0.651460064411727
22.308927372098 7.02127688068134 0.611123710602471
22.329150987789 8.51063864325011 0.672825061382888
22.3493746034801 8.03191521956729 0.653627990751228
22.3695982191712 8.77659610085167 0.683257079784517
22.3898218348622 8.29787267716885 0.664361516152362
22.4100454505533 7.12765986372196 0.615736030455294
22.4302690662444 8.35106416868917 0.666487478437833
22.4504926819354 8.03191521956729 0.653627990751228
22.4707162976265 8.19148969412823 0.660089050510576
22.4909399133176 7.76595776196572 0.64271523744401
22.5111635290086 6.43617047395789 0.585106406723445
22.5313871446997 7.87234074500635 0.647102423100873
22.5516107603908 7.34042582980322 0.624858542617019
22.5718343760818 8.24468118564854 0.662228728895168
22.5920579917729 8.24468118564854 0.662228728895168
22.612281607464 7.71276627044541 0.640510375928879
22.632505223155 7.71276627044541 0.640510375928879
22.6527288388461 7.76595776196572 0.64271523744401
22.6729524545372 8.51063864325011 0.672825061382888
22.6931760702282 8.72340460933136 0.681183457157842
22.7133996859193 8.03191521956729 0.653627990751228
22.7336233016104 6.64893644003915 0.594698954320119
22.7538469173014 8.29787267716885 0.664361516152362
22.7740705329925 8.19148969412823 0.660089050510576
22.7942941486835 7.18085135524228 0.618029282454318
22.8145177643746 8.19148969412823 0.660089050510576
22.8347413800657 7.23404284676259 0.620314056540036
22.8549649957567 6.8617024061204 0.604139210240542
22.8751886114478 7.12765986372196 0.615736030455294
22.8954122271389 6.8617024061204 0.604139210240542
22.9156358428299 7.34042582980322 0.624858542617019
22.935859458521 7.60638328740478 0.636077724914372
22.9560830742121 7.39361732132353 0.62711843622367
22.9763066899031 8.51063864325011 0.672825061382888
22.9965303055942 7.55319179588447 0.633849775074574
23.0167539212853 7.34042582980322 0.624858542617019
23.0369775369763 8.29787267716885 0.664361516152362
23.0572011526674 7.71276627044541 0.640510375928879
23.0774247683585 8.35106416868917 0.666487478437833
23.0976483840495 8.24468118564854 0.662228728895168
23.1178719997406 8.82978759237199 0.685324428169477
23.1380956154317 7.23404284676259 0.620314056540036
23.1583192311227 7.18085135524228 0.618029282454318
23.1785428468138 8.67021311781104 0.679103502814817
23.1987664625049 7.18085135524228 0.618029282454318
23.2189900781959 8.0851067110876 0.655788750333248
23.239213693887 7.34042582980322 0.624858542617019
23.2594373095781 7.97872372804697 0.651460064411727
23.2796609252691 6.96808538916102 0.608804447167049
23.2998845409602 7.50000030436416 0.631613966431975
23.3201081566513 6.96808538916102 0.608804447167049
23.3403317723423 6.48936196547821 0.587519226884514
23.3605553880334 8.24468118564854 0.662228728895168
23.3807790037245 7.76595776196572 0.64271523744401
23.4010026194155 8.0851067110876 0.655788750333248
23.4212262351066 7.2872343382829 0.622590446048853
23.4414498507977 6.96808538916102 0.608804447167049
23.4616734664887 8.03191521956729 0.653627990751228
23.4818970821798 7.2872343382829 0.622590446048853
23.5021206978709 8.0851067110876 0.655788750333248
23.5223443135619 6.48936196547821 0.587519226884514
23.542567929253 7.71276627044541 0.640510375928879
23.562791544944 7.87234074500635 0.647102423100873
23.5830151606351 7.12765986372196 0.615736030455294
23.6032387763262 8.40425566020948 0.668606680855476
23.6234623920172 8.77659610085167 0.683257079784517
23.6436860077083 7.02127688068134 0.611123710602471
23.6639096233994 8.61702162629073 0.677017158397923
23.6841332390904 7.76595776196572 0.64271523744401
23.7043568547815 7.6595747789251 0.638297898243758
23.7245804704726 8.72340460933136 0.681183457157842
23.7448040861636 8.24468118564854 0.662228728895168
23.7650277018547 6.32978749091727 0.580250667943183
23.7852513175458 6.22340450787664 0.575353950284691
23.8054749332368 8.03191521956729 0.653627990751228
23.8256985489279 7.55319179588447 0.633849775074574
23.845922164619 8.56383013477042 0.674924364647657
23.86614578031 7.76595776196572 0.64271523744401
23.8863693960011 7.02127688068134 0.611123710602471
23.9065930116922 7.55319179588447 0.633849775074574
23.9268166273832 8.29787267716885 0.664361516152362
23.9470402430743 7.39361732132353 0.62711843622367
23.9672638587654 7.87234074500635 0.647102423100873
23.9874874744564 8.0851067110876 0.655788750333248
24.0077110901475 7.6595747789251 0.638297898243758
24.0279347058386 7.97872372804697 0.651460064411727
24.0481583215296 8.19148969412823 0.660089050510576
24.0683819372207 7.23404284676259 0.620314056540036
24.0886055529118 6.96808538916102 0.608804447167049
24.1088291686028 8.0851067110876 0.655788750333248
24.1290527842939 7.34042582980322 0.624858542617019
24.149276399985 7.76595776196572 0.64271523744401
24.169500015676 7.39361732132353 0.62711843622367
24.1897236313671 7.87234074500635 0.647102423100873
24.2099472470582 7.6595747789251 0.638297898243758
24.2301708627492 7.97872372804697 0.651460064411727
24.2503944784403 8.29787267716885 0.664361516152362
24.2706180941314 7.18085135524228 0.618029282454318
24.2908417098224 8.13829820260791 0.657942413767192
24.3110653255135 6.75531942307977 0.599437666325494
24.3312889412045 8.13829820260791 0.657942413767192
24.3515125568956 8.35106416868917 0.666487478437833
24.3717361725867 7.60638328740478 0.636077724914372
24.3919597882777 7.23404284676259 0.620314056540036
24.4121834039688 7.02127688068134 0.611123710602471
24.4324070196599 8.77659610085167 0.683257079784517
24.4526306353509 7.76595776196572 0.64271523744401
24.472854251042 8.67021311781104 0.679103502814817
24.4930778667331 8.61702162629073 0.677017158397923
24.5133014824241 8.72340460933136 0.681183457157842
24.5335250981152 6.75531942307977 0.599437666325494
24.5537487138063 7.60638328740478 0.636077724914372
24.5739723294973 7.44680881284384 0.629370215232479
24.5941959451884 7.6595747789251 0.638297898243758
24.6144195608795 6.96808538916102 0.608804447167049
24.6346431765705 7.02127688068134 0.611123710602471
24.6548667922616 6.96808538916102 0.608804447167049
24.6750904079527 7.18085135524228 0.618029282454318
24.6953140236437 7.50000030436416 0.631613966431975
24.7155376393348 6.70212793155946 0.59707301148151
24.7357612550259 7.12765986372196 0.615736030455294
24.7559848707169 7.97872372804697 0.651460064411727
24.776208486408 7.2872343382829 0.622590446048853
24.7964321020991 7.81914925348604 0.64491256090486
24.8166557177901 7.12765986372196 0.615736030455294
24.8368793334812 8.77659610085167 0.683257079784517
24.8571029491723 6.27659599939695 0.5778074963847
24.8773265648633 6.96808538916102 0.608804447167049
24.8975501805544 7.39361732132353 0.62711843622367
24.9177737962455 7.50000030436416 0.631613966431975
24.9379974119365 7.55319179588447 0.633849775074574
24.9582210276276 7.02127688068134 0.611123710602471
24.9784446433187 7.81914925348604 0.64491256090486
24.9986682590097 7.81914925348604 0.64491256090486
25.0188918747008 8.19148969412823 0.660089050510576
25.0391154903919 6.64893644003915 0.594698954320119
25.0593391060829 8.13829820260791 0.657942413767192
25.079562721774 7.23404284676259 0.620314056540036
25.099786337465 7.92553223652666 0.64928489952653
25.1200099531561 8.8829790838923 0.687385558923066
25.1402335688472 8.29787267716885 0.664361516152362
25.1604571845382 6.70212793155946 0.59707301148151
25.1806808002293 7.39361732132353 0.62711843622367
25.2009044159204 7.07446837220165 0.613434205461912
25.2211280316114 7.07446837220165 0.613434205461912
25.2413516473025 7.34042582980322 0.624858542617019
25.2615752629936 7.07446837220165 0.613434205461912
25.2817988786846 8.67021311781104 0.679103502814817
25.3020224943757 7.02127688068134 0.611123710602471
25.3222461100668 8.35106416868917 0.666487478437833
25.3424697257578 8.35106416868917 0.666487478437833
25.3626933414489 8.40425566020948 0.668606680855476
25.38291695714 7.44680881284384 0.629370215232479
25.403140572831 7.2872343382829 0.622590446048853
25.4233641885221 8.56383013477042 0.674924364647657
25.4435878042132 6.96808538916102 0.608804447167049
25.4638114199042 5.79787257571413 0.555335475138186
25.4840350355953 7.02127688068134 0.611123710602471
25.5042586512864 7.12765986372196 0.615736030455294
25.5244822669774 7.6595747789251 0.638297898243758
25.5447058826685 6.38297898243758 0.582683595460406
25.5649294983596 7.18085135524228 0.618029282454318
25.5851531140506 6.27659599939695 0.5778074963847
25.6053767297417 7.18085135524228 0.618029282454318
25.6256003454328 7.18085135524228 0.618029282454318
25.6458239611238 6.64893644003915 0.594698954320119
25.6660475768149 7.12765986372196 0.615736030455294
25.686271192506 7.12765986372196 0.615736030455294
25.706494808197 8.0851067110876 0.655788750333248
25.7267184238881 7.87234074500635 0.647102423100873
25.7469420395792 6.8617024061204 0.604139210240542
25.7671656552702 7.34042582980322 0.624858542617019
25.7873892709613 7.2872343382829 0.622590446048853
25.8076128866524 7.18085135524228 0.618029282454318
25.8278365023434 8.40425566020948 0.668606680855476
25.8480601180345 8.45744715172979 0.670719187480671
25.8682837337255 7.71276627044541 0.640510375928879
25.8885073494166 8.67021311781104 0.679103502814817
25.9087309651077 7.07446837220165 0.613434205461912
25.9289545807987 6.64893644003915 0.594698954320119
25.9491781964898 7.55319179588447 0.633849775074574
25.9694018121809 7.44680881284384 0.629370215232479
25.9896254278719 8.35106416868917 0.666487478437833
26.009849043563 8.03191521956729 0.653627990751228
26.0300726592541 6.80851091460008 0.601793029687043
26.0502962749451 7.12765986372196 0.615736030455294
26.0705198906362 7.2872343382829 0.622590446048853
26.0907435063273 7.60638328740478 0.636077724914372
26.1109671220183 7.76595776196572 0.64271523744401
26.1311907377094 7.07446837220165 0.613434205461912
26.1514143534005 7.23404284676259 0.620314056540036
26.1716379690915 6.8617024061204 0.604139210240542
26.1918615847826 8.03191521956729 0.653627990751228
26.2120852004737 7.23404284676259 0.620314056540036
26.2323088161647 8.13829820260791 0.657942413767192
26.2525324318558 6.48936196547821 0.587519226884514
26.2727560475469 7.02127688068134 0.611123710602471
26.2929796632379 6.59574494851883 0.59231538178515
26.313203278929 8.13829820260791 0.657942413767192
26.3334268946201 7.07446837220165 0.613434205461912
26.3536505103111 6.48936196547821 0.587519226884514
26.3738741260022 6.01063854179539 0.565433310857768
26.3940977416933 7.50000030436416 0.631613966431975
26.4143213573843 8.03191521956729 0.653627990751228
26.4345449730754 7.50000030436416 0.631613966431975
26.4547685887665 8.77659610085167 0.683257079784517
26.4749922044575 8.0851067110876 0.655788750333248
26.4952158201486 8.19148969412823 0.660089050510576
26.5154394358397 5.85106406723445 0.55787706953872
26.5356630515307 8.45744715172979 0.670719187480671
26.5558866672218 7.97872372804697 0.651460064411727
26.5761102829129 7.6595747789251 0.638297898243758
26.5963338986039 7.92553223652666 0.64928489952653
26.616557514295 7.6595747789251 0.638297898243758
26.636781129986 8.56383013477042 0.674924364647657
26.6570047456771 7.71276627044541 0.640510375928879
26.6772283613682 8.19148969412823 0.660089050510576
26.6974519770592 7.97872372804697 0.651460064411727
26.7176755927503 7.39361732132353 0.62711843622367
26.7378992084414 6.54255345699852 0.5899221785364
26.7581228241324 7.71276627044541 0.640510375928879
26.7783464398235 8.0851067110876 0.655788750333248
26.7985700555146 9.3085110160548 0.703657292136748
26.8187936712056 6.38297898243758 0.582683595460406
26.8390172868967 7.92553223652666 0.64928489952653
26.8592409025878 6.75531942307977 0.599437666325494
26.8794645182788 7.81914925348604 0.64491256090486
26.8996881339699 7.18085135524228 0.618029282454318
26.919911749661 6.43617047395789 0.585106406723445
26.940135365352 8.13829820260791 0.657942413767192
26.9603589810431 7.44680881284384 0.629370215232479
26.9805825967342 7.6595747789251 0.638297898243758
27.0008062124252 7.6595747789251 0.638297898243758
27.0210298281163 6.75531942307977 0.599437666325494
27.0412534438074 7.81914925348604 0.64491256090486
27.0614770594984 6.91489389764071 0.606476314558303
27.0817006751895 7.6595747789251 0.638297898243758
27.1019242908806 6.64893644003915 0.594698954320119
27.1221479065716 8.03191521956729 0.653627990751228
27.1423715222627 9.20212803301418 0.699624838922197
27.1625951379538 6.8617024061204 0.604139210240542
27.1828187536448 7.97872372804697 0.651460064411727
27.2030423693359 7.34042582980322 0.624858542617019
27.223265985027 8.19148969412823 0.660089050510576
27.243489600718 7.97872372804697 0.651460064411727
27.2637132164091 7.23404284676259 0.620314056540036
27.2839368321002 6.96808538916102 0.608804447167049
27.3041604477912 7.87234074500635 0.647102423100873
27.3243840634823 7.44680881284384 0.629370215232479
27.3446076791734 7.23404284676259 0.620314056540036
27.3648312948644 7.18085135524228 0.618029282454318
27.3850549105555 7.50000030436416 0.631613966431975
27.4052785262465 6.38297898243758 0.582683595460406
27.4255021419376 7.02127688068134 0.611123710602471
27.4457257576287 7.76595776196572 0.64271523744401
27.4659493733197 7.81914925348604 0.64491256090486
27.4861729890108 6.75531942307977 0.599437666325494
27.5063966047019 8.13829820260791 0.657942413767192
27.5266202203929 6.54255345699852 0.5899221785364
27.546843836084 6.43617047395789 0.585106406723445
27.5670674517751 7.02127688068134 0.611123710602471
27.5872910674661 6.80851091460008 0.601793029687043
27.6075146831572 8.40425566020948 0.668606680855476
27.6277382988483 7.39361732132353 0.62711843622367
27.6479619145393 6.0638300333157 0.567929717304644
27.6681855302304 7.2872343382829 0.622590446048853
27.6884091459215 7.81914925348604 0.64491256090486
27.7086327616125 7.97872372804697 0.651460064411727
27.7288563773036 7.39361732132353 0.62711843622367
27.7490799929947 7.18085135524228 0.618029282454318
27.7693036086857 7.87234074500635 0.647102423100873
27.7895272243768 7.44680881284384 0.629370215232479
27.8097508400679 7.87234074500635 0.647102423100873
27.8299744557589 7.87234074500635 0.647102423100873
27.85019807145 6.59574494851883 0.59231538178515
27.8704216871411 8.03191521956729 0.653627990751228
27.8906453028321 6.38297898243758 0.582683595460406
27.9108689185232 6.96808538916102 0.608804447167049
27.9310925342143 7.55319179588447 0.633849775074574
27.9513161499053 6.75531942307977 0.599437666325494
27.9715397655964 6.32978749091727 0.580250667943183
27.9917633812875 7.44680881284384 0.629370215232479
28.0119869969785 7.50000030436416 0.631613966431975
28.0322106126696 8.29787267716885 0.664361516152362
28.0524342283607 7.76595776196572 0.64271523744401
28.0726578440517 8.13829820260791 0.657942413767192
28.0928814597428 8.29787267716885 0.664361516152362
28.1131050754339 7.34042582980322 0.624858542617019
28.1333286911249 7.2872343382829 0.622590446048853
28.153552306816 8.51063864325011 0.672825061382888
28.173775922507 6.96808538916102 0.608804447167049
28.1939995381981 7.18085135524228 0.618029282454318
28.2142231538892 6.64893644003915 0.594698954320119
28.2344467695802 7.92553223652666 0.64928489952653
28.2546703852713 7.81914925348604 0.64491256090486
28.2748940009624 8.13829820260791 0.657942413767192
28.2951176166534 6.54255345699852 0.5899221785364
28.3153412323445 7.76595776196572 0.64271523744401
28.3355648480356 7.55319179588447 0.633849775074574
28.3557884637266 8.72340460933136 0.681183457157842
28.3760120794177 6.17021301635633 0.572889896348368
28.3962356951088 8.03191521956729 0.653627990751228
28.4164593107998 7.60638328740478 0.636077724914372
28.4366829264909 8.13829820260791 0.657942413767192
28.456906542182 6.48936196547821 0.587519226884514
28.477130157873 7.87234074500635 0.647102423100873
28.4973537735641 7.55319179588447 0.633849775074574
28.5175773892552 6.32978749091727 0.580250667943183
28.5378010049462 6.96808538916102 0.608804447167049
28.5580246206373 6.91489389764071 0.606476314558303
28.5782482363284 7.23404284676259 0.620314056540036
28.5984718520194 7.50000030436416 0.631613966431975
28.6186954677105 7.12765986372196 0.615736030455294
28.6389190834016 8.0851067110876 0.655788750333248
28.6591426990926 7.55319179588447 0.633849775074574
28.6793663147837 7.76595776196572 0.64271523744401
28.6995899304748 7.18085135524228 0.618029282454318
28.7198135461658 6.96808538916102 0.608804447167049
28.7400371618569 6.01063854179539 0.565433310857768
28.760260777548 8.51063864325011 0.672825061382888
28.780484393239 8.03191521956729 0.653627990751228
28.8007080089301 6.48936196547821 0.587519226884514
28.8209316246212 7.2872343382829 0.622590446048853
28.8411552403122 8.0851067110876 0.655788750333248
28.8613788560033 6.17021301635633 0.572889896348368
28.8816024716944 8.40425566020948 0.668606680855476
28.9018260873854 8.51063864325011 0.672825061382888
28.9220497030765 5.6382981011532 0.547639923340591
28.9422733187675 6.96808538916102 0.608804447167049
28.9624969344586 8.0851067110876 0.655788750333248
28.9827205501497 6.22340450787664 0.575353950284691
29.0029441658407 7.02127688068134 0.611123710602471
29.0231677815318 7.50000030436416 0.631613966431975
29.0433913972229 7.6595747789251 0.638297898243758
29.0636150129139 7.71276627044541 0.640510375928879
29.083838628605 7.39361732132353 0.62711843622367
29.1040622442961 8.35106416868917 0.666487478437833
29.1242858599871 8.8829790838923 0.687385558923066
29.1445094756782 8.82978759237199 0.685324428169477
29.1647330913693 6.75531942307977 0.599437666325494
29.1849567070603 6.75531942307977 0.599437666325494
29.2051803227514 5.69148959267351 0.550217066626112
29.2254039384425 6.48936196547821 0.587519226884514
29.2456275541335 8.35106416868917 0.666487478437833
29.2658511698246 7.87234074500635 0.647102423100873
29.2860747855157 7.97872372804697 0.651460064411727
29.3062984012067 7.60638328740478 0.636077724914372
29.3265220168978 7.60638328740478 0.636077724914372
29.3467456325889 7.60638328740478 0.636077724914372
29.3669692482799 8.35106416868917 0.666487478437833
29.387192863971 8.13829820260791 0.657942413767192
29.4074164796621 6.27659599939695 0.5778074963847
29.4276400953531 7.81914925348604 0.64491256090486
29.4478637110442 7.6595747789251 0.638297898243758
29.4680873267353 6.64893644003915 0.594698954320119
29.4883109424263 7.6595747789251 0.638297898243758
29.5085345581174 7.18085135524228 0.618029282454318
29.5287581738085 7.12765986372196 0.615736030455294
29.5489817894995 8.72340460933136 0.681183457157842
29.5692054051906 7.2872343382829 0.622590446048853
29.5894290208817 5.37234064355163 0.534567873881054
29.6096526365727 8.77659610085167 0.683257079784517
29.6298762522638 7.76595776196572 0.64271523744401
29.6500998679549 7.6595747789251 0.638297898243758
29.6703234836459 8.0851067110876 0.655788750333248
29.690547099337 7.87234074500635 0.647102423100873
29.710770715028 8.8829790838923 0.687385558923066
29.7309943307191 8.29787267716885 0.664361516152362
29.7512179464102 8.29787267716885 0.664361516152362
29.7714415621012 9.94680891429856 0.727382706708846
29.7916651777923 9.89361742277825 0.725435226087713
29.8118887934834 8.0851067110876 0.655788750333248
29.8321124091744 8.61702162629073 0.677017158397923
29.8523360248655 9.73404294821731 0.71956115997076
29.8725596405566 9.14893654149386 0.697599871320769
29.8927832562476 8.45744715172979 0.670719187480671
29.9130068719387 9.52127698213606 0.711653654425974
29.9332304876298 8.82978759237199 0.685324428169477
29.9534541033208 9.41489399909543 0.707666767848775
29.9736777190119 10.0000004058189 0.729324987086856
29.993901334703 8.8829790838923 0.687385558923066
30.014124950394 9.3085110160548 0.703657292136748
30.0343485660851 9.84042593125793 0.723482503229191
30.0545721817762 10.8510642701439 0.759726459399521
30.0747957974672 10.4255323379814 0.744680881284384
30.0950194131583 9.09574504997355 0.695569008579737
30.1152430288494 9.57446847365637 0.713638745184143
30.1354666445404 9.680851456697 0.717592452697427
30.1556902602315 9.09574504997355 0.695569008579737
30.1759138759226 8.98936206693292 0.691489389764071
30.1961374916136 9.20212803301418 0.699624838922197
30.2163611073047 8.77659610085167 0.683257079784517
30.2365847229958 9.20212803301418 0.699624838922197
30.2568083386868 10.4255323379814 0.744680881284384
30.2770319543779 9.94680891429856 0.727382706708846
30.297255570069 10.3191493549408 0.740871746937468
30.31747918576 9.680851456697 0.717592452697427
30.3377028014511 8.40425566020948 0.668606680855476
30.3579264171422 9.36170250757512 0.705664877648999
30.3781500328332 8.19148969412823 0.660089050510576
30.3983736485243 8.77659610085167 0.683257079784517
30.4185972642154 10.1595748803798 0.735121038400963
30.4388208799064 9.09574504997355 0.695569008579737
30.4590444955975 7.81914925348604 0.64491256090486
30.4792681112885 9.20212803301418 0.699624838922197
30.4994917269796 8.77659610085167 0.683257079784517
30.5197153426707 8.40425566020948 0.668606680855476
30.5399389583617 8.29787267716885 0.664361516152362
30.5601625740528 7.6595747789251 0.638297898243758
30.5803861897439 8.82978759237199 0.685324428169477
30.6006098054349 8.67021311781104 0.679103502814817
30.620833421126 9.46808549061574 0.709663010933843
30.6410570368171 9.46808549061574 0.709663010933843
30.6612806525081 8.19148969412823 0.660089050510576
30.6815042681992 8.03191521956729 0.653627990751228
30.7017278838903 8.35106416868917 0.666487478437833
30.7219514995813 7.97872372804697 0.651460064411727
30.7421751152724 8.82978759237199 0.685324428169477
30.7623987309635 8.13829820260791 0.657942413767192
30.7826223466545 8.03191521956729 0.653627990751228
30.8028459623456 7.2872343382829 0.622590446048853
30.8230695780367 7.50000030436416 0.631613966431975
30.8432931937277 8.45744715172979 0.670719187480671
30.8635168094188 7.12765986372196 0.615736030455294
30.8837404251099 8.40425566020948 0.668606680855476
30.9039640408009 6.91489389764071 0.606476314558303
30.924187656492 8.13829820260791 0.657942413767192
30.9444112721831 7.44680881284384 0.629370215232479
30.9646348878741 8.35106416868917 0.666487478437833
30.9848585035652 8.51063864325011 0.672825061382888
31.0050821192563 7.18085135524228 0.618029282454318
31.0253057349473 7.50000030436416 0.631613966431975
31.0455293506384 7.6595747789251 0.638297898243758
31.0657529663295 8.40425566020948 0.668606680855476
31.0859765820205 7.60638328740478 0.636077724914372
31.1062001977116 7.50000030436416 0.631613966431975
31.1264238134027 6.80851091460008 0.601793029687043
31.1466474290937 7.71276627044541 0.640510375928879
31.1668710447848 7.2872343382829 0.622590446048853
31.1870946604759 7.23404284676259 0.620314056540036
31.2073182761669 7.92553223652666 0.64928489952653
31.227541891858 8.45744715172979 0.670719187480671
31.247765507549 7.71276627044541 0.640510375928879
31.2679891232401 6.96808538916102 0.608804447167049
31.2882127389312 7.23404284676259 0.620314056540036
31.3084363546222 9.14893654149386 0.697599871320769
31.3286599703133 6.96808538916102 0.608804447167049
31.3488835860044 7.12765986372196 0.615736030455294
31.3691072016954 7.2872343382829 0.622590446048853
31.3893308173865 7.12765986372196 0.615736030455294
31.4095544330776 6.43617047395789 0.585106406723445
31.4297780487686 7.2872343382829 0.622590446048853
31.4500016644597 7.81914925348604 0.64491256090486
31.4702252801508 8.24468118564854 0.662228728895168
31.4904488958418 7.12765986372196 0.615736030455294
31.5106725115329 7.50000030436416 0.631613966431975
31.530896127224 7.39361732132353 0.62711843622367
31.551119742915 6.80851091460008 0.601793029687043
31.5713433586061 6.70212793155946 0.59707301148151
31.5915669742972 7.87234074500635 0.647102423100873
31.6117905899882 7.07446837220165 0.613434205461912
31.6320142056793 8.13829820260791 0.657942413767192
31.6522378213704 6.54255345699852 0.5899221785364
31.6724614370614 7.55319179588447 0.633849775074574
31.6926850527525 6.8617024061204 0.604139210240542
31.7129086684436 6.75531942307977 0.599437666325494
31.7331322841346 6.59574494851883 0.59231538178515
31.7533558998257 7.07446837220165 0.613434205461912
31.7735795155168 7.44680881284384 0.629370215232479
31.7938031312078 6.01063854179539 0.565433310857768
31.8140267468989 8.03191521956729 0.653627990751228
31.83425036259 7.97872372804697 0.651460064411727
31.854473978281 8.03191521956729 0.653627990751228
31.8746975939721 8.13829820260791 0.657942413767192
31.8949212096632 7.07446837220165 0.613434205461912
31.9151448253542 6.8617024061204 0.604139210240542
31.9353684410453 7.02127688068134 0.611123710602471
31.9555920567364 7.18085135524228 0.618029282454318
31.9758156724274 7.23404284676259 0.620314056540036
31.9960392881185 6.48936196547821 0.587519226884514
32.0162629038095 8.03191521956729 0.653627990751228
32.0364865195006 8.51063864325011 0.672825061382888
32.0567101351917 7.23404284676259 0.620314056540036
32.0769337508827 5.95744705027507 0.562925833709398
32.0971573665738 6.8617024061204 0.604139210240542
32.1173809822649 6.70212793155946 0.59707301148151
32.1376045979559 7.87234074500635 0.647102423100873
32.157828213647 8.82978759237199 0.685324428169477
32.1780518293381 6.64893644003915 0.594698954320119
32.1982754450291 5.58510660963288 0.545050594776606
32.2184990607202 7.76595776196572 0.64271523744401
32.2387226764113 7.81914925348604 0.64491256090486
32.2589462921023 8.24468118564854 0.662228728895168
32.2791699077934 6.38297898243758 0.582683595460406
32.2993935234845 6.54255345699852 0.5899221785364
32.3196171391755 7.2872343382829 0.622590446048853
32.3398407548666 7.12765986372196 0.615736030455294
32.3600643705577 5.53191511811257 0.542448906438364
32.3802879862487 6.59574494851883 0.59231538178515
32.4005116019398 7.60638328740478 0.636077724914372
32.4207352176309 6.91489389764071 0.606476314558303
32.4409588333219 6.38297898243758 0.582683595460406
32.461182449013 7.81914925348604 0.64491256090486
32.4814060647041 8.45744715172979 0.670719187480671
32.5016296803951 7.76595776196572 0.64271523744401
32.5218532960862 8.51063864325011 0.672825061382888
32.5420769117773 7.07446837220165 0.613434205461912
32.5623005274683 6.32978749091727 0.580250667943183
32.5825241431594 7.07446837220165 0.613434205461912
32.6027477588505 6.8617024061204 0.604139210240542
32.6229713745415 7.07446837220165 0.613434205461912
32.6431949902326 7.02127688068134 0.611123710602471
32.6634186059237 7.34042582980322 0.624858542617019
32.6836422216147 7.97872372804697 0.651460064411727
32.7038658373058 6.38297898243758 0.582683595460406
32.7240894529969 7.34042582980322 0.624858542617019
32.7443130686879 6.96808538916102 0.608804447167049
32.764536684379 7.2872343382829 0.622590446048853
32.78476030007 6.59574494851883 0.59231538178515
32.8049839157611 6.8617024061204 0.604139210240542
32.8252075314522 7.92553223652666 0.64928489952653
32.8454311471432 6.0638300333157 0.567929717304644
32.8656547628343 6.64893644003915 0.594698954320119
32.8858783785254 5.95744705027507 0.562925833709398
32.9061019942164 7.18085135524228 0.618029282454318
32.9263256099075 7.55319179588447 0.633849775074574
32.9465492255986 7.2872343382829 0.622590446048853
32.9667728412896 6.80851091460008 0.601793029687043
32.9869964569807 6.96808538916102 0.608804447167049
33.0072200726718 7.44680881284384 0.629370215232479
33.0274436883628 7.2872343382829 0.622590446048853
33.0476673040539 8.03191521956729 0.653627990751228
33.067890919745 6.64893644003915 0.594698954320119
33.088114535436 6.64893644003915 0.594698954320119
33.1083381511271 8.03191521956729 0.653627990751228
33.1285617668182 5.58510660963288 0.545050594776606
33.1487853825092 7.2872343382829 0.622590446048853
33.1690089982003 7.39361732132353 0.62711843622367
33.1892326138914 6.27659599939695 0.5778074963847
33.2094562295824 8.24468118564854 0.662228728895168
33.2296798452735 8.03191521956729 0.653627990751228
33.2499034609646 7.23404284676259 0.620314056540036
33.2701270766556 6.54255345699852 0.5899221785364
33.2903506923467 6.64893644003915 0.594698954320119
33.3105743080378 6.64893644003915 0.594698954320119
33.3307979237288 6.75531942307977 0.599437666325494
33.3510215394199 6.22340450787664 0.575353950284691
33.371245155111 7.12765986372196 0.615736030455294
33.391468770802 7.2872343382829 0.622590446048853
33.4116923864931 7.6595747789251 0.638297898243758
33.4319160021842 5.85106406723445 0.55787706953872
33.4521396178752 7.60638328740478 0.636077724914372
33.4723632335663 7.12765986372196 0.615736030455294
33.4925868492574 7.50000030436416 0.631613966431975
33.5128104649484 6.38297898243758 0.582683595460406
33.5330340806395 6.43617047395789 0.585106406723445
33.5532576963305 6.11702152483601 0.570415198401908
33.5734813120216 6.59574494851883 0.59231538178515
33.5937049277127 6.48936196547821 0.587519226884514
33.6139285434037 6.43617047395789 0.585106406723445
33.6341521590948 5.69148959267351 0.550217066626112
33.6543757747859 7.50000030436416 0.631613966431975
33.6745993904769 6.11702152483601 0.570415198401908
33.694823006168 7.39361732132353 0.62711843622367
33.7150466218591 7.50000030436416 0.631613966431975
33.7352702375501 7.50000030436416 0.631613966431975
33.7554938532412 6.22340450787664 0.575353950284691
33.7757174689323 6.64893644003915 0.594698954320119
33.7959410846233 6.43617047395789 0.585106406723445
33.8161647003144 6.54255345699852 0.5899221785364
33.8363883160055 8.93617057541261 0.68944052780942
33.8566119316965 6.8617024061204 0.604139210240542
33.8768355473876 7.71276627044541 0.640510375928879
33.8970591630787 7.76595776196572 0.64271523744401
33.9172827787697 7.87234074500635 0.647102423100873
33.9375063944608 6.80851091460008 0.601793029687043
33.9577300101519 7.50000030436416 0.631613966431975
33.9779536258429 6.59574494851883 0.59231538178515
33.998177241534 8.45744715172979 0.670719187480671
34.0184008572251 8.03191521956729 0.653627990751228
34.0386244729161 7.12765986372196 0.615736030455294
34.0588480886072 7.81914925348604 0.64491256090486
34.0790717042983 7.02127688068134 0.611123710602471
34.0992953199893 7.39361732132353 0.62711843622367
34.1195189356804 6.8617024061204 0.604139210240542
34.1397425513715 7.39361732132353 0.62711843622367
34.1599661670625 6.80851091460008 0.601793029687043
34.1801897827536 6.27659599939695 0.5778074963847
34.2004133984447 8.03191521956729 0.653627990751228
34.2206370141357 6.48936196547821 0.587519226884514
34.2408606298268 7.55319179588447 0.633849775074574
34.2610842455179 7.12765986372196 0.615736030455294
34.2813078612089 7.50000030436416 0.631613966431975
34.3015314769 7.6595747789251 0.638297898243758
34.321755092591 7.23404284676259 0.620314056540036
34.3419787082821 6.75531942307977 0.599437666325494
34.3622023239732 7.81914925348604 0.64491256090486
34.3824259396642 8.0851067110876 0.655788750333248
34.4026495553553 6.48936196547821 0.587519226884514
34.4228731710464 7.02127688068134 0.611123710602471
34.4430967867374 7.34042582980322 0.624858542617019
34.4633204024285 7.34042582980322 0.624858542617019
34.4835440181196 8.19148969412823 0.660089050510576
34.5037676338106 8.29787267716885 0.664361516152362
34.5239912495017 8.19148969412823 0.660089050510576
34.5442148651928 7.97872372804697 0.651460064411727
34.5644384808838 8.45744715172979 0.670719187480671
34.5846620965749 7.02127688068134 0.611123710602471
34.604885712266 7.97872372804697 0.651460064411727
34.625109327957 7.71276627044541 0.640510375928879
34.6453329436481 7.55319179588447 0.633849775074574
34.6655565593392 7.23404284676259 0.620314056540036
34.6857801750302 8.56383013477042 0.674924364647657
34.7060037907213 10.8510642701439 0.759726459399521
34.7262274064124 8.40425566020948 0.668606680855476
34.7464510221034 8.13829820260791 0.657942413767192
34.7666746377945 7.81914925348604 0.64491256090486
34.7868982534856 9.04255355845324 0.693532198911084
34.8071218691766 8.29787267716885 0.664361516152362
34.8273454848677 9.73404294821731 0.71956115997076
34.8475691005588 10.1595748803798 0.735121038400963
34.8677927162498 8.82978759237199 0.685324428169477
34.8880163319409 8.72340460933136 0.681183457157842
34.908239947632 9.04255355845324 0.693532198911084
34.928463563323 10.7446812871033 0.755993137251537
34.9486871790141 9.25531952453449 0.701643962424722
34.9689107947052 9.73404294821731 0.71956115997076
34.9891344103962 9.20212803301418 0.699624838922197
35.0093580260873 10.7978727786236 0.757862097179676
35.0295816417784 8.35106416868917 0.666487478437833
35.0498052574694 10.7978727786236 0.757862097179676
35.0700288731605 10.4255323379814 0.744680881284384
35.0902524888515 10.2659578634204 0.738959816661245
35.1104761045426 10.2659578634204 0.738959816661245
35.1306997202337 11.0106387447048 0.765292295415417
35.1509233359247 10.2127663719001 0.737042926748412
35.1711469516158 11.9680855920705 0.797872372804697
35.1913705673069 12.3404260327127 0.810188661162378
35.2115941829979 12.234043049672 0.806688909763718
35.231817798689 12.6063834903142 0.818872603355897
35.2520414143801 13.0319154224767 0.832578536048167
35.2722650300711 12.1808515581517 0.804933327900902
35.2924886457622 12.9787239309564 0.830877658815035
35.3127122614533 13.2978728800783 0.84103132672861
35.3329358771443 13.9893622698424 0.862621031827366
35.3531594928354 14.1489367444033 0.8675269729878
35.3733831085265 13.4574473546392 0.84606246628092
35.3936067242175 14.8404261341674 0.888473072677725
35.4138303399086 15.7446814900127 0.915141022993747
35.4340539555997 13.6702133207205 0.852724478322263
35.4542775712907 13.8297877952814 0.857687029306403
35.4745011869818 16.1170219306549 0.925898717656057
35.4947248026729 13.5638303376799 0.849400003761281
35.5149484183639 15.4787240324111 0.907378872420591
35.535172034055 13.9893622698424 0.862621031827366
35.5553956497461 12.5531919987939 0.817143197828085
35.5756192654371 14.1489367444033 0.8675269729878
35.5958428811282 13.8297877952814 0.857687029306403
35.6160664968193 14.7340431511267 0.885282853856939
35.6362901125103 14.4148942020049 0.875642462830665
35.6565137282014 12.8191494563955 0.825754006715975
35.6767373438925 13.085106913997 0.834275945630859
35.6969609595835 12.4468090157533 0.813673359657546
35.7171845752746 13.7234048122408 0.854381864683545
35.7374081909657 12.393617524233 0.81193287988986
35.7576318066567 11.2234047107861 0.772651044458506
35.7778554223478 12.234043049672 0.806688909763718
35.7980790380389 10.2659578634204 0.738959816661245
35.8183026537299 12.1276600666314 0.803173908686945
35.838526269421 12.1808515581517 0.804933327900902
35.858749885112 10.7446812871033 0.755993137251537
35.8789735008031 9.89361742277825 0.725435226087713
35.8991971164942 12.0212770835908 0.799643456832577
35.9194207321852 11.8085111175095 0.792535373957864
35.9396443478763 10.9574472531845 0.763441525365265
35.9598679635674 9.3085110160548 0.703657292136748
35.9800915792584 10.3723408464611 0.742778755875753
36.0003151949495 10.3723408464611 0.742778755875753
36.0205388106406 10.7978727786236 0.757862097179676
36.0407624263316 9.3085110160548 0.703657292136748
36.0609860420227 10.531915321022 0.748470630346173
36.0812096577138 8.72340460933136 0.681183457157842
36.1014332734048 9.20212803301418 0.699624838922197
36.1216568890959 9.3085110160548 0.703657292136748
36.141880504787 8.82978759237199 0.685324428169477
36.162104120478 9.36170250757512 0.705664877648999
36.1823277361691 9.04255355845324 0.693532198911084
36.2025513518602 8.35106416868917 0.666487478437833
36.2227749675512 8.0851067110876 0.655788750333248
36.2429985832423 8.24468118564854 0.662228728895168
36.2632221989334 8.29787267716885 0.664361516152362
36.2834458146244 8.13829820260791 0.657942413767192
36.3036694303155 8.51063864325011 0.672825061382888
36.3238930460066 7.02127688068134 0.611123710602471
36.3441166616976 8.19148969412823 0.660089050510576
36.3643402773887 7.12765986372196 0.615736030455294
36.3845638930798 6.64893644003915 0.594698954320119
36.4047875087708 8.82978759237199 0.685324428169477
36.4250111244619 8.03191521956729 0.653627990751228
36.445234740153 7.50000030436416 0.631613966431975
36.465458355844 8.56383013477042 0.674924364647657
36.4856819715351 7.92553223652666 0.64928489952653
36.5059055872262 7.55319179588447 0.633849775074574
36.5261292029172 7.18085135524228 0.618029282454318
36.5463528186083 6.75531942307977 0.599437666325494
36.5665764342994 8.03191521956729 0.653627990751228
36.5868000499904 8.51063864325011 0.672825061382888
36.6070236656815 8.19148969412823 0.660089050510576
36.6272472813725 8.35106416868917 0.666487478437833
36.6474708970636 7.97872372804697 0.651460064411727
36.6676945127547 5.85106406723445 0.55787706953872
36.6879181284457 7.02127688068134 0.611123710602471
36.7081417441368 8.13829820260791 0.657942413767192
36.7283653598279 7.18085135524228 0.618029282454318
36.7485889755189 7.23404284676259 0.620314056540036
36.76881259121 5.74468108419382 0.552782195061309
36.7890362069011 7.87234074500635 0.647102423100873
36.8092598225921 7.87234074500635 0.647102423100873
36.8294834382832 7.50000030436416 0.631613966431975
36.8497070539743 7.12765986372196 0.615736030455294
36.8699306696653 6.91489389764071 0.606476314558303
36.8901542853564 7.60638328740478 0.636077724914372
36.9103779010475 7.12765986372196 0.615736030455294
36.9306015167385 7.2872343382829 0.622590446048853
36.9508251324296 8.24468118564854 0.662228728895168
36.9710487481207 6.91489389764071 0.606476314558303
36.9912723638117 7.87234074500635 0.647102423100873
37.0114959795028 7.50000030436416 0.631613966431975
37.0317195951939 6.96808538916102 0.608804447167049
37.0519432108849 7.18085135524228 0.618029282454318
37.072166826576 6.8617024061204 0.604139210240542
37.0923904422671 7.60638328740478 0.636077724914372
37.1126140579581 6.59574494851883 0.59231538178515
37.1328376736492 7.44680881284384 0.629370215232479
37.1530612893403 7.6595747789251 0.638297898243758
37.1732849050313 6.54255345699852 0.5899221785364
37.1935085207224 5.6382981011532 0.547639923340591
37.2137321364135 6.64893644003915 0.594698954320119
37.2339557521045 7.12765986372196 0.615736030455294
37.2541793677956 7.34042582980322 0.624858542617019
37.2744029834867 6.27659599939695 0.5778074963847
37.2946265991777 7.50000030436416 0.631613966431975
37.3148502148688 7.34042582980322 0.624858542617019
37.3350738305599 6.43617047395789 0.585106406723445
37.3552974462509 5.90425555875476 0.560407137255822
37.375521061942 6.8617024061204 0.604139210240542
37.395744677633 7.2872343382829 0.622590446048853
37.4159682933241 7.50000030436416 0.631613966431975
37.4361919090152 7.34042582980322 0.624858542617019
37.4564155247062 5.79787257571413 0.555335475138186
37.4766391403973 6.70212793155946 0.59707301148151
37.4968627560884 7.07446837220165 0.613434205461912
37.5170863717794 6.91489389764071 0.606476314558303
37.5373099874705 6.8617024061204 0.604139210240542
37.5575336031616 6.70212793155946 0.59707301148151
37.5777572188526 5.79787257571413 0.555335475138186
37.5979808345437 5.69148959267351 0.550217066626112
37.6182044502348 8.0851067110876 0.655788750333248
37.6384280659258 7.12765986372196 0.615736030455294
37.6586516816169 6.38297898243758 0.582683595460406
37.678875297308 6.70212793155946 0.59707301148151
37.699098912999 6.80851091460008 0.601793029687043
37.7193225286901 6.54255345699852 0.5899221785364
37.7395461443812 7.02127688068134 0.611123710602471
37.7597697600722 6.59574494851883 0.59231538178515
37.7799933757633 7.07446837220165 0.613434205461912
37.8002169914544 6.43617047395789 0.585106406723445
37.8204406071454 7.12765986372196 0.615736030455294
37.8406642228365 6.91489389764071 0.606476314558303
37.8608878385276 6.01063854179539 0.565433310857768
37.8811114542186 6.27659599939695 0.5778074963847
37.9013350699097 6.22340450787664 0.575353950284691
37.9215586856008 6.32978749091727 0.580250667943183
37.9417823012918 6.17021301635633 0.572889896348368
37.9620059169829 5.69148959267351 0.550217066626112
37.982229532674 5.53191511811257 0.542448906438364
38.002453148365 6.75531942307977 0.599437666325494
38.0226767640561 6.64893644003915 0.594698954320119
38.0429003797472 6.8617024061204 0.604139210240542
38.0631239954382 6.48936196547821 0.587519226884514
38.0833476111293 6.80851091460008 0.601793029687043
38.1035712268204 7.18085135524228 0.618029282454318
38.1237948425114 5.74468108419382 0.552782195061309
38.1440184582025 6.59574494851883 0.59231538178515
38.1642420738935 7.92553223652666 0.64928489952653
38.1844656895846 6.27659599939695 0.5778074963847
38.2046893052757 6.54255345699852 0.5899221785364
38.2249129209667 5.85106406723445 0.55787706953872
38.2451365366578 6.11702152483601 0.570415198401908
38.2653601523489 6.27659599939695 0.5778074963847
38.2855837680399 6.64893644003915 0.594698954320119
38.305807383731 4.73404274530787 0.501807527388583
38.3260309994221 6.96808538916102 0.608804447167049
38.3462546151131 5.00000020290944 0.515710644057907
38.3664782308042 5.47872362659226 0.539834679625181
38.3867018464953 5.37234064355163 0.534567873881054
38.4069254621863 6.32978749091727 0.580250667943183
38.4271490778774 5.42553213507194 0.537207731288247
38.4473726935685 6.59574494851883 0.59231538178515
38.4675963092595 6.11702152483601 0.570415198401908
38.4878199249506 5.31914915203132 0.531914915203132
38.5080435406417 5.95744705027507 0.562925833709398
38.5282671563327 6.0638300333157 0.567929717304644
38.5484907720238 5.31914915203132 0.531914915203132
38.5687143877149 4.89361721986881 0.510194863610278
38.5889380034059 6.22340450787664 0.575353950284691
38.609161619097 6.80851091460008 0.601793029687043
38.6293852347881 5.79787257571413 0.555335475138186
38.6496088504791 5.42553213507194 0.537207731288247
38.6698324661702 6.0638300333157 0.567929717304644
38.6900560818613 6.27659599939695 0.5778074963847
38.7102796975523 6.17021301635633 0.572889896348368
38.7305033132434 5.85106406723445 0.55787706953872
38.7507269289345 5.42553213507194 0.537207731288247
38.7709505446255 6.0638300333157 0.567929717304644
38.7911741603166 5.90425555875476 0.560407137255822
38.8113977760077 6.38297898243758 0.582683595460406
38.8316213916987 5.90425555875476 0.560407137255822
38.8518450073898 6.80851091460008 0.601793029687043
38.8720686230809 6.96808538916102 0.608804447167049
38.8922922387719 5.79787257571413 0.555335475138186
38.912515854463 6.54255345699852 0.5899221785364
38.932739470154 6.01063854179539 0.565433310857768
38.9529630858451 5.265957660511 0.529248658236749
38.9731867015362 5.05319169442975 0.518446528742142
38.9934103172272 5.69148959267351 0.550217066626112
39.0136339329183 5.58510660963288 0.545050594776606
39.0338575486094 6.43617047395789 0.585106406723445
39.0540811643004 5.85106406723445 0.55787706953872
39.0743047799915 6.27659599939695 0.5778074963847
39.0945283956826 6.75531942307977 0.599437666325494
39.1147520113736 5.90425555875476 0.560407137255822
39.1349756270647 5.47872362659226 0.539834679625181
39.1551992427558 6.0638300333157 0.567929717304644
39.1754228584468 6.48936196547821 0.587519226884514
39.1956464741379 6.17021301635633 0.572889896348368
39.215870089829 6.48936196547821 0.587519226884514
39.23609370552 4.89361721986881 0.510194863610278
39.2563173212111 6.59574494851883 0.59231538178515
39.2765409369022 6.0638300333157 0.567929717304644
39.2967645525932 5.6382981011532 0.547639923340591
39.3169881682843 6.91489389764071 0.606476314558303
39.3372117839754 5.47872362659226 0.539834679625181
39.3574353996664 5.74468108419382 0.552782195061309
39.3776590153575 6.17021301635633 0.572889896348368
39.3978826310486 5.37234064355163 0.534567873881054
39.4181062467396 5.79787257571413 0.555335475138186
39.4383298624307 5.85106406723445 0.55787706953872
39.4585534781218 6.38297898243758 0.582683595460406
39.4787770938128 6.59574494851883 0.59231538178515
39.4990007095039 6.11702152483601 0.570415198401908
39.519224325195 5.47872362659226 0.539834679625181
39.539447940886 5.42553213507194 0.537207731288247
39.5596715565771 5.85106406723445 0.55787706953872
39.5798951722682 6.11702152483601 0.570415198401908
39.6001187879592 7.07446837220165 0.613434205461912
39.6203424036503 5.69148959267351 0.550217066626112
39.6405660193414 6.11702152483601 0.570415198401908
39.6607896350324 5.265957660511 0.529248658236749
39.6810132507235 6.27659599939695 0.5778074963847
39.7012368664145 6.64893644003915 0.594698954320119
39.7214604821056 5.10638318595006 0.521168051529382
39.7416840977967 7.39361732132353 0.62711843622367
39.7619077134877 5.42553213507194 0.537207731288247
39.7821313291788 6.17021301635633 0.572889896348368
39.8023549448699 6.22340450787664 0.575353950284691
39.8225785605609 5.79787257571413 0.555335475138186
39.842802176252 5.79787257571413 0.555335475138186
39.8630257919431 5.85106406723445 0.55787706953872
39.8832494076341 5.85106406723445 0.55787706953872
39.9034730233252 5.69148959267351 0.550217066626112
39.9236966390163 5.79787257571413 0.555335475138186
39.9439202547073 6.43617047395789 0.585106406723445
39.9641438703984 5.265957660511 0.529248658236749
39.9843674860895 5.6382981011532 0.547639923340591
40.0045911017805 5.53191511811257 0.542448906438364
40.0248147174716 6.01063854179539 0.565433310857768
40.0450383331627 6.75531942307977 0.599437666325494
40.0652619488537 5.05319169442975 0.518446528742142
40.0854855645448 5.95744705027507 0.562925833709398
40.1057091802359 4.14893633858443 0.469774533230711
40.1259327959269 6.43617047395789 0.585106406723445
40.146156411618 6.32978749091727 0.580250667943183
40.1663800273091 5.85106406723445 0.55787706953872
40.1866036430001 5.69148959267351 0.550217066626112
40.2068272586912 6.32978749091727 0.580250667943183
40.2270508743823 5.74468108419382 0.552782195061309
40.2472744900733 6.32978749091727 0.580250667943183
40.2674981057644 7.23404284676259 0.620314056540036
40.2877217214555 6.32978749091727 0.580250667943183
40.3079453371465 5.00000020290944 0.515710644057907
40.3281689528376 4.8404257283485 0.507414489430638
40.3483925685287 4.89361721986881 0.510194863610278
40.3686161842197 6.11702152483601 0.570415198401908
40.3888397999108 5.37234064355163 0.534567873881054
40.4090634156019 6.91489389764071 0.606476314558303
40.4292870312929 5.95744705027507 0.562925833709398
40.449510646984 6.17021301635633 0.572889896348368
40.469734262675 5.15957467747038 0.523875436249008
40.4899578783661 5.74468108419382 0.552782195061309
40.5101814940572 5.265957660511 0.529248658236749
40.5304051097482 6.17021301635633 0.572889896348368
40.5506287254393 6.0638300333157 0.567929717304644
40.5708523411304 5.10638318595006 0.521168051529382
40.5910759568214 6.01063854179539 0.565433310857768
40.6112995725125 6.27659599939695 0.5778074963847
40.6315231882036 6.64893644003915 0.594698954320119
40.6517468038946 5.6382981011532 0.547639923340591
40.6719704195857 5.79787257571413 0.555335475138186
40.6921940352768 5.85106406723445 0.55787706953872
40.7124176509678 5.6382981011532 0.547639923340591
40.7326412666589 6.01063854179539 0.565433310857768
40.75286488235 6.11702152483601 0.570415198401908
40.773088498041 6.17021301635633 0.572889896348368
40.7933121137321 5.58510660963288 0.545050594776606
40.8135357294232 5.69148959267351 0.550217066626112
40.8337593451142 6.01063854179539 0.565433310857768
40.8539829608053 5.37234064355163 0.534567873881054
40.8742065764964 6.91489389764071 0.606476314558303
40.8944301921874 5.6382981011532 0.547639923340591
40.9146538078785 5.265957660511 0.529248658236749
40.9348774235696 5.58510660963288 0.545050594776606
40.9551010392606 5.10638318595006 0.521168051529382
40.9753246549517 4.46808528770631 0.487508072438874
40.9955482706428 6.11702152483601 0.570415198401908
41.0157718863338 6.38297898243758 0.582683595460406
41.0359955020249 4.94680871138912 0.512960167678218
41.056219117716 6.0638300333157 0.567929717304644
41.076442733407 7.07446837220165 0.613434205461912
41.0966663490981 5.74468108419382 0.552782195061309
41.1168899647892 5.79787257571413 0.555335475138186
41.1371135804802 6.32978749091727 0.580250667943183
41.1573371961713 5.85106406723445 0.55787706953872
41.1775608118624 6.75531942307977 0.599437666325494
41.1977844275534 6.0638300333157 0.567929717304644
41.2180080432445 5.58510660963288 0.545050594776606
41.2382316589355 5.74468108419382 0.552782195061309
41.2584552746266 6.17021301635633 0.572889896348368
41.2786788903177 6.0638300333157 0.567929717304644
41.2989025060087 6.38297898243758 0.582683595460406
41.3191261216998 5.95744705027507 0.562925833709398
41.3393497373909 5.42553213507194 0.537207731288247
41.3595733530819 5.58510660963288 0.545050594776606
41.379796968773 6.01063854179539 0.565433310857768
41.4000205844641 6.17021301635633 0.572889896348368
41.4202442001551 6.75531942307977 0.599437666325494
41.4404678158462 5.79787257571413 0.555335475138186
41.4606914315373 5.265957660511 0.529248658236749
41.4809150472283 5.265957660511 0.529248658236749
41.5011386629194 6.32978749091727 0.580250667943183
41.5213622786105 6.75531942307977 0.599437666325494
41.5415858943015 5.15957467747038 0.523875436249008
41.5618095099926 5.69148959267351 0.550217066626112
41.5820331256837 5.42553213507194 0.537207731288247
41.6022567413747 5.42553213507194 0.537207731288247
41.6224803570658 5.79787257571413 0.555335475138186
41.6427039727569 5.15957467747038 0.523875436249008
41.6629275884479 5.42553213507194 0.537207731288247
41.683151204139 5.10638318595006 0.521168051529382
41.7033748198301 6.11702152483601 0.570415198401908
41.7235984355211 6.01063854179539 0.565433310857768
41.7438220512122 6.64893644003915 0.594698954320119
41.7640456669033 5.90425555875476 0.560407137255822
41.7842692825943 5.21276616899069 0.526568900976162
41.8044928982854 7.18085135524228 0.618029282454318
41.8247165139765 5.90425555875476 0.560407137255822
41.8449401296675 5.265957660511 0.529248658236749
41.8651637453586 5.95744705027507 0.562925833709398
41.8853873610497 5.6382981011532 0.547639923340591
41.9056109767407 5.10638318595006 0.521168051529382
41.9258345924318 6.27659599939695 0.5778074963847
41.9460582081228 5.79787257571413 0.555335475138186
41.9662818238139 5.95744705027507 0.562925833709398
41.986505439505 5.74468108419382 0.552782195061309
42.006729055196 6.32978749091727 0.580250667943183
42.0269526708871 5.265957660511 0.529248658236749
42.0471762865782 5.47872362659226 0.539834679625181
42.0673999022692 4.89361721986881 0.510194863610278
42.0876235179603 6.96808538916102 0.608804447167049
42.1078471336514 5.85106406723445 0.55787706953872
42.1280707493424 4.73404274530787 0.501807527388583
42.1482943650335 6.27659599939695 0.5778074963847
42.1685179807246 5.74468108419382 0.552782195061309
42.1887415964156 5.37234064355163 0.534567873881054
42.2089652121067 5.79787257571413 0.555335475138186
42.2291888277978 6.0638300333157 0.567929717304644
42.2494124434888 6.64893644003915 0.594698954320119
42.2696360591799 6.32978749091727 0.580250667943183
42.289859674871 5.00000020290944 0.515710644057907
42.310083290562 7.23404284676259 0.620314056540036
42.3303069062531 6.17021301635633 0.572889896348368
42.3505305219442 5.58510660963288 0.545050594776606
42.3707541376352 5.6382981011532 0.547639923340591
42.3909777533263 5.79787257571413 0.555335475138186
42.4112013690174 7.23404284676259 0.620314056540036
42.4314249847084 5.00000020290944 0.515710644057907
42.4516486003995 5.95744705027507 0.562925833709398
42.4718722160906 6.32978749091727 0.580250667943183
42.4920958317816 6.48936196547821 0.587519226884514
42.5123194474727 5.58510660963288 0.545050594776606
42.5325430631638 5.58510660963288 0.545050594776606
42.5527666788548 6.8617024061204 0.604139210240542
42.5729902945459 6.01063854179539 0.565433310857768
42.593213910237 6.64893644003915 0.594698954320119
42.613437525928 5.85106406723445 0.55787706953872
42.6336611416191 6.59574494851883 0.59231538178515
42.6538847573102 6.8617024061204 0.604139210240542
42.6741083730012 5.6382981011532 0.547639923340591
42.6943319886923 7.76595776196572 0.64271523744401
42.7145556043833 6.80851091460008 0.601793029687043
42.7347792200744 6.54255345699852 0.5899221785364
42.7550028357655 6.80851091460008 0.601793029687043
42.7752264514565 6.70212793155946 0.59707301148151
42.7954500671476 6.32978749091727 0.580250667943183
42.8156736828387 6.80851091460008 0.601793029687043
42.8358972985297 6.64893644003915 0.594698954320119
42.8561209142208 5.79787257571413 0.555335475138186
42.8763445299119 6.48936196547821 0.587519226884514
42.8965681456029 6.01063854179539 0.565433310857768
42.916791761294 7.76595776196572 0.64271523744401
42.9370153769851 7.81914925348604 0.64491256090486
42.9572389926761 6.48936196547821 0.587519226884514
42.9774626083672 7.07446837220165 0.613434205461912
42.9976862240583 6.54255345699852 0.5899221785364
43.0179098397493 6.8617024061204 0.604139210240542
43.0381334554404 6.59574494851883 0.59231538178515
43.0583570711315 7.34042582980322 0.624858542617019
43.0785806868225 7.44680881284384 0.629370215232479
43.0988043025136 7.02127688068134 0.611123710602471
43.1190279182047 6.70212793155946 0.59707301148151
43.1392515338957 6.96808538916102 0.608804447167049
43.1594751495868 6.48936196547821 0.587519226884514
43.1796987652779 6.48936196547821 0.587519226884514
43.1999223809689 7.6595747789251 0.638297898243758
43.22014599666 5.95744705027507 0.562925833709398
43.2403696123511 6.32978749091727 0.580250667943183
43.2605932280421 6.75531942307977 0.599437666325494
43.2808168437332 6.38297898243758 0.582683595460406
43.3010404594243 6.43617047395789 0.585106406723445
43.3212640751153 6.70212793155946 0.59707301148151
43.3414876908064 6.64893644003915 0.594698954320119
43.3617113064975 7.39361732132353 0.62711843622367
43.3819349221885 5.58510660963288 0.545050594776606
43.4021585378796 7.76595776196572 0.64271523744401
43.4223821535707 6.8617024061204 0.604139210240542
43.4426057692617 7.12765986372196 0.615736030455294
43.4628293849528 5.74468108419382 0.552782195061309
43.4830530006438 5.90425555875476 0.560407137255822
43.5032766163349 6.54255345699852 0.5899221785364
43.523500232026 5.58510660963288 0.545050594776606
43.543723847717 6.32978749091727 0.580250667943183
43.5639474634081 5.74468108419382 0.552782195061309
43.5841710790992 6.43617047395789 0.585106406723445
43.6043946947902 7.6595747789251 0.638297898243758
43.6246183104813 5.95744705027507 0.562925833709398
43.6448419261724 6.64893644003915 0.594698954320119
43.6650655418634 6.27659599939695 0.5778074963847
43.6852891575545 6.64893644003915 0.594698954320119
43.7055127732456 5.31914915203132 0.531914915203132
43.7257363889366 5.58510660963288 0.545050594776606
43.7459600046277 5.53191511811257 0.542448906438364
43.7661836203188 6.43617047395789 0.585106406723445
43.7864072360098 6.8617024061204 0.604139210240542
43.8066308517009 5.58510660963288 0.545050594776606
43.826854467392 7.34042582980322 0.624858542617019
43.847078083083 6.17021301635633 0.572889896348368
43.8673016987741 4.57446827074693 0.493277599565779
43.8875253144652 6.0638300333157 0.567929717304644
43.9077489301562 6.17021301635633 0.572889896348368
43.9279725458473 6.0638300333157 0.567929717304644
43.9481961615384 5.37234064355163 0.534567873881054
43.9684197772294 6.38297898243758 0.582683595460406
43.9886433929205 5.58510660963288 0.545050594776606
44.0088670086116 6.01063854179539 0.565433310857768
44.0290906243026 6.70212793155946 0.59707301148151
44.0493142399937 5.95744705027507 0.562925833709398
44.0695378556848 5.6382981011532 0.547639923340591
44.0897614713758 5.74468108419382 0.552782195061309
44.1099850870669 5.42553213507194 0.537207731288247
44.130208702758 5.95744705027507 0.562925833709398
44.150432318449 6.11702152483601 0.570415198401908
44.1706559341401 5.6382981011532 0.547639923340591
44.1908795498312 6.59574494851883 0.59231538178515
44.2111031655222 6.38297898243758 0.582683595460406
44.2313267812133 5.53191511811257 0.542448906438364
44.2515503969043 5.42553213507194 0.537207731288247
44.2717740125954 5.31914915203132 0.531914915203132
44.2919976282865 5.79787257571413 0.555335475138186
44.3122212439775 5.79787257571413 0.555335475138186
44.3324448596686 4.78723423682818 0.504618796037166
44.3526684753597 5.79787257571413 0.555335475138186
44.3728920910507 6.27659599939695 0.5778074963847
44.3931157067418 6.22340450787664 0.575353950284691
44.4133393224329 5.31914915203132 0.531914915203132
44.4335629381239 5.69148959267351 0.550217066626112
44.453786553815 6.11702152483601 0.570415198401908
44.4740101695061 6.17021301635633 0.572889896348368
44.4942337851971 5.265957660511 0.529248658236749
44.5144574008882 6.27659599939695 0.5778074963847
44.5346810165793 5.53191511811257 0.542448906438364
44.5549046322703 6.22340450787664 0.575353950284691
44.5751282479614 5.10638318595006 0.521168051529382
44.5953518636525 5.05319169442975 0.518446528742142
44.6155754793435 5.69148959267351 0.550217066626112
44.6357990950346 5.53191511811257 0.542448906438364
44.6560227107257 6.01063854179539 0.565433310857768
44.6762463264167 6.0638300333157 0.567929717304644
44.6964699421078 6.17021301635633 0.572889896348368
44.7166935577989 5.37234064355163 0.534567873881054
44.7369171734899 4.78723423682818 0.504618796037166
44.757140789181 5.53191511811257 0.542448906438364
44.7773644048721 5.37234064355163 0.534567873881054
44.7975880205631 6.38297898243758 0.582683595460406
44.8178116362542 5.21276616899069 0.526568900976162
44.8380352519453 5.00000020290944 0.515710644057907
44.8582588676363 5.10638318595006 0.521168051529382
44.8784824833274 6.11702152483601 0.570415198401908
44.8987060990185 5.21276616899069 0.526568900976162
44.9189297147095 4.68085125378756 0.498980420230782
44.9391533304006 5.85106406723445 0.55787706953872
44.9593769460917 5.00000020290944 0.515710644057907
44.9796005617827 4.52127677922662 0.490401320821245
44.9998241774738 5.47872362659226 0.539834679625181
45.0200477931648 6.11702152483601 0.570415198401908
45.0402714088559 5.69148959267351 0.550217066626112
45.060495024547 4.14893633858443 0.469774533230711
45.080718640238 6.91489389764071 0.606476314558303
45.1009422559291 5.85106406723445 0.55787706953872
45.1211658716202 4.94680871138912 0.512960167678218
45.1413894873112 5.58510660963288 0.545050594776606
45.1616131030023 5.53191511811257 0.542448906438364
45.1818367186934 4.46808528770631 0.487508072438874
45.2020603343844 5.58510660963288 0.545050594776606
45.2222839500755 4.57446827074693 0.493277599565779
45.2425075657666 5.37234064355163 0.534567873881054
45.2627311814576 5.15957467747038 0.523875436249008
45.2829547971487 5.15957467747038 0.523875436249008
45.3031784128398 5.42553213507194 0.537207731288247
45.3234020285308 4.89361721986881 0.510194863610278
45.3436256442219 5.69148959267351 0.550217066626112
45.363849259913 5.15957467747038 0.523875436249008
45.384072875604 5.15957467747038 0.523875436249008
45.4042964912951 4.68085125378756 0.498980420230782
45.4245201069862 4.46808528770631 0.487508072438874
45.4447437226772 5.05319169442975 0.518446528742142
45.4649673383683 6.43617047395789 0.585106406723445
45.4851909540594 4.94680871138912 0.512960167678218
45.5054145697504 4.52127677922662 0.490401320821245
45.5256381854415 5.00000020290944 0.515710644057907
45.5458618011326 5.53191511811257 0.542448906438364
45.5660854168236 5.37234064355163 0.534567873881054
45.5863090325147 5.58510660963288 0.545050594776606
45.6065326482058 4.94680871138912 0.512960167678218
45.6267562638968 5.05319169442975 0.518446528742142
45.6469798795879 5.74468108419382 0.552782195061309
45.667203495279 5.85106406723445 0.55787706953872
45.68742711097 5.31914915203132 0.531914915203132
45.7076507266611 4.68085125378756 0.498980420230782
45.7278743423522 4.89361721986881 0.510194863610278
45.7480979580432 5.15957467747038 0.523875436249008
45.7683215737343 5.6382981011532 0.547639923340591
45.7885451894253 5.58510660963288 0.545050594776606
45.8087688051164 4.46808528770631 0.487508072438874
45.8289924208075 5.05319169442975 0.518446528742142
45.8492160364985 5.37234064355163 0.534567873881054
45.8694396521896 4.73404274530787 0.501807527388583
45.8896632678807 5.00000020290944 0.515710644057907
45.9098868835717 4.78723423682818 0.504618796037166
45.9301104992628 4.94680871138912 0.512960167678218
45.9503341149539 5.6382981011532 0.547639923340591
45.9705577306449 5.37234064355163 0.534567873881054
45.990781346336 5.42553213507194 0.537207731288247
46.0110049620271 5.15957467747038 0.523875436249008
46.0312285777181 4.8404257283485 0.507414489430638
46.0514521934092 5.05319169442975 0.518446528742142
46.0716758091003 4.94680871138912 0.512960167678218
46.0918994247913 5.74468108419382 0.552782195061309
46.1121230404824 5.21276616899069 0.526568900976162
46.1323466561735 5.37234064355163 0.534567873881054
46.1525702718645 5.47872362659226 0.539834679625181
46.1727938875556 6.0638300333157 0.567929717304644
46.1930175032467 5.10638318595006 0.521168051529382
46.2132411189377 5.74468108419382 0.552782195061309
46.2334647346288 5.265957660511 0.529248658236749
46.2536883503199 5.79787257571413 0.555335475138186
46.2739119660109 5.15957467747038 0.523875436249008
46.294135581702 5.42553213507194 0.537207731288247
46.3143591973931 5.31914915203132 0.531914915203132
46.3345828130841 4.41489379618599 0.48459755047143
46.3548064287752 5.10638318595006 0.521168051529382
46.3750300444663 4.73404274530787 0.501807527388583
46.3952536601573 4.8404257283485 0.507414489430638
46.4154772758484 5.21276616899069 0.526568900976162
46.4357008915395 5.53191511811257 0.542448906438364
46.4559245072305 5.85106406723445 0.55787706953872
46.4761481229216 4.8404257283485 0.507414489430638
46.4963717386127 5.10638318595006 0.521168051529382
46.5165953543037 5.10638318595006 0.521168051529382
46.5368189699948 4.78723423682818 0.504618796037166
46.5570425856858 4.46808528770631 0.487508072438874
46.5772662013769 4.57446827074693 0.493277599565779
46.597489817068 5.58510660963288 0.545050594776606
46.617713432759 5.69148959267351 0.550217066626112
46.6379370484501 5.53191511811257 0.542448906438364
46.6581606641412 5.15957467747038 0.523875436249008
46.6783842798322 5.53191511811257 0.542448906438364
46.6986078955233 4.62765976226725 0.49613720380912
46.7188315112144 5.37234064355163 0.534567873881054
46.7390551269054 4.73404274530787 0.501807527388583
46.7592787425965 4.8404257283485 0.507414489430638
46.7795023582876 5.21276616899069 0.526568900976162
46.7997259739786 6.59574494851883 0.59231538178515
46.8199495896697 5.47872362659226 0.539834679625181
46.8401732053608 5.53191511811257 0.542448906438364
46.8603968210518 4.52127677922662 0.490401320821245
46.8806204367429 5.15957467747038 0.523875436249008
46.900844052434 5.37234064355163 0.534567873881054
46.921067668125 5.90425555875476 0.560407137255822
46.9412912838161 5.37234064355163 0.534567873881054
46.9615148995072 5.85106406723445 0.55787706953872
46.9817385151982 6.11702152483601 0.570415198401908
47.0019621308893 5.6382981011532 0.547639923340591
47.0221857465804 5.47872362659226 0.539834679625181
47.0424093622714 5.37234064355163 0.534567873881054
47.0626329779625 5.37234064355163 0.534567873881054
47.0828565936536 5.42553213507194 0.537207731288247
47.1030802093446 6.01063854179539 0.565433310857768
47.1233038250357 5.00000020290944 0.515710644057907
47.1435274407268 5.6382981011532 0.547639923340591
47.1637510564178 4.52127677922662 0.490401320821245
47.1839746721089 4.73404274530787 0.501807527388583
47.2041982878 4.73404274530787 0.501807527388583
47.224421903491 5.31914915203132 0.531914915203132
47.2446455191821 5.74468108419382 0.552782195061309
47.2648691348732 5.31914915203132 0.531914915203132
47.2850927505642 5.53191511811257 0.542448906438364
47.3053163662553 5.74468108419382 0.552782195061309
47.3255399819463 5.10638318595006 0.521168051529382
47.3457635976374 5.31914915203132 0.531914915203132
47.3659872133285 5.15957467747038 0.523875436249008
47.3862108290195 5.15957467747038 0.523875436249008
47.4064344447106 5.15957467747038 0.523875436249008
47.4266580604017 4.25531932162505 0.475759163456095
47.4468816760927 4.57446827074693 0.493277599565779
47.4671052917838 5.58510660963288 0.545050594776606
47.4873289074749 3.93617037250317 0.457570511496874
47.5075525231659 5.53191511811257 0.542448906438364
47.527776138857 4.8404257283485 0.507414489430638
47.5479997545481 5.79787257571413 0.555335475138186
47.5682233702391 5.10638318595006 0.521168051529382
47.5884469859302 5.42553213507194 0.537207731288247
47.6086706016213 6.70212793155946 0.59707301148151
47.6288942173123 4.57446827074693 0.493277599565779
47.6491178330034 4.94680871138912 0.512960167678218
47.6693414486945 5.37234064355163 0.534567873881054
47.6895650643855 5.90425555875476 0.560407137255822
47.7097886800766 5.00000020290944 0.515710644057907
47.7300122957677 5.31914915203132 0.531914915203132
47.7502359114587 5.42553213507194 0.537207731288247
47.7704595271498 5.6382981011532 0.547639923340591
47.7906831428409 5.10638318595006 0.521168051529382
47.8109067585319 4.52127677922662 0.490401320821245
47.831130374223 4.62765976226725 0.49613720380912
47.8513539899141 5.95744705027507 0.562925833709398
47.8715776056051 5.74468108419382 0.552782195061309
47.8918012212962 5.58510660963288 0.545050594776606
47.9120248369873 5.10638318595006 0.521168051529382
47.9322484526783 4.78723423682818 0.504618796037166
47.9524720683694 6.22340450787664 0.575353950284691
47.9726956840605 4.8404257283485 0.507414489430638
47.9929192997515 4.25531932162505 0.475759163456095
48.0131429154426 5.58510660963288 0.545050594776606
48.0333665311337 5.69148959267351 0.550217066626112
48.0535901468247 5.53191511811257 0.542448906438364
48.0738137625158 4.94680871138912 0.512960167678218
48.0940373782068 4.73404274530787 0.501807527388583
48.1142609938979 4.30851081314537 0.478723423682818
48.134484609589 5.42553213507194 0.537207731288247
48.15470822528 6.22340450787664 0.575353950284691
48.1749318409711 5.58510660963288 0.545050594776606
48.1951554566622 4.57446827074693 0.493277599565779
48.2153790723532 4.30851081314537 0.478723423682818
48.2356026880443 4.46808528770631 0.487508072438874
48.2558263037354 5.15957467747038 0.523875436249008
48.2760499194264 4.62765976226725 0.49613720380912
48.2962735351175 4.94680871138912 0.512960167678218
48.3164971508086 4.78723423682818 0.504618796037166
48.3367207664996 5.74468108419382 0.552782195061309
48.3569443821907 5.05319169442975 0.518446528742142
48.3771679978818 4.89361721986881 0.510194863610278
48.3973916135728 5.10638318595006 0.521168051529382
48.4176152292639 4.41489379618599 0.48459755047143
48.437838844955 4.68085125378756 0.498980420230782
48.458062460646 6.01063854179539 0.565433310857768
48.4782860763371 4.73404274530787 0.501807527388583
48.4985096920282 5.90425555875476 0.560407137255822
48.5187333077192 5.10638318595006 0.521168051529382
48.5389569234103 5.265957660511 0.529248658236749
48.5591805391014 3.67021291490161 0.441841712766838
48.5794041547924 5.10638318595006 0.521168051529382
48.5996277704835 4.73404274530787 0.501807527388583
48.6198513861746 5.00000020290944 0.515710644057907
48.6400750018656 4.68085125378756 0.498980420230782
48.6602986175567 5.265957660511 0.529248658236749
48.6805222332478 5.00000020290944 0.515710644057907
48.7007458489388 5.21276616899069 0.526568900976162
48.7209694646299 5.00000020290944 0.515710644057907
48.741193080321 5.90425555875476 0.560407137255822
48.761416696012 3.67021291490161 0.441841712766838
48.7816403117031 5.90425555875476 0.560407137255822
48.8018639273942 5.265957660511 0.529248658236749
48.8220875430852 4.73404274530787 0.501807527388583
48.8423111587763 5.31914915203132 0.531914915203132
48.8625347744673 4.41489379618599 0.48459755047143
48.8827583901584 5.00000020290944 0.515710644057907
48.9029820058495 5.74468108419382 0.552782195061309
48.9232056215405 4.20212783010474 0.472776317979537
48.9434292372316 4.36170230466568 0.481669441788406
48.9636528529227 5.47872362659226 0.539834679625181
48.9838764686137 4.46808528770631 0.487508072438874
49.0041000843048 4.73404274530787 0.501807527388583
49.0243236999959 5.15957467747038 0.523875436249008
49.0445473156869 4.73404274530787 0.501807527388583
49.064770931378 4.52127677922662 0.490401320821245
49.0849945470691 5.37234064355163 0.534567873881054
49.1052181627601 5.90425555875476 0.560407137255822
49.1254417784512 5.69148959267351 0.550217066626112
49.1456653941423 5.10638318595006 0.521168051529382
49.1658890098333 4.8404257283485 0.507414489430638
49.1861126255244 4.94680871138912 0.512960167678218
49.2063362412155 4.14893633858443 0.469774533230711
49.2265598569065 4.78723423682818 0.504618796037166
49.2467834725976 4.94680871138912 0.512960167678218
49.2670070882887 4.8404257283485 0.507414489430638
49.2872307039797 5.37234064355163 0.534567873881054
49.3074543196708 4.52127677922662 0.490401320821245
49.3276779353619 5.85106406723445 0.55787706953872
49.3479015510529 4.8404257283485 0.507414489430638
49.368125166744 4.30851081314537 0.478723423682818
49.3883487824351 5.15957467747038 0.523875436249008
49.4085723981261 4.52127677922662 0.490401320821245
49.4287960138172 5.05319169442975 0.518446528742142
49.4490196295083 4.68085125378756 0.498980420230782
49.4692432451993 5.15957467747038 0.523875436249008
49.4894668608904 4.94680871138912 0.512960167678218
49.5096904765815 5.05319169442975 0.518446528742142
49.5299140922725 5.15957467747038 0.523875436249008
49.5501377079636 6.11702152483601 0.570415198401908
49.5703613236547 4.8404257283485 0.507414489430638
49.5905849393457 5.05319169442975 0.518446528742142
49.6108085550368 5.00000020290944 0.515710644057907
49.6310321707278 3.88297888098286 0.454468302768581
49.6512557864189 4.52127677922662 0.490401320821245
49.67147940211 4.89361721986881 0.510194863610278
49.691703017801 5.10638318595006 0.521168051529382
49.7119266334921 5.00000020290944 0.515710644057907
49.7321502491832 4.09574484706411 0.466753443803018
49.7523738648742 5.00000020290944 0.515710644057907
49.7725974805653 5.31914915203132 0.531914915203132
49.7928210962564 4.68085125378756 0.498980420230782
49.8130447119474 5.15957467747038 0.523875436249008
49.8332683276385 5.47872362659226 0.539834679625181
49.8534919433296 5.37234064355163 0.534567873881054
49.8737155590206 5.53191511811257 0.542448906438364
49.8939391747117 4.52127677922662 0.490401320821245
49.9141627904028 4.30851081314537 0.478723423682818
49.9343864060938 4.94680871138912 0.512960167678218
49.9546100217849 5.10638318595006 0.521168051529382
49.974833637476 4.09574484706411 0.466753443803018
49.995057253167 5.42553213507194 0.537207731288247
50.0152808688581 5.265957660511 0.529248658236749
50.0355044845492 4.62765976226725 0.49613720380912
50.0557281002402 5.05319169442975 0.518446528742142
50.0759517159313 4.78723423682818 0.504618796037166
50.0961753316224 5.21276616899069 0.526568900976162
50.1163989473134 4.62765976226725 0.49613720380912
50.1366225630045 4.68085125378756 0.498980420230782
50.1568461786956 5.10638318595006 0.521168051529382
50.1770697943866 4.68085125378756 0.498980420230782
50.1972934100777 5.58510660963288 0.545050594776606
50.2175170257688 4.36170230466568 0.481669441788406
50.2377406414598 4.57446827074693 0.493277599565779
50.2579642571509 3.29787247425942 0.418830223061378
50.278187872842 5.42553213507194 0.537207731288247
50.298411488533 4.30851081314537 0.478723423682818
50.3186351042241 4.52127677922662 0.490401320821245
50.3388587199152 4.46808528770631 0.487508072438874
50.3590823356062 3.88297888098286 0.454468302768581
50.3793059512973 4.73404274530787 0.501807527388583
50.3995295669883 5.58510660963288 0.545050594776606
50.4197531826794 4.14893633858443 0.469774533230711
50.4399767983705 5.31914915203132 0.531914915203132
50.4602004140615 4.94680871138912 0.512960167678218
50.4804240297526 5.10638318595006 0.521168051529382
50.5006476454437 4.68085125378756 0.498980420230782
50.5208712611347 4.8404257283485 0.507414489430638
50.5410948768258 4.89361721986881 0.510194863610278
50.5613184925169 4.14893633858443 0.469774533230711
50.5815421082079 4.14893633858443 0.469774533230711
50.601765723899 4.89361721986881 0.510194863610278
50.6219893395901 5.10638318595006 0.521168051529382
50.6422129552811 4.73404274530787 0.501807527388583
50.6624365709722 4.14893633858443 0.469774533230711
50.6826601866633 4.57446827074693 0.493277599565779
50.7028838023543 5.05319169442975 0.518446528742142
50.7231074180454 5.265957660511 0.529248658236749
50.7433310337365 5.58510660963288 0.545050594776606
50.7635546494275 5.05319169442975 0.518446528742142
50.7837782651186 4.68085125378756 0.498980420230782
50.8040018808097 4.30851081314537 0.478723423682818
50.8242254965007 6.01063854179539 0.565433310857768
50.8444491121918 5.10638318595006 0.521168051529382
50.8646727278829 4.73404274530787 0.501807527388583
50.8848963435739 4.30851081314537 0.478723423682818
50.905119959265 4.36170230466568 0.481669441788406
50.9253435749561 4.14893633858443 0.469774533230711
50.9455671906471 5.37234064355163 0.534567873881054
50.9657908063382 4.94680871138912 0.512960167678218
50.9860144220293 5.00000020290944 0.515710644057907
51.0062380377203 4.0425533555438 0.463712672386492
51.0264616534114 5.6382981011532 0.547639923340591
51.0466852691025 4.41489379618599 0.48459755047143
51.0669088847935 4.78723423682818 0.504618796037166
51.0871325004846 4.25531932162505 0.475759163456095
51.1073561161757 4.94680871138912 0.512960167678218
51.1275797318667 5.265957660511 0.529248658236749
51.1478033475578 4.78723423682818 0.504618796037166
51.1680269632488 4.36170230466568 0.481669441788406
51.1882505789399 4.89361721986881 0.510194863610278
51.208474194631 4.57446827074693 0.493277599565779
51.228697810322 4.78723423682818 0.504618796037166
51.2489214260131 4.30851081314537 0.478723423682818
51.2691450417042 4.8404257283485 0.507414489430638
51.2893686573952 3.82978738946255 0.451344772265282
51.3095922730863 3.6170214233813 0.438628275844795
51.3298158887774 5.05319169442975 0.518446528742142
51.3500395044684 4.94680871138912 0.512960167678218
51.3702631201595 4.62765976226725 0.49613720380912
51.3904867358506 4.62765976226725 0.49613720380912
51.4107103515416 4.41489379618599 0.48459755047143
51.4309339672327 4.78723423682818 0.504618796037166
51.4511575829238 5.00000020290944 0.515710644057907
51.4713811986148 4.52127677922662 0.490401320821245
51.4916048143059 3.82978738946255 0.451344772265282
51.511828429997 4.8404257283485 0.507414489430638
51.532052045688 4.62765976226725 0.49613720380912
51.5522756613791 5.10638318595006 0.521168051529382
51.5724992770702 4.41489379618599 0.48459755047143
51.5927228927612 3.82978738946255 0.451344772265282
51.6129465084523 3.93617037250317 0.457570511496874
51.6331701241434 5.00000020290944 0.515710644057907
51.6533937398344 5.31914915203132 0.531914915203132
51.6736173555255 5.15957467747038 0.523875436249008
51.6938409712166 5.00000020290944 0.515710644057907
51.7140645869076 3.88297888098286 0.454468302768581
51.7342882025987 4.20212783010474 0.472776317979537
51.7545118182898 4.36170230466568 0.481669441788406
51.7747354339808 4.09574484706411 0.466753443803018
51.7949590496719 4.57446827074693 0.493277599565779
51.815182665363 4.62765976226725 0.49613720380912
51.835406281054 4.68085125378756 0.498980420230782
51.8556298967451 5.10638318595006 0.521168051529382
51.8758535124362 5.05319169442975 0.518446528742142
51.8960771281272 4.52127677922662 0.490401320821245
51.9163007438183 4.30851081314537 0.478723423682818
51.9365243595093 3.35106396577973 0.422194375282049
51.9567479752004 4.14893633858443 0.469774533230711
51.9769715908915 4.57446827074693 0.493277599565779
51.9971952065825 5.05319169442975 0.518446528742142
52.0174188222736 4.73404274530787 0.501807527388583
52.0376424379647 4.8404257283485 0.507414489430638
52.0578660536557 4.25531932162505 0.475759163456095
52.0780896693468 4.09574484706411 0.466753443803018
52.0983132850379 5.15957467747038 0.523875436249008
52.1185369007289 4.78723423682818 0.504618796037166
52.13876051642 4.73404274530787 0.501807527388583
52.1589841321111 4.36170230466568 0.481669441788406
52.1792077478021 4.46808528770631 0.487508072438874
52.1994313634932 3.72340440642192 0.445031947067723
52.2196549791843 4.94680871138912 0.512960167678218
52.2398785948753 4.41489379618599 0.48459755047143
52.2601022105664 5.15957467747038 0.523875436249008
52.2803258262575 5.58510660963288 0.545050594776606
52.3005494419485 5.74468108419382 0.552782195061309
52.3207730576396 4.68085125378756 0.498980420230782
52.3409966733307 5.05319169442975 0.518446528742142
52.3612202890217 5.10638318595006 0.521168051529382
52.3814439047128 4.8404257283485 0.507414489430638
52.4016675204039 4.89361721986881 0.510194863610278
52.4218911360949 4.41489379618599 0.48459755047143
52.442114751786 3.77659589794223 0.448199474208799
52.4623383674771 4.41489379618599 0.48459755047143
52.4825619831681 3.77659589794223 0.448199474208799
52.5027855988592 5.10638318595006 0.521168051529382
52.5230092145503 5.15957467747038 0.523875436249008
52.5432328302413 4.25531932162505 0.475759163456095
52.5634564459324 3.67021291490161 0.441841712766838
52.5836800616235 3.77659589794223 0.448199474208799
52.6039036773145 4.41489379618599 0.48459755047143
52.6241272930056 5.21276616899069 0.526568900976162
52.6443509086967 5.15957467747038 0.523875436249008
52.6645745243877 4.52127677922662 0.490401320821245
52.6847981400788 4.36170230466568 0.481669441788406
52.7050217557698 4.68085125378756 0.498980420230782
52.7252453714609 4.8404257283485 0.507414489430638
52.745468987152 4.30851081314537 0.478723423682818
52.765692602843 4.20212783010474 0.472776317979537
52.7859162185341 5.05319169442975 0.518446528742142
52.8061398342252 4.30851081314537 0.478723423682818
52.8263634499162 4.52127677922662 0.490401320821245
52.8465870656073 4.68085125378756 0.498980420230782
52.8668106812984 4.20212783010474 0.472776317979537
52.8870342969894 4.68085125378756 0.498980420230782
52.9072579126805 5.47872362659226 0.539834679625181
52.9274815283716 4.09574484706411 0.466753443803018
52.9477051440626 4.62765976226725 0.49613720380912
52.9679287597537 4.41489379618599 0.48459755047143
52.9881523754448 5.69148959267351 0.550217066626112
53.0083759911358 4.52127677922662 0.490401320821245
53.0285996068269 4.14893633858443 0.469774533230711
53.048823222518 4.78723423682818 0.504618796037166
53.069046838209 4.0425533555438 0.463712672386492
53.0892704539001 4.78723423682818 0.504618796037166
53.1094940695912 4.8404257283485 0.507414489430638
53.1297176852822 4.68085125378756 0.498980420230782
53.1499413009733 5.00000020290944 0.515710644057907
53.1701649166644 4.89361721986881 0.510194863610278
53.1903885323554 4.94680871138912 0.512960167678218
53.2106121480465 4.8404257283485 0.507414489430638
53.2308357637376 5.05319169442975 0.518446528742142
53.2510593794286 4.36170230466568 0.481669441788406
53.2712829951197 5.10638318595006 0.521168051529382
53.2915066108108 4.0425533555438 0.463712672386492
53.3117302265018 4.46808528770631 0.487508072438874
53.3319538421929 5.00000020290944 0.515710644057907
53.352177457884 5.00000020290944 0.515710644057907
53.372401073575 6.01063854179539 0.565433310857768
53.3926246892661 4.89361721986881 0.510194863610278
53.4128483049572 4.0425533555438 0.463712672386492
53.4330719206482 5.42553213507194 0.537207731288247
53.4532955363393 4.36170230466568 0.481669441788406
53.4735191520303 5.21276616899069 0.526568900976162
53.4937427677214 5.00000020290944 0.515710644057907
53.5139663834125 5.00000020290944 0.515710644057907
53.5341899991035 4.68085125378756 0.498980420230782
53.5544136147946 4.52127677922662 0.490401320821245
53.5746372304857 4.8404257283485 0.507414489430638
53.5948608461767 4.36170230466568 0.481669441788406
53.6150844618678 4.89361721986881 0.510194863610278
53.6353080775589 5.05319169442975 0.518446528742142
53.6555316932499 5.47872362659226 0.539834679625181
53.675755308941 4.36170230466568 0.481669441788406
53.6959789246321 4.57446827074693 0.493277599565779
53.7162025403231 3.98936186402349 0.460651829217758
53.7364261560142 5.00000020290944 0.515710644057907
53.7566497717053 5.42553213507194 0.537207731288247
53.7768733873963 4.89361721986881 0.510194863610278
53.7970970030874 5.10638318595006 0.521168051529382
53.8173206187785 5.15957467747038 0.523875436249008
53.8375442344695 3.98936186402349 0.460651829217758
53.8577678501606 4.25531932162505 0.475759163456095
53.8779914658517 4.41489379618599 0.48459755047143
53.8982150815427 4.20212783010474 0.472776317979537
53.9184386972338 3.98936186402349 0.460651829217758
53.9386623129249 4.89361721986881 0.510194863610278
53.9588859286159 4.73404274530787 0.501807527388583
53.979109544307 5.00000020290944 0.515710644057907
53.9993331599981 4.94680871138912 0.512960167678218
54.0195567756891 4.30851081314537 0.478723423682818
54.0397803913802 4.78723423682818 0.504618796037166
54.0600040070713 4.41489379618599 0.48459755047143
54.0802276227623 4.94680871138912 0.512960167678218
54.1004512384534 4.52127677922662 0.490401320821245
54.1206748541445 4.52127677922662 0.490401320821245
54.1408984698355 4.57446827074693 0.493277599565779
54.1611220855266 4.09574484706411 0.466753443803018
54.1813457012177 4.68085125378756 0.498980420230782
54.2015693169087 5.00000020290944 0.515710644057907
54.2217929325998 4.25531932162505 0.475759163456095
54.2420165482908 4.68085125378756 0.498980420230782
54.2622401639819 4.36170230466568 0.481669441788406
54.282463779673 4.68085125378756 0.498980420230782
54.302687395364 4.36170230466568 0.481669441788406
54.3229110110551 4.57446827074693 0.493277599565779
54.3431346267462 4.09574484706411 0.466753443803018
54.3633582424372 4.20212783010474 0.472776317979537
54.3835818581283 4.09574484706411 0.466753443803018
54.4038054738194 4.62765976226725 0.49613720380912
54.4240290895104 5.42553213507194 0.537207731288247
54.4442527052015 5.69148959267351 0.550217066626112
54.4644763208926 3.6170214233813 0.438628275844795
54.4846999365836 4.36170230466568 0.481669441788406
54.5049235522747 3.82978738946255 0.451344772265282
54.5251471679658 4.36170230466568 0.481669441788406
54.5453707836568 4.8404257283485 0.507414489430638
54.5655943993479 4.94680871138912 0.512960167678218
54.585818015039 5.00000020290944 0.515710644057907
54.60604163073 4.73404274530787 0.501807527388583
54.6262652464211 4.30851081314537 0.478723423682818
54.6464888621122 4.62765976226725 0.49613720380912
54.6667124778032 4.46808528770631 0.487508072438874
54.6869360934943 4.68085125378756 0.498980420230782
54.7071597091854 4.0425533555438 0.463712672386492
54.7273833248764 4.52127677922662 0.490401320821245
54.7476069405675 4.68085125378756 0.498980420230782
54.7678305562586 4.36170230466568 0.481669441788406
54.7880541719496 4.52127677922662 0.490401320821245
54.8082777876407 5.10638318595006 0.521168051529382
54.8285014033318 4.14893633858443 0.469774533230711
54.8487250190228 5.10638318595006 0.521168051529382
54.8689486347139 4.25531932162505 0.475759163456095
54.889172250405 4.57446827074693 0.493277599565779
54.909395866096 5.31914915203132 0.531914915203132
54.9296194817871 4.36170230466568 0.481669441788406
54.9498430974782 4.68085125378756 0.498980420230782
54.9700667131692 4.57446827074693 0.493277599565779
54.9902903288603 4.36170230466568 0.481669441788406
55.0105139445513 4.62765976226725 0.49613720380912
55.0307375602424 4.46808528770631 0.487508072438874
55.0509611759335 4.57446827074693 0.493277599565779
55.0711847916245 4.57446827074693 0.493277599565779
55.0914084073156 4.73404274530787 0.501807527388583
55.1116320230067 4.36170230466568 0.481669441788406
55.1318556386977 3.40425545730004 0.425531932162505
55.1520792543888 4.14893633858443 0.469774533230711
55.1723028700799 4.94680871138912 0.512960167678218
55.1925264857709 4.73404274530787 0.501807527388583
55.212750101462 4.30851081314537 0.478723423682818
55.2329737171531 4.52127677922662 0.490401320821245
55.2531973328441 4.25531932162505 0.475759163456095
55.2734209485352 4.0425533555438 0.463712672386492
55.2936445642263 3.77659589794223 0.448199474208799
55.3138681799173 4.20212783010474 0.472776317979537
55.3340917956084 4.30851081314537 0.478723423682818
55.3543154112995 4.73404274530787 0.501807527388583
55.3745390269905 4.09574484706411 0.466753443803018
55.3947626426816 4.30851081314537 0.478723423682818
55.4149862583727 4.78723423682818 0.504618796037166
55.4352098740637 4.94680871138912 0.512960167678218
55.4554334897548 4.25531932162505 0.475759163456095
55.4756571054459 4.36170230466568 0.481669441788406
55.4958807211369 4.0425533555438 0.463712672386492
55.516104336828 4.46808528770631 0.487508072438874
55.5363279525191 4.41489379618599 0.48459755047143
55.5565515682101 4.14893633858443 0.469774533230711
55.5767751839012 4.52127677922662 0.490401320821245
55.5969987995923 4.89361721986881 0.510194863610278
55.6172224152833 3.40425545730004 0.425531932162505
55.6374460309744 4.30851081314537 0.478723423682818
55.6576696466655 4.94680871138912 0.512960167678218
55.6778932623565 4.94680871138912 0.512960167678218
55.6981168780476 4.30851081314537 0.478723423682818
55.7183404937387 4.30851081314537 0.478723423682818
55.7385641094297 4.30851081314537 0.478723423682818
55.7587877251208 4.52127677922662 0.490401320821245
55.7790113408118 3.67021291490161 0.441841712766838
55.7992349565029 5.00000020290944 0.515710644057907
55.819458572194 4.41489379618599 0.48459755047143
55.839682187885 3.40425545730004 0.425531932162505
55.8599058035761 4.73404274530787 0.501807527388583
55.8801294192672 3.77659589794223 0.448199474208799
55.9003530349582 4.25531932162505 0.475759163456095
55.9205766506493 4.52127677922662 0.490401320821245
55.9408002663404 4.94680871138912 0.512960167678218
55.9610238820314 4.68085125378756 0.498980420230782
55.9812474977225 4.0425533555438 0.463712672386492
56.0014711134136 4.09574484706411 0.466753443803018
56.0216947291046 4.89361721986881 0.510194863610278
56.0419183447957 4.52127677922662 0.490401320821245
56.0621419604868 3.88297888098286 0.454468302768581
56.0823655761778 4.14893633858443 0.469774533230711
56.1025891918689 5.05319169442975 0.518446528742142
56.12281280756 5.05319169442975 0.518446528742142
56.143036423251 4.30851081314537 0.478723423682818
56.1632600389421 4.09574484706411 0.466753443803018
56.1834836546332 4.62765976226725 0.49613720380912
56.2037072703242 3.98936186402349 0.460651829217758
56.2239308860153 4.14893633858443 0.469774533230711
56.2441545017064 4.0425533555438 0.463712672386492
56.2643781173974 3.98936186402349 0.460651829217758
56.2846017330885 4.41489379618599 0.48459755047143
56.3048253487796 4.46808528770631 0.487508072438874
56.3250489644706 4.8404257283485 0.507414489430638
56.3452725801617 5.10638318595006 0.521168051529382
56.3654961958528 4.36170230466568 0.481669441788406
56.3857198115438 4.8404257283485 0.507414489430638
56.4059434272349 4.20212783010474 0.472776317979537
56.426167042926 4.73404274530787 0.501807527388583
56.446390658617 4.73404274530787 0.501807527388583
56.4666142743081 5.15957467747038 0.523875436249008
56.4868378899992 4.89361721986881 0.510194863610278
56.5070615056902 4.09574484706411 0.466753443803018
56.5272851213813 4.09574484706411 0.466753443803018
56.5475087370723 4.36170230466568 0.481669441788406
56.5677323527634 5.6382981011532 0.547639923340591
56.5879559684545 4.73404274530787 0.501807527388583
56.6081795841455 4.8404257283485 0.507414489430638
56.6284031998366 5.21276616899069 0.526568900976162
56.6486268155277 4.36170230466568 0.481669441788406
56.6688504312187 5.21276616899069 0.526568900976162
56.6890740469098 4.57446827074693 0.493277599565779
56.7092976626009 5.05319169442975 0.518446528742142
56.7295212782919 5.10638318595006 0.521168051529382
56.749744893983 3.67021291490161 0.441841712766838
56.7699685096741 4.57446827074693 0.493277599565779
56.7901921253651 5.42553213507194 0.537207731288247
56.8104157410562 5.37234064355163 0.534567873881054
56.8306393567473 5.21276616899069 0.526568900976162
56.8508629724383 5.00000020290944 0.515710644057907
56.8710865881294 5.00000020290944 0.515710644057907
56.8913102038205 4.46808528770631 0.487508072438874
56.9115338195115 5.85106406723445 0.55787706953872
56.9317574352026 4.89361721986881 0.510194863610278
56.9519810508937 5.15957467747038 0.523875436249008
56.9722046665847 6.01063854179539 0.565433310857768
56.9924282822758 5.31914915203132 0.531914915203132
57.0126518979669 5.21276616899069 0.526568900976162
57.0328755136579 5.37234064355163 0.534567873881054
57.053099129349 5.42553213507194 0.537207731288247
57.0733227450401 5.69148959267351 0.550217066626112
57.0935463607311 6.0638300333157 0.567929717304644
57.1137699764222 5.265957660511 0.529248658236749
57.1339935921133 4.68085125378756 0.498980420230782
57.1542172078043 5.05319169442975 0.518446528742142
57.1744408234954 5.31914915203132 0.531914915203132
57.1946644391865 4.73404274530787 0.501807527388583
57.2148880548775 4.94680871138912 0.512960167678218
57.2351116705686 5.31914915203132 0.531914915203132
57.2553352862597 5.10638318595006 0.521168051529382
57.2755589019507 4.68085125378756 0.498980420230782
57.2957825176418 5.15957467747038 0.523875436249008
57.3160061333328 4.8404257283485 0.507414489430638
57.3362297490239 5.15957467747038 0.523875436249008
57.356453364715 5.05319169442975 0.518446528742142
57.376676980406 4.78723423682818 0.504618796037166
57.3969005960971 4.52127677922662 0.490401320821245
57.4171242117882 4.8404257283485 0.507414489430638
57.4373478274792 5.37234064355163 0.534567873881054
57.4575714431703 4.8404257283485 0.507414489430638
57.4777950588614 5.05319169442975 0.518446528742142
57.4980186745524 4.89361721986881 0.510194863610278
57.5182422902435 4.68085125378756 0.498980420230782
57.5384659059346 5.15957467747038 0.523875436249008
57.5586895216256 4.52127677922662 0.490401320821245
57.5789131373167 5.6382981011532 0.547639923340591
57.5991367530078 4.78723423682818 0.504618796037166
57.6193603686988 4.94680871138912 0.512960167678218
57.6395839843899 4.94680871138912 0.512960167678218
57.659807600081 5.05319169442975 0.518446528742142
57.680031215772 4.78723423682818 0.504618796037166
57.7002548314631 4.68085125378756 0.498980420230782
57.7204784471542 4.41489379618599 0.48459755047143
57.7407020628452 4.62765976226725 0.49613720380912
57.7609256785363 3.93617037250317 0.457570511496874
57.7811492942274 4.52127677922662 0.490401320821245
57.8013729099184 4.68085125378756 0.498980420230782
57.8215965256095 4.30851081314537 0.478723423682818
57.8418201413006 5.05319169442975 0.518446528742142
57.8620437569916 4.46808528770631 0.487508072438874
57.8822673726827 3.93617037250317 0.457570511496874
57.9024909883738 4.20212783010474 0.472776317979537
57.9227146040648 4.09574484706411 0.466753443803018
57.9429382197559 4.25531932162505 0.475759163456095
57.963161835447 4.62765976226725 0.49613720380912
57.983385451138 5.00000020290944 0.515710644057907
58.0036090668291 4.73404274530787 0.501807527388583
58.0238326825202 4.89361721986881 0.510194863610278
58.0440562982112 5.00000020290944 0.515710644057907
58.0642799139023 4.14893633858443 0.469774533230711
58.0845035295933 3.35106396577973 0.422194375282049
58.1047271452844 4.09574484706411 0.466753443803018
58.1249507609755 4.14893633858443 0.469774533230711
58.1451743766665 3.72340440642192 0.445031947067723
58.1653979923576 4.09574484706411 0.466753443803018
58.1856216080487 4.0425533555438 0.463712672386492
58.2058452237397 5.15957467747038 0.523875436249008
58.2260688394308 4.14893633858443 0.469774533230711
58.2462924551219 4.20212783010474 0.472776317979537
58.2665160708129 4.36170230466568 0.481669441788406
58.286739686504 4.25531932162505 0.475759163456095
58.3069633021951 3.6170214233813 0.438628275844795
58.3271869178861 4.68085125378756 0.498980420230782
58.3474105335772 3.77659589794223 0.448199474208799
58.3676341492683 4.62765976226725 0.49613720380912
58.3878577649593 4.78723423682818 0.504618796037166
58.4080813806504 4.41489379618599 0.48459755047143
58.4283049963415 4.57446827074693 0.493277599565779
58.4485286120325 3.98936186402349 0.460651829217758
58.4687522277236 4.0425533555438 0.463712672386492
58.4889758434147 4.73404274530787 0.501807527388583
58.5091994591057 4.41489379618599 0.48459755047143
58.5294230747968 4.41489379618599 0.48459755047143
58.5496466904879 3.72340440642192 0.445031947067723
58.5698703061789 5.10638318595006 0.521168051529382
58.59009392187 4.46808528770631 0.487508072438874
58.6103175375611 4.0425533555438 0.463712672386492
58.6305411532521 3.98936186402349 0.460651829217758
58.6507647689432 4.30851081314537 0.478723423682818
58.6709883846343 4.57446827074693 0.493277599565779
58.6912120003253 4.09574484706411 0.466753443803018
58.7114356160164 3.98936186402349 0.460651829217758
58.7316592317075 4.46808528770631 0.487508072438874
58.7518828473985 4.09574484706411 0.466753443803018
58.7721064630896 3.67021291490161 0.441841712766838
58.7923300787807 3.72340440642192 0.445031947067723
58.8125536944717 3.98936186402349 0.460651829217758
58.8327773101628 4.41489379618599 0.48459755047143
58.8530009258538 3.77659589794223 0.448199474208799
58.8732245415449 3.98936186402349 0.460651829217758
58.893448157236 3.45744694882036 0.428843514653201
58.913671772927 3.40425545730004 0.425531932162505
58.9338953886181 3.93617037250317 0.457570511496874
58.9541190043092 3.88297888098286 0.454468302768581
58.9743426200002 3.82978738946255 0.451344772265282
58.9945662356913 3.98936186402349 0.460651829217758
59.0147898513824 4.73404274530787 0.501807527388583
59.0350134670734 3.45744694882036 0.428843514653201
59.0552370827645 3.98936186402349 0.460651829217758
59.0754606984556 4.52127677922662 0.490401320821245
59.0956843141466 3.72340440642192 0.445031947067723
59.1159079298377 3.88297888098286 0.454468302768581
59.1361315455288 3.6170214233813 0.438628275844795
59.1563551612198 3.40425545730004 0.425531932162505
59.1765787769109 4.25531932162505 0.475759163456095
59.196802392602 3.45744694882036 0.428843514653201
59.217026008293 4.36170230466568 0.481669441788406
59.2372496239841 4.57446827074693 0.493277599565779
59.2574732396752 3.98936186402349 0.460651829217758
59.2776968553662 4.89361721986881 0.510194863610278
59.2979204710573 4.30851081314537 0.478723423682818
59.3181440867484 3.56382993186098 0.435391122555825
59.3383677024394 3.72340440642192 0.445031947067723
59.3585913181305 3.67021291490161 0.441841712766838
59.3788149338216 3.98936186402349 0.460651829217758
59.3990385495126 4.14893633858443 0.469774533230711
59.4192621652037 4.14893633858443 0.469774533230711
59.4394857808948 3.67021291490161 0.441841712766838
59.4597093965858 4.14893633858443 0.469774533230711
59.4799330122769 3.77659589794223 0.448199474208799
59.500156627968 3.93617037250317 0.457570511496874
59.520380243659 3.67021291490161 0.441841712766838
59.5406038593501 3.45744694882036 0.428843514653201
59.5608274750412 3.40425545730004 0.425531932162505
59.5810510907322 3.82978738946255 0.451344772265282
59.6012747064233 4.09574484706411 0.466753443803018
59.6214983221143 3.72340440642192 0.445031947067723
59.6417219378054 4.57446827074693 0.493277599565779
59.6619455534965 3.93617037250317 0.457570511496874
59.6821691691875 3.56382993186098 0.435391122555825
59.7023927848786 3.77659589794223 0.448199474208799
59.7226164005697 5.10638318595006 0.521168051529382
59.7428400162607 3.29787247425942 0.418830223061378
59.7630636319518 4.30851081314537 0.478723423682818
59.7832872476429 3.6170214233813 0.438628275844795
59.8035108633339 4.09574484706411 0.466753443803018
59.823734479025 3.08510650817816 0.405094330581189
59.8439580947161 4.09574484706411 0.466753443803018
59.8641817104071 3.19148949121879 0.412019521636212
59.8844053260982 3.88297888098286 0.454468302768581
59.9046289417893 3.88297888098286 0.454468302768581
59.9248525574803 4.09574484706411 0.466753443803018
59.9450761731714 4.89361721986881 0.510194863610278
59.9652997888625 4.14893633858443 0.469774533230711
59.9855234045535 4.14893633858443 0.469774533230711
60.0057470202446 3.72340440642192 0.445031947067723
60.0259706359357 4.09574484706411 0.466753443803018
60.0461942516267 4.41489379618599 0.48459755047143
60.0664178673178 3.72340440642192 0.445031947067723
60.0866414830089 4.20212783010474 0.472776317979537
60.1068650986999 3.6170214233813 0.438628275844795
60.127088714391 4.36170230466568 0.481669441788406
60.1473123300821 4.20212783010474 0.472776317979537
60.1675359457731 4.46808528770631 0.487508072438874
60.1877595614642 4.25531932162505 0.475759163456095
60.2079831771553 4.30851081314537 0.478723423682818
60.2282067928463 3.88297888098286 0.454468302768581
60.2484304085374 4.52127677922662 0.490401320821245
60.2686540242285 4.89361721986881 0.510194863610278
60.2888776399195 3.98936186402349 0.460651829217758
60.3091012556106 4.09574484706411 0.466753443803018
60.3293248713017 3.2446809827391 0.415438829407517
60.3495484869927 4.36170230466568 0.481669441788406
60.3697721026838 3.72340440642192 0.445031947067723
60.3899957183748 4.09574484706411 0.466753443803018
60.4102193340659 4.8404257283485 0.507414489430638
60.430442949757 3.2446809827391 0.415438829407517
60.450666565448 4.68085125378756 0.498980420230782
60.4708901811391 3.82978738946255 0.451344772265282
60.4911137968302 4.41489379618599 0.48459755047143
60.5113374125212 4.46808528770631 0.487508072438874
60.5315610282123 3.2446809827391 0.415438829407517
60.5517846439034 4.0425533555438 0.463712672386492
60.5720082595944 4.68085125378756 0.498980420230782
60.5922318752855 3.67021291490161 0.441841712766838
60.6124554909766 4.68085125378756 0.498980420230782
60.6326791066676 4.36170230466568 0.481669441788406
60.6529027223587 4.14893633858443 0.469774533230711
60.6731263380498 3.93617037250317 0.457570511496874
60.6933499537408 3.98936186402349 0.460651829217758
60.7135735694319 3.98936186402349 0.460651829217758
60.733797185123 4.14893633858443 0.469774533230711
60.754020800814 4.20212783010474 0.472776317979537
60.7742444165051 4.25531932162505 0.475759163456095
60.7944680321962 3.98936186402349 0.460651829217758
60.8146916478872 4.25531932162505 0.475759163456095
60.8349152635783 4.57446827074693 0.493277599565779
60.8551388792694 3.98936186402349 0.460651829217758
60.8753624949604 4.30851081314537 0.478723423682818
60.8955861106515 3.72340440642192 0.445031947067723
60.9158097263426 3.93617037250317 0.457570511496874
60.9360333420336 4.52127677922662 0.490401320821245
60.9562569577247 3.93617037250317 0.457570511496874
60.9764805734158 4.73404274530787 0.501807527388583
60.9967041891068 3.67021291490161 0.441841712766838
61.0169278047979 3.67021291490161 0.441841712766838
61.037151420489 3.56382993186098 0.435391122555825
61.05737503618 3.82978738946255 0.451344772265282
61.0775986518711 3.51063844034067 0.432129719910892
61.0978222675622 3.51063844034067 0.432129719910892
61.1180458832532 4.30851081314537 0.478723423682818
61.1382694989443 4.09574484706411 0.466753443803018
61.1584931146353 3.98936186402349 0.460651829217758
61.1787167303264 4.0425533555438 0.463712672386492
61.1989403460175 3.67021291490161 0.441841712766838
61.2191639617085 3.98936186402349 0.460651829217758
61.2393875773996 3.67021291490161 0.441841712766838
61.2596111930907 3.72340440642192 0.445031947067723
61.2798348087817 3.77659589794223 0.448199474208799
61.3000584244728 4.30851081314537 0.478723423682818
61.3202820401639 3.56382993186098 0.435391122555825
61.3405056558549 3.35106396577973 0.422194375282049
61.360729271546 4.20212783010474 0.472776317979537
61.3809528872371 4.14893633858443 0.469774533230711
61.4011765029281 3.98936186402349 0.460651829217758
61.4214001186192 3.72340440642192 0.445031947067723
61.4416237343103 4.36170230466568 0.481669441788406
61.4618473500013 4.36170230466568 0.481669441788406
61.4820709656924 3.67021291490161 0.441841712766838
61.5022945813835 4.20212783010474 0.472776317979537
61.5225181970745 4.36170230466568 0.481669441788406
61.5427418127656 4.41489379618599 0.48459755047143
61.5629654284567 3.98936186402349 0.460651829217758
61.5831890441477 3.93617037250317 0.457570511496874
61.6034126598388 4.30851081314537 0.478723423682818
61.6236362755299 3.98936186402349 0.460651829217758
61.6438598912209 3.77659589794223 0.448199474208799
61.664083506912 5.31914915203132 0.531914915203132
61.6843071226031 3.67021291490161 0.441841712766838
61.7045307382941 3.82978738946255 0.451344772265282
61.7247543539852 4.41489379618599 0.48459755047143
61.7449779696763 3.51063844034067 0.432129719910892
61.7652015853673 3.40425545730004 0.425531932162505
61.7854252010584 3.67021291490161 0.441841712766838
61.8056488167495 4.62765976226725 0.49613720380912
61.8258724324405 4.36170230466568 0.481669441788406
61.8460960481316 4.52127677922662 0.490401320821245
61.8663196638227 4.30851081314537 0.478723423682818
61.8865432795137 3.72340440642192 0.445031947067723
61.9067668952048 3.6170214233813 0.438628275844795
61.9269905108958 4.68085125378756 0.498980420230782
61.9472141265869 4.0425533555438 0.463712672386492
61.967437742278 4.36170230466568 0.481669441788406
61.987661357969 3.72340440642192 0.445031947067723
62.0078849736601 4.57446827074693 0.493277599565779
62.0281085893512 3.2446809827391 0.415438829407517
62.0483322050422 4.25531932162505 0.475759163456095
62.0685558207333 3.98936186402349 0.460651829217758
62.0887794364244 3.77659589794223 0.448199474208799
62.1090030521154 4.68085125378756 0.498980420230782
62.1292266678065 3.40425545730004 0.425531932162505
62.1494502834976 4.62765976226725 0.49613720380912
62.1696738991886 4.46808528770631 0.487508072438874
62.1898975148797 4.94680871138912 0.512960167678218
62.2101211305708 4.09574484706411 0.466753443803018
62.2303447462618 5.265957660511 0.529248658236749
62.2505683619529 4.41489379618599 0.48459755047143
62.270791977644 3.98936186402349 0.460651829217758
62.291015593335 5.37234064355163 0.534567873881054
62.3112392090261 5.42553213507194 0.537207731288247
62.3314628247172 5.31914915203132 0.531914915203132
62.3516864404082 5.53191511811257 0.542448906438364
62.3719100560993 4.41489379618599 0.48459755047143
62.3921336717904 4.62765976226725 0.49613720380912
62.4123572874814 5.90425555875476 0.560407137255822
62.4325809031725 4.36170230466568 0.481669441788406
62.4528045188636 4.73404274530787 0.501807527388583
62.4730281345546 4.68085125378756 0.498980420230782
62.4932517502457 5.6382981011532 0.547639923340591
62.5134753659368 5.90425555875476 0.560407137255822
62.5336989816278 5.85106406723445 0.55787706953872
62.5539225973189 5.85106406723445 0.55787706953872
62.57414621301 4.52127677922662 0.490401320821245
62.594369828701 5.90425555875476 0.560407137255822
62.6145934443921 5.6382981011532 0.547639923340591
62.6348170600832 5.95744705027507 0.562925833709398
62.6550406757742 5.31914915203132 0.531914915203132
62.6752642914653 5.37234064355163 0.534567873881054
62.6954879071563 5.265957660511 0.529248658236749
62.7157115228474 5.74468108419382 0.552782195061309
62.7359351385385 6.11702152483601 0.570415198401908
62.7561587542295 5.95744705027507 0.562925833709398
62.7763823699206 5.265957660511 0.529248658236749
62.7966059856117 5.15957467747038 0.523875436249008
62.8168296013027 4.73404274530787 0.501807527388583
62.8370532169938 4.8404257283485 0.507414489430638
62.8572768326849 4.68085125378756 0.498980420230782
62.8775004483759 6.0638300333157 0.567929717304644
62.897724064067 4.8404257283485 0.507414489430638
62.9179476797581 4.73404274530787 0.501807527388583
62.9381712954491 4.68085125378756 0.498980420230782
62.9583949111402 5.15957467747038 0.523875436249008
62.9786185268313 4.25531932162505 0.475759163456095
62.9988421425223 5.85106406723445 0.55787706953872
63.0190657582134 5.00000020290944 0.515710644057907
63.0392893739045 5.265957660511 0.529248658236749
63.0595129895955 4.62765976226725 0.49613720380912
63.0797366052866 5.05319169442975 0.518446528742142
63.0999602209777 4.46808528770631 0.487508072438874
63.1201838366687 4.36170230466568 0.481669441788406
63.1404074523598 4.8404257283485 0.507414489430638
63.1606310680509 4.0425533555438 0.463712672386492
63.1808546837419 3.88297888098286 0.454468302768581
63.201078299433 4.25531932162505 0.475759163456095
63.2213019151241 3.88297888098286 0.454468302768581
63.2415255308151 5.10638318595006 0.521168051529382
63.2617491465062 4.30851081314537 0.478723423682818
63.2819727621973 5.00000020290944 0.515710644057907
63.3021963778883 4.73404274530787 0.501807527388583
63.3224199935794 3.77659589794223 0.448199474208799
63.3426436092705 4.57446827074693 0.493277599565779
63.3628672249615 3.67021291490161 0.441841712766838
63.3830908406526 4.62765976226725 0.49613720380912
63.4033144563437 3.45744694882036 0.428843514653201
63.4235380720347 3.6170214233813 0.438628275844795
63.4437616877258 3.72340440642192 0.445031947067723
63.4639853034168 3.29787247425942 0.418830223061378
63.4842089191079 4.52127677922662 0.490401320821245
63.504432534799 4.0425533555438 0.463712672386492
63.52465615049 3.40425545730004 0.425531932162505
63.5448797661811 4.30851081314537 0.478723423682818
63.5651033818722 4.52127677922662 0.490401320821245
63.5853269975632 3.35106396577973 0.422194375282049
63.6055506132543 4.46808528770631 0.487508072438874
63.6257742289454 3.77659589794223 0.448199474208799
63.6459978446364 3.40425545730004 0.425531932162505
63.6662214603275 4.0425533555438 0.463712672386492
63.6864450760186 3.45744694882036 0.428843514653201
63.7066686917096 4.25531932162505 0.475759163456095
63.7268923074007 4.46808528770631 0.487508072438874
63.7471159230918 4.20212783010474 0.472776317979537
63.7673395387828 3.56382993186098 0.435391122555825
63.7875631544739 4.20212783010474 0.472776317979537
63.807786770165 3.6170214233813 0.438628275844795
63.828010385856 3.45744694882036 0.428843514653201
63.8482340015471 4.14893633858443 0.469774533230711
63.8684576172382 4.20212783010474 0.472776317979537
63.8886812329292 3.45744694882036 0.428843514653201
63.9089048486203 3.6170214233813 0.438628275844795
63.9291284643114 3.51063844034067 0.432129719910892
63.9493520800024 4.52127677922662 0.490401320821245
63.9695756956935 4.09574484706411 0.466753443803018
63.9897993113846 3.82978738946255 0.451344772265282
64.0100229270756 3.67021291490161 0.441841712766838
64.0302465427667 3.98936186402349 0.460651829217758
64.0504701584578 3.19148949121879 0.412019521636212
64.0706937741488 4.25531932162505 0.475759163456095
64.0909173898399 3.40425545730004 0.425531932162505
64.111141005531 3.82978738946255 0.451344772265282
64.131364621222 3.19148949121879 0.412019521636212
64.1515882369131 3.40425545730004 0.425531932162505
64.1718118526042 3.45744694882036 0.428843514653201
64.1920354682952 3.6170214233813 0.438628275844795
64.2122590839863 3.77659589794223 0.448199474208799
64.2324826996773 3.88297888098286 0.454468302768581
64.2527063153684 3.56382993186098 0.435391122555825
64.2729299310595 3.67021291490161 0.441841712766838
64.2931535467505 3.13829799969848 0.408571598914043
64.3133771624416 3.77659589794223 0.448199474208799
64.3336007781327 3.93617037250317 0.457570511496874
64.3538243938237 3.13829799969848 0.408571598914043
64.3740480095148 3.82978738946255 0.451344772265282
64.3942716252059 3.6170214233813 0.438628275844795
64.4144952408969 3.72340440642192 0.445031947067723
64.434718856588 3.82978738946255 0.451344772265282
64.4549424722791 3.56382993186098 0.435391122555825
64.4751660879701 4.14893633858443 0.469774533230711
64.4953897036612 3.45744694882036 0.428843514653201
64.5156133193523 3.72340440642192 0.445031947067723
64.5358369350433 4.0425533555438 0.463712672386492
64.5560605507344 3.56382993186098 0.435391122555825
64.5762841664255 4.14893633858443 0.469774533230711
64.5965077821165 3.88297888098286 0.454468302768581
64.6167313978076 3.45744694882036 0.428843514653201
64.6369550134987 3.67021291490161 0.441841712766838
64.6571786291897 3.82978738946255 0.451344772265282
64.6774022448808 3.03191501665785 0.401586954343472
64.6976258605719 3.45744694882036 0.428843514653201
64.7178494762629 3.6170214233813 0.438628275844795
64.738073091954 3.77659589794223 0.448199474208799
64.7582967076451 3.08510650817816 0.405094330581189
64.7785203233361 3.35106396577973 0.422194375282049
64.7987439390272 3.93617037250317 0.457570511496874
64.8189675547183 3.56382993186098 0.435391122555825
64.8391911704093 3.6170214233813 0.438628275844795
64.8594147861004 4.20212783010474 0.472776317979537
64.8796384017915 3.6170214233813 0.438628275844795
64.8998620174825 4.36170230466568 0.481669441788406
64.9200856331736 3.77659589794223 0.448199474208799
64.9403092488647 3.45744694882036 0.428843514653201
64.9605328645557 3.88297888098286 0.454468302768581
64.9807564802468 3.56382993186098 0.435391122555825
65.0009800959378 3.45744694882036 0.428843514653201
65.0212037116289 3.40425545730004 0.425531932162505
65.04142732732 2.87234054209691 0.390876038647036
65.061650943011 3.67021291490161 0.441841712766838
65.0818745587021 3.77659589794223 0.448199474208799
65.1020981743932 3.6170214233813 0.438628275844795
65.1223217900842 3.56382993186098 0.435391122555825
65.1425454057753 3.6170214233813 0.438628275844795
65.1627690214664 3.35106396577973 0.422194375282049
65.1829926371574 3.08510650817816 0.405094330581189
65.2032162528485 2.92553203361722 0.394478658939308
65.2234398685396 3.35106396577973 0.422194375282049
65.2436634842306 4.20212783010474 0.472776317979537
65.2638870999217 3.40425545730004 0.425531932162505
65.2841107156128 3.6170214233813 0.438628275844795
65.3043343313038 3.40425545730004 0.425531932162505
65.3245579469949 3.6170214233813 0.438628275844795
65.344781562686 3.29787247425942 0.418830223061378
65.365005178377 3.51063844034067 0.432129719910892
65.3852287940681 3.56382993186098 0.435391122555825
65.4054524097592 3.88297888098286 0.454468302768581
65.4256760254502 3.2446809827391 0.415438829407517
65.4458996411413 2.97872352513754 0.398048674321006
65.4661232568324 3.40425545730004 0.425531932162505
65.4863468725234 2.92553203361722 0.394478658939308
65.5065704882145 3.45744694882036 0.428843514653201
65.5267941039056 3.72340440642192 0.445031947067723
65.5470177195966 4.20212783010474 0.472776317979537
65.5672413352877 3.56382993186098 0.435391122555825
65.5874649509788 3.77659589794223 0.448199474208799
65.6076885666698 3.08510650817816 0.405094330581189
65.6279121823609 3.6170214233813 0.438628275844795
65.648135798052 3.29787247425942 0.418830223061378
65.668359413743 3.56382993186098 0.435391122555825
65.6885830294341 3.29787247425942 0.418830223061378
65.7088066451252 3.13829799969848 0.408571598914043
65.7290302608162 2.87234054209691 0.390876038647036
65.7492538765073 3.13829799969848 0.408571598914043
65.7694774921983 4.0425533555438 0.463712672386492
65.7897011078894 3.08510650817816 0.405094330581189
65.8099247235805 3.45744694882036 0.428843514653201
65.8301483392715 3.2446809827391 0.415438829407517
65.8503719549626 3.40425545730004 0.425531932162505
65.8705955706537 3.93617037250317 0.457570511496874
65.8908191863447 3.67021291490161 0.441841712766838
65.9110428020358 3.88297888098286 0.454468302768581
65.9312664177269 3.93617037250317 0.457570511496874
65.9514900334179 3.77659589794223 0.448199474208799
65.971713649109 3.35106396577973 0.422194375282049
65.9919372648001 3.29787247425942 0.418830223061378
66.0121608804911 4.09574484706411 0.466753443803018
66.0323844961822 3.51063844034067 0.432129719910892
66.0526081118733 2.97872352513754 0.398048674321006
66.0728317275643 3.13829799969848 0.408571598914043
66.0930553432554 3.77659589794223 0.448199474208799
66.1132789589465 3.40425545730004 0.425531932162505
66.1335025746375 3.03191501665785 0.401586954343472
66.1537261903286 3.2446809827391 0.415438829407517
66.1739498060197 3.51063844034067 0.432129719910892
66.1941734217107 2.92553203361722 0.394478658939308
66.2143970374018 3.6170214233813 0.438628275844795
66.2346206530929 2.97872352513754 0.398048674321006
66.2548442687839 2.92553203361722 0.394478658939308
66.275067884475 3.72340440642192 0.445031947067723
66.2952915001661 3.19148949121879 0.412019521636212
66.3155151158571 3.08510650817816 0.405094330581189
66.3357387315482 3.2446809827391 0.415438829407517
66.3559623472393 3.2446809827391 0.415438829407517
66.3761859629303 2.92553203361722 0.394478658939308
66.3964095786214 3.08510650817816 0.405094330581189
66.4166331943125 2.76595755905628 0.383569300189794
66.4368568100035 3.2446809827391 0.415438829407517
66.4570804256946 3.82978738946255 0.451344772265282
66.4773040413857 3.03191501665785 0.401586954343472
66.4975276570767 3.35106396577973 0.422194375282049
66.5177512727678 3.72340440642192 0.445031947067723
66.5379748884588 3.13829799969848 0.408571598914043
66.5581985041499 3.40425545730004 0.425531932162505
66.578422119841 2.71276606753597 0.37986322969976
66.598645735532 4.52127677922662 0.490401320821245
66.6188693512231 3.13829799969848 0.408571598914043
66.6390929669142 3.40425545730004 0.425531932162505
66.6593165826052 3.13829799969848 0.408571598914043
66.6795401982963 2.71276606753597 0.37986322969976
66.6997638139874 3.2446809827391 0.415438829407517
66.7199874296784 3.77659589794223 0.448199474208799
66.7402110453695 3.08510650817816 0.405094330581189
66.7604346610606 3.40425545730004 0.425531932162505
66.7806582767516 3.51063844034067 0.432129719910892
66.8008818924427 3.40425545730004 0.425531932162505
66.8211055081338 3.40425545730004 0.425531932162505
66.8413291238248 3.08510650817816 0.405094330581189
66.8615527395159 3.08510650817816 0.405094330581189
66.881776355207 3.03191501665785 0.401586954343472
66.901999970898 3.67021291490161 0.441841712766838
66.9222235865891 3.93617037250317 0.457570511496874
66.9424472022802 2.8191490505766 0.387239903442613
66.9626708179712 2.92553203361722 0.394478658939308
66.9828944336623 3.6170214233813 0.438628275844795
67.0031180493534 3.72340440642192 0.445031947067723
67.0233416650444 3.72340440642192 0.445031947067723
67.0435652807355 3.29787247425942 0.418830223061378
67.0637888964266 3.13829799969848 0.408571598914043
67.0840125121176 2.92553203361722 0.394478658939308
67.1042361278087 3.08510650817816 0.405094330581189
67.1244597434998 3.19148949121879 0.412019521636212
67.1446833591908 2.71276606753597 0.37986322969976
67.1649069748819 3.51063844034067 0.432129719910892
67.185130590573 2.87234054209691 0.390876038647036
67.205354206264 2.44680860993441 0.360762247785373
67.2255778219551 3.93617037250317 0.457570511496874
67.2458014376462 3.29787247425942 0.418830223061378
67.2660250533372 2.71276606753597 0.37986322969976
67.2862486690283 3.51063844034067 0.432129719910892
67.3064722847193 4.09574484706411 0.466753443803018
67.3266959004104 2.92553203361722 0.394478658939308
67.3469195161015 2.87234054209691 0.390876038647036
67.3671431317925 2.55319159297503 0.368521463374206
67.3873667474836 3.35106396577973 0.422194375282049
67.4075903631747 3.13829799969848 0.408571598914043
67.4278139788657 3.45744694882036 0.428843514653201
67.4480375945568 2.71276606753597 0.37986322969976
67.4682612102479 3.35106396577973 0.422194375282049
67.4884848259389 3.88297888098286 0.454468302768581
67.50870844163 3.82978738946255 0.451344772265282
67.5289320573211 3.19148949121879 0.412019521636212
67.5491556730121 3.03191501665785 0.401586954343472
67.5693792887032 3.35106396577973 0.422194375282049
67.5896029043943 2.92553203361722 0.394478658939308
67.6098265200853 3.08510650817816 0.405094330581189
67.6300501357764 2.8191490505766 0.387239903442613
67.6502737514675 2.97872352513754 0.398048674321006
67.6704973671585 3.56382993186098 0.435391122555825
67.6907209828496 3.13829799969848 0.408571598914043
67.7109445985407 3.35106396577973 0.422194375282049
67.7311682142317 3.29787247425942 0.418830223061378
67.7513918299228 3.19148949121879 0.412019521636212
67.7716154456139 4.0425533555438 0.463712672386492
67.7918390613049 3.72340440642192 0.445031947067723
67.812062676996 3.40425545730004 0.425531932162505
67.8322862926871 3.2446809827391 0.415438829407517
67.8525099083781 3.19148949121879 0.412019521636212
67.8727335240692 3.08510650817816 0.405094330581189
67.8929571397603 3.08510650817816 0.405094330581189
67.9131807554513 2.44680860993441 0.360762247785373
67.9334043711424 3.45744694882036 0.428843514653201
67.9536279868335 3.2446809827391 0.415438829407517
67.9738516025245 3.29787247425942 0.418830223061378
67.9940752182156 3.56382993186098 0.435391122555825
68.0142988339067 3.13829799969848 0.408571598914043
68.0345224495977 2.87234054209691 0.390876038647036
68.0547460652888 3.29787247425942 0.418830223061378
68.0749696809798 3.82978738946255 0.451344772265282
68.0951932966709 3.13829799969848 0.408571598914043
68.115416912362 2.97872352513754 0.398048674321006
68.135640528053 3.13829799969848 0.408571598914043
68.1558641437441 3.45744694882036 0.428843514653201
68.1760877594352 2.71276606753597 0.37986322969976
68.1963113751262 3.45744694882036 0.428843514653201
68.2165349908173 2.92553203361722 0.394478658939308
68.2367586065084 3.29787247425942 0.418830223061378
68.2569822221994 3.67021291490161 0.441841712766838
68.2772058378905 2.87234054209691 0.390876038647036
68.2974294535816 2.8191490505766 0.387239903442613
68.3176530692726 3.13829799969848 0.408571598914043
68.3378766849637 3.13829799969848 0.408571598914043
68.3581003006548 2.44680860993441 0.360762247785373
68.3783239163458 2.97872352513754 0.398048674321006
68.3985475320369 2.92553203361722 0.394478658939308
68.418771147728 3.29787247425942 0.418830223061378
68.438994763419 2.76595755905628 0.383569300189794
68.4592183791101 2.97872352513754 0.398048674321006
68.4794419948012 3.13829799969848 0.408571598914043
68.4996656104922 3.03191501665785 0.401586954343472
68.5198892261833 2.60638308449535 0.372340440642192
68.5401128418744 2.92553203361722 0.394478658939308
68.5603364575654 2.87234054209691 0.390876038647036
68.5805600732565 2.8191490505766 0.387239903442613
68.6007836889476 2.97872352513754 0.398048674321006
68.6210073046386 2.8191490505766 0.387239903442613
68.6412309203297 3.77659589794223 0.448199474208799
68.6614545360208 3.19148949121879 0.412019521636212
68.6816781517118 3.19148949121879 0.412019521636212
68.7019017674029 3.13829799969848 0.408571598914043
68.722125383094 3.2446809827391 0.415438829407517
68.742348998785 3.08510650817816 0.405094330581189
68.7625726144761 2.92553203361722 0.394478658939308
68.7827962301672 2.71276606753597 0.37986322969976
68.8030198458582 2.97872352513754 0.398048674321006
68.8232434615493 2.76595755905628 0.383569300189794
68.8434670772403 3.45744694882036 0.428843514653201
68.8636906929314 3.45744694882036 0.428843514653201
68.8839143086225 2.44680860993441 0.360762247785373
68.9041379243135 2.8191490505766 0.387239903442613
68.9243615400046 2.87234054209691 0.390876038647036
68.9445851556957 3.40425545730004 0.425531932162505
68.9648087713867 2.97872352513754 0.398048674321006
68.9850323870778 2.55319159297503 0.368521463374206
69.0052560027689 2.39361711841409 0.356819372592072
69.0254796184599 2.50000010145472 0.364662493543428
69.045703234151 2.92553203361722 0.394478658939308
69.0659268498421 3.45744694882036 0.428843514653201
69.0861504655331 2.60638308449535 0.372340440642192
69.1063740812242 2.71276606753597 0.37986322969976
69.1265976969153 2.97872352513754 0.398048674321006
69.1468213126063 2.92553203361722 0.394478658939308
69.1670449282974 2.92553203361722 0.394478658939308
69.1872685439885 2.97872352513754 0.398048674321006
69.2074921596795 3.45744694882036 0.428843514653201
69.2277157753706 3.35106396577973 0.422194375282049
69.2479393910617 2.87234054209691 0.390876038647036
69.2681630067527 3.45744694882036 0.428843514653201
69.2883866224438 2.65957457601566 0.376120643554402
69.3086102381349 2.87234054209691 0.390876038647036
69.3288338538259 2.55319159297503 0.368521463374206
69.349057469517 3.19148949121879 0.412019521636212
69.3692810852081 2.39361711841409 0.356819372592072
69.3895047008991 2.87234054209691 0.390876038647036
69.4097283165902 2.92553203361722 0.394478658939308
69.4299519322813 2.76595755905628 0.383569300189794
69.4501755479723 2.97872352513754 0.398048674321006
69.4703991636634 2.65957457601566 0.376120643554402
69.4906227793545 3.2446809827391 0.415438829407517
69.5108463950455 2.71276606753597 0.37986322969976
69.5310700107366 2.71276606753597 0.37986322969976
69.5512936264277 2.97872352513754 0.398048674321006
69.5715172421187 2.87234054209691 0.390876038647036
69.5917408578098 2.97872352513754 0.398048674321006
69.6119644735008 3.40425545730004 0.425531932162505
69.6321880891919 3.51063844034067 0.432129719910892
69.652411704883 2.92553203361722 0.394478658939308
69.672635320574 3.08510650817816 0.405094330581189
69.6928589362651 3.19148949121879 0.412019521636212
69.7130825519562 3.6170214233813 0.438628275844795
69.7333061676472 2.55319159297503 0.368521463374206
69.7535297833383 3.56382993186098 0.435391122555825
69.7737533990294 2.28723413537347 0.348799935660385
69.7939770147204 2.65957457601566 0.376120643554402
69.8142006304115 2.8191490505766 0.387239903442613
69.8344242461026 3.35106396577973 0.422194375282049
69.8546478617936 2.87234054209691 0.390876038647036
69.8748714774847 2.60638308449535 0.372340440642192
69.8950950931758 3.51063844034067 0.432129719910892
69.9153187088668 3.56382993186098 0.435391122555825
69.9355423245579 3.03191501665785 0.401586954343472
69.955765940249 2.34042562689378 0.352832438824499
69.97598955594 2.50000010145472 0.364662493543428
69.9962131716311 3.08510650817816 0.405094330581189
70.0164367873222 3.35106396577973 0.422194375282049
70.0366604030132 2.71276606753597 0.37986322969976
70.0568840187043 2.76595755905628 0.383569300189794
70.0771076343954 2.50000010145472 0.364662493543428
70.0973312500864 3.2446809827391 0.415438829407517
70.1175548657775 3.56382993186098 0.435391122555825
70.1377784814686 2.44680860993441 0.360762247785373
70.1580020971596 2.8191490505766 0.387239903442613
70.1782257128507 2.87234054209691 0.390876038647036
70.1984493285418 2.97872352513754 0.398048674321006
70.2186729442328 3.19148949121879 0.412019521636212
70.2388965599239 2.97872352513754 0.398048674321006
70.259120175615 2.71276606753597 0.37986322969976
70.279343791306 2.34042562689378 0.352832438824499
70.2995674069971 2.23404264385315 0.34472026390471
70.3197910226882 2.71276606753597 0.37986322969976
70.3400146383792 2.76595755905628 0.383569300189794
70.3602382540703 2.39361711841409 0.356819372592072
70.3804618697613 2.8191490505766 0.387239903442613
70.4006854854524 2.76595755905628 0.383569300189794
70.4209091011435 2.97872352513754 0.398048674321006
70.4411327168345 3.13829799969848 0.408571598914043
70.4613563325256 2.60638308449535 0.372340440642192
70.4815799482167 3.03191501665785 0.401586954343472
70.5018035639077 2.87234054209691 0.390876038647036
70.5220271795988 3.35106396577973 0.422194375282049
70.5422507952899 2.97872352513754 0.398048674321006
70.5624744109809 2.50000010145472 0.364662493543428
70.582698026672 2.55319159297503 0.368521463374206
70.6029216423631 3.03191501665785 0.401586954343472
70.6231452580541 2.55319159297503 0.368521463374206
70.6433688737452 3.13829799969848 0.408571598914043
70.6635924894363 3.45744694882036 0.428843514653201
70.6838161051273 2.65957457601566 0.376120643554402
70.7040397208184 3.56382993186098 0.435391122555825
70.7242633365095 3.29787247425942 0.418830223061378
70.7444869522005 3.03191501665785 0.401586954343472
70.7647105678916 2.71276606753597 0.37986322969976
70.7849341835827 2.87234054209691 0.390876038647036
70.8051577992737 2.55319159297503 0.368521463374206
70.8253814149648 2.65957457601566 0.376120643554402
70.8456050306559 3.08510650817816 0.405094330581189
70.8658286463469 3.67021291490161 0.441841712766838
70.886052262038 2.65957457601566 0.376120643554402
70.9062758777291 3.08510650817816 0.405094330581189
70.9264994934201 3.2446809827391 0.415438829407517
70.9467231091112 3.29787247425942 0.418830223061378
70.9669467248023 2.92553203361722 0.394478658939308
70.9871703404933 2.55319159297503 0.368521463374206
71.0073939561844 2.71276606753597 0.37986322969976
71.0276175718755 2.44680860993441 0.360762247785373
71.0478411875665 2.87234054209691 0.390876038647036
71.0680648032576 2.28723413537347 0.348799935660385
71.0882884189487 3.2446809827391 0.415438829407517
71.1085120346397 3.40425545730004 0.425531932162505
71.1287356503308 3.08510650817816 0.405094330581189
71.1489592660218 2.71276606753597 0.37986322969976
71.1691828817129 3.29787247425942 0.418830223061378
71.189406497404 3.03191501665785 0.401586954343472
71.209630113095 2.34042562689378 0.352832438824499
71.2298537287861 2.8191490505766 0.387239903442613
71.2500773444772 2.34042562689378 0.352832438824499
71.2703009601682 2.65957457601566 0.376120643554402
71.2905245758593 2.65957457601566 0.376120643554402
71.3107481915504 3.13829799969848 0.408571598914043
71.3309718072414 3.2446809827391 0.415438829407517
71.3511954229325 2.71276606753597 0.37986322969976
71.3714190386236 2.55319159297503 0.368521463374206
71.3916426543146 3.45744694882036 0.428843514653201
71.4118662700057 2.8191490505766 0.387239903442613
71.4320898856968 3.45744694882036 0.428843514653201
71.4523135013878 3.40425545730004 0.425531932162505
71.4725371170789 2.97872352513754 0.398048674321006
71.49276073277 2.55319159297503 0.368521463374206
71.512984348461 2.87234054209691 0.390876038647036
71.5332079641521 2.55319159297503 0.368521463374206
71.5534315798432 2.71276606753597 0.37986322969976
71.5736551955342 2.8191490505766 0.387239903442613
71.5938788112253 2.50000010145472 0.364662493543428
71.6141024269164 3.03191501665785 0.401586954343472
71.6343260426074 2.87234054209691 0.390876038647036
71.6545496582985 3.03191501665785 0.401586954343472
71.6747732739896 2.71276606753597 0.37986322969976
71.6949968896806 2.92553203361722 0.394478658939308
71.7152205053717 2.44680860993441 0.360762247785373
71.7354441210628 3.29787247425942 0.418830223061378
71.7556677367538 2.8191490505766 0.387239903442613
71.7758913524449 2.55319159297503 0.368521463374206
71.796114968136 2.87234054209691 0.390876038647036
71.816338583827 2.76595755905628 0.383569300189794
71.8365621995181 2.60638308449535 0.372340440642192
71.8567858152092 3.2446809827391 0.415438829407517
71.8770094309002 2.92553203361722 0.394478658939308
71.8972330465913 2.07446816929221 0.332180758076181
71.9174566622823 2.18085115233284 0.340591728578921
71.9376802779734 2.39361711841409 0.356819372592072
71.9579038936645 2.8191490505766 0.387239903442613
71.9781275093555 3.08510650817816 0.405094330581189
71.9983511250466 2.55319159297503 0.368521463374206
72.0185747407377 2.50000010145472 0.364662493543428
72.0387983564287 3.08510650817816 0.405094330581189
72.0590219721198 2.50000010145472 0.364662493543428
72.0792455878109 2.97872352513754 0.398048674321006
72.0994692035019 3.13829799969848 0.408571598914043
72.119692819193 2.71276606753597 0.37986322969976
72.1399164348841 3.35106396577973 0.422194375282049
72.1601400505751 2.92553203361722 0.394478658939308
72.1803636662662 2.18085115233284 0.340591728578921
72.2005872819573 2.8191490505766 0.387239903442613
72.2208108976483 2.8191490505766 0.387239903442613
72.2410345133394 2.76595755905628 0.383569300189794
72.2612581290305 2.39361711841409 0.356819372592072
72.2814817447215 2.55319159297503 0.368521463374206
72.3017053604126 2.76595755905628 0.383569300189794
72.3219289761037 2.76595755905628 0.383569300189794
72.3421525917947 3.08510650817816 0.405094330581189
72.3623762074858 2.71276606753597 0.37986322969976
72.3825998231769 2.97872352513754 0.398048674321006
72.4028234388679 3.03191501665785 0.401586954343472
72.423047054559 2.55319159297503 0.368521463374206
72.4432706702501 2.8191490505766 0.387239903442613
72.4634942859411 2.65957457601566 0.376120643554402
72.4837179016322 2.39361711841409 0.356819372592072
72.5039415173233 2.65957457601566 0.376120643554402
72.5241651330143 2.39361711841409 0.356819372592072
72.5443887487054 3.29787247425942 0.418830223061378
72.5646123643965 2.60638308449535 0.372340440642192
72.5848359800875 2.8191490505766 0.387239903442613
72.6050595957786 2.65957457601566 0.376120643554402
72.6252832114697 3.03191501665785 0.401586954343472
72.6455068271607 2.87234054209691 0.390876038647036
72.6657304428518 2.76595755905628 0.383569300189794
72.6859540585428 2.8191490505766 0.387239903442613
72.7061776742339 2.34042562689378 0.352832438824499
72.726401289925 2.71276606753597 0.37986322969976
72.746624905616 2.76595755905628 0.383569300189794
72.7668485213071 2.55319159297503 0.368521463374206
72.7870721369982 3.08510650817816 0.405094330581189
72.8072957526892 3.29787247425942 0.418830223061378
72.8275193683803 2.87234054209691 0.390876038647036
72.8477429840714 2.71276606753597 0.37986322969976
72.8679665997624 2.55319159297503 0.368521463374206
72.8881902154535 2.34042562689378 0.352832438824499
72.9084138311446 2.50000010145472 0.364662493543428
72.9286374468356 2.76595755905628 0.383569300189794
72.9488610625267 2.8191490505766 0.387239903442613
72.9690846782178 2.50000010145472 0.364662493543428
72.9893082939088 2.97872352513754 0.398048674321006
73.0095319095999 3.29787247425942 0.418830223061378
73.029755525291 2.76595755905628 0.383569300189794
73.049979140982 3.19148949121879 0.412019521636212
73.0702027566731 2.60638308449535 0.372340440642192
73.0904263723642 2.65957457601566 0.376120643554402
73.1106499880552 2.60638308449535 0.372340440642192
73.1308736037463 2.87234054209691 0.390876038647036
73.1510972194374 2.76595755905628 0.383569300189794
73.1713208351284 2.8191490505766 0.387239903442613
73.1915444508195 2.71276606753597 0.37986322969976
73.2117680665106 2.92553203361722 0.394478658939308
73.2319916822016 2.23404264385315 0.34472026390471
73.2522152978927 2.76595755905628 0.383569300189794
73.2724389135838 2.12765966081253 0.336412530691444
73.2926625292748 2.97872352513754 0.398048674321006
73.3128861449659 2.07446816929221 0.332180758076181
73.333109760657 3.29787247425942 0.418830223061378
73.353333376348 2.60638308449535 0.372340440642192
73.3735569920391 2.92553203361722 0.394478658939308
73.3937806077302 2.97872352513754 0.398048674321006
73.4140042234212 2.28723413537347 0.348799935660385
73.4342278391123 2.50000010145472 0.364662493543428
73.4544514548033 2.92553203361722 0.394478658939308
73.4746750704944 2.65957457601566 0.376120643554402
73.4948986861855 2.44680860993441 0.360762247785373
73.5151223018765 2.44680860993441 0.360762247785373
73.5353459175676 3.40425545730004 0.425531932162505
73.5555695332587 2.34042562689378 0.352832438824499
73.5757931489497 2.65957457601566 0.376120643554402
73.5960167646408 2.71276606753597 0.37986322969976
73.6162403803319 2.71276606753597 0.37986322969976
73.6364639960229 2.60638308449535 0.372340440642192
73.656687611714 3.08510650817816 0.405094330581189
73.6769112274051 2.76595755905628 0.383569300189794
73.6971348430961 2.44680860993441 0.360762247785373
73.7173584587872 2.71276606753597 0.37986322969976
73.7375820744783 2.71276606753597 0.37986322969976
73.7578056901693 2.44680860993441 0.360762247785373
73.7780293058604 2.18085115233284 0.340591728578921
73.7982529215515 2.97872352513754 0.398048674321006
73.8184765372425 2.60638308449535 0.372340440642192
73.8387001529336 3.13829799969848 0.408571598914043
73.8589237686247 2.39361711841409 0.356819372592072
73.8791473843157 2.8191490505766 0.387239903442613
73.8993710000068 2.39361711841409 0.356819372592072
73.9195946156979 2.97872352513754 0.398048674321006
73.9398182313889 3.08510650817816 0.405094330581189
73.96004184708 2.87234054209691 0.390876038647036
73.9802654627711 2.60638308449535 0.372340440642192
74.0004890784621 2.44680860993441 0.360762247785373
74.0207126941532 3.13829799969848 0.408571598914043
74.0409363098443 3.2446809827391 0.415438829407517
74.0611599255353 2.65957457601566 0.376120643554402
74.0813835412264 3.40425545730004 0.425531932162505
74.1016071569175 3.51063844034067 0.432129719910892
74.1218307726085 2.28723413537347 0.348799935660385
74.1420543882996 2.92553203361722 0.394478658939308
74.1622780039907 2.44680860993441 0.360762247785373
74.1825016196817 2.76595755905628 0.383569300189794
74.2027252353728 3.2446809827391 0.415438829407517
74.2229488510638 3.19148949121879 0.412019521636212
74.2431724667549 2.60638308449535 0.372340440642192
74.263396082446 2.55319159297503 0.368521463374206
74.283619698137 2.50000010145472 0.364662493543428
74.3038433138281 3.19148949121879 0.412019521636212
74.3240669295192 3.03191501665785 0.401586954343472
74.3442905452102 3.19148949121879 0.412019521636212
74.3645141609013 2.92553203361722 0.394478658939308
74.3847377765924 3.03191501665785 0.401586954343472
74.4049613922834 2.76595755905628 0.383569300189794
74.4251850079745 2.34042562689378 0.352832438824499
74.4454086236656 2.28723413537347 0.348799935660385
74.4656322393566 2.76595755905628 0.383569300189794
74.4858558550477 2.65957457601566 0.376120643554402
74.5060794707388 2.71276606753597 0.37986322969976
74.5263030864298 2.44680860993441 0.360762247785373
74.5465267021209 2.76595755905628 0.383569300189794
74.566750317812 2.0212766777719 0.327894375166624
74.586973933503 2.39361711841409 0.356819372592072
74.6071975491941 2.65957457601566 0.376120643554402
74.6274211648852 3.19148949121879 0.412019521636212
74.6476447805762 2.60638308449535 0.372340440642192
74.6678683962673 2.87234054209691 0.390876038647036
74.6880920119584 2.76595755905628 0.383569300189794
74.7083156276494 2.18085115233284 0.340591728578921
74.7285392433405 2.23404264385315 0.34472026390471
74.7487628590316 3.08510650817816 0.405094330581189
74.7689864747226 2.18085115233284 0.340591728578921
74.7892100904137 2.92553203361722 0.394478658939308
74.8094337061048 3.2446809827391 0.415438829407517
74.8296573217958 2.44680860993441 0.360762247785373
74.8498809374869 2.23404264385315 0.34472026390471
74.870104553178 2.8191490505766 0.387239903442613
74.890328168869 3.13829799969848 0.408571598914043
74.9105517845601 2.50000010145472 0.364662493543428
74.9307754002512 2.76595755905628 0.383569300189794
74.9509990159422 3.03191501665785 0.401586954343472
74.9712226316333 2.8191490505766 0.387239903442613
74.9914462473243 2.44680860993441 0.360762247785373
75.0116698630154 2.50000010145472 0.364662493543428
75.0318934787065 3.03191501665785 0.401586954343472
75.0521170943975 3.03191501665785 0.401586954343472
75.0723407100886 2.0212766777719 0.327894375166624
75.0925643257797 2.71276606753597 0.37986322969976
75.1127879414707 2.65957457601566 0.376120643554402
75.1330115571618 2.92553203361722 0.394478658939308
75.1532351728529 2.92553203361722 0.394478658939308
75.1734587885439 3.03191501665785 0.401586954343472
75.193682404235 3.29787247425942 0.418830223061378
75.2139060199261 2.87234054209691 0.390876038647036
75.2341296356171 2.71276606753597 0.37986322969976
75.2543532513082 2.60638308449535 0.372340440642192
75.2745768669993 2.23404264385315 0.34472026390471
75.2948004826903 2.23404264385315 0.34472026390471
75.3150240983814 2.76595755905628 0.383569300189794
75.3352477140725 2.97872352513754 0.398048674321006
75.3554713297635 2.65957457601566 0.376120643554402
75.3756949454546 2.23404264385315 0.34472026390471
75.3959185611457 2.39361711841409 0.356819372592072
75.4161421768367 2.28723413537347 0.348799935660385
75.4363657925278 2.07446816929221 0.332180758076181
75.4565894082189 2.87234054209691 0.390876038647036
75.4768130239099 2.44680860993441 0.360762247785373
75.497036639601 2.55319159297503 0.368521463374206
75.5172602552921 2.50000010145472 0.364662493543428
75.5374838709831 2.97872352513754 0.398048674321006
75.5577074866742 3.08510650817816 0.405094330581189
75.5779311023653 2.60638308449535 0.372340440642192
75.5981547180563 2.23404264385315 0.34472026390471
75.6183783337474 2.23404264385315 0.34472026390471
75.6386019494385 2.65957457601566 0.376120643554402
75.6588255651295 2.60638308449535 0.372340440642192
75.6790491808206 1.96808518625159 0.323551211550436
75.6992727965117 2.34042562689378 0.352832438824499
75.7194964122027 2.87234054209691 0.390876038647036
75.7397200278938 2.76595755905628 0.383569300189794
75.7599436435848 2.87234054209691 0.390876038647036
75.7801672592759 2.65957457601566 0.376120643554402
75.800390874967 2.50000010145472 0.364662493543428
75.820614490658 2.50000010145472 0.364662493543428
75.8408381063491 2.28723413537347 0.348799935660385
75.8610617220402 2.60638308449535 0.372340440642192
75.8812853377312 2.39361711841409 0.356819372592072
75.9015089534223 2.44680860993441 0.360762247785373
75.9217325691134 2.18085115233284 0.340591728578921
75.9419561848044 2.34042562689378 0.352832438824499
75.9621798004955 2.8191490505766 0.387239903442613
75.9824034161866 2.34042562689378 0.352832438824499
76.0026270318776 2.34042562689378 0.352832438824499
76.0228506475687 2.65957457601566 0.376120643554402
76.0430742632598 2.0212766777719 0.327894375166624
76.0632978789508 2.55319159297503 0.368521463374206
76.0835214946419 2.8191490505766 0.387239903442613
76.103745110333 2.55319159297503 0.368521463374206
76.123968726024 2.50000010145472 0.364662493543428
76.1441923417151 1.86170220321096 0.314685107616239
76.1644159574062 2.12765966081253 0.336412530691444
76.1846395730972 2.71276606753597 0.37986322969976
76.2048631887883 2.39361711841409 0.356819372592072
76.2250868044794 2.71276606753597 0.37986322969976
76.2453104201704 2.34042562689378 0.352832438824499
76.2655340358615 2.71276606753597 0.37986322969976
76.2857576515526 2.44680860993441 0.360762247785373
76.3059812672436 2.50000010145472 0.364662493543428
76.3262048829347 2.28723413537347 0.348799935660385
76.3464284986258 2.23404264385315 0.34472026390471
76.3666521143168 2.0212766777719 0.327894375166624
76.3868757300079 2.55319159297503 0.368521463374206
76.407099345699 1.64893623712971 0.296157690892575
76.42732296139 2.28723413537347 0.348799935660385
76.4475465770811 2.8191490505766 0.387239903442613
76.4677701927722 2.28723413537347 0.348799935660385
76.4879938084632 3.08510650817816 0.405094330581189
76.5082174241543 2.65957457601566 0.376120643554402
76.5284410398453 2.39361711841409 0.356819372592072
76.5486646555364 2.23404264385315 0.34472026390471
76.5688882712275 2.55319159297503 0.368521463374206
76.5891118869185 2.18085115233284 0.340591728578921
76.6093355026096 2.23404264385315 0.34472026390471
76.6295591183007 2.28723413537347 0.348799935660385
76.6497827339917 1.91489369473127 0.319148949121879
76.6700063496828 3.08510650817816 0.405094330581189
76.6902299653739 2.44680860993441 0.360762247785373
76.7104535810649 2.76595755905628 0.383569300189794
76.730677196756 2.44680860993441 0.360762247785373
76.7509008124471 2.55319159297503 0.368521463374206
76.7711244281381 2.50000010145472 0.364662493543428
76.7913480438292 2.60638308449535 0.372340440642192
76.8115716595203 2.18085115233284 0.340591728578921
76.8317952752113 2.39361711841409 0.356819372592072
76.8520188909024 2.18085115233284 0.340591728578921
76.8722425065935 2.50000010145472 0.364662493543428
76.8924661222845 2.55319159297503 0.368521463374206
76.9126897379756 2.65957457601566 0.376120643554402
76.9329133536667 1.91489369473127 0.319148949121879
76.9531369693577 2.55319159297503 0.368521463374206
76.9733605850488 1.75531922017033 0.305561855301235
76.9935842007399 2.8191490505766 0.387239903442613
77.0138078164309 2.34042562689378 0.352832438824499
77.034031432122 2.8191490505766 0.387239903442613
77.0542550478131 3.03191501665785 0.401586954343472
77.0744786635041 2.87234054209691 0.390876038647036
77.0947022791952 2.65957457601566 0.376120643554402
77.1149258948863 2.18085115233284 0.340591728578921
77.1351495105773 2.60638308449535 0.372340440642192
77.1553731262684 2.65957457601566 0.376120643554402
77.1755967419595 2.87234054209691 0.390876038647036
77.1958203576505 2.34042562689378 0.352832438824499
77.2160439733416 2.44680860993441 0.360762247785373
77.2362675890327 2.23404264385315 0.34472026390471
77.2564912047237 2.12765966081253 0.336412530691444
77.2767148204148 2.23404264385315 0.34472026390471
77.2969384361058 2.55319159297503 0.368521463374206
77.3171620517969 2.60638308449535 0.372340440642192
77.337385667488 2.65957457601566 0.376120643554402
77.357609283179 2.12765966081253 0.336412530691444
77.3778328988701 2.0212766777719 0.327894375166624
77.3980565145612 2.44680860993441 0.360762247785373
77.4182801302522 2.0212766777719 0.327894375166624
77.4385037459433 1.96808518625159 0.323551211550436
77.4587273616344 2.60638308449535 0.372340440642192
77.4789509773254 2.76595755905628 0.383569300189794
77.4991745930165 2.55319159297503 0.368521463374206
77.5193982087076 2.8191490505766 0.387239903442613
77.5396218243986 2.28723413537347 0.348799935660385
77.5598454400897 2.44680860993441 0.360762247785373
77.5800690557808 2.92553203361722 0.394478658939308
77.6002926714718 2.18085115233284 0.340591728578921
77.6205162871629 1.75531922017033 0.305561855301235
77.640739902854 2.44680860993441 0.360762247785373
77.660963518545 2.23404264385315 0.34472026390471
77.6811871342361 2.60638308449535 0.372340440642192
77.7014107499272 2.0212766777719 0.327894375166624
77.7216343656182 2.18085115233284 0.340591728578921
77.7418579813093 2.65957457601566 0.376120643554402
77.7620815970004 1.96808518625159 0.323551211550436
77.7823052126914 1.80851071169065 0.310157028270018
77.8025288283825 2.50000010145472 0.364662493543428
77.8227524440736 2.07446816929221 0.332180758076181
77.8429760597646 2.39361711841409 0.356819372592072
77.8631996754557 2.23404264385315 0.34472026390471
77.8834232911468 2.39361711841409 0.356819372592072
77.9036469068378 2.07446816929221 0.332180758076181
77.9238705225289 2.44680860993441 0.360762247785373
77.94409413822 2.39361711841409 0.356819372592072
77.964317753911 2.44680860993441 0.360762247785373
77.9845413696021 2.76595755905628 0.383569300189794
78.0047649852932 2.65957457601566 0.376120643554402
78.0249886009842 1.96808518625159 0.323551211550436
78.0452122166753 2.28723413537347 0.348799935660385
78.0654358323663 2.55319159297503 0.368521463374206
78.0856594480574 2.65957457601566 0.376120643554402
78.1058830637485 2.28723413537347 0.348799935660385
78.1261066794395 2.12765966081253 0.336412530691444
78.1463302951306 2.28723413537347 0.348799935660385
78.1665539108217 1.64893623712971 0.296157690892575
78.1867775265127 2.28723413537347 0.348799935660385
78.2070011422038 1.91489369473127 0.319148949121879
78.2272247578949 2.34042562689378 0.352832438824499
78.2474483735859 2.39361711841409 0.356819372592072
78.267671989277 2.34042562689378 0.352832438824499
78.2878956049681 2.0212766777719 0.327894375166624
78.3081192206591 2.28723413537347 0.348799935660385
78.3283428363502 3.2446809827391 0.415438829407517
78.3485664520413 2.92553203361722 0.394478658939308
78.3687900677323 2.65957457601566 0.376120643554402
78.3890136834234 2.60638308449535 0.372340440642192
78.4092372991145 2.07446816929221 0.332180758076181
78.4294609148055 2.28723413537347 0.348799935660385
78.4496845304966 2.39361711841409 0.356819372592072
78.4699081461877 1.96808518625159 0.323551211550436
78.4901317618787 2.87234054209691 0.390876038647036
78.5103553775698 2.28723413537347 0.348799935660385
78.5305789932609 2.07446816929221 0.332180758076181
78.5508026089519 2.44680860993441 0.360762247785373
78.571026224643 2.07446816929221 0.332180758076181
78.5912498403341 2.76595755905628 0.383569300189794
78.6114734560251 2.55319159297503 0.368521463374206
78.6316970717162 2.39361711841409 0.356819372592072
78.6519206874073 2.76595755905628 0.383569300189794
78.6721443030983 2.23404264385315 0.34472026390471
78.6923679187894 2.12765966081253 0.336412530691444
78.7125915344805 2.18085115233284 0.340591728578921
78.7328151501715 2.71276606753597 0.37986322969976
78.7530387658626 2.28723413537347 0.348799935660385
78.7732623815537 2.76595755905628 0.383569300189794
78.7934859972447 2.23404264385315 0.34472026390471
78.8137096129358 2.34042562689378 0.352832438824499
78.8339332286268 2.28723413537347 0.348799935660385
78.8541568443179 2.12765966081253 0.336412530691444
78.874380460009 2.50000010145472 0.364662493543428
78.8946040757 2.44680860993441 0.360762247785373
78.9148276913911 2.23404264385315 0.34472026390471
78.9350513070822 2.71276606753597 0.37986322969976
78.9552749227732 2.34042562689378 0.352832438824499
78.9754985384643 2.28723413537347 0.348799935660385
78.9957221541554 2.55319159297503 0.368521463374206
79.0159457698464 3.03191501665785 0.401586954343472
79.0361693855375 2.18085115233284 0.340591728578921
79.0563930012286 2.28723413537347 0.348799935660385
79.0766166169196 2.0212766777719 0.327894375166624
79.0968402326107 2.34042562689378 0.352832438824499
79.1170638483018 2.65957457601566 0.376120643554402
79.1372874639928 3.08510650817816 0.405094330581189
79.1575110796839 2.44680860993441 0.360762247785373
79.177734695375 2.28723413537347 0.348799935660385
79.197958311066 1.96808518625159 0.323551211550436
79.2181819267571 2.07446816929221 0.332180758076181
79.2384055424482 2.12765966081253 0.336412530691444
79.2586291581392 2.23404264385315 0.34472026390471
79.2788527738303 2.18085115233284 0.340591728578921
79.2990763895214 3.08510650817816 0.405094330581189
79.3193000052124 2.07446816929221 0.332180758076181
79.3395236209035 2.39361711841409 0.356819372592072
79.3597472365946 1.75531922017033 0.305561855301235
79.3799708522856 1.80851071169065 0.310157028270018
79.4001944679767 2.07446816929221 0.332180758076181
79.4204180836678 1.86170220321096 0.314685107616239
79.4406416993588 1.96808518625159 0.323551211550436
79.4608653150499 2.34042562689378 0.352832438824499
79.481088930741 2.76595755905628 0.383569300189794
79.501312546432 2.50000010145472 0.364662493543428
79.5215361621231 2.65957457601566 0.376120643554402
79.5417597778142 2.44680860993441 0.360762247785373
79.5619833935052 1.91489369473127 0.319148949121879
79.5822070091963 2.50000010145472 0.364662493543428
79.6024306248873 2.18085115233284 0.340591728578921
79.6226542405784 2.39361711841409 0.356819372592072
79.6428778562695 1.38297877952814 0.271224453219182
79.6631014719605 2.50000010145472 0.364662493543428
79.6833250876516 1.96808518625159 0.323551211550436
79.7035487033427 1.75531922017033 0.305561855301235
79.7237723190337 1.91489369473127 0.319148949121879
79.7439959347248 2.18085115233284 0.340591728578921
79.7642195504159 2.60638308449535 0.372340440642192
79.7844431661069 2.34042562689378 0.352832438824499
79.804666781798 1.91489369473127 0.319148949121879
79.8248903974891 2.12765966081253 0.336412530691444
79.8451140131801 2.07446816929221 0.332180758076181
79.8653376288712 2.0212766777719 0.327894375166624
79.8855612445623 2.50000010145472 0.364662493543428
79.9057848602533 2.34042562689378 0.352832438824499
79.9260084759444 2.18085115233284 0.340591728578921
79.9462320916355 2.0212766777719 0.327894375166624
79.9664557073265 1.48936176256877 0.281462916854699
79.9866793230176 1.54255325408908 0.286444948174184
80.0069029387087 2.0212766777719 0.327894375166624
80.0271265543997 2.18085115233284 0.340591728578921
80.0473501700908 2.92553203361722 0.394478658939308
80.0675737857819 2.18085115233284 0.340591728578921
80.0877974014729 2.23404264385315 0.34472026390471
80.108021017164 2.76595755905628 0.383569300189794
80.1282446328551 2.18085115233284 0.340591728578921
80.1484682485461 2.07446816929221 0.332180758076181
80.1686918642372 2.34042562689378 0.352832438824499
80.1889154799283 2.44680860993441 0.360762247785373
80.2091390956193 2.55319159297503 0.368521463374206
80.2293627113104 2.28723413537347 0.348799935660385
80.2495863270015 2.28723413537347 0.348799935660385
80.2698099426925 1.86170220321096 0.314685107616239
80.2900335583836 1.96808518625159 0.323551211550436
80.3102571740747 2.0212766777719 0.327894375166624
80.3304807897657 2.50000010145472 0.364662493543428
80.3507044054568 2.18085115233284 0.340591728578921
80.3709280211478 2.07446816929221 0.332180758076181
80.3911516368389 2.44680860993441 0.360762247785373
80.41137525253 2.0212766777719 0.327894375166624
80.431598868221 1.75531922017033 0.305561855301235
80.4518224839121 2.12765966081253 0.336412530691444
80.4720460996032 2.44680860993441 0.360762247785373
80.4922697152942 2.34042562689378 0.352832438824499
80.5124933309853 2.28723413537347 0.348799935660385
80.5327169466764 2.44680860993441 0.360762247785373
80.5529405623674 1.64893623712971 0.296157690892575
80.5731641780585 1.80851071169065 0.310157028270018
80.5933877937496 1.75531922017033 0.305561855301235
80.6136114094406 2.50000010145472 0.364662493543428
80.6338350251317 2.07446816929221 0.332180758076181
80.6540586408228 2.28723413537347 0.348799935660385
80.6742822565138 1.70212772865002 0.300896514843521
80.6945058722049 2.23404264385315 0.34472026390471
80.714729487896 2.07446816929221 0.332180758076181
80.734953103587 1.91489369473127 0.319148949121879
80.7551767192781 2.12765966081253 0.336412530691444
80.7754003349692 2.50000010145472 0.364662493543428
80.7956239506602 2.28723413537347 0.348799935660385
80.8158475663513 2.18085115233284 0.340591728578921
80.8360711820424 2.76595755905628 0.383569300189794
80.8562947977334 2.0212766777719 0.327894375166624
80.8765184134245 2.0212766777719 0.327894375166624
80.8967420291156 2.39361711841409 0.356819372592072
80.9169656448066 2.39361711841409 0.356819372592072
80.9371892604977 1.96808518625159 0.323551211550436
80.9574128761888 2.18085115233284 0.340591728578921
80.9776364918798 2.44680860993441 0.360762247785373
80.9978601075709 1.96808518625159 0.323551211550436
81.018083723262 2.39361711841409 0.356819372592072
81.038307338953 2.12765966081253 0.336412530691444
81.0585309546441 2.0212766777719 0.327894375166624
81.0787545703352 1.64893623712971 0.296157690892575
81.0989781860262 2.50000010145472 0.364662493543428
81.1192018017173 2.07446816929221 0.332180758076181
81.1394254174083 2.55319159297503 0.368521463374206
81.1596490330994 1.86170220321096 0.314685107616239
81.1798726487905 1.96808518625159 0.323551211550436
81.2000962644815 2.39361711841409 0.356819372592072
81.2203198801726 2.18085115233284 0.340591728578921
81.2405434958637 2.12765966081253 0.336412530691444
81.2607671115547 2.44680860993441 0.360762247785373
81.2809907272458 2.34042562689378 0.352832438824499
81.3012143429369 2.0212766777719 0.327894375166624
81.3214379586279 1.86170220321096 0.314685107616239
81.341661574319 2.34042562689378 0.352832438824499
81.3618851900101 2.0212766777719 0.327894375166624
81.3821088057011 1.80851071169065 0.310157028270018
81.4023324213922 2.39361711841409 0.356819372592072
81.4225560370833 2.34042562689378 0.352832438824499
81.4427796527743 1.59574474560939 0.291341797730203
81.4630032684654 2.12765966081253 0.336412530691444
81.4832268841565 2.0212766777719 0.327894375166624
81.5034504998475 2.39361711841409 0.356819372592072
81.5236741155386 2.18085115233284 0.340591728578921
81.5438977312297 2.39361711841409 0.356819372592072
81.5641213469207 2.07446816929221 0.332180758076181
81.5843449626118 1.80851071169065 0.310157028270018
81.6045685783029 2.34042562689378 0.352832438824499
81.6247921939939 1.96808518625159 0.323551211550436
81.645015809685 2.12765966081253 0.336412530691444
81.6652394253761 2.44680860993441 0.360762247785373
81.6854630410671 2.12765966081253 0.336412530691444
81.7056866567582 2.07446816929221 0.332180758076181
81.7259102724493 1.86170220321096 0.314685107616239
81.7461338881403 2.50000010145472 0.364662493543428
81.7663575038314 2.12765966081253 0.336412530691444
81.7865811195225 1.80851071169065 0.310157028270018
81.8068047352135 1.86170220321096 0.314685107616239
81.8270283509046 1.27659579648752 0.260584025764691
81.8472519665957 2.23404264385315 0.34472026390471
81.8674755822867 1.59574474560939 0.291341797730203
81.8876991979778 1.96808518625159 0.323551211550436
81.9079228136688 2.23404264385315 0.34472026390471
81.9281464293599 1.54255325408908 0.286444948174184
81.948370045051 2.07446816929221 0.332180758076181
81.968593660742 1.91489369473127 0.319148949121879
81.9888172764331 2.0212766777719 0.327894375166624
82.0090408921242 2.44680860993441 0.360762247785373
82.0292645078152 2.44680860993441 0.360762247785373
82.0494881235063 1.80851071169065 0.310157028270018
82.0697117391974 1.48936176256877 0.281462916854699
82.0899353548884 2.23404264385315 0.34472026390471
82.1101589705795 2.18085115233284 0.340591728578921
82.1303825862706 2.34042562689378 0.352832438824499
82.1506062019616 1.43617027104846 0.276391097530654
82.1708298176527 2.28723413537347 0.348799935660385
82.1910534333438 2.34042562689378 0.352832438824499
82.2112770490348 2.44680860993441 0.360762247785373
82.2315006647259 2.07446816929221 0.332180758076181
82.251724280417 2.71276606753597 0.37986322969976
82.271947896108 1.96808518625159 0.323551211550436
82.2921715117991 2.12765966081253 0.336412530691444
82.3123951274902 2.12765966081253 0.336412530691444
82.3326187431812 1.86170220321096 0.314685107616239
82.3528423588723 1.86170220321096 0.314685107616239
82.3730659745634 1.75531922017033 0.305561855301235
82.3932895902544 2.23404264385315 0.34472026390471
82.4135132059455 2.44680860993441 0.360762247785373
82.4337368216366 1.38297877952814 0.271224453219182
82.4539604373276 1.86170220321096 0.314685107616239
82.4741840530187 1.54255325408908 0.286444948174184
82.4944076687098 1.96808518625159 0.323551211550436
82.5146312844008 2.12765966081253 0.336412530691444
82.5348549000919 2.12765966081253 0.336412530691444
82.555078515783 2.12765966081253 0.336412530691444
82.575302131474 1.86170220321096 0.314685107616239
82.5955257471651 2.39361711841409 0.356819372592072
82.6157493628562 2.07446816929221 0.332180758076181
82.6359729785472 2.44680860993441 0.360762247785373
82.6561965942383 1.96808518625159 0.323551211550436
82.6764202099293 1.70212772865002 0.300896514843521
82.6966438256204 2.34042562689378 0.352832438824499
82.7168674413115 1.64893623712971 0.296157690892575
82.7370910570025 2.07446816929221 0.332180758076181
82.7573146726936 1.59574474560939 0.291341797730203
82.7775382883847 1.80851071169065 0.310157028270018
82.7977619040757 2.07446816929221 0.332180758076181
82.8179855197668 2.23404264385315 0.34472026390471
82.8382091354579 1.70212772865002 0.300896514843521
82.8584327511489 1.43617027104846 0.276391097530654
82.87865636684 2.28723413537347 0.348799935660385
82.8988799825311 1.54255325408908 0.286444948174184
82.9191035982221 2.0212766777719 0.327894375166624
82.9393272139132 2.0212766777719 0.327894375166624
82.9595508296043 1.59574474560939 0.291341797730203
82.9797744452953 2.07446816929221 0.332180758076181
82.9999980609864 2.18085115233284 0.340591728578921
83.0202216766775 2.23404264385315 0.34472026390471
83.0404452923685 1.70212772865002 0.300896514843521
83.0606689080596 2.0212766777719 0.327894375166624
83.0808925237507 1.91489369473127 0.319148949121879
83.1011161394417 2.18085115233284 0.340591728578921
83.1213397551328 2.60638308449535 0.372340440642192
83.1415633708239 1.80851071169065 0.310157028270018
83.1617869865149 1.91489369473127 0.319148949121879
83.182010602206 2.28723413537347 0.348799935660385
83.2022342178971 2.0212766777719 0.327894375166624
83.2224578335881 1.86170220321096 0.314685107616239
83.2426814492792 2.44680860993441 0.360762247785373
83.2629050649703 2.39361711841409 0.356819372592072
83.2831286806613 2.18085115233284 0.340591728578921
83.3033522963524 1.59574474560939 0.291341797730203
83.3235759120435 1.59574474560939 0.291341797730203
83.3437995277345 2.23404264385315 0.34472026390471
83.3640231434256 1.91489369473127 0.319148949121879
83.3842467591167 1.80851071169065 0.310157028270018
83.4044703748077 1.96808518625159 0.323551211550436
83.4246939904988 1.75531922017033 0.305561855301235
83.4449176061898 2.28723413537347 0.348799935660385
83.4651412218809 2.12765966081253 0.336412530691444
83.485364837572 2.18085115233284 0.340591728578921
83.505588453263 1.70212772865002 0.300896514843521
83.5258120689541 1.59574474560939 0.291341797730203
83.5460356846452 1.75531922017033 0.305561855301235
83.5662593003362 1.64893623712971 0.296157690892575
83.5864829160273 1.38297877952814 0.271224453219182
83.6067065317184 1.70212772865002 0.300896514843521
83.6269301474094 2.18085115233284 0.340591728578921
83.6471537631005 1.70212772865002 0.300896514843521
83.6673773787916 1.86170220321096 0.314685107616239
83.6876009944826 1.80851071169065 0.310157028270018
83.7078246101737 1.38297877952814 0.271224453219182
83.7280482258648 1.75531922017033 0.305561855301235
83.7482718415558 1.91489369473127 0.319148949121879
83.7684954572469 2.18085115233284 0.340591728578921
83.788719072938 1.96808518625159 0.323551211550436
83.808942688629 1.64893623712971 0.296157690892575
83.8291663043201 1.59574474560939 0.291341797730203
83.8493899200112 2.18085115233284 0.340591728578921
83.8696135357022 2.18085115233284 0.340591728578921
83.8898371513933 1.86170220321096 0.314685107616239
83.9100607670844 1.91489369473127 0.319148949121879
83.9302843827754 1.75531922017033 0.305561855301235
83.9505079984665 1.59574474560939 0.291341797730203
83.9707316141576 1.96808518625159 0.323551211550436
83.9909552298486 1.86170220321096 0.314685107616239
84.0111788455397 2.18085115233284 0.340591728578921
84.0314024612308 1.91489369473127 0.319148949121879
84.0516260769218 1.70212772865002 0.300896514843521
84.0718496926129 1.54255325408908 0.286444948174184
84.092073308304 1.59574474560939 0.291341797730203
84.112296923995 1.91489369473127 0.319148949121879
84.1325205396861 1.64893623712971 0.296157690892575
84.1527441553772 2.18085115233284 0.340591728578921
84.1729677710682 1.80851071169065 0.310157028270018
84.1931913867593 2.18085115233284 0.340591728578921
84.2134150024503 1.80851071169065 0.310157028270018
84.2336386181414 1.80851071169065 0.310157028270018
84.2538622338325 1.96808518625159 0.323551211550436
84.2740858495235 1.70212772865002 0.300896514843521
84.2943094652146 2.28723413537347 0.348799935660385
84.3145330809057 1.80851071169065 0.310157028270018
84.3347566965967 1.64893623712971 0.296157690892575
84.3549803122878 1.64893623712971 0.296157690892575
84.3752039279789 1.59574474560939 0.291341797730203
84.3954275436699 1.75531922017033 0.305561855301235
84.415651159361 2.0212766777719 0.327894375166624
84.4358747750521 1.86170220321096 0.314685107616239
84.4560983907431 2.23404264385315 0.34472026390471
84.4763220064342 1.59574474560939 0.291341797730203
84.4965456221253 1.64893623712971 0.296157690892575
84.5167692378163 1.59574474560939 0.291341797730203
84.5369928535074 1.86170220321096 0.314685107616239
84.5572164691985 2.39361711841409 0.356819372592072
84.5774400848895 1.48936176256877 0.281462916854699
84.5976637005806 2.12765966081253 0.336412530691444
84.6178873162717 2.23404264385315 0.34472026390471
84.6381109319627 1.48936176256877 0.281462916854699
84.6583345476538 1.70212772865002 0.300896514843521
84.6785581633449 1.91489369473127 0.319148949121879
84.6987817790359 2.23404264385315 0.34472026390471
84.719005394727 1.80851071169065 0.310157028270018
84.7392290104181 2.0212766777719 0.327894375166624
84.7594526261091 1.75531922017033 0.305561855301235
84.7796762418002 2.12765966081253 0.336412530691444
84.7998998574913 1.86170220321096 0.314685107616239
84.8201234731823 1.43617027104846 0.276391097530654
84.8403470888734 1.96808518625159 0.323551211550436
84.8605707045645 2.34042562689378 0.352832438824499
84.8807943202555 2.39361711841409 0.356819372592072
84.9010179359466 1.43617027104846 0.276391097530654
84.9212415516377 1.80851071169065 0.310157028270018
84.9414651673287 1.96808518625159 0.323551211550436
84.9616887830198 1.64893623712971 0.296157690892575
84.9819123987108 1.96808518625159 0.323551211550436
85.0021360144019 1.2234043049672 0.255097431805139
85.022359630093 2.18085115233284 0.340591728578921
85.042583245784 1.64893623712971 0.296157690892575
85.0628068614751 2.44680860993441 0.360762247785373
85.0830304771662 1.96808518625159 0.323551211550436
85.1032540928572 1.64893623712971 0.296157690892575
85.1234777085483 2.44680860993441 0.360762247785373
85.1437013242394 2.0212766777719 0.327894375166624
85.1639249399304 2.50000010145472 0.364662493543428
85.1841485556215 1.86170220321096 0.314685107616239
85.2043721713126 1.96808518625159 0.323551211550436
85.2245957870036 1.96808518625159 0.323551211550436
85.2448194026947 2.23404264385315 0.34472026390471
85.2650430183858 1.96808518625159 0.323551211550436
85.2852666340768 1.80851071169065 0.310157028270018
85.3054902497679 1.80851071169065 0.310157028270018
85.325713865459 2.0212766777719 0.327894375166624
85.34593748115 1.59574474560939 0.291341797730203
85.3661610968411 1.70212772865002 0.300896514843521
85.3863847125322 1.91489369473127 0.319148949121879
85.4066083282232 1.91489369473127 0.319148949121879
85.4268319439143 1.80851071169065 0.310157028270018
85.4470555596054 2.0212766777719 0.327894375166624
85.4672791752964 2.18085115233284 0.340591728578921
85.4875027909875 1.70212772865002 0.300896514843521
85.5077264066786 1.43617027104846 0.276391097530654
85.5279500223696 1.86170220321096 0.314685107616239
85.5481736380607 1.80851071169065 0.310157028270018
85.5683972537518 1.96808518625159 0.323551211550436
85.5886208694428 2.23404264385315 0.34472026390471
85.6088444851339 1.64893623712971 0.296157690892575
85.629068100825 1.80851071169065 0.310157028270018
85.649291716516 2.0212766777719 0.327894375166624
85.6695153322071 1.80851071169065 0.310157028270018
85.6897389478981 1.64893623712971 0.296157690892575
85.7099625635892 2.18085115233284 0.340591728578921
85.7301861792803 1.86170220321096 0.314685107616239
85.7504097949713 2.23404264385315 0.34472026390471
85.7706334106624 1.86170220321096 0.314685107616239
85.7908570263535 1.59574474560939 0.291341797730203
85.8110806420445 1.91489369473127 0.319148949121879
85.8313042577356 2.71276606753597 0.37986322969976
85.8515278734267 1.70212772865002 0.300896514843521
85.8717514891177 1.54255325408908 0.286444948174184
85.8919751048088 1.43617027104846 0.276391097530654
85.9121987204999 1.70212772865002 0.300896514843521
85.9324223361909 1.80851071169065 0.310157028270018
85.952645951882 2.07446816929221 0.332180758076181
85.9728695675731 1.59574474560939 0.291341797730203
85.9930931832641 1.54255325408908 0.286444948174184
86.0133167989552 1.32978728800783 0.265957457601566
86.0335404146463 2.07446816929221 0.332180758076181
86.0537640303373 1.64893623712971 0.296157690892575
86.0739876460284 2.18085115233284 0.340591728578921
86.0942112617195 1.86170220321096 0.314685107616239
86.1144348774105 1.96808518625159 0.323551211550436
86.1346584931016 1.43617027104846 0.276391097530654
86.1548821087927 1.80851071169065 0.310157028270018
86.1751057244837 1.86170220321096 0.314685107616239
86.1953293401748 2.12765966081253 0.336412530691444
86.2155529558659 1.75531922017033 0.305561855301235
86.2357765715569 2.0212766777719 0.327894375166624
86.256000187248 1.64893623712971 0.296157690892575
86.2762238029391 1.75531922017033 0.305561855301235
86.2964474186301 1.80851071169065 0.310157028270018
86.3166710343212 2.28723413537347 0.348799935660385
86.3368946500123 2.28723413537347 0.348799935660385
86.3571182657033 1.75531922017033 0.305561855301235
86.3773418813944 2.23404264385315 0.34472026390471
86.3975654970855 1.38297877952814 0.271224453219182
86.4177891127765 2.0212766777719 0.327894375166624
86.4380127284676 1.54255325408908 0.286444948174184
86.4582363441586 1.75531922017033 0.305561855301235
86.4784599598497 2.44680860993441 0.360762247785373
86.4986835755408 1.17021281344689 0.249490210115391
86.5189071912318 1.2234043049672 0.255097431805139
86.5391308069229 1.91489369473127 0.319148949121879
86.559354422614 1.91489369473127 0.319148949121879
86.579578038305 1.75531922017033 0.305561855301235
86.5998016539961 1.48936176256877 0.281462916854699
86.6200252696872 1.91489369473127 0.319148949121879
86.6402488853782 1.27659579648752 0.260584025764691
86.6604725010693 1.38297877952814 0.271224453219182
86.6806961167604 1.48936176256877 0.281462916854699
86.7009197324514 1.38297877952814 0.271224453219182
86.7211433481425 2.23404264385315 0.34472026390471
86.7413669638336 1.64893623712971 0.296157690892575
86.7615905795246 1.80851071169065 0.310157028270018
86.7818141952157 2.23404264385315 0.34472026390471
86.8020378109068 1.86170220321096 0.314685107616239
86.8222614265978 1.43617027104846 0.276391097530654
86.8424850422889 1.38297877952814 0.271224453219182
86.86270865798 1.59574474560939 0.291341797730203
86.882932273671 2.0212766777719 0.327894375166624
86.9031558893621 1.32978728800783 0.265957457601566
86.9233795050532 1.17021281344689 0.249490210115391
86.9436031207442 1.86170220321096 0.314685107616239
86.9638267364353 1.91489369473127 0.319148949121879
86.9840503521264 1.17021281344689 0.249490210115391
87.0042739678174 1.80851071169065 0.310157028270018
87.0244975835085 1.54255325408908 0.286444948174184
87.0447211991996 2.0212766777719 0.327894375166624
87.0649448148906 2.39361711841409 0.356819372592072
87.0851684305817 2.0212766777719 0.327894375166624
87.1053920462728 1.96808518625159 0.323551211550436
87.1256156619638 1.64893623712971 0.296157690892575
87.1458392776549 1.86170220321096 0.314685107616239
87.166062893346 1.38297877952814 0.271224453219182
87.186286509037 1.2234043049672 0.255097431805139
87.2065101247281 1.91489369473127 0.319148949121879
87.2267337404191 2.07446816929221 0.332180758076181
87.2469573561102 1.70212772865002 0.300896514843521
87.2671809718013 1.32978728800783 0.265957457601566
87.2874045874923 1.91489369473127 0.319148949121879
87.3076282031834 1.48936176256877 0.281462916854699
87.3278518188745 1.75531922017033 0.305561855301235
87.3480754345655 1.86170220321096 0.314685107616239
87.3682990502566 1.59574474560939 0.291341797730203
87.3885226659477 1.96808518625159 0.323551211550436
87.4087462816387 1.75531922017033 0.305561855301235
87.4289698973298 1.59574474560939 0.291341797730203
87.4491935130209 1.70212772865002 0.300896514843521
87.4694171287119 1.86170220321096 0.314685107616239
87.489640744403 1.91489369473127 0.319148949121879
87.5098643600941 1.80851071169065 0.310157028270018
87.5300879757851 1.43617027104846 0.276391097530654
87.5503115914762 1.86170220321096 0.314685107616239
87.5705352071673 2.0212766777719 0.327894375166624
87.5907588228583 1.2234043049672 0.255097431805139
87.6109824385494 1.75531922017033 0.305561855301235
87.6312060542405 1.43617027104846 0.276391097530654
87.6514296699315 2.12765966081253 0.336412530691444
87.6716532856226 1.70212772865002 0.300896514843521
87.6918769013137 1.38297877952814 0.271224453219182
87.7121005170047 1.48936176256877 0.281462916854699
87.7323241326958 1.86170220321096 0.314685107616239
87.7525477483869 1.43617027104846 0.276391097530654
87.7727713640779 1.43617027104846 0.276391097530654
87.792994979769 0.957446847365637 0.225672386132641
87.8132185954601 1.75531922017033 0.305561855301235
87.8334422111511 1.80851071169065 0.310157028270018
87.8536658268422 1.43617027104846 0.276391097530654
87.8738894425333 1.54255325408908 0.286444948174184
87.8941130582243 1.43617027104846 0.276391097530654
87.9143366739154 1.91489369473127 0.319148949121879
87.9345602896065 1.91489369473127 0.319148949121879
87.9547839052975 1.75531922017033 0.305561855301235
87.9750075209886 1.59574474560939 0.291341797730203
87.9952311366796 1.54255325408908 0.286444948174184
88.0154547523707 1.59574474560939 0.291341797730203
88.0356783680618 1.59574474560939 0.291341797730203
88.0559019837528 1.59574474560939 0.291341797730203
88.0761255994439 1.75531922017033 0.305561855301235
88.096349215135 1.38297877952814 0.271224453219182
88.116572830826 1.48936176256877 0.281462916854699
88.1367964465171 1.91489369473127 0.319148949121879
88.1570200622082 1.27659579648752 0.260584025764691
88.1772436778992 1.54255325408908 0.286444948174184
88.1974672935903 1.43617027104846 0.276391097530654
88.2176909092814 1.70212772865002 0.300896514843521
88.2379145249724 1.80851071169065 0.310157028270018
88.2581381406635 1.43617027104846 0.276391097530654
88.2783617563546 1.64893623712971 0.296157690892575
88.2985853720456 1.48936176256877 0.281462916854699
88.3188089877367 1.86170220321096 0.314685107616239
88.3390326034278 2.07446816929221 0.332180758076181
88.3592562191188 1.43617027104846 0.276391097530654
88.3794798348099 1.70212772865002 0.300896514843521
88.399703450501 1.86170220321096 0.314685107616239
88.419927066192 1.86170220321096 0.314685107616239
88.4401506818831 1.64893623712971 0.296157690892575
88.4603742975742 1.27659579648752 0.260584025764691
88.4805979132652 2.0212766777719 0.327894375166624
88.5008215289563 1.64893623712971 0.296157690892575
88.5210451446474 1.75531922017033 0.305561855301235
88.5412687603384 2.07446816929221 0.332180758076181
88.5614923760295 1.80851071169065 0.310157028270018
88.5817159917206 1.48936176256877 0.281462916854699
88.6019396074116 1.54255325408908 0.286444948174184
88.6221632231027 2.0212766777719 0.327894375166624
88.6423868387938 1.48936176256877 0.281462916854699
88.6626104544848 1.48936176256877 0.281462916854699
88.6828340701759 1.86170220321096 0.314685107616239
88.703057685867 1.38297877952814 0.271224453219182
88.723281301558 1.59574474560939 0.291341797730203
88.7435049172491 1.59574474560939 0.291341797730203
88.7637285329401 1.75531922017033 0.305561855301235
88.7839521486312 1.86170220321096 0.314685107616239
88.8041757643223 1.17021281344689 0.249490210115391
88.8243993800133 1.2234043049672 0.255097431805139
88.8446229957044 1.54255325408908 0.286444948174184
88.8648466113955 1.70212772865002 0.300896514843521
88.8850702270865 1.54255325408908 0.286444948174184
88.9052938427776 1.70212772865002 0.300896514843521
88.9255174584687 2.0212766777719 0.327894375166624
88.9457410741597 1.75531922017033 0.305561855301235
88.9659646898508 1.27659579648752 0.260584025764691
88.9861883055419 1.86170220321096 0.314685107616239
89.0064119212329 1.80851071169065 0.310157028270018
89.026635536924 1.32978728800783 0.265957457601566
89.0468591526151 1.48936176256877 0.281462916854699
89.0670827683061 2.07446816929221 0.332180758076181
89.0873063839972 1.75531922017033 0.305561855301235
89.1075299996883 1.43617027104846 0.276391097530654
89.1277536153793 1.38297877952814 0.271224453219182
89.1479772310704 1.59574474560939 0.291341797730203
89.1682008467615 1.54255325408908 0.286444948174184
89.1884244624525 1.32978728800783 0.265957457601566
89.2086480781436 1.32978728800783 0.265957457601566
89.2288716938347 1.64893623712971 0.296157690892575
89.2490953095257 1.54255325408908 0.286444948174184
89.2693189252168 1.64893623712971 0.296157690892575
89.2895425409079 1.59574474560939 0.291341797730203
89.3097661565989 1.17021281344689 0.249490210115391
89.32998977229 1.70212772865002 0.300896514843521
89.3502133879811 1.59574474560939 0.291341797730203
89.3704370036721 1.64893623712971 0.296157690892575
89.3906606193632 0.851063864325011 0.212765966081253
89.4108842350543 1.54255325408908 0.286444948174184
89.4311078507453 1.70212772865002 0.300896514843521
89.4513314664364 2.23404264385315 0.34472026390471
89.4715550821275 1.64893623712971 0.296157690892575
89.4917786978185 1.48936176256877 0.281462916854699
89.5120023135096 1.80851071169065 0.310157028270018
89.5322259292006 2.0212766777719 0.327894375166624
89.5524495448917 1.75531922017033 0.305561855301235
89.5726731605828 1.54255325408908 0.286444948174184
89.5928967762738 1.59574474560939 0.291341797730203
89.6131203919649 1.80851071169065 0.310157028270018
89.633344007656 1.43617027104846 0.276391097530654
89.653567623347 1.64893623712971 0.296157690892575
89.6737912390381 1.27659579648752 0.260584025764691
89.6940148547292 1.70212772865002 0.300896514843521
89.7142384704202 1.54255325408908 0.286444948174184
89.7344620861113 1.54255325408908 0.286444948174184
89.7546857018024 1.70212772865002 0.300896514843521
89.7749093174934 2.18085115233284 0.340591728578921
89.7951329331845 2.07446816929221 0.332180758076181
89.8153565488756 1.91489369473127 0.319148949121879
89.8355801645666 1.80851071169065 0.310157028270018
89.8558037802577 1.59574474560939 0.291341797730203
89.8760273959488 1.32978728800783 0.265957457601566
89.8962510116398 1.48936176256877 0.281462916854699
89.9164746273309 1.27659579648752 0.260584025764691
89.936698243022 1.54255325408908 0.286444948174184
89.956921858713 1.64893623712971 0.296157690892575
89.9771454744041 0.904255355845324 0.219314137922397
89.9973690900952 1.48936176256877 0.281462916854699
