# Supplementary material for: Gd3+-Doped Magnetic Nanoparticles for Biomedical Applications
Source: Hindawi journal article supplement (doi:10.1155/2018/1412563), 2018-08-02
Supplement: f1 [file 1412563.f1.zip › MNP-Gd0.6.xye]

'Id: "" Comment: "" Operator: "Lab Manager" Anode: "Cu" Scantype: "Coupled TwoTheta/Theta" TimePerStep: "18.8" 
4.99751234054565 3.2446809827391 0.415438829407517
5.01773595623672 1.75531922017033 0.305561855301235
5.03795957192779 2.87234054209691 0.390876038647036
5.05818318761885 2.0212766777719 0.327894375166624
5.07840680330992 1.75531922017033 0.305561855301235
5.09863041900098 2.71276606753597 0.37986322969976
5.11885403469205 2.07446816929221 0.332180758076181
5.13907765038311 2.34042562689378 0.352832438824499
5.15930126607418 2.23404264385315 0.34472026390471
5.17952488176525 2.55319159297503 0.368521463374206
5.19974849745631 1.75531922017033 0.305561855301235
5.21997211314738 2.71276606753597 0.37986322969976
5.24019572883844 2.65957457601566 0.376120643554402
5.26041934452951 2.50000010145472 0.364662493543428
5.28064296022058 2.28723413537347 0.348799935660385
5.30086657591164 2.34042562689378 0.352832438824499
5.32109019160271 2.44680860993441 0.360762247785373
5.34131380729377 2.18085115233284 0.340591728578921
5.36153742298484 2.97872352513754 0.398048674321006
5.3817610386759 3.03191501665785 0.401586954343472
5.40198465436697 2.60638308449535 0.372340440642192
5.42220827005804 2.50000010145472 0.364662493543428
5.4424318857491 2.55319159297503 0.368521463374206
5.46265550144017 2.44680860993441 0.360762247785373
5.48287911713123 2.55319159297503 0.368521463374206
5.5031027328223 2.28723413537347 0.348799935660385
5.52332634851336 1.43617027104846 0.276391097530654
5.54354996420443 2.55319159297503 0.368521463374206
5.5637735798955 2.39361711841409 0.356819372592072
5.58399719558656 2.34042562689378 0.352832438824499
5.60422081127763 3.51063844034067 0.432129719910892
5.62444442696869 2.44680860993441 0.360762247785373
5.64466804265976 3.08510650817816 0.405094330581189
5.66489165835083 2.65957457601566 0.376120643554402
5.68511527404189 2.34042562689378 0.352832438824499
5.70533888973296 2.65957457601566 0.376120643554402
5.72556250542402 3.08510650817816 0.405094330581189
5.74578612111509 2.55319159297503 0.368521463374206
5.76600973680615 1.91489369473127 0.319148949121879
5.78623335249722 2.87234054209691 0.390876038647036
5.80645696818829 1.70212772865002 0.300896514843521
5.82668058387935 2.12765966081253 0.336412530691444
5.84690419957042 2.55319159297503 0.368521463374206
5.86712781526148 3.19148949121879 0.412019521636212
5.88735143095255 2.8191490505766 0.387239903442613
5.90757504664361 2.28723413537347 0.348799935660385
5.92779866233468 2.44680860993441 0.360762247785373
5.94802227802575 2.60638308449535 0.372340440642192
5.96824589371681 2.8191490505766 0.387239903442613
5.98846950940788 2.8191490505766 0.387239903442613
6.00869312509894 2.34042562689378 0.352832438824499
6.02891674079001 2.97872352513754 0.398048674321006
6.04914035648108 2.8191490505766 0.387239903442613
6.06936397217214 2.97872352513754 0.398048674321006
6.08958758786321 2.23404264385315 0.34472026390471
6.10981120355427 2.55319159297503 0.368521463374206
6.13003481924534 2.18085115233284 0.340591728578921
6.1502584349364 2.39361711841409 0.356819372592072
6.17048205062747 2.71276606753597 0.37986322969976
6.19070566631854 2.92553203361722 0.394478658939308
6.2109292820096 2.39361711841409 0.356819372592072
6.23115289770067 2.87234054209691 0.390876038647036
6.25137651339173 2.92553203361722 0.394478658939308
6.2716001290828 2.23404264385315 0.34472026390471
6.29182374477386 2.71276606753597 0.37986322969976
6.31204736046493 2.60638308449535 0.372340440642192
6.332270976156 2.18085115233284 0.340591728578921
6.35249459184706 3.08510650817816 0.405094330581189
6.37271820753813 3.08510650817816 0.405094330581189
6.39294182322919 2.65957457601566 0.376120643554402
6.41316543892026 2.55319159297503 0.368521463374206
6.43338905461133 2.87234054209691 0.390876038647036
6.45361267030239 3.08510650817816 0.405094330581189
6.47383628599346 2.07446816929221 0.332180758076181
6.49405990168452 3.40425545730004 0.425531932162505
6.51428351737559 3.67021291490161 0.441841712766838
6.53450713306665 3.13829799969848 0.408571598914043
6.55473074875772 3.67021291490161 0.441841712766838
6.57495436444879 3.13829799969848 0.408571598914043
6.59517798013985 3.67021291490161 0.441841712766838
6.61540159583092 3.67021291490161 0.441841712766838
6.63562521152198 3.08510650817816 0.405094330581189
6.65584882721305 2.97872352513754 0.398048674321006
6.67607244290411 2.76595755905628 0.383569300189794
6.69629605859518 2.34042562689378 0.352832438824499
6.71651967428625 3.45744694882036 0.428843514653201
6.73674328997731 2.76595755905628 0.383569300189794
6.75696690566838 3.67021291490161 0.441841712766838
6.77719052135944 2.39361711841409 0.356819372592072
6.79741413705051 3.40425545730004 0.425531932162505
6.81763775274158 2.97872352513754 0.398048674321006
6.83786136843264 3.35106396577973 0.422194375282049
6.85808498412371 2.92553203361722 0.394478658939308
6.87830859981477 3.13829799969848 0.408571598914043
6.89853221550584 2.60638308449535 0.372340440642192
6.9187558311969 2.55319159297503 0.368521463374206
6.93897944688797 3.13829799969848 0.408571598914043
6.95920306257904 3.98936186402349 0.460651829217758
6.9794266782701 2.87234054209691 0.390876038647036
6.99965029396117 3.6170214233813 0.438628275844795
7.01987390965223 3.40425545730004 0.425531932162505
7.0400975253433 3.93617037250317 0.457570511496874
7.06032114103436 3.56382993186098 0.435391122555825
7.08054475672543 3.03191501665785 0.401586954343472
7.1007683724165 3.29787247425942 0.418830223061378
7.12099198810756 3.29787247425942 0.418830223061378
7.14121560379863 4.14893633858443 0.469774533230711
7.16143921948969 3.51063844034067 0.432129719910892
7.18166283518076 3.67021291490161 0.441841712766838
7.20188645087183 3.72340440642192 0.445031947067723
7.22211006656289 2.71276606753597 0.37986322969976
7.24233368225396 3.56382993186098 0.435391122555825
7.26255729794502 3.77659589794223 0.448199474208799
7.28278091363609 4.14893633858443 0.469774533230711
7.30300452932715 3.03191501665785 0.401586954343472
7.32322814501822 3.77659589794223 0.448199474208799
7.34345176070929 4.14893633858443 0.469774533230711
7.36367537640035 4.30851081314537 0.478723423682818
7.38389899209142 3.2446809827391 0.415438829407517
7.40412260778248 3.82978738946255 0.451344772265282
7.42434622347355 3.45744694882036 0.428843514653201
7.44456983916461 3.72340440642192 0.445031947067723
7.46479345485568 3.6170214233813 0.438628275844795
7.48501707054675 4.30851081314537 0.478723423682818
7.50524068623781 4.14893633858443 0.469774533230711
7.52546430192888 4.94680871138912 0.512960167678218
7.54568791761994 4.25531932162505 0.475759163456095
7.56591153331101 3.98936186402349 0.460651829217758
7.58613514900208 3.56382993186098 0.435391122555825
7.60635876469314 5.00000020290944 0.515710644057907
7.62658238038421 3.45744694882036 0.428843514653201
7.64680599607527 4.36170230466568 0.481669441788406
7.66702961176634 4.25531932162505 0.475759163456095
7.6872532274574 3.45744694882036 0.428843514653201
7.70747684314847 4.62765976226725 0.49613720380912
7.72770045883954 4.68085125378756 0.498980420230782
7.7479240745306 4.46808528770631 0.487508072438874
7.76814769022167 3.2446809827391 0.415438829407517
7.78837130591273 4.68085125378756 0.498980420230782
7.8085949216038 4.8404257283485 0.507414489430638
7.82881853729486 3.88297888098286 0.454468302768581
7.84904215298593 4.41489379618599 0.48459755047143
7.869265768677 4.94680871138912 0.512960167678218
7.88948938436806 5.00000020290944 0.515710644057907
7.90971300005913 4.89361721986881 0.510194863610278
7.92993661575019 3.93617037250317 0.457570511496874
7.95016023144126 3.88297888098286 0.454468302768581
7.97038384713233 4.73404274530787 0.501807527388583
7.99060746282339 4.94680871138912 0.512960167678218
8.01083107851446 4.41489379618599 0.48459755047143
8.03105469420552 5.21276616899069 0.526568900976162
8.05127830989659 3.67021291490161 0.441841712766838
8.07150192558765 4.73404274530787 0.501807527388583
8.09172554127872 4.0425533555438 0.463712672386492
8.11194915696979 5.15957467747038 0.523875436249008
8.13217277266085 4.68085125378756 0.498980420230782
8.15239638835192 4.94680871138912 0.512960167678218
8.17262000404298 4.57446827074693 0.493277599565779
8.19284361973405 4.57446827074693 0.493277599565779
8.21306723542511 4.30851081314537 0.478723423682818
8.23329085111618 5.00000020290944 0.515710644057907
8.25351446680725 5.00000020290944 0.515710644057907
8.27373808249831 3.2446809827391 0.415438829407517
8.29396169818938 4.89361721986881 0.510194863610278
8.31418531388044 5.00000020290944 0.515710644057907
8.33440892957151 4.94680871138912 0.512960167678218
8.35463254526258 4.8404257283485 0.507414489430638
8.37485616095364 4.57446827074693 0.493277599565779
8.39507977664471 4.25531932162505 0.475759163456095
8.41530339233577 4.89361721986881 0.510194863610278
8.43552700802684 5.47872362659226 0.539834679625181
8.4557506237179 4.8404257283485 0.507414489430638
8.47597423940897 5.37234064355163 0.534567873881054
8.49619785510004 5.10638318595006 0.521168051529382
8.5164214707911 5.37234064355163 0.534567873881054
8.53664508648217 4.78723423682818 0.504618796037166
8.55686870217323 4.89361721986881 0.510194863610278
8.5770923178643 3.98936186402349 0.460651829217758
8.59731593355536 5.69148959267351 0.550217066626112
8.61753954924643 4.94680871138912 0.512960167678218
8.6377631649375 4.78723423682818 0.504618796037166
8.65798678062856 5.37234064355163 0.534567873881054
8.67821039631963 4.62765976226725 0.49613720380912
8.69843401201069 4.78723423682818 0.504618796037166
8.71865762770176 4.52127677922662 0.490401320821245
8.73888124339283 6.27659599939695 0.5778074963847
8.75910485908389 4.46808528770631 0.487508072438874
8.77932847477496 4.62765976226725 0.49613720380912
8.79955209046602 5.265957660511 0.529248658236749
8.81977570615709 5.10638318595006 0.521168051529382
8.83999932184815 5.42553213507194 0.537207731288247
8.86022293753922 5.95744705027507 0.562925833709398
8.88044655323029 4.62765976226725 0.49613720380912
8.90067016892135 5.00000020290944 0.515710644057907
8.92089378461242 5.10638318595006 0.521168051529382
8.94111740030348 4.78723423682818 0.504618796037166
8.96134101599455 5.10638318595006 0.521168051529382
8.98156463168561 6.17021301635633 0.572889896348368
9.00178824737668 5.05319169442975 0.518446528742142
9.02201186306775 4.57446827074693 0.493277599565779
9.04223547875881 4.68085125378756 0.498980420230782
9.06245909444988 4.25531932162505 0.475759163456095
9.08268271014094 4.94680871138912 0.512960167678218
9.10290632583201 5.265957660511 0.529248658236749
9.12312994152308 3.98936186402349 0.460651829217758
9.14335355721414 4.94680871138912 0.512960167678218
9.16357717290521 5.74468108419382 0.552782195061309
9.18380078859627 3.88297888098286 0.454468302768581
9.20402440428734 5.00000020290944 0.515710644057907
9.2242480199784 4.94680871138912 0.512960167678218
9.24447163566947 4.94680871138912 0.512960167678218
9.26469525136054 4.57446827074693 0.493277599565779
9.2849188670516 4.46808528770631 0.487508072438874
9.30514248274267 5.265957660511 0.529248658236749
9.32536609843373 5.10638318595006 0.521168051529382
9.3455897141248 4.94680871138912 0.512960167678218
9.36581332981586 4.8404257283485 0.507414489430638
9.38603694550693 5.10638318595006 0.521168051529382
9.406260561198 5.58510660963288 0.545050594776606
9.42648417688906 5.05319169442975 0.518446528742142
9.44670779258013 4.14893633858443 0.469774533230711
9.46693140827119 4.52127677922662 0.490401320821245
9.48715502396226 4.78723423682818 0.504618796037166
9.50737863965333 4.14893633858443 0.469774533230711
9.52760225534439 4.41489379618599 0.48459755047143
9.54782587103546 5.37234064355163 0.534567873881054
9.56804948672652 5.31914915203132 0.531914915203132
9.58827310241759 4.94680871138912 0.512960167678218
9.60849671810865 4.62765976226725 0.49613720380912
9.62872033379972 4.09574484706411 0.466753443803018
9.64894394949079 4.14893633858443 0.469774533230711
9.66916756518185 5.90425555875476 0.560407137255822
9.68939118087292 5.10638318595006 0.521168051529382
9.70961479656398 5.05319169442975 0.518446528742142
9.72983841225505 4.09574484706411 0.466753443803018
9.75006202794611 5.10638318595006 0.521168051529382
9.77028564363718 5.53191511811257 0.542448906438364
9.79050925932825 4.52127677922662 0.490401320821245
9.81073287501931 5.10638318595006 0.521168051529382
9.83095649071038 5.31914915203132 0.531914915203132
9.85118010640144 4.14893633858443 0.469774533230711
9.87140372209251 3.93617037250317 0.457570511496874
9.89162733778358 4.25531932162505 0.475759163456095
9.91185095347464 4.09574484706411 0.466753443803018
9.93207456916571 4.94680871138912 0.512960167678218
9.95229818485677 4.73404274530787 0.501807527388583
9.97252180054784 4.41489379618599 0.48459755047143
9.9927454162389 5.00000020290944 0.515710644057907
10.01296903193 4.52127677922662 0.490401320821245
10.033192647621 4.20212783010474 0.472776317979537
10.0534162633121 4.14893633858443 0.469774533230711
10.0736398790032 5.265957660511 0.529248658236749
10.0938634946942 4.73404274530787 0.501807527388583
10.1140871103853 4.52127677922662 0.490401320821245
10.1343107260764 4.41489379618599 0.48459755047143
10.1545343417674 4.8404257283485 0.507414489430638
10.1747579574585 4.14893633858443 0.469774533230711
10.1949815731496 4.89361721986881 0.510194863610278
10.2152051888406 5.53191511811257 0.542448906438364
10.2354288045317 5.265957660511 0.529248658236749
10.2556524202228 3.08510650817816 0.405094330581189
10.2758760359138 3.72340440642192 0.445031947067723
10.2960996516049 4.36170230466568 0.481669441788406
10.316323267296 3.98936186402349 0.460651829217758
10.336546882987 3.98936186402349 0.460651829217758
10.3567704986781 4.20212783010474 0.472776317979537
10.3769941143692 4.73404274530787 0.501807527388583
10.3972177300602 4.89361721986881 0.510194863610278
10.4174413457513 4.14893633858443 0.469774533230711
10.4376649614424 4.25531932162505 0.475759163456095
10.4578885771334 3.88297888098286 0.454468302768581
10.4781121928245 4.68085125378756 0.498980420230782
10.4983358085155 4.52127677922662 0.490401320821245
10.5185594242066 4.68085125378756 0.498980420230782
10.5387830398977 3.88297888098286 0.454468302768581
10.5590066555887 4.89361721986881 0.510194863610278
10.5792302712798 4.20212783010474 0.472776317979537
10.5994538869709 3.98936186402349 0.460651829217758
10.6196775026619 4.25531932162505 0.475759163456095
10.639901118353 4.62765976226725 0.49613720380912
10.6601247340441 3.88297888098286 0.454468302768581
10.6803483497351 4.8404257283485 0.507414489430638
10.7005719654262 4.8404257283485 0.507414489430638
10.7207955811173 3.67021291490161 0.441841712766838
10.7410191968083 3.72340440642192 0.445031947067723
10.7612428124994 4.52127677922662 0.490401320821245
10.7814664281905 5.79787257571413 0.555335475138186
10.8016900438815 5.00000020290944 0.515710644057907
10.8219136595726 4.8404257283485 0.507414489430638
10.8421372752637 4.89361721986881 0.510194863610278
10.8623608909547 3.6170214233813 0.438628275844795
10.8825845066458 5.31914915203132 0.531914915203132
10.9028081223369 4.52127677922662 0.490401320821245
10.9230317380279 4.41489379618599 0.48459755047143
10.943255353719 4.25531932162505 0.475759163456095
10.9634789694101 5.53191511811257 0.542448906438364
10.9837025851011 4.14893633858443 0.469774533230711
11.0039262007922 4.30851081314537 0.478723423682818
11.0241498164833 4.73404274530787 0.501807527388583
11.0443734321743 4.25531932162505 0.475759163456095
11.0645970478654 5.31914915203132 0.531914915203132
11.0848206635565 4.78723423682818 0.504618796037166
11.1050442792475 4.09574484706411 0.466753443803018
11.1252678949386 4.52127677922662 0.490401320821245
11.1454915106297 4.30851081314537 0.478723423682818
11.1657151263207 4.41489379618599 0.48459755047143
11.1859387420118 4.14893633858443 0.469774533230711
11.2061623577029 4.73404274530787 0.501807527388583
11.2263859733939 4.52127677922662 0.490401320821245
11.246609589085 4.14893633858443 0.469774533230711
11.266833204776 4.36170230466568 0.481669441788406
11.2870568204671 4.46808528770631 0.487508072438874
11.3072804361582 5.74468108419382 0.552782195061309
11.3275040518492 4.30851081314537 0.478723423682818
11.3477276675403 4.14893633858443 0.469774533230711
11.3679512832314 5.00000020290944 0.515710644057907
11.3881748989224 4.20212783010474 0.472776317979537
11.4083985146135 4.46808528770631 0.487508072438874
11.4286221303046 3.88297888098286 0.454468302768581
11.4488457459956 3.45744694882036 0.428843514653201
11.4690693616867 4.94680871138912 0.512960167678218
11.4892929773778 5.15957467747038 0.523875436249008
11.5095165930688 2.76595755905628 0.383569300189794
11.5297402087599 4.46808528770631 0.487508072438874
11.549963824451 3.82978738946255 0.451344772265282
11.570187440142 3.72340440642192 0.445031947067723
11.5904110558331 4.62765976226725 0.49613720380912
11.6106346715242 4.73404274530787 0.501807527388583
11.6308582872152 4.46808528770631 0.487508072438874
11.6510819029063 4.8404257283485 0.507414489430638
11.6713055185974 5.265957660511 0.529248658236749
11.6915291342884 4.62765976226725 0.49613720380912
11.7117527499795 4.14893633858443 0.469774533230711
11.7319763656706 5.21276616899069 0.526568900976162
11.7521999813616 5.265957660511 0.529248658236749
11.7724235970527 4.89361721986881 0.510194863610278
11.7926472127438 3.72340440642192 0.445031947067723
11.8128708284348 4.25531932162505 0.475759163456095
11.8330944441259 4.68085125378756 0.498980420230782
11.853318059817 4.41489379618599 0.48459755047143
11.873541675508 4.46808528770631 0.487508072438874
11.8937652911991 3.98936186402349 0.460651829217758
11.9139889068902 5.21276616899069 0.526568900976162
11.9342125225812 4.41489379618599 0.48459755047143
11.9544361382723 5.21276616899069 0.526568900976162
11.9746597539634 4.52127677922662 0.490401320821245
11.9948833696544 3.51063844034067 0.432129719910892
12.0151069853455 5.00000020290944 0.515710644057907
12.0353306010365 4.89361721986881 0.510194863610278
12.0555542167276 4.25531932162505 0.475759163456095
12.0757778324187 4.89361721986881 0.510194863610278
12.0960014481097 4.62765976226725 0.49613720380912
12.1162250638008 4.25531932162505 0.475759163456095
12.1364486794919 3.40425545730004 0.425531932162505
12.1566722951829 4.52127677922662 0.490401320821245
12.176895910874 5.265957660511 0.529248658236749
12.1971195265651 4.30851081314537 0.478723423682818
12.2173431422561 3.98936186402349 0.460651829217758
12.2375667579472 5.00000020290944 0.515710644057907
12.2577903736383 4.62765976226725 0.49613720380912
12.2780139893293 5.58510660963288 0.545050594776606
12.2982376050204 4.73404274530787 0.501807527388583
12.3184612207115 4.68085125378756 0.498980420230782
12.3386848364025 5.42553213507194 0.537207731288247
12.3589084520936 3.67021291490161 0.441841712766838
12.3791320677847 4.20212783010474 0.472776317979537
12.3993556834757 4.14893633858443 0.469774533230711
12.4195792991668 4.25531932162505 0.475759163456095
12.4398029148579 4.57446827074693 0.493277599565779
12.4600265305489 4.8404257283485 0.507414489430638
12.48025014624 4.52127677922662 0.490401320821245
12.5004737619311 4.8404257283485 0.507414489430638
12.5206973776221 5.74468108419382 0.552782195061309
12.5409209933132 4.78723423682818 0.504618796037166
12.5611446090043 4.68085125378756 0.498980420230782
12.5813682246953 4.36170230466568 0.481669441788406
12.6015918403864 5.53191511811257 0.542448906438364
12.6218154560775 4.78723423682818 0.504618796037166
12.6420390717685 4.30851081314537 0.478723423682818
12.6622626874596 5.53191511811257 0.542448906438364
12.6824863031507 4.20212783010474 0.472776317979537
12.7027099188417 4.8404257283485 0.507414489430638
12.7229335345328 4.62765976226725 0.49613720380912
12.7431571502239 4.09574484706411 0.466753443803018
12.7633807659149 4.73404274530787 0.501807527388583
12.783604381606 3.93617037250317 0.457570511496874
12.803827997297 4.8404257283485 0.507414489430638
12.8240516129881 4.89361721986881 0.510194863610278
12.8442752286792 5.42553213507194 0.537207731288247
12.8644988443702 4.52127677922662 0.490401320821245
12.8847224600613 4.89361721986881 0.510194863610278
12.9049460757524 4.68085125378756 0.498980420230782
12.9251696914434 3.88297888098286 0.454468302768581
12.9453933071345 4.30851081314537 0.478723423682818
12.9656169228256 4.36170230466568 0.481669441788406
12.9858405385166 4.20212783010474 0.472776317979537
13.0060641542077 4.09574484706411 0.466753443803018
13.0262877698988 4.14893633858443 0.469774533230711
13.0465113855898 5.21276616899069 0.526568900976162
13.0667350012809 4.46808528770631 0.487508072438874
13.086958616972 4.73404274530787 0.501807527388583
13.107182232663 4.94680871138912 0.512960167678218
13.1274058483541 4.89361721986881 0.510194863610278
13.1476294640452 4.46808528770631 0.487508072438874
13.1678530797362 5.10638318595006 0.521168051529382
13.1880766954273 4.20212783010474 0.472776317979537
13.2083003111184 4.89361721986881 0.510194863610278
13.2285239268094 4.62765976226725 0.49613720380912
13.2487475425005 3.93617037250317 0.457570511496874
13.2689711581916 5.00000020290944 0.515710644057907
13.2891947738826 4.94680871138912 0.512960167678218
13.3094183895737 4.73404274530787 0.501807527388583
13.3296420052648 5.265957660511 0.529248658236749
13.3498656209558 3.93617037250317 0.457570511496874
13.3700892366469 4.78723423682818 0.504618796037166
13.390312852338 5.10638318595006 0.521168051529382
13.410536468029 4.30851081314537 0.478723423682818
13.4307600837201 3.93617037250317 0.457570511496874
13.4509836994112 4.68085125378756 0.498980420230782
13.4712073151022 5.05319169442975 0.518446528742142
13.4914309307933 5.69148959267351 0.550217066626112
13.5116545464844 5.31914915203132 0.531914915203132
13.5318781621754 4.57446827074693 0.493277599565779
13.5521017778665 4.68085125378756 0.498980420230782
13.5723253935575 4.62765976226725 0.49613720380912
13.5925490092486 3.93617037250317 0.457570511496874
13.6127726249397 3.82978738946255 0.451344772265282
13.6329962406307 4.62765976226725 0.49613720380912
13.6532198563218 4.20212783010474 0.472776317979537
13.6734434720129 4.73404274530787 0.501807527388583
13.6936670877039 5.00000020290944 0.515710644057907
13.713890703395 4.14893633858443 0.469774533230711
13.7341143190861 5.15957467747038 0.523875436249008
13.7543379347771 4.20212783010474 0.472776317979537
13.7745615504682 5.47872362659226 0.539834679625181
13.7947851661593 4.0425533555438 0.463712672386492
13.8150087818503 4.36170230466568 0.481669441788406
13.8352323975414 4.89361721986881 0.510194863610278
13.8554560132325 5.15957467747038 0.523875436249008
13.8756796289235 4.30851081314537 0.478723423682818
13.8959032446146 5.69148959267351 0.550217066626112
13.9161268603057 4.41489379618599 0.48459755047143
13.9363504759967 5.10638318595006 0.521168051529382
13.9565740916878 4.14893633858443 0.469774533230711
13.9767977073789 4.20212783010474 0.472776317979537
13.9970213230699 4.78723423682818 0.504618796037166
14.017244938761 4.94680871138912 0.512960167678218
14.0374685544521 4.62765976226725 0.49613720380912
14.0576921701431 5.265957660511 0.529248658236749
14.0779157858342 5.00000020290944 0.515710644057907
14.0981394015253 4.52127677922662 0.490401320821245
14.1183630172163 5.265957660511 0.529248658236749
14.1385866329074 4.68085125378756 0.498980420230782
14.1588102485985 3.98936186402349 0.460651829217758
14.1790338642895 5.21276616899069 0.526568900976162
14.1992574799806 4.0425533555438 0.463712672386492
14.2194810956717 5.53191511811257 0.542448906438364
14.2397047113627 4.36170230466568 0.481669441788406
14.2599283270538 5.21276616899069 0.526568900976162
14.2801519427449 4.68085125378756 0.498980420230782
14.3003755584359 5.15957467747038 0.523875436249008
14.320599174127 4.94680871138912 0.512960167678218
14.340822789818 3.56382993186098 0.435391122555825
14.3610464055091 4.20212783010474 0.472776317979537
14.3812700212002 4.78723423682818 0.504618796037166
14.4014936368912 4.41489379618599 0.48459755047143
14.4217172525823 4.36170230466568 0.481669441788406
14.4419408682734 5.21276616899069 0.526568900976162
14.4621644839644 5.00000020290944 0.515710644057907
14.4823880996555 4.62765976226725 0.49613720380912
14.5026117153466 5.05319169442975 0.518446528742142
14.5228353310376 4.36170230466568 0.481669441788406
14.5430589467287 4.0425533555438 0.463712672386492
14.5632825624198 5.21276616899069 0.526568900976162
14.5835061781108 4.09574484706411 0.466753443803018
14.6037297938019 5.265957660511 0.529248658236749
14.623953409493 5.15957467747038 0.523875436249008
14.644177025184 5.15957467747038 0.523875436249008
14.6644006408751 4.36170230466568 0.481669441788406
14.6846242565662 4.89361721986881 0.510194863610278
14.7048478722572 4.94680871138912 0.512960167678218
14.7250714879483 5.00000020290944 0.515710644057907
14.7452951036394 5.79787257571413 0.555335475138186
14.7655187193304 4.68085125378756 0.498980420230782
14.7857423350215 4.30851081314537 0.478723423682818
14.8059659507126 4.57446827074693 0.493277599565779
14.8261895664036 4.8404257283485 0.507414489430638
14.8464131820947 5.00000020290944 0.515710644057907
14.8666367977858 5.15957467747038 0.523875436249008
14.8868604134768 4.41489379618599 0.48459755047143
14.9070840291679 4.46808528770631 0.487508072438874
14.927307644859 4.52127677922662 0.490401320821245
14.94753126055 4.89361721986881 0.510194863610278
14.9677548762411 4.41489379618599 0.48459755047143
14.9879784919322 4.30851081314537 0.478723423682818
15.0082021076232 4.52127677922662 0.490401320821245
15.0284257233143 4.62765976226725 0.49613720380912
15.0486493390054 4.8404257283485 0.507414489430638
15.0688729546964 5.05319169442975 0.518446528742142
15.0890965703875 5.05319169442975 0.518446528742142
15.1093201860785 4.25531932162505 0.475759163456095
15.1295438017696 4.89361721986881 0.510194863610278
15.1497674174607 4.09574484706411 0.466753443803018
15.1699910331517 4.30851081314537 0.478723423682818
15.1902146488428 4.94680871138912 0.512960167678218
15.2104382645339 4.73404274530787 0.501807527388583
15.2306618802249 5.00000020290944 0.515710644057907
15.250885495916 4.30851081314537 0.478723423682818
15.2711091116071 4.36170230466568 0.481669441788406
15.2913327272981 4.36170230466568 0.481669441788406
15.3115563429892 5.265957660511 0.529248658236749
15.3317799586803 6.0638300333157 0.567929717304644
15.3520035743713 3.67021291490161 0.441841712766838
15.3722271900624 4.46808528770631 0.487508072438874
15.3924508057535 4.8404257283485 0.507414489430638
15.4126744214445 4.41489379618599 0.48459755047143
15.4328980371356 4.30851081314537 0.478723423682818
15.4531216528267 3.82978738946255 0.451344772265282
15.4733452685177 3.88297888098286 0.454468302768581
15.4935688842088 5.05319169442975 0.518446528742142
15.5137924998999 4.46808528770631 0.487508072438874
15.5340161155909 4.62765976226725 0.49613720380912
15.554239731282 4.68085125378756 0.498980420230782
15.5744633469731 3.93617037250317 0.457570511496874
15.5946869626641 4.73404274530787 0.501807527388583
15.6149105783552 4.14893633858443 0.469774533230711
15.6351341940463 4.73404274530787 0.501807527388583
15.6553578097373 5.265957660511 0.529248658236749
15.6755814254284 3.6170214233813 0.438628275844795
15.6958050411195 5.00000020290944 0.515710644057907
15.7160286568105 4.94680871138912 0.512960167678218
15.7362522725016 5.05319169442975 0.518446528742142
15.7564758881927 4.36170230466568 0.481669441788406
15.7766995038837 4.89361721986881 0.510194863610278
15.7969231195748 4.41489379618599 0.48459755047143
15.8171467352659 5.47872362659226 0.539834679625181
15.8373703509569 3.72340440642192 0.445031947067723
15.857593966648 3.88297888098286 0.454468302768581
15.877817582339 5.31914915203132 0.531914915203132
15.8980411980301 4.78723423682818 0.504618796037166
15.9182648137212 5.15957467747038 0.523875436249008
15.9384884294122 5.265957660511 0.529248658236749
15.9587120451033 4.52127677922662 0.490401320821245
15.9789356607944 3.98936186402349 0.460651829217758
15.9991592764854 4.36170230466568 0.481669441788406
16.0193828921765 3.82978738946255 0.451344772265282
16.0396065078676 3.88297888098286 0.454468302768581
16.0598301235586 5.265957660511 0.529248658236749
16.0800537392497 3.72340440642192 0.445031947067723
16.1002773549408 5.05319169442975 0.518446528742142
16.1205009706318 4.14893633858443 0.469774533230711
16.1407245863229 5.31914915203132 0.531914915203132
16.160948202014 4.41489379618599 0.48459755047143
16.181171817705 4.30851081314537 0.478723423682818
16.2013954333961 5.21276616899069 0.526568900976162
16.2216190490872 4.46808528770631 0.487508072438874
16.2418426647782 4.62765976226725 0.49613720380912
16.2620662804693 5.15957467747038 0.523875436249008
16.2822898961604 4.57446827074693 0.493277599565779
16.3025135118514 5.265957660511 0.529248658236749
16.3227371275425 4.8404257283485 0.507414489430638
16.3429607432336 4.73404274530787 0.501807527388583
16.3631843589246 4.73404274530787 0.501807527388583
16.3834079746157 4.30851081314537 0.478723423682818
16.4036315903068 4.0425533555438 0.463712672386492
16.4238552059978 4.57446827074693 0.493277599565779
16.4440788216889 4.89361721986881 0.510194863610278
16.46430243738 3.93617037250317 0.457570511496874
16.484526053071 4.78723423682818 0.504618796037166
16.5047496687621 4.20212783010474 0.472776317979537
16.5249732844532 4.46808528770631 0.487508072438874
16.5451969001442 4.73404274530787 0.501807527388583
16.5654205158353 4.41489379618599 0.48459755047143
16.5856441315264 3.82978738946255 0.451344772265282
16.6058677472174 4.52127677922662 0.490401320821245
16.6260913629085 5.42553213507194 0.537207731288247
16.6463149785995 4.94680871138912 0.512960167678218
16.6665385942906 3.98936186402349 0.460651829217758
16.6867622099817 3.51063844034067 0.432129719910892
16.7069858256727 4.52127677922662 0.490401320821245
16.7272094413638 4.41489379618599 0.48459755047143
16.7474330570549 4.20212783010474 0.472776317979537
16.7676566727459 4.14893633858443 0.469774533230711
16.787880288437 5.21276616899069 0.526568900976162
16.8081039041281 5.47872362659226 0.539834679625181
16.8283275198191 4.25531932162505 0.475759163456095
16.8485511355102 4.36170230466568 0.481669441788406
16.8687747512013 4.25531932162505 0.475759163456095
16.8889983668923 5.31914915203132 0.531914915203132
16.9092219825834 5.00000020290944 0.515710644057907
16.9294455982745 4.73404274530787 0.501807527388583
16.9496692139655 5.05319169442975 0.518446528742142
16.9698928296566 3.98936186402349 0.460651829217758
16.9901164453477 4.8404257283485 0.507414489430638
17.0103400610387 4.41489379618599 0.48459755047143
17.0305636767298 4.52127677922662 0.490401320821245
17.0507872924209 4.89361721986881 0.510194863610278
17.0710109081119 3.98936186402349 0.460651829217758
17.091234523803 4.20212783010474 0.472776317979537
17.1114581394941 4.30851081314537 0.478723423682818
17.1316817551851 4.8404257283485 0.507414489430638
17.1519053708762 4.20212783010474 0.472776317979537
17.1721289865673 3.6170214233813 0.438628275844795
17.1923526022583 4.62765976226725 0.49613720380912
17.2125762179494 5.6382981011532 0.547639923340591
17.2327998336405 3.98936186402349 0.460651829217758
17.2530234493315 3.98936186402349 0.460651829217758
17.2732470650226 4.78723423682818 0.504618796037166
17.2934706807137 5.53191511811257 0.542448906438364
17.3136942964047 3.93617037250317 0.457570511496874
17.3339179120958 4.0425533555438 0.463712672386492
17.3541415277869 3.88297888098286 0.454468302768581
17.3743651434779 4.57446827074693 0.493277599565779
17.394588759169 4.78723423682818 0.504618796037166
17.41481237486 4.73404274530787 0.501807527388583
17.4350359905511 4.89361721986881 0.510194863610278
17.4552596062422 5.21276616899069 0.526568900976162
17.4754832219332 4.25531932162505 0.475759163456095
17.4957068376243 3.82978738946255 0.451344772265282
17.5159304533154 4.0425533555438 0.463712672386492
17.5361540690064 4.0425533555438 0.463712672386492
17.5563776846975 4.09574484706411 0.466753443803018
17.5766013003886 4.68085125378756 0.498980420230782
17.5968249160796 4.57446827074693 0.493277599565779
17.6170485317707 5.31914915203132 0.531914915203132
17.6372721474618 4.25531932162505 0.475759163456095
17.6574957631528 4.94680871138912 0.512960167678218
17.6777193788439 5.265957660511 0.529248658236749
17.697942994535 4.09574484706411 0.466753443803018
17.718166610226 4.73404274530787 0.501807527388583
17.7383902259171 4.25531932162505 0.475759163456095
17.7586138416082 4.46808528770631 0.487508072438874
17.7788374572992 4.52127677922662 0.490401320821245
17.7990610729903 4.0425533555438 0.463712672386492
17.8192846886814 3.98936186402349 0.460651829217758
17.8395083043724 4.30851081314537 0.478723423682818
17.8597319200635 6.01063854179539 0.565433310857768
17.8799555357546 4.09574484706411 0.466753443803018
17.9001791514456 4.41489379618599 0.48459755047143
17.9204027671367 4.36170230466568 0.481669441788406
17.9406263828278 4.78723423682818 0.504618796037166
17.9608499985188 5.53191511811257 0.542448906438364
17.9810736142099 4.62765976226725 0.49613720380912
18.001297229901 5.47872362659226 0.539834679625181
18.021520845592 3.98936186402349 0.460651829217758
18.0417444612831 4.94680871138912 0.512960167678218
18.0619680769742 5.21276616899069 0.526568900976162
18.0821916926652 5.58510660963288 0.545050594776606
18.1024153083563 4.62765976226725 0.49613720380912
18.1226389240474 4.36170230466568 0.481669441788406
18.1428625397384 4.36170230466568 0.481669441788406
18.1630861554295 4.14893633858443 0.469774533230711
18.1833097711205 5.6382981011532 0.547639923340591
18.2035333868116 4.46808528770631 0.487508072438874
18.2237570025027 5.53191511811257 0.542448906438364
18.2439806181937 5.31914915203132 0.531914915203132
18.2642042338848 3.6170214233813 0.438628275844795
18.2844278495759 4.73404274530787 0.501807527388583
18.3046514652669 4.30851081314537 0.478723423682818
18.324875080958 5.31914915203132 0.531914915203132
18.3450986966491 4.41489379618599 0.48459755047143
18.3653223123401 5.00000020290944 0.515710644057907
18.3855459280312 5.79787257571413 0.555335475138186
18.4057695437223 4.14893633858443 0.469774533230711
18.4259931594133 5.37234064355163 0.534567873881054
18.4462167751044 5.53191511811257 0.542448906438364
18.4664403907955 3.93617037250317 0.457570511496874
18.4866640064865 3.98936186402349 0.460651829217758
18.5068876221776 4.8404257283485 0.507414489430638
18.5271112378687 4.09574484706411 0.466753443803018
18.5473348535597 4.68085125378756 0.498980420230782
18.5675584692508 5.6382981011532 0.547639923340591
18.5877820849419 4.8404257283485 0.507414489430638
18.6080057006329 4.46808528770631 0.487508072438874
18.628229316324 5.15957467747038 0.523875436249008
18.6484529320151 4.62765976226725 0.49613720380912
18.6686765477061 4.89361721986881 0.510194863610278
18.6889001633972 4.8404257283485 0.507414489430638
18.7091237790883 4.62765976226725 0.49613720380912
18.7293473947793 4.62765976226725 0.49613720380912
18.7495710104704 4.0425533555438 0.463712672386492
18.7697946261615 4.78723423682818 0.504618796037166
18.7900182418525 4.41489379618599 0.48459755047143
18.8102418575436 4.52127677922662 0.490401320821245
18.8304654732347 4.94680871138912 0.512960167678218
18.8506890889257 4.30851081314537 0.478723423682818
18.8709127046168 5.31914915203132 0.531914915203132
18.8911363203079 4.62765976226725 0.49613720380912
18.9113599359989 5.21276616899069 0.526568900976162
18.93158355169 5.265957660511 0.529248658236749
18.951807167381 5.42553213507194 0.537207731288247
18.9720307830721 4.20212783010474 0.472776317979537
18.9922543987632 3.51063844034067 0.432129719910892
19.0124780144542 5.00000020290944 0.515710644057907
19.0327016301453 4.14893633858443 0.469774533230711
19.0529252458364 5.37234064355163 0.534567873881054
19.0731488615274 4.62765976226725 0.49613720380912
19.0933724772185 4.30851081314537 0.478723423682818
19.1135960929096 4.30851081314537 0.478723423682818
19.1338197086006 4.78723423682818 0.504618796037166
19.1540433242917 4.36170230466568 0.481669441788406
19.1742669399828 4.52127677922662 0.490401320821245
19.1944905556738 4.68085125378756 0.498980420230782
19.2147141713649 4.14893633858443 0.469774533230711
19.234937787056 4.09574484706411 0.466753443803018
19.255161402747 4.8404257283485 0.507414489430638
19.2753850184381 4.68085125378756 0.498980420230782
19.2956086341292 4.62765976226725 0.49613720380912
19.3158322498202 4.41489379618599 0.48459755047143
19.3360558655113 5.05319169442975 0.518446528742142
19.3562794812024 4.8404257283485 0.507414489430638
19.3765030968934 5.00000020290944 0.515710644057907
19.3967267125845 5.00000020290944 0.515710644057907
19.4169503282756 5.10638318595006 0.521168051529382
19.4371739439666 5.05319169442975 0.518446528742142
19.4573975596577 4.78723423682818 0.504618796037166
19.4776211753488 4.30851081314537 0.478723423682818
19.4978447910398 5.31914915203132 0.531914915203132
19.5180684067309 3.82978738946255 0.451344772265282
19.538292022422 4.36170230466568 0.481669441788406
19.558515638113 4.62765976226725 0.49613720380912
19.5787392538041 3.88297888098286 0.454468302768581
19.5989628694952 5.53191511811257 0.542448906438364
19.6191864851862 4.36170230466568 0.481669441788406
19.6394101008773 4.62765976226725 0.49613720380912
19.6596337165684 3.72340440642192 0.445031947067723
19.6798573322594 4.46808528770631 0.487508072438874
19.7000809479505 4.20212783010474 0.472776317979537
19.7203045636415 4.78723423682818 0.504618796037166
19.7405281793326 5.21276616899069 0.526568900976162
19.7607517950237 4.73404274530787 0.501807527388583
19.7809754107147 4.46808528770631 0.487508072438874
19.8011990264058 4.57446827074693 0.493277599565779
19.8214226420969 4.62765976226725 0.49613720380912
19.8416462577879 5.10638318595006 0.521168051529382
19.861869873479 5.58510660963288 0.545050594776606
19.8820934891701 5.265957660511 0.529248658236749
19.9023171048611 3.40425545730004 0.425531932162505
19.9225407205522 4.20212783010474 0.472776317979537
19.9427643362433 5.15957467747038 0.523875436249008
19.9629879519343 3.98936186402349 0.460651829217758
19.9832115676254 4.09574484706411 0.466753443803018
20.0034351833165 5.00000020290944 0.515710644057907
20.0236587990075 4.25531932162505 0.475759163456095
20.0438824146986 4.41489379618599 0.48459755047143
20.0641060303897 3.72340440642192 0.445031947067723
20.0843296460807 3.77659589794223 0.448199474208799
20.1045532617718 4.78723423682818 0.504618796037166
20.1247768774629 4.8404257283485 0.507414489430638
20.1450004931539 4.78723423682818 0.504618796037166
20.165224108845 5.47872362659226 0.539834679625181
20.1854477245361 3.72340440642192 0.445031947067723
20.2056713402271 4.30851081314537 0.478723423682818
20.2258949559182 3.82978738946255 0.451344772265282
20.2461185716093 5.15957467747038 0.523875436249008
20.2663421873003 4.78723423682818 0.504618796037166
20.2865658029914 4.52127677922662 0.490401320821245
20.3067894186825 4.78723423682818 0.504618796037166
20.3270130343735 5.31914915203132 0.531914915203132
20.3472366500646 4.78723423682818 0.504618796037166
20.3674602657557 4.94680871138912 0.512960167678218
20.3876838814467 5.00000020290944 0.515710644057907
20.4079074971378 4.09574484706411 0.466753443803018
20.4281311128289 4.36170230466568 0.481669441788406
20.4483547285199 5.37234064355163 0.534567873881054
20.468578344211 4.78723423682818 0.504618796037166
20.488801959902 4.73404274530787 0.501807527388583
20.5090255755931 4.62765976226725 0.49613720380912
20.5292491912842 4.41489379618599 0.48459755047143
20.5494728069752 4.94680871138912 0.512960167678218
20.5696964226663 3.67021291490161 0.441841712766838
20.5899200383574 5.10638318595006 0.521168051529382
20.6101436540484 3.98936186402349 0.460651829217758
20.6303672697395 4.62765976226725 0.49613720380912
20.6505908854306 4.36170230466568 0.481669441788406
20.6708145011216 5.05319169442975 0.518446528742142
20.6910381168127 4.46808528770631 0.487508072438874
20.7112617325038 3.67021291490161 0.441841712766838
20.7314853481948 5.05319169442975 0.518446528742142
20.7517089638859 4.46808528770631 0.487508072438874
20.771932579577 4.52127677922662 0.490401320821245
20.792156195268 4.73404274530787 0.501807527388583
20.8123798109591 5.15957467747038 0.523875436249008
20.8326034266502 3.93617037250317 0.457570511496874
20.8528270423412 4.73404274530787 0.501807527388583
20.8730506580323 4.25531932162505 0.475759163456095
20.8932742737234 4.78723423682818 0.504618796037166
20.9134978894144 4.78723423682818 0.504618796037166
20.9337215051055 3.88297888098286 0.454468302768581
20.9539451207966 4.94680871138912 0.512960167678218
20.9741687364876 3.98936186402349 0.460651829217758
20.9943923521787 4.36170230466568 0.481669441788406
21.0146159678698 4.94680871138912 0.512960167678218
21.0348395835608 4.41489379618599 0.48459755047143
21.0550631992519 4.46808528770631 0.487508072438874
21.075286814943 3.82978738946255 0.451344772265282
21.095510430634 4.25531932162505 0.475759163456095
21.1157340463251 3.6170214233813 0.438628275844795
21.1359576620162 3.98936186402349 0.460651829217758
21.1561812777072 3.93617037250317 0.457570511496874
21.1764048933983 3.35106396577973 0.422194375282049
21.1966285090894 4.78723423682818 0.504618796037166
21.2168521247804 4.94680871138912 0.512960167678218
21.2370757404715 4.46808528770631 0.487508072438874
21.2572993561625 5.53191511811257 0.542448906438364
21.2775229718536 4.94680871138912 0.512960167678218
21.2977465875447 4.94680871138912 0.512960167678218
21.3179702032357 3.77659589794223 0.448199474208799
21.3381938189268 4.41489379618599 0.48459755047143
21.3584174346179 5.265957660511 0.529248658236749
21.3786410503089 4.41489379618599 0.48459755047143
21.398864666 4.36170230466568 0.481669441788406
21.4190882816911 5.265957660511 0.529248658236749
21.4393118973821 4.09574484706411 0.466753443803018
21.4595355130732 4.41489379618599 0.48459755047143
21.4797591287643 3.82978738946255 0.451344772265282
21.4999827444553 5.37234064355163 0.534567873881054
21.5202063601464 4.36170230466568 0.481669441788406
21.5404299758375 4.89361721986881 0.510194863610278
21.5606535915285 3.82978738946255 0.451344772265282
21.5808772072196 3.82978738946255 0.451344772265282
21.6011008229107 4.41489379618599 0.48459755047143
21.6213244386017 3.98936186402349 0.460651829217758
21.6415480542928 3.77659589794223 0.448199474208799
21.6617716699839 5.00000020290944 0.515710644057907
21.6819952856749 5.31914915203132 0.531914915203132
21.702218901366 4.62765976226725 0.49613720380912
21.7224425170571 5.00000020290944 0.515710644057907
21.7426661327481 4.41489379618599 0.48459755047143
21.7628897484392 4.20212783010474 0.472776317979537
21.7831133641303 3.03191501665785 0.401586954343472
21.8033369798213 3.98936186402349 0.460651829217758
21.8235605955124 4.57446827074693 0.493277599565779
21.8437842112035 5.31914915203132 0.531914915203132
21.8640078268945 4.14893633858443 0.469774533230711
21.8842314425856 4.62765976226725 0.49613720380912
21.9044550582767 4.89361721986881 0.510194863610278
21.9246786739677 5.21276616899069 0.526568900976162
21.9449022896588 4.78723423682818 0.504618796037166
21.9651259053499 4.89361721986881 0.510194863610278
21.9853495210409 4.46808528770631 0.487508072438874
22.005573136732 4.0425533555438 0.463712672386492
22.025796752423 5.21276616899069 0.526568900976162
22.0460203681141 3.88297888098286 0.454468302768581
22.0662439838052 4.25531932162505 0.475759163456095
22.0864675994962 4.68085125378756 0.498980420230782
22.1066912151873 4.36170230466568 0.481669441788406
22.1269148308784 5.00000020290944 0.515710644057907
22.1471384465694 4.62765976226725 0.49613720380912
22.1673620622605 5.15957467747038 0.523875436249008
22.1875856779516 4.52127677922662 0.490401320821245
22.2078092936426 4.25531932162505 0.475759163456095
22.2280329093337 4.20212783010474 0.472776317979537
22.2482565250248 4.14893633858443 0.469774533230711
22.2684801407158 4.57446827074693 0.493277599565779
22.2887037564069 4.68085125378756 0.498980420230782
22.308927372098 3.93617037250317 0.457570511496874
22.329150987789 4.41489379618599 0.48459755047143
22.3493746034801 3.98936186402349 0.460651829217758
22.3695982191712 4.25531932162505 0.475759163456095
22.3898218348622 4.73404274530787 0.501807527388583
22.4100454505533 4.20212783010474 0.472776317979537
22.4302690662444 4.30851081314537 0.478723423682818
22.4504926819354 4.46808528770631 0.487508072438874
22.4707162976265 4.41489379618599 0.48459755047143
22.4909399133176 4.46808528770631 0.487508072438874
22.5111635290086 4.41489379618599 0.48459755047143
22.5313871446997 4.0425533555438 0.463712672386492
22.5516107603908 5.265957660511 0.529248658236749
22.5718343760818 3.29787247425942 0.418830223061378
22.5920579917729 4.52127677922662 0.490401320821245
22.612281607464 3.6170214233813 0.438628275844795
22.632505223155 4.46808528770631 0.487508072438874
22.6527288388461 4.20212783010474 0.472776317979537
22.6729524545372 5.53191511811257 0.542448906438364
22.6931760702282 3.6170214233813 0.438628275844795
22.7133996859193 5.00000020290944 0.515710644057907
22.7336233016104 5.31914915203132 0.531914915203132
22.7538469173014 3.40425545730004 0.425531932162505
22.7740705329925 3.93617037250317 0.457570511496874
22.7942941486835 3.08510650817816 0.405094330581189
22.8145177643746 4.52127677922662 0.490401320821245
22.8347413800657 4.46808528770631 0.487508072438874
22.8549649957567 3.77659589794223 0.448199474208799
22.8751886114478 4.46808528770631 0.487508072438874
22.8954122271389 4.57446827074693 0.493277599565779
22.9156358428299 5.00000020290944 0.515710644057907
22.935859458521 4.09574484706411 0.466753443803018
22.9560830742121 4.20212783010474 0.472776317979537
22.9763066899031 4.73404274530787 0.501807527388583
22.9965303055942 4.25531932162505 0.475759163456095
23.0167539212853 4.8404257283485 0.507414489430638
23.0369775369763 4.30851081314537 0.478723423682818
23.0572011526674 4.14893633858443 0.469774533230711
23.0774247683585 5.42553213507194 0.537207731288247
23.0976483840495 3.93617037250317 0.457570511496874
23.1178719997406 3.88297888098286 0.454468302768581
23.1380956154317 4.89361721986881 0.510194863610278
23.1583192311227 4.20212783010474 0.472776317979537
23.1785428468138 4.41489379618599 0.48459755047143
23.1987664625049 5.21276616899069 0.526568900976162
23.2189900781959 3.88297888098286 0.454468302768581
23.239213693887 3.93617037250317 0.457570511496874
23.2594373095781 4.36170230466568 0.481669441788406
23.2796609252691 4.73404274530787 0.501807527388583
23.2998845409602 3.88297888098286 0.454468302768581
23.3201081566513 5.15957467747038 0.523875436249008
23.3403317723423 4.0425533555438 0.463712672386492
23.3605553880334 4.94680871138912 0.512960167678218
23.3807790037245 3.82978738946255 0.451344772265282
23.4010026194155 4.46808528770631 0.487508072438874
23.4212262351066 3.93617037250317 0.457570511496874
23.4414498507977 4.62765976226725 0.49613720380912
23.4616734664887 3.77659589794223 0.448199474208799
23.4818970821798 4.09574484706411 0.466753443803018
23.5021206978709 4.0425533555438 0.463712672386492
23.5223443135619 3.82978738946255 0.451344772265282
23.542567929253 5.21276616899069 0.526568900976162
23.562791544944 4.25531932162505 0.475759163456095
23.5830151606351 4.78723423682818 0.504618796037166
23.6032387763262 3.88297888098286 0.454468302768581
23.6234623920172 4.41489379618599 0.48459755047143
23.6436860077083 4.36170230466568 0.481669441788406
23.6639096233994 3.98936186402349 0.460651829217758
23.6841332390904 4.89361721986881 0.510194863610278
23.7043568547815 4.57446827074693 0.493277599565779
23.7245804704726 3.51063844034067 0.432129719910892
23.7448040861636 4.62765976226725 0.49613720380912
23.7650277018547 4.41489379618599 0.48459755047143
23.7852513175458 5.21276616899069 0.526568900976162
23.8054749332368 3.40425545730004 0.425531932162505
23.8256985489279 4.52127677922662 0.490401320821245
23.845922164619 3.67021291490161 0.441841712766838
23.86614578031 3.6170214233813 0.438628275844795
23.8863693960011 5.31914915203132 0.531914915203132
23.9065930116922 3.88297888098286 0.454468302768581
23.9268166273832 3.93617037250317 0.457570511496874
23.9470402430743 4.20212783010474 0.472776317979537
23.9672638587654 4.36170230466568 0.481669441788406
23.9874874744564 4.52127677922662 0.490401320821245
24.0077110901475 4.09574484706411 0.466753443803018
24.0279347058386 3.51063844034067 0.432129719910892
24.0481583215296 3.67021291490161 0.441841712766838
24.0683819372207 4.14893633858443 0.469774533230711
24.0886055529118 4.73404274530787 0.501807527388583
24.1088291686028 4.36170230466568 0.481669441788406
24.1290527842939 4.14893633858443 0.469774533230711
24.149276399985 4.30851081314537 0.478723423682818
24.169500015676 4.41489379618599 0.48459755047143
24.1897236313671 4.41489379618599 0.48459755047143
24.2099472470582 4.73404274530787 0.501807527388583
24.2301708627492 5.37234064355163 0.534567873881054
24.2503944784403 4.36170230466568 0.481669441788406
24.2706180941314 5.10638318595006 0.521168051529382
24.2908417098224 4.41489379618599 0.48459755047143
24.3110653255135 4.41489379618599 0.48459755047143
24.3312889412045 4.52127677922662 0.490401320821245
24.3515125568956 3.67021291490161 0.441841712766838
24.3717361725867 5.6382981011532 0.547639923340591
24.3919597882777 3.6170214233813 0.438628275844795
24.4121834039688 5.05319169442975 0.518446528742142
24.4324070196599 4.57446827074693 0.493277599565779
24.4526306353509 4.57446827074693 0.493277599565779
24.472854251042 4.36170230466568 0.481669441788406
24.4930778667331 4.94680871138912 0.512960167678218
24.5133014824241 4.68085125378756 0.498980420230782
24.5335250981152 5.00000020290944 0.515710644057907
24.5537487138063 4.09574484706411 0.466753443803018
24.5739723294973 5.74468108419382 0.552782195061309
24.5941959451884 3.45744694882036 0.428843514653201
24.6144195608795 4.46808528770631 0.487508072438874
24.6346431765705 4.41489379618599 0.48459755047143
24.6548667922616 4.09574484706411 0.466753443803018
24.6750904079527 4.68085125378756 0.498980420230782
24.6953140236437 4.0425533555438 0.463712672386492
24.7155376393348 4.62765976226725 0.49613720380912
24.7357612550259 3.72340440642192 0.445031947067723
24.7559848707169 3.13829799969848 0.408571598914043
24.776208486408 4.52127677922662 0.490401320821245
24.7964321020991 4.78723423682818 0.504618796037166
24.8166557177901 4.57446827074693 0.493277599565779
24.8368793334812 4.57446827074693 0.493277599565779
24.8571029491723 3.88297888098286 0.454468302768581
24.8773265648633 4.0425533555438 0.463712672386492
24.8975501805544 4.14893633858443 0.469774533230711
24.9177737962455 3.93617037250317 0.457570511496874
24.9379974119365 4.0425533555438 0.463712672386492
24.9582210276276 4.46808528770631 0.487508072438874
24.9784446433187 4.09574484706411 0.466753443803018
24.9986682590097 3.13829799969848 0.408571598914043
25.0188918747008 3.77659589794223 0.448199474208799
25.0391154903919 4.36170230466568 0.481669441788406
25.0593391060829 4.52127677922662 0.490401320821245
25.079562721774 3.51063844034067 0.432129719910892
25.099786337465 4.36170230466568 0.481669441788406
25.1200099531561 3.56382993186098 0.435391122555825
25.1402335688472 4.89361721986881 0.510194863610278
25.1604571845382 4.14893633858443 0.469774533230711
25.1806808002293 3.40425545730004 0.425531932162505
25.2009044159204 4.41489379618599 0.48459755047143
25.2211280316114 3.82978738946255 0.451344772265282
25.2413516473025 3.77659589794223 0.448199474208799
25.2615752629936 4.62765976226725 0.49613720380912
25.2817988786846 4.41489379618599 0.48459755047143
25.3020224943757 4.62765976226725 0.49613720380912
25.3222461100668 4.20212783010474 0.472776317979537
25.3424697257578 3.51063844034067 0.432129719910892
25.3626933414489 4.57446827074693 0.493277599565779
25.38291695714 4.30851081314537 0.478723423682818
25.403140572831 3.77659589794223 0.448199474208799
25.4233641885221 3.82978738946255 0.451344772265282
25.4435878042132 4.52127677922662 0.490401320821245
25.4638114199042 4.25531932162505 0.475759163456095
25.4840350355953 4.52127677922662 0.490401320821245
25.5042586512864 3.77659589794223 0.448199474208799
25.5244822669774 4.14893633858443 0.469774533230711
25.5447058826685 4.14893633858443 0.469774533230711
25.5649294983596 3.98936186402349 0.460651829217758
25.5851531140506 4.41489379618599 0.48459755047143
25.6053767297417 4.0425533555438 0.463712672386492
25.6256003454328 3.51063844034067 0.432129719910892
25.6458239611238 4.41489379618599 0.48459755047143
25.6660475768149 3.72340440642192 0.445031947067723
25.686271192506 4.36170230466568 0.481669441788406
25.706494808197 4.94680871138912 0.512960167678218
25.7267184238881 4.25531932162505 0.475759163456095
25.7469420395792 4.46808528770631 0.487508072438874
25.7671656552702 4.52127677922662 0.490401320821245
25.7873892709613 5.10638318595006 0.521168051529382
25.8076128866524 4.14893633858443 0.469774533230711
25.8278365023434 3.93617037250317 0.457570511496874
25.8480601180345 4.68085125378756 0.498980420230782
25.8682837337255 4.20212783010474 0.472776317979537
25.8885073494166 3.56382993186098 0.435391122555825
25.9087309651077 4.0425533555438 0.463712672386492
25.9289545807987 4.52127677922662 0.490401320821245
25.9491781964898 4.14893633858443 0.469774533230711
25.9694018121809 5.10638318595006 0.521168051529382
25.9896254278719 3.19148949121879 0.412019521636212
26.009849043563 5.15957467747038 0.523875436249008
26.0300726592541 4.25531932162505 0.475759163456095
26.0502962749451 4.62765976226725 0.49613720380912
26.0705198906362 3.51063844034067 0.432129719910892
26.0907435063273 4.30851081314537 0.478723423682818
26.1109671220183 3.82978738946255 0.451344772265282
26.1311907377094 3.93617037250317 0.457570511496874
26.1514143534005 3.77659589794223 0.448199474208799
26.1716379690915 4.30851081314537 0.478723423682818
26.1918615847826 4.57446827074693 0.493277599565779
26.2120852004737 4.36170230466568 0.481669441788406
26.2323088161647 4.62765976226725 0.49613720380912
26.2525324318558 4.78723423682818 0.504618796037166
26.2727560475469 3.72340440642192 0.445031947067723
26.2929796632379 5.00000020290944 0.515710644057907
26.313203278929 3.35106396577973 0.422194375282049
26.3334268946201 5.00000020290944 0.515710644057907
26.3536505103111 3.56382993186098 0.435391122555825
26.3738741260022 4.46808528770631 0.487508072438874
26.3940977416933 3.6170214233813 0.438628275844795
26.4143213573843 4.36170230466568 0.481669441788406
26.4345449730754 4.14893633858443 0.469774533230711
26.4547685887665 4.68085125378756 0.498980420230782
26.4749922044575 4.20212783010474 0.472776317979537
26.4952158201486 3.88297888098286 0.454468302768581
26.5154394358397 3.82978738946255 0.451344772265282
26.5356630515307 4.0425533555438 0.463712672386492
26.5558866672218 4.20212783010474 0.472776317979537
26.5761102829129 2.92553203361722 0.394478658939308
26.5963338986039 4.73404274530787 0.501807527388583
26.616557514295 3.51063844034067 0.432129719910892
26.636781129986 4.46808528770631 0.487508072438874
26.6570047456771 3.77659589794223 0.448199474208799
26.6772283613682 3.6170214233813 0.438628275844795
26.6974519770592 3.82978738946255 0.451344772265282
26.7176755927503 3.72340440642192 0.445031947067723
26.7378992084414 4.94680871138912 0.512960167678218
26.7581228241324 4.36170230466568 0.481669441788406
26.7783464398235 3.56382993186098 0.435391122555825
26.7985700555146 4.41489379618599 0.48459755047143
26.8187936712056 3.77659589794223 0.448199474208799
26.8390172868967 4.41489379618599 0.48459755047143
26.8592409025878 4.62765976226725 0.49613720380912
26.8794645182788 3.93617037250317 0.457570511496874
26.8996881339699 3.6170214233813 0.438628275844795
26.919911749661 4.0425533555438 0.463712672386492
26.940135365352 3.72340440642192 0.445031947067723
26.9603589810431 3.51063844034067 0.432129719910892
26.9805825967342 3.82978738946255 0.451344772265282
27.0008062124252 5.21276616899069 0.526568900976162
27.0210298281163 3.77659589794223 0.448199474208799
27.0412534438074 4.46808528770631 0.487508072438874
27.0614770594984 3.93617037250317 0.457570511496874
27.0817006751895 5.15957467747038 0.523875436249008
27.1019242908806 3.72340440642192 0.445031947067723
27.1221479065716 3.2446809827391 0.415438829407517
27.1423715222627 4.68085125378756 0.498980420230782
27.1625951379538 3.72340440642192 0.445031947067723
27.1828187536448 4.25531932162505 0.475759163456095
27.2030423693359 3.67021291490161 0.441841712766838
27.223265985027 3.88297888098286 0.454468302768581
27.243489600718 4.68085125378756 0.498980420230782
27.2637132164091 3.29787247425942 0.418830223061378
27.2839368321002 3.67021291490161 0.441841712766838
27.3041604477912 4.52127677922662 0.490401320821245
27.3243840634823 4.14893633858443 0.469774533230711
27.3446076791734 4.09574484706411 0.466753443803018
27.3648312948644 4.94680871138912 0.512960167678218
27.3850549105555 3.88297888098286 0.454468302768581
27.4052785262465 4.8404257283485 0.507414489430638
27.4255021419376 3.93617037250317 0.457570511496874
27.4457257576287 4.0425533555438 0.463712672386492
27.4659493733197 4.25531932162505 0.475759163456095
27.4861729890108 4.8404257283485 0.507414489430638
27.5063966047019 3.6170214233813 0.438628275844795
27.5266202203929 3.72340440642192 0.445031947067723
27.546843836084 3.67021291490161 0.441841712766838
27.5670674517751 4.78723423682818 0.504618796037166
27.5872910674661 4.36170230466568 0.481669441788406
27.6075146831572 4.57446827074693 0.493277599565779
27.6277382988483 3.98936186402349 0.460651829217758
27.6479619145393 4.0425533555438 0.463712672386492
27.6681855302304 4.41489379618599 0.48459755047143
27.6884091459215 4.25531932162505 0.475759163456095
27.7086327616125 4.36170230466568 0.481669441788406
27.7288563773036 3.51063844034067 0.432129719910892
27.7490799929947 4.73404274530787 0.501807527388583
27.7693036086857 3.98936186402349 0.460651829217758
27.7895272243768 4.62765976226725 0.49613720380912
27.8097508400679 4.09574484706411 0.466753443803018
27.8299744557589 4.78723423682818 0.504618796037166
27.85019807145 4.52127677922662 0.490401320821245
27.8704216871411 4.25531932162505 0.475759163456095
27.8906453028321 3.72340440642192 0.445031947067723
27.9108689185232 4.0425533555438 0.463712672386492
27.9310925342143 3.72340440642192 0.445031947067723
27.9513161499053 4.0425533555438 0.463712672386492
27.9715397655964 5.42553213507194 0.537207731288247
27.9917633812875 3.77659589794223 0.448199474208799
28.0119869969785 3.67021291490161 0.441841712766838
28.0322106126696 4.68085125378756 0.498980420230782
28.0524342283607 4.73404274530787 0.501807527388583
28.0726578440517 4.0425533555438 0.463712672386492
28.0928814597428 4.78723423682818 0.504618796037166
28.1131050754339 4.0425533555438 0.463712672386492
28.1333286911249 4.14893633858443 0.469774533230711
28.153552306816 4.46808528770631 0.487508072438874
28.173775922507 3.77659589794223 0.448199474208799
28.1939995381981 3.13829799969848 0.408571598914043
28.2142231538892 4.41489379618599 0.48459755047143
28.2344467695802 3.40425545730004 0.425531932162505
28.2546703852713 3.93617037250317 0.457570511496874
28.2748940009624 3.93617037250317 0.457570511496874
28.2951176166534 4.68085125378756 0.498980420230782
28.3153412323445 3.56382993186098 0.435391122555825
28.3355648480356 3.6170214233813 0.438628275844795
28.3557884637266 4.0425533555438 0.463712672386492
28.3760120794177 4.25531932162505 0.475759163456095
28.3962356951088 3.45744694882036 0.428843514653201
28.4164593107998 4.41489379618599 0.48459755047143
28.4366829264909 4.62765976226725 0.49613720380912
28.456906542182 3.6170214233813 0.438628275844795
28.477130157873 3.51063844034067 0.432129719910892
28.4973537735641 4.20212783010474 0.472776317979537
28.5175773892552 3.56382993186098 0.435391122555825
28.5378010049462 3.29787247425942 0.418830223061378
28.5580246206373 3.45744694882036 0.428843514653201
28.5782482363284 3.72340440642192 0.445031947067723
28.5984718520194 4.30851081314537 0.478723423682818
28.6186954677105 4.09574484706411 0.466753443803018
28.6389190834016 3.51063844034067 0.432129719910892
28.6591426990926 4.14893633858443 0.469774533230711
28.6793663147837 3.40425545730004 0.425531932162505
28.6995899304748 3.2446809827391 0.415438829407517
28.7198135461658 4.25531932162505 0.475759163456095
28.7400371618569 4.89361721986881 0.510194863610278
28.760260777548 3.82978738946255 0.451344772265282
28.780484393239 4.25531932162505 0.475759163456095
28.8007080089301 4.8404257283485 0.507414489430638
28.8209316246212 4.20212783010474 0.472776317979537
28.8411552403122 3.77659589794223 0.448199474208799
28.8613788560033 4.25531932162505 0.475759163456095
28.8816024716944 4.36170230466568 0.481669441788406
28.9018260873854 4.52127677922662 0.490401320821245
28.9220497030765 3.6170214233813 0.438628275844795
28.9422733187675 3.67021291490161 0.441841712766838
28.9624969344586 3.40425545730004 0.425531932162505
28.9827205501497 3.82978738946255 0.451344772265282
29.0029441658407 3.98936186402349 0.460651829217758
29.0231677815318 4.36170230466568 0.481669441788406
29.0433913972229 3.67021291490161 0.441841712766838
29.0636150129139 4.52127677922662 0.490401320821245
29.083838628605 4.52127677922662 0.490401320821245
29.1040622442961 4.14893633858443 0.469774533230711
29.1242858599871 3.82978738946255 0.451344772265282
29.1445094756782 4.62765976226725 0.49613720380912
29.1647330913693 4.46808528770631 0.487508072438874
29.1849567070603 4.09574484706411 0.466753443803018
29.2051803227514 3.98936186402349 0.460651829217758
29.2254039384425 4.52127677922662 0.490401320821245
29.2456275541335 5.00000020290944 0.515710644057907
29.2658511698246 4.25531932162505 0.475759163456095
29.2860747855157 3.67021291490161 0.441841712766838
29.3062984012067 3.40425545730004 0.425531932162505
29.3265220168978 4.36170230466568 0.481669441788406
29.3467456325889 3.82978738946255 0.451344772265282
29.3669692482799 4.41489379618599 0.48459755047143
29.387192863971 4.8404257283485 0.507414489430638
29.4074164796621 4.25531932162505 0.475759163456095
29.4276400953531 3.98936186402349 0.460651829217758
29.4478637110442 4.8404257283485 0.507414489430638
29.4680873267353 3.82978738946255 0.451344772265282
29.4883109424263 4.41489379618599 0.48459755047143
29.5085345581174 5.00000020290944 0.515710644057907
29.5287581738085 4.36170230466568 0.481669441788406
29.5489817894995 3.35106396577973 0.422194375282049
29.5692054051906 4.30851081314537 0.478723423682818
29.5894290208817 4.41489379618599 0.48459755047143
29.6096526365727 3.98936186402349 0.460651829217758
29.6298762522638 4.0425533555438 0.463712672386492
29.6500998679549 4.14893633858443 0.469774533230711
29.6703234836459 4.20212783010474 0.472776317979537
29.690547099337 5.42553213507194 0.537207731288247
29.710770715028 3.98936186402349 0.460651829217758
29.7309943307191 3.13829799969848 0.408571598914043
29.7512179464102 4.30851081314537 0.478723423682818
29.7714415621012 4.73404274530787 0.501807527388583
29.7916651777923 4.89361721986881 0.510194863610278
29.8118887934834 4.57446827074693 0.493277599565779
29.8321124091744 5.00000020290944 0.515710644057907
29.8523360248655 5.15957467747038 0.523875436249008
29.8725596405566 4.36170230466568 0.481669441788406
29.8927832562476 4.20212783010474 0.472776317979537
29.9130068719387 4.25531932162505 0.475759163456095
29.9332304876298 5.10638318595006 0.521168051529382
29.9534541033208 4.78723423682818 0.504618796037166
29.9736777190119 4.68085125378756 0.498980420230782
29.993901334703 4.14893633858443 0.469774533230711
30.014124950394 4.94680871138912 0.512960167678218
30.0343485660851 5.00000020290944 0.515710644057907
30.0545721817762 5.21276616899069 0.526568900976162
30.0747957974672 4.78723423682818 0.504618796037166
30.0950194131583 5.74468108419382 0.552782195061309
30.1152430288494 5.37234064355163 0.534567873881054
30.1354666445404 5.15957467747038 0.523875436249008
30.1556902602315 4.78723423682818 0.504618796037166
30.1759138759226 4.89361721986881 0.510194863610278
30.1961374916136 5.42553213507194 0.537207731288247
30.2163611073047 5.15957467747038 0.523875436249008
30.2365847229958 4.30851081314537 0.478723423682818
30.2568083386868 6.48936196547821 0.587519226884514
30.2770319543779 4.8404257283485 0.507414489430638
30.297255570069 5.05319169442975 0.518446528742142
30.31747918576 5.74468108419382 0.552782195061309
30.3377028014511 4.52127677922662 0.490401320821245
30.3579264171422 5.42553213507194 0.537207731288247
30.3781500328332 5.15957467747038 0.523875436249008
30.3983736485243 6.38297898243758 0.582683595460406
30.4185972642154 5.265957660511 0.529248658236749
30.4388208799064 5.42553213507194 0.537207731288247
30.4590444955975 4.52127677922662 0.490401320821245
30.4792681112885 4.94680871138912 0.512960167678218
30.4994917269796 5.37234064355163 0.534567873881054
30.5197153426707 5.42553213507194 0.537207731288247
30.5399389583617 4.73404274530787 0.501807527388583
30.5601625740528 5.10638318595006 0.521168051529382
30.5803861897439 5.10638318595006 0.521168051529382
30.6006098054349 5.15957467747038 0.523875436249008
30.620833421126 5.79787257571413 0.555335475138186
30.6410570368171 4.8404257283485 0.507414489430638
30.6612806525081 4.52127677922662 0.490401320821245
30.6815042681992 5.31914915203132 0.531914915203132
30.7017278838903 4.8404257283485 0.507414489430638
30.7219514995813 4.30851081314537 0.478723423682818
30.7421751152724 4.94680871138912 0.512960167678218
30.7623987309635 4.78723423682818 0.504618796037166
30.7826223466545 5.05319169442975 0.518446528742142
30.8028459623456 3.82978738946255 0.451344772265282
30.8230695780367 4.14893633858443 0.469774533230711
30.8432931937277 3.98936186402349 0.460651829217758
30.8635168094188 4.52127677922662 0.490401320821245
30.8837404251099 4.30851081314537 0.478723423682818
30.9039640408009 3.98936186402349 0.460651829217758
30.924187656492 4.68085125378756 0.498980420230782
30.9444112721831 3.35106396577973 0.422194375282049
30.9646348878741 3.77659589794223 0.448199474208799
30.9848585035652 3.82978738946255 0.451344772265282
31.0050821192563 4.41489379618599 0.48459755047143
31.0253057349473 4.0425533555438 0.463712672386492
31.0455293506384 3.82978738946255 0.451344772265282
31.0657529663295 3.93617037250317 0.457570511496874
31.0859765820205 4.89361721986881 0.510194863610278
31.1062001977116 4.09574484706411 0.466753443803018
31.1264238134027 3.6170214233813 0.438628275844795
31.1466474290937 3.51063844034067 0.432129719910892
31.1668710447848 4.14893633858443 0.469774533230711
31.1870946604759 4.46808528770631 0.487508072438874
31.2073182761669 4.62765976226725 0.49613720380912
31.227541891858 4.36170230466568 0.481669441788406
31.247765507549 4.52127677922662 0.490401320821245
31.2679891232401 4.78723423682818 0.504618796037166
31.2882127389312 3.29787247425942 0.418830223061378
31.3084363546222 4.73404274530787 0.501807527388583
31.3286599703133 4.25531932162505 0.475759163456095
31.3488835860044 4.30851081314537 0.478723423682818
31.3691072016954 3.72340440642192 0.445031947067723
31.3893308173865 3.56382993186098 0.435391122555825
31.4095544330776 4.20212783010474 0.472776317979537
31.4297780487686 4.52127677922662 0.490401320821245
31.4500016644597 3.29787247425942 0.418830223061378
31.4702252801508 4.62765976226725 0.49613720380912
31.4904488958418 4.14893633858443 0.469774533230711
31.5106725115329 4.20212783010474 0.472776317979537
31.530896127224 4.20212783010474 0.472776317979537
31.551119742915 3.67021291490161 0.441841712766838
31.5713433586061 3.82978738946255 0.451344772265282
31.5915669742972 4.0425533555438 0.463712672386492
31.6117905899882 3.67021291490161 0.441841712766838
31.6320142056793 4.14893633858443 0.469774533230711
31.6522378213704 3.88297888098286 0.454468302768581
31.6724614370614 3.98936186402349 0.460651829217758
31.6926850527525 3.2446809827391 0.415438829407517
31.7129086684436 4.14893633858443 0.469774533230711
31.7331322841346 3.82978738946255 0.451344772265282
31.7533558998257 3.35106396577973 0.422194375282049
31.7735795155168 3.82978738946255 0.451344772265282
31.7938031312078 3.67021291490161 0.441841712766838
31.8140267468989 3.19148949121879 0.412019521636212
31.83425036259 3.88297888098286 0.454468302768581
31.854473978281 3.56382993186098 0.435391122555825
31.8746975939721 3.82978738946255 0.451344772265282
31.8949212096632 4.30851081314537 0.478723423682818
31.9151448253542 4.0425533555438 0.463712672386492
31.9353684410453 4.36170230466568 0.481669441788406
31.9555920567364 3.19148949121879 0.412019521636212
31.9758156724274 3.35106396577973 0.422194375282049
31.9960392881185 4.20212783010474 0.472776317979537
32.0162629038095 2.97872352513754 0.398048674321006
32.0364865195006 4.25531932162505 0.475759163456095
32.0567101351917 3.98936186402349 0.460651829217758
32.0769337508827 5.00000020290944 0.515710644057907
32.0971573665738 3.51063844034067 0.432129719910892
32.1173809822649 3.56382993186098 0.435391122555825
32.1376045979559 3.82978738946255 0.451344772265282
32.157828213647 3.56382993186098 0.435391122555825
32.1780518293381 3.88297888098286 0.454468302768581
32.1982754450291 3.98936186402349 0.460651829217758
32.2184990607202 4.52127677922662 0.490401320821245
32.2387226764113 4.73404274530787 0.501807527388583
32.2589462921023 4.0425533555438 0.463712672386492
32.2791699077934 4.94680871138912 0.512960167678218
32.2993935234845 4.41489379618599 0.48459755047143
32.3196171391755 3.2446809827391 0.415438829407517
32.3398407548666 4.14893633858443 0.469774533230711
32.3600643705577 3.72340440642192 0.445031947067723
32.3802879862487 3.98936186402349 0.460651829217758
32.4005116019398 3.56382993186098 0.435391122555825
32.4207352176309 4.25531932162505 0.475759163456095
32.4409588333219 4.25531932162505 0.475759163456095
32.461182449013 4.68085125378756 0.498980420230782
32.4814060647041 3.77659589794223 0.448199474208799
32.5016296803951 3.29787247425942 0.418830223061378
32.5218532960862 4.25531932162505 0.475759163456095
32.5420769117773 5.37234064355163 0.534567873881054
32.5623005274683 3.77659589794223 0.448199474208799
32.5825241431594 3.82978738946255 0.451344772265282
32.6027477588505 3.82978738946255 0.451344772265282
32.6229713745415 4.14893633858443 0.469774533230711
32.6431949902326 3.67021291490161 0.441841712766838
32.6634186059237 4.46808528770631 0.487508072438874
32.6836422216147 3.88297888098286 0.454468302768581
32.7038658373058 3.67021291490161 0.441841712766838
32.7240894529969 3.67021291490161 0.441841712766838
32.7443130686879 4.20212783010474 0.472776317979537
32.764536684379 4.62765976226725 0.49613720380912
32.78476030007 3.82978738946255 0.451344772265282
32.8049839157611 4.14893633858443 0.469774533230711
32.8252075314522 3.2446809827391 0.415438829407517
32.8454311471432 4.30851081314537 0.478723423682818
32.8656547628343 3.93617037250317 0.457570511496874
32.8858783785254 3.19148949121879 0.412019521636212
32.9061019942164 4.46808528770631 0.487508072438874
32.9263256099075 3.45744694882036 0.428843514653201
32.9465492255986 3.45744694882036 0.428843514653201
32.9667728412896 3.6170214233813 0.438628275844795
32.9869964569807 4.14893633858443 0.469774533230711
33.0072200726718 3.93617037250317 0.457570511496874
33.0274436883628 3.82978738946255 0.451344772265282
33.0476673040539 3.08510650817816 0.405094330581189
33.067890919745 3.45744694882036 0.428843514653201
33.088114535436 3.51063844034067 0.432129719910892
33.1083381511271 3.56382993186098 0.435391122555825
33.1285617668182 3.88297888098286 0.454468302768581
33.1487853825092 4.62765976226725 0.49613720380912
33.1690089982003 4.94680871138912 0.512960167678218
33.1892326138914 5.10638318595006 0.521168051529382
33.2094562295824 4.14893633858443 0.469774533230711
33.2296798452735 4.8404257283485 0.507414489430638
33.2499034609646 4.52127677922662 0.490401320821245
33.2701270766556 3.03191501665785 0.401586954343472
33.2903506923467 3.88297888098286 0.454468302768581
33.3105743080378 3.51063844034067 0.432129719910892
33.3307979237288 4.14893633858443 0.469774533230711
33.3510215394199 3.51063844034067 0.432129719910892
33.371245155111 4.20212783010474 0.472776317979537
33.391468770802 4.25531932162505 0.475759163456095
33.4116923864931 3.56382993186098 0.435391122555825
33.4319160021842 4.41489379618599 0.48459755047143
33.4521396178752 4.89361721986881 0.510194863610278
33.4723632335663 3.82978738946255 0.451344772265282
33.4925868492574 4.41489379618599 0.48459755047143
33.5128104649484 3.72340440642192 0.445031947067723
33.5330340806395 3.13829799969848 0.408571598914043
33.5532576963305 3.56382993186098 0.435391122555825
33.5734813120216 3.93617037250317 0.457570511496874
33.5937049277127 3.82978738946255 0.451344772265282
33.6139285434037 3.88297888098286 0.454468302768581
33.6341521590948 3.93617037250317 0.457570511496874
33.6543757747859 4.57446827074693 0.493277599565779
33.6745993904769 3.93617037250317 0.457570511496874
33.694823006168 4.14893633858443 0.469774533230711
33.7150466218591 3.88297888098286 0.454468302768581
33.7352702375501 3.88297888098286 0.454468302768581
33.7554938532412 3.72340440642192 0.445031947067723
33.7757174689323 3.82978738946255 0.451344772265282
33.7959410846233 4.46808528770631 0.487508072438874
33.8161647003144 4.0425533555438 0.463712672386492
33.8363883160055 3.6170214233813 0.438628275844795
33.8566119316965 4.73404274530787 0.501807527388583
33.8768355473876 3.19148949121879 0.412019521636212
33.8970591630787 4.14893633858443 0.469774533230711
33.9172827787697 3.98936186402349 0.460651829217758
33.9375063944608 3.77659589794223 0.448199474208799
33.9577300101519 4.46808528770631 0.487508072438874
33.9779536258429 3.72340440642192 0.445031947067723
33.998177241534 3.56382993186098 0.435391122555825
34.0184008572251 3.77659589794223 0.448199474208799
34.0386244729161 5.10638318595006 0.521168051529382
34.0588480886072 3.98936186402349 0.460651829217758
34.0790717042983 3.98936186402349 0.460651829217758
34.0992953199893 2.97872352513754 0.398048674321006
34.1195189356804 3.56382993186098 0.435391122555825
34.1397425513715 5.21276616899069 0.526568900976162
34.1599661670625 4.73404274530787 0.501807527388583
34.1801897827536 4.14893633858443 0.469774533230711
34.2004133984447 4.41489379618599 0.48459755047143
34.2206370141357 2.44680860993441 0.360762247785373
34.2408606298268 3.45744694882036 0.428843514653201
34.2610842455179 4.09574484706411 0.466753443803018
34.2813078612089 4.25531932162505 0.475759163456095
34.3015314769 4.20212783010474 0.472776317979537
34.321755092591 4.0425533555438 0.463712672386492
34.3419787082821 3.67021291490161 0.441841712766838
34.3622023239732 3.82978738946255 0.451344772265282
34.3824259396642 4.09574484706411 0.466753443803018
34.4026495553553 4.30851081314537 0.478723423682818
34.4228731710464 3.6170214233813 0.438628275844795
34.4430967867374 3.98936186402349 0.460651829217758
34.4633204024285 4.09574484706411 0.466753443803018
34.4835440181196 4.62765976226725 0.49613720380912
34.5037676338106 4.09574484706411 0.466753443803018
34.5239912495017 3.67021291490161 0.441841712766838
34.5442148651928 3.67021291490161 0.441841712766838
34.5644384808838 3.93617037250317 0.457570511496874
34.5846620965749 3.72340440642192 0.445031947067723
34.604885712266 4.36170230466568 0.481669441788406
34.625109327957 3.82978738946255 0.451344772265282
34.6453329436481 3.77659589794223 0.448199474208799
34.6655565593392 3.67021291490161 0.441841712766838
34.6857801750302 3.6170214233813 0.438628275844795
34.7060037907213 3.77659589794223 0.448199474208799
34.7262274064124 3.93617037250317 0.457570511496874
34.7464510221034 4.14893633858443 0.469774533230711
34.7666746377945 4.41489379618599 0.48459755047143
34.7868982534856 4.62765976226725 0.49613720380912
34.8071218691766 4.52127677922662 0.490401320821245
34.8273454848677 5.74468108419382 0.552782195061309
34.8475691005588 4.78723423682818 0.504618796037166
34.8677927162498 4.52127677922662 0.490401320821245
34.8880163319409 5.42553213507194 0.537207731288247
34.908239947632 4.73404274530787 0.501807527388583
34.928463563323 5.00000020290944 0.515710644057907
34.9486871790141 4.89361721986881 0.510194863610278
34.9689107947052 4.30851081314537 0.478723423682818
34.9891344103962 4.62765976226725 0.49613720380912
35.0093580260873 4.20212783010474 0.472776317979537
35.0295816417784 5.58510660963288 0.545050594776606
35.0498052574694 6.17021301635633 0.572889896348368
35.0700288731605 3.93617037250317 0.457570511496874
35.0902524888515 4.78723423682818 0.504618796037166
35.1104761045426 5.79787257571413 0.555335475138186
35.1306997202337 4.89361721986881 0.510194863610278
35.1509233359247 5.15957467747038 0.523875436249008
35.1711469516158 4.52127677922662 0.490401320821245
35.1913705673069 4.8404257283485 0.507414489430638
35.2115941829979 5.10638318595006 0.521168051529382
35.231817798689 4.8404257283485 0.507414489430638
35.2520414143801 4.94680871138912 0.512960167678218
35.2722650300711 5.37234064355163 0.534567873881054
35.2924886457622 5.15957467747038 0.523875436249008
35.3127122614533 6.32978749091727 0.580250667943183
35.3329358771443 5.53191511811257 0.542448906438364
35.3531594928354 4.46808528770631 0.487508072438874
35.3733831085265 7.23404284676259 0.620314056540036
35.3936067242175 6.70212793155946 0.59707301148151
35.4138303399086 6.01063854179539 0.565433310857768
35.4340539555997 5.95744705027507 0.562925833709398
35.4542775712907 7.23404284676259 0.620314056540036
35.4745011869818 8.40425566020948 0.668606680855476
35.4947248026729 5.21276616899069 0.526568900976162
35.5149484183639 6.01063854179539 0.565433310857768
35.535172034055 7.50000030436416 0.631613966431975
35.5553956497461 6.70212793155946 0.59707301148151
35.5756192654371 7.55319179588447 0.633849775074574
35.5958428811282 6.8617024061204 0.604139210240542
35.6160664968193 7.50000030436416 0.631613966431975
35.6362901125103 7.23404284676259 0.620314056540036
35.6565137282014 6.64893644003915 0.594698954320119
35.6767373438925 7.44680881284384 0.629370215232479
35.6969609595835 6.8617024061204 0.604139210240542
35.7171845752746 7.02127688068134 0.611123710602471
35.7374081909657 6.54255345699852 0.5899221785364
35.7576318066567 7.71276627044541 0.640510375928879
35.7778554223478 6.48936196547821 0.587519226884514
35.7980790380389 6.59574494851883 0.59231538178515
35.8183026537299 6.91489389764071 0.606476314558303
35.838526269421 7.12765986372196 0.615736030455294
35.858749885112 6.54255345699852 0.5899221785364
35.8789735008031 6.22340450787664 0.575353950284691
35.8991971164942 6.75531942307977 0.599437666325494
35.9194207321852 6.91489389764071 0.606476314558303
35.9396443478763 6.80851091460008 0.601793029687043
35.9598679635674 6.80851091460008 0.601793029687043
35.9800915792584 5.53191511811257 0.542448906438364
36.0003151949495 5.31914915203132 0.531914915203132
36.0205388106406 5.37234064355163 0.534567873881054
36.0407624263316 5.95744705027507 0.562925833709398
36.0609860420227 5.47872362659226 0.539834679625181
36.0812096577138 6.01063854179539 0.565433310857768
36.1014332734048 5.79787257571413 0.555335475138186
36.1216568890959 4.89361721986881 0.510194863610278
36.141880504787 4.8404257283485 0.507414489430638
36.162104120478 4.20212783010474 0.472776317979537
36.1823277361691 4.94680871138912 0.512960167678218
36.2025513518602 4.30851081314537 0.478723423682818
36.2227749675512 5.6382981011532 0.547639923340591
36.2429985832423 5.15957467747038 0.523875436249008
36.2632221989334 5.00000020290944 0.515710644057907
36.2834458146244 4.20212783010474 0.472776317979537
36.3036694303155 4.46808528770631 0.487508072438874
36.3238930460066 4.20212783010474 0.472776317979537
36.3441166616976 5.15957467747038 0.523875436249008
36.3643402773887 5.05319169442975 0.518446528742142
36.3845638930798 4.09574484706411 0.466753443803018
36.4047875087708 4.14893633858443 0.469774533230711
36.4250111244619 5.05319169442975 0.518446528742142
36.445234740153 4.89361721986881 0.510194863610278
36.465458355844 5.10638318595006 0.521168051529382
36.4856819715351 3.77659589794223 0.448199474208799
36.5059055872262 4.0425533555438 0.463712672386492
36.5261292029172 4.14893633858443 0.469774533230711
36.5463528186083 4.0425533555438 0.463712672386492
36.5665764342994 4.14893633858443 0.469774533230711
36.5868000499904 4.46808528770631 0.487508072438874
36.6070236656815 4.14893633858443 0.469774533230711
36.6272472813725 3.88297888098286 0.454468302768581
36.6474708970636 3.88297888098286 0.454468302768581
36.6676945127547 3.98936186402349 0.460651829217758
36.6879181284457 4.20212783010474 0.472776317979537
36.7081417441368 4.25531932162505 0.475759163456095
36.7283653598279 3.93617037250317 0.457570511496874
36.7485889755189 4.20212783010474 0.472776317979537
36.76881259121 3.72340440642192 0.445031947067723
36.7890362069011 4.30851081314537 0.478723423682818
36.8092598225921 4.25531932162505 0.475759163456095
36.8294834382832 4.52127677922662 0.490401320821245
36.8497070539743 4.14893633858443 0.469774533230711
36.8699306696653 3.67021291490161 0.441841712766838
36.8901542853564 3.98936186402349 0.460651829217758
36.9103779010475 3.98936186402349 0.460651829217758
36.9306015167385 3.98936186402349 0.460651829217758
36.9508251324296 4.89361721986881 0.510194863610278
36.9710487481207 3.6170214233813 0.438628275844795
36.9912723638117 3.72340440642192 0.445031947067723
37.0114959795028 3.82978738946255 0.451344772265282
37.0317195951939 4.0425533555438 0.463712672386492
37.0519432108849 3.77659589794223 0.448199474208799
37.072166826576 4.52127677922662 0.490401320821245
37.0923904422671 4.09574484706411 0.466753443803018
37.1126140579581 2.97872352513754 0.398048674321006
37.1328376736492 4.41489379618599 0.48459755047143
37.1530612893403 3.45744694882036 0.428843514653201
37.1732849050313 4.14893633858443 0.469774533230711
37.1935085207224 4.30851081314537 0.478723423682818
37.2137321364135 3.13829799969848 0.408571598914043
37.2339557521045 3.98936186402349 0.460651829217758
37.2541793677956 2.97872352513754 0.398048674321006
37.2744029834867 3.77659589794223 0.448199474208799
37.2946265991777 3.67021291490161 0.441841712766838
37.3148502148688 3.72340440642192 0.445031947067723
37.3350738305599 3.88297888098286 0.454468302768581
37.3552974462509 5.15957467747038 0.523875436249008
37.375521061942 3.93617037250317 0.457570511496874
37.395744677633 3.51063844034067 0.432129719910892
37.4159682933241 3.35106396577973 0.422194375282049
37.4361919090152 3.98936186402349 0.460651829217758
37.4564155247062 3.40425545730004 0.425531932162505
37.4766391403973 3.93617037250317 0.457570511496874
37.4968627560884 3.51063844034067 0.432129719910892
37.5170863717794 3.03191501665785 0.401586954343472
37.5373099874705 3.45744694882036 0.428843514653201
37.5575336031616 3.19148949121879 0.412019521636212
37.5777572188526 4.46808528770631 0.487508072438874
37.5979808345437 3.67021291490161 0.441841712766838
37.6182044502348 3.88297888098286 0.454468302768581
37.6384280659258 3.82978738946255 0.451344772265282
37.6586516816169 4.20212783010474 0.472776317979537
37.678875297308 3.72340440642192 0.445031947067723
37.699098912999 3.93617037250317 0.457570511496874
37.7193225286901 4.36170230466568 0.481669441788406
37.7395461443812 3.67021291490161 0.441841712766838
37.7597697600722 3.98936186402349 0.460651829217758
37.7799933757633 3.77659589794223 0.448199474208799
37.8002169914544 3.03191501665785 0.401586954343472
37.8204406071454 3.72340440642192 0.445031947067723
37.8406642228365 4.20212783010474 0.472776317979537
37.8608878385276 2.97872352513754 0.398048674321006
37.8811114542186 3.45744694882036 0.428843514653201
37.9013350699097 3.19148949121879 0.412019521636212
37.9215586856008 3.82978738946255 0.451344772265282
37.9417823012918 4.09574484706411 0.466753443803018
37.9620059169829 3.35106396577973 0.422194375282049
37.982229532674 4.36170230466568 0.481669441788406
38.002453148365 3.98936186402349 0.460651829217758
38.0226767640561 4.0425533555438 0.463712672386492
38.0429003797472 3.45744694882036 0.428843514653201
38.0631239954382 3.67021291490161 0.441841712766838
38.0833476111293 4.20212783010474 0.472776317979537
38.1035712268204 3.35106396577973 0.422194375282049
38.1237948425114 3.82978738946255 0.451344772265282
38.1440184582025 3.93617037250317 0.457570511496874
38.1642420738935 4.09574484706411 0.466753443803018
38.1844656895846 3.2446809827391 0.415438829407517
38.2046893052757 4.09574484706411 0.466753443803018
38.2249129209667 3.88297888098286 0.454468302768581
38.2451365366578 3.6170214233813 0.438628275844795
38.2653601523489 3.67021291490161 0.441841712766838
38.2855837680399 3.72340440642192 0.445031947067723
38.305807383731 3.98936186402349 0.460651829217758
38.3260309994221 4.14893633858443 0.469774533230711
38.3462546151131 3.35106396577973 0.422194375282049
38.3664782308042 4.68085125378756 0.498980420230782
38.3867018464953 3.77659589794223 0.448199474208799
38.4069254621863 3.72340440642192 0.445031947067723
38.4271490778774 3.03191501665785 0.401586954343472
38.4473726935685 3.77659589794223 0.448199474208799
38.4675963092595 3.82978738946255 0.451344772265282
38.4878199249506 4.46808528770631 0.487508072438874
38.5080435406417 3.13829799969848 0.408571598914043
38.5282671563327 2.87234054209691 0.390876038647036
38.5484907720238 3.72340440642192 0.445031947067723
38.5687143877149 2.71276606753597 0.37986322969976
38.5889380034059 3.6170214233813 0.438628275844795
38.609161619097 2.87234054209691 0.390876038647036
38.6293852347881 3.98936186402349 0.460651829217758
38.6496088504791 4.09574484706411 0.466753443803018
38.6698324661702 4.41489379618599 0.48459755047143
38.6900560818613 4.41489379618599 0.48459755047143
38.7102796975523 3.40425545730004 0.425531932162505
38.7305033132434 3.19148949121879 0.412019521636212
38.7507269289345 4.73404274530787 0.501807527388583
38.7709505446255 4.30851081314537 0.478723423682818
38.7911741603166 3.6170214233813 0.438628275844795
38.8113977760077 3.88297888098286 0.454468302768581
38.8316213916987 3.51063844034067 0.432129719910892
38.8518450073898 3.29787247425942 0.418830223061378
38.8720686230809 3.67021291490161 0.441841712766838
38.8922922387719 3.19148949121879 0.412019521636212
38.912515854463 4.30851081314537 0.478723423682818
38.932739470154 3.72340440642192 0.445031947067723
38.9529630858451 3.72340440642192 0.445031947067723
38.9731867015362 4.14893633858443 0.469774533230711
38.9934103172272 3.45744694882036 0.428843514653201
39.0136339329183 3.45744694882036 0.428843514653201
39.0338575486094 3.29787247425942 0.418830223061378
39.0540811643004 3.51063844034067 0.432129719910892
39.0743047799915 3.72340440642192 0.445031947067723
39.0945283956826 2.60638308449535 0.372340440642192
39.1147520113736 3.2446809827391 0.415438829407517
39.1349756270647 3.13829799969848 0.408571598914043
39.1551992427558 2.60638308449535 0.372340440642192
39.1754228584468 3.67021291490161 0.441841712766838
39.1956464741379 3.77659589794223 0.448199474208799
39.215870089829 3.45744694882036 0.428843514653201
39.23609370552 3.82978738946255 0.451344772265282
39.2563173212111 4.09574484706411 0.466753443803018
39.2765409369022 4.30851081314537 0.478723423682818
39.2967645525932 3.40425545730004 0.425531932162505
39.3169881682843 2.55319159297503 0.368521463374206
39.3372117839754 3.56382993186098 0.435391122555825
39.3574353996664 4.09574484706411 0.466753443803018
39.3776590153575 3.51063844034067 0.432129719910892
39.3978826310486 3.93617037250317 0.457570511496874
39.4181062467396 3.13829799969848 0.408571598914043
39.4383298624307 3.56382993186098 0.435391122555825
39.4585534781218 3.72340440642192 0.445031947067723
39.4787770938128 3.2446809827391 0.415438829407517
39.4990007095039 3.40425545730004 0.425531932162505
39.519224325195 3.35106396577973 0.422194375282049
39.539447940886 3.45744694882036 0.428843514653201
39.5596715565771 2.97872352513754 0.398048674321006
39.5798951722682 3.72340440642192 0.445031947067723
39.6001187879592 3.45744694882036 0.428843514653201
39.6203424036503 3.67021291490161 0.441841712766838
39.6405660193414 4.0425533555438 0.463712672386492
39.6607896350324 3.93617037250317 0.457570511496874
39.6810132507235 4.09574484706411 0.466753443803018
39.7012368664145 3.98936186402349 0.460651829217758
39.7214604821056 3.29787247425942 0.418830223061378
39.7416840977967 4.0425533555438 0.463712672386492
39.7619077134877 2.92553203361722 0.394478658939308
39.7821313291788 3.40425545730004 0.425531932162505
39.8023549448699 3.29787247425942 0.418830223061378
39.8225785605609 4.09574484706411 0.466753443803018
39.842802176252 3.45744694882036 0.428843514653201
39.8630257919431 3.6170214233813 0.438628275844795
39.8832494076341 3.35106396577973 0.422194375282049
39.9034730233252 3.03191501665785 0.401586954343472
39.9236966390163 3.40425545730004 0.425531932162505
39.9439202547073 2.92553203361722 0.394478658939308
39.9641438703984 3.82978738946255 0.451344772265282
39.9843674860895 4.68085125378756 0.498980420230782
40.0045911017805 3.6170214233813 0.438628275844795
40.0248147174716 3.45744694882036 0.428843514653201
40.0450383331627 3.29787247425942 0.418830223061378
40.0652619488537 3.82978738946255 0.451344772265282
40.0854855645448 4.94680871138912 0.512960167678218
40.1057091802359 3.77659589794223 0.448199474208799
40.1259327959269 3.45744694882036 0.428843514653201
40.146156411618 3.72340440642192 0.445031947067723
40.1663800273091 2.60638308449535 0.372340440642192
40.1866036430001 3.56382993186098 0.435391122555825
40.2068272586912 3.19148949121879 0.412019521636212
40.2270508743823 4.0425533555438 0.463712672386492
40.2472744900733 3.45744694882036 0.428843514653201
40.2674981057644 3.82978738946255 0.451344772265282
40.2877217214555 3.40425545730004 0.425531932162505
40.3079453371465 3.40425545730004 0.425531932162505
40.3281689528376 3.29787247425942 0.418830223061378
40.3483925685287 4.0425533555438 0.463712672386492
40.3686161842197 3.98936186402349 0.460651829217758
40.3888397999108 4.36170230466568 0.481669441788406
40.4090634156019 3.82978738946255 0.451344772265282
40.4292870312929 4.30851081314537 0.478723423682818
40.449510646984 3.67021291490161 0.441841712766838
40.469734262675 3.51063844034067 0.432129719910892
40.4899578783661 4.09574484706411 0.466753443803018
40.5101814940572 3.77659589794223 0.448199474208799
40.5304051097482 3.03191501665785 0.401586954343472
40.5506287254393 3.56382993186098 0.435391122555825
40.5708523411304 3.40425545730004 0.425531932162505
40.5910759568214 2.97872352513754 0.398048674321006
40.6112995725125 4.30851081314537 0.478723423682818
40.6315231882036 3.77659589794223 0.448199474208799
40.6517468038946 2.8191490505766 0.387239903442613
40.6719704195857 3.19148949121879 0.412019521636212
40.6921940352768 3.67021291490161 0.441841712766838
40.7124176509678 3.72340440642192 0.445031947067723
40.7326412666589 3.45744694882036 0.428843514653201
40.75286488235 4.20212783010474 0.472776317979537
40.773088498041 3.29787247425942 0.418830223061378
40.7933121137321 3.03191501665785 0.401586954343472
40.8135357294232 3.51063844034067 0.432129719910892
40.8337593451142 3.82978738946255 0.451344772265282
40.8539829608053 2.8191490505766 0.387239903442613
40.8742065764964 3.13829799969848 0.408571598914043
40.8944301921874 3.77659589794223 0.448199474208799
40.9146538078785 2.92553203361722 0.394478658939308
40.9348774235696 3.35106396577973 0.422194375282049
40.9551010392606 3.72340440642192 0.445031947067723
40.9753246549517 3.45744694882036 0.428843514653201
40.9955482706428 3.35106396577973 0.422194375282049
41.0157718863338 3.19148949121879 0.412019521636212
41.0359955020249 3.19148949121879 0.412019521636212
41.056219117716 3.19148949121879 0.412019521636212
41.076442733407 3.51063844034067 0.432129719910892
41.0966663490981 3.93617037250317 0.457570511496874
41.1168899647892 3.6170214233813 0.438628275844795
41.1371135804802 3.45744694882036 0.428843514653201
41.1573371961713 4.0425533555438 0.463712672386492
41.1775608118624 3.45744694882036 0.428843514653201
41.1977844275534 3.35106396577973 0.422194375282049
41.2180080432445 4.0425533555438 0.463712672386492
41.2382316589355 3.88297888098286 0.454468302768581
41.2584552746266 3.88297888098286 0.454468302768581
41.2786788903177 3.19148949121879 0.412019521636212
41.2989025060087 3.67021291490161 0.441841712766838
41.3191261216998 2.97872352513754 0.398048674321006
41.3393497373909 2.92553203361722 0.394478658939308
41.3595733530819 3.19148949121879 0.412019521636212
41.379796968773 3.88297888098286 0.454468302768581
41.4000205844641 3.88297888098286 0.454468302768581
41.4202442001551 3.35106396577973 0.422194375282049
41.4404678158462 3.51063844034067 0.432129719910892
41.4606914315373 3.29787247425942 0.418830223061378
41.4809150472283 2.97872352513754 0.398048674321006
41.5011386629194 3.82978738946255 0.451344772265282
41.5213622786105 2.87234054209691 0.390876038647036
41.5415858943015 3.40425545730004 0.425531932162505
41.5618095099926 3.77659589794223 0.448199474208799
41.5820331256837 3.72340440642192 0.445031947067723
41.6022567413747 3.35106396577973 0.422194375282049
41.6224803570658 4.09574484706411 0.466753443803018
41.6427039727569 3.51063844034067 0.432129719910892
41.6629275884479 3.40425545730004 0.425531932162505
41.683151204139 3.6170214233813 0.438628275844795
41.7033748198301 4.0425533555438 0.463712672386492
41.7235984355211 3.19148949121879 0.412019521636212
41.7438220512122 3.35106396577973 0.422194375282049
41.7640456669033 2.65957457601566 0.376120643554402
41.7842692825943 3.88297888098286 0.454468302768581
41.8044928982854 4.41489379618599 0.48459755047143
41.8247165139765 3.56382993186098 0.435391122555825
41.8449401296675 3.2446809827391 0.415438829407517
41.8651637453586 3.82978738946255 0.451344772265282
41.8853873610497 3.40425545730004 0.425531932162505
41.9056109767407 3.45744694882036 0.428843514653201
41.9258345924318 4.41489379618599 0.48459755047143
41.9460582081228 3.29787247425942 0.418830223061378
41.9662818238139 3.45744694882036 0.428843514653201
41.986505439505 4.14893633858443 0.469774533230711
42.006729055196 3.98936186402349 0.460651829217758
42.0269526708871 3.40425545730004 0.425531932162505
42.0471762865782 4.36170230466568 0.481669441788406
42.0673999022692 3.29787247425942 0.418830223061378
42.0876235179603 3.2446809827391 0.415438829407517
42.1078471336514 3.51063844034067 0.432129719910892
42.1280707493424 4.46808528770631 0.487508072438874
42.1482943650335 3.67021291490161 0.441841712766838
42.1685179807246 3.03191501665785 0.401586954343472
42.1887415964156 2.97872352513754 0.398048674321006
42.2089652121067 4.0425533555438 0.463712672386492
42.2291888277978 3.6170214233813 0.438628275844795
42.2494124434888 3.2446809827391 0.415438829407517
42.2696360591799 3.35106396577973 0.422194375282049
42.289859674871 3.13829799969848 0.408571598914043
42.310083290562 3.56382993186098 0.435391122555825
42.3303069062531 3.29787247425942 0.418830223061378
42.3505305219442 3.40425545730004 0.425531932162505
42.3707541376352 3.08510650817816 0.405094330581189
42.3909777533263 3.45744694882036 0.428843514653201
42.4112013690174 2.97872352513754 0.398048674321006
42.4314249847084 3.29787247425942 0.418830223061378
42.4516486003995 3.67021291490161 0.441841712766838
42.4718722160906 3.77659589794223 0.448199474208799
42.4920958317816 3.40425545730004 0.425531932162505
42.5123194474727 3.93617037250317 0.457570511496874
42.5325430631638 4.52127677922662 0.490401320821245
42.5527666788548 3.67021291490161 0.441841712766838
42.5729902945459 4.68085125378756 0.498980420230782
42.593213910237 3.77659589794223 0.448199474208799
42.613437525928 2.8191490505766 0.387239903442613
42.6336611416191 3.77659589794223 0.448199474208799
42.6538847573102 3.08510650817816 0.405094330581189
42.6741083730012 4.14893633858443 0.469774533230711
42.6943319886923 3.56382993186098 0.435391122555825
42.7145556043833 3.56382993186098 0.435391122555825
42.7347792200744 3.77659589794223 0.448199474208799
42.7550028357655 3.6170214233813 0.438628275844795
42.7752264514565 2.97872352513754 0.398048674321006
42.7954500671476 3.88297888098286 0.454468302768581
42.8156736828387 3.19148949121879 0.412019521636212
42.8358972985297 3.56382993186098 0.435391122555825
42.8561209142208 4.14893633858443 0.469774533230711
42.8763445299119 3.45744694882036 0.428843514653201
42.8965681456029 4.36170230466568 0.481669441788406
42.916791761294 3.6170214233813 0.438628275844795
42.9370153769851 3.45744694882036 0.428843514653201
42.9572389926761 3.67021291490161 0.441841712766838
42.9774626083672 3.45744694882036 0.428843514653201
42.9976862240583 3.6170214233813 0.438628275844795
43.0179098397493 3.82978738946255 0.451344772265282
43.0381334554404 4.30851081314537 0.478723423682818
43.0583570711315 3.19148949121879 0.412019521636212
43.0785806868225 4.0425533555438 0.463712672386492
43.0988043025136 4.30851081314537 0.478723423682818
43.1190279182047 3.67021291490161 0.441841712766838
43.1392515338957 3.72340440642192 0.445031947067723
43.1594751495868 3.40425545730004 0.425531932162505
43.1796987652779 4.20212783010474 0.472776317979537
43.1999223809689 4.14893633858443 0.469774533230711
43.22014599666 3.88297888098286 0.454468302768581
43.2403696123511 4.09574484706411 0.466753443803018
43.2605932280421 3.67021291490161 0.441841712766838
43.2808168437332 3.56382993186098 0.435391122555825
43.3010404594243 3.51063844034067 0.432129719910892
43.3212640751153 3.45744694882036 0.428843514653201
43.3414876908064 4.78723423682818 0.504618796037166
43.3617113064975 4.36170230466568 0.481669441788406
43.3819349221885 3.56382993186098 0.435391122555825
43.4021585378796 3.40425545730004 0.425531932162505
43.4223821535707 3.45744694882036 0.428843514653201
43.4426057692617 4.09574484706411 0.466753443803018
43.4628293849528 3.82978738946255 0.451344772265282
43.4830530006438 3.82978738946255 0.451344772265282
43.5032766163349 4.8404257283485 0.507414489430638
43.523500232026 3.72340440642192 0.445031947067723
43.543723847717 3.13829799969848 0.408571598914043
43.5639474634081 4.46808528770631 0.487508072438874
43.5841710790992 4.09574484706411 0.466753443803018
43.6043946947902 3.2446809827391 0.415438829407517
43.6246183104813 3.40425545730004 0.425531932162505
43.6448419261724 3.08510650817816 0.405094330581189
43.6650655418634 3.98936186402349 0.460651829217758
43.6852891575545 3.40425545730004 0.425531932162505
43.7055127732456 4.30851081314537 0.478723423682818
43.7257363889366 3.88297888098286 0.454468302768581
43.7459600046277 4.36170230466568 0.481669441788406
43.7661836203188 3.56382993186098 0.435391122555825
43.7864072360098 3.08510650817816 0.405094330581189
43.8066308517009 3.6170214233813 0.438628275844795
43.826854467392 4.09574484706411 0.466753443803018
43.847078083083 3.93617037250317 0.457570511496874
43.8673016987741 4.09574484706411 0.466753443803018
43.8875253144652 2.97872352513754 0.398048674321006
43.9077489301562 3.88297888098286 0.454468302768581
43.9279725458473 4.25531932162505 0.475759163456095
43.9481961615384 3.67021291490161 0.441841712766838
43.9684197772294 2.39361711841409 0.356819372592072
43.9886433929205 3.40425545730004 0.425531932162505
44.0088670086116 3.6170214233813 0.438628275844795
44.0290906243026 3.13829799969848 0.408571598914043
44.0493142399937 3.13829799969848 0.408571598914043
44.0695378556848 3.45744694882036 0.428843514653201
44.0897614713758 4.14893633858443 0.469774533230711
44.1099850870669 3.03191501665785 0.401586954343472
44.130208702758 3.35106396577973 0.422194375282049
44.150432318449 2.8191490505766 0.387239903442613
44.1706559341401 3.6170214233813 0.438628275844795
44.1908795498312 3.56382993186098 0.435391122555825
44.2111031655222 3.56382993186098 0.435391122555825
44.2313267812133 3.08510650817816 0.405094330581189
44.2515503969043 3.2446809827391 0.415438829407517
44.2717740125954 3.51063844034067 0.432129719910892
44.2919976282865 2.60638308449535 0.372340440642192
44.3122212439775 3.82978738946255 0.451344772265282
44.3324448596686 4.0425533555438 0.463712672386492
44.3526684753597 3.03191501665785 0.401586954343472
44.3728920910507 3.40425545730004 0.425531932162505
44.3931157067418 3.82978738946255 0.451344772265282
44.4133393224329 2.71276606753597 0.37986322969976
44.4335629381239 2.97872352513754 0.398048674321006
44.453786553815 3.29787247425942 0.418830223061378
44.4740101695061 4.25531932162505 0.475759163456095
44.4942337851971 4.20212783010474 0.472776317979537
44.5144574008882 3.56382993186098 0.435391122555825
44.5346810165793 3.6170214233813 0.438628275844795
44.5549046322703 3.35106396577973 0.422194375282049
44.5751282479614 3.93617037250317 0.457570511496874
44.5953518636525 3.51063844034067 0.432129719910892
44.6155754793435 3.82978738946255 0.451344772265282
44.6357990950346 3.98936186402349 0.460651829217758
44.6560227107257 3.40425545730004 0.425531932162505
44.6762463264167 3.56382993186098 0.435391122555825
44.6964699421078 2.76595755905628 0.383569300189794
44.7166935577989 3.19148949121879 0.412019521636212
44.7369171734899 4.46808528770631 0.487508072438874
44.757140789181 3.29787247425942 0.418830223061378
44.7773644048721 2.60638308449535 0.372340440642192
44.7975880205631 3.45744694882036 0.428843514653201
44.8178116362542 3.88297888098286 0.454468302768581
44.8380352519453 3.77659589794223 0.448199474208799
44.8582588676363 4.57446827074693 0.493277599565779
44.8784824833274 2.87234054209691 0.390876038647036
44.8987060990185 3.08510650817816 0.405094330581189
44.9189297147095 3.35106396577973 0.422194375282049
44.9391533304006 3.56382993186098 0.435391122555825
44.9593769460917 3.6170214233813 0.438628275844795
44.9796005617827 3.51063844034067 0.432129719910892
44.9998241774738 3.19148949121879 0.412019521636212
45.0200477931648 3.2446809827391 0.415438829407517
45.0402714088559 3.56382993186098 0.435391122555825
45.060495024547 3.19148949121879 0.412019521636212
45.080718640238 3.72340440642192 0.445031947067723
45.1009422559291 3.2446809827391 0.415438829407517
45.1211658716202 3.40425545730004 0.425531932162505
45.1413894873112 3.45744694882036 0.428843514653201
45.1616131030023 3.03191501665785 0.401586954343472
45.1818367186934 3.08510650817816 0.405094330581189
45.2020603343844 3.13829799969848 0.408571598914043
45.2222839500755 3.56382993186098 0.435391122555825
45.2425075657666 2.8191490505766 0.387239903442613
45.2627311814576 3.82978738946255 0.451344772265282
45.2829547971487 3.51063844034067 0.432129719910892
45.3031784128398 2.39361711841409 0.356819372592072
45.3234020285308 3.35106396577973 0.422194375282049
45.3436256442219 2.55319159297503 0.368521463374206
45.363849259913 3.98936186402349 0.460651829217758
45.384072875604 2.97872352513754 0.398048674321006
45.4042964912951 2.65957457601566 0.376120643554402
45.4245201069862 3.51063844034067 0.432129719910892
45.4447437226772 2.34042562689378 0.352832438824499
45.4649673383683 3.82978738946255 0.451344772265282
45.4851909540594 3.93617037250317 0.457570511496874
45.5054145697504 3.77659589794223 0.448199474208799
45.5256381854415 3.67021291490161 0.441841712766838
45.5458618011326 4.0425533555438 0.463712672386492
45.5660854168236 3.2446809827391 0.415438829407517
45.5863090325147 3.40425545730004 0.425531932162505
45.6065326482058 2.92553203361722 0.394478658939308
45.6267562638968 3.19148949121879 0.412019521636212
45.6469798795879 3.88297888098286 0.454468302768581
45.667203495279 3.2446809827391 0.415438829407517
45.68742711097 3.2446809827391 0.415438829407517
45.7076507266611 2.76595755905628 0.383569300189794
45.7278743423522 2.92553203361722 0.394478658939308
45.7480979580432 2.92553203361722 0.394478658939308
45.7683215737343 3.88297888098286 0.454468302768581
45.7885451894253 2.8191490505766 0.387239903442613
45.8087688051164 3.98936186402349 0.460651829217758
45.8289924208075 3.77659589794223 0.448199474208799
45.8492160364985 3.19148949121879 0.412019521636212
45.8694396521896 3.19148949121879 0.412019521636212
45.8896632678807 3.13829799969848 0.408571598914043
45.9098868835717 3.08510650817816 0.405094330581189
45.9301104992628 3.08510650817816 0.405094330581189
45.9503341149539 2.71276606753597 0.37986322969976
45.9705577306449 3.72340440642192 0.445031947067723
45.990781346336 3.19148949121879 0.412019521636212
46.0110049620271 4.41489379618599 0.48459755047143
46.0312285777181 2.97872352513754 0.398048674321006
46.0514521934092 3.88297888098286 0.454468302768581
46.0716758091003 3.77659589794223 0.448199474208799
46.0918994247913 2.8191490505766 0.387239903442613
46.1121230404824 3.82978738946255 0.451344772265282
46.1323466561735 3.67021291490161 0.441841712766838
46.1525702718645 3.93617037250317 0.457570511496874
46.1727938875556 2.92553203361722 0.394478658939308
46.1930175032467 3.19148949121879 0.412019521636212
46.2132411189377 3.13829799969848 0.408571598914043
46.2334647346288 2.87234054209691 0.390876038647036
46.2536883503199 3.35106396577973 0.422194375282049
46.2739119660109 3.6170214233813 0.438628275844795
46.294135581702 3.51063844034067 0.432129719910892
46.3143591973931 3.13829799969848 0.408571598914043
46.3345828130841 3.19148949121879 0.412019521636212
46.3548064287752 3.03191501665785 0.401586954343472
46.3750300444663 2.76595755905628 0.383569300189794
46.3952536601573 3.35106396577973 0.422194375282049
46.4154772758484 3.6170214233813 0.438628275844795
46.4357008915395 3.2446809827391 0.415438829407517
46.4559245072305 3.56382993186098 0.435391122555825
46.4761481229216 3.19148949121879 0.412019521636212
46.4963717386127 4.09574484706411 0.466753443803018
46.5165953543037 3.6170214233813 0.438628275844795
46.5368189699948 3.2446809827391 0.415438829407517
46.5570425856858 3.19148949121879 0.412019521636212
46.5772662013769 3.82978738946255 0.451344772265282
46.597489817068 3.29787247425942 0.418830223061378
46.617713432759 3.35106396577973 0.422194375282049
46.6379370484501 2.8191490505766 0.387239903442613
46.6581606641412 3.51063844034067 0.432129719910892
46.6783842798322 3.82978738946255 0.451344772265282
46.6986078955233 3.77659589794223 0.448199474208799
46.7188315112144 2.87234054209691 0.390876038647036
46.7390551269054 3.35106396577973 0.422194375282049
46.7592787425965 3.29787247425942 0.418830223061378
46.7795023582876 3.2446809827391 0.415438829407517
46.7997259739786 3.19148949121879 0.412019521636212
46.8199495896697 2.92553203361722 0.394478658939308
46.8401732053608 3.19148949121879 0.412019521636212
46.8603968210518 3.45744694882036 0.428843514653201
46.8806204367429 2.97872352513754 0.398048674321006
46.900844052434 3.2446809827391 0.415438829407517
46.921067668125 3.03191501665785 0.401586954343472
46.9412912838161 3.77659589794223 0.448199474208799
46.9615148995072 3.40425545730004 0.425531932162505
46.9817385151982 3.6170214233813 0.438628275844795
47.0019621308893 3.13829799969848 0.408571598914043
47.0221857465804 2.97872352513754 0.398048674321006
47.0424093622714 3.82978738946255 0.451344772265282
47.0626329779625 2.8191490505766 0.387239903442613
47.0828565936536 3.82978738946255 0.451344772265282
47.1030802093446 3.29787247425942 0.418830223061378
47.1233038250357 3.03191501665785 0.401586954343472
47.1435274407268 3.45744694882036 0.428843514653201
47.1637510564178 2.50000010145472 0.364662493543428
47.1839746721089 3.08510650817816 0.405094330581189
47.2041982878 3.72340440642192 0.445031947067723
47.224421903491 3.13829799969848 0.408571598914043
47.2446455191821 3.08510650817816 0.405094330581189
47.2648691348732 4.0425533555438 0.463712672386492
47.2850927505642 2.8191490505766 0.387239903442613
47.3053163662553 4.0425533555438 0.463712672386492
47.3255399819463 3.56382993186098 0.435391122555825
47.3457635976374 3.77659589794223 0.448199474208799
47.3659872133285 3.93617037250317 0.457570511496874
47.3862108290195 3.29787247425942 0.418830223061378
47.4064344447106 3.45744694882036 0.428843514653201
47.4266580604017 3.40425545730004 0.425531932162505
47.4468816760927 3.19148949121879 0.412019521636212
47.4671052917838 3.2446809827391 0.415438829407517
47.4873289074749 3.13829799969848 0.408571598914043
47.5075525231659 3.2446809827391 0.415438829407517
47.527776138857 2.87234054209691 0.390876038647036
47.5479997545481 2.87234054209691 0.390876038647036
47.5682233702391 2.8191490505766 0.387239903442613
47.5884469859302 2.87234054209691 0.390876038647036
47.6086706016213 3.51063844034067 0.432129719910892
47.6288942173123 2.97872352513754 0.398048674321006
47.6491178330034 3.6170214233813 0.438628275844795
47.6693414486945 3.35106396577973 0.422194375282049
47.6895650643855 3.93617037250317 0.457570511496874
47.7097886800766 4.20212783010474 0.472776317979537
47.7300122957677 3.08510650817816 0.405094330581189
47.7502359114587 3.19148949121879 0.412019521636212
47.7704595271498 4.0425533555438 0.463712672386492
47.7906831428409 3.19148949121879 0.412019521636212
47.8109067585319 2.92553203361722 0.394478658939308
47.831130374223 2.44680860993441 0.360762247785373
47.8513539899141 3.72340440642192 0.445031947067723
47.8715776056051 3.35106396577973 0.422194375282049
47.8918012212962 3.45744694882036 0.428843514653201
47.9120248369873 3.2446809827391 0.415438829407517
47.9322484526783 3.51063844034067 0.432129719910892
47.9524720683694 2.87234054209691 0.390876038647036
47.9726956840605 3.6170214233813 0.438628275844795
47.9929192997515 2.76595755905628 0.383569300189794
48.0131429154426 3.19148949121879 0.412019521636212
48.0333665311337 3.40425545730004 0.425531932162505
48.0535901468247 2.44680860993441 0.360762247785373
48.0738137625158 3.98936186402349 0.460651829217758
48.0940373782068 3.29787247425942 0.418830223061378
48.1142609938979 4.30851081314537 0.478723423682818
48.134484609589 3.40425545730004 0.425531932162505
48.15470822528 3.40425545730004 0.425531932162505
48.1749318409711 3.82978738946255 0.451344772265282
48.1951554566622 2.39361711841409 0.356819372592072
48.2153790723532 3.40425545730004 0.425531932162505
48.2356026880443 3.08510650817816 0.405094330581189
48.2558263037354 3.77659589794223 0.448199474208799
48.2760499194264 3.82978738946255 0.451344772265282
48.2962735351175 3.67021291490161 0.441841712766838
48.3164971508086 2.71276606753597 0.37986322969976
48.3367207664996 2.55319159297503 0.368521463374206
48.3569443821907 2.76595755905628 0.383569300189794
48.3771679978818 2.60638308449535 0.372340440642192
48.3973916135728 3.98936186402349 0.460651829217758
48.4176152292639 3.29787247425942 0.418830223061378
48.437838844955 2.97872352513754 0.398048674321006
48.458062460646 2.44680860993441 0.360762247785373
48.4782860763371 3.19148949121879 0.412019521636212
48.4985096920282 3.56382993186098 0.435391122555825
48.5187333077192 2.97872352513754 0.398048674321006
48.5389569234103 2.92553203361722 0.394478658939308
48.5591805391014 3.03191501665785 0.401586954343472
48.5794041547924 2.76595755905628 0.383569300189794
48.5996277704835 3.29787247425942 0.418830223061378
48.6198513861746 3.35106396577973 0.422194375282049
48.6400750018656 2.8191490505766 0.387239903442613
48.6602986175567 3.19148949121879 0.412019521636212
48.6805222332478 3.72340440642192 0.445031947067723
48.7007458489388 3.03191501665785 0.401586954343472
48.7209694646299 2.97872352513754 0.398048674321006
48.741193080321 2.76595755905628 0.383569300189794
48.761416696012 2.76595755905628 0.383569300189794
48.7816403117031 3.72340440642192 0.445031947067723
48.8018639273942 2.60638308449535 0.372340440642192
48.8220875430852 3.45744694882036 0.428843514653201
48.8423111587763 2.8191490505766 0.387239903442613
48.8625347744673 3.72340440642192 0.445031947067723
48.8827583901584 3.51063844034067 0.432129719910892
48.9029820058495 4.25531932162505 0.475759163456095
48.9232056215405 3.35106396577973 0.422194375282049
48.9434292372316 2.97872352513754 0.398048674321006
48.9636528529227 3.45744694882036 0.428843514653201
48.9838764686137 3.40425545730004 0.425531932162505
49.0041000843048 2.97872352513754 0.398048674321006
49.0243236999959 3.93617037250317 0.457570511496874
49.0445473156869 2.55319159297503 0.368521463374206
49.064770931378 2.39361711841409 0.356819372592072
49.0849945470691 3.2446809827391 0.415438829407517
49.1052181627601 3.93617037250317 0.457570511496874
49.1254417784512 4.14893633858443 0.469774533230711
49.1456653941423 3.45744694882036 0.428843514653201
49.1658890098333 3.56382993186098 0.435391122555825
49.1861126255244 3.40425545730004 0.425531932162505
49.2063362412155 3.2446809827391 0.415438829407517
49.2265598569065 3.51063844034067 0.432129719910892
49.2467834725976 3.2446809827391 0.415438829407517
49.2670070882887 3.03191501665785 0.401586954343472
49.2872307039797 3.08510650817816 0.405094330581189
49.3074543196708 3.03191501665785 0.401586954343472
49.3276779353619 3.6170214233813 0.438628275844795
49.3479015510529 3.08510650817816 0.405094330581189
49.368125166744 2.76595755905628 0.383569300189794
49.3883487824351 3.93617037250317 0.457570511496874
49.4085723981261 3.6170214233813 0.438628275844795
49.4287960138172 3.29787247425942 0.418830223061378
49.4490196295083 3.45744694882036 0.428843514653201
49.4692432451993 3.72340440642192 0.445031947067723
49.4894668608904 3.19148949121879 0.412019521636212
49.5096904765815 3.40425545730004 0.425531932162505
49.5299140922725 3.08510650817816 0.405094330581189
49.5501377079636 2.50000010145472 0.364662493543428
49.5703613236547 2.87234054209691 0.390876038647036
49.5905849393457 3.40425545730004 0.425531932162505
49.6108085550368 2.97872352513754 0.398048674321006
49.6310321707278 3.2446809827391 0.415438829407517
49.6512557864189 3.08510650817816 0.405094330581189
49.67147940211 2.8191490505766 0.387239903442613
49.691703017801 4.46808528770631 0.487508072438874
49.7119266334921 3.51063844034067 0.432129719910892
49.7321502491832 3.08510650817816 0.405094330581189
49.7523738648742 3.35106396577973 0.422194375282049
49.7725974805653 2.8191490505766 0.387239903442613
49.7928210962564 3.03191501665785 0.401586954343472
49.8130447119474 3.19148949121879 0.412019521636212
49.8332683276385 2.8191490505766 0.387239903442613
49.8534919433296 3.93617037250317 0.457570511496874
49.8737155590206 3.56382993186098 0.435391122555825
49.8939391747117 3.19148949121879 0.412019521636212
49.9141627904028 3.29787247425942 0.418830223061378
49.9343864060938 2.76595755905628 0.383569300189794
49.9546100217849 3.35106396577973 0.422194375282049
49.974833637476 3.72340440642192 0.445031947067723
49.995057253167 3.2446809827391 0.415438829407517
50.0152808688581 3.51063844034067 0.432129719910892
50.0355044845492 3.40425545730004 0.425531932162505
50.0557281002402 2.55319159297503 0.368521463374206
50.0759517159313 2.50000010145472 0.364662493543428
50.0961753316224 1.91489369473127 0.319148949121879
50.1163989473134 3.67021291490161 0.441841712766838
50.1366225630045 3.56382993186098 0.435391122555825
50.1568461786956 3.77659589794223 0.448199474208799
50.1770697943866 3.19148949121879 0.412019521636212
50.1972934100777 2.87234054209691 0.390876038647036
50.2175170257688 3.93617037250317 0.457570511496874
50.2377406414598 3.13829799969848 0.408571598914043
50.2579642571509 3.6170214233813 0.438628275844795
50.278187872842 3.51063844034067 0.432129719910892
50.298411488533 3.40425545730004 0.425531932162505
50.3186351042241 2.55319159297503 0.368521463374206
50.3388587199152 2.76595755905628 0.383569300189794
50.3590823356062 3.67021291490161 0.441841712766838
50.3793059512973 3.19148949121879 0.412019521636212
50.3995295669883 3.13829799969848 0.408571598914043
50.4197531826794 3.6170214233813 0.438628275844795
50.4399767983705 3.77659589794223 0.448199474208799
50.4602004140615 3.40425545730004 0.425531932162505
50.4804240297526 3.72340440642192 0.445031947067723
50.5006476454437 2.97872352513754 0.398048674321006
50.5208712611347 3.51063844034067 0.432129719910892
50.5410948768258 3.2446809827391 0.415438829407517
50.5613184925169 2.97872352513754 0.398048674321006
50.5815421082079 2.8191490505766 0.387239903442613
50.601765723899 3.35106396577973 0.422194375282049
50.6219893395901 2.92553203361722 0.394478658939308
50.6422129552811 3.88297888098286 0.454468302768581
50.6624365709722 2.71276606753597 0.37986322969976
50.6826601866633 3.35106396577973 0.422194375282049
50.7028838023543 3.2446809827391 0.415438829407517
50.7231074180454 2.71276606753597 0.37986322969976
50.7433310337365 3.51063844034067 0.432129719910892
50.7635546494275 3.45744694882036 0.428843514653201
50.7837782651186 3.56382993186098 0.435391122555825
50.8040018808097 3.13829799969848 0.408571598914043
50.8242254965007 3.40425545730004 0.425531932162505
50.8444491121918 3.19148949121879 0.412019521636212
50.8646727278829 2.76595755905628 0.383569300189794
50.8848963435739 3.08510650817816 0.405094330581189
50.905119959265 2.97872352513754 0.398048674321006
50.9253435749561 3.51063844034067 0.432129719910892
50.9455671906471 3.51063844034067 0.432129719910892
50.9657908063382 2.28723413537347 0.348799935660385
50.9860144220293 3.03191501665785 0.401586954343472
51.0062380377203 2.44680860993441 0.360762247785373
51.0264616534114 4.0425533555438 0.463712672386492
51.0466852691025 3.13829799969848 0.408571598914043
51.0669088847935 2.8191490505766 0.387239903442613
51.0871325004846 3.19148949121879 0.412019521636212
51.1073561161757 3.35106396577973 0.422194375282049
51.1275797318667 2.71276606753597 0.37986322969976
51.1478033475578 3.40425545730004 0.425531932162505
51.1680269632488 2.97872352513754 0.398048674321006
51.1882505789399 2.71276606753597 0.37986322969976
51.208474194631 2.71276606753597 0.37986322969976
51.228697810322 3.6170214233813 0.438628275844795
51.2489214260131 2.87234054209691 0.390876038647036
51.2691450417042 3.35106396577973 0.422194375282049
51.2893686573952 3.2446809827391 0.415438829407517
51.3095922730863 3.03191501665785 0.401586954343472
51.3298158887774 3.13829799969848 0.408571598914043
51.3500395044684 3.35106396577973 0.422194375282049
51.3702631201595 2.8191490505766 0.387239903442613
51.3904867358506 3.19148949121879 0.412019521636212
51.4107103515416 3.19148949121879 0.412019521636212
51.4309339672327 2.07446816929221 0.332180758076181
51.4511575829238 3.03191501665785 0.401586954343472
51.4713811986148 3.13829799969848 0.408571598914043
51.4916048143059 3.45744694882036 0.428843514653201
51.511828429997 2.60638308449535 0.372340440642192
51.532052045688 3.93617037250317 0.457570511496874
51.5522756613791 2.60638308449535 0.372340440642192
51.5724992770702 3.08510650817816 0.405094330581189
51.5927228927612 2.97872352513754 0.398048674321006
51.6129465084523 3.40425545730004 0.425531932162505
51.6331701241434 3.35106396577973 0.422194375282049
51.6533937398344 2.71276606753597 0.37986322969976
51.6736173555255 2.60638308449535 0.372340440642192
51.6938409712166 2.65957457601566 0.376120643554402
51.7140645869076 3.08510650817816 0.405094330581189
51.7342882025987 2.55319159297503 0.368521463374206
51.7545118182898 2.97872352513754 0.398048674321006
51.7747354339808 2.39361711841409 0.356819372592072
51.7949590496719 3.56382993186098 0.435391122555825
51.815182665363 3.08510650817816 0.405094330581189
51.835406281054 3.2446809827391 0.415438829407517
51.8556298967451 3.03191501665785 0.401586954343472
51.8758535124362 2.71276606753597 0.37986322969976
51.8960771281272 2.97872352513754 0.398048674321006
51.9163007438183 2.76595755905628 0.383569300189794
51.9365243595093 3.19148949121879 0.412019521636212
51.9567479752004 2.65957457601566 0.376120643554402
51.9769715908915 3.77659589794223 0.448199474208799
51.9971952065825 3.82978738946255 0.451344772265282
52.0174188222736 2.71276606753597 0.37986322969976
52.0376424379647 3.35106396577973 0.422194375282049
52.0578660536557 3.03191501665785 0.401586954343472
52.0780896693468 3.29787247425942 0.418830223061378
52.0983132850379 2.92553203361722 0.394478658939308
52.1185369007289 2.87234054209691 0.390876038647036
52.13876051642 2.87234054209691 0.390876038647036
52.1589841321111 2.87234054209691 0.390876038647036
52.1792077478021 2.92553203361722 0.394478658939308
52.1994313634932 3.35106396577973 0.422194375282049
52.2196549791843 3.40425545730004 0.425531932162505
52.2398785948753 3.13829799969848 0.408571598914043
52.2601022105664 2.8191490505766 0.387239903442613
52.2803258262575 2.71276606753597 0.37986322969976
52.3005494419485 2.55319159297503 0.368521463374206
52.3207730576396 3.35106396577973 0.422194375282049
52.3409966733307 3.40425545730004 0.425531932162505
52.3612202890217 3.51063844034067 0.432129719910892
52.3814439047128 3.45744694882036 0.428843514653201
52.4016675204039 2.8191490505766 0.387239903442613
52.4218911360949 3.19148949121879 0.412019521636212
52.442114751786 2.71276606753597 0.37986322969976
52.4623383674771 3.03191501665785 0.401586954343472
52.4825619831681 2.97872352513754 0.398048674321006
52.5027855988592 2.97872352513754 0.398048674321006
52.5230092145503 3.03191501665785 0.401586954343472
52.5432328302413 3.72340440642192 0.445031947067723
52.5634564459324 3.40425545730004 0.425531932162505
52.5836800616235 3.29787247425942 0.418830223061378
52.6039036773145 2.92553203361722 0.394478658939308
52.6241272930056 2.97872352513754 0.398048674321006
52.6443509086967 3.03191501665785 0.401586954343472
52.6645745243877 3.08510650817816 0.405094330581189
52.6847981400788 3.29787247425942 0.418830223061378
52.7050217557698 3.19148949121879 0.412019521636212
52.7252453714609 2.60638308449535 0.372340440642192
52.745468987152 3.29787247425942 0.418830223061378
52.765692602843 2.55319159297503 0.368521463374206
52.7859162185341 2.23404264385315 0.34472026390471
52.8061398342252 3.03191501665785 0.401586954343472
52.8263634499162 2.44680860993441 0.360762247785373
52.8465870656073 2.76595755905628 0.383569300189794
52.8668106812984 2.92553203361722 0.394478658939308
52.8870342969894 3.13829799969848 0.408571598914043
52.9072579126805 2.87234054209691 0.390876038647036
52.9274815283716 2.97872352513754 0.398048674321006
52.9477051440626 2.87234054209691 0.390876038647036
52.9679287597537 3.77659589794223 0.448199474208799
52.9881523754448 3.82978738946255 0.451344772265282
53.0083759911358 2.92553203361722 0.394478658939308
53.0285996068269 2.07446816929221 0.332180758076181
53.048823222518 3.6170214233813 0.438628275844795
53.069046838209 3.40425545730004 0.425531932162505
53.0892704539001 3.56382993186098 0.435391122555825
53.1094940695912 3.2446809827391 0.415438829407517
53.1297176852822 2.60638308449535 0.372340440642192
53.1499413009733 3.40425545730004 0.425531932162505
53.1701649166644 2.23404264385315 0.34472026390471
53.1903885323554 3.2446809827391 0.415438829407517
53.2106121480465 2.60638308449535 0.372340440642192
53.2308357637376 3.51063844034067 0.432129719910892
53.2510593794286 2.60638308449535 0.372340440642192
53.2712829951197 3.19148949121879 0.412019521636212
53.2915066108108 3.93617037250317 0.457570511496874
53.3117302265018 3.03191501665785 0.401586954343472
53.3319538421929 3.03191501665785 0.401586954343472
53.352177457884 3.72340440642192 0.445031947067723
53.372401073575 3.51063844034067 0.432129719910892
53.3926246892661 2.92553203361722 0.394478658939308
53.4128483049572 2.65957457601566 0.376120643554402
53.4330719206482 3.29787247425942 0.418830223061378
53.4532955363393 2.55319159297503 0.368521463374206
53.4735191520303 2.97872352513754 0.398048674321006
53.4937427677214 2.97872352513754 0.398048674321006
53.5139663834125 3.08510650817816 0.405094330581189
53.5341899991035 3.19148949121879 0.412019521636212
53.5544136147946 3.2446809827391 0.415438829407517
53.5746372304857 3.40425545730004 0.425531932162505
53.5948608461767 3.51063844034067 0.432129719910892
53.6150844618678 3.19148949121879 0.412019521636212
53.6353080775589 3.03191501665785 0.401586954343472
53.6555316932499 3.35106396577973 0.422194375282049
53.675755308941 2.97872352513754 0.398048674321006
53.6959789246321 3.2446809827391 0.415438829407517
53.7162025403231 3.51063844034067 0.432129719910892
53.7364261560142 4.36170230466568 0.481669441788406
53.7566497717053 3.98936186402349 0.460651829217758
53.7768733873963 3.2446809827391 0.415438829407517
53.7970970030874 3.51063844034067 0.432129719910892
53.8173206187785 2.97872352513754 0.398048674321006
53.8375442344695 3.88297888098286 0.454468302768581
53.8577678501606 3.98936186402349 0.460651829217758
53.8779914658517 3.19148949121879 0.412019521636212
53.8982150815427 2.71276606753597 0.37986322969976
53.9184386972338 3.35106396577973 0.422194375282049
53.9386623129249 3.45744694882036 0.428843514653201
53.9588859286159 3.35106396577973 0.422194375282049
53.979109544307 3.51063844034067 0.432129719910892
53.9993331599981 3.29787247425942 0.418830223061378
54.0195567756891 3.13829799969848 0.408571598914043
54.0397803913802 3.08510650817816 0.405094330581189
54.0600040070713 3.67021291490161 0.441841712766838
54.0802276227623 3.98936186402349 0.460651829217758
54.1004512384534 3.35106396577973 0.422194375282049
54.1206748541445 3.13829799969848 0.408571598914043
54.1408984698355 3.13829799969848 0.408571598914043
54.1611220855266 3.08510650817816 0.405094330581189
54.1813457012177 3.03191501665785 0.401586954343472
54.2015693169087 3.2446809827391 0.415438829407517
54.2217929325998 2.8191490505766 0.387239903442613
54.2420165482908 2.28723413537347 0.348799935660385
54.2622401639819 3.6170214233813 0.438628275844795
54.282463779673 2.50000010145472 0.364662493543428
54.302687395364 3.08510650817816 0.405094330581189
54.3229110110551 2.87234054209691 0.390876038647036
54.3431346267462 2.97872352513754 0.398048674321006
54.3633582424372 2.97872352513754 0.398048674321006
54.3835818581283 3.40425545730004 0.425531932162505
54.4038054738194 3.03191501665785 0.401586954343472
54.4240290895104 2.87234054209691 0.390876038647036
54.4442527052015 2.28723413537347 0.348799935660385
54.4644763208926 2.55319159297503 0.368521463374206
54.4846999365836 2.92553203361722 0.394478658939308
54.5049235522747 3.35106396577973 0.422194375282049
54.5251471679658 3.08510650817816 0.405094330581189
54.5453707836568 2.65957457601566 0.376120643554402
54.5655943993479 3.35106396577973 0.422194375282049
54.585818015039 3.13829799969848 0.408571598914043
54.60604163073 3.03191501665785 0.401586954343472
54.6262652464211 3.35106396577973 0.422194375282049
54.6464888621122 2.8191490505766 0.387239903442613
54.6667124778032 3.98936186402349 0.460651829217758
54.6869360934943 2.71276606753597 0.37986322969976
54.7071597091854 2.92553203361722 0.394478658939308
54.7273833248764 3.19148949121879 0.412019521636212
54.7476069405675 2.97872352513754 0.398048674321006
54.7678305562586 3.35106396577973 0.422194375282049
54.7880541719496 3.08510650817816 0.405094330581189
54.8082777876407 3.77659589794223 0.448199474208799
54.8285014033318 3.98936186402349 0.460651829217758
54.8487250190228 2.92553203361722 0.394478658939308
54.8689486347139 2.87234054209691 0.390876038647036
54.889172250405 3.29787247425942 0.418830223061378
54.909395866096 3.03191501665785 0.401586954343472
54.9296194817871 2.87234054209691 0.390876038647036
54.9498430974782 3.03191501665785 0.401586954343472
54.9700667131692 2.39361711841409 0.356819372592072
54.9902903288603 3.51063844034067 0.432129719910892
55.0105139445513 3.19148949121879 0.412019521636212
55.0307375602424 2.97872352513754 0.398048674321006
55.0509611759335 2.92553203361722 0.394478658939308
55.0711847916245 3.29787247425942 0.418830223061378
55.0914084073156 2.50000010145472 0.364662493543428
55.1116320230067 2.71276606753597 0.37986322969976
55.1318556386977 3.2446809827391 0.415438829407517
55.1520792543888 2.65957457601566 0.376120643554402
55.1723028700799 2.71276606753597 0.37986322969976
55.1925264857709 3.13829799969848 0.408571598914043
55.212750101462 3.03191501665785 0.401586954343472
55.2329737171531 3.03191501665785 0.401586954343472
55.2531973328441 2.23404264385315 0.34472026390471
55.2734209485352 2.97872352513754 0.398048674321006
55.2936445642263 2.76595755905628 0.383569300189794
55.3138681799173 3.13829799969848 0.408571598914043
55.3340917956084 3.19148949121879 0.412019521636212
55.3543154112995 3.03191501665785 0.401586954343472
55.3745390269905 3.35106396577973 0.422194375282049
55.3947626426816 3.40425545730004 0.425531932162505
55.4149862583727 2.87234054209691 0.390876038647036
55.4352098740637 3.35106396577973 0.422194375282049
55.4554334897548 2.8191490505766 0.387239903442613
55.4756571054459 3.35106396577973 0.422194375282049
55.4958807211369 2.76595755905628 0.383569300189794
55.516104336828 3.77659589794223 0.448199474208799
55.5363279525191 2.97872352513754 0.398048674321006
55.5565515682101 2.34042562689378 0.352832438824499
55.5767751839012 2.28723413537347 0.348799935660385
55.5969987995923 2.34042562689378 0.352832438824499
55.6172224152833 2.87234054209691 0.390876038647036
55.6374460309744 3.6170214233813 0.438628275844795
55.6576696466655 3.13829799969848 0.408571598914043
55.6778932623565 2.8191490505766 0.387239903442613
55.6981168780476 3.08510650817816 0.405094330581189
55.7183404937387 2.71276606753597 0.37986322969976
55.7385641094297 3.40425545730004 0.425531932162505
55.7587877251208 3.08510650817816 0.405094330581189
55.7790113408118 3.35106396577973 0.422194375282049
55.7992349565029 2.92553203361722 0.394478658939308
55.819458572194 3.13829799969848 0.408571598914043
55.839682187885 3.77659589794223 0.448199474208799
55.8599058035761 3.82978738946255 0.451344772265282
55.8801294192672 3.6170214233813 0.438628275844795
55.9003530349582 3.29787247425942 0.418830223061378
55.9205766506493 2.8191490505766 0.387239903442613
55.9408002663404 2.55319159297503 0.368521463374206
55.9610238820314 2.8191490505766 0.387239903442613
55.9812474977225 2.39361711841409 0.356819372592072
56.0014711134136 2.65957457601566 0.376120643554402
56.0216947291046 2.8191490505766 0.387239903442613
56.0419183447957 2.71276606753597 0.37986322969976
56.0621419604868 2.76595755905628 0.383569300189794
56.0823655761778 3.2446809827391 0.415438829407517
56.1025891918689 2.71276606753597 0.37986322969976
56.12281280756 2.71276606753597 0.37986322969976
56.143036423251 3.29787247425942 0.418830223061378
56.1632600389421 3.45744694882036 0.428843514653201
56.1834836546332 3.19148949121879 0.412019521636212
56.2037072703242 3.2446809827391 0.415438829407517
56.2239308860153 2.97872352513754 0.398048674321006
56.2441545017064 2.71276606753597 0.37986322969976
56.2643781173974 2.92553203361722 0.394478658939308
56.2846017330885 2.65957457601566 0.376120643554402
56.3048253487796 3.19148949121879 0.412019521636212
56.3250489644706 2.71276606753597 0.37986322969976
56.3452725801617 3.2446809827391 0.415438829407517
56.3654961958528 3.72340440642192 0.445031947067723
56.3857198115438 2.44680860993441 0.360762247785373
56.4059434272349 2.65957457601566 0.376120643554402
56.426167042926 3.35106396577973 0.422194375282049
56.446390658617 3.13829799969848 0.408571598914043
56.4666142743081 2.65957457601566 0.376120643554402
56.4868378899992 3.82978738946255 0.451344772265282
56.5070615056902 3.35106396577973 0.422194375282049
56.5272851213813 3.77659589794223 0.448199474208799
56.5475087370723 3.93617037250317 0.457570511496874
56.5677323527634 2.71276606753597 0.37986322969976
56.5879559684545 3.08510650817816 0.405094330581189
56.6081795841455 2.97872352513754 0.398048674321006
56.6284031998366 2.92553203361722 0.394478658939308
56.6486268155277 2.92553203361722 0.394478658939308
56.6688504312187 2.71276606753597 0.37986322969976
56.6890740469098 2.97872352513754 0.398048674321006
56.7092976626009 3.19148949121879 0.412019521636212
56.7295212782919 3.19148949121879 0.412019521636212
56.749744893983 3.08510650817816 0.405094330581189
56.7699685096741 3.51063844034067 0.432129719910892
56.7901921253651 3.29787247425942 0.418830223061378
56.8104157410562 3.13829799969848 0.408571598914043
56.8306393567473 3.56382993186098 0.435391122555825
56.8508629724383 3.6170214233813 0.438628275844795
56.8710865881294 3.35106396577973 0.422194375282049
56.8913102038205 3.45744694882036 0.428843514653201
56.9115338195115 3.19148949121879 0.412019521636212
56.9317574352026 3.77659589794223 0.448199474208799
56.9519810508937 3.29787247425942 0.418830223061378
56.9722046665847 2.92553203361722 0.394478658939308
56.9924282822758 3.45744694882036 0.428843514653201
57.0126518979669 3.67021291490161 0.441841712766838
57.0328755136579 2.87234054209691 0.390876038647036
57.053099129349 3.93617037250317 0.457570511496874
57.0733227450401 3.67021291490161 0.441841712766838
57.0935463607311 2.87234054209691 0.390876038647036
57.1137699764222 3.35106396577973 0.422194375282049
57.1339935921133 3.29787247425942 0.418830223061378
57.1542172078043 3.98936186402349 0.460651829217758
57.1744408234954 2.97872352513754 0.398048674321006
57.1946644391865 3.19148949121879 0.412019521636212
57.2148880548775 4.20212783010474 0.472776317979537
57.2351116705686 4.36170230466568 0.481669441788406
57.2553352862597 3.77659589794223 0.448199474208799
57.2755589019507 4.0425533555438 0.463712672386492
57.2957825176418 3.40425545730004 0.425531932162505
57.3160061333328 4.0425533555438 0.463712672386492
57.3362297490239 3.67021291490161 0.441841712766838
57.356453364715 3.67021291490161 0.441841712766838
57.376676980406 3.77659589794223 0.448199474208799
57.3969005960971 3.08510650817816 0.405094330581189
57.4171242117882 3.93617037250317 0.457570511496874
57.4373478274792 3.67021291490161 0.441841712766838
57.4575714431703 3.72340440642192 0.445031947067723
57.4777950588614 3.03191501665785 0.401586954343472
57.4980186745524 3.6170214233813 0.438628275844795
57.5182422902435 4.14893633858443 0.469774533230711
57.5384659059346 4.14893633858443 0.469774533230711
57.5586895216256 4.20212783010474 0.472776317979537
57.5789131373167 3.51063844034067 0.432129719910892
57.5991367530078 3.2446809827391 0.415438829407517
57.6193603686988 3.45744694882036 0.428843514653201
57.6395839843899 2.8191490505766 0.387239903442613
57.659807600081 4.0425533555438 0.463712672386492
57.680031215772 3.35106396577973 0.422194375282049
57.7002548314631 3.40425545730004 0.425531932162505
57.7204784471542 3.45744694882036 0.428843514653201
57.7407020628452 3.19148949121879 0.412019521636212
57.7609256785363 3.35106396577973 0.422194375282049
57.7811492942274 3.03191501665785 0.401586954343472
57.8013729099184 3.6170214233813 0.438628275844795
57.8215965256095 2.76595755905628 0.383569300189794
57.8418201413006 3.51063844034067 0.432129719910892
57.8620437569916 3.67021291490161 0.441841712766838
57.8822673726827 3.35106396577973 0.422194375282049
57.9024909883738 2.71276606753597 0.37986322969976
57.9227146040648 2.76595755905628 0.383569300189794
57.9429382197559 3.03191501665785 0.401586954343472
57.963161835447 3.19148949121879 0.412019521636212
57.983385451138 2.12765966081253 0.336412530691444
58.0036090668291 3.35106396577973 0.422194375282049
58.0238326825202 3.03191501665785 0.401586954343472
58.0440562982112 2.44680860993441 0.360762247785373
58.0642799139023 3.13829799969848 0.408571598914043
58.0845035295933 3.13829799969848 0.408571598914043
58.1047271452844 3.2446809827391 0.415438829407517
58.1249507609755 2.92553203361722 0.394478658939308
58.1451743766665 3.67021291490161 0.441841712766838
58.1653979923576 3.51063844034067 0.432129719910892
58.1856216080487 2.65957457601566 0.376120643554402
58.2058452237397 2.23404264385315 0.34472026390471
58.2260688394308 3.03191501665785 0.401586954343472
58.2462924551219 3.45744694882036 0.428843514653201
58.2665160708129 3.2446809827391 0.415438829407517
58.286739686504 3.51063844034067 0.432129719910892
58.3069633021951 3.45744694882036 0.428843514653201
58.3271869178861 2.92553203361722 0.394478658939308
58.3474105335772 2.8191490505766 0.387239903442613
58.3676341492683 2.8191490505766 0.387239903442613
58.3878577649593 2.92553203361722 0.394478658939308
58.4080813806504 2.71276606753597 0.37986322969976
58.4283049963415 2.65957457601566 0.376120643554402
58.4485286120325 2.65957457601566 0.376120643554402
58.4687522277236 2.76595755905628 0.383569300189794
58.4889758434147 3.35106396577973 0.422194375282049
58.5091994591057 2.76595755905628 0.383569300189794
58.5294230747968 3.29787247425942 0.418830223061378
58.5496466904879 2.55319159297503 0.368521463374206
58.5698703061789 2.92553203361722 0.394478658939308
58.59009392187 2.65957457601566 0.376120643554402
58.6103175375611 3.13829799969848 0.408571598914043
58.6305411532521 3.13829799969848 0.408571598914043
58.6507647689432 2.87234054209691 0.390876038647036
58.6709883846343 2.60638308449535 0.372340440642192
58.6912120003253 2.34042562689378 0.352832438824499
58.7114356160164 3.29787247425942 0.418830223061378
58.7316592317075 2.44680860993441 0.360762247785373
58.7518828473985 2.76595755905628 0.383569300189794
58.7721064630896 2.71276606753597 0.37986322969976
58.7923300787807 2.65957457601566 0.376120643554402
58.8125536944717 2.44680860993441 0.360762247785373
58.8327773101628 3.56382993186098 0.435391122555825
58.8530009258538 2.87234054209691 0.390876038647036
58.8732245415449 2.87234054209691 0.390876038647036
58.893448157236 2.92553203361722 0.394478658939308
58.913671772927 2.8191490505766 0.387239903442613
58.9338953886181 2.65957457601566 0.376120643554402
58.9541190043092 2.8191490505766 0.387239903442613
58.9743426200002 2.23404264385315 0.34472026390471
58.9945662356913 2.65957457601566 0.376120643554402
59.0147898513824 2.71276606753597 0.37986322969976
59.0350134670734 2.71276606753597 0.37986322969976
59.0552370827645 3.03191501665785 0.401586954343472
59.0754606984556 3.08510650817816 0.405094330581189
59.0956843141466 2.87234054209691 0.390876038647036
59.1159079298377 3.29787247425942 0.418830223061378
59.1361315455288 3.08510650817816 0.405094330581189
59.1563551612198 2.8191490505766 0.387239903442613
59.1765787769109 3.13829799969848 0.408571598914043
59.196802392602 2.65957457601566 0.376120643554402
59.217026008293 1.86170220321096 0.314685107616239
59.2372496239841 2.76595755905628 0.383569300189794
59.2574732396752 3.08510650817816 0.405094330581189
59.2776968553662 2.71276606753597 0.37986322969976
59.2979204710573 3.45744694882036 0.428843514653201
59.3181440867484 3.2446809827391 0.415438829407517
59.3383677024394 3.19148949121879 0.412019521636212
59.3585913181305 3.13829799969848 0.408571598914043
59.3788149338216 3.29787247425942 0.418830223061378
59.3990385495126 2.23404264385315 0.34472026390471
59.4192621652037 2.97872352513754 0.398048674321006
59.4394857808948 3.51063844034067 0.432129719910892
59.4597093965858 2.8191490505766 0.387239903442613
59.4799330122769 2.28723413537347 0.348799935660385
59.500156627968 3.35106396577973 0.422194375282049
59.520380243659 2.50000010145472 0.364662493543428
59.5406038593501 3.03191501665785 0.401586954343472
59.5608274750412 2.87234054209691 0.390876038647036
59.5810510907322 2.71276606753597 0.37986322969976
59.6012747064233 3.72340440642192 0.445031947067723
59.6214983221143 3.08510650817816 0.405094330581189
59.6417219378054 2.76595755905628 0.383569300189794
59.6619455534965 3.67021291490161 0.441841712766838
59.6821691691875 3.29787247425942 0.418830223061378
59.7023927848786 3.03191501665785 0.401586954343472
59.7226164005697 2.76595755905628 0.383569300189794
59.7428400162607 3.13829799969848 0.408571598914043
59.7630636319518 2.65957457601566 0.376120643554402
59.7832872476429 2.39361711841409 0.356819372592072
59.8035108633339 3.03191501665785 0.401586954343472
59.823734479025 3.13829799969848 0.408571598914043
59.8439580947161 2.71276606753597 0.37986322969976
59.8641817104071 2.92553203361722 0.394478658939308
59.8844053260982 2.8191490505766 0.387239903442613
59.9046289417893 2.39361711841409 0.356819372592072
59.9248525574803 2.55319159297503 0.368521463374206
59.9450761731714 2.87234054209691 0.390876038647036
59.9652997888625 3.2446809827391 0.415438829407517
59.9855234045535 2.18085115233284 0.340591728578921
60.0057470202446 2.76595755905628 0.383569300189794
60.0259706359357 3.45744694882036 0.428843514653201
60.0461942516267 3.35106396577973 0.422194375282049
60.0664178673178 2.65957457601566 0.376120643554402
60.0866414830089 3.19148949121879 0.412019521636212
60.1068650986999 3.29787247425942 0.418830223061378
60.127088714391 3.19148949121879 0.412019521636212
60.1473123300821 2.34042562689378 0.352832438824499
60.1675359457731 3.29787247425942 0.418830223061378
60.1877595614642 2.76595755905628 0.383569300189794
60.2079831771553 2.87234054209691 0.390876038647036
60.2282067928463 3.2446809827391 0.415438829407517
60.2484304085374 3.19148949121879 0.412019521636212
60.2686540242285 2.23404264385315 0.34472026390471
60.2888776399195 3.2446809827391 0.415438829407517
60.3091012556106 3.29787247425942 0.418830223061378
60.3293248713017 2.55319159297503 0.368521463374206
60.3495484869927 2.92553203361722 0.394478658939308
60.3697721026838 2.97872352513754 0.398048674321006
60.3899957183748 2.18085115233284 0.340591728578921
60.4102193340659 2.34042562689378 0.352832438824499
60.430442949757 3.2446809827391 0.415438829407517
60.450666565448 2.8191490505766 0.387239903442613
60.4708901811391 2.18085115233284 0.340591728578921
60.4911137968302 2.65957457601566 0.376120643554402
60.5113374125212 3.45744694882036 0.428843514653201
60.5315610282123 3.56382993186098 0.435391122555825
60.5517846439034 3.13829799969848 0.408571598914043
60.5720082595944 1.91489369473127 0.319148949121879
60.5922318752855 2.76595755905628 0.383569300189794
60.6124554909766 3.08510650817816 0.405094330581189
60.6326791066676 3.67021291490161 0.441841712766838
60.6529027223587 3.13829799969848 0.408571598914043
60.6731263380498 2.39361711841409 0.356819372592072
60.6933499537408 2.12765966081253 0.336412530691444
60.7135735694319 2.97872352513754 0.398048674321006
60.733797185123 2.60638308449535 0.372340440642192
60.754020800814 2.55319159297503 0.368521463374206
60.7742444165051 2.39361711841409 0.356819372592072
60.7944680321962 2.8191490505766 0.387239903442613
60.8146916478872 2.50000010145472 0.364662493543428
60.8349152635783 3.2446809827391 0.415438829407517
60.8551388792694 3.03191501665785 0.401586954343472
60.8753624949604 2.44680860993441 0.360762247785373
60.8955861106515 2.87234054209691 0.390876038647036
60.9158097263426 3.35106396577973 0.422194375282049
60.9360333420336 2.97872352513754 0.398048674321006
60.9562569577247 2.71276606753597 0.37986322969976
60.9764805734158 3.29787247425942 0.418830223061378
60.9967041891068 2.8191490505766 0.387239903442613
61.0169278047979 2.60638308449535 0.372340440642192
61.037151420489 2.87234054209691 0.390876038647036
61.05737503618 3.40425545730004 0.425531932162505
61.0775986518711 2.28723413537347 0.348799935660385
61.0978222675622 3.51063844034067 0.432129719910892
61.1180458832532 2.92553203361722 0.394478658939308
61.1382694989443 2.97872352513754 0.398048674321006
61.1584931146353 2.76595755905628 0.383569300189794
61.1787167303264 3.2446809827391 0.415438829407517
61.1989403460175 3.08510650817816 0.405094330581189
61.2191639617085 2.65957457601566 0.376120643554402
61.2393875773996 2.28723413537347 0.348799935660385
61.2596111930907 1.96808518625159 0.323551211550436
61.2798348087817 2.23404264385315 0.34472026390471
61.3000584244728 3.08510650817816 0.405094330581189
61.3202820401639 2.34042562689378 0.352832438824499
61.3405056558549 2.65957457601566 0.376120643554402
61.360729271546 2.60638308449535 0.372340440642192
61.3809528872371 3.35106396577973 0.422194375282049
61.4011765029281 2.44680860993441 0.360762247785373
61.4214001186192 2.87234054209691 0.390876038647036
61.4416237343103 2.65957457601566 0.376120643554402
61.4618473500013 3.19148949121879 0.412019521636212
61.4820709656924 2.23404264385315 0.34472026390471
61.5022945813835 2.97872352513754 0.398048674321006
61.5225181970745 2.23404264385315 0.34472026390471
61.5427418127656 3.08510650817816 0.405094330581189
61.5629654284567 3.13829799969848 0.408571598914043
61.5831890441477 2.87234054209691 0.390876038647036
61.6034126598388 3.2446809827391 0.415438829407517
61.6236362755299 2.07446816929221 0.332180758076181
61.6438598912209 2.71276606753597 0.37986322969976
61.664083506912 2.39361711841409 0.356819372592072
61.6843071226031 3.45744694882036 0.428843514653201
61.7045307382941 2.39361711841409 0.356819372592072
61.7247543539852 2.8191490505766 0.387239903442613
61.7449779696763 2.97872352513754 0.398048674321006
61.7652015853673 3.40425545730004 0.425531932162505
61.7854252010584 2.55319159297503 0.368521463374206
61.8056488167495 2.76595755905628 0.383569300189794
61.8258724324405 3.19148949121879 0.412019521636212
61.8460960481316 3.19148949121879 0.412019521636212
61.8663196638227 2.50000010145472 0.364662493543428
61.8865432795137 2.8191490505766 0.387239903442613
61.9067668952048 2.71276606753597 0.37986322969976
61.9269905108958 2.92553203361722 0.394478658939308
61.9472141265869 2.87234054209691 0.390876038647036
61.967437742278 3.51063844034067 0.432129719910892
61.987661357969 2.18085115233284 0.340591728578921
62.0078849736601 2.92553203361722 0.394478658939308
62.0281085893512 2.60638308449535 0.372340440642192
62.0483322050422 3.2446809827391 0.415438829407517
62.0685558207333 2.76595755905628 0.383569300189794
62.0887794364244 2.8191490505766 0.387239903442613
62.1090030521154 3.08510650817816 0.405094330581189
62.1292266678065 2.92553203361722 0.394478658939308
62.1494502834976 3.03191501665785 0.401586954343472
62.1696738991886 3.29787247425942 0.418830223061378
62.1898975148797 2.97872352513754 0.398048674321006
62.2101211305708 3.19148949121879 0.412019521636212
62.2303447462618 2.28723413537347 0.348799935660385
62.2505683619529 3.13829799969848 0.408571598914043
62.270791977644 3.29787247425942 0.418830223061378
62.291015593335 3.08510650817816 0.405094330581189
62.3112392090261 2.8191490505766 0.387239903442613
62.3314628247172 2.34042562689378 0.352832438824499
62.3516864404082 3.2446809827391 0.415438829407517
62.3719100560993 2.60638308449535 0.372340440642192
62.3921336717904 2.87234054209691 0.390876038647036
62.4123572874814 2.39361711841409 0.356819372592072
62.4325809031725 2.65957457601566 0.376120643554402
62.4528045188636 3.03191501665785 0.401586954343472
62.4730281345546 2.87234054209691 0.390876038647036
62.4932517502457 3.82978738946255 0.451344772265282
62.5134753659368 3.51063844034067 0.432129719910892
62.5336989816278 3.29787247425942 0.418830223061378
62.5539225973189 3.13829799969848 0.408571598914043
62.57414621301 3.51063844034067 0.432129719910892
62.594369828701 2.44680860993441 0.360762247785373
62.6145934443921 2.60638308449535 0.372340440642192
62.6348170600832 3.56382993186098 0.435391122555825
62.6550406757742 3.19148949121879 0.412019521636212
62.6752642914653 3.77659589794223 0.448199474208799
62.6954879071563 3.40425545730004 0.425531932162505
62.7157115228474 3.35106396577973 0.422194375282049
62.7359351385385 3.72340440642192 0.445031947067723
62.7561587542295 3.2446809827391 0.415438829407517
62.7763823699206 3.35106396577973 0.422194375282049
62.7966059856117 3.45744694882036 0.428843514653201
62.8168296013027 3.13829799969848 0.408571598914043
62.8370532169938 4.36170230466568 0.481669441788406
62.8572768326849 2.87234054209691 0.390876038647036
62.8775004483759 3.2446809827391 0.415438829407517
62.897724064067 3.93617037250317 0.457570511496874
62.9179476797581 3.56382993186098 0.435391122555825
62.9381712954491 3.35106396577973 0.422194375282049
62.9583949111402 2.92553203361722 0.394478658939308
62.9786185268313 3.40425545730004 0.425531932162505
62.9988421425223 2.87234054209691 0.390876038647036
63.0190657582134 4.41489379618599 0.48459755047143
63.0392893739045 3.77659589794223 0.448199474208799
63.0595129895955 2.76595755905628 0.383569300189794
63.0797366052866 3.19148949121879 0.412019521636212
63.0999602209777 3.77659589794223 0.448199474208799
63.1201838366687 2.76595755905628 0.383569300189794
63.1404074523598 2.97872352513754 0.398048674321006
63.1606310680509 3.40425545730004 0.425531932162505
63.1808546837419 3.29787247425942 0.418830223061378
63.201078299433 3.40425545730004 0.425531932162505
63.2213019151241 3.29787247425942 0.418830223061378
63.2415255308151 3.56382993186098 0.435391122555825
63.2617491465062 3.13829799969848 0.408571598914043
63.2819727621973 3.35106396577973 0.422194375282049
63.3021963778883 3.77659589794223 0.448199474208799
63.3224199935794 3.56382993186098 0.435391122555825
63.3426436092705 3.45744694882036 0.428843514653201
63.3628672249615 3.13829799969848 0.408571598914043
63.3830908406526 3.19148949121879 0.412019521636212
63.4033144563437 3.29787247425942 0.418830223061378
63.4235380720347 3.45744694882036 0.428843514653201
63.4437616877258 3.29787247425942 0.418830223061378
63.4639853034168 3.45744694882036 0.428843514653201
63.4842089191079 3.51063844034067 0.432129719910892
63.504432534799 3.67021291490161 0.441841712766838
63.52465615049 3.51063844034067 0.432129719910892
63.5448797661811 2.65957457601566 0.376120643554402
63.5651033818722 2.92553203361722 0.394478658939308
63.5853269975632 3.08510650817816 0.405094330581189
63.6055506132543 2.07446816929221 0.332180758076181
63.6257742289454 2.8191490505766 0.387239903442613
63.6459978446364 2.65957457601566 0.376120643554402
63.6662214603275 2.71276606753597 0.37986322969976
63.6864450760186 2.87234054209691 0.390876038647036
63.7066686917096 3.08510650817816 0.405094330581189
63.7268923074007 2.76595755905628 0.383569300189794
63.7471159230918 2.87234054209691 0.390876038647036
63.7673395387828 2.28723413537347 0.348799935660385
63.7875631544739 3.13829799969848 0.408571598914043
63.807786770165 2.23404264385315 0.34472026390471
63.828010385856 2.71276606753597 0.37986322969976
63.8482340015471 2.87234054209691 0.390876038647036
63.8684576172382 2.55319159297503 0.368521463374206
63.8886812329292 2.71276606753597 0.37986322969976
63.9089048486203 1.96808518625159 0.323551211550436
63.9291284643114 2.23404264385315 0.34472026390471
63.9493520800024 3.2446809827391 0.415438829407517
63.9695756956935 2.55319159297503 0.368521463374206
63.9897993113846 2.71276606753597 0.37986322969976
64.0100229270756 3.2446809827391 0.415438829407517
64.0302465427667 2.60638308449535 0.372340440642192
64.0504701584578 2.44680860993441 0.360762247785373
64.0706937741488 2.34042562689378 0.352832438824499
64.0909173898399 2.07446816929221 0.332180758076181
64.111141005531 2.44680860993441 0.360762247785373
64.131364621222 2.71276606753597 0.37986322969976
64.1515882369131 2.8191490505766 0.387239903442613
64.1718118526042 2.39361711841409 0.356819372592072
64.1920354682952 2.65957457601566 0.376120643554402
64.2122590839863 2.8191490505766 0.387239903442613
64.2324826996773 2.71276606753597 0.37986322969976
64.2527063153684 3.03191501665785 0.401586954343472
64.2729299310595 2.28723413537347 0.348799935660385
64.2931535467505 2.87234054209691 0.390876038647036
64.3133771624416 2.28723413537347 0.348799935660385
64.3336007781327 2.39361711841409 0.356819372592072
64.3538243938237 2.44680860993441 0.360762247785373
64.3740480095148 2.65957457601566 0.376120643554402
64.3942716252059 2.97872352513754 0.398048674321006
64.4144952408969 2.12765966081253 0.336412530691444
64.434718856588 2.8191490505766 0.387239903442613
64.4549424722791 2.50000010145472 0.364662493543428
64.4751660879701 3.19148949121879 0.412019521636212
64.4953897036612 3.08510650817816 0.405094330581189
64.5156133193523 2.12765966081253 0.336412530691444
64.5358369350433 2.0212766777719 0.327894375166624
64.5560605507344 2.34042562689378 0.352832438824499
64.5762841664255 2.8191490505766 0.387239903442613
64.5965077821165 2.34042562689378 0.352832438824499
64.6167313978076 2.60638308449535 0.372340440642192
64.6369550134987 2.0212766777719 0.327894375166624
64.6571786291897 2.18085115233284 0.340591728578921
64.6774022448808 2.39361711841409 0.356819372592072
64.6976258605719 2.87234054209691 0.390876038647036
64.7178494762629 2.34042562689378 0.352832438824499
64.738073091954 2.60638308449535 0.372340440642192
64.7582967076451 2.50000010145472 0.364662493543428
64.7785203233361 2.34042562689378 0.352832438824499
64.7987439390272 2.71276606753597 0.37986322969976
64.8189675547183 2.23404264385315 0.34472026390471
64.8391911704093 2.44680860993441 0.360762247785373
64.8594147861004 2.87234054209691 0.390876038647036
64.8796384017915 1.91489369473127 0.319148949121879
64.8998620174825 2.34042562689378 0.352832438824499
64.9200856331736 2.23404264385315 0.34472026390471
64.9403092488647 2.76595755905628 0.383569300189794
64.9605328645557 2.34042562689378 0.352832438824499
64.9807564802468 2.23404264385315 0.34472026390471
65.0009800959378 2.76595755905628 0.383569300189794
65.0212037116289 3.13829799969848 0.408571598914043
65.04142732732 2.55319159297503 0.368521463374206
65.061650943011 2.44680860993441 0.360762247785373
65.0818745587021 2.44680860993441 0.360762247785373
65.1020981743932 2.60638308449535 0.372340440642192
65.1223217900842 2.65957457601566 0.376120643554402
65.1425454057753 2.60638308449535 0.372340440642192
65.1627690214664 2.87234054209691 0.390876038647036
65.1829926371574 2.44680860993441 0.360762247785373
65.2032162528485 2.39361711841409 0.356819372592072
65.2234398685396 2.60638308449535 0.372340440642192
65.2436634842306 1.86170220321096 0.314685107616239
65.2638870999217 2.55319159297503 0.368521463374206
65.2841107156128 2.71276606753597 0.37986322969976
65.3043343313038 1.96808518625159 0.323551211550436
65.3245579469949 3.19148949121879 0.412019521636212
65.344781562686 3.08510650817816 0.405094330581189
65.365005178377 2.44680860993441 0.360762247785373
65.3852287940681 2.60638308449535 0.372340440642192
65.4054524097592 2.87234054209691 0.390876038647036
65.4256760254502 2.8191490505766 0.387239903442613
65.4458996411413 2.18085115233284 0.340591728578921
65.4661232568324 2.65957457601566 0.376120643554402
65.4863468725234 2.23404264385315 0.34472026390471
65.5065704882145 2.12765966081253 0.336412530691444
65.5267941039056 2.28723413537347 0.348799935660385
65.5470177195966 2.39361711841409 0.356819372592072
65.5672413352877 2.23404264385315 0.34472026390471
65.5874649509788 2.55319159297503 0.368521463374206
65.6076885666698 2.34042562689378 0.352832438824499
65.6279121823609 2.0212766777719 0.327894375166624
65.648135798052 2.65957457601566 0.376120643554402
65.668359413743 3.08510650817816 0.405094330581189
65.6885830294341 1.91489369473127 0.319148949121879
65.7088066451252 2.8191490505766 0.387239903442613
65.7290302608162 3.40425545730004 0.425531932162505
65.7492538765073 2.65957457601566 0.376120643554402
65.7694774921983 3.08510650817816 0.405094330581189
65.7897011078894 2.65957457601566 0.376120643554402
65.8099247235805 2.34042562689378 0.352832438824499
65.8301483392715 2.0212766777719 0.327894375166624
65.8503719549626 2.50000010145472 0.364662493543428
65.8705955706537 1.96808518625159 0.323551211550436
65.8908191863447 2.87234054209691 0.390876038647036
65.9110428020358 3.2446809827391 0.415438829407517
65.9312664177269 2.0212766777719 0.327894375166624
65.9514900334179 2.34042562689378 0.352832438824499
65.971713649109 2.0212766777719 0.327894375166624
65.9919372648001 2.8191490505766 0.387239903442613
66.0121608804911 2.28723413537347 0.348799935660385
66.0323844961822 2.39361711841409 0.356819372592072
66.0526081118733 2.44680860993441 0.360762247785373
66.0728317275643 2.23404264385315 0.34472026390471
66.0930553432554 2.39361711841409 0.356819372592072
66.1132789589465 2.0212766777719 0.327894375166624
66.1335025746375 2.0212766777719 0.327894375166624
66.1537261903286 2.18085115233284 0.340591728578921
66.1739498060197 2.65957457601566 0.376120643554402
66.1941734217107 2.34042562689378 0.352832438824499
66.2143970374018 2.28723413537347 0.348799935660385
66.2346206530929 2.18085115233284 0.340591728578921
66.2548442687839 2.60638308449535 0.372340440642192
66.275067884475 2.28723413537347 0.348799935660385
66.2952915001661 2.44680860993441 0.360762247785373
66.3155151158571 2.18085115233284 0.340591728578921
66.3357387315482 2.55319159297503 0.368521463374206
66.3559623472393 2.55319159297503 0.368521463374206
66.3761859629303 2.34042562689378 0.352832438824499
66.3964095786214 2.18085115233284 0.340591728578921
66.4166331943125 2.18085115233284 0.340591728578921
66.4368568100035 2.76595755905628 0.383569300189794
66.4570804256946 2.28723413537347 0.348799935660385
66.4773040413857 2.8191490505766 0.387239903442613
66.4975276570767 2.18085115233284 0.340591728578921
66.5177512727678 2.07446816929221 0.332180758076181
66.5379748884588 2.12765966081253 0.336412530691444
66.5581985041499 1.96808518625159 0.323551211550436
66.578422119841 2.07446816929221 0.332180758076181
66.598645735532 2.44680860993441 0.360762247785373
66.6188693512231 2.23404264385315 0.34472026390471
66.6390929669142 2.12765966081253 0.336412530691444
66.6593165826052 2.28723413537347 0.348799935660385
66.6795401982963 2.55319159297503 0.368521463374206
66.6997638139874 1.32978728800783 0.265957457601566
66.7199874296784 1.86170220321096 0.314685107616239
66.7402110453695 2.76595755905628 0.383569300189794
66.7604346610606 2.34042562689378 0.352832438824499
66.7806582767516 2.23404264385315 0.34472026390471
66.8008818924427 2.76595755905628 0.383569300189794
66.8211055081338 2.28723413537347 0.348799935660385
66.8413291238248 1.96808518625159 0.323551211550436
66.8615527395159 2.50000010145472 0.364662493543428
66.881776355207 2.28723413537347 0.348799935660385
66.901999970898 2.18085115233284 0.340591728578921
66.9222235865891 2.50000010145472 0.364662493543428
66.9424472022802 1.91489369473127 0.319148949121879
66.9626708179712 2.34042562689378 0.352832438824499
66.9828944336623 2.0212766777719 0.327894375166624
67.0031180493534 2.18085115233284 0.340591728578921
67.0233416650444 2.07446816929221 0.332180758076181
67.0435652807355 2.44680860993441 0.360762247785373
67.0637888964266 2.07446816929221 0.332180758076181
67.0840125121176 2.55319159297503 0.368521463374206
67.1042361278087 2.8191490505766 0.387239903442613
67.1244597434998 2.60638308449535 0.372340440642192
67.1446833591908 2.8191490505766 0.387239903442613
67.1649069748819 2.8191490505766 0.387239903442613
67.185130590573 2.07446816929221 0.332180758076181
67.205354206264 2.50000010145472 0.364662493543428
67.2255778219551 2.55319159297503 0.368521463374206
67.2458014376462 2.34042562689378 0.352832438824499
67.2660250533372 2.60638308449535 0.372340440642192
67.2862486690283 2.12765966081253 0.336412530691444
67.3064722847193 2.18085115233284 0.340591728578921
67.3266959004104 2.34042562689378 0.352832438824499
67.3469195161015 1.96808518625159 0.323551211550436
67.3671431317925 1.91489369473127 0.319148949121879
67.3873667474836 1.80851071169065 0.310157028270018
67.4075903631747 2.28723413537347 0.348799935660385
67.4278139788657 2.34042562689378 0.352832438824499
67.4480375945568 2.60638308449535 0.372340440642192
67.4682612102479 1.86170220321096 0.314685107616239
67.4884848259389 2.50000010145472 0.364662493543428
67.50870844163 2.50000010145472 0.364662493543428
67.5289320573211 2.71276606753597 0.37986322969976
67.5491556730121 2.34042562689378 0.352832438824499
67.5693792887032 2.76595755905628 0.383569300189794
67.5896029043943 2.23404264385315 0.34472026390471
67.6098265200853 2.44680860993441 0.360762247785373
67.6300501357764 2.50000010145472 0.364662493543428
67.6502737514675 2.44680860993441 0.360762247785373
67.6704973671585 1.91489369473127 0.319148949121879
67.6907209828496 2.39361711841409 0.356819372592072
67.7109445985407 2.34042562689378 0.352832438824499
67.7311682142317 2.39361711841409 0.356819372592072
67.7513918299228 2.39361711841409 0.356819372592072
67.7716154456139 1.86170220321096 0.314685107616239
67.7918390613049 2.39361711841409 0.356819372592072
67.812062676996 2.28723413537347 0.348799935660385
67.8322862926871 2.07446816929221 0.332180758076181
67.8525099083781 3.03191501665785 0.401586954343472
67.8727335240692 2.60638308449535 0.372340440642192
67.8929571397603 2.65957457601566 0.376120643554402
67.9131807554513 2.76595755905628 0.383569300189794
67.9334043711424 2.23404264385315 0.34472026390471
67.9536279868335 2.23404264385315 0.34472026390471
67.9738516025245 1.91489369473127 0.319148949121879
67.9940752182156 2.23404264385315 0.34472026390471
68.0142988339067 2.18085115233284 0.340591728578921
68.0345224495977 2.50000010145472 0.364662493543428
68.0547460652888 2.12765966081253 0.336412530691444
68.0749696809798 2.60638308449535 0.372340440642192
68.0951932966709 1.96808518625159 0.323551211550436
68.115416912362 2.0212766777719 0.327894375166624
68.135640528053 2.23404264385315 0.34472026390471
68.1558641437441 2.23404264385315 0.34472026390471
68.1760877594352 1.43617027104846 0.276391097530654
68.1963113751262 1.86170220321096 0.314685107616239
68.2165349908173 2.0212766777719 0.327894375166624
68.2367586065084 3.03191501665785 0.401586954343472
68.2569822221994 1.75531922017033 0.305561855301235
68.2772058378905 2.39361711841409 0.356819372592072
68.2974294535816 2.23404264385315 0.34472026390471
68.3176530692726 2.0212766777719 0.327894375166624
68.3378766849637 2.44680860993441 0.360762247785373
68.3581003006548 2.55319159297503 0.368521463374206
68.3783239163458 1.59574474560939 0.291341797730203
68.3985475320369 2.28723413537347 0.348799935660385
68.418771147728 2.44680860993441 0.360762247785373
68.438994763419 1.96808518625159 0.323551211550436
68.4592183791101 1.91489369473127 0.319148949121879
68.4794419948012 2.28723413537347 0.348799935660385
68.4996656104922 2.50000010145472 0.364662493543428
68.5198892261833 2.55319159297503 0.368521463374206
68.5401128418744 1.96808518625159 0.323551211550436
68.5603364575654 2.60638308449535 0.372340440642192
68.5805600732565 1.70212772865002 0.300896514843521
68.6007836889476 2.50000010145472 0.364662493543428
68.6210073046386 2.07446816929221 0.332180758076181
68.6412309203297 2.12765966081253 0.336412530691444
68.6614545360208 2.34042562689378 0.352832438824499
68.6816781517118 2.18085115233284 0.340591728578921
68.7019017674029 2.34042562689378 0.352832438824499
68.722125383094 2.12765966081253 0.336412530691444
68.742348998785 2.28723413537347 0.348799935660385
68.7625726144761 1.70212772865002 0.300896514843521
68.7827962301672 2.65957457601566 0.376120643554402
68.8030198458582 1.70212772865002 0.300896514843521
68.8232434615493 2.12765966081253 0.336412530691444
68.8434670772403 1.96808518625159 0.323551211550436
68.8636906929314 2.44680860993441 0.360762247785373
68.8839143086225 1.96808518625159 0.323551211550436
68.9041379243135 2.07446816929221 0.332180758076181
68.9243615400046 2.34042562689378 0.352832438824499
68.9445851556957 2.44680860993441 0.360762247785373
68.9648087713867 2.0212766777719 0.327894375166624
68.9850323870778 2.28723413537347 0.348799935660385
69.0052560027689 2.50000010145472 0.364662493543428
69.0254796184599 1.75531922017033 0.305561855301235
69.045703234151 2.55319159297503 0.368521463374206
69.0659268498421 2.18085115233284 0.340591728578921
69.0861504655331 2.55319159297503 0.368521463374206
69.1063740812242 1.96808518625159 0.323551211550436
69.1265976969153 2.60638308449535 0.372340440642192
69.1468213126063 2.07446816929221 0.332180758076181
69.1670449282974 2.44680860993441 0.360762247785373
69.1872685439885 1.80851071169065 0.310157028270018
69.2074921596795 1.86170220321096 0.314685107616239
69.2277157753706 2.07446816929221 0.332180758076181
69.2479393910617 2.44680860993441 0.360762247785373
69.2681630067527 2.39361711841409 0.356819372592072
69.2883866224438 2.23404264385315 0.34472026390471
69.3086102381349 2.23404264385315 0.34472026390471
69.3288338538259 1.91489369473127 0.319148949121879
69.349057469517 2.18085115233284 0.340591728578921
69.3692810852081 1.86170220321096 0.314685107616239
69.3895047008991 2.39361711841409 0.356819372592072
69.4097283165902 2.0212766777719 0.327894375166624
69.4299519322813 2.34042562689378 0.352832438824499
69.4501755479723 1.96808518625159 0.323551211550436
69.4703991636634 2.34042562689378 0.352832438824499
69.4906227793545 1.80851071169065 0.310157028270018
69.5108463950455 1.86170220321096 0.314685107616239
69.5310700107366 1.96808518625159 0.323551211550436
69.5512936264277 1.86170220321096 0.314685107616239
69.5715172421187 2.12765966081253 0.336412530691444
69.5917408578098 2.23404264385315 0.34472026390471
69.6119644735008 2.28723413537347 0.348799935660385
69.6321880891919 1.75531922017033 0.305561855301235
69.652411704883 2.18085115233284 0.340591728578921
69.672635320574 2.23404264385315 0.34472026390471
69.6928589362651 2.18085115233284 0.340591728578921
69.7130825519562 1.59574474560939 0.291341797730203
69.7333061676472 1.86170220321096 0.314685107616239
69.7535297833383 2.34042562689378 0.352832438824499
69.7737533990294 1.96808518625159 0.323551211550436
69.7939770147204 2.18085115233284 0.340591728578921
69.8142006304115 2.07446816929221 0.332180758076181
69.8344242461026 2.12765966081253 0.336412530691444
69.8546478617936 2.23404264385315 0.34472026390471
69.8748714774847 2.28723413537347 0.348799935660385
69.8950950931758 2.65957457601566 0.376120643554402
69.9153187088668 2.07446816929221 0.332180758076181
69.9355423245579 2.18085115233284 0.340591728578921
69.955765940249 2.34042562689378 0.352832438824499
69.97598955594 1.80851071169065 0.310157028270018
69.9962131716311 2.39361711841409 0.356819372592072
70.0164367873222 1.75531922017033 0.305561855301235
70.0366604030132 2.12765966081253 0.336412530691444
70.0568840187043 2.34042562689378 0.352832438824499
70.0771076343954 2.07446816929221 0.332180758076181
70.0973312500864 1.96808518625159 0.323551211550436
70.1175548657775 1.75531922017033 0.305561855301235
70.1377784814686 2.23404264385315 0.34472026390471
70.1580020971596 1.96808518625159 0.323551211550436
70.1782257128507 2.12765966081253 0.336412530691444
70.1984493285418 2.60638308449535 0.372340440642192
70.2186729442328 1.64893623712971 0.296157690892575
70.2388965599239 2.23404264385315 0.34472026390471
70.259120175615 2.0212766777719 0.327894375166624
70.279343791306 1.96808518625159 0.323551211550436
70.2995674069971 2.34042562689378 0.352832438824499
70.3197910226882 2.39361711841409 0.356819372592072
70.3400146383792 1.64893623712971 0.296157690892575
70.3602382540703 2.12765966081253 0.336412530691444
70.3804618697613 1.75531922017033 0.305561855301235
70.4006854854524 2.34042562689378 0.352832438824499
70.4209091011435 2.23404264385315 0.34472026390471
70.4411327168345 2.28723413537347 0.348799935660385
70.4613563325256 2.44680860993441 0.360762247785373
70.4815799482167 2.23404264385315 0.34472026390471
70.5018035639077 2.18085115233284 0.340591728578921
70.5220271795988 2.39361711841409 0.356819372592072
70.5422507952899 2.44680860993441 0.360762247785373
70.5624744109809 2.07446816929221 0.332180758076181
70.582698026672 1.2234043049672 0.255097431805139
70.6029216423631 2.39361711841409 0.356819372592072
70.6231452580541 2.12765966081253 0.336412530691444
70.6433688737452 1.75531922017033 0.305561855301235
70.6635924894363 1.54255325408908 0.286444948174184
70.6838161051273 1.86170220321096 0.314685107616239
70.7040397208184 2.07446816929221 0.332180758076181
70.7242633365095 2.12765966081253 0.336412530691444
70.7444869522005 2.07446816929221 0.332180758076181
70.7647105678916 2.60638308449535 0.372340440642192
70.7849341835827 2.18085115233284 0.340591728578921
70.8051577992737 2.60638308449535 0.372340440642192
70.8253814149648 1.86170220321096 0.314685107616239
70.8456050306559 2.8191490505766 0.387239903442613
70.8658286463469 2.23404264385315 0.34472026390471
70.886052262038 2.55319159297503 0.368521463374206
70.9062758777291 2.76595755905628 0.383569300189794
70.9264994934201 2.18085115233284 0.340591728578921
70.9467231091112 2.34042562689378 0.352832438824499
70.9669467248023 1.54255325408908 0.286444948174184
70.9871703404933 2.07446816929221 0.332180758076181
71.0073939561844 1.86170220321096 0.314685107616239
71.0276175718755 1.43617027104846 0.276391097530654
71.0478411875665 2.50000010145472 0.364662493543428
71.0680648032576 1.70212772865002 0.300896514843521
71.0882884189487 2.12765966081253 0.336412530691444
71.1085120346397 1.70212772865002 0.300896514843521
71.1287356503308 1.80851071169065 0.310157028270018
71.1489592660218 2.71276606753597 0.37986322969976
71.1691828817129 2.71276606753597 0.37986322969976
71.189406497404 1.80851071169065 0.310157028270018
71.209630113095 2.34042562689378 0.352832438824499
71.2298537287861 2.18085115233284 0.340591728578921
71.2500773444772 1.75531922017033 0.305561855301235
71.2703009601682 2.0212766777719 0.327894375166624
71.2905245758593 2.18085115233284 0.340591728578921
71.3107481915504 1.86170220321096 0.314685107616239
71.3309718072414 1.70212772865002 0.300896514843521
71.3511954229325 2.23404264385315 0.34472026390471
71.3714190386236 1.48936176256877 0.281462916854699
71.3916426543146 2.18085115233284 0.340591728578921
71.4118662700057 2.23404264385315 0.34472026390471
71.4320898856968 2.12765966081253 0.336412530691444
71.4523135013878 2.55319159297503 0.368521463374206
71.4725371170789 1.70212772865002 0.300896514843521
71.49276073277 1.80851071169065 0.310157028270018
71.512984348461 2.07446816929221 0.332180758076181
71.5332079641521 2.0212766777719 0.327894375166624
71.5534315798432 2.44680860993441 0.360762247785373
71.5736551955342 1.96808518625159 0.323551211550436
71.5938788112253 1.91489369473127 0.319148949121879
71.6141024269164 2.0212766777719 0.327894375166624
71.6343260426074 2.44680860993441 0.360762247785373
71.6545496582985 2.28723413537347 0.348799935660385
71.6747732739896 1.70212772865002 0.300896514843521
71.6949968896806 1.96808518625159 0.323551211550436
71.7152205053717 2.07446816929221 0.332180758076181
71.7354441210628 1.96808518625159 0.323551211550436
71.7556677367538 1.70212772865002 0.300896514843521
71.7758913524449 1.91489369473127 0.319148949121879
71.796114968136 1.64893623712971 0.296157690892575
71.816338583827 1.96808518625159 0.323551211550436
71.8365621995181 1.91489369473127 0.319148949121879
71.8567858152092 2.44680860993441 0.360762247785373
71.8770094309002 2.23404264385315 0.34472026390471
71.8972330465913 1.86170220321096 0.314685107616239
71.9174566622823 2.28723413537347 0.348799935660385
71.9376802779734 2.44680860993441 0.360762247785373
71.9579038936645 1.70212772865002 0.300896514843521
71.9781275093555 1.96808518625159 0.323551211550436
71.9983511250466 2.39361711841409 0.356819372592072
72.0185747407377 2.23404264385315 0.34472026390471
72.0387983564287 1.96808518625159 0.323551211550436
72.0590219721198 1.54255325408908 0.286444948174184
72.0792455878109 2.18085115233284 0.340591728578921
72.0994692035019 2.07446816929221 0.332180758076181
72.119692819193 1.75531922017033 0.305561855301235
72.1399164348841 2.18085115233284 0.340591728578921
72.1601400505751 1.70212772865002 0.300896514843521
72.1803636662662 2.0212766777719 0.327894375166624
72.2005872819573 1.86170220321096 0.314685107616239
72.2208108976483 2.55319159297503 0.368521463374206
72.2410345133394 2.39361711841409 0.356819372592072
72.2612581290305 2.44680860993441 0.360762247785373
72.2814817447215 1.96808518625159 0.323551211550436
72.3017053604126 2.07446816929221 0.332180758076181
72.3219289761037 2.18085115233284 0.340591728578921
72.3421525917947 1.64893623712971 0.296157690892575
72.3623762074858 1.80851071169065 0.310157028270018
72.3825998231769 2.18085115233284 0.340591728578921
72.4028234388679 1.86170220321096 0.314685107616239
72.423047054559 2.12765966081253 0.336412530691444
72.4432706702501 1.80851071169065 0.310157028270018
72.4634942859411 1.91489369473127 0.319148949121879
72.4837179016322 1.32978728800783 0.265957457601566
72.5039415173233 1.80851071169065 0.310157028270018
72.5241651330143 1.70212772865002 0.300896514843521
72.5443887487054 2.28723413537347 0.348799935660385
72.5646123643965 1.80851071169065 0.310157028270018
72.5848359800875 1.86170220321096 0.314685107616239
72.6050595957786 1.86170220321096 0.314685107616239
72.6252832114697 2.28723413537347 0.348799935660385
72.6455068271607 1.96808518625159 0.323551211550436
72.6657304428518 1.96808518625159 0.323551211550436
72.6859540585428 1.70212772865002 0.300896514843521
72.7061776742339 1.96808518625159 0.323551211550436
72.726401289925 2.0212766777719 0.327894375166624
72.746624905616 2.07446816929221 0.332180758076181
72.7668485213071 2.0212766777719 0.327894375166624
72.7870721369982 2.34042562689378 0.352832438824499
72.8072957526892 2.50000010145472 0.364662493543428
72.8275193683803 2.12765966081253 0.336412530691444
72.8477429840714 2.39361711841409 0.356819372592072
72.8679665997624 2.07446816929221 0.332180758076181
72.8881902154535 1.96808518625159 0.323551211550436
72.9084138311446 2.55319159297503 0.368521463374206
72.9286374468356 1.86170220321096 0.314685107616239
72.9488610625267 1.75531922017033 0.305561855301235
72.9690846782178 1.75531922017033 0.305561855301235
72.9893082939088 1.54255325408908 0.286444948174184
73.0095319095999 1.70212772865002 0.300896514843521
73.029755525291 1.86170220321096 0.314685107616239
73.049979140982 2.23404264385315 0.34472026390471
73.0702027566731 2.50000010145472 0.364662493543428
73.0904263723642 2.34042562689378 0.352832438824499
73.1106499880552 1.80851071169065 0.310157028270018
73.1308736037463 1.54255325408908 0.286444948174184
73.1510972194374 1.96808518625159 0.323551211550436
73.1713208351284 1.86170220321096 0.314685107616239
73.1915444508195 2.12765966081253 0.336412530691444
73.2117680665106 1.91489369473127 0.319148949121879
73.2319916822016 2.28723413537347 0.348799935660385
73.2522152978927 1.80851071169065 0.310157028270018
73.2724389135838 1.59574474560939 0.291341797730203
73.2926625292748 2.39361711841409 0.356819372592072
73.3128861449659 2.50000010145472 0.364662493543428
73.333109760657 2.28723413537347 0.348799935660385
73.353333376348 1.96808518625159 0.323551211550436
73.3735569920391 2.12765966081253 0.336412530691444
73.3937806077302 1.48936176256877 0.281462916854699
73.4140042234212 1.91489369473127 0.319148949121879
73.4342278391123 2.34042562689378 0.352832438824499
73.4544514548033 2.07446816929221 0.332180758076181
73.4746750704944 2.28723413537347 0.348799935660385
73.4948986861855 1.70212772865002 0.300896514843521
73.5151223018765 2.23404264385315 0.34472026390471
73.5353459175676 1.86170220321096 0.314685107616239
73.5555695332587 2.0212766777719 0.327894375166624
73.5757931489497 1.96808518625159 0.323551211550436
73.5960167646408 2.23404264385315 0.34472026390471
73.6162403803319 2.07446816929221 0.332180758076181
73.6364639960229 1.80851071169065 0.310157028270018
73.656687611714 1.80851071169065 0.310157028270018
73.6769112274051 1.64893623712971 0.296157690892575
73.6971348430961 1.27659579648752 0.260584025764691
73.7173584587872 1.91489369473127 0.319148949121879
73.7375820744783 1.80851071169065 0.310157028270018
73.7578056901693 2.0212766777719 0.327894375166624
73.7780293058604 2.50000010145472 0.364662493543428
73.7982529215515 2.44680860993441 0.360762247785373
73.8184765372425 2.07446816929221 0.332180758076181
73.8387001529336 1.86170220321096 0.314685107616239
73.8589237686247 1.80851071169065 0.310157028270018
73.8791473843157 2.0212766777719 0.327894375166624
73.8993710000068 1.70212772865002 0.300896514843521
73.9195946156979 2.12765966081253 0.336412530691444
73.9398182313889 2.07446816929221 0.332180758076181
73.96004184708 2.34042562689378 0.352832438824499
73.9802654627711 2.34042562689378 0.352832438824499
74.0004890784621 2.18085115233284 0.340591728578921
74.0207126941532 2.12765966081253 0.336412530691444
74.0409363098443 2.34042562689378 0.352832438824499
74.0611599255353 2.07446816929221 0.332180758076181
74.0813835412264 1.80851071169065 0.310157028270018
74.1016071569175 2.12765966081253 0.336412530691444
74.1218307726085 2.07446816929221 0.332180758076181
74.1420543882996 2.34042562689378 0.352832438824499
74.1622780039907 1.86170220321096 0.314685107616239
74.1825016196817 2.07446816929221 0.332180758076181
74.2027252353728 1.80851071169065 0.310157028270018
74.2229488510638 2.23404264385315 0.34472026390471
74.2431724667549 1.91489369473127 0.319148949121879
74.263396082446 1.43617027104846 0.276391097530654
74.283619698137 1.86170220321096 0.314685107616239
74.3038433138281 1.86170220321096 0.314685107616239
74.3240669295192 2.18085115233284 0.340591728578921
74.3442905452102 2.12765966081253 0.336412530691444
74.3645141609013 2.07446816929221 0.332180758076181
74.3847377765924 1.96808518625159 0.323551211550436
74.4049613922834 2.65957457601566 0.376120643554402
74.4251850079745 2.0212766777719 0.327894375166624
74.4454086236656 2.39361711841409 0.356819372592072
74.4656322393566 2.18085115233284 0.340591728578921
74.4858558550477 2.23404264385315 0.34472026390471
74.5060794707388 1.86170220321096 0.314685107616239
74.5263030864298 2.23404264385315 0.34472026390471
74.5465267021209 1.59574474560939 0.291341797730203
74.566750317812 2.12765966081253 0.336412530691444
74.586973933503 1.70212772865002 0.300896514843521
74.6071975491941 1.70212772865002 0.300896514843521
74.6274211648852 2.07446816929221 0.332180758076181
74.6476447805762 1.70212772865002 0.300896514843521
74.6678683962673 2.28723413537347 0.348799935660385
74.6880920119584 2.07446816929221 0.332180758076181
74.7083156276494 2.0212766777719 0.327894375166624
74.7285392433405 1.80851071169065 0.310157028270018
74.7487628590316 1.48936176256877 0.281462916854699
74.7689864747226 2.18085115233284 0.340591728578921
74.7892100904137 1.96808518625159 0.323551211550436
74.8094337061048 2.28723413537347 0.348799935660385
74.8296573217958 2.18085115233284 0.340591728578921
74.8498809374869 2.0212766777719 0.327894375166624
74.870104553178 1.96808518625159 0.323551211550436
74.890328168869 2.07446816929221 0.332180758076181
74.9105517845601 1.96808518625159 0.323551211550436
74.9307754002512 1.38297877952814 0.271224453219182
74.9509990159422 1.64893623712971 0.296157690892575
74.9712226316333 1.70212772865002 0.300896514843521
74.9914462473243 1.86170220321096 0.314685107616239
75.0116698630154 1.96808518625159 0.323551211550436
75.0318934787065 1.48936176256877 0.281462916854699
75.0521170943975 2.12765966081253 0.336412530691444
75.0723407100886 1.80851071169065 0.310157028270018
75.0925643257797 2.28723413537347 0.348799935660385
75.1127879414707 1.80851071169065 0.310157028270018
75.1330115571618 2.0212766777719 0.327894375166624
75.1532351728529 1.86170220321096 0.314685107616239
75.1734587885439 1.86170220321096 0.314685107616239
75.193682404235 1.96808518625159 0.323551211550436
75.2139060199261 1.75531922017033 0.305561855301235
75.2341296356171 1.43617027104846 0.276391097530654
75.2543532513082 1.96808518625159 0.323551211550436
75.2745768669993 1.86170220321096 0.314685107616239
75.2948004826903 2.0212766777719 0.327894375166624
75.3150240983814 1.91489369473127 0.319148949121879
75.3352477140725 2.07446816929221 0.332180758076181
75.3554713297635 2.07446816929221 0.332180758076181
75.3756949454546 1.75531922017033 0.305561855301235
75.3959185611457 2.0212766777719 0.327894375166624
75.4161421768367 1.91489369473127 0.319148949121879
75.4363657925278 2.0212766777719 0.327894375166624
75.4565894082189 2.28723413537347 0.348799935660385
75.4768130239099 1.75531922017033 0.305561855301235
75.497036639601 1.64893623712971 0.296157690892575
75.5172602552921 2.12765966081253 0.336412530691444
75.5374838709831 2.44680860993441 0.360762247785373
75.5577074866742 2.39361711841409 0.356819372592072
75.5779311023653 2.39361711841409 0.356819372592072
75.5981547180563 2.23404264385315 0.34472026390471
75.6183783337474 2.07446816929221 0.332180758076181
75.6386019494385 1.96808518625159 0.323551211550436
75.6588255651295 2.0212766777719 0.327894375166624
75.6790491808206 1.86170220321096 0.314685107616239
75.6992727965117 2.18085115233284 0.340591728578921
75.7194964122027 2.18085115233284 0.340591728578921
75.7397200278938 2.28723413537347 0.348799935660385
75.7599436435848 2.07446816929221 0.332180758076181
75.7801672592759 2.28723413537347 0.348799935660385
75.800390874967 1.32978728800783 0.265957457601566
75.820614490658 2.0212766777719 0.327894375166624
75.8408381063491 2.07446816929221 0.332180758076181
75.8610617220402 1.48936176256877 0.281462916854699
75.8812853377312 1.48936176256877 0.281462916854699
75.9015089534223 2.23404264385315 0.34472026390471
75.9217325691134 1.86170220321096 0.314685107616239
75.9419561848044 1.59574474560939 0.291341797730203
75.9621798004955 1.70212772865002 0.300896514843521
75.9824034161866 1.17021281344689 0.249490210115391
76.0026270318776 1.43617027104846 0.276391097530654
76.0228506475687 1.86170220321096 0.314685107616239
76.0430742632598 1.75531922017033 0.305561855301235
76.0632978789508 1.54255325408908 0.286444948174184
76.0835214946419 1.80851071169065 0.310157028270018
76.103745110333 1.54255325408908 0.286444948174184
76.123968726024 1.48936176256877 0.281462916854699
76.1441923417151 2.07446816929221 0.332180758076181
76.1644159574062 2.12765966081253 0.336412530691444
76.1846395730972 1.64893623712971 0.296157690892575
76.2048631887883 1.91489369473127 0.319148949121879
76.2250868044794 1.96808518625159 0.323551211550436
76.2453104201704 1.91489369473127 0.319148949121879
76.2655340358615 1.48936176256877 0.281462916854699
76.2857576515526 1.80851071169065 0.310157028270018
76.3059812672436 1.70212772865002 0.300896514843521
76.3262048829347 2.12765966081253 0.336412530691444
76.3464284986258 2.28723413537347 0.348799935660385
76.3666521143168 1.80851071169065 0.310157028270018
76.3868757300079 2.12765966081253 0.336412530691444
76.407099345699 1.80851071169065 0.310157028270018
76.42732296139 1.64893623712971 0.296157690892575
76.4475465770811 1.32978728800783 0.265957457601566
76.4677701927722 1.11702132192658 0.243754036219437
76.4879938084632 1.27659579648752 0.260584025764691
76.5082174241543 2.44680860993441 0.360762247785373
76.5284410398453 1.70212772865002 0.300896514843521
76.5486646555364 1.86170220321096 0.314685107616239
76.5688882712275 1.59574474560939 0.291341797730203
76.5891118869185 1.80851071169065 0.310157028270018
76.6093355026096 1.48936176256877 0.281462916854699
76.6295591183007 2.23404264385315 0.34472026390471
76.6497827339917 1.54255325408908 0.286444948174184
76.6700063496828 1.59574474560939 0.291341797730203
76.6902299653739 1.48936176256877 0.281462916854699
76.7104535810649 1.96808518625159 0.323551211550436
76.730677196756 1.86170220321096 0.314685107616239
76.7509008124471 1.64893623712971 0.296157690892575
76.7711244281381 2.12765966081253 0.336412530691444
76.7913480438292 1.32978728800783 0.265957457601566
76.8115716595203 1.43617027104846 0.276391097530654
76.8317952752113 2.0212766777719 0.327894375166624
76.8520188909024 1.75531922017033 0.305561855301235
76.8722425065935 1.91489369473127 0.319148949121879
76.8924661222845 1.70212772865002 0.300896514843521
76.9126897379756 1.75531922017033 0.305561855301235
76.9329133536667 2.07446816929221 0.332180758076181
76.9531369693577 1.91489369473127 0.319148949121879
76.9733605850488 1.48936176256877 0.281462916854699
76.9935842007399 1.11702132192658 0.243754036219437
77.0138078164309 1.96808518625159 0.323551211550436
77.034031432122 1.54255325408908 0.286444948174184
77.0542550478131 1.75531922017033 0.305561855301235
77.0744786635041 1.43617027104846 0.276391097530654
77.0947022791952 1.38297877952814 0.271224453219182
77.1149258948863 1.91489369473127 0.319148949121879
77.1351495105773 1.32978728800783 0.265957457601566
77.1553731262684 1.80851071169065 0.310157028270018
77.1755967419595 1.91489369473127 0.319148949121879
77.1958203576505 1.80851071169065 0.310157028270018
77.2160439733416 2.07446816929221 0.332180758076181
77.2362675890327 1.86170220321096 0.314685107616239
77.2564912047237 2.28723413537347 0.348799935660385
77.2767148204148 1.70212772865002 0.300896514843521
77.2969384361058 1.86170220321096 0.314685107616239
77.3171620517969 1.32978728800783 0.265957457601566
77.337385667488 2.39361711841409 0.356819372592072
77.357609283179 1.64893623712971 0.296157690892575
77.3778328988701 1.96808518625159 0.323551211550436
77.3980565145612 1.01063833888595 0.231856336193246
77.4182801302522 1.2234043049672 0.255097431805139
77.4385037459433 1.54255325408908 0.286444948174184
77.4587273616344 1.91489369473127 0.319148949121879
77.4789509773254 1.64893623712971 0.296157690892575
77.4991745930165 1.43617027104846 0.276391097530654
77.5193982087076 1.59574474560939 0.291341797730203
77.5396218243986 1.86170220321096 0.314685107616239
77.5598454400897 1.43617027104846 0.276391097530654
77.5800690557808 1.70212772865002 0.300896514843521
77.6002926714718 2.44680860993441 0.360762247785373
77.6205162871629 1.64893623712971 0.296157690892575
77.640739902854 1.91489369473127 0.319148949121879
77.660963518545 1.59574474560939 0.291341797730203
77.6811871342361 1.64893623712971 0.296157690892575
77.7014107499272 1.80851071169065 0.310157028270018
77.7216343656182 1.38297877952814 0.271224453219182
77.7418579813093 2.0212766777719 0.327894375166624
77.7620815970004 1.59574474560939 0.291341797730203
77.7823052126914 2.28723413537347 0.348799935660385
77.8025288283825 1.27659579648752 0.260584025764691
77.8227524440736 2.0212766777719 0.327894375166624
77.8429760597646 1.64893623712971 0.296157690892575
77.8631996754557 1.48936176256877 0.281462916854699
77.8834232911468 1.43617027104846 0.276391097530654
77.9036469068378 2.12765966081253 0.336412530691444
77.9238705225289 2.0212766777719 0.327894375166624
77.94409413822 1.64893623712971 0.296157690892575
77.964317753911 1.27659579648752 0.260584025764691
77.9845413696021 1.32978728800783 0.265957457601566
78.0047649852932 1.80851071169065 0.310157028270018
78.0249886009842 1.59574474560939 0.291341797730203
78.0452122166753 1.59574474560939 0.291341797730203
78.0654358323663 1.80851071169065 0.310157028270018
78.0856594480574 2.23404264385315 0.34472026390471
78.1058830637485 1.43617027104846 0.276391097530654
78.1261066794395 1.59574474560939 0.291341797730203
78.1463302951306 1.64893623712971 0.296157690892575
78.1665539108217 2.07446816929221 0.332180758076181
78.1867775265127 1.38297877952814 0.271224453219182
78.2070011422038 1.54255325408908 0.286444948174184
78.2272247578949 2.23404264385315 0.34472026390471
78.2474483735859 2.44680860993441 0.360762247785373
78.267671989277 1.43617027104846 0.276391097530654
78.2878956049681 1.64893623712971 0.296157690892575
78.3081192206591 1.59574474560939 0.291341797730203
78.3283428363502 1.38297877952814 0.271224453219182
78.3485664520413 1.59574474560939 0.291341797730203
78.3687900677323 1.75531922017033 0.305561855301235
78.3890136834234 1.17021281344689 0.249490210115391
78.4092372991145 1.86170220321096 0.314685107616239
78.4294609148055 1.75531922017033 0.305561855301235
78.4496845304966 1.80851071169065 0.310157028270018
78.4699081461877 1.43617027104846 0.276391097530654
78.4901317618787 1.96808518625159 0.323551211550436
78.5103553775698 2.23404264385315 0.34472026390471
78.5305789932609 1.17021281344689 0.249490210115391
78.5508026089519 1.59574474560939 0.291341797730203
78.571026224643 1.91489369473127 0.319148949121879
78.5912498403341 1.59574474560939 0.291341797730203
78.6114734560251 1.96808518625159 0.323551211550436
78.6316970717162 1.91489369473127 0.319148949121879
78.6519206874073 1.27659579648752 0.260584025764691
78.6721443030983 1.38297877952814 0.271224453219182
78.6923679187894 1.17021281344689 0.249490210115391
78.7125915344805 1.86170220321096 0.314685107616239
78.7328151501715 1.43617027104846 0.276391097530654
78.7530387658626 1.70212772865002 0.300896514843521
78.7732623815537 1.27659579648752 0.260584025764691
78.7934859972447 1.54255325408908 0.286444948174184
78.8137096129358 1.43617027104846 0.276391097530654
78.8339332286268 1.54255325408908 0.286444948174184
78.8541568443179 1.70212772865002 0.300896514843521
78.874380460009 2.07446816929221 0.332180758076181
78.8946040757 1.64893623712971 0.296157690892575
78.9148276913911 1.48936176256877 0.281462916854699
78.9350513070822 1.32978728800783 0.265957457601566
78.9552749227732 1.64893623712971 0.296157690892575
78.9754985384643 1.54255325408908 0.286444948174184
78.9957221541554 1.17021281344689 0.249490210115391
79.0159457698464 1.80851071169065 0.310157028270018
79.0361693855375 1.75531922017033 0.305561855301235
79.0563930012286 1.91489369473127 0.319148949121879
79.0766166169196 1.38297877952814 0.271224453219182
79.0968402326107 1.80851071169065 0.310157028270018
79.1170638483018 1.75531922017033 0.305561855301235
79.1372874639928 1.2234043049672 0.255097431805139
79.1575110796839 1.96808518625159 0.323551211550436
79.177734695375 1.64893623712971 0.296157690892575
79.197958311066 1.59574474560939 0.291341797730203
79.2181819267571 1.70212772865002 0.300896514843521
79.2384055424482 2.07446816929221 0.332180758076181
79.2586291581392 2.0212766777719 0.327894375166624
79.2788527738303 1.38297877952814 0.271224453219182
79.2990763895214 1.91489369473127 0.319148949121879
79.3193000052124 1.32978728800783 0.265957457601566
79.3395236209035 2.07446816929221 0.332180758076181
79.3597472365946 2.23404264385315 0.34472026390471
79.3799708522856 1.75531922017033 0.305561855301235
79.4001944679767 1.48936176256877 0.281462916854699
79.4204180836678 1.75531922017033 0.305561855301235
79.4406416993588 1.48936176256877 0.281462916854699
79.4608653150499 1.32978728800783 0.265957457601566
79.481088930741 1.96808518625159 0.323551211550436
79.501312546432 0.957446847365637 0.225672386132641
79.5215361621231 1.64893623712971 0.296157690892575
79.5417597778142 1.27659579648752 0.260584025764691
79.5619833935052 1.43617027104846 0.276391097530654
79.5822070091963 1.54255325408908 0.286444948174184
79.6024306248873 1.48936176256877 0.281462916854699
79.6226542405784 2.23404264385315 0.34472026390471
79.6428778562695 1.80851071169065 0.310157028270018
79.6631014719605 1.91489369473127 0.319148949121879
79.6833250876516 1.48936176256877 0.281462916854699
79.7035487033427 1.80851071169065 0.310157028270018
79.7237723190337 1.54255325408908 0.286444948174184
79.7439959347248 1.43617027104846 0.276391097530654
79.7642195504159 1.59574474560939 0.291341797730203
79.7844431661069 1.2234043049672 0.255097431805139
79.804666781798 1.32978728800783 0.265957457601566
79.8248903974891 1.43617027104846 0.276391097530654
79.8451140131801 1.48936176256877 0.281462916854699
79.8653376288712 1.75531922017033 0.305561855301235
79.8855612445623 2.0212766777719 0.327894375166624
79.9057848602533 2.44680860993441 0.360762247785373
79.9260084759444 1.70212772865002 0.300896514843521
79.9462320916355 1.54255325408908 0.286444948174184
79.9664557073265 1.38297877952814 0.271224453219182
79.9866793230176 1.54255325408908 0.286444948174184
80.0069029387087 1.70212772865002 0.300896514843521
80.0271265543997 1.64893623712971 0.296157690892575
80.0473501700908 1.43617027104846 0.276391097530654
80.0675737857819 1.91489369473127 0.319148949121879
80.0877974014729 1.54255325408908 0.286444948174184
80.108021017164 1.06382983040626 0.237879581728048
80.1282446328551 1.86170220321096 0.314685107616239
80.1484682485461 1.64893623712971 0.296157690892575
80.1686918642372 1.59574474560939 0.291341797730203
80.1889154799283 1.38297877952814 0.271224453219182
80.2091390956193 1.75531922017033 0.305561855301235
80.2293627113104 1.01063833888595 0.231856336193246
80.2495863270015 2.18085115233284 0.340591728578921
80.2698099426925 1.38297877952814 0.271224453219182
80.2900335583836 1.48936176256877 0.281462916854699
80.3102571740747 1.54255325408908 0.286444948174184
80.3304807897657 1.54255325408908 0.286444948174184
80.3507044054568 1.75531922017033 0.305561855301235
80.3709280211478 1.80851071169065 0.310157028270018
80.3911516368389 1.96808518625159 0.323551211550436
80.41137525253 1.54255325408908 0.286444948174184
80.431598868221 1.75531922017033 0.305561855301235
80.4518224839121 2.0212766777719 0.327894375166624
80.4720460996032 2.07446816929221 0.332180758076181
80.4922697152942 2.18085115233284 0.340591728578921
80.5124933309853 1.75531922017033 0.305561855301235
80.5327169466764 1.64893623712971 0.296157690892575
80.5529405623674 1.75531922017033 0.305561855301235
80.5731641780585 1.32978728800783 0.265957457601566
80.5933877937496 1.32978728800783 0.265957457601566
80.6136114094406 1.75531922017033 0.305561855301235
80.6338350251317 1.70212772865002 0.300896514843521
80.6540586408228 1.86170220321096 0.314685107616239
80.6742822565138 1.2234043049672 0.255097431805139
80.6945058722049 1.32978728800783 0.265957457601566
80.714729487896 1.64893623712971 0.296157690892575
80.734953103587 1.80851071169065 0.310157028270018
80.7551767192781 1.48936176256877 0.281462916854699
80.7754003349692 1.27659579648752 0.260584025764691
80.7956239506602 2.07446816929221 0.332180758076181
80.8158475663513 1.70212772865002 0.300896514843521
80.8360711820424 1.43617027104846 0.276391097530654
80.8562947977334 1.27659579648752 0.260584025764691
80.8765184134245 1.27659579648752 0.260584025764691
80.8967420291156 2.0212766777719 0.327894375166624
80.9169656448066 1.91489369473127 0.319148949121879
80.9371892604977 1.64893623712971 0.296157690892575
80.9574128761888 1.2234043049672 0.255097431805139
80.9776364918798 2.12765966081253 0.336412530691444
80.9978601075709 1.70212772865002 0.300896514843521
81.018083723262 1.48936176256877 0.281462916854699
81.038307338953 1.43617027104846 0.276391097530654
81.0585309546441 1.54255325408908 0.286444948174184
81.0787545703352 1.48936176256877 0.281462916854699
81.0989781860262 1.43617027104846 0.276391097530654
81.1192018017173 1.75531922017033 0.305561855301235
81.1394254174083 1.32978728800783 0.265957457601566
81.1596490330994 1.70212772865002 0.300896514843521
81.1798726487905 1.70212772865002 0.300896514843521
81.2000962644815 1.48936176256877 0.281462916854699
81.2203198801726 1.32978728800783 0.265957457601566
81.2405434958637 1.48936176256877 0.281462916854699
81.2607671115547 1.70212772865002 0.300896514843521
81.2809907272458 1.32978728800783 0.265957457601566
81.3012143429369 1.54255325408908 0.286444948174184
81.3214379586279 1.48936176256877 0.281462916854699
81.341661574319 1.43617027104846 0.276391097530654
81.3618851900101 1.48936176256877 0.281462916854699
81.3821088057011 1.96808518625159 0.323551211550436
81.4023324213922 1.86170220321096 0.314685107616239
81.4225560370833 1.2234043049672 0.255097431805139
81.4427796527743 1.59574474560939 0.291341797730203
81.4630032684654 1.64893623712971 0.296157690892575
81.4832268841565 1.43617027104846 0.276391097530654
81.5034504998475 1.17021281344689 0.249490210115391
81.5236741155386 1.48936176256877 0.281462916854699
81.5438977312297 1.43617027104846 0.276391097530654
81.5641213469207 1.2234043049672 0.255097431805139
81.5843449626118 1.80851071169065 0.310157028270018
81.6045685783029 1.2234043049672 0.255097431805139
81.6247921939939 1.91489369473127 0.319148949121879
81.645015809685 1.70212772865002 0.300896514843521
81.6652394253761 1.06382983040626 0.237879581728048
81.6854630410671 1.75531922017033 0.305561855301235
81.7056866567582 1.96808518625159 0.323551211550436
81.7259102724493 1.2234043049672 0.255097431805139
81.7461338881403 1.80851071169065 0.310157028270018
81.7663575038314 1.38297877952814 0.271224453219182
81.7865811195225 1.32978728800783 0.265957457601566
81.8068047352135 1.70212772865002 0.300896514843521
81.8270283509046 1.86170220321096 0.314685107616239
81.8472519665957 1.80851071169065 0.310157028270018
81.8674755822867 1.70212772865002 0.300896514843521
81.8876991979778 1.32978728800783 0.265957457601566
81.9079228136688 1.32978728800783 0.265957457601566
81.9281464293599 1.70212772865002 0.300896514843521
81.948370045051 1.48936176256877 0.281462916854699
81.968593660742 1.48936176256877 0.281462916854699
81.9888172764331 1.59574474560939 0.291341797730203
82.0090408921242 1.75531922017033 0.305561855301235
82.0292645078152 1.59574474560939 0.291341797730203
82.0494881235063 1.75531922017033 0.305561855301235
82.0697117391974 1.48936176256877 0.281462916854699
82.0899353548884 1.54255325408908 0.286444948174184
82.1101589705795 1.91489369473127 0.319148949121879
82.1303825862706 1.75531922017033 0.305561855301235
82.1506062019616 1.59574474560939 0.291341797730203
82.1708298176527 1.06382983040626 0.237879581728048
82.1910534333438 1.48936176256877 0.281462916854699
82.2112770490348 1.43617027104846 0.276391097530654
82.2315006647259 1.43617027104846 0.276391097530654
82.251724280417 1.27659579648752 0.260584025764691
82.271947896108 0.904255355845324 0.219314137922397
82.2921715117991 2.07446816929221 0.332180758076181
82.3123951274902 1.75531922017033 0.305561855301235
82.3326187431812 1.32978728800783 0.265957457601566
82.3528423588723 1.54255325408908 0.286444948174184
82.3730659745634 1.54255325408908 0.286444948174184
82.3932895902544 2.18085115233284 0.340591728578921
82.4135132059455 1.17021281344689 0.249490210115391
82.4337368216366 1.59574474560939 0.291341797730203
82.4539604373276 1.64893623712971 0.296157690892575
82.4741840530187 1.2234043049672 0.255097431805139
82.4944076687098 1.43617027104846 0.276391097530654
82.5146312844008 1.43617027104846 0.276391097530654
82.5348549000919 1.80851071169065 0.310157028270018
82.555078515783 1.27659579648752 0.260584025764691
82.575302131474 1.54255325408908 0.286444948174184
82.5955257471651 1.59574474560939 0.291341797730203
82.6157493628562 1.80851071169065 0.310157028270018
82.6359729785472 1.86170220321096 0.314685107616239
82.6561965942383 1.06382983040626 0.237879581728048
82.6764202099293 1.48936176256877 0.281462916854699
82.6966438256204 1.38297877952814 0.271224453219182
82.7168674413115 1.70212772865002 0.300896514843521
82.7370910570025 1.54255325408908 0.286444948174184
82.7573146726936 1.2234043049672 0.255097431805139
82.7775382883847 1.96808518625159 0.323551211550436
82.7977619040757 1.17021281344689 0.249490210115391
82.8179855197668 1.91489369473127 0.319148949121879
82.8382091354579 1.27659579648752 0.260584025764691
82.8584327511489 1.27659579648752 0.260584025764691
82.87865636684 1.80851071169065 0.310157028270018
82.8988799825311 1.27659579648752 0.260584025764691
82.9191035982221 1.06382983040626 0.237879581728048
82.9393272139132 1.32978728800783 0.265957457601566
82.9595508296043 1.86170220321096 0.314685107616239
82.9797744452953 1.75531922017033 0.305561855301235
82.9999980609864 1.80851071169065 0.310157028270018
83.0202216766775 1.48936176256877 0.281462916854699
83.0404452923685 1.86170220321096 0.314685107616239
83.0606689080596 1.38297877952814 0.271224453219182
83.0808925237507 1.75531922017033 0.305561855301235
83.1011161394417 1.54255325408908 0.286444948174184
83.1213397551328 1.32978728800783 0.265957457601566
83.1415633708239 1.01063833888595 0.231856336193246
83.1617869865149 1.48936176256877 0.281462916854699
83.182010602206 1.2234043049672 0.255097431805139
83.2022342178971 1.54255325408908 0.286444948174184
83.2224578335881 2.0212766777719 0.327894375166624
83.2426814492792 1.80851071169065 0.310157028270018
83.2629050649703 1.48936176256877 0.281462916854699
83.2831286806613 1.48936176256877 0.281462916854699
83.3033522963524 1.43617027104846 0.276391097530654
83.3235759120435 1.43617027104846 0.276391097530654
83.3437995277345 1.48936176256877 0.281462916854699
83.3640231434256 1.86170220321096 0.314685107616239
83.3842467591167 1.11702132192658 0.243754036219437
83.4044703748077 1.17021281344689 0.249490210115391
83.4246939904988 1.32978728800783 0.265957457601566
83.4449176061898 1.48936176256877 0.281462916854699
83.4651412218809 1.17021281344689 0.249490210115391
83.485364837572 0.904255355845324 0.219314137922397
83.505588453263 1.38297877952814 0.271224453219182
83.5258120689541 1.59574474560939 0.291341797730203
83.5460356846452 1.27659579648752 0.260584025764691
83.5662593003362 1.54255325408908 0.286444948174184
83.5864829160273 1.17021281344689 0.249490210115391
83.6067065317184 1.38297877952814 0.271224453219182
83.6269301474094 1.11702132192658 0.243754036219437
83.6471537631005 1.27659579648752 0.260584025764691
83.6673773787916 1.17021281344689 0.249490210115391
83.6876009944826 1.70212772865002 0.300896514843521
83.7078246101737 1.38297877952814 0.271224453219182
83.7280482258648 1.27659579648752 0.260584025764691
83.7482718415558 1.64893623712971 0.296157690892575
83.7684954572469 1.27659579648752 0.260584025764691
83.788719072938 1.75531922017033 0.305561855301235
83.808942688629 1.64893623712971 0.296157690892575
83.8291663043201 1.64893623712971 0.296157690892575
83.8493899200112 1.43617027104846 0.276391097530654
83.8696135357022 1.32978728800783 0.265957457601566
83.8898371513933 1.38297877952814 0.271224453219182
83.9100607670844 1.17021281344689 0.249490210115391
83.9302843827754 1.38297877952814 0.271224453219182
83.9505079984665 1.75531922017033 0.305561855301235
83.9707316141576 1.27659579648752 0.260584025764691
83.9909552298486 1.86170220321096 0.314685107616239
84.0111788455397 0.904255355845324 0.219314137922397
84.0314024612308 1.70212772865002 0.300896514843521
84.0516260769218 1.86170220321096 0.314685107616239
84.0718496926129 0.797872372804697 0.206009760818106
84.092073308304 1.06382983040626 0.237879581728048
84.112296923995 1.27659579648752 0.260584025764691
84.1325205396861 1.48936176256877 0.281462916854699
84.1527441553772 1.38297877952814 0.271224453219182
84.1729677710682 1.2234043049672 0.255097431805139
84.1931913867593 1.54255325408908 0.286444948174184
84.2134150024503 1.2234043049672 0.255097431805139
84.2336386181414 1.64893623712971 0.296157690892575
84.2538622338325 1.11702132192658 0.243754036219437
84.2740858495235 1.17021281344689 0.249490210115391
84.2943094652146 1.48936176256877 0.281462916854699
84.3145330809057 1.32978728800783 0.265957457601566
84.3347566965967 1.59574474560939 0.291341797730203
84.3549803122878 0.904255355845324 0.219314137922397
84.3752039279789 1.06382983040626 0.237879581728048
84.3954275436699 1.48936176256877 0.281462916854699
84.415651159361 1.32978728800783 0.265957457601566
84.4358747750521 1.06382983040626 0.237879581728048
84.4560983907431 1.32978728800783 0.265957457601566
84.4763220064342 1.32978728800783 0.265957457601566
84.4965456221253 1.32978728800783 0.265957457601566
84.5167692378163 1.70212772865002 0.300896514843521
84.5369928535074 1.17021281344689 0.249490210115391
84.5572164691985 1.27659579648752 0.260584025764691
84.5774400848895 1.59574474560939 0.291341797730203
84.5976637005806 1.32978728800783 0.265957457601566
84.6178873162717 1.27659579648752 0.260584025764691
84.6381109319627 1.70212772865002 0.300896514843521
84.6583345476538 1.80851071169065 0.310157028270018
84.6785581633449 1.2234043049672 0.255097431805139
84.6987817790359 0.957446847365637 0.225672386132641
84.719005394727 1.54255325408908 0.286444948174184
84.7392290104181 1.86170220321096 0.314685107616239
84.7594526261091 1.01063833888595 0.231856336193246
84.7796762418002 1.64893623712971 0.296157690892575
84.7998998574913 1.17021281344689 0.249490210115391
84.8201234731823 1.06382983040626 0.237879581728048
84.8403470888734 1.2234043049672 0.255097431805139
84.8605707045645 1.59574474560939 0.291341797730203
84.8807943202555 1.17021281344689 0.249490210115391
84.9010179359466 1.11702132192658 0.243754036219437
84.9212415516377 1.32978728800783 0.265957457601566
84.9414651673287 1.48936176256877 0.281462916854699
84.9616887830198 1.70212772865002 0.300896514843521
84.9819123987108 1.06382983040626 0.237879581728048
85.0021360144019 1.75531922017033 0.305561855301235
85.022359630093 1.2234043049672 0.255097431805139
85.042583245784 1.38297877952814 0.271224453219182
85.0628068614751 1.32978728800783 0.265957457601566
85.0830304771662 1.59574474560939 0.291341797730203
85.1032540928572 1.38297877952814 0.271224453219182
85.1234777085483 0.851063864325011 0.212765966081253
85.1437013242394 1.2234043049672 0.255097431805139
85.1639249399304 1.38297877952814 0.271224453219182
85.1841485556215 1.01063833888595 0.231856336193246
85.2043721713126 1.01063833888595 0.231856336193246
85.2245957870036 1.11702132192658 0.243754036219437
85.2448194026947 1.59574474560939 0.291341797730203
85.2650430183858 1.64893623712971 0.296157690892575
85.2852666340768 1.48936176256877 0.281462916854699
85.3054902497679 1.91489369473127 0.319148949121879
85.325713865459 1.38297877952814 0.271224453219182
85.34593748115 1.38297877952814 0.271224453219182
85.3661610968411 1.27659579648752 0.260584025764691
85.3863847125322 1.75531922017033 0.305561855301235
85.4066083282232 1.54255325408908 0.286444948174184
85.4268319439143 1.59574474560939 0.291341797730203
85.4470555596054 1.38297877952814 0.271224453219182
85.4672791752964 1.27659579648752 0.260584025764691
85.4875027909875 1.43617027104846 0.276391097530654
85.5077264066786 1.2234043049672 0.255097431805139
85.5279500223696 0.957446847365637 0.225672386132641
85.5481736380607 0.797872372804697 0.206009760818106
85.5683972537518 1.48936176256877 0.281462916854699
85.5886208694428 1.32978728800783 0.265957457601566
85.6088444851339 1.27659579648752 0.260584025764691
85.629068100825 1.27659579648752 0.260584025764691
85.649291716516 1.06382983040626 0.237879581728048
85.6695153322071 1.2234043049672 0.255097431805139
85.6897389478981 1.17021281344689 0.249490210115391
85.7099625635892 0.851063864325011 0.212765966081253
85.7301861792803 1.32978728800783 0.265957457601566
85.7504097949713 0.904255355845324 0.219314137922397
85.7706334106624 0.638297898243758 0.184260731687103
85.7908570263535 1.17021281344689 0.249490210115391
85.8110806420445 1.64893623712971 0.296157690892575
85.8313042577356 1.27659579648752 0.260584025764691
85.8515278734267 0.638297898243758 0.184260731687103
85.8717514891177 1.75531922017033 0.305561855301235
85.8919751048088 1.48936176256877 0.281462916854699
85.9121987204999 1.01063833888595 0.231856336193246
85.9324223361909 1.27659579648752 0.260584025764691
85.952645951882 1.01063833888595 0.231856336193246
85.9728695675731 1.17021281344689 0.249490210115391
85.9930931832641 1.75531922017033 0.305561855301235
86.0133167989552 1.54255325408908 0.286444948174184
86.0335404146463 0.851063864325011 0.212765966081253
86.0537640303373 1.2234043049672 0.255097431805139
86.0739876460284 1.48936176256877 0.281462916854699
86.0942112617195 1.32978728800783 0.265957457601566
86.1144348774105 1.06382983040626 0.237879581728048
86.1346584931016 0.851063864325011 0.212765966081253
86.1548821087927 1.48936176256877 0.281462916854699
86.1751057244837 1.43617027104846 0.276391097530654
86.1953293401748 1.48936176256877 0.281462916854699
86.2155529558659 1.2234043049672 0.255097431805139
86.2357765715569 1.43617027104846 0.276391097530654
86.256000187248 1.38297877952814 0.271224453219182
86.2762238029391 1.64893623712971 0.296157690892575
86.2964474186301 1.32978728800783 0.265957457601566
86.3166710343212 1.27659579648752 0.260584025764691
86.3368946500123 0.691489389764071 0.191784650094897
86.3571182657033 1.06382983040626 0.237879581728048
86.3773418813944 1.06382983040626 0.237879581728048
86.3975654970855 1.54255325408908 0.286444948174184
86.4177891127765 0.744680881284384 0.199024337160503
86.4380127284676 1.06382983040626 0.237879581728048
86.4582363441586 1.54255325408908 0.286444948174184
86.4784599598497 1.11702132192658 0.243754036219437
86.4986835755408 0.851063864325011 0.212765966081253
86.5189071912318 1.43617027104846 0.276391097530654
86.5391308069229 1.06382983040626 0.237879581728048
86.559354422614 1.11702132192658 0.243754036219437
86.579578038305 0.904255355845324 0.219314137922397
86.5998016539961 1.27659579648752 0.260584025764691
86.6200252696872 1.43617027104846 0.276391097530654
86.6402488853782 1.32978728800783 0.265957457601566
86.6604725010693 1.86170220321096 0.314685107616239
86.6806961167604 1.48936176256877 0.281462916854699
86.7009197324514 1.2234043049672 0.255097431805139
86.7211433481425 1.32978728800783 0.265957457601566
86.7413669638336 0.957446847365637 0.225672386132641
86.7615905795246 1.01063833888595 0.231856336193246
86.7818141952157 1.06382983040626 0.237879581728048
86.8020378109068 1.17021281344689 0.249490210115391
86.8222614265978 1.38297877952814 0.271224453219182
86.8424850422889 1.43617027104846 0.276391097530654
86.86270865798 0.531914915203132 0.168206265345722
86.882932273671 1.70212772865002 0.300896514843521
86.9031558893621 1.27659579648752 0.260584025764691
86.9233795050532 0.904255355845324 0.219314137922397
86.9436031207442 1.27659579648752 0.260584025764691
86.9638267364353 0.851063864325011 0.212765966081253
86.9840503521264 1.43617027104846 0.276391097530654
87.0042739678174 1.70212772865002 0.300896514843521
87.0244975835085 1.59574474560939 0.291341797730203
87.0447211991996 1.43617027104846 0.276391097530654
87.0649448148906 1.70212772865002 0.300896514843521
87.0851684305817 0.957446847365637 0.225672386132641
87.1053920462728 1.38297877952814 0.271224453219182
87.1256156619638 1.27659579648752 0.260584025764691
87.1458392776549 1.17021281344689 0.249490210115391
87.166062893346 1.2234043049672 0.255097431805139
87.186286509037 1.01063833888595 0.231856336193246
87.2065101247281 0.851063864325011 0.212765966081253
87.2267337404191 0.957446847365637 0.225672386132641
87.2469573561102 1.48936176256877 0.281462916854699
87.2671809718013 1.06382983040626 0.237879581728048
87.2874045874923 1.01063833888595 0.231856336193246
87.3076282031834 1.17021281344689 0.249490210115391
87.3278518188745 1.43617027104846 0.276391097530654
87.3480754345655 1.54255325408908 0.286444948174184
87.3682990502566 1.2234043049672 0.255097431805139
87.3885226659477 1.17021281344689 0.249490210115391
87.4087462816387 0.691489389764071 0.191784650094897
87.4289698973298 1.54255325408908 0.286444948174184
87.4491935130209 1.54255325408908 0.286444948174184
87.4694171287119 1.06382983040626 0.237879581728048
87.489640744403 1.27659579648752 0.260584025764691
87.5098643600941 1.2234043049672 0.255097431805139
87.5300879757851 1.70212772865002 0.300896514843521
87.5503115914762 1.2234043049672 0.255097431805139
87.5705352071673 0.957446847365637 0.225672386132641
87.5907588228583 1.32978728800783 0.265957457601566
87.6109824385494 1.11702132192658 0.243754036219437
87.6312060542405 1.01063833888595 0.231856336193246
87.6514296699315 0.904255355845324 0.219314137922397
87.6716532856226 0.744680881284384 0.199024337160503
87.6918769013137 1.11702132192658 0.243754036219437
87.7121005170047 1.32978728800783 0.265957457601566
87.7323241326958 1.70212772865002 0.300896514843521
87.7525477483869 1.06382983040626 0.237879581728048
87.7727713640779 1.38297877952814 0.271224453219182
87.792994979769 1.06382983040626 0.237879581728048
87.8132185954601 1.17021281344689 0.249490210115391
87.8334422111511 1.01063833888595 0.231856336193246
87.8536658268422 0.904255355845324 0.219314137922397
87.8738894425333 1.11702132192658 0.243754036219437
87.8941130582243 1.70212772865002 0.300896514843521
87.9143366739154 1.01063833888595 0.231856336193246
87.9345602896065 1.38297877952814 0.271224453219182
87.9547839052975 1.54255325408908 0.286444948174184
87.9750075209886 1.11702132192658 0.243754036219437
87.9952311366796 1.01063833888595 0.231856336193246
88.0154547523707 1.11702132192658 0.243754036219437
88.0356783680618 1.48936176256877 0.281462916854699
88.0559019837528 0.904255355845324 0.219314137922397
88.0761255994439 1.48936176256877 0.281462916854699
88.096349215135 1.2234043049672 0.255097431805139
88.116572830826 0.797872372804697 0.206009760818106
88.1367964465171 1.27659579648752 0.260584025764691
88.1570200622082 1.27659579648752 0.260584025764691
88.1772436778992 0.797872372804697 0.206009760818106
88.1974672935903 1.27659579648752 0.260584025764691
88.2176909092814 1.06382983040626 0.237879581728048
88.2379145249724 1.11702132192658 0.243754036219437
88.2581381406635 0.957446847365637 0.225672386132641
88.2783617563546 1.17021281344689 0.249490210115391
88.2985853720456 1.11702132192658 0.243754036219437
88.3188089877367 0.957446847365637 0.225672386132641
88.3390326034278 1.06382983040626 0.237879581728048
88.3592562191188 0.744680881284384 0.199024337160503
88.3794798348099 1.38297877952814 0.271224453219182
88.399703450501 1.17021281344689 0.249490210115391
88.419927066192 0.531914915203132 0.168206265345722
88.4401506818831 1.32978728800783 0.265957457601566
88.4603742975742 1.27659579648752 0.260584025764691
88.4805979132652 1.38297877952814 0.271224453219182
88.5008215289563 1.01063833888595 0.231856336193246
88.5210451446474 1.38297877952814 0.271224453219182
88.5412687603384 0.797872372804697 0.206009760818106
88.5614923760295 1.38297877952814 0.271224453219182
88.5817159917206 1.01063833888595 0.231856336193246
88.6019396074116 1.06382983040626 0.237879581728048
88.6221632231027 1.11702132192658 0.243754036219437
88.6423868387938 0.904255355845324 0.219314137922397
88.6626104544848 1.01063833888595 0.231856336193246
88.6828340701759 1.27659579648752 0.260584025764691
88.703057685867 1.01063833888595 0.231856336193246
88.723281301558 1.06382983040626 0.237879581728048
88.7435049172491 1.11702132192658 0.243754036219437
88.7637285329401 1.11702132192658 0.243754036219437
88.7839521486312 1.27659579648752 0.260584025764691
88.8041757643223 1.2234043049672 0.255097431805139
88.8243993800133 1.32978728800783 0.265957457601566
88.8446229957044 1.96808518625159 0.323551211550436
88.8648466113955 1.48936176256877 0.281462916854699
88.8850702270865 1.06382983040626 0.237879581728048
88.9052938427776 1.01063833888595 0.231856336193246
88.9255174584687 0.797872372804697 0.206009760818106
88.9457410741597 0.904255355845324 0.219314137922397
88.9659646898508 1.01063833888595 0.231856336193246
88.9861883055419 1.01063833888595 0.231856336193246
89.0064119212329 0.797872372804697 0.206009760818106
89.026635536924 1.32978728800783 0.265957457601566
89.0468591526151 1.01063833888595 0.231856336193246
89.0670827683061 0.904255355845324 0.219314137922397
89.0873063839972 1.01063833888595 0.231856336193246
89.1075299996883 0.957446847365637 0.225672386132641
89.1277536153793 1.01063833888595 0.231856336193246
89.1479772310704 1.59574474560939 0.291341797730203
89.1682008467615 1.06382983040626 0.237879581728048
89.1884244624525 1.11702132192658 0.243754036219437
89.2086480781436 1.17021281344689 0.249490210115391
89.2288716938347 1.27659579648752 0.260584025764691
89.2490953095257 0.638297898243758 0.184260731687103
89.2693189252168 1.32978728800783 0.265957457601566
89.2895425409079 1.17021281344689 0.249490210115391
89.3097661565989 0.851063864325011 0.212765966081253
89.32998977229 1.17021281344689 0.249490210115391
89.3502133879811 1.43617027104846 0.276391097530654
89.3704370036721 1.27659579648752 0.260584025764691
89.3906606193632 0.744680881284384 0.199024337160503
89.4108842350543 1.38297877952814 0.271224453219182
89.4311078507453 1.17021281344689 0.249490210115391
89.4513314664364 0.957446847365637 0.225672386132641
89.4715550821275 1.11702132192658 0.243754036219437
89.4917786978185 1.38297877952814 0.271224453219182
89.5120023135096 1.06382983040626 0.237879581728048
89.5322259292006 0.957446847365637 0.225672386132641
89.5524495448917 1.2234043049672 0.255097431805139
89.5726731605828 1.06382983040626 0.237879581728048
89.5928967762738 1.06382983040626 0.237879581728048
89.6131203919649 1.54255325408908 0.286444948174184
89.633344007656 1.2234043049672 0.255097431805139
89.653567623347 0.957446847365637 0.225672386132641
89.6737912390381 1.06382983040626 0.237879581728048
89.6940148547292 0.904255355845324 0.219314137922397
89.7142384704202 1.2234043049672 0.255097431805139
89.7344620861113 1.17021281344689 0.249490210115391
89.7546857018024 1.32978728800783 0.265957457601566
89.7749093174934 1.38297877952814 0.271224453219182
89.7951329331845 1.11702132192658 0.243754036219437
89.8153565488756 1.54255325408908 0.286444948174184
89.8355801645666 1.17021281344689 0.249490210115391
89.8558037802577 1.06382983040626 0.237879581728048
89.8760273959488 0.851063864325011 0.212765966081253
89.8962510116398 1.17021281344689 0.249490210115391
89.9164746273309 1.48936176256877 0.281462916854699
89.936698243022 1.06382983040626 0.237879581728048
89.956921858713 1.54255325408908 0.286444948174184
89.9771454744041 1.06382983040626 0.237879581728048
89.9973690900952 1.59574474560939 0.291341797730203
