# Supplementary material for: Gd3+-Doped Magnetic Nanoparticles for Biomedical Applications
Source: Hindawi journal article supplement (doi:10.1155/2018/1412563), 2018-08-02
Supplement: f1 [file 1412563.f1.zip › MNP-Gd0.xy]

'Id: "" Comment: "" Operator: "Lab Manager" Anode: "Cu" Scantype: "Coupled TwoTheta/Theta" TimePerStep: "NaN" 
4.99751234054565 2.01536643026005
5.00762414839119 1.92080378250591
5.01773595623672 2.00945626477541
5.02784776408225 2.21040189125296
5.03795957192779 1.83215130023641
5.04807137977332 2.05082742316785
5.05818318761885 1.86761229314421
5.06829499546438 1.83806146572104
5.07840680330992 1.90307328605201
5.08851861115545 1.87352245862884
5.09863041900098 1.97990543735225
5.10874222684652 2.22813238770686
5.11885403469205 2.09810874704492
5.12896584253758 1.83806146572104
5.13907765038311 1.97399527186761
5.14918945822865 1.82624113475177
5.15930126607418 2.07446808510638
5.16941307391971 1.98581560283688
5.17952488176525 2.04491725768322
5.18963668961078 2.02127659574468
5.19974849745631 2.02718676122931
5.20986030530185 2.01536643026005
5.21997211314738 1.92080378250591
5.23008392099291 1.93262411347518
5.24019572883844 1.93262411347518
5.25030753668398 2.08037825059102
5.26041934452951 1.82624113475177
5.27053115237504 2.12174940898345
5.28064296022058 1.92671394799054
5.29075476806611 1.89125295508274
5.30086657591164 1.95626477541371
5.31097838375717 1.96808510638298
5.32109019160271 1.89716312056738
5.33120199944824 1.94444444444444
5.34131380729377 1.91489361702128
5.35142561513931 1.91489361702128
5.36153742298484 1.725768321513
5.37164923083037 2.04491725768322
5.3817610386759 1.90307328605201
5.39187284652144 1.99763593380615
5.40198465436697 1.7080378250591
5.4120964622125 1.80260047281324
5.42220827005804 1.94444444444444
5.43232007790357 1.93262411347518
5.4424318857491 1.98581560283688
5.45254369359463 1.92080378250591
5.46265550144017 1.80851063829787
5.4727673092857 1.99763593380615
5.48287911713123 2.26950354609929
5.49299092497677 1.86761229314421
5.5031027328223 2.01536643026005
5.51321454066783 1.66666666666667
5.52332634851336 1.84397163120567
5.5334381563589 2.06855791962175
5.54354996420443 2.10401891252955
5.55366177204996 1.92671394799054
5.5637735798955 1.87943262411348
5.57388538774103 2.08037825059102
5.58399719558656 1.95035460992908
5.5941090034321 2.01536643026005
5.60422081127763 2.15130023640662
5.61433261912316 1.78486997635934
5.62444442696869 1.92080378250591
5.63455623481423 1.99172576832151
5.64466804265976 1.92671394799054
5.65477985050529 2.09810874704492
5.66489165835083 2.15130023640662
5.67500346619636 1.87943262411348
5.68511527404189 1.92080378250591
5.69522708188742 1.88534278959811
5.70533888973296 1.7434988179669
5.71545069757849 1.92671394799054
5.72556250542402 2.03900709219858
5.73567431326956 1.83215130023641
5.74578612111509 2.05082742316785
5.75589792896062 1.90898345153664
5.76600973680615 2.06264775413712
5.77612154465169 1.69621749408983
5.78623335249722 1.93262411347518
5.79634516034275 1.87352245862884
5.80645696818829 1.76713947990544
5.81656877603382 1.92080378250591
5.82668058387935 2.00354609929078
5.83679239172488 1.85579196217494
5.84690419957042 1.93262411347518
5.85701600741595 1.78486997635934
5.86712781526148 1.83806146572104
5.87723962310702 1.89125295508274
5.88735143095255 1.86170212765957
5.89746323879808 1.86761229314421
5.90757504664361 1.62529550827423
5.91768685448915 1.87352245862884
5.92779866233468 1.78486997635934
5.93791047018021 1.73758865248227
5.94802227802575 1.81442080378251
5.95813408587128 1.79078014184397
5.96824589371681 1.69621749408983
5.97835770156235 1.89716312056738
5.98846950940788 1.71985815602837
5.99858131725341 1.79669030732861
6.00869312509894 1.82624113475177
6.01880493294448 1.73758865248227
6.02891674079001 2.14539007092199
6.03902854863554 1.96217494089835
6.04914035648108 1.79078014184397
6.05925216432661 1.75531914893617
6.06936397217214 1.7434988179669
6.07947578001767 1.67848699763593
6.08958758786321 1.92080378250591
6.09969939570874 1.77304964539007
6.10981120355427 1.82033096926714
6.11992301139981 1.99172576832151
6.13003481924534 1.83215130023641
6.14014662709087 1.63120567375887
6.1502584349364 1.88534278959811
6.16037024278194 1.61347517730496
6.17048205062747 1.80851063829787
6.180593858473 1.83215130023641
6.19070566631854 1.95626477541371
6.20081747416407 1.82033096926714
6.2109292820096 1.7789598108747
6.22104108985513 1.85579196217494
6.23115289770067 1.96808510638298
6.2412647055462 1.66075650118203
6.25137651339173 1.80260047281324
6.26148832123727 1.80260047281324
6.2716001290828 1.7612293144208
6.28171193692833 1.86761229314421
6.29182374477386 1.82033096926714
6.3019355526194 2.05673758865248
6.31204736046493 1.7612293144208
6.32215916831046 1.56028368794326
6.332270976156 1.70212765957447
6.34238278400153 2.05082742316785
6.35249459184706 1.82624113475177
6.3626063996926 1.87943262411348
6.37271820753813 1.71985815602837
6.38283001538366 1.66075650118203
6.39294182322919 2.05673758865248
6.40305363107473 1.82624113475177
6.41316543892026 1.85579196217494
6.42327724676579 1.92671394799054
6.43338905461133 1.84397163120567
6.44350086245686 1.74940898345154
6.45361267030239 1.93853427895981
6.46372447814792 1.82033096926714
6.47383628599346 1.89716312056738
6.48394809383899 1.83215130023641
6.49405990168452 1.92080378250591
6.50417170953006 1.87943262411348
6.51428351737559 1.97990543735225
6.52439532522112 1.85579196217494
6.53450713306665 1.90898345153664
6.54461894091219 1.86761229314421
6.55473074875772 1.98581560283688
6.56484255660325 2.08628841607565
6.57495436444879 1.90898345153664
6.58506617229432 1.84397163120567
6.59517798013985 2.10401891252955
6.60528978798538 1.97990543735225
6.61540159583092 2.00945626477541
6.62551340367645 1.7612293144208
6.63562521152198 1.93262411347518
6.64573701936752 2.04491725768322
6.65584882721305 2.15130023640662
6.66596063505858 1.84397163120567
6.67607244290411 1.6903073286052
6.68618425074965 2.01536643026005
6.69629605859518 1.83806146572104
6.70640786644071 2.02718676122931
6.71651967428625 2.02718676122931
6.72663148213178 2.07446808510638
6.73674328997731 2.02127659574468
6.74685509782285 2.07446808510638
6.75696690566838 1.73758865248227
6.76707871351391 1.91489361702128
6.77719052135944 1.97990543735225
6.78730232920498 2.23995271867612
6.79741413705051 1.90898345153664
6.80752594489604 2.21040189125296
6.81763775274158 2.00354609929078
6.82774956058711 2.04491725768322
6.83786136843264 1.80260047281324
6.84797317627817 1.94444444444444
6.85808498412371 1.80260047281324
6.86819679196924 1.96217494089835
6.87830859981477 1.98581560283688
6.88842040766031 2.16312056737589
6.89853221550584 1.82624113475177
6.90864402335137 2.02127659574468
6.9187558311969 2.13947990543735
6.92886763904244 1.96808510638298
6.93897944688797 2.00945626477541
6.9490912547335 2.21040189125296
6.95920306257904 2.13356973995272
6.96931487042457 2.44089834515366
6.9794266782701 2.00945626477541
6.98953848611563 2.26950354609929
6.99965029396117 1.90307328605201
7.0097621018067 1.93262411347518
7.01987390965223 2.11583924349882
7.02998571749777 2.00354609929078
7.0400975253433 1.92671394799054
7.05020933318883 2.19267139479906
7.06032114103436 2.32269503546099
7.0704329488799 1.82624113475177
7.08054475672543 2.23404255319149
7.09065656457096 2.15721040189125
7.1007683724165 2.08628841607565
7.11088018026203 2.06264775413712
7.12099198810756 2.05082742316785
7.1311037959531 2.17494089834515
7.14121560379863 2.00945626477541
7.15132741164416 2.04491725768322
7.16143921948969 1.92671394799054
7.17155102733523 2.03900709219858
7.18166283518076 1.93262411347518
7.19177464302629 2.47044917257683
7.20188645087183 1.97990543735225
7.21199825871736 2.02127659574468
7.22211006656289 2.25768321513002
7.23222187440842 2.16903073286052
7.24233368225396 1.93853427895981
7.25244549009949 2.04491725768322
7.26255729794502 2.29314420803783
7.27266910579056 2.30496453900709
7.28278091363609 2.18085106382979
7.29289272148162 2.08037825059102
7.30300452932715 2.20449172576832
7.31311633717269 2.11583924349882
7.32322814501822 1.92080378250591
7.33333995286375 2.23404255319149
7.34345176070929 2.13356973995272
7.35356356855482 2.19858156028369
7.36367537640035 2.05673758865248
7.37378718424588 2.17494089834515
7.38389899209142 1.86170212765957
7.39401079993695 2.18085106382979
7.40412260778248 2.27541371158392
7.41423441562802 1.87943262411348
7.42434622347355 2.22222222222222
7.43445803131908 2.22222222222222
7.44456983916461 2.21631205673759
7.45468164701015 2.18085106382979
7.46479345485568 2.38179669030733
7.47490526270121 2.21040189125296
7.48501707054675 2.08037825059102
7.49512887839228 2.30496453900709
7.50524068623781 2.36406619385343
7.51535249408334 2.31087470449173
7.52546430192888 2.5886524822695
7.53557610977441 2.36997635933806
7.54568791761994 2.26359338061466
7.55579972546548 2.39952718676123
7.56591153331101 2.65366430260047
7.57602334115654 2.30496453900709
7.58613514900208 2.19858156028369
7.59624695684761 2.22813238770686
7.60635876469314 2.35224586288416
7.61647057253867 2.26950354609929
7.62658238038421 2.17494089834515
7.63669418822974 2.18676122931442
7.64680599607527 2.28132387706856
7.65691780392081 2.19858156028369
7.66702961176634 2.32269503546099
7.67714141961187 2.4822695035461
7.6872532274574 2.31678486997636
7.69736503530294 2.15130023640662
7.70747684314847 2.21631205673759
7.717588650994 2.38179669030733
7.72770045883954 2.27541371158392
7.73781226668507 2.49408983451537
7.7479240745306 2.4113475177305
7.75803588237613 2.34042553191489
7.76814769022167 2.4290780141844
7.7782594980672 2.36406619385343
7.78837130591273 2.20449172576832
7.79848311375827 2.18085106382979
7.8085949216038 2.29314420803783
7.81870672944933 2.13356973995272
7.82881853729486 2.38770685579196
7.8389303451404 2.36997635933806
7.84904215298593 2.22813238770686
7.85915396083146 2.25768321513002
7.869265768677 2.51182033096927
7.87937757652253 2.48817966903073
7.88948938436806 2.32269503546099
7.89960119221359 2.32269503546099
7.90971300005913 2.54728132387707
7.91982480790466 2.5531914893617
7.92993661575019 2.19267139479906
7.94004842359573 2.41725768321513
7.95016023144126 2.34633569739953
7.96027203928679 2.63593380614657
7.97038384713233 2.66548463356974
7.98049565497786 2.45271867612293
7.99060746282339 2.42316784869976
8.00071927066892 2.3581560283688
8.01083107851446 2.70685579196218
8.02094288635999 2.41725768321513
8.03105469420552 2.5177304964539
8.04116650205106 2.47635933806147
8.05127830989659 2.34633569739953
8.06139011774212 2.52364066193853
8.07150192558765 2.34042553191489
8.08161373343319 2.32860520094563
8.09172554127872 2.38179669030733
8.10183734912425 2.72458628841608
8.11194915696979 2.50591016548463
8.12206096481532 2.13356973995272
8.13217277266085 2.32860520094563
8.14228458050638 2.32269503546099
8.15239638835192 2.54137115839244
8.16250819619745 2.67139479905437
8.17262000404298 2.47635933806147
8.18273181188852 2.36406619385343
8.19284361973405 2.5
8.20295542757958 2.26950354609929
8.21306723542511 2.29905437352246
8.22317904327065 2.49408983451537
8.23329085111618 2.49408983451537
8.24340265896171 2.51182033096927
8.25351446680725 2.54728132387707
8.26362627465278 2.49408983451537
8.27373808249831 2.15130023640662
8.28384989034384 2.42316784869976
8.29396169818938 2.63002364066194
8.30407350603491 2.4468085106383
8.31418531388044 2.43498817966903
8.32429712172598 2.5177304964539
8.33440892957151 2.51182033096927
8.34452073741704 2.61229314420804
8.35463254526258 2.36406619385343
8.36474435310811 2.26950354609929
8.37485616095364 2.42316784869976
8.38496796879917 2.54728132387707
8.39507977664471 2.31087470449173
8.40519158449024 2.4290780141844
8.41530339233577 2.29905437352246
8.42541520018131 2.51182033096927
8.43552700802684 2.33451536643026
8.44563881587237 2.52364066193853
8.4557506237179 2.4822695035461
8.46586243156344 2.36997635933806
8.47597423940897 2.3936170212766
8.4860860472545 2.4113475177305
8.49619785510004 2.39952718676123
8.50630966294557 2.31678486997636
8.5164214707911 2.66548463356974
8.52653327863663 2.41725768321513
8.53664508648217 2.59456264775414
8.5467568943277 2.51182033096927
8.55686870217323 2.29905437352246
8.56698051001877 2.3936170212766
8.5770923178643 2.52955082742317
8.58720412570983 2.47635933806147
8.59731593355536 2.33451536643026
8.6074277414009 2.29905437352246
8.61753954924643 2.54728132387707
8.62765135709196 2.54137115839244
8.6377631649375 2.5177304964539
8.64787497278303 2.39952718676123
8.65798678062856 2.4822695035461
8.66809858847409 2.29314420803783
8.67821039631963 2.25177304964539
8.68832220416516 2.36997635933806
8.69843401201069 2.42316784869976
8.70854581985623 2.4822695035461
8.71865762770176 2.66548463356974
8.72876943554729 1.89125295508274
8.73888124339283 2.4113475177305
8.74899305123836 2.5177304964539
8.75910485908389 2.48817966903073
8.76921666692942 2.26950354609929
8.77932847477496 2.26359338061466
8.78944028262049 2.43498817966903
8.79955209046602 2.26359338061466
8.80966389831156 2.29314420803783
8.81977570615709 2.49408983451537
8.82988751400262 2.38179669030733
8.83999932184815 2.5
8.85011112969369 2.5709219858156
8.86022293753922 2.5354609929078
8.87033474538475 2.38179669030733
8.88044655323029 2.52364066193853
8.89055836107582 2.52364066193853
8.90067016892135 2.31678486997636
8.91078197676688 2.26950354609929
8.92089378461242 2.35224586288416
8.93100559245795 2.21040189125296
8.94111740030348 2.23404255319149
8.95122920814902 2.50591016548463
8.96134101599455 2.40543735224586
8.97145282384008 2.19858156028369
8.98156463168561 2.07446808510638
8.99167643953115 2.4290780141844
9.00178824737668 2.32860520094563
9.01190005522221 2.36406619385343
9.02201186306775 2.22222222222222
9.03212367091328 2.63593380614657
9.04223547875881 2.5
9.05234728660434 2.22813238770686
9.06245909444988 2.36406619385343
9.07257090229541 2.4645390070922
9.08268271014094 2.52955082742317
9.09279451798648 2.21040189125296
9.10290632583201 2.28132387706856
9.11301813367754 2.3758865248227
9.12312994152308 2.4468085106383
9.13324174936861 2.08037825059102
9.14335355721414 2.34042553191489
9.15346536505967 2.18085106382979
9.16357717290521 2.27541371158392
9.17368898075074 2.22222222222222
9.18380078859627 2.54137115839244
9.19391259644181 2.17494089834515
9.20402440428734 2.41725768321513
9.21413621213287 2.28132387706856
9.2242480199784 2.15721040189125
9.23435982782394 2.11583924349882
9.24447163566947 2.23995271867612
9.254583443515 2.38770685579196
9.26469525136054 2.45862884160757
9.27480705920607 2.33451536643026
9.2849188670516 2.06264775413712
9.29503067489713 2.24586288416076
9.30514248274267 2.20449172576832
9.3152542905882 2.25768321513002
9.32536609843373 2.25768321513002
9.33547790627927 2.13356973995272
9.3455897141248 2.10401891252955
9.35570152197033 2.08628841607565
9.36581332981586 2.05082742316785
9.3759251376614 2.30496453900709
9.38603694550693 2.05673758865248
9.39614875335246 2.14539007092199
9.406260561198 2.16312056737589
9.41637236904353 2.26359338061466
9.42648417688906 2.23995271867612
9.43659598473459 2.22813238770686
9.44670779258013 2.16903073286052
9.45681960042566 2.34042553191489
9.46693140827119 2.14539007092199
9.47704321611673 2.18085106382979
9.48715502396226 2.10401891252955
9.49726683180779 2.13356973995272
9.50737863965333 2.11583924349882
9.51749044749886 2.16903073286052
9.52760225534439 2.03309692671395
9.53771406318992 2.35224586288416
9.54782587103546 2.00945626477541
9.55793767888099 2.31678486997636
9.56804948672652 2.02127659574468
9.57816129457206 2.21040189125296
9.58827310241759 2.06855791962175
9.59838491026312 2.05673758865248
9.60849671810865 2.08628841607565
9.61860852595419 2.05673758865248
9.62872033379972 2.12765957446809
9.63883214164525 1.98581560283688
9.64894394949079 2.09810874704492
9.65905575733632 2.25177304964539
9.66916756518185 2.22813238770686
9.67927937302738 2.10992907801419
9.68939118087292 2.03309692671395
9.69950298871845 2.04491725768322
9.70961479656398 1.98581560283688
9.71972660440952 2.07446808510638
9.72983841225505 2.06264775413712
9.73995022010058 2.08037825059102
9.75006202794611 2.10992907801419
9.76017383579165 2.10401891252955
9.77028564363718 1.99172576832151
9.78039745148271 2.00945626477541
9.79050925932825 2.17494089834515
9.80062106717378 2.22813238770686
9.81073287501931 1.93262411347518
9.82084468286484 2.06855791962175
9.83095649071038 2.02127659574468
9.84106829855591 1.97399527186761
9.85118010640144 2.05673758865248
9.86129191424698 2.13356973995272
9.87140372209251 2.10992907801419
9.88151552993804 2.17494089834515
9.89162733778358 1.96217494089835
9.90173914562911 2.04491725768322
9.91185095347464 1.93853427895981
9.92196276132017 1.94444444444444
9.93207456916571 1.75531914893617
9.94218637701124 1.90307328605201
9.95229818485677 2.09219858156028
9.96240999270231 2.06855791962175
9.97252180054784 1.97399527186761
9.98263360839337 2.06264775413712
9.9927454162389 2.08628841607565
10.0028572240844 2.09219858156028
10.01296903193 1.92080378250591
10.0230808397755 2.03900709219858
10.033192647621 2.04491725768322
10.0433044554666 1.95626477541371
10.0534162633121 1.95035460992908
10.0635280711576 1.82033096926714
10.0736398790032 1.89125295508274
10.0837516868487 1.99763593380615
10.0938634946942 2.12765957446809
10.1039753025398 2.03309692671395
10.1140871103853 1.92671394799054
10.1241989182308 1.92080378250591
10.1343107260764 2.03309692671395
10.1444225339219 1.96808510638298
10.1545343417674 1.77304964539007
10.164646149613 2.00945626477541
10.1747579574585 1.91489361702128
10.184869765304 1.92080378250591
10.1949815731496 1.77304964539007
10.2050933809951 2.00354609929078
10.2152051888406 1.92671394799054
10.2253169966862 1.83215130023641
10.2354288045317 1.83215130023641
10.2455406123772 1.90898345153664
10.2556524202228 1.85579196217494
10.2657642280683 1.83806146572104
10.2758760359138 1.95626477541371
10.2859878437594 2.02127659574468
10.2960996516049 1.86170212765957
10.3062114594504 1.90307328605201
10.316323267296 1.83215130023641
10.3264350751415 1.92671394799054
10.336546882987 1.90898345153664
10.3466586908326 1.90898345153664
10.3567704986781 1.78486997635934
10.3668823065236 1.92671394799054
10.3769941143692 2.10992907801419
10.3871059222147 1.92080378250591
10.3972177300602 1.75531914893617
10.4073295379058 1.90307328605201
10.4174413457513 1.70212765957447
10.4275531535968 1.94444444444444
10.4376649614424 1.87352245862884
10.4477767692879 1.6903073286052
10.4578885771334 1.84988179669031
10.468000384979 1.89716312056738
10.4781121928245 1.6725768321513
10.48822400067 2.02127659574468
10.4983358085155 1.96217494089835
10.5084476163611 1.71394799054374
10.5185594242066 1.66666666666667
10.5286712320521 1.78486997635934
10.5387830398977 1.93853427895981
10.5488948477432 1.87943262411348
10.5590066555887 1.7612293144208
10.5691184634343 1.79669030732861
10.5792302712798 1.7080378250591
10.5893420791253 1.92080378250591
10.5994538869709 1.80851063829787
10.6095656948164 1.74940898345154
10.6196775026619 1.6903073286052
10.6297893105075 1.80260047281324
10.639901118353 1.88534278959811
10.6500129261985 1.83806146572104
10.6601247340441 1.48936170212766
10.6702365418896 1.6903073286052
10.6803483497351 1.89716312056738
10.6904601575807 1.90898345153664
10.7005719654262 1.79669030732861
10.7106837732717 1.64302600472813
10.7207955811173 1.6725768321513
10.7309073889628 1.82033096926714
10.7410191968083 1.80260047281324
10.7511310046539 1.98581560283688
10.7612428124994 1.7080378250591
10.7713546203449 1.73758865248227
10.7814664281905 1.73758865248227
10.791578236036 1.7080378250591
10.8016900438815 1.79669030732861
10.8118018517271 1.69621749408983
10.8219136595726 1.79669030732861
10.8320254674181 1.64302600472813
10.8421372752637 1.79078014184397
10.8522490831092 1.66666666666667
10.8623608909547 1.725768321513
10.8724726988003 1.73758865248227
10.8825845066458 1.6371158392435
10.8926963144913 1.79669030732861
10.9028081223369 1.77304964539007
10.9129199301824 1.6725768321513
10.9230317380279 1.63120567375887
10.9331435458735 1.6548463356974
10.943255353719 1.51891252955083
10.9533671615645 1.5661938534279
10.9634789694101 1.74940898345154
10.9735907772556 1.7612293144208
10.9837025851011 1.6725768321513
10.9938143929467 1.60756501182033
11.0039262007922 1.76713947990544
11.0140380086377 1.7789598108747
11.0241498164833 1.55437352245863
11.0342616243288 1.54255319148936
11.0443734321743 1.50709219858156
11.0544852400199 1.7080378250591
11.0645970478654 1.7434988179669
11.0747088557109 1.64302600472813
11.0848206635565 1.64893617021277
11.094932471402 1.71985815602837
11.1050442792475 1.79669030732861
11.1151560870931 1.66075650118203
11.1252678949386 1.75531914893617
11.1353797027841 1.5661938534279
11.1454915106297 1.55437352245863
11.1556033184752 1.55437352245863
11.1657151263207 1.78486997635934
11.1758269341663 1.53664302600473
11.1859387420118 1.58983451536643
11.1960505498573 1.60756501182033
11.2061623577029 1.66075650118203
11.2162741655484 1.725768321513
11.2263859733939 1.57801418439716
11.2364977812395 1.70212765957447
11.246609589085 1.73167848699764
11.2567213969305 1.57210401891253
11.266833204776 1.68439716312057
11.2769450126216 1.5661938534279
11.2870568204671 1.55437352245863
11.2971686283126 1.548463356974
11.3072804361582 1.73167848699764
11.3173922440037 1.48345153664303
11.3275040518492 1.62529550827423
11.3376158596948 1.6371158392435
11.3477276675403 1.50118203309693
11.3578394753858 1.7612293144208
11.3679512832314 1.86170212765957
11.3780630910769 1.41252955082742
11.3881748989224 1.56028368794326
11.398286706768 1.44799054373522
11.4083985146135 1.548463356974
11.418510322459 1.51891252955083
11.4286221303046 1.58983451536643
11.4387339381501 1.48345153664303
11.4488457459956 1.73167848699764
11.4589575538412 1.63120567375887
11.4690693616867 1.6016548463357
11.4791811695322 1.58983451536643
11.4892929773778 1.51891252955083
11.4994047852233 1.42434988179669
11.5095165930688 1.45981087470449
11.5196284009144 1.49527186761229
11.5297402087599 1.64893617021277
11.5398520166054 1.58983451536643
11.549963824451 1.73167848699764
11.5600756322965 1.54255319148936
11.570187440142 1.39479905437352
11.5802992479876 1.6371158392435
11.5904110558331 1.77304964539007
11.6005228636786 1.6548463356974
11.6106346715242 1.58983451536643
11.6207464793697 1.68439716312057
11.6308582872152 1.44799054373522
11.6409700950608 1.69621749408983
11.6510819029063 1.725768321513
11.6611937107518 1.37706855791962
11.6713055185974 1.51300236406619
11.6814173264429 1.50118203309693
11.6915291342884 1.66075650118203
11.701640942134 1.64893617021277
11.7117527499795 1.73758865248227
11.721864557825 1.53073286052009
11.7319763656706 1.63120567375887
11.7420881735161 1.64893617021277
11.7521999813616 1.49527186761229
11.7623117892072 1.5839243498818
11.7724235970527 1.58983451536643
11.7825354048982 1.67848699763593
11.7926472127438 1.63120567375887
11.8027590205893 1.44208037825059
11.8128708284348 1.62529550827423
11.8229826362804 1.6016548463357
11.8330944441259 1.51891252955083
11.8432062519714 1.46572104018913
11.853318059817 1.55437352245863
11.8634298676625 1.49527186761229
11.873541675508 1.64893617021277
11.8836534833536 1.44799054373522
11.8937652911991 1.50118203309693
11.9038770990446 1.66666666666667
11.9139889068902 1.44208037825059
11.9241007147357 1.56028368794326
11.9342125225812 1.48345153664303
11.9443243304268 1.41252955082742
11.9544361382723 1.71985815602837
11.9645479461178 1.60756501182033
11.9746597539634 1.66075650118203
11.9847715618089 1.5839243498818
11.9948833696544 1.52482269503546
12.0049951774999 1.61347517730496
12.0151069853455 1.5661938534279
12.025218793191 1.5839243498818
12.0353306010365 1.56028368794326
12.0454424088821 1.42434988179669
12.0555542167276 1.46572104018913
12.0656660245731 1.34160756501182
12.0757778324187 1.47163120567376
12.0858896402642 1.44208037825059
12.0960014481097 1.32387706855792
12.1061132559553 1.44208037825059
12.1162250638008 1.51300236406619
12.1263368716463 1.52482269503546
12.1364486794919 1.6193853427896
12.1465604873374 1.43026004728132
12.1566722951829 1.66075650118203
12.1667841030285 1.64893617021277
12.176895910874 1.47163120567376
12.1870077187195 1.61347517730496
12.1971195265651 1.7612293144208
12.2072313344106 1.7789598108747
12.2173431422561 1.50709219858156
12.2274549501017 1.46572104018913
12.2375667579472 1.39479905437352
12.2476785657927 1.52482269503546
12.2577903736383 1.64302600472813
12.2679021814838 1.63120567375887
12.2780139893293 1.5839243498818
12.2881257971749 1.59574468085106
12.2982376050204 1.49527186761229
12.3083494128659 1.548463356974
12.3184612207115 1.53073286052009
12.328573028557 1.56028368794326
12.3386848364025 1.5839243498818
12.3487966442481 1.61347517730496
12.3589084520936 1.74940898345154
12.3690202599391 1.56028368794326
12.3791320677847 1.79669030732861
12.3892438756302 1.57210401891253
12.3993556834757 1.52482269503546
12.4094674913213 1.48345153664303
12.4195792991668 1.63120567375887
12.4296911070123 1.38888888888889
12.4398029148579 1.5661938534279
12.4499147227034 1.53664302600473
12.4600265305489 1.5661938534279
12.4701383383945 1.40070921985816
12.48025014624 1.38888888888889
12.4903619540855 1.61347517730496
12.5004737619311 1.56028368794326
12.5105855697766 1.53664302600473
12.5206973776221 1.54255319148936
12.5308091854677 1.44208037825059
12.5409209933132 1.41843971631206
12.5510328011587 1.48345153664303
12.5611446090043 1.40070921985816
12.5712564168498 1.37706855791962
12.5813682246953 1.52482269503546
12.5914800325409 1.53073286052009
12.6015918403864 1.66075650118203
12.6117036482319 1.53664302600473
12.6218154560775 1.7080378250591
12.631927263923 1.44208037825059
12.6420390717685 1.31796690307329
12.6521508796141 1.44799054373522
12.6622626874596 1.68439716312057
12.6723744953051 1.66075650118203
12.6824863031507 1.64302600472813
12.6925981109962 1.54255319148936
12.7027099188417 1.35342789598109
12.7128217266873 1.6548463356974
12.7229335345328 1.53073286052009
12.7330453423783 1.57210401891253
12.7431571502239 1.32387706855792
12.7532689580694 1.49527186761229
12.7633807659149 1.50118203309693
12.7734925737604 1.63120567375887
12.783604381606 1.36524822695035
12.7937161894515 1.50118203309693
12.803827997297 1.41843971631206
12.8139398051426 1.47163120567376
12.8240516129881 1.6016548463357
12.8341634208336 1.53664302600473
12.8442752286792 1.45390070921986
12.8543870365247 1.42434988179669
12.8644988443702 1.37115839243499
12.8746106522158 1.66666666666667
12.8847224600613 1.44799054373522
12.8948342679068 1.548463356974
12.9049460757524 1.45390070921986
12.9150578835979 1.36524822695035
12.9251696914434 1.39479905437352
12.935281499289 1.53073286052009
12.9453933071345 1.32978723404255
12.95550511498 1.43026004728132
12.9656169228256 1.50118203309693
12.9757287306711 1.31796690307329
12.9858405385166 1.6725768321513
12.9959523463622 1.50118203309693
13.0060641542077 1.5839243498818
13.0161759620532 1.26477541371158
13.0262877698988 1.43617021276596
13.0363995777443 1.55437352245863
13.0465113855898 1.59574468085106
13.0566231934354 1.37115839243499
13.0667350012809 1.44799054373522
13.0768468091264 1.53664302600473
13.086958616972 1.47754137115839
13.0970704248175 1.47754137115839
13.107182232663 1.44799054373522
13.1172940405086 1.33569739952719
13.1274058483541 1.6193853427896
13.1375176561996 1.53664302600473
13.1476294640452 1.55437352245863
13.1577412718907 1.40070921985816
13.1678530797362 1.53664302600473
13.1779648875818 1.46572104018913
13.1880766954273 1.46572104018913
13.1981885032728 1.43026004728132
13.2083003111184 1.6016548463357
13.2184121189639 1.50709219858156
13.2285239268094 1.66075650118203
13.238635734655 1.6548463356974
13.2487475425005 1.5661938534279
13.258859350346 1.57210401891253
13.2689711581916 1.6903073286052
13.2790829660371 1.48345153664303
13.2891947738826 1.38888888888889
13.2993065817282 1.46572104018913
13.3094183895737 1.58983451536643
13.3195301974192 1.44208037825059
13.3296420052648 1.42434988179669
13.3397538131103 1.6903073286052
13.3498656209558 1.51300236406619
13.3599774288014 1.57210401891253
13.3700892366469 1.69621749408983
13.3802010444924 1.41843971631206
13.390312852338 1.5839243498818
13.4004246601835 1.44799054373522
13.410536468029 1.39479905437352
13.4206482758746 1.50118203309693
13.4307600837201 1.51891252955083
13.4408718915656 1.48345153664303
13.4509836994112 1.53664302600473
13.4610955072567 1.39479905437352
13.4712073151022 1.63120567375887
13.4813191229478 1.60756501182033
13.4914309307933 1.47163120567376
13.5015427386388 1.45981087470449
13.5116545464844 1.6725768321513
13.5217663543299 1.47163120567376
13.5318781621754 1.47754137115839
13.5419899700209 1.64302600472813
13.5521017778665 1.55437352245863
13.562213585712 1.51300236406619
13.5723253935575 1.47754137115839
13.5824372014031 1.44799054373522
13.5925490092486 1.37115839243499
13.6026608170941 1.59574468085106
13.6127726249397 1.51891252955083
13.6228844327852 1.53664302600473
13.6329962406307 1.66075650118203
13.6431080484763 1.34160756501182
13.6532198563218 1.548463356974
13.6633316641673 1.43617021276596
13.6734434720129 1.44208037825059
13.6835552798584 1.71985815602837
13.6936670877039 1.44799054373522
13.7037788955495 1.34751773049645
13.713890703395 1.44208037825059
13.7240025112405 1.33569739952719
13.7341143190861 1.43617021276596
13.7442261269316 1.66666666666667
13.7543379347771 1.66075650118203
13.7644497426227 1.57210401891253
13.7745615504682 1.31796690307329
13.7846733583137 1.66075650118203
13.7947851661593 1.45390070921986
13.8048969740048 1.50118203309693
13.8150087818503 1.55437352245863
13.8251205896959 1.50709219858156
13.8352323975414 1.41252955082742
13.8453442053869 1.40661938534279
13.8554560132325 1.44208037825059
13.865567821078 1.55437352245863
13.8756796289235 1.43026004728132
13.8857914367691 1.61347517730496
13.8959032446146 1.5661938534279
13.9060150524601 1.43617021276596
13.9161268603057 1.50118203309693
13.9262386681512 1.47163120567376
13.9363504759967 1.38297872340426
13.9464622838423 1.45390070921986
13.9565740916878 1.45390070921986
13.9666858995333 1.38297872340426
13.9767977073789 1.19385342789598
13.9869095152244 1.48345153664303
13.9970213230699 1.53664302600473
14.0071331309155 1.52482269503546
14.017244938761 1.51891252955083
14.0273567466065 1.44799054373522
14.0374685544521 1.30614657210402
14.0475803622976 1.73167848699764
14.0576921701431 1.32978723404255
14.0678039779887 1.43026004728132
14.0779157858342 1.56028368794326
14.0880275936797 1.57210401891253
14.0981394015253 1.51300236406619
14.1082512093708 1.44208037825059
14.1183630172163 1.41843971631206
14.1284748250619 1.32387706855792
14.1385866329074 1.32978723404255
14.1486984407529 1.41252955082742
14.1588102485985 1.53073286052009
14.168922056444 1.46572104018913
14.1790338642895 1.35342789598109
14.1891456721351 1.53664302600473
14.1992574799806 1.57801418439716
14.2093692878261 1.47754137115839
14.2194810956717 1.50709219858156
14.2295929035172 1.59574468085106
14.2397047113627 1.66666666666667
14.2498165192083 1.57210401891253
14.2599283270538 1.37706855791962
14.2700401348993 1.75531914893617
14.2801519427449 1.41252955082742
14.2902637505904 1.40070921985816
14.3003755584359 1.40070921985816
14.3104873662814 1.31796690307329
14.320599174127 1.48936170212766
14.3307109819725 1.44208037825059
14.340822789818 1.47163120567376
14.3509345976636 1.42434988179669
14.3610464055091 1.38888888888889
14.3711582133546 1.34160756501182
14.3812700212002 1.45981087470449
14.3913818290457 1.39479905437352
14.4014936368912 1.48936170212766
14.4116054447368 1.54255319148936
14.4217172525823 1.51891252955083
14.4318290604278 1.50118203309693
14.4419408682734 1.35933806146572
14.4520526761189 1.41843971631206
14.4621644839644 1.47163120567376
14.47227629181 1.32978723404255
14.4823880996555 1.50118203309693
14.492499907501 1.69621749408983
14.5026117153466 1.6548463356974
14.5127235231921 1.53664302600473
14.5228353310376 1.48936170212766
14.5329471388832 1.51891252955083
14.5430589467287 1.37115839243499
14.5531707545742 1.41843971631206
14.5632825624198 1.49527186761229
14.5733943702653 1.5661938534279
14.5835061781108 1.6725768321513
14.5936179859564 1.41843971631206
14.6037297938019 1.47163120567376
14.6138416016474 1.63120567375887
14.623953409493 1.48936170212766
14.6340652173385 1.5661938534279
14.644177025184 1.52482269503546
14.6542888330296 1.64893617021277
14.6644006408751 1.53664302600473
14.6745124487206 1.54255319148936
14.6846242565662 1.50118203309693
14.6947360644117 1.46572104018913
14.7048478722572 1.53664302600473
14.7149596801028 1.48345153664303
14.7250714879483 1.36524822695035
14.7351832957938 1.57210401891253
14.7452951036394 1.49527186761229
14.7554069114849 1.51891252955083
14.7655187193304 1.37706855791962
14.775630527176 1.59574468085106
14.7857423350215 1.34751773049645
14.795854142867 1.42434988179669
14.8059659507126 1.34160756501182
14.8160777585581 1.5839243498818
14.8261895664036 1.71394799054374
14.8363013742492 1.57210401891253
14.8464131820947 1.53664302600473
14.8565249899402 1.50709219858156
14.8666367977858 1.50709219858156
14.8767486056313 1.41252955082742
14.8868604134768 1.5839243498818
14.8969722213224 1.25886524822695
14.9070840291679 1.46572104018913
14.9171958370134 1.44208037825059
14.927307644859 1.45390070921986
14.9374194527045 1.54255319148936
14.94753126055 1.51891252955083
14.9576430683956 1.48345153664303
14.9677548762411 1.47163120567376
14.9778666840866 1.43617021276596
14.9879784919322 1.42434988179669
14.9980902997777 1.61347517730496
15.0082021076232 1.57801418439716
15.0183139154688 1.6016548463357
15.0284257233143 1.36524822695035
15.0385375311598 1.548463356974
15.0486493390054 1.46572104018913
15.0587611468509 1.31796690307329
15.0688729546964 1.27068557919622
15.0789847625419 1.62529550827423
15.0890965703875 1.43026004728132
15.099208378233 1.41252955082742
15.1093201860785 1.40661938534279
15.1194319939241 1.35933806146572
15.1295438017696 1.50118203309693
15.1396556096151 1.40070921985816
15.1497674174607 1.32978723404255
15.1598792253062 1.45390070921986
15.1699910331517 1.51300236406619
15.1801028409973 1.50118203309693
15.1902146488428 1.52482269503546
15.2003264566883 1.5661938534279
15.2104382645339 1.62529550827423
15.2205500723794 1.54255319148936
15.2306618802249 1.51891252955083
15.2407736880705 1.46572104018913
15.250885495916 1.40070921985816
15.2609973037615 1.43617021276596
15.2711091116071 1.51891252955083
15.2812209194526 1.47754137115839
15.2913327272981 1.31205673758865
15.3014445351437 1.49527186761229
15.3115563429892 1.23522458628842
15.3216681508347 1.46572104018913
15.3317799586803 1.44799054373522
15.3418917665258 1.22931442080378
15.3520035743713 1.44799054373522
15.3621153822169 1.30023640661939
15.3722271900624 1.50118203309693
15.3823389979079 1.50709219858156
15.3924508057535 1.49527186761229
15.402562613599 1.53073286052009
15.4126744214445 1.35342789598109
15.4227862292901 1.45981087470449
15.4328980371356 1.548463356974
15.4430098449811 1.60756501182033
15.4531216528267 1.50118203309693
15.4632334606722 1.27068557919622
15.4733452685177 1.30614657210402
15.4834570763633 1.40661938534279
15.4935688842088 1.45390070921986
15.5036806920543 1.36524822695035
15.5137924998999 1.32978723404255
15.5239043077454 1.45390070921986
15.5340161155909 1.40661938534279
15.5441279234365 1.35342789598109
15.554239731282 1.6016548463357
15.5643515391275 1.32978723404255
15.5744633469731 1.51891252955083
15.5845751548186 1.34751773049645
15.5946869626641 1.47754137115839
15.6047987705097 1.45981087470449
15.6149105783552 1.32978723404255
15.6250223862007 1.45981087470449
15.6351341940463 1.48936170212766
15.6452460018918 1.51891252955083
15.6553578097373 1.41843971631206
15.6654696175829 1.44799054373522
15.6755814254284 1.35342789598109
15.6856932332739 1.43026004728132
15.6958050411195 1.39479905437352
15.705916848965 1.26477541371158
15.7160286568105 1.5839243498818
15.7261404646561 1.35933806146572
15.7362522725016 1.60756501182033
15.7463640803471 1.41252955082742
15.7564758881927 1.38297872340426
15.7665876960382 1.58983451536643
15.7766995038837 1.56028368794326
15.7868113117293 1.45390070921986
15.7969231195748 1.24704491725768
15.8070349274203 1.40661938534279
15.8171467352659 1.42434988179669
15.8272585431114 1.41843971631206
15.8373703509569 1.34160756501182
15.8474821588024 1.54255319148936
15.857593966648 1.51300236406619
15.8677057744935 1.32978723404255
15.877817582339 1.28250591016548
15.8879293901846 1.38888888888889
15.8980411980301 1.40070921985816
15.9081530058756 1.48936170212766
15.9182648137212 1.37115839243499
15.9283766215667 1.35933806146572
15.9384884294122 1.45390070921986
15.9486002372578 1.31796690307329
15.9587120451033 1.20567375886525
15.9688238529488 1.31796690307329
15.9789356607944 1.54255319148936
15.9890474686399 1.44799054373522
15.9991592764854 1.59574468085106
16.009271084331 1.35933806146572
16.0193828921765 1.35342789598109
16.029494700022 1.45390070921986
16.0396065078676 1.34751773049645
16.0497183157131 1.30614657210402
16.0598301235586 1.30614657210402
16.0699419314042 1.51891252955083
16.0800537392497 1.47163120567376
16.0901655470952 1.40661938534279
16.1002773549408 1.6193853427896
16.1103891627863 1.54255319148936
16.1205009706318 1.32387706855792
16.1306127784774 1.17612293144208
16.1407245863229 1.45390070921986
16.1508363941684 1.49527186761229
16.160948202014 1.44208037825059
16.1710600098595 1.13475177304965
16.181171817705 1.53073286052009
16.1912836255506 1.18203309692671
16.2013954333961 1.46572104018913
16.2115072412416 1.51891252955083
16.2216190490872 1.48936170212766
16.2317308569327 1.53073286052009
16.2418426647782 1.30023640661939
16.2519544726238 1.43026004728132
16.2620662804693 1.35342789598109
16.2721780883148 1.27659574468085
16.2822898961604 1.51300236406619
16.2924017040059 1.42434988179669
16.3025135118514 1.44208037825059
16.312625319697 1.43026004728132
16.3227371275425 1.37706855791962
16.332848935388 1.29432624113475
16.3429607432336 1.43026004728132
16.3530725510791 1.30023640661939
16.3631843589246 1.45981087470449
16.3732961667702 1.47754137115839
16.3834079746157 1.23522458628842
16.3935197824612 1.30023640661939
16.4036315903068 1.27659574468085
16.4137433981523 1.48936170212766
16.4238552059978 1.42434988179669
16.4339670138434 1.23522458628842
16.4440788216889 1.34751773049645
16.4541906295344 1.50118203309693
16.46430243738 1.46572104018913
16.4744142452255 1.43026004728132
16.484526053071 1.25886524822695
16.4946378609166 1.34160756501182
16.5047496687621 1.39479905437352
16.5148614766076 1.42434988179669
16.5249732844532 1.31796690307329
16.5350850922987 1.41252955082742
16.5451969001442 1.46572104018913
16.5553087079898 1.31205673758865
16.5654205158353 1.41843971631206
16.5755323236808 1.48936170212766
16.5856441315264 1.17021276595745
16.5957559393719 1.13475177304965
16.6058677472174 1.5839243498818
16.615979555063 1.25295508274232
16.6260913629085 1.34160756501182
16.636203170754 1.31205673758865
16.6463149785995 1.15839243498818
16.6564267864451 1.20567375886525
16.6665385942906 1.29432624113475
16.6766504021361 1.44208037825059
16.6867622099817 1.24704491725768
16.6968740178272 1.548463356974
16.7069858256727 1.40661938534279
16.7170976335183 1.48936170212766
16.7272094413638 1.40070921985816
16.7373212492093 1.37706855791962
16.7474330570549 1.53664302600473
16.7575448649004 1.18203309692671
16.7676566727459 1.34751773049645
16.7777684805915 1.18794326241135
16.787880288437 1.27068557919622
16.7979920962825 1.31796690307329
16.8081039041281 1.6548463356974
16.8182157119736 1.21158392434988
16.8283275198191 1.42434988179669
16.8384393276647 1.26477541371158
16.8485511355102 1.39479905437352
16.8586629433557 1.09338061465721
16.8687747512013 1.38297872340426
16.8788865590468 1.25886524822695
16.8889983668923 1.27659574468085
16.8991101747379 1.43617021276596
16.9092219825834 1.29432624113475
16.9193337904289 1.40661938534279
16.9294455982745 1.31796690307329
16.93955740612 1.45390070921986
16.9496692139655 1.38297872340426
16.9597810218111 1.32387706855792
16.9698928296566 1.50118203309693
16.9800046375021 1.29432624113475
16.9901164453477 1.57210401891253
17.0002282531932 1.18794326241135
17.0103400610387 1.24704491725768
17.0204518688843 1.25295508274232
17.0305636767298 1.17612293144208
17.0406754845753 1.28250591016548
17.0507872924209 1.30614657210402
17.0608991002664 1.05200945626478
17.0710109081119 1.43617021276596
17.0811227159575 1.27068557919622
17.091234523803 1.43617021276596
17.1013463316485 1.26477541371158
17.1114581394941 1.25295508274232
17.1215699473396 1.40661938534279
17.1316817551851 1.36524822695035
17.1417935630307 1.40070921985816
17.1519053708762 1.32978723404255
17.1620171787217 1.38297872340426
17.1721289865673 1.32978723404255
17.1822407944128 1.35342789598109
17.1923526022583 1.50709219858156
17.2024644101039 1.24113475177305
17.2125762179494 1.53073286052009
17.2226880257949 1.47163120567376
17.2327998336405 1.50118203309693
17.242911641486 1.40661938534279
17.2530234493315 1.38888888888889
17.2631352571771 1.31796690307329
17.2732470650226 1.44208037825059
17.2833588728681 1.27659574468085
17.2934706807137 1.45390070921986
17.3035824885592 1.26477541371158
17.3136942964047 1.5661938534279
17.3238061042503 1.25295508274232
17.3339179120958 1.16430260047281
17.3440297199413 1.58983451536643
17.3541415277869 1.39479905437352
17.3642533356324 1.38297872340426
17.3743651434779 1.18203309692671
17.3844769513235 1.37706855791962
17.394588759169 1.32387706855792
17.4047005670145 1.45390070921986
17.41481237486 1.28841607565012
17.4249241827056 1.40070921985816
17.4350359905511 1.32978723404255
17.4451477983966 1.43026004728132
17.4552596062422 1.45390070921986
17.4653714140877 1.54255319148936
17.4754832219332 1.5839243498818
17.4855950297788 1.41843971631206
17.4957068376243 1.41252955082742
17.5058186454698 1.39479905437352
17.5159304533154 1.48936170212766
17.5260422611609 1.19385342789598
17.5361540690064 1.34751773049645
17.546265876852 1.27659574468085
17.5563776846975 1.37706855791962
17.566489492543 1.30023640661939
17.5766013003886 1.35933806146572
17.5867131082341 1.26477541371158
17.5968249160796 1.36524822695035
17.6069367239252 1.35342789598109
17.6170485317707 1.44799054373522
17.6271603396162 1.46572104018913
17.6372721474618 1.35342789598109
17.6473839553073 1.50709219858156
17.6574957631528 1.40070921985816
17.6676075709984 1.21749408983452
17.6777193788439 1.47754137115839
17.6878311866894 1.35342789598109
17.697942994535 1.54255319148936
17.7080548023805 1.63120567375887
17.718166610226 1.37115839243499
17.7282784180716 1.47754137115839
17.7383902259171 1.45981087470449
17.7485020337626 1.30023640661939
17.7586138416082 1.71985815602837
17.7687256494537 1.40661938534279
17.7788374572992 1.52482269503546
17.7889492651448 1.47163120567376
17.7990610729903 1.38888888888889
17.8091728808358 1.64302600472813
17.8192846886814 1.57210401891253
17.8293964965269 1.19976359338061
17.8395083043724 1.5661938534279
17.849620112218 1.50118203309693
17.8597319200635 1.66075650118203
17.869843727909 1.6016548463357
17.8799555357546 1.57210401891253
17.8900673436001 1.50709219858156
17.9001791514456 1.6193853427896
17.9102909592912 1.60756501182033
17.9204027671367 1.6016548463357
17.9305145749822 1.64893617021277
17.9406263828278 1.45981087470449
17.9507381906733 1.47754137115839
17.9608499985188 1.50709219858156
17.9709618063644 1.55437352245863
17.9810736142099 1.5839243498818
17.9911854220554 1.58983451536643
18.001297229901 1.51891252955083
18.0114090377465 1.57801418439716
18.021520845592 1.725768321513
18.0316326534376 1.57210401891253
18.0417444612831 1.57801418439716
18.0518562691286 1.51891252955083
18.0619680769742 1.48345153664303
18.0720798848197 1.53073286052009
18.0821916926652 1.57210401891253
18.0923035005108 1.51300236406619
18.1024153083563 1.50709219858156
18.1125271162018 1.6903073286052
18.1226389240474 1.548463356974
18.1327507318929 1.28841607565012
18.1428625397384 1.63120567375887
18.152974347584 1.48345153664303
18.1630861554295 1.53664302600473
18.173197963275 1.64893617021277
18.1833097711205 1.57801418439716
18.1934215789661 1.5839243498818
18.2035333868116 1.49527186761229
18.2136451946571 1.81442080378251
18.2237570025027 1.57801418439716
18.2338688103482 1.5661938534279
18.2439806181937 1.77304964539007
18.2540924260393 1.79078014184397
18.2642042338848 1.73167848699764
18.2743160417303 1.68439716312057
18.2844278495759 1.58983451536643
18.2945396574214 1.61347517730496
18.3046514652669 1.63120567375887
18.3147632731125 1.6903073286052
18.324875080958 1.58983451536643
18.3349868888035 1.7612293144208
18.3450986966491 1.44799054373522
18.3552105044946 1.61347517730496
18.3653223123401 1.77304964539007
18.3754341201857 1.548463356974
18.3855459280312 1.64893617021277
18.3956577358767 1.57801418439716
18.4057695437223 1.76713947990544
18.4158813515678 1.68439716312057
18.4259931594133 1.70212765957447
18.4361049672589 1.71985815602837
18.4462167751044 1.35933806146572
18.4563285829499 1.53664302600473
18.4664403907955 1.62529550827423
18.476552198641 1.45390070921986
18.4866640064865 1.59574468085106
18.4967758143321 1.59574468085106
18.5068876221776 1.61347517730496
18.5169994300231 1.39479905437352
18.5271112378687 1.61347517730496
18.5372230457142 1.55437352245863
18.5473348535597 1.52482269503546
18.5574466614053 1.5839243498818
18.5675584692508 1.64893617021277
18.5776702770963 1.67848699763593
18.5877820849419 1.53664302600473
18.5978938927874 1.5839243498818
18.6080057006329 1.61347517730496
18.6181175084785 1.45981087470449
18.628229316324 1.68439716312057
18.6383411241695 1.51891252955083
18.6484529320151 1.61347517730496
18.6585647398606 1.40661938534279
18.6686765477061 1.75531914893617
18.6787883555517 1.38888888888889
18.6889001633972 1.57210401891253
18.6990119712427 1.63120567375887
18.7091237790883 1.32387706855792
18.7192355869338 1.46572104018913
18.7293473947793 1.6371158392435
18.7394592026249 1.45981087470449
18.7495710104704 1.53073286052009
18.7596828183159 1.5661938534279
18.7697946261615 1.45981087470449
18.779906434007 1.6371158392435
18.7900182418525 1.43026004728132
18.8001300496981 1.35342789598109
18.8102418575436 1.66666666666667
18.8203536653891 1.49527186761229
18.8304654732347 1.41843971631206
18.8405772810802 1.56028368794326
18.8506890889257 1.67848699763593
18.8608008967713 1.53073286052009
18.8709127046168 1.37706855791962
18.8810245124623 1.38297872340426
18.8911363203079 1.60756501182033
18.9012481281534 1.35933806146572
18.9113599359989 1.39479905437352
18.9214717438445 1.48345153664303
18.93158355169 1.32978723404255
18.9416953595355 1.40661938534279
18.951807167381 1.39479905437352
18.9619189752266 1.55437352245863
18.9720307830721 1.51891252955083
18.9821425909176 1.38888888888889
18.9922543987632 1.36524822695035
19.0023662066087 1.57210401891253
19.0124780144542 1.35933806146572
19.0225898222998 1.43026004728132
19.0327016301453 1.38297872340426
19.0428134379908 1.32978723404255
19.0529252458364 1.46572104018913
19.0630370536819 1.47754137115839
19.0731488615274 1.38888888888889
19.083260669373 1.31205673758865
19.0933724772185 1.37706855791962
19.103484285064 1.38297872340426
19.1135960929096 1.45390070921986
19.1237079007551 1.39479905437352
19.1338197086006 1.44799054373522
19.1439315164462 1.49527186761229
19.1540433242917 1.34751773049645
19.1641551321372 1.26477541371158
19.1742669399828 1.38297872340426
19.1843787478283 1.45981087470449
19.1944905556738 1.47163120567376
19.2046023635194 1.48936170212766
19.2147141713649 1.39479905437352
19.2248259792104 1.30023640661939
19.234937787056 1.28250591016548
19.2450495949015 1.40661938534279
19.255161402747 1.39479905437352
19.2652732105926 1.45390070921986
19.2753850184381 1.34751773049645
19.2854968262836 1.29432624113475
19.2956086341292 1.31796690307329
19.3057204419747 1.25295508274232
19.3158322498202 1.50118203309693
19.3259440576658 1.41843971631206
19.3360558655113 1.13475177304965
19.3461676733568 1.30614657210402
19.3562794812024 1.39479905437352
19.3663912890479 1.40070921985816
19.3765030968934 1.27068557919622
19.386614904739 1.24704491725768
19.3967267125845 1.21158392434988
19.40683852043 1.27659574468085
19.4169503282756 1.43617021276596
19.4270621361211 1.35933806146572
19.4371739439666 1.5661938534279
19.4472857518122 1.37706855791962
19.4573975596577 1.22340425531915
19.4675093675032 1.30023640661939
19.4776211753488 1.25295508274232
19.4877329831943 1.34160756501182
19.4978447910398 1.43026004728132
19.5079565988854 1.43026004728132
19.5180684067309 1.19976359338061
19.5281802145764 1.41843971631206
19.538292022422 1.44799054373522
19.5484038302675 1.26477541371158
19.558515638113 1.28841607565012
19.5686274459586 1.27068557919622
19.5787392538041 1.38888888888889
19.5888510616496 1.46572104018913
19.5989628694952 1.34751773049645
19.6090746773407 1.34160756501182
19.6191864851862 1.31796690307329
19.6292982930318 1.11111111111111
19.6394101008773 1.35342789598109
19.6495219087228 1.33569739952719
19.6596337165684 1.32387706855792
19.6697455244139 1.48345153664303
19.6798573322594 1.22931442080378
19.6899691401049 1.44208037825059
19.7000809479505 1.12293144208038
19.710192755796 1.34160756501182
19.7203045636415 1.24704491725768
19.7304163714871 1.35342789598109
19.7405281793326 1.23522458628842
19.7506399871781 1.40070921985816
19.7607517950237 1.32387706855792
19.7708636028692 1.12884160756501
19.7809754107147 1.48936170212766
19.7910872185603 1.25886524822695
19.8011990264058 1.27659574468085
19.8113108342513 1.37115839243499
19.8214226420969 1.30614657210402
19.8315344499424 1.34160756501182
19.8416462577879 1.23522458628842
19.8517580656335 1.28250591016548
19.861869873479 1.27068557919622
19.8719816813245 1.37706855791962
19.8820934891701 1.22931442080378
19.8922052970156 1.22931442080378
19.9023171048611 1.16430260047281
19.9124289127067 1.31205673758865
19.9225407205522 1.08747044917258
19.9326525283977 1.35933806146572
19.9427643362433 1.33569739952719
19.9528761440888 1.30614657210402
19.9629879519343 1.24704491725768
19.9730997597799 1.22340425531915
19.9832115676254 1.21749408983452
19.9933233754709 1.28841607565012
20.0034351833165 1.27068557919622
20.013546991162 1.57801418439716
20.0236587990075 1.17612293144208
20.0337706068531 1.29432624113475
20.0438824146986 1.11702127659575
20.0539942225441 1.24704491725768
20.0641060303897 1.18203309692671
20.0742178382352 1.35342789598109
20.0843296460807 1.25886524822695
20.0944414539263 1.28250591016548
20.1045532617718 1.30023640661939
20.1146650696173 1.17612293144208
20.1247768774629 1.21749408983452
20.1348886853084 1.26477541371158
20.1450004931539 1.24113475177305
20.1551123009995 1.30023640661939
20.165224108845 1.13475177304965
20.1753359166905 1.17612293144208
20.1854477245361 1.38297872340426
20.1955595323816 1.19976359338061
20.2056713402271 1.38888888888889
20.2157831480727 1.14657210401891
20.2258949559182 1.31205673758865
20.2360067637637 1.12884160756501
20.2461185716093 1.22931442080378
20.2562303794548 1.30023640661939
20.2663421873003 1.28250591016548
20.2764539951459 1.09929078014184
20.2865658029914 1.37115839243499
20.2966776108369 1.18203309692671
20.3067894186825 1.20567375886525
20.316901226528 1.22340425531915
20.3270130343735 1.22340425531915
20.3371248422191 1.32387706855792
20.3472366500646 1.15839243498818
20.3573484579101 1.19385342789598
20.3674602657557 1.11111111111111
20.3775720736012 1.18203309692671
20.3876838814467 1.19976359338061
20.3977956892923 1.13475177304965
20.4079074971378 1.35342789598109
20.4180193049833 1.23522458628842
20.4281311128289 1.15839243498818
20.4382429206744 1.40070921985816
20.4483547285199 1.21749408983452
20.4584665363654 1.42434988179669
20.468578344211 1.16430260047281
20.4786901520565 1.15248226950355
20.488801959902 1.31205673758865
20.4989137677476 1.18794326241135
20.5090255755931 1.21749408983452
20.5191373834386 1.06973995271868
20.5292491912842 1.06382978723404
20.5393609991297 1.27659574468085
20.5494728069752 1.11702127659575
20.5595846148208 1.14066193853428
20.5696964226663 1.27659574468085
20.5798082305118 1.39479905437352
20.5899200383574 1.41252955082742
20.6000318462029 1.25295508274232
20.6101436540484 1.34751773049645
20.620255461894 1.15839243498818
20.6303672697395 1.35342789598109
20.640479077585 1.30614657210402
20.6505908854306 1.21158392434988
20.6607026932761 1.34751773049645
20.6708145011216 1.07565011820331
20.6809263089672 1.27068557919622
20.6910381168127 1.14657210401891
20.7011499246582 1.20567375886525
20.7112617325038 1.12293144208038
20.7213735403493 1.19385342789598
20.7314853481948 1.40070921985816
20.7415971560404 1.19385342789598
20.7517089638859 1.12884160756501
20.7618207717314 1.28841607565012
20.771932579577 1.10520094562648
20.7820443874225 1.21158392434988
20.792156195268 1.25295508274232
20.8022680031136 1.14657210401891
20.8123798109591 1.17021276595745
20.8224916188046 1.25886524822695
20.8326034266502 1.14066193853428
20.8427152344957 1.18203309692671
20.8528270423412 1.20567375886525
20.8629388501868 1.17612293144208
20.8730506580323 1.18794326241135
20.8831624658778 1.48345153664303
20.8932742737234 1.24113475177305
20.9033860815689 1.19976359338061
20.9134978894144 1.17612293144208
20.92360969726 1.35933806146572
20.9337215051055 1.39479905437352
20.943833312951 1.18203309692671
20.9539451207966 1.15248226950355
20.9640569286421 1.21749408983452
20.9741687364876 1.21158392434988
20.9842805443332 1.02245862884161
20.9943923521787 1.14657210401891
21.0045041600242 1.29432624113475
21.0146159678698 1.25886524822695
21.0247277757153 1.44208037825059
21.0348395835608 1.17021276595745
21.0449513914064 1.10520094562648
21.0550631992519 1.22340425531915
21.0651750070974 1.37706855791962
21.075286814943 1.24113475177305
21.0853986227885 1.26477541371158
21.095510430634 1.12884160756501
21.1056222384796 1.11702127659575
21.1157340463251 1.24113475177305
21.1258458541706 1.12293144208038
21.1359576620162 1.24113475177305
21.1460694698617 1.21158392434988
21.1561812777072 1.26477541371158
21.1662930855528 1.12884160756501
21.1764048933983 1.13475177304965
21.1865167012438 1.33569739952719
21.1966285090894 1.27659574468085
21.2067403169349 1.24113475177305
21.2168521247804 1.17021276595745
21.2269639326259 1.24113475177305
21.2370757404715 1.31205673758865
21.247187548317 1.27659574468085
21.2572993561625 1.40070921985816
21.2674111640081 1.16430260047281
21.2775229718536 1.20567375886525
21.2876347796991 1.25295508274232
21.2977465875447 1.12293144208038
21.3078583953902 1.35342789598109
21.3179702032357 1.39479905437352
21.3280820110813 1.31205673758865
21.3381938189268 1.32978723404255
21.3483056267723 1.31796690307329
21.3584174346179 1.13475177304965
21.3685292424634 1.26477541371158
21.3786410503089 1.22340425531915
21.3887528581545 1.34751773049645
21.398864666 1.11702127659575
21.4089764738455 1.18203309692671
21.4190882816911 1.38297872340426
21.4292000895366 1.12293144208038
21.4393118973821 1.10520094562648
21.4494237052277 1.05200945626478
21.4595355130732 1.06382978723404
21.4696473209187 1.10520094562648
21.4797591287643 1.31205673758865
21.4898709366098 1.06973995271868
21.4999827444553 1.38888888888889
21.5100945523009 1.22340425531915
21.5202063601464 1.15248226950355
21.5303181679919 1.27068557919622
21.5404299758375 1.26477541371158
21.550541783683 1.14066193853428
21.5606535915285 1.22931442080378
21.5707653993741 1.38297872340426
21.5808772072196 1.33569739952719
21.5909890150651 1.22931442080378
21.6011008229107 1.18794326241135
21.6112126307562 1.19385342789598
21.6213244386017 1.18203309692671
21.6314362464473 1.32978723404255
21.6415480542928 1.36524822695035
21.6516598621383 1.05200945626478
21.6617716699839 1.32387706855792
21.6718834778294 1.10520094562648
21.6819952856749 1.17021276595745
21.6921070935205 1.22340425531915
21.702218901366 1.12293144208038
21.7123307092115 1.28841607565012
21.7224425170571 1.24113475177305
21.7325543249026 1.28250591016548
21.7426661327481 1.11702127659575
21.7527779405937 1.08156028368794
21.7628897484392 1.37115839243499
21.7730015562847 1.08156028368794
21.7831133641303 1.19385342789598
21.7932251719758 1.14066193853428
21.8033369798213 1.26477541371158
21.8134487876669 1.10520094562648
21.8235605955124 1.12884160756501
21.8336724033579 1.31205673758865
21.8437842112035 1.11702127659575
21.853896019049 1.25886524822695
21.8640078268945 1.07565011820331
21.8741196347401 1.11111111111111
21.8842314425856 1.14066193853428
21.8943432504311 1.19385342789598
21.9044550582767 1.15839243498818
21.9145668661222 1.28841607565012
21.9246786739677 1.34751773049645
21.9347904818133 1.12293144208038
21.9449022896588 1.11702127659575
21.9550140975043 1.09338061465721
21.9651259053499 1.02245862884161
21.9752377131954 1.45390070921986
21.9853495210409 1.25295508274232
21.9954613288864 1.21749408983452
22.005573136732 1.35933806146572
22.0156849445775 1.12884160756501
22.025796752423 1.19976359338061
22.0359085602686 1.13475177304965
22.0460203681141 1.35342789598109
22.0561321759596 1.30023640661939
22.0662439838052 1.26477541371158
22.0763557916507 1.15248226950355
22.0864675994962 1.24704491725768
22.0965794073418 1.17021276595745
22.1066912151873 1.08747044917258
22.1168030230328 1.27068557919622
22.1269148308784 1.35342789598109
22.1370266387239 1.24113475177305
22.1471384465694 1.15248226950355
22.157250254415 1.29432624113475
22.1673620622605 1.08156028368794
22.177473870106 1.31205673758865
22.1875856779516 1.24704491725768
22.1976974857971 1.14657210401891
22.2078092936426 1.22340425531915
22.2179211014882 1.25886524822695
22.2280329093337 1.21158392434988
22.2381447171792 1.11111111111111
22.2482565250248 1.10520094562648
22.2583683328703 1.28841607565012
22.2684801407158 1.24704491725768
22.2785919485614 1.16430260047281
22.2887037564069 1.21158392434988
22.2988155642524 1.25295508274232
22.308927372098 1.22931442080378
22.3190391799435 1.17021276595745
22.329150987789 1.02245862884161
22.3392627956346 1.22931442080378
22.3493746034801 1.04609929078014
22.3594864113256 1.22340425531915
22.3695982191712 1.11111111111111
22.3797100270167 1.25295508274232
22.3898218348622 1.30614657210402
22.3999336427078 1.18203309692671
22.4100454505533 1.30023640661939
22.4201572583988 1.23522458628842
22.4302690662444 1.09929078014184
22.4403808740899 1.13475177304965
22.4504926819354 1.14657210401891
22.460604489781 1.09929078014184
22.4707162976265 1.08156028368794
22.480828105472 1.21158392434988
22.4909399133176 1.30614657210402
22.5010517211631 1.25295508274232
22.5111635290086 1.47163120567376
22.5212753368542 1.17612293144208
22.5313871446997 1.11702127659575
22.5414989525452 1.25886524822695
22.5516107603908 1.23522458628842
22.5617225682363 1.27068557919622
22.5718343760818 1.12884160756501
22.5819461839274 1.18203309692671
22.5920579917729 1.19976359338061
22.6021697996184 1.08747044917258
22.612281607464 1.29432624113475
22.6223934153095 1.25295508274232
22.632505223155 1.22340425531915
22.6426170310006 0.939716312056738
22.6527288388461 1.20567375886525
22.6628406466916 1.30614657210402
22.6729524545372 1.08156028368794
22.6830642623827 1.20567375886525
22.6931760702282 1.22931442080378
22.7032878780738 1.11702127659575
22.7133996859193 1.25295508274232
22.7235114937648 1.21158392434988
22.7336233016104 1.04018912529551
22.7437351094559 1.08156028368794
22.7538469173014 1.36524822695035
22.7639587251469 1.25886524822695
22.7740705329925 1.18794326241135
22.784182340838 1.27068557919622
22.7942941486835 1.14657210401891
22.8044059565291 1.21158392434988
22.8145177643746 1.23522458628842
22.8246295722201 1.14066193853428
22.8347413800657 1.21749408983452
22.8448531879112 1.14066193853428
22.8549649957567 1.09929078014184
22.8650768036023 1.22931442080378
22.8751886114478 1.27068557919622
22.8853004192933 1.28250591016548
22.8954122271389 1.07565011820331
22.9055240349844 1.14657210401891
22.9156358428299 1.22931442080378
22.9257476506755 1.23522458628842
22.935859458521 1.28841607565012
22.9459712663665 1.17612293144208
22.9560830742121 1.25886524822695
22.9661948820576 1.22931442080378
22.9763066899031 1.11702127659575
22.9864184977487 1.22931442080378
22.9965303055942 1.31205673758865
23.0066421134397 1.16430260047281
23.0167539212853 1.24113475177305
23.0268657291308 1.25295508274232
23.0369775369763 1.21158392434988
23.0470893448219 1.26477541371158
23.0572011526674 1.13475177304965
23.0673129605129 1.24704491725768
23.0774247683585 1.19385342789598
23.087536576204 1.19385342789598
23.0976483840495 1.18203309692671
23.1077601918951 1.21158392434988
23.1178719997406 1.24704491725768
23.1279838075861 1.17612293144208
23.1380956154317 1.19385342789598
23.1482074232772 1.16430260047281
23.1583192311227 1.36524822695035
23.1684310389683 1.12293144208038
23.1785428468138 1.18794326241135
23.1886546546593 1.08747044917258
23.1987664625049 1.12293144208038
23.2088782703504 1.26477541371158
23.2189900781959 1.13475177304965
23.2291018860415 1.29432624113475
23.239213693887 1.19976359338061
23.2493255017325 1.31796690307329
23.2594373095781 1.24704491725768
23.2695491174236 1.17021276595745
23.2796609252691 1.19385342789598
23.2897727331147 1.26477541371158
23.2998845409602 1.25295508274232
23.3099963488057 1.08747044917258
23.3201081566513 1.09338061465721
23.3302199644968 1.26477541371158
23.3403317723423 1.14066193853428
23.3504435801879 1.20567375886525
23.3605553880334 1.12293144208038
23.3706671958789 1.26477541371158
23.3807790037245 1.43617021276596
23.39089081157 1.17021276595745
23.4010026194155 1.27068557919622
23.4111144272611 1.31205673758865
23.4212262351066 1.31205673758865
23.4313380429521 1.16430260047281
23.4414498507977 1.17021276595745
23.4515616586432 1.13475177304965
23.4616734664887 1.17021276595745
23.4717852743343 1.31205673758865
23.4818970821798 1.35342789598109
23.4920088900253 1.09338061465721
23.5021206978709 1.31205673758865
23.5122325057164 1.31205673758865
23.5223443135619 1.23522458628842
23.5324561214074 1.32387706855792
23.542567929253 1.24704491725768
23.5526797370985 1.16430260047281
23.562791544944 1.19385342789598
23.5729033527896 1.11111111111111
23.5830151606351 1.25886524822695
23.5931269684806 1.18794326241135
23.6032387763262 1.12884160756501
23.6133505841717 1.33569739952719
23.6234623920172 1.08747044917258
23.6335741998628 1.18794326241135
23.6436860077083 1.25295508274232
23.6537978155538 1.22931442080378
23.6639096233994 1.12293144208038
23.6740214312449 1.11702127659575
23.6841332390904 1.19976359338061
23.694245046936 1.13475177304965
23.7043568547815 1.19385342789598
23.714468662627 1.25886524822695
23.7245804704726 1.04609929078014
23.7346922783181 1.32387706855792
23.7448040861636 1.22340425531915
23.7549158940092 1.17021276595745
23.7650277018547 1.19976359338061
23.7751395097002 1.14066193853428
23.7852513175458 1.24113475177305
23.7953631253913 1.06382978723404
23.8054749332368 1.15248226950355
23.8155867410824 1.27068557919622
23.8256985489279 1.21749408983452
23.8358103567734 1.15248226950355
23.845922164619 1.33569739952719
23.8560339724645 1.20567375886525
23.86614578031 1.14657210401891
23.8762575881556 1.28841607565012
23.8863693960011 1.11702127659575
23.8964812038466 1.29432624113475
23.9065930116922 1.32387706855792
23.9167048195377 1.22340425531915
23.9268166273832 1.12293144208038
23.9369284352288 1.20567375886525
23.9470402430743 1.34160756501182
23.9571520509198 1.05791962174941
23.9672638587654 1.27068557919622
23.9773756666109 1.21749408983452
23.9874874744564 1.19976359338061
23.997599282302 1.25295508274232
24.0077110901475 1.41252955082742
24.017822897993 1.02836879432624
24.0279347058386 1.27068557919622
24.0380465136841 1.28841607565012
24.0481583215296 1.13475177304965
24.0582701293752 1.15839243498818
24.0683819372207 1.29432624113475
24.0784937450662 1.17021276595745
24.0886055529118 1.26477541371158
24.0987173607573 1.16430260047281
24.1088291686028 1.08747044917258
24.1189409764484 1.13475177304965
24.1290527842939 0.951536643026005
24.1391645921394 1.20567375886525
24.149276399985 1.31205673758865
24.1593882078305 1.40070921985816
24.169500015676 1.10520094562648
24.1796118235216 1.28841607565012
24.1897236313671 1.25295508274232
24.1998354392126 1.22931442080378
24.2099472470582 1.29432624113475
24.2200590549037 1.23522458628842
24.2301708627492 1.27659574468085
24.2402826705948 1.22340425531915
24.2503944784403 1.20567375886525
24.2605062862858 1.23522458628842
24.2706180941314 1.18794326241135
24.2807299019769 0.904255319148936
24.2908417098224 1.37115839243499
24.3009535176679 1.17021276595745
24.3110653255135 1.12884160756501
24.321177133359 1.20567375886525
24.3312889412045 1.19976359338061
24.3414007490501 1.16430260047281
24.3515125568956 1.07565011820331
24.3616243647411 1.27068557919622
24.3717361725867 1.40070921985816
24.3818479804322 1.17612293144208
24.3919597882777 1.22931442080378
24.4020715961233 1.04609929078014
24.4121834039688 1.30614657210402
24.4222952118143 1.08747044917258
24.4324070196599 1.01654846335697
24.4425188275054 1.19976359338061
24.4526306353509 0.981087470449173
24.4627424431965 1.18203309692671
24.472854251042 1.02836879432624
24.4829660588875 1.19976359338061
24.4930778667331 1.28250591016548
24.5031896745786 1.17612293144208
24.5133014824241 1.18203309692671
24.5234132902697 1.06973995271868
24.5335250981152 1.08156028368794
24.5436369059607 1.12293144208038
24.5537487138063 1.09929078014184
24.5638605216518 1.15248226950355
24.5739723294973 1.27659574468085
24.5840841373429 1.16430260047281
24.5941959451884 1.27068557919622
24.6043077530339 1.32978723404255
24.6144195608795 1.15839243498818
24.624531368725 1.25295508274232
24.6346431765705 1.28841607565012
24.6447549844161 1.09338061465721
24.6548667922616 1.08747044917258
24.6649786001071 1.27068557919622
24.6750904079527 1.18203309692671
24.6852022157982 1.08156028368794
24.6953140236437 1.18203309692671
24.7054258314893 1.10520094562648
24.7155376393348 1.10520094562648
24.7256494471803 1.06973995271868
24.7357612550259 1.15839243498818
24.7458730628714 1.24704491725768
24.7559848707169 1.13475177304965
24.7660966785625 1.12293144208038
24.776208486408 1.12293144208038
24.7863202942535 1.05200945626478
24.7964321020991 1.14066193853428
24.8065439099446 0.951536643026005
24.8166557177901 1.16430260047281
24.8267675256357 1.34751773049645
24.8368793334812 1.14066193853428
24.8469911413267 1.31796690307329
24.8571029491723 1.09338061465721
24.8672147570178 1.09338061465721
24.8773265648633 1.21158392434988
24.8874383727089 1.24113475177305
24.8975501805544 1.03427895981087
24.9076619883999 1.11111111111111
24.9177737962455 1.11702127659575
24.927885604091 1.34160756501182
24.9379974119365 1.27068557919622
24.9481092197821 1.33569739952719
24.9582210276276 1.15248226950355
24.9683328354731 1.12884160756501
24.9784446433187 0.969267139479906
24.9885564511642 1.04609929078014
24.9986682590097 1.04609929078014
25.0087800668553 1.28841607565012
25.0188918747008 0.969267139479906
25.0290036825463 1.19976359338061
25.0391154903919 1.06382978723404
25.0492272982374 1.13475177304965
25.0593391060829 1.17021276595745
25.0694509139284 1.15839243498818
25.079562721774 1.05200945626478
25.0896745296195 1.14657210401891
25.099786337465 1.04018912529551
25.1098981453106 1.09929078014184
25.1200099531561 1.27068557919622
25.1301217610016 1.08747044917258
25.1402335688472 1.21749408983452
25.1503453766927 0.998817966903074
25.1604571845382 1.24113475177305
25.1705689923838 1.29432624113475
25.1806808002293 1.15248226950355
25.1907926080748 1.09929078014184
25.2009044159204 1.06382978723404
25.2110162237659 1.31205673758865
25.2211280316114 1.24113475177305
25.231239839457 1.21749408983452
25.2413516473025 1.24113475177305
25.251463455148 1.12884160756501
25.2615752629936 1.00472813238771
25.2716870708391 1.27068557919622
25.2817988786846 1.14657210401891
25.2919106865302 1.05791962174941
25.3020224943757 1.17612293144208
25.3121343022212 1.28250591016548
25.3222461100668 0.951536643026005
25.3323579179123 1.14657210401891
25.3424697257578 1.22340425531915
25.3525815336034 1.24704491725768
25.3626933414489 1.31205673758865
25.3728051492944 1.22931442080378
25.38291695714 1.10520094562648
25.3930287649855 1.08747044917258
25.403140572831 1.00472813238771
25.4132523806766 1.14066193853428
25.4233641885221 1.02245862884161
25.4334759963676 1.23522458628842
25.4435878042132 1.29432624113475
25.4536996120587 1.24113475177305
25.4638114199042 1.11111111111111
25.4739232277498 1.16430260047281
25.4840350355953 1.17021276595745
25.4941468434408 1.04018912529551
25.5042586512864 1.15248226950355
25.5143704591319 1.19976359338061
25.5244822669774 1.19385342789598
25.534594074823 1.06382978723404
25.5447058826685 1.31796690307329
25.554817690514 1.20567375886525
25.5649294983596 1.12293144208038
25.5750413062051 1.09929078014184
25.5851531140506 1.16430260047281
25.5952649218962 1.17021276595745
25.6053767297417 1.27068557919622
25.6154885375872 1.23522458628842
25.6256003454328 1.07565011820331
25.6357121532783 1.15839243498818
25.6458239611238 1.12884160756501
25.6559357689694 1.22340425531915
25.6660475768149 1.20567375886525
25.6761593846604 1.26477541371158
25.686271192506 1.15839243498818
25.6963830003515 1.22340425531915
25.706494808197 1.19385342789598
25.7166066160426 1.32978723404255
25.7267184238881 1.04018912529551
25.7368302317336 1.18794326241135
25.7469420395792 1.25295508274232
25.7570538474247 1.32387706855792
25.7671656552702 1.17612293144208
25.7772774631158 1.29432624113475
25.7873892709613 1.14657210401891
25.7975010788068 1.15248226950355
25.8076128866524 1.16430260047281
25.8177246944979 1.06973995271868
25.8278365023434 1.27659574468085
25.8379483101889 1.18794326241135
25.8480601180345 1.38297872340426
25.85817192588 1.14066193853428
25.8682837337255 1.05791962174941
25.8783955415711 1.18794326241135
25.8885073494166 1.22931442080378
25.8986191572621 1.12884160756501
25.9087309651077 1.17021276595745
25.9188427729532 1.28841607565012
25.9289545807987 1.16430260047281
25.9390663886443 1.08747044917258
25.9491781964898 1.17612293144208
25.9592900043353 1.17612293144208
25.9694018121809 1.15248226950355
25.9795136200264 1.27068557919622
25.9896254278719 1.18203309692671
25.9997372357175 1.09338061465721
26.009849043563 1.25295508274232
26.0199608514085 1.14657210401891
26.0300726592541 1.21158392434988
26.0401844670996 1.35342789598109
26.0502962749451 1.21158392434988
26.0604080827907 1.11702127659575
26.0705198906362 1.09929078014184
26.0806316984817 1.20567375886525
26.0907435063273 1.04018912529551
26.1008553141728 1.31205673758865
26.1109671220183 1.35933806146572
26.1210789298639 1.21158392434988
26.1311907377094 1.01063829787234
26.1413025455549 1.14066193853428
26.1514143534005 1.24704491725768
26.161526161246 1.23522458628842
26.1716379690915 1.26477541371158
26.1817497769371 1.19385342789598
26.1918615847826 1.19976359338061
26.2019733926281 1.26477541371158
26.2120852004737 1.31796690307329
26.2221970083192 1.18794326241135
26.2323088161647 1.24704491725768
26.2424206240103 1.16430260047281
26.2525324318558 0.998817966903074
26.2626442397013 1.06973995271868
26.2727560475469 1.26477541371158
26.2828678553924 1.21158392434988
26.2929796632379 1.27659574468085
26.3030914710835 1.10520094562648
26.313203278929 1.19976359338061
26.3233150867745 1.25295508274232
26.3334268946201 1.10520094562648
26.3435387024656 1.31205673758865
26.3536505103111 1.18203309692671
26.3637623181567 1.26477541371158
26.3738741260022 1.08747044917258
26.3839859338477 0.851063829787234
26.3940977416933 1.18203309692671
26.4042095495388 1.24113475177305
26.4143213573843 1.22340425531915
26.4244331652299 1.11111111111111
26.4345449730754 1.01063829787234
26.4446567809209 1.20567375886525
26.4547685887665 1.35933806146572
26.464880396612 1.19976359338061
26.4749922044575 1.09338061465721
26.4851040123031 1.25295508274232
26.4952158201486 1.20567375886525
26.5053276279941 1.21158392434988
26.5154394358397 1.27068557919622
26.5255512436852 1.31205673758865
26.5356630515307 1.31205673758865
26.5457748593763 1.21158392434988
26.5558866672218 1.14066193853428
26.5659984750673 1.07565011820331
26.5761102829129 1.19385342789598
26.5862220907584 1.14657210401891
26.5963338986039 1.14066193853428
26.6064457064494 1.18203309692671
26.616557514295 1.18794326241135
26.6266693221405 1.26477541371158
26.636781129986 1.37115839243499
26.6468929378316 1.27659574468085
26.6570047456771 1.27659574468085
26.6671165535226 1.27068557919622
26.6772283613682 1.24113475177305
26.6873401692137 1.15839243498818
26.6974519770592 1.13475177304965
26.7075637849048 1.04018912529551
26.7176755927503 1.18794326241135
26.7277874005958 1.19385342789598
26.7378992084414 1.24704491725768
26.7480110162869 1.23522458628842
26.7581228241324 1.12884160756501
26.768234631978 1.15839243498818
26.7783464398235 1.12884160756501
26.788458247669 1.21158392434988
26.7985700555146 1.05791962174941
26.8086818633601 1.15839243498818
26.8187936712056 1.19976359338061
26.8289054790512 1.25886524822695
26.8390172868967 1.09929078014184
26.8491290947422 1.03427895981087
26.8592409025878 1.11702127659575
26.8693527104333 1.22340425531915
26.8794645182788 1.07565011820331
26.8895763261244 1.19976359338061
26.8996881339699 1.23522458628842
26.9097999418154 1.19385342789598
26.919911749661 1.17612293144208
26.9300235575065 1.14066193853428
26.940135365352 1.22931442080378
26.9502471731976 1.08747044917258
26.9603589810431 1.22340425531915
26.9704707888886 1.31205673758865
26.9805825967342 1.09338061465721
26.9906944045797 0.957446808510638
27.0008062124252 1.25295508274232
27.0109180202708 1.22340425531915
27.0210298281163 1.17021276595745
27.0311416359618 1.22340425531915
27.0412534438074 1.16430260047281
27.0513652516529 1.31205673758865
27.0614770594984 1.24704491725768
27.071588867344 1.24113475177305
27.0817006751895 1.14066193853428
27.091812483035 1.17612293144208
27.1019242908806 1.27068557919622
27.1120360987261 1.12293144208038
27.1221479065716 1.14066193853428
27.1322597144172 1.15248226950355
27.1423715222627 0.998817966903074
27.1524833301082 1.15839243498818
27.1625951379538 1.09929078014184
27.1727069457993 1.12293144208038
27.1828187536448 1.18203309692671
27.1929305614904 1.28250591016548
27.2030423693359 1.14657210401891
27.2131541771814 1.18203309692671
27.223265985027 1.16430260047281
27.2333777928725 1.32387706855792
27.243489600718 1.23522458628842
27.2536014085636 1.23522458628842
27.2637132164091 1.18794326241135
27.2738250242546 1.28841607565012
27.2839368321002 1.14066193853428
27.2940486399457 1.06973995271868
27.3041604477912 1.09338061465721
27.3142722556368 1.10520094562648
27.3243840634823 1.08156028368794
27.3344958713278 1.07565011820331
27.3446076791734 1.23522458628842
27.3547194870189 1.14066193853428
27.3648312948644 1.13475177304965
27.3749431027099 1.08747044917258
27.3850549105555 1.26477541371158
27.395166718401 1.17021276595745
27.4052785262465 1.19385342789598
27.4153903340921 1.11702127659575
27.4255021419376 1.19385342789598
27.4356139497831 1.03427895981087
27.4457257576287 1.05791962174941
27.4558375654742 1.17612293144208
27.4659493733197 1.07565011820331
27.4760611811653 1.04609929078014
27.4861729890108 1.06382978723404
27.4962847968563 1.16430260047281
27.5063966047019 1.16430260047281
27.5165084125474 1.12884160756501
27.5266202203929 1.11702127659575
27.5367320282385 1.21158392434988
27.546843836084 1.12293144208038
27.5569556439295 1.17612293144208
27.5670674517751 1.18203309692671
27.5771792596206 1.27068557919622
27.5872910674661 1.01654846335697
27.5974028753117 1.12293144208038
27.6075146831572 1.16430260047281
27.6176264910027 1.16430260047281
27.6277382988483 1.30023640661939
27.6378501066938 1.12884160756501
27.6479619145393 1.13475177304965
27.6580737223849 1.17021276595745
27.6681855302304 1.17021276595745
27.6782973380759 1.05200945626478
27.6884091459215 1.28250591016548
27.698520953767 1.27068557919622
27.7086327616125 1.13475177304965
27.7187445694581 1.25886524822695
27.7288563773036 1.15839243498818
27.7389681851491 1.18203309692671
27.7490799929947 1.30023640661939
27.7591918008402 1.25295508274232
27.7693036086857 1.07565011820331
27.7794154165313 1.08747044917258
27.7895272243768 1.06382978723404
27.7996390322223 1.21158392434988
27.8097508400679 1.18203309692671
27.8198626479134 1.14066193853428
27.8299744557589 1.27068557919622
27.8400862636045 1.25886524822695
27.85019807145 1.17612293144208
27.8603098792955 1.12293144208038
27.8704216871411 1.18794326241135
27.8805334949866 1.35933806146572
27.8906453028321 1.27659574468085
27.9007571106777 1.13475177304965
27.9108689185232 1.19976359338061
27.9209807263687 1.05200945626478
27.9310925342143 1.08747044917258
27.9412043420598 1.22931442080378
27.9513161499053 1.34751773049645
27.9614279577509 1.17021276595745
27.9715397655964 1.25295508274232
27.9816515734419 1.17021276595745
27.9917633812875 1.08156028368794
28.001875189133 1.28841607565012
28.0119869969785 1.02836879432624
28.0220988048241 1.13475177304965
28.0322106126696 1.17612293144208
28.0423224205151 1.02245862884161
28.0524342283607 1.23522458628842
28.0625460362062 1.23522458628842
28.0726578440517 1.25295508274232
28.0827696518973 1.22340425531915
28.0928814597428 1.14066193853428
28.1029932675883 1.14657210401891
28.1131050754339 1.19385342789598
28.1232168832794 1.12293144208038
28.1333286911249 1.24113475177305
28.1434404989704 1.28841607565012
28.153552306816 1.24113475177305
28.1636641146615 1.27659574468085
28.173775922507 1.09929078014184
28.1838877303526 1.17021276595745
28.1939995381981 1.18794326241135
28.2041113460436 1.35933806146572
28.2142231538892 1.25886524822695
28.2243349617347 1.20567375886525
28.2344467695802 1.20567375886525
28.2445585774258 1.26477541371158
28.2546703852713 1.19976359338061
28.2647821931168 1.27659574468085
28.2748940009624 1.17612293144208
28.2850058088079 1.22340425531915
28.2951176166534 1.16430260047281
28.305229424499 1.30614657210402
28.3153412323445 0.986997635933806
28.32545304019 1.29432624113475
28.3355648480356 1.23522458628842
28.3456766558811 1.23522458628842
28.3557884637266 1.18203309692671
28.3659002715722 1.30023640661939
28.3760120794177 1.22340425531915
28.3861238872632 1.24113475177305
28.3962356951088 1.29432624113475
28.4063475029543 1.13475177304965
28.4164593107998 1.25295508274232
28.4265711186454 1.22931442080378
28.4366829264909 1.04609929078014
28.4467947343364 1.12293144208038
28.456906542182 1.24113475177305
28.4670183500275 1.27068557919622
28.477130157873 1.18794326241135
28.4872419657186 1.17612293144208
28.4973537735641 1.35933806146572
28.5074655814096 1.27659574468085
28.5175773892552 1.12293144208038
28.5276891971007 1.34160756501182
28.5378010049462 1.32978723404255
28.5479128127918 1.24113475177305
28.5580246206373 1.30614657210402
28.5681364284828 1.22931442080378
28.5782482363284 1.18794326241135
28.5883600441739 1.21749408983452
28.5984718520194 1.25886524822695
28.608583659865 1.22931442080378
28.6186954677105 1.12884160756501
28.628807275556 1.18203309692671
28.6389190834016 1.15839243498818
28.6490308912471 1.17021276595745
28.6591426990926 1.36524822695035
28.6692545069382 1.33569739952719
28.6793663147837 1.27659574468085
28.6894781226292 1.22340425531915
28.6995899304748 1.25295508274232
28.7097017383203 1.42434988179669
28.7198135461658 1.29432624113475
28.7299253540114 1.19385342789598
28.7400371618569 1.40070921985816
28.7501489697024 1.37115839243499
28.760260777548 1.23522458628842
28.7703725853935 1.33569739952719
28.780484393239 1.17612293144208
28.7905962010846 1.28841607565012
28.8007080089301 1.43026004728132
28.8108198167756 1.30614657210402
28.8209316246212 1.39479905437352
28.8310434324667 1.24113475177305
28.8411552403122 1.24704491725768
28.8512670481578 1.37706855791962
28.8613788560033 1.09338061465721
28.8714906638488 1.47163120567376
28.8816024716944 1.44208037825059
28.8917142795399 1.45390070921986
28.9018260873854 1.35933806146572
28.9119378952309 1.37115839243499
28.9220497030765 1.35342789598109
28.932161510922 1.22931442080378
28.9422733187675 1.44799054373522
28.9523851266131 1.27659574468085
28.9624969344586 1.45981087470449
28.9726087423041 1.28841607565012
28.9827205501497 1.46572104018913
28.9928323579952 1.41252955082742
29.0029441658407 1.40661938534279
29.0130559736863 1.39479905437352
29.0231677815318 1.43617021276596
29.0332795893773 1.44799054373522
29.0433913972229 1.40070921985816
29.0535032050684 1.37706855791962
29.0636150129139 1.48936170212766
29.0737268207595 1.45981087470449
29.083838628605 1.31796690307329
29.0939504364505 1.40070921985816
29.1040622442961 1.37706855791962
29.1141740521416 1.39479905437352
29.1242858599871 1.53073286052009
29.1343976678327 1.548463356974
29.1445094756782 1.67848699763593
29.1546212835237 1.53073286052009
29.1647330913693 1.44799054373522
29.1748448992148 1.53073286052009
29.1849567070603 1.5661938534279
29.1950685149059 1.51891252955083
29.2051803227514 1.54255319148936
29.2152921305969 1.46572104018913
29.2254039384425 1.53073286052009
29.235515746288 1.40070921985816
29.2456275541335 1.59574468085106
29.2557393619791 1.59574468085106
29.2658511698246 1.5839243498818
29.2759629776701 1.30023640661939
29.2860747855157 1.69621749408983
29.2961865933612 1.48345153664303
29.3062984012067 1.51891252955083
29.3164102090523 1.57210401891253
29.3265220168978 1.6016548463357
29.3366338247433 1.548463356974
29.3467456325889 1.7080378250591
29.3568574404344 1.74940898345154
29.3669692482799 1.69621749408983
29.3770810561255 1.67848699763593
29.387192863971 1.6016548463357
29.3973046718165 2.14539007092199
29.4074164796621 2.13947990543735
29.4175282875076 2.26950354609929
29.4276400953531 2.22222222222222
29.4377519031987 2.5531914893617
29.4478637110442 2.35224586288416
29.4579755188897 2.4290780141844
29.4680873267353 2.42316784869976
29.4781991345808 2.47635933806147
29.4883109424263 2.76595744680851
29.4984227502719 2.80732860520095
29.5085345581174 2.78959810874705
29.5186463659629 2.5354609929078
29.5287581738085 2.61820330969267
29.538869981654 2.49408983451537
29.5489817894995 2.05673758865248
29.5590935973451 2.12765957446809
29.5692054051906 1.96217494089835
29.5793172130361 2.33451536643026
29.5894290208817 1.96217494089835
29.5995408287272 2.13356973995272
29.6096526365727 2.12765957446809
29.6197644444183 2.10401891252955
29.6298762522638 2.05673758865248
29.6399880601093 2.00354609929078
29.6500998679549 1.73758865248227
29.6602116758004 1.87352245862884
29.6703234836459 2.12765957446809
29.6804352914914 2.03900709219858
29.690547099337 1.93262411347518
29.7006589071825 2.17494089834515
29.710770715028 2.02718676122931
29.7208825228736 2.05082742316785
29.7309943307191 2.15721040189125
29.7411061385646 2.08037825059102
29.7512179464102 1.97990543735225
29.7613297542557 2.16312056737589
29.7714415621012 2.07446808510638
29.7815533699468 2.02718676122931
29.7916651777923 2.11583924349882
29.8017769856378 2.23995271867612
29.8118887934834 2.26950354609929
29.8220006013289 1.82033096926714
29.8321124091744 2.07446808510638
29.84222421702 2.09810874704492
29.8523360248655 2.14539007092199
29.862447832711 2.19267139479906
29.8725596405566 2.10992907801419
29.8826714484021 2.43498817966903
29.8927832562476 2.34633569739953
29.9028950640932 2.18676122931442
29.9130068719387 2.28132387706856
29.9231186797842 2.38179669030733
29.9332304876298 2.29905437352246
29.9433422954753 2.45271867612293
29.9534541033208 2.22222222222222
29.9635659111664 2.48817966903073
29.9736777190119 2.38770685579196
29.9837895268574 2.59456264775414
29.993901334703 2.52955082742317
30.0040131425485 2.58274231678487
30.014124950394 2.39952718676123
30.0242367582396 2.32269503546099
30.0343485660851 2.54137115839244
30.0444603739306 2.32860520094563
30.0545721817762 2.60047281323877
30.0646839896217 2.42316784869976
30.0747957974672 2.52955082742317
30.0849076053128 2.36406619385343
30.0950194131583 2.54137115839244
30.1051312210038 2.81323877068558
30.1152430288494 2.4290780141844
30.1253548366949 2.56501182033097
30.1354666445404 2.82505910165485
30.145578452386 2.28132387706856
30.1556902602315 2.3936170212766
30.165802068077 2.3758865248227
30.1759138759226 2.63002364066194
30.1860256837681 2.36406619385343
30.1961374916136 2.73049645390071
30.2062492994592 2.64775413711584
30.2163611073047 2.36406619385343
30.2264729151502 2.44089834515366
30.2365847229958 2.5177304964539
30.2466965308413 2.34042553191489
30.2568083386868 2.32860520094563
30.2669201465324 2.45862884160757
30.2770319543779 2.55910165484634
30.2871437622234 2.4468085106383
30.297255570069 2.61229314420804
30.3073673779145 2.76004728132388
30.31747918576 2.60638297872341
30.3275909936056 2.5
30.3377028014511 2.38770685579196
30.3478146092966 2.42316784869976
30.3579264171422 2.4113475177305
30.3680382249877 2.52955082742317
30.3781500328332 2.36997635933806
30.3882618406788 2.42316784869976
30.3983736485243 2.49408983451537
30.4084854563698 2.63593380614657
30.4185972642154 2.4290780141844
30.4287090720609 2.34042553191489
30.4388208799064 2.56501182033097
30.4489326877519 2.14539007092199
30.4590444955975 2.56501182033097
30.469156303443 2.12174940898345
30.4792681112885 2.22222222222222
30.4893799191341 2.41725768321513
30.4994917269796 2.51182033096927
30.5096035348251 2.18085106382979
30.5197153426707 2.24586288416076
30.5298271505162 2.20449172576832
30.5399389583617 2.26950354609929
30.5500507662073 2.5531914893617
30.5601625740528 2.21631205673759
30.5702743818983 2.19858156028369
30.5803861897439 2.32860520094563
30.5904979975894 2.25177304964539
30.6006098054349 2.10992907801419
30.6107216132805 2.05082742316785
30.620833421126 2.13356973995272
30.6309452289715 2.15130023640662
30.6410570368171 2.3758865248227
30.6511688446626 2.18676122931442
30.6612806525081 2.09219858156028
30.6713924603537 2.29314420803783
30.6815042681992 2.11583924349882
30.6916160760447 2.05082742316785
30.7017278838903 2.09810874704492
30.7118396917358 2.09219858156028
30.7219514995813 1.92080378250591
30.7320633074269 2.24586288416076
30.7421751152724 2.13947990543735
30.7522869231179 1.83806146572104
30.7623987309635 1.96808510638298
30.772510538809 2.02718676122931
30.7826223466545 2.31087470449173
30.7927341545001 1.80260047281324
30.8028459623456 2.05082742316785
30.8129577701911 2.07446808510638
30.8230695780367 1.80260047281324
30.8331813858822 1.87943262411348
30.8432931937277 2.21040189125296
30.8534050015733 1.87352245862884
30.8635168094188 1.91489361702128
30.8736286172643 2.02718676122931
30.8837404251099 1.73167848699764
30.8938522329554 1.89125295508274
30.9039640408009 1.92671394799054
30.9140758486465 1.97399527186761
30.924187656492 1.90898345153664
30.9342994643375 1.93262411347518
30.9444112721831 1.97399527186761
30.9545230800286 2.11583924349882
30.9646348878741 1.82033096926714
30.9747466957197 1.7434988179669
30.9848585035652 2.06264775413712
30.9949703114107 1.75531914893617
31.0050821192563 1.90898345153664
31.0151939271018 1.86761229314421
31.0253057349473 1.82624113475177
31.0354175427929 1.89716312056738
31.0455293506384 1.89125295508274
31.0556411584839 1.84397163120567
31.0657529663295 1.83215130023641
31.075864774175 1.84988179669031
31.0859765820205 1.63120567375887
31.0960883898661 1.67848699763593
31.1062001977116 1.7434988179669
31.1163120055571 1.79669030732861
31.1264238134027 1.58983451536643
31.1365356212482 1.45981087470449
31.1466474290937 1.7789598108747
31.1567592369393 1.84988179669031
31.1668710447848 1.51300236406619
31.1769828526303 1.55437352245863
31.1870946604759 1.61347517730496
31.1972064683214 1.48345153664303
31.2073182761669 1.63120567375887
31.2174300840124 1.67848699763593
31.227541891858 1.41843971631206
31.2376536997035 1.73167848699764
31.247765507549 1.58983451536643
31.2578773153946 1.56028368794326
31.2679891232401 1.45390070921986
31.2781009310856 1.57801418439716
31.2882127389312 1.51891252955083
31.2983245467767 1.44799054373522
31.3084363546222 1.40070921985816
31.3185481624678 1.60756501182033
31.3286599703133 1.58983451536643
31.3387717781588 1.64893617021277
31.3488835860044 1.48936170212766
31.3589953938499 1.53664302600473
31.3691072016954 1.548463356974
31.379219009541 1.45390070921986
31.3893308173865 1.61347517730496
31.399442625232 1.61347517730496
31.4095544330776 1.53664302600473
31.4196662409231 1.41843971631206
31.4297780487686 1.37115839243499
31.4398898566142 1.50118203309693
31.4500016644597 1.44799054373522
31.4601134723052 1.31796690307329
31.4702252801508 1.47163120567376
31.4803370879963 1.38297872340426
31.4904488958418 1.37115839243499
31.5005607036874 1.45981087470449
31.5106725115329 1.53073286052009
31.5207843193784 1.38888888888889
31.530896127224 1.30023640661939
31.5410079350695 1.38888888888889
31.551119742915 1.46572104018913
31.5612315507606 1.37706855791962
31.5713433586061 1.55437352245863
31.5814551664516 1.60756501182033
31.5915669742972 1.45390070921986
31.6016787821427 1.41252955082742
31.6117905899882 1.25886524822695
31.6219023978338 1.27659574468085
31.6320142056793 1.51300236406619
31.6421260135248 1.38888888888889
31.6522378213704 1.39479905437352
31.6623496292159 1.45390070921986
31.6724614370614 1.44799054373522
31.682573244907 1.43617021276596
31.6926850527525 1.48345153664303
31.702796860598 1.28841607565012
31.7129086684436 1.32978723404255
31.7230204762891 1.35342789598109
31.7331322841346 1.41252955082742
31.7432440919802 1.28250591016548
31.7533558998257 1.28250591016548
31.7634677076712 1.25295508274232
31.7735795155168 1.47754137115839
31.7836913233623 1.45981087470449
31.7938031312078 1.25886524822695
31.8039149390534 1.38297872340426
31.8140267468989 1.30023640661939
31.8241385547444 1.52482269503546
31.83425036259 1.35933806146572
31.8443621704355 1.37115839243499
31.854473978281 1.54255319148936
31.8645857861266 1.38297872340426
31.8746975939721 1.29432624113475
31.8848094018176 1.32978723404255
31.8949212096632 1.44799054373522
31.9050330175087 1.37706855791962
31.9151448253542 1.24704491725768
31.9252566331998 1.54255319148936
31.9353684410453 1.39479905437352
31.9454802488908 1.33569739952719
31.9555920567364 1.40070921985816
31.9657038645819 1.39479905437352
31.9758156724274 1.37115839243499
31.9859274802729 1.44208037825059
31.9960392881185 1.30023640661939
32.006151095964 1.26477541371158
32.0162629038095 1.41843971631206
32.0263747116551 1.43026004728132
32.0364865195006 1.38297872340426
32.0465983273461 1.31796690307329
32.0567101351917 1.21158392434988
32.0668219430372 1.40661938534279
32.0769337508827 1.23522458628842
32.0870455587283 1.48936170212766
32.0971573665738 1.35933806146572
32.1072691744193 1.27659574468085
32.1173809822649 1.34160756501182
32.1274927901104 1.20567375886525
32.1376045979559 1.22931442080378
32.1477164058015 1.52482269503546
32.157828213647 1.27068557919622
32.1679400214925 1.26477541371158
32.1780518293381 1.11111111111111
32.1881636371836 1.24113475177305
32.1982754450291 1.39479905437352
32.2083872528747 1.25295508274232
32.2184990607202 1.43617021276596
32.2286108685657 1.46572104018913
32.2387226764113 1.44208037825059
32.2488344842568 1.39479905437352
32.2589462921023 1.43026004728132
32.2690580999479 1.23522458628842
32.2791699077934 1.30023640661939
32.2892817156389 1.37115839243499
32.2993935234845 1.39479905437352
32.30950533133 1.19385342789598
32.3196171391755 1.43617021276596
32.3297289470211 1.40661938534279
32.3398407548666 1.40661938534279
32.3499525627121 1.32387706855792
32.3600643705577 1.38297872340426
32.3701761784032 1.49527186761229
32.3802879862487 1.24113475177305
32.3903997940943 1.34751773049645
32.4005116019398 1.44799054373522
32.4106234097853 1.24704491725768
32.4207352176309 1.46572104018913
32.4308470254764 1.25295508274232
32.4409588333219 1.26477541371158
32.4510706411675 1.22340425531915
32.461182449013 1.18203309692671
32.4712942568585 1.25886524822695
32.4814060647041 1.22340425531915
32.4915178725496 1.41252955082742
32.5016296803951 1.38888888888889
32.5117414882407 1.40070921985816
32.5218532960862 1.28841607565012
32.5319651039317 1.22931442080378
32.5420769117773 1.35342789598109
32.5521887196228 1.18794326241135
32.5623005274683 1.45981087470449
32.5724123353139 1.37706855791962
32.5825241431594 1.37115839243499
32.5926359510049 1.22931442080378
32.6027477588505 1.34160756501182
32.612859566696 1.31205673758865
32.6229713745415 1.21749408983452
32.6330831823871 1.25295508274232
32.6431949902326 1.55437352245863
32.6533067980781 1.18794326241135
32.6634186059237 1.21749408983452
32.6735304137692 1.26477541371158
32.6836422216147 1.24704491725768
32.6937540294603 1.32978723404255
32.7038658373058 1.29432624113475
32.7139776451513 1.43026004728132
32.7240894529969 1.34751773049645
32.7342012608424 1.50118203309693
32.7443130686879 1.26477541371158
32.7544248765334 1.33569739952719
32.764536684379 1.35933806146572
32.7746484922245 1.31796690307329
32.78476030007 1.32387706855792
32.7948721079156 1.22931442080378
32.8049839157611 1.41843971631206
32.8150957236066 1.40070921985816
32.8252075314522 1.33569739952719
32.8353193392977 1.38297872340426
32.8454311471432 1.24113475177305
32.8555429549888 1.39479905437352
32.8656547628343 1.50118203309693
32.8757665706798 1.41252955082742
32.8858783785254 1.38297872340426
32.8959901863709 1.28841607565012
32.9061019942164 1.24704491725768
32.916213802062 1.29432624113475
32.9263256099075 1.49527186761229
32.936437417753 1.31205673758865
32.9465492255986 1.31205673758865
32.9566610334441 1.29432624113475
32.9667728412896 1.32978723404255
32.9768846491352 1.43617021276596
32.9869964569807 1.38297872340426
32.9971082648262 1.29432624113475
33.0072200726718 1.33569739952719
33.0173318805173 1.15839243498818
33.0274436883628 1.24704491725768
33.0375554962084 1.35342789598109
33.0476673040539 1.35342789598109
33.0577791118994 1.55437352245863
33.067890919745 1.30023640661939
33.0780027275905 1.43026004728132
33.088114535436 1.37115839243499
33.0982263432816 1.40070921985816
33.1083381511271 1.47754137115839
33.1184499589726 1.41843971631206
33.1285617668182 1.43617021276596
33.1386735746637 1.34160756501182
33.1487853825092 1.34751773049645
33.1588971903548 1.43617021276596
33.1690089982003 1.47163120567376
33.1791208060458 1.38888888888889
33.1892326138914 1.28250591016548
33.1993444217369 1.20567375886525
33.2094562295824 1.23522458628842
33.219568037428 1.36524822695035
33.2296798452735 1.35342789598109
33.239791653119 1.32978723404255
33.2499034609646 1.31205673758865
33.2600152688101 1.31205673758865
33.2701270766556 1.38888888888889
33.2802388845012 1.5839243498818
33.2903506923467 1.40661938534279
33.3004625001922 1.44799054373522
33.3105743080378 1.20567375886525
33.3206861158833 1.33569739952719
33.3307979237288 1.38888888888889
33.3409097315744 1.30614657210402
33.3510215394199 1.57210401891253
33.3611333472654 1.43617021276596
33.371245155111 1.5661938534279
33.3813569629565 1.48345153664303
33.391468770802 1.57210401891253
33.4015805786476 1.31205673758865
33.4116923864931 1.38297872340426
33.4218041943386 1.40070921985816
33.4319160021842 1.52482269503546
33.4420278100297 1.45981087470449
33.4521396178752 1.34160756501182
33.4622514257208 1.36524822695035
33.4723632335663 1.30023640661939
33.4824750414118 1.34751773049645
33.4925868492574 1.43026004728132
33.5026986571029 1.43026004728132
33.5128104649484 1.18794326241135
33.5229222727939 1.30614657210402
33.5330340806395 1.36524822695035
33.543145888485 1.48936170212766
33.5532576963305 1.38297872340426
33.5633695041761 1.53073286052009
33.5734813120216 1.51891252955083
33.5835931198671 1.44799054373522
33.5937049277127 1.57801418439716
33.6038167355582 1.47754137115839
33.6139285434037 1.38888888888889
33.6240403512493 1.42434988179669
33.6341521590948 1.55437352245863
33.6442639669403 1.44799054373522
33.6543757747859 1.45390070921986
33.6644875826314 1.48936170212766
33.6745993904769 1.31205673758865
33.6847111983225 1.39479905437352
33.694823006168 1.48345153664303
33.7049348140135 1.53073286052009
33.7150466218591 1.50118203309693
33.7251584297046 1.57801418439716
33.7352702375501 1.40661938534279
33.7453820453957 1.55437352245863
33.7554938532412 1.39479905437352
33.7656056610867 1.58983451536643
33.7757174689323 1.44799054373522
33.7858292767778 1.61347517730496
33.7959410846233 1.55437352245863
33.8060528924689 1.43026004728132
33.8161647003144 1.5839243498818
33.8262765081599 1.34160756501182
33.8363883160055 1.41843971631206
33.846500123851 1.63120567375887
33.8566119316965 1.5839243498818
33.8667237395421 1.53073286052009
33.8768355473876 1.48345153664303
33.8869473552331 1.51300236406619
33.8970591630787 1.40070921985816
33.9071709709242 1.67848699763593
33.9172827787697 1.52482269503546
33.9273945866153 1.49527186761229
33.9375063944608 1.76713947990544
33.9476182023063 1.40661938534279
33.9577300101519 1.68439716312057
33.9678418179974 1.51300236406619
33.9779536258429 1.59574468085106
33.9880654336885 1.548463356974
33.998177241534 1.71394799054374
34.0082890493795 1.66666666666667
34.0184008572251 1.64893617021277
34.0285126650706 1.60756501182033
34.0386244729161 1.67848699763593
34.0487362807617 1.71985815602837
34.0588480886072 1.68439716312057
34.0689598964527 1.71985815602837
34.0790717042983 1.71394799054374
34.0891835121438 1.50709219858156
34.0992953199893 1.49527186761229
34.1094071278349 1.725768321513
34.1195189356804 1.5839243498818
34.1296307435259 1.64893617021277
34.1397425513715 1.5661938534279
34.149854359217 1.6016548463357
34.1599661670625 1.57801418439716
34.1700779749081 1.79078014184397
34.1801897827536 1.75531914893617
34.1903015905991 1.79669030732861
34.2004133984447 1.68439716312057
34.2105252062902 1.76713947990544
34.2206370141357 1.7789598108747
34.2307488219813 1.82624113475177
34.2408606298268 1.79078014184397
34.2509724376723 1.81442080378251
34.2610842455179 1.58983451536643
34.2711960533634 1.71394799054374
34.2813078612089 1.62529550827423
34.2914196690544 1.97399527186761
34.3015314769 1.87943262411348
34.3116432847455 1.82624113475177
34.321755092591 1.99763593380615
34.3318669004366 1.83806146572104
34.3419787082821 1.97399527186761
34.3520905161276 1.82624113475177
34.3622023239732 1.87943262411348
34.3723141318187 1.83806146572104
34.3824259396642 1.90307328605201
34.3925377475098 2.02718676122931
34.4026495553553 2.16903073286052
34.4127613632008 1.84397163120567
34.4228731710464 1.74940898345154
34.4329849788919 1.98581560283688
34.4430967867374 2.13356973995272
34.453208594583 2.03309692671395
34.4633204024285 1.87352245862884
34.473432210274 2.12174940898345
34.4835440181196 2.18085106382979
34.4936558259651 2.16312056737589
34.5037676338106 2.08628841607565
34.5138794416562 2.18676122931442
34.5239912495017 2.02718676122931
34.5341030573472 2.20449172576832
34.5442148651928 2.10992907801419
34.5543266730383 2.19858156028369
34.5644384808838 2.32269503546099
34.5745502887294 2.20449172576832
34.5846620965749 2.21631205673759
34.5947739044204 2.3936170212766
34.604885712266 2.31678486997636
34.6149975201115 2.39952718676123
34.625109327957 2.4645390070922
34.6352211358026 2.30496453900709
34.6453329436481 2.36997635933806
34.6554447514936 2.4290780141844
34.6655565593392 2.38179669030733
34.6756683671847 2.4822695035461
34.6857801750302 2.4113475177305
34.6958919828758 2.54137115839244
34.7060037907213 2.68912529550827
34.7161155985668 2.49408983451537
34.7262274064124 2.83687943262411
34.7363392142579 2.81323877068558
34.7464510221034 2.5709219858156
34.756562829949 2.58274231678487
34.7666746377945 2.50591016548463
34.77678644564 2.91962174940898
34.7868982534856 2.78959810874705
34.7970100613311 2.68321513002364
34.8071218691766 2.86052009456265
34.8172336770222 3.18557919621749
34.8273454848677 2.84869976359338
34.8374572927132 2.97872340425532
34.8475691005588 2.91371158392435
34.8576809084043 3.06146572104019
34.8677927162498 2.86052009456265
34.8779045240954 2.98463356973995
34.8880163319409 3.18557919621749
34.8981281397864 3.19148936170213
34.908239947632 3.04373522458629
34.9183517554775 3.26832151300236
34.928463563323 3.3096926713948
34.9385753711686 3.2919621749409
34.9486871790141 3.15011820330969
34.9587989868596 3.09101654846336
34.9689107947052 3.37470449172577
34.9790226025507 3.30378250591017
34.9891344103962 3.56382978723404
34.9992462182418 3.3096926713948
35.0093580260873 3.4338061465721
35.0194698339328 3.72931442080378
35.0295816417784 3.75886524822695
35.0396934496239 3.57565011820331
35.0498052574694 3.73522458628842
35.0599170653149 3.73522458628842
35.0700288731605 3.80023640661939
35.080140681006 3.94208037825059
35.0902524888515 3.78841607565012
35.1003642966971 3.95981087470449
35.1104761045426 4.11347517730497
35.1205879123881 3.91252955082742
35.1306997202337 4.1371158392435
35.1408115280792 3.85933806146572
35.1509233359247 4.16666666666667
35.1610351437703 4.29669030732861
35.1711469516158 4.21394799054374
35.1812587594613 4.24940898345154
35.1913705673069 4.12529550827423
35.2014823751524 4.19621749408984
35.2115941829979 4.36170212765957
35.2217059908435 4.32033096926714
35.231817798689 4.34988179669031
35.2419296065345 4.59219858156028
35.2520414143801 4.42080378250591
35.2621532222256 4.19621749408984
35.2722650300711 4.62174940898345
35.2823768379167 4.78132387706856
35.2924886457622 4.37943262411348
35.3026004536077 4.79314420803783
35.3127122614533 4.70449172576832
35.3228240692988 4.49172576832151
35.3329358771443 4.72222222222222
35.3430476849899 4.32624113475177
35.3531594928354 4.30851063829787
35.3632713006809 4.75177304964539
35.3733831085265 4.78132387706856
35.383494916372 4.84633569739953
35.3936067242175 4.50945626477541
35.4037185320631 4.9113475177305
35.4138303399086 4.66312056737589
35.4239421477541 4.70449172576832
35.4340539555997 4.95862884160757
35.4441657634452 4.78723404255319
35.4542775712907 5.0177304964539
35.4643893791363 4.76950354609929
35.4745011869818 4.71631205673759
35.4846129948273 4.66903073286052
35.4947248026729 4.83451536643026
35.5048366105184 5.15366430260047
35.5149484183639 5.31323877068558
35.5250602262095 5
35.535172034055 4.95271867612293
35.5452838419005 4.88770685579196
35.5553956497461 4.73404255319149
35.5655074575916 4.79905437352246
35.5756192654371 5.0354609929078
35.5857310732827 4.9822695035461
35.5958428811282 4.78132387706856
35.6059546889737 4.68676122931442
35.6160664968193 5.08274231678487
35.6261783046648 5.04137115839244
35.6362901125103 4.65130023640662
35.6464019203559 4.73404255319149
35.6565137282014 4.81678486997636
35.6666255360469 4.70449172576832
35.6767373438925 4.79314420803783
35.686849151738 4.75768321513003
35.6969609595835 4.81678486997636
35.7070727674291 4.56264775413712
35.7171845752746 4.64539007092199
35.7272963831201 4.36170212765957
35.7374081909657 4.72813238770686
35.7475199988112 4.73995271867612
35.7576318066567 4.31442080378251
35.7677436145023 4.67494089834516
35.7778554223478 4.47399527186761
35.7879672301933 4.59219858156028
35.7980790380389 4.62765957446809
35.8081908458844 4.70449172576832
35.8183026537299 4.72222222222222
35.8284144615754 4.37943262411348
35.838526269421 4.48581560283688
35.8486380772665 4.44444444444444
35.858749885112 4.46217494089835
35.8688616929576 4.55673758865248
35.8789735008031 4.36170212765957
35.8890853086486 4.52127659574468
35.8991971164942 4.225768321513
35.9093089243397 4.05437352245863
35.9194207321852 4.39716312056738
35.9295325400308 4.43853427895981
35.9396443478763 4.52718676122932
35.9497561557218 4.09574468085106
35.9598679635674 4.04255319148936
35.9699797714129 4.32033096926714
35.9800915792584 4.23167848699764
35.990203387104 3.98345153664303
36.0003151949495 3.76477541371158
36.010427002795 4.03664302600473
36.0205388106406 3.91252955082742
36.0306506184861 3.98345153664303
36.0407624263316 3.80023640661939
36.0508742341772 4.19621749408984
36.0609860420227 4.0661938534279
36.0710978498682 3.81796690307329
36.0812096577138 3.78250591016548
36.0913214655593 3.71749408983452
36.1014332734048 3.51654846335697
36.1115450812504 3.63475177304965
36.1216568890959 3.49881796690307
36.1317686969414 3.67021276595745
36.141880504787 3.49881796690307
36.1519923126325 3.44562647754137
36.162104120478 3.48108747044917
36.1722159283236 3.62293144208038
36.1823277361691 3.26241134751773
36.1924395440146 3.26832151300236
36.2025513518602 3.44562647754137
36.2126631597057 3.48108747044917
36.2227749675512 3.2565011820331
36.2328867753968 3.28014184397163
36.2429985832423 3.09692671394799
36.2531103910878 3.10283687943262
36.2632221989334 3.26241134751773
36.2733340067789 3.08510638297872
36.2834458146244 2.96690307328605
36.29355762247 3.00236406619385
36.3036694303155 3.00236406619385
36.313781238161 2.80141843971631
36.3238930460066 2.93735224586288
36.3340048538521 2.99054373522459
36.3441166616976 2.89007092198582
36.3542284695432 2.83096926713948
36.3643402773887 2.80732860520095
36.3744520852342 2.64775413711584
36.3845638930798 2.77186761229314
36.3946757009253 2.73640661938534
36.4047875087708 2.91371158392435
36.4148993166164 2.55910165484634
36.4250111244619 2.4290780141844
36.4351229323074 2.64184397163121
36.445234740153 2.4645390070922
36.4553465479985 2.5531914893617
36.465458355844 2.4468085106383
36.4755701636896 2.3581560283688
36.4856819715351 2.48817966903073
36.4957937793806 2.3936170212766
36.5059055872262 2.34042553191489
36.5160173950717 2.17494089834515
36.5261292029172 2.26359338061466
36.5362410107628 2.23404255319149
36.5463528186083 2.23995271867612
36.5564646264538 2.30496453900709
36.5665764342994 2.11583924349882
36.5766882421449 2.25177304964539
36.5868000499904 2.30496453900709
36.5969118578359 2.45271867612293
36.6070236656815 2.35224586288416
36.617135473527 2.14539007092199
36.6272472813725 2.29314420803783
36.6373590892181 2.09810874704492
36.6474708970636 2.16312056737589
36.6575827049091 2.11583924349882
36.6676945127547 2.08037825059102
36.6778063206002 1.97990543735225
36.6879181284457 2.28132387706856
36.6980299362913 1.99172576832151
36.7081417441368 1.86761229314421
36.7182535519823 1.98581560283688
36.7283653598279 1.86170212765957
36.7384771676734 2.02718676122931
36.7485889755189 1.90307328605201
36.7587007833645 1.83806146572104
36.76881259121 1.83806146572104
36.7789243990555 1.99763593380615
36.7890362069011 1.89125295508274
36.7991480147466 1.81442080378251
36.8092598225921 1.76713947990544
36.8193716304377 2.00945626477541
36.8294834382832 1.85579196217494
36.8395952461287 1.7612293144208
36.8497070539743 1.67848699763593
36.8598188618198 1.86170212765957
36.8699306696653 1.78486997635934
36.8800424775109 1.81442080378251
36.8901542853564 1.83215130023641
36.9002660932019 1.57210401891253
36.9103779010475 1.87943262411348
36.920489708893 1.74940898345154
36.9306015167385 1.7434988179669
36.9407133245841 1.73758865248227
36.9508251324296 1.6725768321513
36.9609369402751 1.76713947990544
36.9710487481207 1.61347517730496
36.9811605559662 1.6548463356974
36.9912723638117 1.67848699763593
37.0013841716573 1.64893617021277
37.0114959795028 1.79078014184397
37.0216077873483 1.6548463356974
37.0317195951939 1.85579196217494
37.0418314030394 1.79669030732861
37.0519432108849 1.50709219858156
37.0620550187305 1.57210401891253
37.072166826576 1.51300236406619
37.0822786344215 1.45981087470449
37.0923904422671 1.40661938534279
37.1025022501126 1.50709219858156
37.1126140579581 1.50709219858156
37.1227258658037 1.48936170212766
37.1328376736492 1.40661938534279
37.1429494814947 1.6725768321513
37.1530612893403 1.41843971631206
37.1631730971858 1.42434988179669
37.1732849050313 1.40070921985816
37.1833967128769 1.40661938534279
37.1935085207224 1.51300236406619
37.2036203285679 1.67848699763593
37.2137321364135 1.35933806146572
37.223843944259 1.30023640661939
37.2339557521045 1.38297872340426
37.2440675599501 1.51300236406619
37.2541793677956 1.41252955082742
37.2642911756411 1.58983451536643
37.2744029834867 1.40661938534279
37.2845147913322 1.59574468085106
37.2946265991777 1.34751773049645
37.3047384070233 1.48936170212766
37.3148502148688 1.44799054373522
37.3249620227143 1.45981087470449
37.3350738305599 1.50118203309693
37.3451856384054 1.51891252955083
37.3552974462509 1.41843971631206
37.3654092540964 1.47754137115839
37.375521061942 1.41252955082742
37.3856328697875 1.34751773049645
37.395744677633 1.37115839243499
37.4058564854786 1.40070921985816
37.4159682933241 1.38297872340426
37.4260801011696 1.35342789598109
37.4361919090152 1.48345153664303
37.4463037168607 1.36524822695035
37.4564155247062 1.25295508274232
37.4665273325518 1.26477541371158
37.4766391403973 1.30614657210402
37.4867509482428 1.31205673758865
37.4968627560884 1.31205673758865
37.5069745639339 1.38888888888889
37.5170863717794 1.28841607565012
37.527198179625 1.30023640661939
37.5373099874705 1.31796690307329
37.547421795316 1.28841607565012
37.5575336031616 1.14657210401891
37.5676454110071 1.22340425531915
37.5777572188526 1.17612293144208
37.5878690266982 1.18794326241135
37.5979808345437 1.40070921985816
37.6080926423892 1.30023640661939
37.6182044502348 1.37115839243499
37.6283162580803 1.25886524822695
37.6384280659258 1.30614657210402
37.6485398737714 1.32978723404255
37.6586516816169 1.20567375886525
37.6687634894624 1.25295508274232
37.678875297308 1.19385342789598
37.6889871051535 1.19385342789598
37.699098912999 1.22931442080378
37.7092107208446 1.24113475177305
37.7193225286901 1.00472813238771
37.7294343365356 1.25886524822695
37.7395461443812 1.14657210401891
37.7496579522267 1.09338061465721
37.7597697600722 1.25886524822695
37.7698815679178 1.07565011820331
37.7799933757633 1.13475177304965
37.7901051836088 1.19976359338061
37.8002169914544 1.12293144208038
37.8103287992999 1.31205673758865
37.8204406071454 1.31796690307329
37.830552414991 1.24113475177305
37.8406642228365 1.19385342789598
37.850776030682 1.09338061465721
37.8608878385276 1.07565011820331
37.8709996463731 1.31796690307329
37.8811114542186 1.28841607565012
37.8912232620642 1.20567375886525
37.9013350699097 1.15248226950355
37.9114468777552 1.19385342789598
37.9215586856008 1.27068557919622
37.9316704934463 1.39479905437352
37.9417823012918 1.18203309692671
37.9518941091374 1.20567375886525
37.9620059169829 1.09338061465721
37.9721177248284 1.12884160756501
37.982229532674 1.19976359338061
37.9923413405195 1.26477541371158
38.002453148365 0.986997635933806
38.0125649562106 1.14657210401891
38.0226767640561 1.16430260047281
38.0327885719016 1.12293144208038
38.0429003797472 1.08156028368794
38.0530121875927 1.06382978723404
38.0631239954382 1.04609929078014
38.0732358032838 1.28250591016548
38.0833476111293 1.14657210401891
38.0934594189748 1.11702127659575
38.1035712268204 1.11111111111111
38.1136830346659 1.09929078014184
38.1237948425114 1.12293144208038
38.1339066503569 1.14657210401891
38.1440184582025 1.18203309692671
38.154130266048 1.04609929078014
38.1642420738935 0.951536643026005
38.1743538817391 1.21158392434988
38.1844656895846 0.986997635933806
38.1945774974301 1.12884160756501
38.2046893052757 1.03427895981087
38.2148011131212 1.21158392434988
38.2249129209667 1.19385342789598
38.2350247288123 1.14066193853428
38.2451365366578 1.12293144208038
38.2552483445033 0.975177304964539
38.2653601523489 1.09338061465721
38.2754719601944 1.01063829787234
38.2855837680399 1.12293144208038
38.2956955758855 0.986997635933806
38.305807383731 1.24704491725768
38.3159191915765 1.01654846335697
38.3260309994221 1.09338061465721
38.3361428072676 1.04609929078014
38.3462546151131 0.933806146572104
38.3563664229587 0.998817966903074
38.3664782308042 0.986997635933806
38.3765900386497 0.945626477541371
38.3867018464953 0.880614657210402
38.3968136543408 1.05791962174941
38.4069254621863 0.957446808510638
38.4170372700319 1.07565011820331
38.4271490778774 1.14066193853428
38.4372608857229 1.05200945626478
38.4473726935685 0.998817966903074
38.457484501414 1.04609929078014
38.4675963092595 0.986997635933806
38.4777081171051 1.22931442080378
38.4878199249506 1.14657210401891
38.4979317327961 1.05200945626478
38.5080435406417 0.933806146572104
38.5181553484872 0.939716312056738
38.5282671563327 1.04018912529551
38.5383789641783 1.06973995271868
38.5484907720238 1.00472813238771
38.5586025798693 1.09338061465721
38.5687143877149 1.06973995271868
38.5788261955604 1.07565011820331
38.5889380034059 0.975177304964539
38.5990498112515 1.05791962174941
38.609161619097 0.99290780141844
38.6192734269425 0.886524822695036
38.6293852347881 0.969267139479906
38.6394970426336 1.04609929078014
38.6496088504791 1.08747044917258
38.6597206583247 1.02836879432624
38.6698324661702 0.886524822695036
38.6799442740157 1.09338061465721
38.6900560818613 0.998817966903074
38.7001678897068 1.01063829787234
38.7102796975523 1.03427895981087
38.7203915053979 0.868794326241135
38.7305033132434 1.02245862884161
38.7406151210889 1.01063829787234
38.7507269289345 1.08156028368794
38.76083873678 1.17612293144208
38.7709505446255 1.06973995271868
38.7810623524711 0.839243498817967
38.7911741603166 1.04609929078014
38.8012859681621 1.08747044917258
38.8113977760077 0.998817966903074
38.8215095838532 1.14066193853428
38.8316213916987 0.986997635933806
38.8417331995443 1.02245862884161
38.8518450073898 0.969267139479906
38.8619568152353 1.01654846335697
38.8720686230809 0.975177304964539
38.8821804309264 1.06382978723404
38.8922922387719 1.09338061465721
38.9024040466174 0.939716312056738
38.912515854463 0.975177304964539
38.9226276623085 1.08747044917258
38.932739470154 1.02836879432624
38.9428512779996 1.01654846335697
38.9529630858451 1.00472813238771
38.9630748936906 0.933806146572104
38.9731867015362 1.01654846335697
38.9832985093817 1.01063829787234
38.9934103172272 0.927895981087471
39.0035221250728 1.02836879432624
39.0136339329183 1.11702127659575
39.0237457407638 1.03427895981087
39.0338575486094 0.8274231678487
39.0439693564549 0.981087470449173
39.0540811643004 1.11111111111111
39.064192972146 1.00472813238771
39.0743047799915 0.839243498817967
39.084416587837 1.01654846335697
39.0945283956826 1.09929078014184
39.1046402035281 0.998817966903074
39.1147520113736 0.975177304964539
39.1248638192192 0.945626477541371
39.1349756270647 0.99290780141844
39.1450874349102 0.99290780141844
39.1551992427558 0.933806146572104
39.1653110506013 0.939716312056738
39.1754228584468 0.927895981087471
39.1855346662924 0.998817966903074
39.1956464741379 0.856973995271868
39.2057582819834 0.921985815602837
39.215870089829 1.02245862884161
39.2259818976745 0.957446808510638
39.23609370552 0.963356973995272
39.2462055133656 1.03427895981087
39.2563173212111 0.99290780141844
39.2664291290566 0.951536643026005
39.2765409369022 1.06382978723404
39.2866527447477 1.05791962174941
39.2967645525932 1.02245862884161
39.3068763604388 0.975177304964539
39.3169881682843 0.892434988179669
39.3270999761298 0.963356973995272
39.3372117839754 0.975177304964539
39.3473235918209 0.963356973995272
39.3574353996664 0.868794326241135
39.367547207512 0.921985815602837
39.3776590153575 0.916075650118204
39.387770823203 0.786052009456265
39.3978826310486 1.06382978723404
39.4079944388941 1.01654846335697
39.4181062467396 1.00472813238771
39.4282180545852 0.786052009456265
39.4383298624307 0.969267139479906
39.4484416702762 1.01654846335697
39.4585534781218 1.04609929078014
39.4686652859673 0.945626477541371
39.4787770938128 0.939716312056738
39.4888889016584 1.01063829787234
39.4990007095039 1.04609929078014
39.5091125173494 1.06973995271868
39.519224325195 1.01063829787234
39.5293361330405 1.05791962174941
39.539447940886 0.981087470449173
39.5495597487316 0.892434988179669
39.5596715565771 0.839243498817967
39.5697833644226 0.904255319148936
39.5798951722682 0.986997635933806
39.5900069801137 0.939716312056738
39.6001187879592 0.851063829787234
39.6102305958048 0.963356973995272
39.6203424036503 0.927895981087471
39.6304542114958 1.08156028368794
39.6405660193414 0.904255319148936
39.6506778271869 0.780141843971631
39.6607896350324 0.839243498817967
39.6709014428779 0.91016548463357
39.6810132507235 0.957446808510638
39.691125058569 0.998817966903074
39.7012368664145 0.951536643026005
39.7113486742601 0.963356973995272
39.7214604821056 0.927895981087471
39.7315722899511 0.874704491725768
39.7416840977967 0.8274231678487
39.7517959056422 0.998817966903074
39.7619077134877 1.09338061465721
39.7720195213333 0.833333333333333
39.7821313291788 0.851063829787234
39.7922431370243 0.969267139479906
39.8023549448699 0.892434988179669
39.8124667527154 0.975177304964539
39.8225785605609 0.833333333333333
39.8326903684065 0.939716312056738
39.842802176252 0.874704491725768
39.8529139840975 0.951536643026005
39.8630257919431 0.957446808510638
39.8731375997886 1.04609929078014
39.8832494076341 1.08747044917258
39.8933612154797 0.939716312056738
39.9034730233252 0.851063829787234
39.9135848311707 0.892434988179669
39.9236966390163 0.904255319148936
39.9338084468618 0.981087470449173
39.9439202547073 1.00472813238771
39.9540320625529 0.975177304964539
39.9641438703984 0.933806146572104
39.9742556782439 0.91016548463357
39.9843674860895 1.00472813238771
39.994479293935 0.921985815602837
40.0045911017805 0.945626477541371
40.0147029096261 0.851063829787234
40.0248147174716 0.921985815602837
40.0349265253171 0.91016548463357
40.0450383331627 1.05791962174941
40.0551501410082 0.986997635933806
40.0652619488537 0.927895981087471
40.0753737566993 0.945626477541371
40.0854855645448 0.975177304964539
40.0955973723903 0.851063829787234
40.1057091802359 0.856973995271868
40.1158209880814 0.951536643026005
40.1259327959269 0.8274231678487
40.1360446037725 0.91016548463357
40.146156411618 1.04018912529551
40.1562682194635 1.06382978723404
40.1663800273091 0.99290780141844
40.1764918351546 0.732860520094563
40.1866036430001 0.845153664302601
40.1967154508457 0.986997635933806
40.2068272586912 0.892434988179669
40.2169390665367 0.839243498817967
40.2270508743823 0.91016548463357
40.2371626822278 0.845153664302601
40.2472744900733 0.839243498817967
40.2573862979189 0.951536643026005
40.2674981057644 1.01063829787234
40.2776099136099 1.01063829787234
40.2877217214555 0.998817966903074
40.297833529301 0.916075650118204
40.3079453371465 0.898345153664303
40.3180571449921 0.921985815602837
40.3281689528376 0.921985815602837
40.3382807606831 0.892434988179669
40.3483925685287 0.851063829787234
40.3585043763742 0.8274231678487
40.3686161842197 0.880614657210402
40.3787279920653 0.933806146572104
40.3888397999108 0.833333333333333
40.3989516077563 0.786052009456265
40.4090634156019 0.868794326241135
40.4191752234474 0.933806146572104
40.4292870312929 0.927895981087471
40.4393988391384 0.951536643026005
40.449510646984 0.898345153664303
40.4596224548295 0.8274231678487
40.469734262675 1.04018912529551
40.4798460705206 0.898345153664303
40.4899578783661 0.856973995271868
40.5000696862116 1.04609929078014
40.5101814940572 0.921985815602837
40.5202933019027 0.898345153664303
40.5304051097482 0.969267139479906
40.5405169175938 0.880614657210402
40.5506287254393 0.904255319148936
40.5607405332848 0.904255319148936
40.5708523411304 1.02245862884161
40.5809641489759 1.00472813238771
40.5910759568214 0.91016548463357
40.601187764667 0.803782505910166
40.6112995725125 0.868794326241135
40.621411380358 0.886524822695036
40.6315231882036 0.904255319148936
40.6416349960491 0.91016548463357
40.6517468038946 1.04018912529551
40.6618586117402 0.969267139479906
40.6719704195857 0.91016548463357
40.6820822274312 1.07565011820331
40.6921940352768 0.874704491725768
40.7023058431223 1.04018912529551
40.7124176509678 0.986997635933806
40.7225294588134 1.04609929078014
40.7326412666589 0.951536643026005
40.7427530745044 0.904255319148936
40.75286488235 1.05200945626478
40.7629766901955 1.06382978723404
40.773088498041 0.939716312056738
40.7832003058866 0.721040189125296
40.7933121137321 0.851063829787234
40.8034239215776 0.975177304964539
40.8135357294232 0.957446808510638
40.8236475372687 1.06382978723404
40.8337593451142 0.916075650118204
40.8438711529598 0.91016548463357
40.8539829608053 0.833333333333333
40.8640947686508 0.945626477541371
40.8742065764964 0.856973995271868
40.8843183843419 1.00472813238771
40.8944301921874 0.969267139479906
40.904542000033 0.904255319148936
40.9146538078785 0.921985815602837
40.924765615724 0.874704491725768
40.9348774235696 0.833333333333333
40.9449892314151 1.01654846335697
40.9551010392606 0.933806146572104
40.9652128471062 0.921985815602837
40.9753246549517 0.99290780141844
40.9854364627972 0.975177304964539
40.9955482706428 0.821513002364066
41.0056600784883 0.921985815602837
41.0157718863338 0.803782505910166
41.0258836941794 0.815602836879433
41.0359955020249 1.09338061465721
41.0461073098704 0.963356973995272
41.056219117716 0.874704491725768
41.0663309255615 0.933806146572104
41.076442733407 1.02836879432624
41.0865545412526 0.774231678486998
41.0966663490981 0.986997635933806
41.1067781569436 0.99290780141844
41.1168899647892 0.951536643026005
41.1270017726347 0.916075650118204
41.1371135804802 0.975177304964539
41.1472253883258 1.01063829787234
41.1573371961713 0.904255319148936
41.1674490040168 0.8274231678487
41.1775608118624 0.868794326241135
41.1876726197079 0.927895981087471
41.1977844275534 0.856973995271868
41.2078962353989 1.03427895981087
41.2180080432445 0.845153664302601
41.22811985109 0.821513002364066
41.2382316589355 0.8274231678487
41.2483434667811 0.904255319148936
41.2584552746266 0.839243498817967
41.2685670824721 0.921985815602837
41.2786788903177 0.927895981087471
41.2887906981632 0.898345153664303
41.2989025060087 0.851063829787234
41.3090143138543 0.856973995271868
41.3191261216998 0.933806146572104
41.3292379295453 0.815602836879433
41.3393497373909 0.927895981087471
41.3494615452364 0.916075650118204
41.3595733530819 0.892434988179669
41.3696851609275 1.04018912529551
41.379796968773 0.957446808510638
41.3899087766185 0.933806146572104
41.4000205844641 0.892434988179669
41.4101323923096 1.00472813238771
41.4202442001551 0.951536643026005
41.4303560080007 1.02245862884161
41.4404678158462 0.921985815602837
41.4505796236917 0.933806146572104
41.4606914315373 0.91016548463357
41.4708032393828 1.04609929078014
41.4809150472283 1.03427895981087
41.4910268550739 0.99290780141844
41.5011386629194 0.99290780141844
41.5112504707649 0.927895981087471
41.5213622786105 0.904255319148936
41.531474086456 0.904255319148936
41.5415858943015 0.957446808510638
41.5516977021471 0.981087470449173
41.5618095099926 0.951536643026005
41.5719213178381 0.91016548463357
41.5820331256837 1.11702127659575
41.5921449335292 0.856973995271868
41.6022567413747 0.957446808510638
41.6123685492203 0.916075650118204
41.6224803570658 0.969267139479906
41.6325921649113 1.02245862884161
41.6427039727569 0.945626477541371
41.6528157806024 0.945626477541371
41.6629275884479 1.01654846335697
41.6730393962935 0.874704491725768
41.683151204139 0.886524822695036
41.6932630119845 0.927895981087471
41.7033748198301 0.880614657210402
41.7134866276756 0.951536643026005
41.7235984355211 1.11702127659575
41.7337102433667 0.933806146572104
41.7438220512122 1.05791962174941
41.7539338590577 0.986997635933806
41.7640456669033 1.01063829787234
41.7741574747488 0.868794326241135
41.7842692825943 0.904255319148936
41.7943810904399 1.04018912529551
41.8044928982854 1.01063829787234
41.8146047061309 0.981087470449173
41.8247165139765 0.862884160756501
41.834828321822 1.10520094562648
41.8449401296675 1.04609929078014
41.8550519375131 1.00472813238771
41.8651637453586 0.862884160756501
41.8752755532041 1.07565011820331
41.8853873610497 0.845153664302601
41.8954991688952 1.02245862884161
41.9056109767407 1.08156028368794
41.9157227845863 1.04018912529551
41.9258345924318 0.927895981087471
41.9359464002773 1.03427895981087
41.9460582081228 1.15839243498818
41.9561700159684 1.06973995271868
41.9662818238139 1.01654846335697
41.9763936316594 1.03427895981087
41.986505439505 0.921985815602837
41.9966172473505 0.868794326241135
42.006729055196 1.04609929078014
42.0168408630416 0.833333333333333
42.0269526708871 1.14657210401891
42.0370644787326 0.856973995271868
42.0471762865782 1.09338061465721
42.0572880944237 1.03427895981087
42.0673999022692 1.03427895981087
42.0775117101148 1.05200945626478
42.0876235179603 0.957446808510638
42.0977353258058 0.998817966903074
42.1078471336514 0.998817966903074
42.1179589414969 0.986997635933806
42.1280707493424 0.892434988179669
42.138182557188 1.06973995271868
42.1482943650335 0.963356973995272
42.158406172879 0.957446808510638
42.1685179807246 1.06382978723404
42.1786297885701 1.16430260047281
42.1887415964156 1.08747044917258
42.1988534042612 0.998817966903074
42.2089652121067 0.886524822695036
42.2190770199522 1.01654846335697
42.2291888277978 1.01063829787234
42.2393006356433 1.03427895981087
42.2494124434888 1.09929078014184
42.2595242513344 1.18794326241135
42.2696360591799 1.14066193853428
42.2797478670254 1.14066193853428
42.289859674871 1.18203309692671
42.2999714827165 0.939716312056738
42.310083290562 1.05791962174941
42.3201950984076 1.11111111111111
42.3303069062531 1.22340425531915
42.3404187140986 1.02245862884161
42.3505305219442 1.17612293144208
42.3606423297897 1.03427895981087
42.3707541376352 1.09338061465721
42.3808659454808 1.12884160756501
42.3909777533263 1.19385342789598
42.4010895611718 0.998817966903074
42.4112013690174 1.06382978723404
42.4213131768629 1.20567375886525
42.4314249847084 1.14066193853428
42.441536792554 1.22931442080378
42.4516486003995 1.18794326241135
42.461760408245 1.22931442080378
42.4718722160906 1.11111111111111
42.4819840239361 1.22340425531915
42.4920958317816 1.24113475177305
42.5022076396272 1.15839243498818
42.5123194474727 1.16430260047281
42.5224312553182 1.37115839243499
42.5325430631638 1.22931442080378
42.5426548710093 1.15839243498818
42.5527666788548 1.12884160756501
42.5628784867004 1.18203309692671
42.5729902945459 1.30023640661939
42.5831021023914 1.17612293144208
42.593213910237 1.14657210401891
42.6033257180825 1.20567375886525
42.613437525928 1.24704491725768
42.6235493337736 1.33569739952719
42.6336611416191 1.30614657210402
42.6437729494646 1.37706855791962
42.6538847573102 1.29432624113475
42.6639965651557 1.27659574468085
42.6741083730012 1.27068557919622
42.6842201808468 1.27659574468085
42.6943319886923 1.18203309692671
42.7044437965378 1.14066193853428
42.7145556043833 1.27068557919622
42.7246674122289 1.32978723404255
42.7347792200744 1.44208037825059
42.7448910279199 1.14066193853428
42.7550028357655 1.15839243498818
42.765114643611 1.27659574468085
42.7752264514565 1.45390070921986
42.7853382593021 1.36524822695035
42.7954500671476 1.34160756501182
42.8055618749931 1.45390070921986
42.8156736828387 1.30023640661939
42.8257854906842 1.39479905437352
42.8358972985297 1.34160756501182
42.8460091063753 1.53664302600473
42.8561209142208 1.44799054373522
42.8662327220663 1.53073286052009
42.8763445299119 1.45390070921986
42.8864563377574 1.66075650118203
42.8965681456029 1.44208037825059
42.9066799534485 1.37706855791962
42.916791761294 1.41843971631206
42.9269035691395 1.38888888888889
42.9370153769851 1.48936170212766
42.9471271848306 1.55437352245863
42.9572389926761 1.47754137115839
42.9673508005217 1.36524822695035
42.9774626083672 1.51891252955083
42.9875744162127 1.41843971631206
42.9976862240583 1.28250591016548
43.0077980319038 1.44208037825059
43.0179098397493 1.50118203309693
43.0280216475949 1.63120567375887
43.0381334554404 1.6016548463357
43.0482452632859 1.35933806146572
43.0583570711315 1.64302600472813
43.068468878977 1.42434988179669
43.0785806868225 1.49527186761229
43.0886924946681 1.6016548463357
43.0988043025136 1.62529550827423
43.1089161103591 1.64893617021277
43.1190279182047 1.62529550827423
43.1291397260502 1.41843971631206
43.1392515338957 1.44208037825059
43.1493633417413 1.47163120567376
43.1594751495868 1.51300236406619
43.1695869574323 1.47163120567376
43.1796987652779 1.49527186761229
43.1898105731234 1.548463356974
43.1999223809689 1.60756501182033
43.2100341888145 1.64893617021277
43.22014599666 1.55437352245863
43.2302578045055 1.48345153664303
43.2403696123511 1.55437352245863
43.2504814201966 1.43617021276596
43.2605932280421 1.70212765957447
43.2707050358877 1.73167848699764
43.2808168437332 1.67848699763593
43.2909286515787 1.53664302600473
43.3010404594243 1.51300236406619
43.3111522672698 1.51891252955083
43.3212640751153 1.49527186761229
43.3313758829609 1.49527186761229
43.3414876908064 1.45981087470449
43.3515994986519 1.63120567375887
43.3617113064975 1.57210401891253
43.371823114343 1.63120567375887
43.3819349221885 1.548463356974
43.3920467300341 1.6193853427896
43.4021585378796 1.35342789598109
43.4122703457251 1.41843971631206
43.4223821535707 1.6193853427896
43.4324939614162 1.61347517730496
43.4426057692617 1.34751773049645
43.4527175771073 1.57801418439716
43.4628293849528 1.5839243498818
43.4729411927983 1.45390070921986
43.4830530006438 1.50118203309693
43.4931648084894 1.26477541371158
43.5032766163349 1.48345153664303
43.5133884241804 1.27659574468085
43.523500232026 1.46572104018913
43.5336120398715 1.5839243498818
43.543723847717 1.50709219858156
43.5538356555626 1.35933806146572
43.5639474634081 1.41843971631206
43.5740592712536 1.51891252955083
43.5841710790992 1.49527186761229
43.5942828869447 1.40070921985816
43.6043946947902 1.45981087470449
43.6145065026358 1.39479905437352
43.6246183104813 1.25886524822695
43.6347301183268 1.45390070921986
43.6448419261724 1.50709219858156
43.6549537340179 1.34160756501182
43.6650655418634 1.44208037825059
43.675177349709 1.37115839243499
43.6852891575545 1.50118203309693
43.6954009654 1.36524822695035
43.7055127732456 1.48936170212766
43.7156245810911 1.35342789598109
43.7257363889366 1.41252955082742
43.7358481967822 1.40070921985816
43.7459600046277 1.44208037825059
43.7560718124732 1.18203309692671
43.7661836203188 1.33569739952719
43.7762954281643 1.18794326241135
43.7864072360098 1.35933806146572
43.7965190438554 1.21158392434988
43.8066308517009 1.35342789598109
43.8167426595464 1.18203309692671
43.826854467392 1.17021276595745
43.8369662752375 1.21158392434988
43.847078083083 1.33569739952719
43.8571898909286 1.15248226950355
43.8673016987741 1.21158392434988
43.8774135066196 1.28250591016548
43.8875253144652 1.15839243498818
43.8976371223107 1.22340425531915
43.9077489301562 1.25886524822695
43.9178607380018 1.23522458628842
43.9279725458473 1.25295508274232
43.9380843536928 1.21749408983452
43.9481961615384 1.16430260047281
43.9583079693839 1.16430260047281
43.9684197772294 1.24113475177305
43.978531585075 1.21158392434988
43.9886433929205 1.13475177304965
43.998755200766 1.02836879432624
44.0088670086116 1.23522458628842
44.0189788164571 1.08747044917258
44.0290906243026 1.11702127659575
44.0392024321482 1.21158392434988
44.0493142399937 1.12293144208038
44.0594260478392 1.10520094562648
44.0695378556848 1.09338061465721
44.0796496635303 1.10520094562648
44.0897614713758 1.04018912529551
44.0998732792214 1.11702127659575
44.1099850870669 0.933806146572104
44.1200968949124 1.14657210401891
44.130208702758 1.08747044917258
44.1403205106035 1.22931442080378
44.150432318449 0.921985815602837
44.1605441262946 1.01063829787234
44.1706559341401 1.03427895981087
44.1807677419856 1.13475177304965
44.1908795498312 1.14066193853428
44.2009913576767 0.998817966903074
44.2111031655222 1.16430260047281
44.2212149733678 1.00472813238771
44.2313267812133 1.05791962174941
44.2414385890588 1.04609929078014
44.2515503969043 1.05791962174941
44.2616622047499 1.15248226950355
44.2717740125954 1.01063829787234
44.2818858204409 1.04609929078014
44.2919976282865 1.04609929078014
44.302109436132 1.06973995271868
44.3122212439775 0.99290780141844
44.3223330518231 0.927895981087471
44.3324448596686 0.957446808510638
44.3425566675141 1.01063829787234
44.3526684753597 1.02836879432624
44.3627802832052 0.975177304964539
44.3728920910507 0.921985815602837
44.3830038988963 0.927895981087471
44.3931157067418 0.916075650118204
44.4032275145873 0.951536643026005
44.4133393224329 1.02836879432624
44.4234511302784 1.01063829787234
44.4335629381239 1.01654846335697
44.4436747459695 0.815602836879433
44.453786553815 0.963356973995272
44.4638983616605 0.945626477541371
44.4740101695061 0.886524822695036
44.4841219773516 0.945626477541371
44.4942337851971 0.986997635933806
44.5043455930427 0.951536643026005
44.5144574008882 1.05791962174941
44.5245692087337 0.851063829787234
44.5346810165793 0.862884160756501
44.5447928244248 0.868794326241135
44.5549046322703 0.921985815602837
44.5650164401159 0.986997635933806
44.5751282479614 0.975177304964539
44.5852400558069 0.845153664302601
44.5953518636525 0.998817966903074
44.605463671498 0.892434988179669
44.6155754793435 0.998817966903074
44.6256872871891 0.780141843971631
44.6357990950346 0.916075650118204
44.6459109028801 0.845153664302601
44.6560227107257 0.815602836879433
44.6661345185712 0.845153664302601
44.6762463264167 0.969267139479906
44.6863581342623 0.721040189125296
44.6964699421078 0.862884160756501
44.7065817499533 0.886524822695036
44.7166935577989 0.839243498817967
44.7268053656444 0.898345153664303
44.7369171734899 0.815602836879433
44.7470289813355 0.933806146572104
44.757140789181 0.951536643026005
44.7672525970265 0.839243498817967
44.7773644048721 0.809692671394799
44.7874762127176 0.815602836879433
44.7975880205631 0.821513002364066
44.8076998284087 0.839243498817967
44.8178116362542 0.851063829787234
44.8279234440997 0.851063829787234
44.8380352519453 0.998817966903074
44.8481470597908 0.969267139479906
44.8582588676363 0.803782505910166
44.8683706754819 0.892434988179669
44.8784824833274 0.856973995271868
44.8885942911729 0.933806146572104
44.8987060990185 0.74468085106383
44.908817906864 0.856973995271868
44.9189297147095 1.06382978723404
44.9290415225551 0.933806146572104
44.9391533304006 0.856973995271868
44.9492651382461 0.815602836879433
44.9593769460917 0.809692671394799
44.9694887539372 0.774231678486998
44.9796005617827 0.898345153664303
44.9897123696283 0.74468085106383
44.9998241774738 0.880614657210402
45.0099359853193 0.927895981087471
45.0200477931648 0.851063829787234
45.0301596010104 0.975177304964539
45.0402714088559 0.880614657210402
45.0503832167014 0.886524822695036
45.060495024547 0.756501182033097
45.0706068323925 0.845153664302601
45.080718640238 0.809692671394799
45.0908304480836 0.862884160756501
45.1009422559291 0.851063829787234
45.1110540637746 0.845153664302601
45.1211658716202 0.904255319148936
45.1312776794657 0.874704491725768
45.1413894873112 1.00472813238771
45.1515012951568 0.821513002364066
45.1616131030023 0.921985815602837
45.1717249108478 0.839243498817967
45.1818367186934 0.904255319148936
45.1919485265389 0.898345153664303
45.2020603343844 0.703309692671395
45.21217214223 0.892434988179669
45.2222839500755 0.874704491725768
45.232395757921 0.975177304964539
45.2425075657666 0.768321513002364
45.2526193736121 0.845153664302601
45.2627311814576 0.780141843971631
45.2728429893032 0.768321513002364
45.2829547971487 0.803782505910166
45.2930666049942 0.703309692671395
45.3031784128398 0.868794326241135
45.3132902206853 0.868794326241135
45.3234020285308 0.880614657210402
45.3335138363764 0.851063829787234
45.3436256442219 0.886524822695036
45.3537374520674 0.774231678486998
45.363849259913 0.839243498817967
45.3739610677585 0.886524822695036
45.384072875604 0.756501182033097
45.3941846834496 0.780141843971631
45.4042964912951 0.797872340425532
45.4144082991406 0.780141843971631
45.4245201069862 0.892434988179669
45.4346319148317 0.679669030732861
45.4447437226772 0.774231678486998
45.4548555305228 0.762411347517731
45.4649673383683 0.750591016548463
45.4750791462138 0.851063829787234
45.4851909540594 0.845153664302601
45.4953027619049 0.762411347517731
45.5054145697504 0.721040189125296
45.515526377596 0.786052009456265
45.5256381854415 0.921985815602837
45.535749993287 0.815602836879433
45.5458618011326 0.851063829787234
45.5559736089781 0.880614657210402
45.5660854168236 0.797872340425532
45.5761972246692 0.815602836879433
45.5863090325147 0.703309692671395
45.5964208403602 0.851063829787234
45.6065326482058 0.862884160756501
45.6166444560513 0.721040189125296
45.6267562638968 0.856973995271868
45.6368680717424 0.774231678486998
45.6469798795879 0.815602836879433
45.6570916874334 0.845153664302601
45.667203495279 0.845153664302601
45.6773153031245 0.892434988179669
45.68742711097 0.809692671394799
45.6975389188156 0.797872340425532
45.7076507266611 0.809692671394799
45.7177625345066 0.768321513002364
45.7278743423522 0.862884160756501
45.7379861501977 0.756501182033097
45.7480979580432 0.856973995271868
45.7582097658888 0.738770685579196
45.7683215737343 0.833333333333333
45.7784333815798 0.833333333333333
45.7885451894253 0.673758865248227
45.7986569972709 0.8274231678487
45.8087688051164 0.703309692671395
45.8188806129619 0.862884160756501
45.8289924208075 0.685579196217494
45.839104228653 0.833333333333333
45.8492160364985 0.815602836879433
45.8593278443441 0.768321513002364
45.8694396521896 0.821513002364066
45.8795514600351 0.791962174940898
45.8896632678807 0.845153664302601
45.8997750757262 0.845153664302601
45.9098868835717 0.815602836879433
45.9199986914173 0.868794326241135
45.9301104992628 0.8274231678487
45.9402223071083 0.774231678486998
45.9503341149539 0.750591016548463
45.9604459227994 0.815602836879433
45.9705577306449 0.715130023640662
45.9806695384905 0.768321513002364
45.990781346336 0.862884160756501
46.0008931541815 0.856973995271868
46.0110049620271 0.756501182033097
46.0211167698726 0.880614657210402
46.0312285777181 0.833333333333333
46.0413403855637 0.8274231678487
46.0514521934092 0.762411347517731
46.0615640012547 0.8274231678487
46.0716758091003 0.791962174940898
46.0817876169458 0.868794326241135
46.0918994247913 0.697399527186761
46.1020112326369 0.874704491725768
46.1121230404824 0.874704491725768
46.1222348483279 0.756501182033097
46.1323466561735 0.791962174940898
46.142458464019 0.797872340425532
46.1525702718645 0.738770685579196
46.1626820797101 0.851063829787234
46.1727938875556 0.721040189125296
46.1829056954011 0.738770685579196
46.1930175032467 0.862884160756501
46.2031293110922 0.809692671394799
46.2132411189377 0.856973995271868
46.2233529267833 0.685579196217494
46.2334647346288 0.898345153664303
46.2435765424743 0.650118203309693
46.2536883503199 0.679669030732861
46.2638001581654 0.815602836879433
46.2739119660109 0.868794326241135
46.2840237738565 0.845153664302601
46.294135581702 0.892434988179669
46.3042473895475 0.608747044917258
46.3143591973931 0.803782505910166
46.3244710052386 0.803782505910166
46.3345828130841 0.839243498817967
46.3446946209297 0.774231678486998
46.3548064287752 0.797872340425532
46.3649182366207 0.715130023640662
46.3750300444663 0.833333333333333
46.3851418523118 0.803782505910166
46.3952536601573 0.892434988179669
46.4053654680029 0.768321513002364
46.4154772758484 0.886524822695036
46.4255890836939 0.774231678486998
46.4357008915395 0.697399527186761
46.445812699385 0.709219858156029
46.4559245072305 0.786052009456265
46.4660363150761 0.620567375886525
46.4761481229216 0.703309692671395
46.4862599307671 0.833333333333333
46.4963717386127 0.756501182033097
46.5064835464582 0.904255319148936
46.5165953543037 0.774231678486998
46.5267071621493 0.750591016548463
46.5368189699948 0.815602836879433
46.5469307778403 0.756501182033097
46.5570425856858 0.803782505910166
46.5671543935314 0.738770685579196
46.5772662013769 0.821513002364066
46.5873780092224 0.762411347517731
46.597489817068 0.797872340425532
46.6076016249135 0.797872340425532
46.617713432759 0.791962174940898
46.6278252406046 0.845153664302601
46.6379370484501 0.673758865248227
46.6480488562956 0.803782505910166
46.6581606641412 0.762411347517731
46.6682724719867 0.780141843971631
46.6783842798322 0.786052009456265
46.6884960876778 0.703309692671395
46.6986078955233 0.839243498817967
46.7087197033688 0.738770685579196
46.7188315112144 0.774231678486998
46.7289433190599 0.608747044917258
46.7390551269054 0.821513002364066
46.749166934751 0.821513002364066
46.7592787425965 0.732860520094563
46.769390550442 0.738770685579196
46.7795023582876 0.756501182033097
46.7896141661331 0.679669030732861
46.7997259739786 0.74468085106383
46.8098377818242 0.756501182033097
46.8199495896697 0.8274231678487
46.8300613975152 0.673758865248227
46.8401732053608 0.762411347517731
46.8502850132063 0.791962174940898
46.8603968210518 0.732860520094563
46.8705086288974 0.756501182033097
46.8806204367429 0.780141843971631
46.8907322445884 0.774231678486998
46.900844052434 0.726950354609929
46.9109558602795 0.821513002364066
46.921067668125 0.833333333333333
46.9311794759706 0.797872340425532
46.9412912838161 0.768321513002364
46.9514030916616 0.738770685579196
46.9615148995072 0.780141843971631
46.9716267073527 0.774231678486998
46.9817385151982 0.750591016548463
46.9918503230438 0.786052009456265
47.0019621308893 0.756501182033097
47.0120739387348 0.74468085106383
47.0221857465804 0.738770685579196
47.0322975544259 0.756501182033097
47.0424093622714 0.74468085106383
47.052521170117 0.833333333333333
47.0626329779625 0.8274231678487
47.072744785808 0.74468085106383
47.0828565936536 0.797872340425532
47.0929684014991 0.673758865248227
47.1030802093446 0.667848699763593
47.1131920171902 0.862884160756501
47.1233038250357 0.709219858156029
47.1334156328812 0.916075650118204
47.1435274407268 0.803782505910166
47.1536392485723 0.685579196217494
47.1637510564178 0.809692671394799
47.1738628642634 0.738770685579196
47.1839746721089 0.809692671394799
47.1940864799544 0.697399527186761
47.2041982878 0.697399527186761
47.2143100956455 0.673758865248227
47.224421903491 0.750591016548463
47.2345337113366 0.797872340425532
47.2446455191821 0.797872340425532
47.2547573270276 0.856973995271868
47.2648691348732 0.786052009456265
47.2749809427187 0.780141843971631
47.2850927505642 0.774231678486998
47.2952045584098 0.638297872340426
47.3053163662553 0.738770685579196
47.3154281741008 0.721040189125296
47.3255399819463 0.697399527186761
47.3356517897919 0.803782505910166
47.3457635976374 0.780141843971631
47.3558754054829 0.721040189125296
47.3659872133285 0.620567375886525
47.376099021174 0.697399527186761
47.3862108290195 0.892434988179669
47.3963226368651 0.791962174940898
47.4064344447106 0.626477541371159
47.4165462525561 0.721040189125296
47.4266580604017 0.673758865248227
47.4367698682472 0.786052009456265
47.4468816760927 0.868794326241135
47.4569934839383 0.886524822695036
47.4671052917838 0.786052009456265
47.4772170996293 0.756501182033097
47.4873289074749 0.874704491725768
47.4974407153204 0.821513002364066
47.5075525231659 0.904255319148936
47.5176643310115 0.904255319148936
47.527776138857 0.862884160756501
47.5378879467025 0.927895981087471
47.5479997545481 0.99290780141844
47.5581115623936 0.945626477541371
47.5682233702391 0.833333333333333
47.5783351780847 0.845153664302601
47.5884469859302 0.862884160756501
47.5985587937757 0.839243498817967
47.6086706016213 0.845153664302601
47.6187824094668 0.821513002364066
47.6288942173123 0.656028368794326
47.6390060251579 0.933806146572104
47.6491178330034 0.780141843971631
47.6592296408489 0.803782505910166
47.6693414486945 0.797872340425532
47.67945325654 0.904255319148936
47.6895650643855 0.845153664302601
47.6996768722311 0.721040189125296
47.7097886800766 0.898345153664303
47.7199004879221 0.797872340425532
47.7300122957677 0.780141843971631
47.7401241036132 0.732860520094563
47.7502359114587 0.833333333333333
47.7603477193043 0.768321513002364
47.7704595271498 0.626477541371159
47.7805713349953 0.803782505910166
47.7906831428409 0.679669030732861
47.8007949506864 0.809692671394799
47.8109067585319 0.738770685579196
47.8210185663775 0.821513002364066
47.831130374223 0.797872340425532
47.8412421820685 0.774231678486998
47.8513539899141 0.726950354609929
47.8614657977596 0.726950354609929
47.8715776056051 0.74468085106383
47.8816894134507 0.803782505910166
47.8918012212962 0.66193853427896
47.9019130291417 0.768321513002364
47.9120248369873 0.791962174940898
47.9221366448328 0.768321513002364
47.9322484526783 0.809692671394799
47.9423602605239 0.732860520094563
47.9524720683694 0.691489361702128
47.9625838762149 0.638297872340426
47.9726956840605 0.780141843971631
47.982807491906 0.756501182033097
47.9929192997515 0.833333333333333
48.0030311075971 0.821513002364066
48.0131429154426 0.703309692671395
48.0232547232881 0.774231678486998
48.0333665311337 0.709219858156029
48.0434783389792 0.721040189125296
48.0535901468247 0.697399527186761
48.0637019546703 0.856973995271868
48.0738137625158 0.685579196217494
48.0839255703613 0.886524822695036
48.0940373782068 0.892434988179669
48.1041491860524 0.732860520094563
48.1142609938979 0.738770685579196
48.1243728017434 0.738770685579196
48.134484609589 0.821513002364066
48.1445964174345 0.602836879432624
48.15470822528 0.632387706855792
48.1648200331256 0.673758865248227
48.1749318409711 0.673758865248227
48.1850436488166 0.91016548463357
48.1951554566622 0.691489361702128
48.2052672645077 0.803782505910166
48.2153790723532 0.898345153664303
48.2254908801988 0.797872340425532
48.2356026880443 0.845153664302601
48.2457144958898 0.732860520094563
48.2558263037354 0.8274231678487
48.2659381115809 0.632387706855792
48.2760499194264 0.839243498817967
48.286161727272 0.738770685579196
48.2962735351175 0.66193853427896
48.306385342963 0.862884160756501
48.3164971508086 0.691489361702128
48.3266089586541 0.74468085106383
48.3367207664996 0.709219858156029
48.3468325743452 0.845153664302601
48.3569443821907 0.809692671394799
48.3670561900362 0.750591016548463
48.3771679978818 0.721040189125296
48.3872798057273 0.815602836879433
48.3973916135728 0.644208037825059
48.4075034214184 0.74468085106383
48.4176152292639 0.66193853427896
48.4277270371094 0.845153664302601
48.437838844955 0.791962174940898
48.4479506528005 0.774231678486998
48.458062460646 0.821513002364066
48.4681742684916 0.738770685579196
48.4782860763371 0.691489361702128
48.4883978841826 0.620567375886525
48.4985096920282 0.732860520094563
48.5086214998737 0.738770685579196
48.5187333077192 0.709219858156029
48.5288451155648 0.738770685579196
48.5389569234103 0.880614657210402
48.5490687312558 0.721040189125296
48.5591805391014 0.797872340425532
48.5692923469469 0.839243498817967
48.5794041547924 0.791962174940898
48.589515962638 0.738770685579196
48.5996277704835 0.815602836879433
48.609739578329 0.809692671394799
48.6198513861746 0.774231678486998
48.6299631940201 0.780141843971631
48.6400750018656 0.8274231678487
48.6501868097112 0.679669030732861
48.6602986175567 0.756501182033097
48.6704104254022 0.738770685579196
48.6805222332478 0.815602836879433
48.6906340410933 0.732860520094563
48.7007458489388 0.679669030732861
48.7108576567844 0.632387706855792
48.7209694646299 0.756501182033097
48.7310812724754 0.762411347517731
48.741193080321 0.862884160756501
48.7513048881665 0.768321513002364
48.761416696012 0.803782505910166
48.7715285038576 0.715130023640662
48.7816403117031 0.673758865248227
48.7917521195486 0.685579196217494
48.8018639273942 0.797872340425532
48.8119757352397 0.715130023640662
48.8220875430852 0.774231678486998
48.8321993509308 0.868794326241135
48.8423111587763 0.673758865248227
48.8524229666218 0.851063829787234
48.8625347744673 0.868794326241135
48.8726465823129 0.667848699763593
48.8827583901584 0.596926713947991
48.8928701980039 0.644208037825059
48.9029820058495 0.762411347517731
48.913093813695 0.856973995271868
48.9232056215405 0.797872340425532
48.9333174293861 0.797872340425532
48.9434292372316 0.602836879432624
48.9535410450771 0.650118203309693
48.9636528529227 0.626477541371159
48.9737646607682 0.833333333333333
48.9838764686137 0.715130023640662
48.9939882764593 0.685579196217494
49.0041000843048 0.738770685579196
49.0142118921503 0.679669030732861
49.0243236999959 0.715130023640662
49.0344355078414 0.945626477541371
49.0445473156869 0.780141843971631
49.0546591235325 0.756501182033097
49.064770931378 0.602836879432624
49.0748827392235 0.709219858156029
49.0849945470691 0.738770685579196
49.0951063549146 0.803782505910166
49.1052181627601 0.845153664302601
49.1153299706057 0.797872340425532
49.1254417784512 0.756501182033097
49.1355535862967 0.780141843971631
49.1456653941423 0.786052009456265
49.1557772019878 0.697399527186761
49.1658890098333 0.738770685579196
49.1760008176789 0.762411347517731
49.1861126255244 0.803782505910166
49.1962244333699 0.74468085106383
49.2063362412155 0.809692671394799
49.216448049061 0.803782505910166
49.2265598569065 0.709219858156029
49.2366716647521 0.916075650118204
49.2467834725976 0.815602836879433
49.2568952804431 0.839243498817967
49.2670070882887 0.750591016548463
49.2771188961342 0.679669030732861
49.2872307039797 0.833333333333333
49.2973425118253 0.679669030732861
49.3074543196708 0.762411347517731
49.3175661275163 0.703309692671395
49.3276779353619 0.679669030732861
49.3377897432074 0.608747044917258
49.3479015510529 0.791962174940898
49.3580133588985 0.791962174940898
49.368125166744 0.726950354609929
49.3782369745895 0.786052009456265
49.3883487824351 0.74468085106383
49.3984605902806 0.809692671394799
49.4085723981261 0.762411347517731
49.4186842059717 0.762411347517731
49.4287960138172 0.614657210401891
49.4389078216627 0.614657210401891
49.4490196295083 0.667848699763593
49.4591314373538 0.762411347517731
49.4692432451993 0.762411347517731
49.4793550530449 0.697399527186761
49.4894668608904 0.821513002364066
49.4995786687359 0.856973995271868
49.5096904765815 0.673758865248227
49.519802284427 0.721040189125296
49.5299140922725 0.756501182033097
49.5400259001181 0.786052009456265
49.5501377079636 0.762411347517731
49.5602495158091 0.614657210401891
49.5703613236547 0.780141843971631
49.5804731315002 0.703309692671395
49.5905849393457 0.780141843971631
49.6006967471913 0.916075650118204
49.6108085550368 0.567375886524823
49.6209203628823 0.732860520094563
49.6310321707278 0.762411347517731
49.6411439785734 0.709219858156029
49.6512557864189 0.74468085106383
49.6613675942644 0.638297872340426
49.67147940211 0.786052009456265
49.6815912099555 0.839243498817967
49.691703017801 0.726950354609929
49.7018148256466 0.715130023640662
49.7119266334921 0.862884160756501
49.7220384413376 0.738770685579196
49.7321502491832 0.673758865248227
49.7422620570287 0.750591016548463
49.7523738648742 0.66193853427896
49.7624856727198 0.821513002364066
49.7725974805653 0.608747044917258
49.7827092884108 0.880614657210402
49.7928210962564 0.738770685579196
49.8029329041019 0.74468085106383
49.8130447119474 0.774231678486998
49.823156519793 0.715130023640662
49.8332683276385 0.904255319148936
49.843380135484 0.750591016548463
49.8534919433296 0.756501182033097
49.8636037511751 0.667848699763593
49.8737155590206 0.644208037825059
49.8838273668662 0.732860520094563
49.8939391747117 0.886524822695036
49.9040509825572 0.786052009456265
49.9141627904028 0.774231678486998
49.9242745982483 0.650118203309693
49.9343864060938 0.845153664302601
49.9444982139394 0.797872340425532
49.9546100217849 0.721040189125296
49.9647218296304 0.768321513002364
49.974833637476 0.774231678486998
49.9849454453215 0.797872340425532
49.995057253167 0.732860520094563
50.0051690610126 0.880614657210402
50.0152808688581 0.644208037825059
50.0253926767036 0.66193853427896
50.0355044845492 0.721040189125296
50.0456162923947 0.667848699763593
50.0557281002402 0.851063829787234
50.0658399080858 0.851063829787234
50.0759517159313 0.709219858156029
50.0860635237768 0.833333333333333
50.0961753316224 0.750591016548463
50.1062871394679 0.74468085106383
50.1163989473134 0.833333333333333
50.126510755159 0.691489361702128
50.1366225630045 0.697399527186761
50.14673437085 0.673758865248227
50.1568461786956 0.809692671394799
50.1669579865411 0.8274231678487
50.1770697943866 0.803782505910166
50.1871816022322 0.815602836879433
50.1972934100777 0.74468085106383
50.2074052179232 0.874704491725768
50.2175170257688 0.750591016548463
50.2276288336143 0.74468085106383
50.2377406414598 0.697399527186761
50.2478524493054 0.691489361702128
50.2579642571509 0.715130023640662
50.2680760649964 0.839243498817967
50.278187872842 0.697399527186761
50.2882996806875 0.874704491725768
50.298411488533 0.762411347517731
50.3085232963786 0.756501182033097
50.3186351042241 0.750591016548463
50.3287469120696 0.780141843971631
50.3388587199152 0.74468085106383
50.3489705277607 0.756501182033097
50.3590823356062 0.732860520094563
50.3691941434518 0.756501182033097
50.3793059512973 0.656028368794326
50.3894177591428 0.732860520094563
50.3995295669883 0.738770685579196
50.4096413748339 0.715130023640662
50.4197531826794 0.756501182033097
50.4298649905249 0.774231678486998
50.4399767983705 0.703309692671395
50.450088606216 0.697399527186761
50.4602004140615 0.697399527186761
50.4703122219071 0.774231678486998
50.4804240297526 0.880614657210402
50.4905358375981 0.703309692671395
50.5006476454437 0.632387706855792
50.5107594532892 0.732860520094563
50.5208712611347 0.791962174940898
50.5309830689803 0.691489361702128
50.5410948768258 0.845153664302601
50.5512066846713 0.697399527186761
50.5613184925169 0.726950354609929
50.5714303003624 0.667848699763593
50.5815421082079 0.673758865248227
50.5916539160535 0.780141843971631
50.601765723899 0.756501182033097
50.6118775317445 0.762411347517731
50.6219893395901 0.886524822695036
50.6321011474356 0.803782505910166
50.6422129552811 0.667848699763593
50.6523247631267 0.768321513002364
50.6624365709722 0.726950354609929
50.6725483788177 0.868794326241135
50.6826601866633 0.614657210401891
50.6927719945088 0.620567375886525
50.7028838023543 0.750591016548463
50.7129956101999 0.667848699763593
50.7231074180454 0.797872340425532
50.7332192258909 0.815602836879433
50.7433310337365 0.768321513002364
50.753442841582 0.732860520094563
50.7635546494275 0.780141843971631
50.7736664572731 0.791962174940898
50.7837782651186 0.809692671394799
50.7938900729641 0.703309692671395
50.8040018808097 0.774231678486998
50.8141136886552 0.874704491725768
50.8242254965007 0.815602836879433
50.8343373043463 0.750591016548463
50.8444491121918 0.851063829787234
50.8545609200373 0.703309692671395
50.8646727278829 0.762411347517731
50.8747845357284 0.709219858156029
50.8848963435739 0.797872340425532
50.8950081514195 0.667848699763593
50.905119959265 0.762411347517731
50.9152317671105 0.620567375886525
50.9253435749561 0.821513002364066
50.9354553828016 0.8274231678487
50.9455671906471 0.786052009456265
50.9556789984927 0.809692671394799
50.9657908063382 0.715130023640662
50.9759026141837 0.732860520094563
50.9860144220293 0.756501182033097
50.9961262298748 0.803782505910166
51.0062380377203 0.768321513002364
51.0163498455659 0.8274231678487
51.0264616534114 0.868794326241135
51.0365734612569 0.738770685579196
51.0466852691025 0.750591016548463
51.056797076948 0.809692671394799
51.0669088847935 0.762411347517731
51.0770206926391 0.732860520094563
51.0871325004846 0.762411347517731
51.0972443083301 0.697399527186761
51.1073561161757 0.904255319148936
51.1174679240212 0.650118203309693
51.1275797318667 0.721040189125296
51.1376915397123 0.809692671394799
51.1478033475578 0.726950354609929
51.1579151554033 0.768321513002364
51.1680269632488 0.738770685579196
51.1781387710944 0.839243498817967
51.1882505789399 0.780141843971631
51.1983623867854 0.780141843971631
51.208474194631 0.738770685579196
51.2185860024765 0.815602836879433
51.228697810322 0.797872340425532
51.2388096181676 0.797872340425532
51.2489214260131 0.809692671394799
51.2590332338586 0.762411347517731
51.2691450417042 0.762411347517731
51.2792568495497 0.703309692671395
51.2893686573952 0.756501182033097
51.2994804652408 0.845153664302601
51.3095922730863 0.697399527186761
51.3197040809318 0.821513002364066
51.3298158887774 0.833333333333333
51.3399276966229 0.667848699763593
51.3500395044684 0.797872340425532
51.360151312314 0.815602836879433
51.3702631201595 0.851063829787234
51.380374928005 0.791962174940898
51.3904867358506 0.685579196217494
51.4005985436961 0.74468085106383
51.4107103515416 0.673758865248227
51.4208221593872 0.726950354609929
51.4309339672327 0.709219858156029
51.4410457750782 0.703309692671395
51.4511575829238 0.721040189125296
51.4612693907693 0.768321513002364
51.4713811986148 0.738770685579196
51.4814930064604 0.673758865248227
51.4916048143059 0.756501182033097
51.5017166221514 0.74468085106383
51.511828429997 0.774231678486998
51.5219402378425 0.685579196217494
51.532052045688 0.726950354609929
51.5421638535336 0.703309692671395
51.5522756613791 0.774231678486998
51.5623874692246 0.809692671394799
51.5724992770702 0.780141843971631
51.5826110849157 0.732860520094563
51.5927228927612 0.697399527186761
51.6028347006068 0.715130023640662
51.6129465084523 0.738770685579196
51.6230583162978 0.732860520094563
51.6331701241434 0.791962174940898
51.6432819319889 0.803782505910166
51.6533937398344 0.8274231678487
51.66350554768 0.768321513002364
51.6736173555255 0.916075650118204
51.683729163371 0.650118203309693
51.6938409712166 0.750591016548463
51.7039527790621 0.715130023640662
51.7140645869076 0.673758865248227
51.7241763947532 0.691489361702128
51.7342882025987 0.809692671394799
51.7444000104442 0.703309692671395
51.7545118182898 0.756501182033097
51.7646236261353 0.756501182033097
51.7747354339808 0.845153664302601
51.7848472418264 0.638297872340426
51.7949590496719 0.66193853427896
51.8050708575174 0.780141843971631
51.815182665363 0.780141843971631
51.8252944732085 0.756501182033097
51.835406281054 0.709219858156029
51.8455180888996 0.874704491725768
51.8556298967451 0.74468085106383
51.8657417045906 0.768321513002364
51.8758535124362 0.774231678486998
51.8859653202817 0.726950354609929
51.8960771281272 0.868794326241135
51.9061889359728 0.845153664302601
51.9163007438183 0.874704491725768
51.9264125516638 0.803782505910166
51.9365243595093 0.833333333333333
51.9466361673549 0.862884160756501
51.9567479752004 0.709219858156029
51.9668597830459 0.667848699763593
51.9769715908915 0.709219858156029
51.987083398737 0.851063829787234
51.9971952065825 0.679669030732861
52.0073070144281 0.691489361702128
52.0174188222736 0.756501182033097
52.0275306301191 0.738770685579196
52.0376424379647 0.750591016548463
52.0477542458102 0.809692671394799
52.0578660536557 0.756501182033097
52.0679778615013 0.851063829787234
52.0780896693468 0.91016548463357
52.0882014771923 0.780141843971631
52.0983132850379 0.833333333333333
52.1084250928834 0.74468085106383
52.1185369007289 0.756501182033097
52.1286487085745 0.756501182033097
52.13876051642 0.685579196217494
52.1488723242655 0.709219858156029
52.1589841321111 0.709219858156029
52.1690959399566 0.868794326241135
52.1792077478021 0.768321513002364
52.1893195556477 0.839243498817967
52.1994313634932 0.768321513002364
52.2095431713387 0.74468085106383
52.2196549791843 0.780141843971631
52.2297667870298 0.750591016548463
52.2398785948753 0.732860520094563
52.2499904027209 0.927895981087471
52.2601022105664 0.933806146572104
52.2702140184119 0.797872340425532
52.2803258262575 0.898345153664303
52.290437634103 0.756501182033097
52.3005494419485 0.845153664302601
52.3106612497941 0.856973995271868
52.3207730576396 0.750591016548463
52.3308848654851 0.845153664302601
52.3409966733307 0.756501182033097
52.3511084811762 0.774231678486998
52.3612202890217 0.797872340425532
52.3713320968673 0.821513002364066
52.3814439047128 0.74468085106383
52.3915557125583 0.721040189125296
52.4016675204039 0.868794326241135
52.4117793282494 0.927895981087471
52.4218911360949 0.774231678486998
52.4320029439405 0.786052009456265
52.442114751786 0.898345153664303
52.4522265596315 0.815602836879433
52.4623383674771 0.774231678486998
52.4724501753226 0.833333333333333
52.4825619831681 0.868794326241135
52.4926737910137 0.91016548463357
52.5027855988592 0.74468085106383
52.5128974067047 0.797872340425532
52.5230092145503 0.786052009456265
52.5331210223958 0.786052009456265
52.5432328302413 0.74468085106383
52.5533446380869 0.898345153664303
52.5634564459324 0.791962174940898
52.5735682537779 0.726950354609929
52.5836800616235 0.768321513002364
52.593791869469 0.797872340425532
52.6039036773145 0.874704491725768
52.6140154851601 0.732860520094563
52.6241272930056 0.874704491725768
52.6342391008511 0.780141843971631
52.6443509086967 0.880614657210402
52.6544627165422 0.945626477541371
52.6645745243877 0.892434988179669
52.6746863322333 0.904255319148936
52.6847981400788 0.957446808510638
52.6949099479243 0.8274231678487
52.7050217557698 0.851063829787234
52.7151335636154 0.803782505910166
52.7252453714609 0.898345153664303
52.7353571793064 0.921985815602837
52.745468987152 0.8274231678487
52.7555807949975 0.851063829787234
52.765692602843 0.933806146572104
52.7758044106886 0.916075650118204
52.7859162185341 0.892434988179669
52.7960280263796 0.91016548463357
52.8061398342252 0.851063829787234
52.8162516420707 0.856973995271868
52.8263634499162 0.945626477541371
52.8364752577618 0.839243498817967
52.8465870656073 0.927895981087471
52.8566988734528 0.862884160756501
52.8668106812984 0.880614657210402
52.8769224891439 0.898345153664303
52.8870342969894 0.91016548463357
52.897146104835 0.815602836879433
52.9072579126805 0.862884160756501
52.917369720526 0.957446808510638
52.9274815283716 0.957446808510638
52.9375933362171 0.786052009456265
52.9477051440626 0.951536643026005
52.9578169519082 0.957446808510638
52.9679287597537 0.963356973995272
52.9780405675992 0.945626477541371
52.9881523754448 1.04609929078014
52.9982641832903 0.886524822695036
53.0083759911358 0.803782505910166
53.0184877989814 0.786052009456265
53.0285996068269 0.839243498817967
53.0387114146724 1.06382978723404
53.048823222518 0.880614657210402
53.0589350303635 0.963356973995272
53.069046838209 0.975177304964539
53.0791586460546 0.886524822695036
53.0892704539001 0.898345153664303
53.0993822617456 0.868794326241135
53.1094940695912 0.868794326241135
53.1196058774367 0.868794326241135
53.1297176852822 0.945626477541371
53.1398294931278 0.975177304964539
53.1499413009733 0.880614657210402
53.1600531088188 0.868794326241135
53.1701649166644 0.916075650118204
53.1802767245099 0.91016548463357
53.1903885323554 0.939716312056738
53.200500340201 0.939716312056738
53.2106121480465 0.975177304964539
53.220723955892 0.981087470449173
53.2308357637376 1.04018912529551
53.2409475715831 0.939716312056738
53.2510593794286 0.921985815602837
53.2611711872742 0.945626477541371
53.2712829951197 1.01654846335697
53.2813948029652 0.951536643026005
53.2915066108108 0.998817966903074
53.3016184186563 0.898345153664303
53.3117302265018 0.945626477541371
53.3218420343474 0.916075650118204
53.3319538421929 0.892434988179669
53.3420656500384 0.981087470449173
53.352177457884 1.03427895981087
53.3622892657295 1.04018912529551
53.372401073575 0.957446808510638
53.3825128814206 1.04609929078014
53.3926246892661 0.886524822695036
53.4027364971116 0.916075650118204
53.4128483049572 0.933806146572104
53.4229601128027 1.00472813238771
53.4330719206482 1.12884160756501
53.4431837284938 1.07565011820331
53.4532955363393 0.975177304964539
53.4634073441848 0.945626477541371
53.4735191520303 0.99290780141844
53.4836309598759 0.904255319148936
53.4937427677214 1.00472813238771
53.5038545755669 1.15839243498818
53.5139663834125 0.99290780141844
53.524078191258 0.981087470449173
53.5341899991035 0.945626477541371
53.5443018069491 0.945626477541371
53.5544136147946 0.969267139479906
53.5645254226401 1.10520094562648
53.5746372304857 1.00472813238771
53.5847490383312 0.969267139479906
53.5948608461767 0.939716312056738
53.6049726540223 1.03427895981087
53.6150844618678 1.03427895981087
53.6251962697133 0.927895981087471
53.6353080775589 1.02836879432624
53.6454198854044 1.04609929078014
53.6555316932499 0.927895981087471
53.6656435010955 1.02836879432624
53.675755308941 1.06382978723404
53.6858671167865 1.06382978723404
53.6959789246321 1.12293144208038
53.7060907324776 0.969267139479906
53.7162025403231 0.880614657210402
53.7263143481687 0.975177304964539
53.7364261560142 0.951536643026005
53.7465379638597 0.780141843971631
53.7566497717053 1.10520094562648
53.7667615795508 1.03427895981087
53.7768733873963 1.11702127659575
53.7869851952419 0.892434988179669
53.7970970030874 0.975177304964539
53.8072088109329 1.02836879432624
53.8173206187785 0.939716312056738
53.827432426624 1.05791962174941
53.8375442344695 0.998817966903074
53.8476560423151 1.06973995271868
53.8577678501606 1.15248226950355
53.8678796580061 1.02836879432624
53.8779914658517 0.963356973995272
53.8881032736972 1.05791962174941
53.8982150815427 1.17021276595745
53.9083268893883 1.11111111111111
53.9184386972338 1.04018912529551
53.9285505050793 0.963356973995272
53.9386623129249 0.951536643026005
53.9487741207704 0.916075650118204
53.9588859286159 1.09929078014184
53.9689977364615 0.957446808510638
53.979109544307 1.02836879432624
53.9892213521525 1.00472813238771
53.9993331599981 1.10520094562648
54.0094449678436 1.08747044917258
54.0195567756891 1.03427895981087
54.0296685835347 1.06973995271868
54.0397803913802 0.969267139479906
54.0498921992257 0.904255319148936
54.0600040070713 0.957446808510638
54.0701158149168 0.933806146572104
54.0802276227623 0.880614657210402
54.0903394306079 1.01654846335697
54.1004512384534 0.833333333333333
54.1105630462989 1.04018912529551
54.1206748541445 0.998817966903074
54.13078666199 0.933806146572104
54.1408984698355 0.975177304964539
54.1510102776811 0.874704491725768
54.1611220855266 1.06973995271868
54.1712338933721 0.898345153664303
54.1813457012177 1.02836879432624
54.1914575090632 0.845153664302601
54.2015693169087 1.02836879432624
54.2116811247543 1.04609929078014
54.2217929325998 0.939716312056738
54.2319047404453 0.998817966903074
54.2420165482908 1.05200945626478
54.2521283561364 0.986997635933806
54.2622401639819 0.927895981087471
54.2723519718274 0.998817966903074
54.282463779673 0.851063829787234
54.2925755875185 1.05200945626478
54.302687395364 0.886524822695036
54.3127992032096 0.898345153664303
54.3229110110551 1.00472813238771
54.3330228189006 0.8274231678487
54.3431346267462 0.981087470449173
54.3532464345917 0.939716312056738
54.3633582424372 0.868794326241135
54.3734700502828 0.921985815602837
54.3835818581283 0.957446808510638
54.3936936659738 0.91016548463357
54.4038054738194 0.927895981087471
54.4139172816649 0.945626477541371
54.4240290895104 0.927895981087471
54.434140897356 0.8274231678487
54.4442527052015 0.898345153664303
54.454364513047 0.91016548463357
54.4644763208926 0.898345153664303
54.4745881287381 1.00472813238771
54.4846999365836 0.916075650118204
54.4948117444292 1.00472813238771
54.5049235522747 0.921985815602837
54.5150353601202 0.945626477541371
54.5251471679658 1.01063829787234
54.5352589758113 0.91016548463357
54.5453707836568 0.957446808510638
54.5554825915024 0.963356973995272
54.5655943993479 0.874704491725768
54.5757062071934 0.8274231678487
54.585818015039 0.939716312056738
54.5959298228845 0.921985815602837
54.60604163073 0.99290780141844
54.6161534385756 0.851063829787234
54.6262652464211 1.05791962174941
54.6363770542666 0.862884160756501
54.6464888621122 0.981087470449173
54.6566006699577 0.874704491725768
54.6667124778032 0.839243498817967
54.6768242856488 0.898345153664303
54.6869360934943 0.862884160756501
54.6970479013398 0.892434988179669
54.7071597091854 0.815602836879433
54.7172715170309 0.851063829787234
54.7273833248764 0.986997635933806
54.737495132722 0.945626477541371
54.7476069405675 0.933806146572104
54.757718748413 0.904255319148936
54.7678305562586 0.880614657210402
54.7779423641041 0.839243498817967
54.7880541719496 0.939716312056738
54.7981659797952 0.851063829787234
54.8082777876407 0.738770685579196
54.8183895954862 0.845153664302601
54.8285014033318 0.862884160756501
54.8386132111773 0.874704491725768
54.8487250190228 1.00472813238771
54.8588368268684 0.809692671394799
54.8689486347139 0.975177304964539
54.8790604425594 0.821513002364066
54.889172250405 0.845153664302601
54.8992840582505 0.868794326241135
54.909395866096 0.904255319148936
54.9195076739416 0.845153664302601
54.9296194817871 0.91016548463357
54.9397312896326 0.921985815602837
54.9498430974782 0.809692671394799
54.9599549053237 0.851063829787234
54.9700667131692 0.957446808510638
54.9801785210148 0.862884160756501
54.9902903288603 0.933806146572104
55.0004021367058 0.892434988179669
55.0105139445513 0.951536643026005
55.0206257523969 0.851063829787234
55.0307375602424 0.862884160756501
55.0408493680879 1.04018912529551
55.0509611759335 0.880614657210402
55.061072983779 0.74468085106383
55.0711847916245 0.803782505910166
55.0812965994701 0.933806146572104
55.0914084073156 0.780141843971631
55.1015202151611 0.91016548463357
55.1116320230067 0.981087470449173
55.1217438308522 0.797872340425532
55.1318556386977 0.768321513002364
55.1419674465433 0.998817966903074
55.1520792543888 0.768321513002364
55.1621910622343 1.04609929078014
55.1723028700799 0.8274231678487
55.1824146779254 0.916075650118204
55.1925264857709 0.880614657210402
55.2026382936165 0.815602836879433
55.212750101462 0.916075650118204
55.2228619093075 0.898345153664303
55.2329737171531 0.8274231678487
55.2430855249986 0.975177304964539
55.2531973328441 0.939716312056738
55.2633091406897 0.768321513002364
55.2734209485352 0.738770685579196
55.2835327563807 0.862884160756501
55.2936445642263 0.892434988179669
55.3037563720718 0.957446808510638
55.3138681799173 0.839243498817967
55.3239799877629 0.856973995271868
55.3340917956084 0.939716312056738
55.3442036034539 0.904255319148936
55.3543154112995 0.963356973995272
55.364427219145 0.898345153664303
55.3745390269905 0.91016548463357
55.3846508348361 0.833333333333333
55.3947626426816 0.927895981087471
55.4048744505271 0.951536643026005
55.4149862583727 0.815602836879433
55.4250980662182 0.998817966903074
55.4352098740637 0.815602836879433
55.4453216819093 0.91016548463357
55.4554334897548 0.951536643026005
55.4655452976003 0.815602836879433
55.4756571054459 0.738770685579196
55.4857689132914 0.91016548463357
55.4958807211369 0.786052009456265
55.5059925289825 0.786052009456265
55.516104336828 0.91016548463357
55.5262161446735 0.99290780141844
55.5363279525191 0.756501182033097
55.5464397603646 0.981087470449173
55.5565515682101 0.780141843971631
55.5666633760557 0.898345153664303
55.5767751839012 0.868794326241135
55.5868869917467 0.886524822695036
55.5969987995923 1.05200945626478
55.6071106074378 0.933806146572104
55.6172224152833 0.898345153664303
55.6273342231289 0.862884160756501
55.6374460309744 1.04018912529551
55.6475578388199 0.921985815602837
55.6576696466655 1.06973995271868
55.667781454511 0.762411347517731
55.6778932623565 0.933806146572104
55.6880050702021 0.786052009456265
55.6981168780476 0.774231678486998
55.7082286858931 0.963356973995272
55.7183404937387 0.803782505910166
55.7284523015842 0.898345153664303
55.7385641094297 0.774231678486998
55.7486759172753 0.886524822695036
55.7587877251208 0.886524822695036
55.7688995329663 0.874704491725768
55.7790113408118 0.892434988179669
55.7891231486574 0.957446808510638
55.7992349565029 0.815602836879433
55.8093467643484 0.839243498817967
55.819458572194 0.99290780141844
55.8295703800395 0.821513002364066
55.839682187885 0.892434988179669
55.8497939957306 0.998817966903074
55.8599058035761 0.8274231678487
55.8700176114216 0.892434988179669
55.8801294192672 0.904255319148936
55.8902412271127 0.845153664302601
55.9003530349582 0.91016548463357
55.9104648428038 1.02836879432624
55.9205766506493 1.06382978723404
55.9306884584948 1.02245862884161
55.9408002663404 0.939716312056738
55.9509120741859 0.969267139479906
55.9610238820314 0.939716312056738
55.971135689877 0.945626477541371
55.9812474977225 0.981087470449173
55.991359305568 1.04609929078014
56.0014711134136 0.921985815602837
56.0115829212591 0.916075650118204
56.0216947291046 0.916075650118204
56.0318065369502 0.916075650118204
56.0419183447957 0.898345153664303
56.0520301526412 1.02245862884161
56.0621419604868 0.768321513002364
56.0722537683323 1.03427895981087
56.0823655761778 1.03427895981087
56.0924773840234 1.06973995271868
56.1025891918689 1.02836879432624
56.1127009997144 0.986997635933806
56.12281280756 0.951536643026005
56.1329246154055 0.851063829787234
56.143036423251 1.06382978723404
56.1531482310966 1.05200945626478
56.1632600389421 1.17612293144208
56.1733718467876 1.11702127659575
56.1834836546332 1.04018912529551
56.1935954624787 1.01654846335697
56.2037072703242 0.951536643026005
56.2138190781698 0.868794326241135
56.2239308860153 0.975177304964539
56.2340426938608 1.04018912529551
56.2441545017064 1.11111111111111
56.2542663095519 1.09338061465721
56.2643781173974 1.01063829787234
56.274489925243 1.03427895981087
56.2846017330885 1.06382978723404
56.294713540934 1.05200945626478
56.3048253487796 1.14066193853428
56.3149371566251 1.07565011820331
56.3250489644706 1.09338061465721
56.3351607723162 1.04609929078014
56.3452725801617 1.06382978723404
56.3553843880072 1.05200945626478
56.3654961958528 0.969267139479906
56.3756080036983 0.963356973995272
56.3857198115438 1.12884160756501
56.3958316193894 1.12293144208038
56.4059434272349 1.04609929078014
56.4160552350804 1.12293144208038
56.426167042926 1.09338061465721
56.4362788507715 1.05791962174941
56.446390658617 1.11702127659575
56.4565024664626 1.11111111111111
56.4666142743081 1.20567375886525
56.4767260821536 1.27659574468085
56.4868378899992 1.08156028368794
56.4969496978447 1.18203309692671
56.5070615056902 1.27068557919622
56.5171733135358 1.15248226950355
56.5272851213813 1.22340425531915
56.5373969292268 1.35342789598109
56.5475087370723 1.18794326241135
56.5576205449179 1.14066193853428
56.5677323527634 1.13475177304965
56.5778441606089 1.34751773049645
56.5879559684545 1.22931442080378
56.5980677763 1.25295508274232
56.6081795841455 1.21158392434988
56.6182913919911 1.30614657210402
56.6284031998366 1.32387706855792
56.6385150076821 1.19976359338061
56.6486268155277 1.27659574468085
56.6587386233732 1.26477541371158
56.6688504312187 1.21158392434988
56.6789622390643 1.23522458628842
56.6890740469098 1.25295508274232
56.6991858547553 1.38297872340426
56.7092976626009 1.20567375886525
56.7194094704464 1.34160756501182
56.7295212782919 1.30023640661939
56.7396330861375 1.36524822695035
56.749744893983 1.41843971631206
56.7598567018285 1.37115839243499
56.7699685096741 1.45981087470449
56.7800803175196 1.21158392434988
56.7901921253651 1.53073286052009
56.8003039332107 1.32978723404255
56.8104157410562 1.28841607565012
56.8205275489017 1.42434988179669
56.8306393567473 1.37115839243499
56.8407511645928 1.57210401891253
56.8508629724383 1.34160756501182
56.8609747802839 1.47754137115839
56.8710865881294 1.46572104018913
56.8811983959749 1.548463356974
56.8913102038205 1.45981087470449
56.901422011666 1.54255319148936
56.9115338195115 1.40070921985816
56.9216456273571 1.43026004728132
56.9317574352026 1.46572104018913
56.9418692430481 1.36524822695035
56.9519810508937 1.52482269503546
56.9620928587392 1.54255319148936
56.9722046665847 1.548463356974
56.9823164744303 1.47754137115839
56.9924282822758 1.33569739952719
57.0025400901213 1.41843971631206
57.0126518979669 1.45390070921986
57.0227637058124 1.42434988179669
57.0328755136579 1.48345153664303
57.0429873215035 1.44799054373522
57.053099129349 1.61347517730496
57.0632109371945 1.53664302600473
57.0733227450401 1.47163120567376
57.0834345528856 1.50118203309693
57.0935463607311 1.64302600472813
57.1036581685767 1.38297872340426
57.1137699764222 1.29432624113475
57.1238817842677 1.48345153664303
57.1339935921133 1.37706855791962
57.1441053999588 1.43617021276596
57.1542172078043 1.47163120567376
57.1643290156499 1.51300236406619
57.1744408234954 1.52482269503546
57.1845526313409 1.53073286052009
57.1946644391865 1.53664302600473
57.204776247032 1.47754137115839
57.2148880548775 1.51300236406619
57.2249998627231 1.43617021276596
57.2351116705686 1.50118203309693
57.2452234784141 1.46572104018913
57.2553352862597 1.56028368794326
57.2654470941052 1.6903073286052
57.2755589019507 1.48936170212766
57.2856707097963 1.35933806146572
57.2957825176418 1.40070921985816
57.3058943254873 1.43617021276596
57.3160061333328 1.31796690307329
57.3261179411784 1.45981087470449
57.3362297490239 1.47163120567376
57.3463415568694 1.71985815602837
57.356453364715 1.49527186761229
57.3665651725605 1.40661938534279
57.376676980406 1.50118203309693
57.3867887882516 1.46572104018913
57.3969005960971 1.548463356974
57.4070124039426 1.45390070921986
57.4171242117882 1.43026004728132
57.4272360196337 1.43026004728132
57.4373478274792 1.46572104018913
57.4474596353248 1.25295508274232
57.4575714431703 1.40661938534279
57.4676832510158 1.43617021276596
57.4777950588614 1.35933806146572
57.4879068667069 1.53664302600473
57.4980186745524 1.32978723404255
57.508130482398 1.34160756501182
57.5182422902435 1.41252955082742
57.528354098089 1.41252955082742
57.5384659059346 1.43617021276596
57.5485777137801 1.54255319148936
57.5586895216256 1.37706855791962
57.5688013294712 1.56028368794326
57.5789131373167 1.38888888888889
57.5890249451622 1.60756501182033
57.5991367530078 1.43617021276596
57.6092485608533 1.38297872340426
57.6193603686988 1.31796690307329
57.6294721765444 1.31205673758865
57.6395839843899 1.33569739952719
57.6496957922354 1.44208037825059
57.659807600081 1.22340425531915
57.6699194079265 1.37706855791962
57.680031215772 1.25295508274232
57.6901430236176 1.34751773049645
57.7002548314631 1.22931442080378
57.7103666393086 1.19976359338061
57.7204784471542 1.38888888888889
57.7305902549997 1.48345153664303
57.7407020628452 1.20567375886525
57.7508138706908 1.39479905437352
57.7609256785363 1.33569739952719
57.7710374863818 1.21749408983452
57.7811492942274 1.24704491725768
57.7912611020729 1.21749408983452
57.8013729099184 1.35933806146572
57.811484717764 1.24113475177305
57.8215965256095 1.10520094562648
57.831708333455 1.30614657210402
57.8418201413006 1.28841607565012
57.8519319491461 1.13475177304965
57.8620437569916 1.15248226950355
57.8721555648372 1.11702127659575
57.8822673726827 1.37706855791962
57.8923791805282 1.32387706855792
57.9024909883738 1.17612293144208
57.9126027962193 1.23522458628842
57.9227146040648 1.18794326241135
57.9328264119104 1.07565011820331
57.9429382197559 1.20567375886525
57.9530500276014 1.14066193853428
57.963161835447 1.28250591016548
57.9732736432925 1.34160756501182
57.983385451138 1.03427895981087
57.9934972589836 1.12293144208038
58.0036090668291 0.927895981087471
58.0137208746746 0.880614657210402
58.0238326825202 1.02245862884161
58.0339444903657 1.25295508274232
58.0440562982112 1.12293144208038
58.0541681060568 1.01063829787234
58.0642799139023 1.10520094562648
58.0743917217478 1.08156028368794
58.0845035295933 1.21158392434988
58.0946153374389 1.04018912529551
58.1047271452844 1.05791962174941
58.1148389531299 1.04609929078014
58.1249507609755 1.09929078014184
58.135062568821 1.21158392434988
58.1451743766665 1.00472813238771
58.1552861845121 1.11702127659575
58.1653979923576 0.975177304964539
58.1755098002031 1.23522458628842
58.1856216080487 1.04018912529551
58.1957334158942 0.939716312056738
58.2058452237397 0.975177304964539
58.2159570315853 0.945626477541371
58.2260688394308 1.13475177304965
58.2361806472763 0.8274231678487
58.2462924551219 1.11111111111111
58.2564042629674 0.99290780141844
58.2665160708129 1.00472813238771
58.2766278786585 1.00472813238771
58.286739686504 1.02245862884161
58.2968514943495 1.01063829787234
58.3069633021951 1.01063829787234
58.3170751100406 0.99290780141844
58.3271869178861 1.13475177304965
58.3372987257317 1.05200945626478
58.3474105335772 1.02245862884161
58.3575223414227 1.12293144208038
58.3676341492683 0.951536643026005
58.3777459571138 0.975177304964539
58.3878577649593 0.898345153664303
58.3979695728049 1.04018912529551
58.4080813806504 0.815602836879433
58.4181931884959 1.02245862884161
58.4283049963415 0.927895981087471
58.438416804187 0.91016548463357
58.4485286120325 0.969267139479906
58.4586404198781 0.99290780141844
58.4687522277236 1.05200945626478
58.4788640355691 0.986997635933806
58.4889758434147 0.786052009456265
58.4990876512602 1.00472813238771
58.5091994591057 0.939716312056738
58.5193112669513 0.886524822695036
58.5294230747968 0.975177304964539
58.5395348826423 0.969267139479906
58.5496466904879 0.916075650118204
58.5597584983334 0.880614657210402
58.5698703061789 0.904255319148936
58.5799821140245 0.815602836879433
58.59009392187 0.939716312056738
58.6002057297155 0.91016548463357
58.6103175375611 0.851063829787234
58.6204293454066 0.945626477541371
58.6305411532521 0.803782505910166
58.6406529610977 0.957446808510638
58.6507647689432 0.880614657210402
58.6608765767887 0.927895981087471
58.6709883846343 0.892434988179669
58.6811001924798 1.04018912529551
58.6912120003253 0.957446808510638
58.7013238081709 0.957446808510638
58.7114356160164 0.945626477541371
58.7215474238619 0.892434988179669
58.7316592317075 0.927895981087471
58.741771039553 0.821513002364066
58.7518828473985 0.886524822695036
58.7619946552441 0.880614657210402
58.7721064630896 0.904255319148936
58.7822182709351 0.874704491725768
58.7923300787807 0.939716312056738
58.8024418866262 0.845153664302601
58.8125536944717 0.892434988179669
58.8226655023173 0.721040189125296
58.8327773101628 1.00472813238771
58.8428891180083 0.986997635933806
58.8530009258538 0.833333333333333
58.8631127336994 0.904255319148936
58.8732245415449 0.951536643026005
58.8833363493904 0.732860520094563
58.893448157236 0.916075650118204
58.9035599650815 0.845153664302601
58.913671772927 0.880614657210402
58.9237835807726 0.963356973995272
58.9338953886181 0.916075650118204
58.9440071964636 0.868794326241135
58.9541190043092 0.945626477541371
58.9642308121547 0.916075650118204
58.9743426200002 0.916075650118204
58.9844544278458 0.685579196217494
58.9945662356913 0.809692671394799
59.0046780435368 0.939716312056738
59.0147898513824 0.786052009456265
59.0249016592279 0.774231678486998
59.0350134670734 0.921985815602837
59.045125274919 0.862884160756501
59.0552370827645 0.821513002364066
59.06534889061 0.845153664302601
59.0754606984556 0.874704491725768
59.0855725063011 0.803782505910166
59.0956843141466 0.768321513002364
59.1057961219922 0.916075650118204
59.1159079298377 0.880614657210402
59.1260197376832 0.839243498817967
59.1361315455288 0.780141843971631
59.1462433533743 0.833333333333333
59.1563551612198 0.815602836879433
59.1664669690654 0.904255319148936
59.1765787769109 0.921985815602837
59.1866905847564 0.916075650118204
59.196802392602 0.721040189125296
59.2069142004475 0.874704491725768
59.217026008293 0.703309692671395
59.2271378161386 0.851063829787234
59.2372496239841 0.916075650118204
59.2473614318296 0.886524822695036
59.2574732396752 0.762411347517731
59.2675850475207 0.673758865248227
59.2776968553662 0.868794326241135
59.2878086632118 0.815602836879433
59.2979204710573 0.803782505910166
59.3080322789028 0.851063829787234
59.3181440867484 0.851063829787234
59.3282558945939 0.815602836879433
59.3383677024394 0.862884160756501
59.348479510285 0.845153664302601
59.3585913181305 0.892434988179669
59.368703125976 0.904255319148936
59.3788149338216 0.774231678486998
59.3889267416671 0.768321513002364
59.3990385495126 0.815602836879433
59.4091503573582 0.845153664302601
59.4192621652037 0.786052009456265
59.4293739730492 0.921985815602837
59.4394857808948 0.756501182033097
59.4495975887403 0.868794326241135
59.4597093965858 0.945626477541371
59.4698212044314 0.945626477541371
59.4799330122769 0.839243498817967
59.4900448201224 0.786052009456265
59.500156627968 0.726950354609929
59.5102684358135 0.809692671394799
59.520380243659 0.874704491725768
59.5304920515046 0.8274231678487
59.5406038593501 0.904255319148936
59.5507156671956 0.868794326241135
59.5608274750412 0.786052009456265
59.5709392828867 0.839243498817967
59.5810510907322 0.862884160756501
59.5911628985778 0.892434988179669
59.6012747064233 0.981087470449173
59.6113865142688 0.726950354609929
59.6214983221143 0.774231678486998
59.6316101299599 0.803782505910166
59.6417219378054 0.945626477541371
59.6518337456509 0.8274231678487
59.6619455534965 0.786052009456265
59.672057361342 0.951536643026005
59.6821691691875 0.862884160756501
59.6922809770331 0.803782505910166
59.7023927848786 0.845153664302601
59.7125045927241 0.839243498817967
59.7226164005697 0.916075650118204
59.7327282084152 0.886524822695036
59.7428400162607 0.898345153664303
59.7529518241063 0.868794326241135
59.7630636319518 0.709219858156029
59.7731754397973 0.892434988179669
59.7832872476429 0.845153664302601
59.7933990554884 0.780141843971631
59.8035108633339 0.874704491725768
59.8136226711795 0.981087470449173
59.823734479025 0.845153664302601
59.8338462868705 0.898345153664303
59.8439580947161 0.933806146572104
59.8540699025616 0.74468085106383
59.8641817104071 0.951536643026005
59.8742935182527 0.803782505910166
59.8844053260982 0.880614657210402
59.8945171339437 0.797872340425532
59.9046289417893 0.821513002364066
59.9147407496348 0.898345153664303
59.9248525574803 0.797872340425532
59.9349643653259 0.791962174940898
59.9450761731714 0.904255319148936
59.9551879810169 0.892434988179669
59.9652997888625 0.815602836879433
59.975411596708 0.851063829787234
59.9855234045535 0.91016548463357
59.9956352123991 0.803782505910166
60.0057470202446 0.821513002364066
60.0158588280901 0.886524822695036
60.0259706359357 0.786052009456265
60.0360824437812 0.921985815602837
60.0461942516267 0.880614657210402
60.0563060594723 0.839243498817967
60.0664178673178 0.791962174940898
60.0765296751633 0.892434988179669
60.0866414830089 0.845153664302601
60.0967532908544 0.862884160756501
60.1068650986999 0.856973995271868
60.1169769065455 0.809692671394799
60.127088714391 0.845153664302601
60.1372005222365 0.803782505910166
60.1473123300821 0.797872340425532
60.1574241379276 1.01063829787234
60.1675359457731 0.921985815602837
60.1776477536187 0.916075650118204
60.1877595614642 1.01654846335697
60.1978713693097 0.780141843971631
60.2079831771553 0.921985815602837
60.2180949850008 0.91016548463357
60.2282067928463 0.780141843971631
60.2383186006919 0.851063829787234
60.2484304085374 0.833333333333333
60.2585422163829 0.91016548463357
60.2686540242285 0.874704491725768
60.278765832074 0.845153664302601
60.2888776399195 0.856973995271868
60.2989894477651 0.709219858156029
60.3091012556106 0.839243498817967
60.3192130634561 0.797872340425532
60.3293248713017 0.756501182033097
60.3394366791472 0.786052009456265
60.3495484869927 0.904255319148936
60.3596602948383 0.939716312056738
60.3697721026838 0.880614657210402
60.3798839105293 0.99290780141844
60.3899957183748 0.786052009456265
60.4001075262204 0.969267139479906
60.4102193340659 0.886524822695036
60.4203311419114 0.809692671394799
60.430442949757 0.951536643026005
60.4405547576025 0.862884160756501
60.450666565448 0.821513002364066
60.4607783732936 0.774231678486998
60.4708901811391 0.851063829787234
60.4810019889846 0.839243498817967
60.4911137968302 0.933806146572104
60.5012256046757 0.8274231678487
60.5113374125212 0.898345153664303
60.5214492203668 0.833333333333333
60.5315610282123 1.05791962174941
60.5416728360578 1.01063829787234
60.5517846439034 0.803782505910166
60.5618964517489 0.703309692671395
60.5720082595944 0.981087470449173
60.58212006744 0.833333333333333
60.5922318752855 0.868794326241135
60.602343683131 0.927895981087471
60.6124554909766 0.726950354609929
60.6225672988221 0.91016548463357
60.6326791066676 0.898345153664303
60.6427909145132 0.839243498817967
60.6529027223587 0.874704491725768
60.6630145302042 0.91016548463357
60.6731263380498 0.809692671394799
60.6832381458953 1.06973995271868
60.6933499537408 0.886524822695036
60.7034617615864 0.975177304964539
60.7135735694319 0.99290780141844
60.7236853772774 0.975177304964539
60.733797185123 0.957446808510638
60.7439089929685 0.921985815602837
60.754020800814 0.916075650118204
60.7641326086596 0.927895981087471
60.7742444165051 0.939716312056738
60.7843562243506 0.921985815602837
60.7944680321962 0.963356973995272
60.8045798400417 0.886524822695036
60.8146916478872 0.8274231678487
60.8248034557328 0.91016548463357
60.8349152635783 0.998817966903074
60.8450270714238 0.939716312056738
60.8551388792694 0.874704491725768
60.8652506871149 1.01063829787234
60.8753624949604 0.933806146572104
60.885474302806 0.845153664302601
60.8955861106515 0.904255319148936
60.905697918497 0.862884160756501
60.9158097263426 0.845153664302601
60.9259215341881 0.898345153664303
60.9360333420336 0.791962174940898
60.9461451498792 0.969267139479906
60.9562569577247 0.868794326241135
60.9663687655702 0.715130023640662
60.9764805734158 0.975177304964539
60.9865923812613 0.851063829787234
60.9967041891068 0.862884160756501
61.0068159969524 0.963356973995272
61.0169278047979 0.933806146572104
61.0270396126434 0.957446808510638
61.037151420489 0.839243498817967
61.0472632283345 0.939716312056738
61.05737503618 0.868794326241135
61.0674868440256 0.898345153664303
61.0775986518711 0.945626477541371
61.0877104597166 0.951536643026005
61.0978222675622 0.839243498817967
61.1079340754077 0.951536643026005
61.1180458832532 0.916075650118204
61.1281576910988 1.01063829787234
61.1382694989443 0.886524822695036
61.1483813067898 0.986997635933806
61.1584931146353 0.862884160756501
61.1686049224809 0.868794326241135
61.1787167303264 0.998817966903074
61.1888285381719 1.01063829787234
61.1989403460175 0.921985815602837
61.209052153863 0.916075650118204
61.2191639617085 0.815602836879433
61.2292757695541 0.975177304964539
61.2393875773996 0.986997635933806
61.2494993852451 0.904255319148936
61.2596111930907 0.969267139479906
61.2697230009362 0.933806146572104
61.2798348087817 0.927895981087471
61.2899466166273 0.986997635933806
61.3000584244728 0.998817966903074
61.3101702323183 0.945626477541371
61.3202820401639 1.03427895981087
61.3303938480094 0.862884160756501
61.3405056558549 0.963356973995272
61.3506174637005 0.856973995271868
61.360729271546 1.05200945626478
61.3708410793915 0.998817966903074
61.3809528872371 1.04018912529551
61.3910646950826 0.892434988179669
61.4011765029281 1.08156028368794
61.4112883107737 0.821513002364066
61.4214001186192 1.01654846335697
61.4315119264647 1.03427895981087
61.4416237343103 0.981087470449173
61.4517355421558 0.91016548463357
61.4618473500013 1.12293144208038
61.4719591578469 0.921985815602837
61.4820709656924 0.945626477541371
61.4921827735379 0.951536643026005
61.5022945813835 1.00472813238771
61.512406389229 0.951536643026005
61.5225181970745 0.862884160756501
61.5326300049201 0.880614657210402
61.5427418127656 1.09338061465721
61.5528536206111 0.957446808510638
61.5629654284567 0.957446808510638
61.5730772363022 0.91016548463357
61.5831890441477 1.00472813238771
61.5933008519933 0.957446808510638
61.6034126598388 0.969267139479906
61.6135244676843 0.998817966903074
61.6236362755299 0.963356973995272
61.6337480833754 0.975177304964539
61.6438598912209 1.07565011820331
61.6539716990665 0.963356973995272
61.664083506912 1.01654846335697
61.6741953147575 1.04018912529551
61.6843071226031 1.01654846335697
61.6944189304486 1.11702127659575
61.7045307382941 1.11111111111111
61.7146425461397 1.03427895981087
61.7247543539852 0.927895981087471
61.7348661618307 1.03427895981087
61.7449779696763 1.08747044917258
61.7550897775218 1.22340425531915
61.7652015853673 1.08156028368794
61.7753133932129 1.09929078014184
61.7854252010584 1.09338061465721
61.7955370089039 1.13475177304965
61.8056488167495 1.20567375886525
61.815760624595 1.08747044917258
61.8258724324405 1.08156028368794
61.8359842402861 1.15839243498818
61.8460960481316 1.02836879432624
61.8562078559771 1.24113475177305
61.8663196638227 1.15248226950355
61.8764314716682 1.07565011820331
61.8865432795137 1.11702127659575
61.8966550873593 1.22931442080378
61.9067668952048 0.986997635933806
61.9168787030503 1.14657210401891
61.9269905108958 1.09338061465721
61.9371023187414 1.13475177304965
61.9472141265869 1.19976359338061
61.9573259344324 1.21158392434988
61.967437742278 1.24704491725768
61.9775495501235 1.09338061465721
61.987661357969 1.19385342789598
61.9977731658146 1.32978723404255
62.0078849736601 1.18203309692671
62.0179967815056 1.25295508274232
62.0281085893512 1.18794326241135
62.0382203971967 1.21749408983452
62.0483322050422 1.15839243498818
62.0584440128878 1.20567375886525
62.0685558207333 1.18203309692671
62.0786676285788 1.25295508274232
62.0887794364244 1.21749408983452
62.0988912442699 1.31796690307329
62.1090030521154 1.38297872340426
62.119114859961 1.24704491725768
62.1292266678065 1.30023640661939
62.139338475652 1.11111111111111
62.1494502834976 1.30023640661939
62.1595620913431 1.27659574468085
62.1696738991886 1.30023640661939
62.1797857070342 1.34160756501182
62.1898975148797 1.26477541371158
62.2000093227252 1.38888888888889
62.2101211305708 1.34160756501182
62.2202329384163 1.30614657210402
62.2303447462618 1.35933806146572
62.2404565541074 1.27068557919622
62.2505683619529 1.46572104018913
62.2606801697984 1.42434988179669
62.270791977644 1.37706855791962
62.2809037854895 1.38297872340426
62.291015593335 1.38297872340426
62.3011274011806 1.35933806146572
62.3112392090261 1.28841607565012
62.3213510168716 1.46572104018913
62.3314628247172 1.45390070921986
62.3415746325627 1.41843971631206
62.3516864404082 1.32978723404255
62.3617982482538 1.51300236406619
62.3719100560993 1.43617021276596
62.3820218639448 1.38297872340426
62.3921336717904 1.38297872340426
62.4022454796359 1.54255319148936
62.4123572874814 1.48936170212766
62.422469095327 1.47754137115839
62.4325809031725 1.50118203309693
62.442692711018 1.40661938534279
62.4528045188636 1.51300236406619
62.4629163267091 1.548463356974
62.4730281345546 1.548463356974
62.4831399424002 1.50118203309693
62.4932517502457 1.44799054373522
62.5033635580912 1.6193853427896
62.5134753659368 1.55437352245863
62.5235871737823 1.47163120567376
62.5336989816278 1.37115839243499
62.5438107894734 1.48936170212766
62.5539225973189 1.50709219858156
62.5640344051644 1.54255319148936
62.57414621301 1.50118203309693
62.5842580208555 1.48345153664303
62.594369828701 1.6371158392435
62.6044816365466 1.71394799054374
62.6145934443921 1.57801418439716
62.6247052522376 1.68439716312057
62.6348170600832 1.66666666666667
62.6449288679287 1.548463356974
62.6550406757742 1.6903073286052
62.6651524836198 1.56028368794326
62.6752642914653 1.6725768321513
62.6853760993108 1.6371158392435
62.6954879071563 1.50709219858156
62.7055997150019 1.7080378250591
62.7157115228474 1.6193853427896
62.7258233306929 1.6016548463357
62.7359351385385 1.64302600472813
62.746046946384 1.56028368794326
62.7561587542295 1.48345153664303
62.7662705620751 1.52482269503546
62.7763823699206 1.62529550827423
62.7864941777661 1.6193853427896
62.7966059856117 1.64302600472813
62.8067177934572 1.5839243498818
62.8168296013027 1.48345153664303
62.8269414091483 1.53073286052009
62.8370532169938 1.548463356974
62.8471650248393 1.62529550827423
62.8572768326849 1.64893617021277
62.8673886405304 1.56028368794326
62.8775004483759 1.53664302600473
62.8876122562215 1.7434988179669
62.897724064067 1.59574468085106
62.9078358719125 1.74940898345154
62.9179476797581 1.66666666666667
62.9280594876036 1.67848699763593
62.9381712954491 1.71394799054374
62.9482831032947 1.46572104018913
62.9583949111402 1.57801418439716
62.9685067189857 1.52482269503546
62.9786185268313 1.57801418439716
62.9887303346768 1.62529550827423
62.9988421425223 1.60756501182033
63.0089539503679 1.47163120567376
63.0190657582134 1.5839243498818
63.0291775660589 1.51300236406619
63.0392893739045 1.68439716312057
63.04940118175 1.53664302600473
63.0595129895955 1.55437352245863
63.0696247974411 1.5839243498818
63.0797366052866 1.548463356974
63.0898484131321 1.6371158392435
63.0999602209777 1.44208037825059
63.1100720288232 1.43617021276596
63.1201838366687 1.56028368794326
63.1302956445143 1.41252955082742
63.1404074523598 1.55437352245863
63.1505192602053 1.6016548463357
63.1606310680509 1.57210401891253
63.1707428758964 1.40661938534279
63.1808546837419 1.52482269503546
63.1909664915875 1.40070921985816
63.201078299433 1.48936170212766
63.2111901072785 1.53073286052009
63.2213019151241 1.53073286052009
63.2314137229696 1.40661938534279
63.2415255308151 1.5839243498818
63.2516373386607 1.51891252955083
63.2617491465062 1.41252955082742
63.2718609543517 1.41843971631206
63.2819727621973 1.44799054373522
63.2920845700428 1.39479905437352
63.3021963778883 1.40070921985816
63.3123081857339 1.35933806146572
63.3224199935794 1.38888888888889
63.3325318014249 1.38297872340426
63.3426436092705 1.42434988179669
63.352755417116 1.47754137115839
63.3628672249615 1.43617021276596
63.3729790328071 1.46572104018913
63.3830908406526 1.45390070921986
63.3932026484981 1.27068557919622
63.4033144563437 1.34160756501182
63.4134262641892 1.36524822695035
63.4235380720347 1.27068557919622
63.4336498798803 1.40661938534279
63.4437616877258 1.27068557919622
63.4538734955713 1.35933806146572
63.4639853034168 1.41252955082742
63.4740971112624 1.28841607565012
63.4842089191079 1.43026004728132
63.4943207269534 1.16430260047281
63.504432534799 1.19385342789598
63.5145443426445 1.27659574468085
63.52465615049 1.45981087470449
63.5347679583356 1.36524822695035
63.5448797661811 1.32387706855792
63.5549915740266 1.25886524822695
63.5651033818722 1.22931442080378
63.5752151897177 1.24113475177305
63.5853269975632 1.14657210401891
63.5954388054088 1.19385342789598
63.6055506132543 1.20567375886525
63.6156624210998 1.34160756501182
63.6257742289454 1.22931442080378
63.6358860367909 1.32978723404255
63.6459978446364 1.25295508274232
63.656109652482 1.19385342789598
63.6662214603275 1.11111111111111
63.676333268173 1.18794326241135
63.6864450760186 1.22340425531915
63.6965568838641 1.04018912529551
63.7066686917096 1.05791962174941
63.7167804995552 1.17021276595745
63.7268923074007 1.32978723404255
63.7370041152462 1.02245862884161
63.7471159230918 1.08747044917258
63.7572277309373 1.13475177304965
63.7673395387828 1.13475177304965
63.7774513466284 1.06973995271868
63.7875631544739 1.12293144208038
63.7976749623194 1.28841607565012
63.807786770165 1.19385342789598
63.8178985780105 1.08156028368794
63.828010385856 0.99290780141844
63.8381221937016 1.17612293144208
63.8482340015471 1.06382978723404
63.8583458093926 1.12293144208038
63.8684576172382 0.969267139479906
63.8785694250837 0.969267139479906
63.8886812329292 1.10520094562648
63.8987930407748 0.975177304964539
63.9089048486203 1.04609929078014
63.9190166564658 0.986997635933806
63.9291284643114 1.06382978723404
63.9392402721569 1.06382978723404
63.9493520800024 0.986997635933806
63.959463887848 0.969267139479906
63.9695756956935 0.933806146572104
63.979687503539 1.12293144208038
63.9897993113846 1.09338061465721
63.9999111192301 0.998817966903074
64.0100229270756 0.933806146572104
64.0201347349212 1.05791962174941
64.0302465427667 0.880614657210402
64.0403583506122 1.01063829787234
64.0504701584578 0.963356973995272
64.0605819663033 1.00472813238771
64.0706937741488 0.945626477541371
64.0808055819944 0.898345153664303
64.0909173898399 0.998817966903074
64.1010291976854 0.981087470449173
64.111141005531 0.927895981087471
64.1212528133765 0.945626477541371
64.131364621222 0.874704491725768
64.1414764290676 0.898345153664303
64.1515882369131 0.963356973995272
64.1617000447586 0.933806146572104
64.1718118526042 0.969267139479906
64.1819236604497 0.927895981087471
64.1920354682952 1.05200945626478
64.2021472761407 0.904255319148936
64.2122590839863 0.738770685579196
64.2223708918318 0.833333333333333
64.2324826996773 0.951536643026005
64.2425945075229 0.957446808510638
64.2527063153684 0.874704491725768
64.2628181232139 0.927895981087471
64.2729299310595 1.01063829787234
64.283041738905 0.821513002364066
64.2931535467505 0.916075650118204
64.3032653545961 0.892434988179669
64.3133771624416 0.862884160756501
64.3234889702871 0.862884160756501
64.3336007781327 0.815602836879433
64.3437125859782 0.774231678486998
64.3538243938237 0.957446808510638
64.3639362016693 0.939716312056738
64.3740480095148 0.874704491725768
64.3841598173603 0.856973995271868
64.3942716252059 0.91016548463357
64.4043834330514 0.709219858156029
64.4144952408969 0.880614657210402
64.4246070487425 0.945626477541371
64.434718856588 0.780141843971631
64.4448306644335 0.862884160756501
64.4549424722791 0.851063829787234
64.4650542801246 0.916075650118204
64.4751660879701 0.786052009456265
64.4852778958157 0.851063829787234
64.4953897036612 0.921985815602837
64.5055015115067 0.8274231678487
64.5156133193523 0.874704491725768
64.5257251271978 0.856973995271868
64.5358369350433 0.957446808510638
64.5459487428889 0.892434988179669
64.5560605507344 0.8274231678487
64.5661723585799 0.74468085106383
64.5762841664255 0.768321513002364
64.586395974271 0.756501182033097
64.5965077821165 0.768321513002364
64.6066195899621 0.756501182033097
64.6167313978076 0.815602836879433
64.6268432056531 0.851063829787234
64.6369550134987 0.691489361702128
64.6470668213442 0.851063829787234
64.6571786291897 0.715130023640662
64.6672904370353 0.833333333333333
64.6774022448808 0.803782505910166
64.6875140527263 0.791962174940898
64.6976258605719 0.74468085106383
64.7077376684174 0.780141843971631
64.7178494762629 0.791962174940898
64.7279612841085 0.756501182033097
64.738073091954 0.780141843971631
64.7481848997995 0.709219858156029
64.7582967076451 0.8274231678487
64.7684085154906 0.809692671394799
64.7785203233361 0.768321513002364
64.7886321311817 0.721040189125296
64.7987439390272 0.868794326241135
64.8088557468727 0.833333333333333
64.8189675547183 0.768321513002364
64.8290793625638 0.768321513002364
64.8391911704093 0.762411347517731
64.8493029782549 0.780141843971631
64.8594147861004 0.715130023640662
64.8695265939459 0.738770685579196
64.8796384017915 0.839243498817967
64.889750209637 0.774231678486998
64.8998620174825 0.774231678486998
64.9099738253281 0.656028368794326
64.9200856331736 0.709219858156029
64.9301974410191 0.821513002364066
64.9403092488647 0.66193853427896
64.9504210567102 0.786052009456265
64.9605328645557 0.679669030732861
64.9706446724012 0.721040189125296
64.9807564802468 0.738770685579196
64.9908682880923 0.768321513002364
65.0009800959378 0.768321513002364
65.0110919037834 0.721040189125296
65.0212037116289 0.644208037825059
65.0313155194744 0.656028368794326
65.04142732732 0.703309692671395
65.0515391351655 0.768321513002364
65.061650943011 0.726950354609929
65.0717627508566 0.774231678486998
65.0818745587021 0.656028368794326
65.0919863665476 0.809692671394799
65.1020981743932 0.762411347517731
65.1122099822387 0.608747044917258
65.1223217900842 0.656028368794326
65.1324335979298 0.685579196217494
65.1425454057753 0.821513002364066
65.1526572136208 0.691489361702128
65.1627690214664 0.721040189125296
65.1728808293119 0.768321513002364
65.1829926371574 0.74468085106383
65.193104445003 0.780141843971631
65.2032162528485 0.768321513002364
65.213328060694 0.780141843971631
65.2234398685396 0.667848699763593
65.2335516763851 0.74468085106383
65.2436634842306 0.738770685579196
65.2537752920762 0.691489361702128
65.2638870999217 0.774231678486998
65.2739989077672 0.721040189125296
65.2841107156128 0.845153664302601
65.2942225234583 0.768321513002364
65.3043343313038 0.679669030732861
65.3144461391494 0.709219858156029
65.3245579469949 0.709219858156029
65.3346697548404 0.626477541371159
65.344781562686 0.66193853427896
65.3548933705315 0.732860520094563
65.365005178377 0.74468085106383
65.3751169862226 0.644208037825059
65.3852287940681 0.750591016548463
65.3953406019136 0.762411347517731
65.4054524097592 0.74468085106383
65.4155642176047 0.703309692671395
65.4256760254502 0.703309692671395
65.4357878332958 0.74468085106383
65.4458996411413 0.762411347517731
65.4560114489868 0.74468085106383
65.4661232568324 0.732860520094563
65.4762350646779 0.685579196217494
65.4863468725234 0.667848699763593
65.496458680369 0.726950354609929
65.5065704882145 0.703309692671395
65.51668229606 0.650118203309693
65.5267941039056 0.797872340425532
65.5369059117511 0.691489361702128
65.5470177195966 0.667848699763593
65.5571295274422 0.685579196217494
65.5672413352877 0.732860520094563
65.5773531431332 0.762411347517731
65.5874649509788 0.632387706855792
65.5975767588243 0.709219858156029
65.6076885666698 0.809692671394799
65.6178003745154 0.74468085106383
65.6279121823609 0.750591016548463
65.6380239902064 0.768321513002364
65.648135798052 0.74468085106383
65.6582476058975 0.768321513002364
65.668359413743 0.786052009456265
65.6784712215886 0.608747044917258
65.6885830294341 0.762411347517731
65.6986948372796 0.691489361702128
65.7088066451252 0.762411347517731
65.7189184529707 0.791962174940898
65.7290302608162 0.691489361702128
65.7391420686617 0.620567375886525
65.7492538765073 0.762411347517731
65.7593656843528 0.632387706855792
65.7694774921983 0.679669030732861
65.7795893000439 0.626477541371159
65.7897011078894 0.703309692671395
65.7998129157349 0.608747044917258
65.8099247235805 0.74468085106383
65.820036531426 0.703309692671395
65.8301483392715 0.732860520094563
65.8402601471171 0.650118203309693
65.8503719549626 0.673758865248227
65.8604837628081 0.644208037825059
65.8705955706537 0.691489361702128
65.8807073784992 0.715130023640662
65.8908191863447 0.573286052009456
65.9009309941903 0.768321513002364
65.9110428020358 0.638297872340426
65.9211546098813 0.703309692671395
65.9312664177269 0.673758865248227
65.9413782255724 0.608747044917258
65.9514900334179 0.567375886524823
65.9616018412635 0.626477541371159
65.971713649109 0.685579196217494
65.9818254569545 0.585106382978724
65.9919372648001 0.656028368794326
66.0020490726456 0.602836879432624
66.0121608804911 0.679669030732861
66.0222726883367 0.791962174940898
66.0323844961822 0.697399527186761
66.0424963040277 0.703309692671395
66.0526081118733 0.697399527186761
66.0627199197188 0.650118203309693
66.0728317275643 0.644208037825059
66.0829435354099 0.620567375886525
66.0930553432554 0.709219858156029
66.1031671511009 0.644208037825059
66.1132789589465 0.691489361702128
66.123390766792 0.732860520094563
66.1335025746375 0.715130023640662
66.1436143824831 0.721040189125296
66.1537261903286 0.703309692671395
66.1638379981741 0.709219858156029
66.1739498060197 0.673758865248227
66.1840616138652 0.715130023640662
66.1941734217107 0.602836879432624
66.2042852295563 0.803782505910166
66.2143970374018 0.721040189125296
66.2245088452473 0.626477541371159
66.2346206530929 0.638297872340426
66.2447324609384 0.543735224586288
66.2548442687839 0.656028368794326
66.2649560766295 0.602836879432624
66.275067884475 0.750591016548463
66.2851796923205 0.66193853427896
66.2952915001661 0.585106382978724
66.3054033080116 0.697399527186761
66.3155151158571 0.614657210401891
66.3256269237027 0.632387706855792
66.3357387315482 0.721040189125296
66.3458505393937 0.656028368794326
66.3559623472393 0.673758865248227
66.3660741550848 0.691489361702128
66.3761859629303 0.780141843971631
66.3862977707759 0.709219858156029
66.3964095786214 0.608747044917258
66.4065213864669 0.74468085106383
66.4166331943125 0.596926713947991
66.426745002158 0.697399527186761
66.4368568100035 0.673758865248227
66.4469686178491 0.57919621749409
66.4570804256946 0.738770685579196
66.4671922335401 0.602836879432624
66.4773040413857 0.644208037825059
66.4874158492312 0.667848699763593
66.4975276570767 0.573286052009456
66.5076394649222 0.721040189125296
66.5177512727678 0.644208037825059
66.5278630806133 0.74468085106383
66.5379748884588 0.632387706855792
66.5480866963044 0.608747044917258
66.5581985041499 0.756501182033097
66.5683103119954 0.632387706855792
66.578422119841 0.66193853427896
66.5885339276865 0.555555555555556
66.598645735532 0.596926713947991
66.6087575433776 0.685579196217494
66.6188693512231 0.74468085106383
66.6289811590686 0.526004728132388
66.6390929669142 0.697399527186761
66.6492047747597 0.691489361702128
66.6593165826052 0.697399527186761
66.6694283904508 0.514184397163121
66.6795401982963 0.673758865248227
66.6896520061418 0.697399527186761
66.6997638139874 0.691489361702128
66.7098756218329 0.626477541371159
66.7199874296784 0.726950354609929
66.730099237524 0.632387706855792
66.7402110453695 0.644208037825059
66.750322853215 0.66193853427896
66.7604346610606 0.697399527186761
66.7705464689061 0.679669030732861
66.7806582767516 0.721040189125296
66.7907700845972 0.685579196217494
66.8008818924427 0.549645390070922
66.8109937002882 0.614657210401891
66.8211055081338 0.591016548463357
66.8312173159793 0.703309692671395
66.8413291238248 0.596926713947991
66.8514409316704 0.626477541371159
66.8615527395159 0.644208037825059
66.8716645473614 0.638297872340426
66.881776355207 0.561465721040189
66.8918881630525 0.543735224586288
66.901999970898 0.573286052009456
66.9121117787436 0.614657210401891
66.9222235865891 0.644208037825059
66.9323353944346 0.656028368794326
66.9424472022802 0.667848699763593
66.9525590101257 0.697399527186761
66.9626708179712 0.656028368794326
66.9727826258168 0.602836879432624
66.9828944336623 0.57919621749409
66.9930062415078 0.626477541371159
67.0031180493534 0.650118203309693
67.0132298571989 0.632387706855792
67.0233416650444 0.768321513002364
67.03345347289 0.602836879432624
67.0435652807355 0.591016548463357
67.053677088581 0.709219858156029
67.0637888964266 0.626477541371159
67.0739007042721 0.591016548463357
67.0840125121176 0.650118203309693
67.0941243199632 0.709219858156029
67.1042361278087 0.614657210401891
67.1143479356542 0.531914893617021
67.1244597434998 0.697399527186761
67.1345715513453 0.715130023640662
67.1446833591908 0.644208037825059
67.1547951670364 0.667848699763593
67.1649069748819 0.697399527186761
67.1750187827274 0.632387706855792
67.185130590573 0.620567375886525
67.1952423984185 0.703309692671395
67.205354206264 0.650118203309693
67.2154660141096 0.66193853427896
67.2255778219551 0.738770685579196
67.2356896298006 0.602836879432624
67.2458014376462 0.567375886524823
67.2559132454917 0.738770685579196
67.2660250533372 0.596926713947991
67.2761368611827 0.620567375886525
67.2862486690283 0.602836879432624
67.2963604768738 0.596926713947991
67.3064722847193 0.608747044917258
67.3165840925649 0.614657210401891
67.3266959004104 0.656028368794326
67.3368077082559 0.484633569739953
67.3469195161015 0.614657210401891
67.357031323947 0.57919621749409
67.3671431317925 0.602836879432624
67.3772549396381 0.608747044917258
67.3873667474836 0.531914893617021
67.3974785553291 0.602836879432624
67.4075903631747 0.549645390070922
67.4177021710202 0.632387706855792
67.4278139788657 0.715130023640662
67.4379257867113 0.514184397163121
67.4480375945568 0.620567375886525
67.4581494024023 0.614657210401891
67.4682612102479 0.585106382978724
67.4783730180934 0.602836879432624
67.4884848259389 0.66193853427896
67.4985966337845 0.567375886524823
67.50870844163 0.537825059101655
67.5188202494755 0.614657210401891
67.5289320573211 0.549645390070922
67.5390438651666 0.626477541371159
67.5491556730121 0.57919621749409
67.5592674808577 0.620567375886525
67.5693792887032 0.484633569739953
67.5794910965487 0.703309692671395
67.5896029043943 0.673758865248227
67.5997147122398 0.667848699763593
67.6098265200853 0.626477541371159
67.6199383279309 0.573286052009456
67.6300501357764 0.608747044917258
67.6401619436219 0.502364066193853
67.6502737514675 0.608747044917258
67.660385559313 0.644208037825059
67.6704973671585 0.57919621749409
67.6806091750041 0.608747044917258
67.6907209828496 0.531914893617021
67.7008327906951 0.632387706855792
67.7109445985407 0.585106382978724
67.7210564063862 0.608747044917258
67.7311682142317 0.608747044917258
67.7412800220773 0.656028368794326
67.7513918299228 0.667848699763593
67.7615036377683 0.602836879432624
67.7716154456139 0.573286052009456
67.7817272534594 0.650118203309693
67.7918390613049 0.49645390070922
67.8019508691505 0.573286052009456
67.812062676996 0.561465721040189
67.8221744848415 0.602836879432624
67.8322862926871 0.673758865248227
67.8423981005326 0.57919621749409
67.8525099083781 0.596926713947991
67.8626217162237 0.602836879432624
67.8727335240692 0.626477541371159
67.8828453319147 0.632387706855792
67.8929571397603 0.703309692671395
67.9030689476058 0.514184397163121
67.9131807554513 0.537825059101655
67.9232925632969 0.537825059101655
67.9334043711424 0.656028368794326
67.9435161789879 0.620567375886525
67.9536279868335 0.644208037825059
67.963739794679 0.638297872340426
67.9738516025245 0.644208037825059
67.9839634103701 0.768321513002364
67.9940752182156 0.596926713947991
68.0041870260611 0.573286052009456
68.0142988339067 0.585106382978724
68.0244106417522 0.567375886524823
68.0345224495977 0.602836879432624
68.0446342574432 0.620567375886525
68.0547460652888 0.626477541371159
68.0648578731343 0.614657210401891
68.0749696809798 0.508274231678487
68.0850814888254 0.602836879432624
68.0951932966709 0.585106382978724
68.1053051045164 0.585106382978724
68.115416912362 0.478723404255319
68.1255287202075 0.585106382978724
68.135640528053 0.561465721040189
68.1457523358986 0.472813238770686
68.1558641437441 0.596926713947991
68.1659759515896 0.632387706855792
68.1760877594352 0.644208037825059
68.1861995672807 0.531914893617021
68.1963113751262 0.644208037825059
68.2064231829718 0.514184397163121
68.2165349908173 0.626477541371159
68.2266467986628 0.57919621749409
68.2367586065084 0.561465721040189
68.2468704143539 0.673758865248227
68.2569822221994 0.667848699763593
68.267094030045 0.74468085106383
68.2772058378905 0.614657210401891
68.287317645736 0.638297872340426
68.2974294535816 0.390070921985816
68.3075412614271 0.638297872340426
68.3176530692726 0.608747044917258
68.3277648771182 0.514184397163121
68.3378766849637 0.626477541371159
68.3479884928092 0.602836879432624
68.3581003006548 0.620567375886525
68.3682121085003 0.520094562647754
68.3783239163458 0.685579196217494
68.3884357241914 0.596926713947991
68.3985475320369 0.638297872340426
68.4086593398824 0.49645390070922
68.418771147728 0.425531914893617
68.4288829555735 0.573286052009456
68.438994763419 0.608747044917258
68.4491065712646 0.478723404255319
68.4592183791101 0.567375886524823
68.4693301869556 0.644208037825059
68.4794419948012 0.543735224586288
68.4895538026467 0.555555555555556
68.4996656104922 0.620567375886525
68.5097774183378 0.638297872340426
68.5198892261833 0.591016548463357
68.5300010340288 0.514184397163121
68.5401128418744 0.537825059101655
68.5502246497199 0.673758865248227
68.5603364575654 0.656028368794326
68.570448265411 0.526004728132388
68.5805600732565 0.567375886524823
68.590671881102 0.484633569739953
68.6007836889476 0.638297872340426
68.6108954967931 0.502364066193853
68.6210073046386 0.638297872340426
68.6311191124842 0.608747044917258
68.6412309203297 0.443262411347518
68.6513427281752 0.526004728132388
68.6614545360208 0.549645390070922
68.6715663438663 0.626477541371159
68.6816781517118 0.691489361702128
68.6917899595574 0.573286052009456
68.7019017674029 0.66193853427896
68.7120135752484 0.531914893617021
68.722125383094 0.638297872340426
68.7322371909395 0.57919621749409
68.742348998785 0.561465721040189
68.7524608066306 0.531914893617021
68.7625726144761 0.644208037825059
68.7726844223216 0.508274231678487
68.7827962301672 0.57919621749409
68.7929080380127 0.561465721040189
68.8030198458582 0.608747044917258
68.8131316537037 0.57919621749409
68.8232434615493 0.549645390070922
68.8333552693948 0.555555555555556
68.8434670772403 0.620567375886525
68.8535788850859 0.638297872340426
68.8636906929314 0.585106382978724
68.8738025007769 0.549645390070922
68.8839143086225 0.573286052009456
68.894026116468 0.531914893617021
68.9041379243135 0.543735224586288
68.9142497321591 0.526004728132388
68.9243615400046 0.561465721040189
68.9344733478501 0.591016548463357
68.9445851556957 0.472813238770686
68.9546969635412 0.407801418439716
68.9648087713867 0.608747044917258
68.9749205792323 0.573286052009456
68.9850323870778 0.638297872340426
68.9951441949233 0.514184397163121
69.0052560027689 0.585106382978724
69.0153678106144 0.620567375886525
69.0254796184599 0.555555555555556
69.0355914263055 0.484633569739953
69.045703234151 0.620567375886525
69.0558150419965 0.585106382978724
69.0659268498421 0.543735224586288
69.0760386576876 0.567375886524823
69.0861504655331 0.656028368794326
69.0962622733787 0.549645390070922
69.1063740812242 0.573286052009456
69.1164858890697 0.750591016548463
69.1265976969153 0.602836879432624
69.1367095047608 0.632387706855792
69.1468213126063 0.460992907801419
69.1569331204519 0.514184397163121
69.1670449282974 0.591016548463357
69.1771567361429 0.585106382978724
69.1872685439885 0.596926713947991
69.197380351834 0.66193853427896
69.2074921596795 0.585106382978724
69.2176039675251 0.520094562647754
69.2277157753706 0.49645390070922
69.2378275832161 0.537825059101655
69.2479393910617 0.549645390070922
69.2580511989072 0.585106382978724
69.2681630067527 0.543735224586288
69.2782748145983 0.531914893617021
69.2883866224438 0.596926713947991
69.2984984302893 0.520094562647754
69.3086102381349 0.644208037825059
69.3187220459804 0.49645390070922
69.3288338538259 0.549645390070922
69.3389456616715 0.638297872340426
69.349057469517 0.626477541371159
69.3591692773625 0.514184397163121
69.3692810852081 0.57919621749409
69.3793928930536 0.537825059101655
69.3895047008991 0.520094562647754
69.3996165087447 0.638297872340426
69.4097283165902 0.514184397163121
69.4198401244357 0.602836879432624
69.4299519322813 0.614657210401891
69.4400637401268 0.697399527186761
69.4501755479723 0.514184397163121
69.4602873558179 0.602836879432624
69.4703991636634 0.638297872340426
69.4805109715089 0.573286052009456
69.4906227793545 0.502364066193853
69.5007345872 0.608747044917258
69.5108463950455 0.549645390070922
69.5209582028911 0.585106382978724
69.5310700107366 0.520094562647754
69.5411818185821 0.591016548463357
69.5512936264277 0.484633569739953
69.5614054342732 0.526004728132388
69.5715172421187 0.449172576832151
69.5816290499642 0.608747044917258
69.5917408578098 0.502364066193853
69.6018526656553 0.478723404255319
69.6119644735008 0.466903073286052
69.6220762813464 0.608747044917258
69.6321880891919 0.472813238770686
69.6422998970374 0.543735224586288
69.652411704883 0.543735224586288
69.6625235127285 0.531914893617021
69.672635320574 0.620567375886525
69.6827471284196 0.526004728132388
69.6928589362651 0.679669030732861
69.7029707441106 0.537825059101655
69.7130825519562 0.526004728132388
69.7231943598017 0.543735224586288
69.7333061676472 0.514184397163121
69.7434179754928 0.478723404255319
69.7535297833383 0.591016548463357
69.7636415911838 0.596926713947991
69.7737533990294 0.490543735224586
69.7838652068749 0.514184397163121
69.7939770147204 0.520094562647754
69.804088822566 0.520094562647754
69.8142006304115 0.537825059101655
69.824312438257 0.596926713947991
69.8344242461026 0.608747044917258
69.8445360539481 0.531914893617021
69.8546478617936 0.514184397163121
69.8647596696392 0.537825059101655
69.8748714774847 0.585106382978724
69.8849832853302 0.626477541371159
69.8950950931758 0.66193853427896
69.9052069010213 0.472813238770686
69.9153187088668 0.596926713947991
69.9254305167124 0.478723404255319
69.9355423245579 0.543735224586288
69.9456541324034 0.57919621749409
69.955765940249 0.602836879432624
69.9658777480945 0.614657210401891
69.97598955594 0.526004728132388
69.9861013637856 0.573286052009456
69.9962131716311 0.526004728132388
70.0063249794766 0.715130023640662
70.0164367873222 0.549645390070922
70.0265485951677 0.514184397163121
70.0366604030132 0.591016548463357
70.0467722108588 0.644208037825059
70.0568840187043 0.638297872340426
70.0669958265498 0.567375886524823
70.0771076343954 0.57919621749409
70.0872194422409 0.531914893617021
70.0973312500864 0.596926713947991
70.107443057932 0.567375886524823
70.1175548657775 0.57919621749409
70.127666673623 0.632387706855792
70.1377784814686 0.395981087470449
70.1478902893141 0.721040189125296
70.1580020971596 0.490543735224586
70.1681139050052 0.484633569739953
70.1782257128507 0.514184397163121
70.1883375206962 0.537825059101655
70.1984493285418 0.585106382978724
70.2085611363873 0.49645390070922
70.2186729442328 0.608747044917258
70.2287847520784 0.561465721040189
70.2388965599239 0.591016548463357
70.2490083677694 0.561465721040189
70.259120175615 0.567375886524823
70.2692319834605 0.591016548463357
70.279343791306 0.620567375886525
70.2894555991516 0.543735224586288
70.2995674069971 0.549645390070922
70.3096792148426 0.472813238770686
70.3197910226882 0.531914893617021
70.3299028305337 0.555555555555556
70.3400146383792 0.644208037825059
70.3501264462247 0.614657210401891
70.3602382540703 0.620567375886525
70.3703500619158 0.543735224586288
70.3804618697613 0.49645390070922
70.3905736776069 0.508274231678487
70.4006854854524 0.585106382978724
70.4107972932979 0.585106382978724
70.4209091011435 0.478723404255319
70.431020908989 0.602836879432624
70.4411327168345 0.537825059101655
70.4512445246801 0.57919621749409
70.4613563325256 0.555555555555556
70.4714681403711 0.537825059101655
70.4815799482167 0.626477541371159
70.4916917560622 0.591016548463357
70.5018035639077 0.596926713947991
70.5119153717533 0.555555555555556
70.5220271795988 0.57919621749409
70.5321389874443 0.531914893617021
70.5422507952899 0.620567375886525
70.5523626031354 0.673758865248227
70.5624744109809 0.596926713947991
70.5725862188265 0.608747044917258
70.582698026672 0.614657210401891
70.5928098345175 0.514184397163121
70.6029216423631 0.520094562647754
70.6130334502086 0.490543735224586
70.6231452580541 0.460992907801419
70.6332570658997 0.57919621749409
70.6433688737452 0.508274231678487
70.6534806815907 0.620567375886525
70.6635924894363 0.57919621749409
70.6737042972818 0.567375886524823
70.6838161051273 0.531914893617021
70.6939279129729 0.484633569739953
70.7040397208184 0.608747044917258
70.7141515286639 0.549645390070922
70.7242633365095 0.514184397163121
70.734375144355 0.614657210401891
70.7444869522005 0.526004728132388
70.7545987600461 0.608747044917258
70.7647105678916 0.585106382978724
70.7748223757371 0.638297872340426
70.7849341835827 0.555555555555556
70.7950459914282 0.49645390070922
70.8051577992737 0.520094562647754
70.8152696071193 0.57919621749409
70.8253814149648 0.484633569739953
70.8354932228103 0.567375886524823
70.8456050306559 0.591016548463357
70.8557168385014 0.526004728132388
70.8658286463469 0.620567375886525
70.8759404541925 0.620567375886525
70.886052262038 0.543735224586288
70.8961640698835 0.567375886524823
70.9062758777291 0.703309692671395
70.9163876855746 0.57919621749409
70.9264994934201 0.608747044917258
70.9366113012657 0.697399527186761
70.9467231091112 0.502364066193853
70.9568349169567 0.567375886524823
70.9669467248023 0.638297872340426
70.9770585326478 0.679669030732861
70.9871703404933 0.490543735224586
70.9972821483389 0.561465721040189
71.0073939561844 0.626477541371159
71.0175057640299 0.608747044917258
71.0276175718755 0.697399527186761
71.037729379721 0.508274231678487
71.0478411875665 0.697399527186761
71.0579529954121 0.502364066193853
71.0680648032576 0.626477541371159
71.0781766111031 0.573286052009456
71.0882884189487 0.585106382978724
71.0984002267942 0.466903073286052
71.1085120346397 0.585106382978724
71.1186238424852 0.49645390070922
71.1287356503308 0.573286052009456
71.1388474581763 0.561465721040189
71.1489592660218 0.632387706855792
71.1590710738674 0.596926713947991
71.1691828817129 0.484633569739953
71.1792946895584 0.650118203309693
71.189406497404 0.614657210401891
71.1995183052495 0.549645390070922
71.209630113095 0.549645390070922
71.2197419209406 0.626477541371159
71.2298537287861 0.573286052009456
71.2399655366316 0.632387706855792
71.2500773444772 0.585106382978724
71.2601891523227 0.602836879432624
71.2703009601682 0.573286052009456
71.2804127680138 0.537825059101655
71.2905245758593 0.573286052009456
71.3006363837048 0.543735224586288
71.3107481915504 0.526004728132388
71.3208599993959 0.656028368794326
71.3309718072414 0.526004728132388
71.341083615087 0.614657210401891
71.3511954229325 0.537825059101655
71.361307230778 0.537825059101655
71.3714190386236 0.567375886524823
71.3815308464691 0.573286052009456
71.3916426543146 0.632387706855792
71.4017544621602 0.472813238770686
71.4118662700057 0.425531914893617
71.4219780778512 0.591016548463357
71.4320898856968 0.543735224586288
71.4422016935423 0.526004728132388
71.4523135013878 0.561465721040189
71.4624253092334 0.543735224586288
71.4725371170789 0.626477541371159
71.4826489249244 0.608747044917258
71.49276073277 0.549645390070922
71.5028725406155 0.537825059101655
71.512984348461 0.650118203309693
71.5230961563066 0.549645390070922
71.5332079641521 0.526004728132388
71.5433197719976 0.596926713947991
71.5534315798432 0.555555555555556
71.5635433876887 0.602836879432624
71.5736551955342 0.656028368794326
71.5837670033798 0.57919621749409
71.5938788112253 0.626477541371159
71.6039906190708 0.514184397163121
71.6141024269164 0.602836879432624
71.6242142347619 0.520094562647754
71.6343260426074 0.537825059101655
71.644437850453 0.437352245862884
71.6545496582985 0.520094562647754
71.664661466144 0.567375886524823
71.6747732739896 0.57919621749409
71.6848850818351 0.526004728132388
71.6949968896806 0.549645390070922
71.7051086975262 0.591016548463357
71.7152205053717 0.526004728132388
71.7253323132172 0.449172576832151
71.7354441210628 0.591016548463357
71.7455559289083 0.632387706855792
71.7556677367538 0.602836879432624
71.7657795445994 0.602836879432624
71.7758913524449 0.602836879432624
71.7860031602904 0.478723404255319
71.796114968136 0.632387706855792
71.8062267759815 0.614657210401891
71.816338583827 0.638297872340426
71.8264503916726 0.567375886524823
71.8365621995181 0.549645390070922
71.8466740073636 0.537825059101655
71.8567858152092 0.591016548463357
71.8668976230547 0.638297872340426
71.8770094309002 0.650118203309693
71.8871212387457 0.561465721040189
71.8972330465913 0.520094562647754
71.9073448544368 0.567375886524823
71.9174566622823 0.632387706855792
71.9275684701279 0.490543735224586
71.9376802779734 0.57919621749409
71.9477920858189 0.656028368794326
71.9579038936645 0.460992907801419
71.96801570151 0.561465721040189
71.9781275093555 0.602836879432624
71.9882393172011 0.656028368794326
71.9983511250466 0.514184397163121
72.0084629328921 0.614657210401891
72.0185747407377 0.561465721040189
72.0286865485832 0.437352245862884
72.0387983564287 0.490543735224586
72.0489101642743 0.490543735224586
72.0590219721198 0.620567375886525
72.0691337799653 0.543735224586288
72.0792455878109 0.608747044917258
72.0893573956564 0.502364066193853
72.0994692035019 0.531914893617021
72.1095810113475 0.561465721040189
72.119692819193 0.656028368794326
72.1298046270385 0.543735224586288
72.1399164348841 0.431442080378251
72.1500282427296 0.549645390070922
72.1601400505751 0.596926713947991
72.1702518584207 0.549645390070922
72.1803636662662 0.644208037825059
72.1904754741117 0.543735224586288
72.2005872819573 0.549645390070922
72.2106990898028 0.443262411347518
72.2208108976483 0.49645390070922
72.2309227054939 0.514184397163121
72.2410345133394 0.608747044917258
72.2511463211849 0.472813238770686
72.2612581290305 0.526004728132388
72.271369936876 0.543735224586288
72.2814817447215 0.567375886524823
72.2915935525671 0.490543735224586
72.3017053604126 0.49645390070922
72.3118171682581 0.585106382978724
72.3219289761037 0.561465721040189
72.3320407839492 0.644208037825059
72.3421525917947 0.478723404255319
72.3522643996403 0.484633569739953
72.3623762074858 0.573286052009456
72.3724880153313 0.638297872340426
72.3825998231769 0.57919621749409
72.3927116310224 0.526004728132388
72.4028234388679 0.443262411347518
72.4129352467135 0.573286052009456
72.423047054559 0.561465721040189
72.4331588624045 0.508274231678487
72.4432706702501 0.484633569739953
72.4533824780956 0.591016548463357
72.4634942859411 0.455082742316785
72.4736060937867 0.543735224586288
72.4837179016322 0.549645390070922
72.4938297094777 0.591016548463357
72.5039415173233 0.508274231678487
72.5140533251688 0.608747044917258
72.5241651330143 0.472813238770686
72.5342769408599 0.585106382978724
72.5443887487054 0.537825059101655
72.5545005565509 0.490543735224586
72.5646123643965 0.520094562647754
72.574724172242 0.49645390070922
72.5848359800875 0.437352245862884
72.5949477879331 0.596926713947991
72.6050595957786 0.567375886524823
72.6151714036241 0.531914893617021
72.6252832114697 0.531914893617021
72.6353950193152 0.561465721040189
72.6455068271607 0.49645390070922
72.6556186350062 0.526004728132388
72.6657304428518 0.561465721040189
72.6758422506973 0.543735224586288
72.6859540585428 0.537825059101655
72.6960658663884 0.460992907801419
72.7061776742339 0.561465721040189
72.7162894820794 0.508274231678487
72.726401289925 0.531914893617021
72.7365130977705 0.526004728132388
72.746624905616 0.549645390070922
72.7567367134616 0.561465721040189
72.7668485213071 0.526004728132388
72.7769603291526 0.596926713947991
72.7870721369982 0.478723404255319
72.7971839448437 0.543735224586288
72.8072957526892 0.626477541371159
72.8174075605348 0.490543735224586
72.8275193683803 0.543735224586288
72.8376311762258 0.567375886524823
72.8477429840714 0.490543735224586
72.8578547919169 0.608747044917258
72.8679665997624 0.443262411347518
72.878078407608 0.567375886524823
72.8881902154535 0.567375886524823
72.898302023299 0.484633569739953
72.9084138311446 0.449172576832151
72.9185256389901 0.502364066193853
72.9286374468356 0.49645390070922
72.9387492546812 0.608747044917258
72.9488610625267 0.537825059101655
72.9589728703722 0.455082742316785
72.9690846782178 0.644208037825059
72.9791964860633 0.567375886524823
72.9893082939088 0.57919621749409
72.9994201017544 0.555555555555556
73.0095319095999 0.484633569739953
73.0196437174454 0.555555555555556
73.029755525291 0.484633569739953
73.0398673331365 0.478723404255319
73.049979140982 0.567375886524823
73.0600909488276 0.514184397163121
73.0702027566731 0.549645390070922
73.0803145645186 0.531914893617021
73.0904263723642 0.531914893617021
73.1005381802097 0.520094562647754
73.1106499880552 0.520094562647754
73.1207617959008 0.567375886524823
73.1308736037463 0.543735224586288
73.1409854115918 0.561465721040189
73.1510972194374 0.472813238770686
73.1612090272829 0.502364066193853
73.1713208351284 0.484633569739953
73.181432642974 0.632387706855792
73.1915444508195 0.561465721040189
73.201656258665 0.514184397163121
73.2117680665106 0.632387706855792
73.2218798743561 0.520094562647754
73.2319916822016 0.531914893617021
73.2421034900472 0.526004728132388
73.2522152978927 0.508274231678487
73.2623271057382 0.419621749408983
73.2724389135838 0.602836879432624
73.2825507214293 0.632387706855792
73.2926625292748 0.472813238770686
73.3027743371204 0.596926713947991
73.3128861449659 0.726950354609929
73.3229979528114 0.460992907801419
73.333109760657 0.472813238770686
73.3432215685025 0.508274231678487
73.353333376348 0.443262411347518
73.3634451841936 0.508274231678487
73.3735569920391 0.508274231678487
73.3836687998846 0.502364066193853
73.3937806077302 0.555555555555556
73.4038924155757 0.526004728132388
73.4140042234212 0.567375886524823
73.4241160312667 0.596926713947991
73.4342278391123 0.549645390070922
73.4443396469578 0.555555555555556
73.4544514548033 0.614657210401891
73.4645632626489 0.573286052009456
73.4746750704944 0.602836879432624
73.4847868783399 0.555555555555556
73.4948986861855 0.543735224586288
73.505010494031 0.526004728132388
73.5151223018765 0.679669030732861
73.5252341097221 0.614657210401891
73.5353459175676 0.567375886524823
73.5454577254131 0.555555555555556
73.5555695332587 0.460992907801419
73.5656813411042 0.549645390070922
73.5757931489497 0.520094562647754
73.5859049567953 0.602836879432624
73.5960167646408 0.537825059101655
73.6061285724863 0.602836879432624
73.6162403803319 0.543735224586288
73.6263521881774 0.57919621749409
73.6364639960229 0.526004728132388
73.6465758038685 0.537825059101655
73.656687611714 0.531914893617021
73.6667994195595 0.555555555555556
73.6769112274051 0.484633569739953
73.6870230352506 0.626477541371159
73.6971348430961 0.596926713947991
73.7072466509417 0.650118203309693
73.7173584587872 0.620567375886525
73.7274702666327 0.531914893617021
73.7375820744783 0.591016548463357
73.7476938823238 0.626477541371159
73.7578056901693 0.531914893617021
73.7679174980149 0.567375886524823
73.7780293058604 0.596926713947991
73.7881411137059 0.549645390070922
73.7982529215515 0.650118203309693
73.808364729397 0.567375886524823
73.8184765372425 0.472813238770686
73.8285883450881 0.526004728132388
73.8387001529336 0.679669030732861
73.8488119607791 0.567375886524823
73.8589237686247 0.502364066193853
73.8690355764702 0.567375886524823
73.8791473843157 0.561465721040189
73.8892591921613 0.555555555555556
73.8993710000068 0.573286052009456
73.9094828078523 0.490543735224586
73.9195946156979 0.591016548463357
73.9297064235434 0.591016548463357
73.9398182313889 0.602836879432624
73.9499300392345 0.537825059101655
73.96004184708 0.49645390070922
73.9701536549255 0.585106382978724
73.9802654627711 0.555555555555556
73.9903772706166 0.484633569739953
74.0004890784621 0.591016548463357
74.0106008863077 0.531914893617021
74.0207126941532 0.614657210401891
74.0308245019987 0.667848699763593
74.0409363098443 0.526004728132388
74.0510481176898 0.567375886524823
74.0611599255353 0.638297872340426
74.0712717333809 0.626477541371159
74.0813835412264 0.644208037825059
74.0914953490719 0.656028368794326
74.1016071569175 0.697399527186761
74.111718964763 0.673758865248227
74.1218307726085 0.644208037825059
74.1319425804541 0.620567375886525
74.1420543882996 0.656028368794326
74.1521661961451 0.596926713947991
74.1622780039907 0.514184397163121
74.1723898118362 0.614657210401891
74.1825016196817 0.591016548463357
74.1926134275272 0.531914893617021
74.2027252353728 0.561465721040189
74.2128370432183 0.591016548463357
74.2229488510638 0.567375886524823
74.2330606589094 0.626477541371159
74.2431724667549 0.49645390070922
74.2532842746004 0.561465721040189
74.263396082446 0.656028368794326
74.2735078902915 0.608747044917258
74.283619698137 0.626477541371159
74.2937315059826 0.650118203309693
74.3038433138281 0.608747044917258
74.3139551216736 0.667848699763593
74.3240669295192 0.667848699763593
74.3341787373647 0.596926713947991
74.3442905452102 0.703309692671395
74.3544023530558 0.543735224586288
74.3645141609013 0.614657210401891
74.3746259687468 0.573286052009456
74.3847377765924 0.549645390070922
74.3948495844379 0.591016548463357
74.4049613922834 0.685579196217494
74.415073200129 0.591016548463357
74.4251850079745 0.632387706855792
74.43529681582 0.632387706855792
74.4454086236656 0.756501182033097
74.4555204315111 0.514184397163121
74.4656322393566 0.520094562647754
74.4757440472022 0.567375886524823
74.4858558550477 0.726950354609929
74.4959676628932 0.561465721040189
74.5060794707388 0.703309692671395
74.5161912785843 0.644208037825059
74.5263030864298 0.57919621749409
74.5364148942754 0.57919621749409
74.5465267021209 0.715130023640662
74.5566385099664 0.585106382978724
74.566750317812 0.490543735224586
74.5768621256575 0.472813238770686
74.586973933503 0.602836879432624
74.5970857413486 0.596926713947991
74.6071975491941 0.502364066193853
74.6173093570396 0.602836879432624
74.6274211648852 0.573286052009456
74.6375329727307 0.549645390070922
74.6476447805762 0.520094562647754
74.6577565884218 0.526004728132388
74.6678683962673 0.679669030732861
74.6779802041128 0.632387706855792
74.6880920119584 0.531914893617021
74.6982038198039 0.573286052009456
74.7083156276494 0.526004728132388
74.718427435495 0.614657210401891
74.7285392433405 0.620567375886525
74.738651051186 0.638297872340426
74.7487628590316 0.644208037825059
74.7588746668771 0.567375886524823
74.7689864747226 0.490543735224586
74.7790982825682 0.549645390070922
74.7892100904137 0.531914893617021
74.7993218982592 0.573286052009456
74.8094337061048 0.567375886524823
74.8195455139503 0.573286052009456
74.8296573217958 0.508274231678487
74.8397691296414 0.591016548463357
74.8498809374869 0.555555555555556
74.8599927453324 0.673758865248227
74.870104553178 0.561465721040189
74.8802163610235 0.632387706855792
74.890328168869 0.638297872340426
74.9004399767146 0.585106382978724
74.9105517845601 0.478723404255319
74.9206635924056 0.679669030732861
74.9307754002512 0.57919621749409
74.9408872080967 0.650118203309693
74.9509990159422 0.602836879432624
74.9611108237877 0.614657210401891
74.9712226316333 0.555555555555556
74.9813344394788 0.602836879432624
74.9914462473243 0.561465721040189
75.0015580551699 0.656028368794326
75.0116698630154 0.567375886524823
75.0217816708609 0.508274231678487
75.0318934787065 0.531914893617021
75.042005286552 0.596926713947991
75.0521170943975 0.591016548463357
75.0622289022431 0.591016548463357
75.0723407100886 0.602836879432624
75.0824525179341 0.549645390070922
75.0925643257797 0.591016548463357
75.1026761336252 0.626477541371159
75.1127879414707 0.638297872340426
75.1228997493163 0.549645390070922
75.1330115571618 0.620567375886525
75.1431233650073 0.437352245862884
75.1532351728529 0.573286052009456
75.1633469806984 0.567375886524823
75.1734587885439 0.508274231678487
75.1835705963895 0.549645390070922
75.193682404235 0.626477541371159
75.2037942120805 0.549645390070922
75.2139060199261 0.561465721040189
75.2240178277716 0.691489361702128
75.2341296356171 0.531914893617021
75.2442414434627 0.41371158392435
75.2543532513082 0.531914893617021
75.2644650591537 0.478723404255319
75.2745768669993 0.549645390070922
75.2846886748448 0.502364066193853
75.2948004826903 0.555555555555556
75.3049122905359 0.691489361702128
75.3150240983814 0.537825059101655
75.3251359062269 0.57919621749409
75.3352477140725 0.561465721040189
75.345359521918 0.620567375886525
75.3554713297635 0.585106382978724
75.3655831376091 0.543735224586288
75.3756949454546 0.537825059101655
75.3858067533001 0.478723404255319
75.3959185611457 0.508274231678487
75.4060303689912 0.460992907801419
75.4161421768367 0.614657210401891
75.4262539846823 0.466903073286052
75.4363657925278 0.561465721040189
75.4464776003733 0.561465721040189
75.4565894082189 0.514184397163121
75.4667012160644 0.526004728132388
75.4768130239099 0.549645390070922
75.4869248317555 0.549645390070922
75.497036639601 0.620567375886525
75.5071484474465 0.591016548463357
75.5172602552921 0.585106382978724
75.5273720631376 0.561465721040189
75.5374838709831 0.531914893617021
75.5475956788287 0.573286052009456
75.5577074866742 0.543735224586288
75.5678192945197 0.520094562647754
75.5779311023653 0.537825059101655
75.5880429102108 0.449172576832151
75.5981547180563 0.591016548463357
75.6082665259019 0.520094562647754
75.6183783337474 0.508274231678487
75.6284901415929 0.455082742316785
75.6386019494385 0.567375886524823
75.648713757284 0.502364066193853
75.6588255651295 0.49645390070922
75.6689373729751 0.508274231678487
75.6790491808206 0.466903073286052
75.6891609886661 0.531914893617021
75.6992727965117 0.484633569739953
75.7093846043572 0.555555555555556
75.7194964122027 0.596926713947991
75.7296082200482 0.543735224586288
75.7397200278938 0.455082742316785
75.7498318357393 0.478723404255319
75.7599436435848 0.531914893617021
75.7700554514304 0.561465721040189
75.7801672592759 0.549645390070922
75.7902790671214 0.537825059101655
75.800390874967 0.366430260047281
75.8105026828125 0.395981087470449
75.820614490658 0.549645390070922
75.8307262985036 0.460992907801419
75.8408381063491 0.460992907801419
75.8509499141946 0.472813238770686
75.8610617220402 0.49645390070922
75.8711735298857 0.537825059101655
75.8812853377312 0.425531914893617
75.8913971455768 0.526004728132388
75.9015089534223 0.514184397163121
75.9116207612678 0.484633569739953
75.9217325691134 0.508274231678487
75.9318443769589 0.537825059101655
75.9419561848044 0.490543735224586
75.95206799265 0.466903073286052
75.9621798004955 0.531914893617021
75.972291608341 0.455082742316785
75.9824034161866 0.437352245862884
75.9925152240321 0.508274231678487
76.0026270318776 0.472813238770686
76.0127388397232 0.460992907801419
76.0228506475687 0.585106382978724
76.0329624554142 0.478723404255319
76.0430742632598 0.490543735224586
76.0531860711053 0.484633569739953
76.0632978789508 0.460992907801419
76.0734096867964 0.437352245862884
76.0835214946419 0.526004728132388
76.0936333024874 0.49645390070922
76.103745110333 0.419621749408983
76.1138569181785 0.508274231678487
76.123968726024 0.520094562647754
76.1340805338696 0.49645390070922
76.1441923417151 0.437352245862884
76.1543041495606 0.460992907801419
76.1644159574062 0.531914893617021
76.1745277652517 0.490543735224586
76.1846395730972 0.508274231678487
76.1947513809428 0.360520094562648
76.2048631887883 0.41371158392435
76.2149749966338 0.378250591016549
76.2250868044794 0.407801418439716
76.2351986123249 0.449172576832151
76.2453104201704 0.472813238770686
76.255422228016 0.425531914893617
76.2655340358615 0.342789598108747
76.275645843707 0.478723404255319
76.2857576515526 0.455082742316785
76.2958694593981 0.460992907801419
76.3059812672436 0.490543735224586
76.3160930750892 0.484633569739953
76.3262048829347 0.490543735224586
76.3363166907802 0.490543735224586
76.3464284986258 0.472813238770686
76.3565403064713 0.437352245862884
76.3666521143168 0.490543735224586
76.3767639221624 0.395981087470449
76.3868757300079 0.502364066193853
76.3969875378534 0.526004728132388
76.407099345699 0.431442080378251
76.4172111535445 0.478723404255319
76.42732296139 0.378250591016549
76.4374347692356 0.41371158392435
76.4475465770811 0.508274231678487
76.4576583849266 0.537825059101655
76.4677701927722 0.466903073286052
76.4778820006177 0.460992907801419
76.4879938084632 0.472813238770686
76.4981056163087 0.425531914893617
76.5082174241543 0.508274231678487
76.5183292319998 0.49645390070922
76.5284410398453 0.449172576832151
76.5385528476909 0.484633569739953
76.5486646555364 0.372340425531915
76.5587764633819 0.514184397163121
76.5688882712275 0.449172576832151
76.579000079073 0.449172576832151
76.5891118869185 0.443262411347518
76.5992236947641 0.443262411347518
76.6093355026096 0.366430260047281
76.6194473104551 0.508274231678487
76.6295591183007 0.472813238770686
76.6396709261462 0.472813238770686
76.6497827339917 0.49645390070922
76.6598945418373 0.514184397163121
76.6700063496828 0.437352245862884
76.6801181575283 0.443262411347518
76.6902299653739 0.531914893617021
76.7003417732194 0.395981087470449
76.7104535810649 0.508274231678487
76.7205653889105 0.508274231678487
76.730677196756 0.384160756501182
76.7407890046015 0.508274231678487
76.7509008124471 0.514184397163121
76.7610126202926 0.437352245862884
76.7711244281381 0.466903073286052
76.7812362359837 0.390070921985816
76.7913480438292 0.419621749408983
76.8014598516747 0.419621749408983
76.8115716595203 0.460992907801419
76.8216834673658 0.478723404255319
76.8317952752113 0.484633569739953
76.8419070830569 0.41371158392435
76.8520188909024 0.484633569739953
76.8621306987479 0.419621749408983
76.8722425065935 0.437352245862884
76.882354314439 0.490543735224586
76.8924661222845 0.549645390070922
76.9025779301301 0.443262411347518
76.9126897379756 0.431442080378251
76.9228015458211 0.531914893617021
76.9329133536667 0.537825059101655
76.9430251615122 0.348699763593381
76.9531369693577 0.602836879432624
76.9632487772033 0.502364066193853
76.9733605850488 0.502364066193853
76.9834723928943 0.348699763593381
76.9935842007399 0.449172576832151
77.0036960085854 0.502364066193853
77.0138078164309 0.455082742316785
77.0239196242765 0.378250591016549
77.034031432122 0.490543735224586
77.0441432399675 0.490543735224586
77.0542550478131 0.407801418439716
77.0643668556586 0.407801418439716
77.0744786635041 0.472813238770686
77.0845904713497 0.325059101654846
77.0947022791952 0.437352245862884
77.1048140870407 0.401891252955083
77.1149258948863 0.378250591016549
77.1250377027318 0.490543735224586
77.1351495105773 0.437352245862884
77.1452613184229 0.437352245862884
77.1553731262684 0.466903073286052
77.1654849341139 0.502364066193853
77.1755967419595 0.460992907801419
77.185708549805 0.514184397163121
77.1958203576505 0.443262411347518
77.2059321654961 0.455082742316785
77.2160439733416 0.431442080378251
77.2261557811871 0.531914893617021
77.2362675890327 0.514184397163121
77.2463793968782 0.419621749408983
77.2564912047237 0.390070921985816
77.2666030125692 0.378250591016549
77.2767148204148 0.372340425531915
77.2868266282603 0.360520094562648
77.2969384361058 0.390070921985816
77.3070502439514 0.466903073286052
77.3171620517969 0.419621749408983
77.3272738596424 0.449172576832151
77.337385667488 0.41371158392435
77.3474974753335 0.33096926713948
77.357609283179 0.348699763593381
77.3677210910246 0.449172576832151
77.3778328988701 0.478723404255319
77.3879447067156 0.443262411347518
77.3980565145612 0.472813238770686
77.4081683224067 0.419621749408983
77.4182801302522 0.466903073286052
77.4283919380978 0.484633569739953
77.4385037459433 0.390070921985816
77.4486155537888 0.41371158392435
77.4587273616344 0.384160756501182
77.4688391694799 0.49645390070922
77.4789509773254 0.395981087470449
77.489062785171 0.336879432624114
77.4991745930165 0.41371158392435
77.509286400862 0.425531914893617
77.5193982087076 0.401891252955083
77.5295100165531 0.407801418439716
77.5396218243986 0.537825059101655
77.5497336322442 0.395981087470449
77.5598454400897 0.502364066193853
77.5699572479352 0.431442080378251
77.5800690557808 0.437352245862884
77.5901808636263 0.437352245862884
77.6002926714718 0.455082742316785
77.6104044793174 0.407801418439716
77.6205162871629 0.348699763593381
77.6306280950084 0.478723404255319
77.640739902854 0.437352245862884
77.6508517106995 0.543735224586288
77.660963518545 0.401891252955083
77.6710753263906 0.449172576832151
77.6811871342361 0.472813238770686
77.6912989420816 0.443262411347518
77.7014107499272 0.460992907801419
77.7115225577727 0.390070921985816
77.7216343656182 0.449172576832151
77.7317461734638 0.455082742316785
77.7418579813093 0.455082742316785
77.7519697891548 0.460992907801419
77.7620815970004 0.472813238770686
77.7721934048459 0.455082742316785
77.7823052126914 0.419621749408983
77.792417020537 0.449172576832151
77.8025288283825 0.443262411347518
77.812640636228 0.390070921985816
77.8227524440736 0.378250591016549
77.8328642519191 0.378250591016549
77.8429760597646 0.401891252955083
77.8530878676102 0.514184397163121
77.8631996754557 0.419621749408983
77.8733114833012 0.490543735224586
77.8834232911468 0.419621749408983
77.8935350989923 0.437352245862884
77.9036469068378 0.443262411347518
77.9137587146834 0.366430260047281
77.9238705225289 0.372340425531915
77.9339823303744 0.419621749408983
77.94409413822 0.437352245862884
77.9542059460655 0.49645390070922
77.964317753911 0.401891252955083
77.9744295617566 0.514184397163121
77.9845413696021 0.437352245862884
77.9946531774476 0.460992907801419
78.0047649852932 0.41371158392435
78.0148767931387 0.360520094562648
78.0249886009842 0.437352245862884
78.0351004088297 0.431442080378251
78.0452122166753 0.401891252955083
78.0553240245208 0.484633569739953
78.0654358323663 0.455082742316785
78.0755476402119 0.372340425531915
78.0856594480574 0.449172576832151
78.0957712559029 0.407801418439716
78.1058830637485 0.449172576832151
78.115994871594 0.478723404255319
78.1261066794395 0.425531914893617
78.1362184872851 0.390070921985816
78.1463302951306 0.531914893617021
78.1564421029761 0.460992907801419
78.1665539108217 0.41371158392435
78.1766657186672 0.395981087470449
78.1867775265127 0.537825059101655
78.1968893343583 0.372340425531915
78.2070011422038 0.395981087470449
78.2171129500493 0.478723404255319
78.2272247578949 0.466903073286052
78.2373365657404 0.407801418439716
78.2474483735859 0.531914893617021
78.2575601814315 0.508274231678487
78.267671989277 0.460992907801419
78.2777837971225 0.425531914893617
78.2878956049681 0.431442080378251
78.2980074128136 0.425531914893617
78.3081192206591 0.390070921985816
78.3182310285047 0.384160756501182
78.3283428363502 0.419621749408983
78.3384546441957 0.478723404255319
78.3485664520413 0.49645390070922
78.3586782598868 0.407801418439716
78.3687900677323 0.514184397163121
78.3789018755779 0.490543735224586
78.3890136834234 0.401891252955083
78.3991254912689 0.514184397163121
78.4092372991145 0.472813238770686
78.41934910696 0.425531914893617
78.4294609148055 0.407801418439716
78.4395727226511 0.472813238770686
78.4496845304966 0.460992907801419
78.4597963383421 0.466903073286052
78.4699081461877 0.472813238770686
78.4800199540332 0.478723404255319
78.4901317618787 0.449172576832151
78.5002435697243 0.366430260047281
78.5103553775698 0.466903073286052
78.5204671854153 0.449172576832151
78.5305789932609 0.425531914893617
78.5406908011064 0.478723404255319
78.5508026089519 0.466903073286052
78.5609144167975 0.484633569739953
78.571026224643 0.425531914893617
78.5811380324885 0.419621749408983
78.5912498403341 0.366430260047281
78.6013616481796 0.490543735224586
78.6114734560251 0.460992907801419
78.6215852638707 0.384160756501182
78.6316970717162 0.390070921985816
78.6418088795617 0.41371158392435
78.6519206874073 0.360520094562648
78.6620324952528 0.395981087470449
78.6721443030983 0.407801418439716
78.6822561109439 0.490543735224586
78.6923679187894 0.526004728132388
78.7024797266349 0.41371158392435
78.7125915344805 0.466903073286052
78.722703342326 0.502364066193853
78.7328151501715 0.455082742316785
78.7429269580171 0.460992907801419
78.7530387658626 0.419621749408983
78.7631505737081 0.407801418439716
78.7732623815537 0.460992907801419
78.7833741893992 0.466903073286052
78.7934859972447 0.437352245862884
78.8035978050902 0.561465721040189
78.8137096129358 0.478723404255319
78.8238214207813 0.472813238770686
78.8339332286268 0.407801418439716
78.8440450364724 0.502364066193853
78.8541568443179 0.490543735224586
78.8642686521634 0.466903073286052
78.874380460009 0.443262411347518
78.8844922678545 0.466903073286052
78.8946040757 0.390070921985816
78.9047158835456 0.514184397163121
78.9148276913911 0.41371158392435
78.9249394992366 0.466903073286052
78.9350513070822 0.336879432624114
78.9451631149277 0.41371158392435
78.9552749227732 0.460992907801419
78.9653867306188 0.472813238770686
78.9754985384643 0.543735224586288
78.9856103463098 0.49645390070922
78.9957221541554 0.41371158392435
79.0058339620009 0.348699763593381
79.0159457698464 0.395981087470449
79.026057577692 0.401891252955083
79.0361693855375 0.401891252955083
79.046281193383 0.431442080378251
79.0563930012286 0.384160756501182
79.0665048090741 0.514184397163121
79.0766166169196 0.41371158392435
79.0867284247652 0.41371158392435
79.0968402326107 0.502364066193853
79.1069520404562 0.431442080378251
79.1170638483018 0.484633569739953
79.1271756561473 0.549645390070922
79.1372874639928 0.460992907801419
79.1473992718384 0.502364066193853
79.1575110796839 0.460992907801419
79.1676228875294 0.401891252955083
79.177734695375 0.390070921985816
79.1878465032205 0.449172576832151
79.197958311066 0.614657210401891
79.2080701189116 0.531914893617021
79.2181819267571 0.348699763593381
79.2282937346026 0.443262411347518
79.2384055424482 0.449172576832151
79.2485173502937 0.484633569739953
79.2586291581392 0.472813238770686
79.2687409659848 0.449172576832151
79.2788527738303 0.449172576832151
79.2889645816758 0.443262411347518
79.2990763895214 0.520094562647754
79.3091881973669 0.466903073286052
79.3193000052124 0.372340425531915
79.329411813058 0.425531914893617
79.3395236209035 0.455082742316785
79.349635428749 0.319148936170213
79.3597472365946 0.455082742316785
79.3698590444401 0.354609929078014
79.3799708522856 0.49645390070922
79.3900826601312 0.390070921985816
79.4001944679767 0.407801418439716
79.4103062758222 0.466903073286052
79.4204180836678 0.585106382978724
79.4305298915133 0.508274231678487
79.4406416993588 0.455082742316785
79.4507535072044 0.443262411347518
79.4608653150499 0.378250591016549
79.4709771228954 0.449172576832151
79.481088930741 0.567375886524823
79.4912007385865 0.437352245862884
79.501312546432 0.526004728132388
79.5114243542776 0.437352245862884
79.5215361621231 0.449172576832151
79.5316479699686 0.401891252955083
79.5417597778142 0.531914893617021
79.5518715856597 0.366430260047281
79.5619833935052 0.449172576832151
79.5720952013507 0.472813238770686
79.5822070091963 0.460992907801419
79.5923188170418 0.561465721040189
79.6024306248873 0.455082742316785
79.6125424327329 0.443262411347518
79.6226542405784 0.478723404255319
79.6327660484239 0.466903073286052
79.6428778562695 0.478723404255319
79.652989664115 0.478723404255319
79.6631014719605 0.390070921985816
79.6732132798061 0.390070921985816
79.6833250876516 0.372340425531915
79.6934368954971 0.425531914893617
79.7035487033427 0.632387706855792
79.7136605111882 0.395981087470449
79.7237723190337 0.431442080378251
79.7338841268793 0.425531914893617
79.7439959347248 0.390070921985816
79.7541077425703 0.478723404255319
79.7642195504159 0.508274231678487
79.7743313582614 0.354609929078014
79.7844431661069 0.443262411347518
79.7945549739525 0.460992907801419
79.804666781798 0.407801418439716
79.8147785896435 0.437352245862884
79.8248903974891 0.502364066193853
79.8350022053346 0.455082742316785
79.8451140131801 0.449172576832151
79.8552258210257 0.49645390070922
79.8653376288712 0.395981087470449
79.8754494367167 0.395981087470449
79.8855612445623 0.502364066193853
79.8956730524078 0.443262411347518
79.9057848602533 0.401891252955083
79.9158966680989 0.478723404255319
79.9260084759444 0.342789598108747
79.9361202837899 0.419621749408983
79.9462320916355 0.466903073286052
79.956343899481 0.431442080378251
79.9664557073265 0.325059101654846
79.9765675151721 0.537825059101655
79.9866793230176 0.41371158392435
79.9967911308631 0.449172576832151
80.0069029387087 0.41371158392435
80.0170147465542 0.443262411347518
80.0271265543997 0.41371158392435
80.0372383622453 0.425531914893617
80.0473501700908 0.472813238770686
80.0574619779363 0.395981087470449
80.0675737857819 0.490543735224586
80.0776855936274 0.484633569739953
80.0877974014729 0.478723404255319
80.0979092093185 0.443262411347518
80.108021017164 0.49645390070922
80.1181328250095 0.395981087470449
80.1282446328551 0.472813238770686
80.1383564407006 0.443262411347518
80.1484682485461 0.466903073286052
80.1585800563917 0.472813238770686
80.1686918642372 0.378250591016549
80.1788036720827 0.395981087470449
80.1889154799283 0.537825059101655
80.1990272877738 0.478723404255319
80.2091390956193 0.366430260047281
80.2192509034649 0.455082742316785
80.2293627113104 0.401891252955083
80.2394745191559 0.419621749408983
80.2495863270015 0.478723404255319
80.259698134847 0.395981087470449
80.2698099426925 0.472813238770686
80.2799217505381 0.466903073286052
80.2900335583836 0.460992907801419
80.3001453662291 0.419621749408983
80.3102571740747 0.384160756501182
80.3203689819202 0.325059101654846
80.3304807897657 0.336879432624114
80.3405925976112 0.372340425531915
80.3507044054568 0.378250591016549
80.3608162133023 0.490543735224586
80.3709280211478 0.443262411347518
80.3810398289934 0.407801418439716
80.3911516368389 0.390070921985816
80.4012634446844 0.478723404255319
80.41137525253 0.384160756501182
80.4214870603755 0.336879432624114
80.431598868221 0.378250591016549
80.4417106760666 0.514184397163121
80.4518224839121 0.407801418439716
80.4619342917576 0.41371158392435
80.4720460996032 0.455082742316785
80.4821579074487 0.478723404255319
80.4922697152942 0.437352245862884
80.5023815231398 0.437352245862884
80.5124933309853 0.395981087470449
80.5226051388308 0.348699763593381
80.5327169466764 0.431442080378251
80.5428287545219 0.478723404255319
80.5529405623674 0.395981087470449
80.563052370213 0.384160756501182
80.5731641780585 0.431442080378251
80.583275985904 0.455082742316785
80.5933877937496 0.460992907801419
80.6034996015951 0.390070921985816
80.6136114094406 0.354609929078014
80.6237232172862 0.466903073286052
80.6338350251317 0.508274231678487
80.6439468329772 0.455082742316785
80.6540586408228 0.33096926713948
80.6641704486683 0.360520094562648
80.6742822565138 0.372340425531915
80.6843940643594 0.372340425531915
80.6945058722049 0.348699763593381
80.7046176800504 0.419621749408983
80.714729487896 0.425531914893617
80.7248412957415 0.354609929078014
80.734953103587 0.443262411347518
80.7450649114326 0.33096926713948
80.7551767192781 0.384160756501182
80.7652885271236 0.502364066193853
80.7754003349692 0.342789598108747
80.7855121428147 0.425531914893617
80.7956239506602 0.449172576832151
80.8057357585058 0.437352245862884
80.8158475663513 0.360520094562648
80.8259593741968 0.390070921985816
80.8360711820424 0.466903073286052
80.8461829898879 0.437352245862884
80.8562947977334 0.460992907801419
80.866406605579 0.384160756501182
80.8765184134245 0.449172576832151
80.88663022127 0.295508274231679
80.8967420291156 0.372340425531915
80.9068538369611 0.437352245862884
80.9169656448066 0.301418439716312
80.9270774526522 0.425531914893617
80.9371892604977 0.378250591016549
80.9473010683432 0.41371158392435
80.9574128761888 0.449172576832151
80.9675246840343 0.460992907801419
80.9776364918798 0.443262411347518
80.9877482997254 0.455082742316785
80.9978601075709 0.390070921985816
81.0079719154164 0.384160756501182
81.018083723262 0.443262411347518
81.0281955311075 0.390070921985816
81.038307338953 0.348699763593381
81.0484191467986 0.325059101654846
81.0585309546441 0.425531914893617
81.0686427624896 0.472813238770686
81.0787545703352 0.366430260047281
81.0888663781807 0.348699763593381
81.0989781860262 0.390070921985816
81.1090899938717 0.354609929078014
81.1192018017173 0.384160756501182
81.1293136095628 0.425531914893617
81.1394254174083 0.384160756501182
81.1495372252539 0.431442080378251
81.1596490330994 0.372340425531915
81.1697608409449 0.354609929078014
81.1798726487905 0.366430260047281
81.189984456636 0.378250591016549
81.2000962644815 0.407801418439716
81.2102080723271 0.401891252955083
81.2203198801726 0.419621749408983
81.2304316880181 0.431442080378251
81.2405434958637 0.342789598108747
81.2506553037092 0.354609929078014
81.2607671115547 0.443262411347518
81.2708789194003 0.366430260047281
81.2809907272458 0.390070921985816
81.2911025350913 0.449172576832151
81.3012143429369 0.336879432624114
81.3113261507824 0.319148936170213
81.3214379586279 0.319148936170213
81.3315497664735 0.384160756501182
81.341661574319 0.336879432624114
81.3517733821645 0.366430260047281
81.3618851900101 0.401891252955083
81.3719969978556 0.378250591016549
81.3821088057011 0.419621749408983
81.3922206135467 0.360520094562648
81.4023324213922 0.437352245862884
81.4124442292377 0.378250591016549
81.4225560370833 0.419621749408983
81.4326678449288 0.419621749408983
81.4427796527743 0.395981087470449
81.4528914606199 0.549645390070922
81.4630032684654 0.401891252955083
81.4731150763109 0.466903073286052
81.4832268841565 0.455082742316785
81.493338692002 0.455082742316785
81.5034504998475 0.348699763593381
81.5135623076931 0.401891252955083
81.5236741155386 0.348699763593381
81.5337859233841 0.366430260047281
81.5438977312297 0.401891252955083
81.5540095390752 0.419621749408983
81.5641213469207 0.437352245862884
81.5742331547663 0.41371158392435
81.5843449626118 0.378250591016549
81.5944567704573 0.395981087470449
81.6045685783029 0.378250591016549
81.6146803861484 0.360520094562648
81.6247921939939 0.384160756501182
81.6349040018395 0.378250591016549
81.645015809685 0.342789598108747
81.6551276175305 0.354609929078014
81.6652394253761 0.342789598108747
81.6753512332216 0.378250591016549
81.6854630410671 0.407801418439716
81.6955748489127 0.431442080378251
81.7056866567582 0.395981087470449
81.7157984646037 0.378250591016549
81.7259102724493 0.419621749408983
81.7360220802948 0.390070921985816
81.7461338881403 0.348699763593381
81.7562456959859 0.466903073286052
81.7663575038314 0.372340425531915
81.7764693116769 0.437352245862884
81.7865811195225 0.443262411347518
81.796692927368 0.395981087470449
81.8068047352135 0.354609929078014
81.8169165430591 0.378250591016549
81.8270283509046 0.41371158392435
81.8371401587501 0.395981087470449
81.8472519665957 0.33096926713948
81.8573637744412 0.425531914893617
81.8674755822867 0.360520094562648
81.8775873901322 0.277777777777778
81.8876991979778 0.490543735224586
81.8978110058233 0.366430260047281
81.9079228136688 0.354609929078014
81.9180346215144 0.455082742316785
81.9281464293599 0.443262411347518
81.9382582372054 0.419621749408983
81.948370045051 0.425531914893617
81.9584818528965 0.366430260047281
81.968593660742 0.41371158392435
81.9787054685876 0.449172576832151
81.9888172764331 0.478723404255319
81.9989290842786 0.407801418439716
82.0090408921242 0.425531914893617
82.0191526999697 0.407801418439716
82.0292645078152 0.401891252955083
82.0393763156608 0.419621749408983
82.0494881235063 0.419621749408983
82.0595999313518 0.478723404255319
82.0697117391974 0.401891252955083
82.0798235470429 0.407801418439716
82.0899353548884 0.449172576832151
82.100047162734 0.41371158392435
82.1101589705795 0.348699763593381
82.120270778425 0.378250591016549
82.1303825862706 0.419621749408983
82.1404943941161 0.260047281323877
82.1506062019616 0.395981087470449
82.1607180098072 0.354609929078014
82.1708298176527 0.431442080378251
82.1809416254982 0.425531914893617
82.1910534333438 0.271867612293144
82.2011652411893 0.372340425531915
82.2112770490348 0.384160756501182
82.2213888568804 0.425531914893617
82.2315006647259 0.443262411347518
82.2416124725714 0.342789598108747
82.251724280417 0.283687943262411
82.2618360882625 0.33096926713948
82.271947896108 0.395981087470449
82.2820597039536 0.41371158392435
82.2921715117991 0.313238770685579
82.3022833196446 0.283687943262411
82.3123951274902 0.366430260047281
82.3225069353357 0.366430260047281
82.3326187431812 0.366430260047281
82.3427305510268 0.395981087470449
82.3528423588723 0.431442080378251
82.3629541667178 0.366430260047281
82.3730659745634 0.366430260047281
82.3831777824089 0.336879432624114
82.3932895902544 0.372340425531915
82.4034013981 0.319148936170213
82.4135132059455 0.419621749408983
82.423625013791 0.354609929078014
82.4337368216366 0.336879432624114
82.4438486294821 0.395981087470449
82.4539604373276 0.407801418439716
82.4640722451732 0.348699763593381
82.4741840530187 0.407801418439716
82.4842958608642 0.307328605200946
82.4944076687098 0.401891252955083
82.5045194765553 0.390070921985816
82.5146312844008 0.325059101654846
82.5247430922464 0.378250591016549
82.5348549000919 0.366430260047281
82.5449667079374 0.277777777777778
82.555078515783 0.342789598108747
82.5651903236285 0.307328605200946
82.575302131474 0.289598108747045
82.5854139393196 0.372340425531915
82.5955257471651 0.260047281323877
82.6056375550106 0.277777777777778
82.6157493628562 0.360520094562648
82.6258611707017 0.390070921985816
82.6359729785472 0.360520094562648
82.6460847863927 0.455082742316785
82.6561965942383 0.431442080378251
82.6663084020838 0.277777777777778
82.6764202099293 0.401891252955083
82.6865320177749 0.366430260047281
82.6966438256204 0.472813238770686
82.7067556334659 0.419621749408983
82.7168674413115 0.419621749408983
82.726979249157 0.366430260047281
82.7370910570025 0.41371158392435
82.7472028648481 0.342789598108747
82.7573146726936 0.342789598108747
82.7674264805391 0.360520094562648
82.7775382883847 0.360520094562648
82.7876500962302 0.425531914893617
82.7977619040757 0.33096926713948
82.8078737119213 0.336879432624114
82.8179855197668 0.401891252955083
82.8280973276123 0.372340425531915
82.8382091354579 0.419621749408983
82.8483209433034 0.41371158392435
82.8584327511489 0.295508274231679
82.8685445589945 0.33096926713948
82.87865636684 0.33096926713948
82.8887681746855 0.384160756501182
82.8988799825311 0.325059101654846
82.9089917903766 0.360520094562648
82.9191035982221 0.366430260047281
82.9292154060677 0.384160756501182
82.9393272139132 0.360520094562648
82.9494390217587 0.283687943262411
82.9595508296043 0.384160756501182
82.9696626374498 0.372340425531915
82.9797744452953 0.401891252955083
82.9898862531409 0.384160756501182
82.9999980609864 0.378250591016549
83.0101098688319 0.384160756501182
83.0202216766775 0.425531914893617
83.030333484523 0.325059101654846
83.0404452923685 0.431442080378251
83.0505571002141 0.360520094562648
83.0606689080596 0.437352245862884
83.0707807159051 0.395981087470449
83.0808925237507 0.348699763593381
83.0910043315962 0.366430260047281
83.1011161394417 0.384160756501182
83.1112279472873 0.443262411347518
83.1213397551328 0.336879432624114
83.1314515629783 0.354609929078014
83.1415633708239 0.354609929078014
83.1516751786694 0.419621749408983
83.1617869865149 0.319148936170213
83.1718987943605 0.313238770685579
83.182010602206 0.390070921985816
83.1921224100515 0.354609929078014
83.2022342178971 0.33096926713948
83.2123460257426 0.390070921985816
83.2224578335881 0.33096926713948
83.2325696414337 0.319148936170213
83.2426814492792 0.384160756501182
83.2527932571247 0.354609929078014
83.2629050649703 0.449172576832151
83.2730168728158 0.395981087470449
83.2831286806613 0.384160756501182
83.2932404885069 0.395981087470449
83.3033522963524 0.372340425531915
83.3134641041979 0.390070921985816
83.3235759120435 0.407801418439716
83.333687719889 0.472813238770686
83.3437995277345 0.401891252955083
83.3539113355801 0.366430260047281
83.3640231434256 0.407801418439716
83.3741349512711 0.295508274231679
83.3842467591167 0.354609929078014
83.3943585669622 0.295508274231679
83.4044703748077 0.271867612293144
83.4145821826532 0.277777777777778
83.4246939904988 0.319148936170213
83.4348057983443 0.466903073286052
83.4449176061898 0.425531914893617
83.4550294140354 0.390070921985816
83.4651412218809 0.289598108747045
83.4752530297264 0.378250591016549
83.485364837572 0.33096926713948
83.4954766454175 0.478723404255319
83.505588453263 0.313238770685579
83.5157002611086 0.354609929078014
83.5258120689541 0.366430260047281
83.5359238767996 0.407801418439716
83.5460356846452 0.360520094562648
83.5561474924907 0.378250591016549
83.5662593003362 0.378250591016549
83.5763711081818 0.354609929078014
83.5864829160273 0.33096926713948
83.5965947238728 0.33096926713948
83.6067065317184 0.301418439716312
83.6168183395639 0.342789598108747
83.6269301474094 0.390070921985816
83.637041955255 0.401891252955083
83.6471537631005 0.360520094562648
83.657265570946 0.395981087470449
83.6673773787916 0.336879432624114
83.6774891866371 0.342789598108747
83.6876009944826 0.395981087470449
83.6977128023282 0.425531914893617
83.7078246101737 0.265957446808511
83.7179364180192 0.360520094562648
83.7280482258648 0.319148936170213
83.7381600337103 0.407801418439716
83.7482718415558 0.348699763593381
83.7583836494014 0.313238770685579
83.7684954572469 0.319148936170213
83.7786072650924 0.289598108747045
83.788719072938 0.295508274231679
83.7988308807835 0.224586288416076
83.808942688629 0.313238770685579
83.8190544964746 0.354609929078014
83.8291663043201 0.319148936170213
83.8392781121656 0.378250591016549
83.8493899200112 0.289598108747045
83.8595017278567 0.325059101654846
83.8696135357022 0.378250591016549
83.8797253435478 0.437352245862884
83.8898371513933 0.336879432624114
83.8999489592388 0.360520094562648
83.9100607670844 0.366430260047281
83.9201725749299 0.390070921985816
83.9302843827754 0.354609929078014
83.940396190621 0.354609929078014
83.9505079984665 0.301418439716312
83.960619806312 0.33096926713948
83.9707316141576 0.325059101654846
83.9808434220031 0.283687943262411
83.9909552298486 0.372340425531915
84.0010670376942 0.378250591016549
84.0111788455397 0.319148936170213
84.0212906533852 0.366430260047281
84.0314024612308 0.342789598108747
84.0415142690763 0.419621749408983
84.0516260769218 0.336879432624114
84.0617378847674 0.360520094562648
84.0718496926129 0.360520094562648
84.0819615004584 0.360520094562648
84.092073308304 0.407801418439716
84.1021851161495 0.342789598108747
84.112296923995 0.295508274231679
84.1224087318406 0.336879432624114
84.1325205396861 0.313238770685579
84.1426323475316 0.319148936170213
84.1527441553772 0.378250591016549
84.1628559632227 0.384160756501182
84.1729677710682 0.325059101654846
84.1830795789137 0.401891252955083
84.1931913867593 0.307328605200946
84.2033031946048 0.384160756501182
84.2134150024503 0.348699763593381
84.2235268102959 0.301418439716312
84.2336386181414 0.460992907801419
84.2437504259869 0.342789598108747
84.2538622338325 0.401891252955083
84.263974041678 0.319148936170213
84.2740858495235 0.360520094562648
84.2841976573691 0.336879432624114
84.2943094652146 0.354609929078014
84.3044212730601 0.230496453900709
84.3145330809057 0.401891252955083
84.3246448887512 0.41371158392435
84.3347566965967 0.407801418439716
84.3448685044423 0.342789598108747
84.3549803122878 0.384160756501182
84.3650921201333 0.319148936170213
84.3752039279789 0.372340425531915
84.3853157358244 0.348699763593381
84.3954275436699 0.325059101654846
84.4055393515155 0.295508274231679
84.415651159361 0.378250591016549
84.4257629672065 0.336879432624114
84.4358747750521 0.342789598108747
84.4459865828976 0.342789598108747
84.4560983907431 0.271867612293144
84.4662101985887 0.254137115839244
84.4763220064342 0.41371158392435
84.4864338142797 0.307328605200946
84.4965456221253 0.360520094562648
84.5066574299708 0.325059101654846
84.5167692378163 0.366430260047281
84.5268810456619 0.336879432624114
84.5369928535074 0.33096926713948
84.5471046613529 0.348699763593381
84.5572164691985 0.33096926713948
84.567328277044 0.325059101654846
84.5774400848895 0.260047281323877
84.5875518927351 0.390070921985816
84.5976637005806 0.360520094562648
84.6077755084261 0.336879432624114
84.6178873162717 0.325059101654846
84.6279991241172 0.372340425531915
84.6381109319627 0.360520094562648
84.6482227398083 0.360520094562648
84.6583345476538 0.348699763593381
84.6684463554993 0.342789598108747
84.6785581633449 0.390070921985816
84.6886699711904 0.33096926713948
84.6987817790359 0.33096926713948
84.7088935868815 0.271867612293144
84.719005394727 0.283687943262411
84.7291172025725 0.307328605200946
84.7392290104181 0.425531914893617
84.7493408182636 0.401891252955083
84.7594526261091 0.307328605200946
84.7695644339547 0.390070921985816
84.7796762418002 0.41371158392435
84.7897880496457 0.307328605200946
84.7998998574913 0.224586288416076
84.8100116653368 0.360520094562648
84.8201234731823 0.283687943262411
84.8302352810279 0.265957446808511
84.8403470888734 0.319148936170213
84.8504588967189 0.348699763593381
84.8605707045645 0.307328605200946
84.87068251241 0.325059101654846
84.8807943202555 0.325059101654846
84.8909061281011 0.301418439716312
84.9010179359466 0.354609929078014
84.9111297437921 0.24822695035461
84.9212415516377 0.354609929078014
84.9313533594832 0.325059101654846
84.9414651673287 0.260047281323877
84.9515769751742 0.384160756501182
84.9616887830198 0.307328605200946
84.9718005908653 0.271867612293144
84.9819123987108 0.325059101654846
84.9920242065564 0.372340425531915
85.0021360144019 0.360520094562648
85.0122478222474 0.366430260047281
85.022359630093 0.366430260047281
85.0324714379385 0.24822695035461
85.042583245784 0.24822695035461
85.0526950536296 0.401891252955083
85.0628068614751 0.378250591016549
85.0729186693206 0.283687943262411
85.0830304771662 0.348699763593381
85.0931422850117 0.301418439716312
85.1032540928572 0.425531914893617
85.1133659007028 0.354609929078014
85.1234777085483 0.342789598108747
85.1335895163938 0.33096926713948
85.1437013242394 0.384160756501182
85.1538131320849 0.313238770685579
85.1639249399304 0.372340425531915
85.174036747776 0.342789598108747
85.1841485556215 0.289598108747045
85.194260363467 0.366430260047281
85.2043721713126 0.301418439716312
85.2144839791581 0.425531914893617
85.2245957870036 0.342789598108747
85.2347075948492 0.295508274231679
85.2448194026947 0.336879432624114
85.2549312105402 0.283687943262411
85.2650430183858 0.348699763593381
85.2751548262313 0.325059101654846
85.2852666340768 0.395981087470449
85.2953784419224 0.301418439716312
85.3054902497679 0.283687943262411
85.3156020576134 0.271867612293144
85.325713865459 0.295508274231679
85.3358256733045 0.49645390070922
85.34593748115 0.378250591016549
85.3560492889956 0.342789598108747
85.3661610968411 0.395981087470449
85.3762729046866 0.325059101654846
85.3863847125322 0.319148936170213
85.3964965203777 0.401891252955083
85.4066083282232 0.354609929078014
85.4167201360688 0.360520094562648
85.4268319439143 0.313238770685579
85.4369437517598 0.395981087470449
85.4470555596054 0.384160756501182
85.4571673674509 0.41371158392435
85.4672791752964 0.360520094562648
85.477390983142 0.260047281323877
85.4875027909875 0.401891252955083
85.497614598833 0.342789598108747
85.5077264066786 0.289598108747045
85.5178382145241 0.41371158392435
85.5279500223696 0.325059101654846
85.5380618302152 0.354609929078014
85.5481736380607 0.378250591016549
85.5582854459062 0.360520094562648
85.5683972537518 0.348699763593381
85.5785090615973 0.301418439716312
85.5886208694428 0.348699763593381
85.5987326772884 0.360520094562648
85.6088444851339 0.342789598108747
85.6189562929794 0.384160756501182
85.629068100825 0.390070921985816
85.6391799086705 0.265957446808511
85.649291716516 0.295508274231679
85.6594035243616 0.295508274231679
85.6695153322071 0.301418439716312
85.6796271400526 0.33096926713948
85.6897389478981 0.313238770685579
85.6998507557437 0.265957446808511
85.7099625635892 0.212765957446809
85.7200743714347 0.425531914893617
85.7301861792803 0.336879432624114
85.7402979871258 0.277777777777778
85.7504097949713 0.342789598108747
85.7605216028169 0.265957446808511
85.7706334106624 0.325059101654846
85.7807452185079 0.301418439716312
85.7908570263535 0.325059101654846
85.800968834199 0.307328605200946
85.8110806420445 0.301418439716312
85.8211924498901 0.260047281323877
85.8313042577356 0.307328605200946
85.8414160655811 0.33096926713948
85.8515278734267 0.325059101654846
85.8616396812722 0.33096926713948
85.8717514891177 0.301418439716312
85.8818632969633 0.33096926713948
85.8919751048088 0.325059101654846
85.9020869126543 0.301418439716312
85.9121987204999 0.325059101654846
85.9223105283454 0.295508274231679
85.9324223361909 0.260047281323877
85.9425341440365 0.283687943262411
85.952645951882 0.360520094562648
85.9627577597275 0.360520094562648
85.9728695675731 0.336879432624114
85.9829813754186 0.378250591016549
85.9930931832641 0.366430260047281
86.0032049911097 0.319148936170213
86.0133167989552 0.295508274231679
86.0234286068007 0.283687943262411
86.0335404146463 0.283687943262411
86.0436522224918 0.265957446808511
86.0537640303373 0.342789598108747
86.0638758381829 0.301418439716312
86.0739876460284 0.390070921985816
86.0840994538739 0.325059101654846
86.0942112617195 0.295508274231679
86.104323069565 0.378250591016549
86.1144348774105 0.265957446808511
86.1245466852561 0.325059101654846
86.1346584931016 0.336879432624114
86.1447703009471 0.319148936170213
86.1548821087927 0.336879432624114
86.1649939166382 0.301418439716312
86.1751057244837 0.271867612293144
86.1852175323293 0.390070921985816
86.1953293401748 0.295508274231679
86.2054411480203 0.41371158392435
86.2155529558659 0.33096926713948
86.2256647637114 0.360520094562648
86.2357765715569 0.260047281323877
86.2458883794025 0.348699763593381
86.256000187248 0.236406619385343
86.2661119950935 0.33096926713948
86.2762238029391 0.366430260047281
86.2863356107846 0.307328605200946
86.2964474186301 0.319148936170213
86.3065592264757 0.336879432624114
86.3166710343212 0.319148936170213
86.3267828421667 0.33096926713948
86.3368946500123 0.348699763593381
86.3470064578578 0.378250591016549
86.3571182657033 0.342789598108747
86.3672300735489 0.33096926713948
86.3773418813944 0.390070921985816
86.3874536892399 0.230496453900709
86.3975654970855 0.301418439716312
86.407677304931 0.301418439716312
86.4177891127765 0.354609929078014
86.4279009206221 0.271867612293144
86.4380127284676 0.390070921985816
86.4481245363131 0.372340425531915
86.4582363441586 0.354609929078014
86.4683481520042 0.301418439716312
86.4784599598497 0.354609929078014
86.4885717676952 0.378250591016549
86.4986835755408 0.366430260047281
86.5087953833863 0.401891252955083
86.5189071912318 0.33096926713948
86.5290189990774 0.307328605200946
86.5391308069229 0.342789598108747
86.5492426147684 0.360520094562648
86.559354422614 0.348699763593381
86.5694662304595 0.289598108747045
86.579578038305 0.348699763593381
86.5896898461506 0.354609929078014
86.5998016539961 0.354609929078014
86.6099134618416 0.342789598108747
86.6200252696872 0.289598108747045
86.6301370775327 0.265957446808511
86.6402488853782 0.342789598108747
86.6503606932238 0.401891252955083
86.6604725010693 0.336879432624114
86.6705843089148 0.390070921985816
86.6806961167604 0.325059101654846
86.6908079246059 0.33096926713948
86.7009197324514 0.260047281323877
86.711031540297 0.354609929078014
86.7211433481425 0.360520094562648
86.731255155988 0.390070921985816
86.7413669638336 0.289598108747045
86.7514787716791 0.33096926713948
86.7615905795246 0.342789598108747
86.7717023873702 0.319148936170213
86.7818141952157 0.277777777777778
86.7919260030612 0.455082742316785
86.8020378109068 0.295508274231679
86.8121496187523 0.283687943262411
86.8222614265978 0.384160756501182
86.8323732344434 0.33096926713948
86.8424850422889 0.365691489361702
86.8525968501344 0.305851063829787
86.86270865798 0.352393617021277
86.8728204658255 0.305851063829787
86.882932273671 0.359042553191489
86.8930440815166 0.345744680851064
86.9031558893621 0.319148936170213
86.9132676972076 0.372340425531915
86.9233795050532 0.38563829787234
86.9334913128987 0.378989361702128
86.9436031207442 0.359042553191489
86.9537149285898 0.279255319148936
86.9638267364353 0.345744680851064
86.9739385442808 0.292553191489362
86.9840503521264 0.398936170212766
86.9941621599719 0.365691489361702
87.0042739678174 0.339095744680851
87.014385775663 0.365691489361702
87.0244975835085 0.405585106382979
87.034609391354 0.392287234042553
87.0447211991996 0.232712765957447
87.0548330070451 0.285904255319149
87.0649448148906 0.259308510638298
87.0750566227362 0.305851063829787
87.0851684305817 0.352393617021277
87.0952802384272 0.3125
87.1053920462728 0.345744680851064
87.1155038541183 0.352393617021277
87.1256156619638 0.332446808510638
87.1357274698094 0.319148936170213
87.1458392776549 0.372340425531915
87.1559510855004 0.3125
87.166062893346 0.285904255319149
87.1761747011915 0.425531914893617
87.186286509037 0.305851063829787
87.1963983168826 0.305851063829787
87.2065101247281 0.305851063829787
87.2166219325736 0.305851063829787
87.2267337404191 0.352393617021277
87.2368455482647 0.325797872340426
87.2469573561102 0.285904255319149
87.2570691639557 0.252659574468085
87.2671809718013 0.352393617021277
87.2772927796468 0.319148936170213
87.2874045874923 0.345744680851064
87.2975163953379 0.332446808510638
87.3076282031834 0.332446808510638
87.3177400110289 0.332446808510638
87.3278518188745 0.38563829787234
87.33796362672 0.345744680851064
87.3480754345655 0.372340425531915
87.3581872424111 0.352393617021277
87.3682990502566 0.292553191489362
87.3784108581021 0.43218085106383
87.3885226659477 0.345744680851064
87.3986344737932 0.265957446808511
87.4087462816387 0.339095744680851
87.4188580894843 0.265957446808511
87.4289698973298 0.352393617021277
87.4390817051753 0.252659574468085
87.4491935130209 0.352393617021277
87.4593053208664 0.325797872340426
87.4694171287119 0.372340425531915
87.4795289365575 0.352393617021277
87.489640744403 0.319148936170213
87.4997525522485 0.319148936170213
87.5098643600941 0.425531914893617
87.5199761679396 0.252659574468085
87.5300879757851 0.332446808510638
87.5401997836307 0.325797872340426
87.5503115914762 0.345744680851064
87.5604233993217 0.359042553191489
87.5705352071673 0.38563829787234
87.5806470150128 0.319148936170213
87.5907588228583 0.339095744680851
87.6008706307039 0.319148936170213
87.6109824385494 0.252659574468085
87.6210942463949 0.339095744680851
87.6312060542405 0.232712765957447
87.641317862086 0.365691489361702
87.6514296699315 0.352393617021277
87.6615414777771 0.365691489361702
87.6716532856226 0.299202127659574
87.6817650934681 0.259308510638298
87.6918769013137 0.285904255319149
87.7019887091592 0.272606382978723
87.7121005170047 0.305851063829787
87.7222123248503 0.372340425531915
87.7323241326958 0.365691489361702
87.7424359405413 0.319148936170213
87.7525477483869 0.285904255319149
87.7626595562324 0.3125
87.7727713640779 0.332446808510638
87.7828831719235 0.232712765957447
87.792994979769 0.418882978723404
87.8031067876145 0.265957446808511
87.8132185954601 0.305851063829787
87.8233304033056 0.319148936170213
87.8334422111511 0.259308510638298
87.8435540189967 0.378989361702128
87.8536658268422 0.339095744680851
87.8637776346877 0.285904255319149
87.8738894425333 0.325797872340426
87.8840012503788 0.232712765957447
87.8941130582243 0.412234042553192
87.9042248660699 0.418882978723404
87.9143366739154 0.339095744680851
87.9244484817609 0.206117021276596
87.9345602896065 0.378989361702128
87.944672097452 0.325797872340426
87.9547839052975 0.285904255319149
87.9648957131431 0.319148936170213
87.9750075209886 0.365691489361702
87.9851193288341 0.265957446808511
87.9952311366796 0.43218085106383
88.0053429445252 0.319148936170213
88.0154547523707 0.392287234042553
88.0255665602162 0.325797872340426
88.0356783680618 0.285904255319149
88.0457901759073 0.3125
88.0559019837528 0.339095744680851
88.0660137915984 0.3125
88.0761255994439 0.259308510638298
88.0862374072894 0.319148936170213
88.096349215135 0.292553191489362
88.1064610229805 0.3125
88.116572830826 0.339095744680851
88.1266846386716 0.3125
88.1367964465171 0.292553191489362
88.1469082543626 0.365691489361702
88.1570200622082 0.332446808510638
88.1671318700537 0.332446808510638
88.1772436778992 0.359042553191489
88.1873554857448 0.232712765957447
88.1974672935903 0.412234042553192
88.2075791014358 0.246010638297872
88.2176909092814 0.292553191489362
88.2278027171269 0.265957446808511
88.2379145249724 0.305851063829787
88.248026332818 0.319148936170213
88.2581381406635 0.292553191489362
88.268249948509 0.272606382978723
88.2783617563546 0.305851063829787
88.2884735642001 0.285904255319149
88.2985853720456 0.352393617021277
88.3086971798912 0.345744680851064
88.3188089877367 0.345744680851064
88.3289207955822 0.319148936170213
88.3390326034278 0.299202127659574
88.3491444112733 0.305851063829787
88.3592562191188 0.299202127659574
88.3693680269644 0.38563829787234
88.3794798348099 0.319148936170213
88.3895916426554 0.319148936170213
88.399703450501 0.319148936170213
88.4098152583465 0.285904255319149
88.419927066192 0.332446808510638
88.4300388740376 0.359042553191489
88.4401506818831 0.285904255319149
88.4502624897286 0.398936170212766
88.4603742975742 0.279255319148936
88.4704861054197 0.398936170212766
88.4805979132652 0.259308510638298
88.4907097211108 0.319148936170213
88.5008215289563 0.272606382978723
88.5109333368018 0.392287234042553
88.5210451446474 0.246010638297872
88.5311569524929 0.319148936170213
88.5412687603384 0.3125
88.551380568184 0.339095744680851
88.5614923760295 0.292553191489362
88.571604183875 0.285904255319149
88.5817159917206 0.265957446808511
88.5918277995661 0.305851063829787
88.6019396074116 0.365691489361702
88.6120514152572 0.299202127659574
88.6221632231027 0.365691489361702
88.6322750309482 0.319148936170213
88.6423868387938 0.319148936170213
88.6524986466393 0.305851063829787
88.6626104544848 0.319148936170213
88.6727222623304 0.259308510638298
88.6828340701759 0.319148936170213
88.6929458780214 0.292553191489362
88.703057685867 0.392287234042553
88.7131694937125 0.259308510638298
88.723281301558 0.319148936170213
88.7333931094036 0.23936170212766
88.7435049172491 0.359042553191489
88.7536167250946 0.392287234042553
88.7637285329401 0.226063829787234
88.7738403407857 0.252659574468085
88.7839521486312 0.372340425531915
88.7940639564767 0.325797872340426
88.8041757643223 0.352393617021277
88.8142875721678 0.352393617021277
88.8243993800133 0.259308510638298
88.8345111878589 0.23936170212766
88.8446229957044 0.345744680851064
88.8547348035499 0.392287234042553
88.8648466113955 0.259308510638298
88.874958419241 0.319148936170213
88.8850702270865 0.285904255319149
88.8951820349321 0.332446808510638
88.9052938427776 0.345744680851064
88.9154056506231 0.305851063829787
88.9255174584687 0.359042553191489
88.9356292663142 0.285904255319149
88.9457410741597 0.285904255319149
88.9558528820053 0.259308510638298
88.9659646898508 0.259308510638298
88.9760764976963 0.398936170212766
88.9861883055419 0.378989361702128
88.9963001133874 0.359042553191489
89.0064119212329 0.3125
89.0165237290785 0.372340425531915
89.026635536924 0.332446808510638
89.0367473447695 0.365691489361702
89.0468591526151 0.392287234042553
89.0569709604606 0.38563829787234
89.0670827683061 0.365691489361702
89.0771945761517 0.325797872340426
89.0873063839972 0.425531914893617
89.0974181918427 0.392287234042553
89.1075299996883 0.23936170212766
89.1176418075338 0.3125
89.1277536153793 0.292553191489362
89.1378654232249 0.332446808510638
89.1479772310704 0.3125
89.1580890389159 0.246010638297872
89.1682008467615 0.265957446808511
89.178312654607 0.365691489361702
89.1884244624525 0.285904255319149
89.1985362702981 0.299202127659574
89.2086480781436 0.332446808510638
89.2187598859891 0.325797872340426
89.2288716938347 0.305851063829787
89.2389835016802 0.265957446808511
89.2490953095257 0.292553191489362
89.2592071173713 0.352393617021277
89.2693189252168 0.38563829787234
89.2794307330623 0.325797872340426
89.2895425409079 0.378989361702128
89.2996543487534 0.339095744680851
89.3097661565989 0.279255319148936
89.3198779644445 0.352393617021277
89.32998977229 0.272606382978723
89.3401015801355 0.405585106382979
89.3502133879811 0.325797872340426
89.3603251958266 0.352393617021277
89.3704370036721 0.372340425531915
89.3805488115177 0.398936170212766
89.3906606193632 0.319148936170213
89.4007724272087 0.405585106382979
89.4108842350543 0.345744680851064
89.4209960428998 0.3125
89.4311078507453 0.259308510638298
89.4412196585909 0.452127659574468
89.4513314664364 0.332446808510638
89.4614432742819 0.325797872340426
89.4715550821275 0.292553191489362
89.481666889973 0.372340425531915
89.4917786978185 0.392287234042553
89.5018905056641 0.359042553191489
89.5120023135096 0.292553191489362
89.5221141213551 0.292553191489362
89.5322259292006 0.332446808510638
89.5423377370462 0.352393617021277
89.5524495448917 0.38563829787234
89.5625613527372 0.378989361702128
89.5726731605828 0.365691489361702
89.5827849684283 0.418882978723404
89.5928967762738 0.3125
89.6030085841194 0.345744680851064
89.6131203919649 0.252659574468085
89.6232321998104 0.345744680851064
89.633344007656 0.38563829787234
89.6434558155015 0.365691489361702
89.653567623347 0.365691489361702
89.6636794311926 0.445478723404255
89.6737912390381 0.345744680851064
89.6839030468836 0.319148936170213
89.6940148547292 0.252659574468085
89.7041266625747 0.365691489361702
89.7142384704202 0.345744680851064
89.7243502782658 0.325797872340426
89.7344620861113 0.359042553191489
89.7445738939568 0.352393617021277
89.7546857018024 0.458776595744681
89.7647975096479 0.472074468085106
89.7749093174934 0.38563829787234
89.785021125339 0.398936170212766
89.7951329331845 0.319148936170213
89.80524474103 0.359042553191489
89.8153565488756 0.405585106382979
89.8254683567211 0.38563829787234
89.8355801645666 0.405585106382979
89.8456919724122 0.43218085106383
89.8558037802577 0.325797872340426
89.8659155881032 0.352393617021277
89.8760273959488 0.292553191489362
89.8861392037943 0.365691489361702
89.8962510116398 0.412234042553192
89.9063628194854 0.3125
89.9164746273309 0.319148936170213
89.9265864351764 0.43218085106383
89.936698243022 0.43218085106383
89.9468100508675 0.332446808510638
89.956921858713 0.265957446808511
89.9670336665586 0.405585106382979
89.9771454744041 0.285904255319149
89.9872572822496 0.359042553191489
89.9973690900952 0.492021276595745
