# Supplementary material for: Gd3+-Doped Magnetic Nanoparticles for Biomedical Applications
Source: Hindawi journal article supplement (doi:10.1155/2018/1412563), 2018-08-02
Supplement: f1 [file 1412563.f1.zip › MNP-Gd2.5.xye]

'Id: "" Comment: "" Operator: "Lab Manager" Anode: "Cu" Scantype: "Coupled TwoTheta/Theta" TimePerStep: "18.8" 
4.99751234054565 3.2446809827391 0.415438829407517
5.01773595623672 3.19148949121879 0.412019521636212
5.03795957192779 4.41489379618599 0.48459755047143
5.05818318761885 3.6170214233813 0.438628275844795
5.07840680330992 2.97872352513754 0.398048674321006
5.09863041900098 3.51063844034067 0.432129719910892
5.11885403469205 3.2446809827391 0.415438829407517
5.13907765038311 3.67021291490161 0.441841712766838
5.15930126607418 3.19148949121879 0.412019521636212
5.17952488176525 3.19148949121879 0.412019521636212
5.19974849745631 3.88297888098286 0.454468302768581
5.21997211314738 2.97872352513754 0.398048674321006
5.24019572883844 2.50000010145472 0.364662493543428
5.26041934452951 2.76595755905628 0.383569300189794
5.28064296022058 3.2446809827391 0.415438829407517
5.30086657591164 2.92553203361722 0.394478658939308
5.32109019160271 3.19148949121879 0.412019521636212
5.34131380729377 3.03191501665785 0.401586954343472
5.36153742298484 2.55319159297503 0.368521463374206
5.3817610386759 3.93617037250317 0.457570511496874
5.40198465436697 3.51063844034067 0.432129719910892
5.42220827005804 3.72340440642192 0.445031947067723
5.4424318857491 3.40425545730004 0.425531932162505
5.46265550144017 4.0425533555438 0.463712672386492
5.48287911713123 2.92553203361722 0.394478658939308
5.5031027328223 3.77659589794223 0.448199474208799
5.52332634851336 3.29787247425942 0.418830223061378
5.54354996420443 3.35106396577973 0.422194375282049
5.5637735798955 3.03191501665785 0.401586954343472
5.58399719558656 3.6170214233813 0.438628275844795
5.60422081127763 3.2446809827391 0.415438829407517
5.62444442696869 4.09574484706411 0.466753443803018
5.64466804265976 4.20212783010474 0.472776317979537
5.66489165835083 3.67021291490161 0.441841712766838
5.68511527404189 4.78723423682818 0.504618796037166
5.70533888973296 3.56382993186098 0.435391122555825
5.72556250542402 3.40425545730004 0.425531932162505
5.74578612111509 3.40425545730004 0.425531932162505
5.76600973680615 3.19148949121879 0.412019521636212
5.78623335249722 3.45744694882036 0.428843514653201
5.80645696818829 3.56382993186098 0.435391122555825
5.82668058387935 3.40425545730004 0.425531932162505
5.84690419957042 3.35106396577973 0.422194375282049
5.86712781526148 3.67021291490161 0.441841712766838
5.88735143095255 3.67021291490161 0.441841712766838
5.90757504664361 4.41489379618599 0.48459755047143
5.92779866233468 4.57446827074693 0.493277599565779
5.94802227802575 4.20212783010474 0.472776317979537
5.96824589371681 3.2446809827391 0.415438829407517
5.98846950940788 2.8191490505766 0.387239903442613
6.00869312509894 4.52127677922662 0.490401320821245
6.02891674079001 4.25531932162505 0.475759163456095
6.04914035648108 4.36170230466568 0.481669441788406
6.06936397217214 3.77659589794223 0.448199474208799
6.08958758786321 4.41489379618599 0.48459755047143
6.10981120355427 4.25531932162505 0.475759163456095
6.13003481924534 4.0425533555438 0.463712672386492
6.1502584349364 3.93617037250317 0.457570511496874
6.17048205062747 3.56382993186098 0.435391122555825
6.19070566631854 4.25531932162505 0.475759163456095
6.2109292820096 4.41489379618599 0.48459755047143
6.23115289770067 3.77659589794223 0.448199474208799
6.25137651339173 4.73404274530787 0.501807527388583
6.2716001290828 4.20212783010474 0.472776317979537
6.29182374477386 4.52127677922662 0.490401320821245
6.31204736046493 4.36170230466568 0.481669441788406
6.332270976156 3.88297888098286 0.454468302768581
6.35249459184706 4.25531932162505 0.475759163456095
6.37271820753813 4.20212783010474 0.472776317979537
6.39294182322919 4.25531932162505 0.475759163456095
6.41316543892026 4.78723423682818 0.504618796037166
6.43338905461133 3.82978738946255 0.451344772265282
6.45361267030239 4.46808528770631 0.487508072438874
6.47383628599346 4.52127677922662 0.490401320821245
6.49405990168452 5.42553213507194 0.537207731288247
6.51428351737559 5.15957467747038 0.523875436249008
6.53450713306665 3.29787247425942 0.418830223061378
6.55473074875772 5.31914915203132 0.531914915203132
6.57495436444879 3.88297888098286 0.454468302768581
6.59517798013985 4.89361721986881 0.510194863610278
6.61540159583092 4.78723423682818 0.504618796037166
6.63562521152198 4.68085125378756 0.498980420230782
6.65584882721305 4.41489379618599 0.48459755047143
6.67607244290411 4.8404257283485 0.507414489430638
6.69629605859518 3.82978738946255 0.451344772265282
6.71651967428625 3.82978738946255 0.451344772265282
6.73674328997731 5.05319169442975 0.518446528742142
6.75696690566838 5.05319169442975 0.518446528742142
6.77719052135944 4.94680871138912 0.512960167678218
6.79741413705051 5.05319169442975 0.518446528742142
6.81763775274158 5.37234064355163 0.534567873881054
6.83786136843264 5.10638318595006 0.521168051529382
6.85808498412371 5.15957467747038 0.523875436249008
6.87830859981477 3.98936186402349 0.460651829217758
6.89853221550584 5.74468108419382 0.552782195061309
6.9187558311969 4.68085125378756 0.498980420230782
6.93897944688797 5.37234064355163 0.534567873881054
6.95920306257904 4.68085125378756 0.498980420230782
6.9794266782701 5.15957467747038 0.523875436249008
6.99965029396117 5.69148959267351 0.550217066626112
7.01987390965223 5.10638318595006 0.521168051529382
7.0400975253433 5.00000020290944 0.515710644057907
7.06032114103436 5.265957660511 0.529248658236749
7.08054475672543 5.47872362659226 0.539834679625181
7.1007683724165 5.47872362659226 0.539834679625181
7.12099198810756 5.00000020290944 0.515710644057907
7.14121560379863 5.37234064355163 0.534567873881054
7.16143921948969 5.47872362659226 0.539834679625181
7.18166283518076 4.62765976226725 0.49613720380912
7.20188645087183 5.265957660511 0.529248658236749
7.22211006656289 5.58510660963288 0.545050594776606
7.24233368225396 6.32978749091727 0.580250667943183
7.26255729794502 5.47872362659226 0.539834679625181
7.28278091363609 5.31914915203132 0.531914915203132
7.30300452932715 4.68085125378756 0.498980420230782
7.32322814501822 5.6382981011532 0.547639923340591
7.34345176070929 6.11702152483601 0.570415198401908
7.36367537640035 5.85106406723445 0.55787706953872
7.38389899209142 6.64893644003915 0.594698954320119
7.40412260778248 6.22340450787664 0.575353950284691
7.42434622347355 5.69148959267351 0.550217066626112
7.44456983916461 5.47872362659226 0.539834679625181
7.46479345485568 7.07446837220165 0.613434205461912
7.48501707054675 6.11702152483601 0.570415198401908
7.50524068623781 7.76595776196572 0.64271523744401
7.52546430192888 5.95744705027507 0.562925833709398
7.54568791761994 6.22340450787664 0.575353950284691
7.56591153331101 4.8404257283485 0.507414489430638
7.58613514900208 5.69148959267351 0.550217066626112
7.60635876469314 5.37234064355163 0.534567873881054
7.62658238038421 6.11702152483601 0.570415198401908
7.64680599607527 6.59574494851883 0.59231538178515
7.66702961176634 7.02127688068134 0.611123710602471
7.6872532274574 6.11702152483601 0.570415198401908
7.70747684314847 6.8617024061204 0.604139210240542
7.72770045883954 7.07446837220165 0.613434205461912
7.7479240745306 7.55319179588447 0.633849775074574
7.76814769022167 6.75531942307977 0.599437666325494
7.78837130591273 5.95744705027507 0.562925833709398
7.8085949216038 5.90425555875476 0.560407137255822
7.82881853729486 7.12765986372196 0.615736030455294
7.84904215298593 7.34042582980322 0.624858542617019
7.869265768677 5.90425555875476 0.560407137255822
7.88948938436806 6.91489389764071 0.606476314558303
7.90971300005913 5.74468108419382 0.552782195061309
7.92993661575019 7.2872343382829 0.622590446048853
7.95016023144126 6.43617047395789 0.585106406723445
7.97038384713233 7.02127688068134 0.611123710602471
7.99060746282339 6.32978749091727 0.580250667943183
8.01083107851446 7.34042582980322 0.624858542617019
8.03105469420552 7.55319179588447 0.633849775074574
8.05127830989659 7.44680881284384 0.629370215232479
8.07150192558765 6.48936196547821 0.587519226884514
8.09172554127872 7.55319179588447 0.633849775074574
8.11194915696979 7.18085135524228 0.618029282454318
8.13217277266085 7.50000030436416 0.631613966431975
8.15239638835192 6.17021301635633 0.572889896348368
8.17262000404298 8.35106416868917 0.666487478437833
8.19284361973405 6.32978749091727 0.580250667943183
8.21306723542511 6.27659599939695 0.5778074963847
8.23329085111618 7.23404284676259 0.620314056540036
8.25351446680725 5.265957660511 0.529248658236749
8.27373808249831 7.23404284676259 0.620314056540036
8.29396169818938 6.27659599939695 0.5778074963847
8.31418531388044 7.39361732132353 0.62711843622367
8.33440892957151 8.0851067110876 0.655788750333248
8.35463254526258 7.76595776196572 0.64271523744401
8.37485616095364 7.34042582980322 0.624858542617019
8.39507977664471 7.97872372804697 0.651460064411727
8.41530339233577 7.76595776196572 0.64271523744401
8.43552700802684 5.79787257571413 0.555335475138186
8.4557506237179 7.60638328740478 0.636077724914372
8.47597423940897 8.82978759237199 0.685324428169477
8.49619785510004 7.12765986372196 0.615736030455294
8.5164214707911 7.12765986372196 0.615736030455294
8.53664508648217 6.80851091460008 0.601793029687043
8.55686870217323 7.76595776196572 0.64271523744401
8.5770923178643 7.92553223652666 0.64928489952653
8.59731593355536 7.34042582980322 0.624858542617019
8.61753954924643 8.56383013477042 0.674924364647657
8.6377631649375 7.71276627044541 0.640510375928879
8.65798678062856 6.38297898243758 0.582683595460406
8.67821039631963 7.44680881284384 0.629370215232479
8.69843401201069 7.6595747789251 0.638297898243758
8.71865762770176 7.50000030436416 0.631613966431975
8.73888124339283 7.60638328740478 0.636077724914372
8.75910485908389 8.19148969412823 0.660089050510576
8.77932847477496 7.97872372804697 0.651460064411727
8.79955209046602 6.01063854179539 0.565433310857768
8.81977570615709 8.45744715172979 0.670719187480671
8.83999932184815 7.2872343382829 0.622590446048853
8.86022293753922 7.92553223652666 0.64928489952653
8.88044655323029 8.13829820260791 0.657942413767192
8.90067016892135 6.75531942307977 0.599437666325494
8.92089378461242 8.03191521956729 0.653627990751228
8.94111740030348 7.18085135524228 0.618029282454318
8.96134101599455 8.03191521956729 0.653627990751228
8.98156463168561 7.18085135524228 0.618029282454318
9.00178824737668 7.50000030436416 0.631613966431975
9.02201186306775 8.40425566020948 0.668606680855476
9.04223547875881 7.34042582980322 0.624858542617019
9.06245909444988 8.0851067110876 0.655788750333248
9.08268271014094 7.2872343382829 0.622590446048853
9.10290632583201 9.04255355845324 0.693532198911084
9.12312994152308 6.59574494851883 0.59231538178515
9.14335355721414 7.07446837220165 0.613434205461912
9.16357717290521 7.34042582980322 0.624858542617019
9.18380078859627 8.13829820260791 0.657942413767192
9.20402440428734 7.39361732132353 0.62711843622367
9.2242480199784 7.34042582980322 0.624858542617019
9.24447163566947 7.34042582980322 0.624858542617019
9.26469525136054 8.03191521956729 0.653627990751228
9.2849188670516 8.13829820260791 0.657942413767192
9.30514248274267 6.38297898243758 0.582683595460406
9.32536609843373 8.24468118564854 0.662228728895168
9.3455897141248 7.87234074500635 0.647102423100873
9.36581332981586 8.45744715172979 0.670719187480671
9.38603694550693 7.02127688068134 0.611123710602471
9.406260561198 8.13829820260791 0.657942413767192
9.42648417688906 8.29787267716885 0.664361516152362
9.44670779258013 7.50000030436416 0.631613966431975
9.46693140827119 5.10638318595006 0.521168051529382
9.48715502396226 7.76595776196572 0.64271523744401
9.50737863965333 8.13829820260791 0.657942413767192
9.52760225534439 7.39361732132353 0.62711843622367
9.54782587103546 7.71276627044541 0.640510375928879
9.56804948672652 7.34042582980322 0.624858542617019
9.58827310241759 8.29787267716885 0.664361516152362
9.60849671810865 7.12765986372196 0.615736030455294
9.62872033379972 7.12765986372196 0.615736030455294
9.64894394949079 7.23404284676259 0.620314056540036
9.66916756518185 7.12765986372196 0.615736030455294
9.68939118087292 8.82978759237199 0.685324428169477
9.70961479656398 8.56383013477042 0.674924364647657
9.72983841225505 8.24468118564854 0.662228728895168
9.75006202794611 8.0851067110876 0.655788750333248
9.77028564363718 7.92553223652666 0.64928489952653
9.79050925932825 8.03191521956729 0.653627990751228
9.81073287501931 8.13829820260791 0.657942413767192
9.83095649071038 7.55319179588447 0.633849775074574
9.85118010640144 7.23404284676259 0.620314056540036
9.87140372209251 7.44680881284384 0.629370215232479
9.89162733778358 8.72340460933136 0.681183457157842
9.91185095347464 8.93617057541261 0.68944052780942
9.93207456916571 7.2872343382829 0.622590446048853
9.95229818485677 7.39361732132353 0.62711843622367
9.97252180054784 7.18085135524228 0.618029282454318
9.9927454162389 6.64893644003915 0.594698954320119
10.01296903193 6.59574494851883 0.59231538178515
10.033192647621 7.76595776196572 0.64271523744401
10.0534162633121 7.97872372804697 0.651460064411727
10.0736398790032 7.6595747789251 0.638297898243758
10.0938634946942 7.50000030436416 0.631613966431975
10.1140871103853 8.61702162629073 0.677017158397923
10.1343107260764 7.55319179588447 0.633849775074574
10.1545343417674 8.67021311781104 0.679103502814817
10.1747579574585 8.24468118564854 0.662228728895168
10.1949815731496 8.03191521956729 0.653627990751228
10.2152051888406 7.39361732132353 0.62711843622367
10.2354288045317 8.13829820260791 0.657942413767192
10.2556524202228 7.55319179588447 0.633849775074574
10.2758760359138 7.60638328740478 0.636077724914372
10.2960996516049 7.6595747789251 0.638297898243758
10.316323267296 6.8617024061204 0.604139210240542
10.336546882987 8.51063864325011 0.672825061382888
10.3567704986781 7.71276627044541 0.640510375928879
10.3769941143692 7.34042582980322 0.624858542617019
10.3972177300602 6.70212793155946 0.59707301148151
10.4174413457513 6.64893644003915 0.594698954320119
10.4376649614424 7.81914925348604 0.64491256090486
10.4578885771334 7.87234074500635 0.647102423100873
10.4781121928245 7.97872372804697 0.651460064411727
10.4983358085155 7.07446837220165 0.613434205461912
10.5185594242066 6.91489389764071 0.606476314558303
10.5387830398977 8.03191521956729 0.653627990751228
10.5590066555887 6.22340450787664 0.575353950284691
10.5792302712798 7.81914925348604 0.64491256090486
10.5994538869709 7.81914925348604 0.64491256090486
10.6196775026619 8.0851067110876 0.655788750333248
10.639901118353 7.87234074500635 0.647102423100873
10.6601247340441 6.80851091460008 0.601793029687043
10.6803483497351 7.71276627044541 0.640510375928879
10.7005719654262 7.18085135524228 0.618029282454318
10.7207955811173 7.76595776196572 0.64271523744401
10.7410191968083 8.61702162629073 0.677017158397923
10.7612428124994 6.64893644003915 0.594698954320119
10.7814664281905 7.6595747789251 0.638297898243758
10.8016900438815 7.07446837220165 0.613434205461912
10.8219136595726 7.02127688068134 0.611123710602471
10.8421372752637 8.13829820260791 0.657942413767192
10.8623608909547 8.45744715172979 0.670719187480671
10.8825845066458 7.55319179588447 0.633849775074574
10.9028081223369 8.13829820260791 0.657942413767192
10.9230317380279 7.60638328740478 0.636077724914372
10.943255353719 7.12765986372196 0.615736030455294
10.9634789694101 7.50000030436416 0.631613966431975
10.9837025851011 8.03191521956729 0.653627990751228
11.0039262007922 7.81914925348604 0.64491256090486
11.0241498164833 7.12765986372196 0.615736030455294
11.0443734321743 7.60638328740478 0.636077724914372
11.0645970478654 7.71276627044541 0.640510375928879
11.0848206635565 6.32978749091727 0.580250667943183
11.1050442792475 8.61702162629073 0.677017158397923
11.1252678949386 7.76595776196572 0.64271523744401
11.1454915106297 7.07446837220165 0.613434205461912
11.1657151263207 6.91489389764071 0.606476314558303
11.1859387420118 7.6595747789251 0.638297898243758
11.2061623577029 7.71276627044541 0.640510375928879
11.2263859733939 6.32978749091727 0.580250667943183
11.246609589085 8.40425566020948 0.668606680855476
11.266833204776 7.18085135524228 0.618029282454318
11.2870568204671 7.87234074500635 0.647102423100873
11.3072804361582 6.32978749091727 0.580250667943183
11.3275040518492 7.76595776196572 0.64271523744401
11.3477276675403 7.44680881284384 0.629370215232479
11.3679512832314 7.07446837220165 0.613434205461912
11.3881748989224 6.96808538916102 0.608804447167049
11.4083985146135 7.50000030436416 0.631613966431975
11.4286221303046 7.50000030436416 0.631613966431975
11.4488457459956 6.91489389764071 0.606476314558303
11.4690693616867 6.48936196547821 0.587519226884514
11.4892929773778 6.64893644003915 0.594698954320119
11.5095165930688 6.64893644003915 0.594698954320119
11.5297402087599 8.0851067110876 0.655788750333248
11.549963824451 8.51063864325011 0.672825061382888
11.570187440142 7.2872343382829 0.622590446048853
11.5904110558331 6.80851091460008 0.601793029687043
11.6106346715242 6.54255345699852 0.5899221785364
11.6308582872152 5.90425555875476 0.560407137255822
11.6510819029063 7.23404284676259 0.620314056540036
11.6713055185974 5.95744705027507 0.562925833709398
11.6915291342884 7.55319179588447 0.633849775074574
11.7117527499795 8.45744715172979 0.670719187480671
11.7319763656706 6.17021301635633 0.572889896348368
11.7521999813616 7.23404284676259 0.620314056540036
11.7724235970527 7.60638328740478 0.636077724914372
11.7926472127438 8.0851067110876 0.655788750333248
11.8128708284348 6.22340450787664 0.575353950284691
11.8330944441259 7.92553223652666 0.64928489952653
11.853318059817 6.8617024061204 0.604139210240542
11.873541675508 6.91489389764071 0.606476314558303
11.8937652911991 6.91489389764071 0.606476314558303
11.9139889068902 7.02127688068134 0.611123710602471
11.9342125225812 6.80851091460008 0.601793029687043
11.9544361382723 6.96808538916102 0.608804447167049
11.9746597539634 7.12765986372196 0.615736030455294
11.9948833696544 8.35106416868917 0.666487478437833
12.0151069853455 7.2872343382829 0.622590446048853
12.0353306010365 8.93617057541261 0.68944052780942
12.0555542167276 7.44680881284384 0.629370215232479
12.0757778324187 8.24468118564854 0.662228728895168
12.0960014481097 6.64893644003915 0.594698954320119
12.1162250638008 6.38297898243758 0.582683595460406
12.1364486794919 7.39361732132353 0.62711843622367
12.1566722951829 6.8617024061204 0.604139210240542
12.176895910874 7.2872343382829 0.622590446048853
12.1971195265651 7.23404284676259 0.620314056540036
12.2173431422561 7.6595747789251 0.638297898243758
12.2375667579472 7.76595776196572 0.64271523744401
12.2577903736383 7.07446837220165 0.613434205461912
12.2780139893293 6.96808538916102 0.608804447167049
12.2982376050204 7.76595776196572 0.64271523744401
12.3184612207115 6.75531942307977 0.599437666325494
12.3386848364025 7.02127688068134 0.611123710602471
12.3589084520936 8.19148969412823 0.660089050510576
12.3791320677847 6.38297898243758 0.582683595460406
12.3993556834757 8.19148969412823 0.660089050510576
12.4195792991668 7.81914925348604 0.64491256090486
12.4398029148579 7.71276627044541 0.640510375928879
12.4600265305489 7.92553223652666 0.64928489952653
12.48025014624 7.44680881284384 0.629370215232479
12.5004737619311 7.44680881284384 0.629370215232479
12.5206973776221 8.19148969412823 0.660089050510576
12.5409209933132 6.54255345699852 0.5899221785364
12.5611446090043 8.24468118564854 0.662228728895168
12.5813682246953 7.81914925348604 0.64491256090486
12.6015918403864 7.6595747789251 0.638297898243758
12.6218154560775 8.0851067110876 0.655788750333248
12.6420390717685 9.14893654149386 0.697599871320769
12.6622626874596 6.70212793155946 0.59707301148151
12.6824863031507 6.91489389764071 0.606476314558303
12.7027099188417 6.64893644003915 0.594698954320119
12.7229335345328 8.45744715172979 0.670719187480671
12.7431571502239 6.8617024061204 0.604139210240542
12.7633807659149 8.35106416868917 0.666487478437833
12.783604381606 6.27659599939695 0.5778074963847
12.803827997297 7.71276627044541 0.640510375928879
12.8240516129881 8.40425566020948 0.668606680855476
12.8442752286792 7.39361732132353 0.62711843622367
12.8644988443702 7.07446837220165 0.613434205461912
12.8847224600613 8.56383013477042 0.674924364647657
12.9049460757524 7.2872343382829 0.622590446048853
12.9251696914434 6.96808538916102 0.608804447167049
12.9453933071345 7.71276627044541 0.640510375928879
12.9656169228256 8.13829820260791 0.657942413767192
12.9858405385166 7.02127688068134 0.611123710602471
13.0060641542077 6.38297898243758 0.582683595460406
13.0262877698988 7.81914925348604 0.64491256090486
13.0465113855898 7.02127688068134 0.611123710602471
13.0667350012809 9.36170250757512 0.705664877648999
13.086958616972 5.74468108419382 0.552782195061309
13.107182232663 7.97872372804697 0.651460064411727
13.1274058483541 6.38297898243758 0.582683595460406
13.1476294640452 7.6595747789251 0.638297898243758
13.1678530797362 9.36170250757512 0.705664877648999
13.1880766954273 6.59574494851883 0.59231538178515
13.2083003111184 8.40425566020948 0.668606680855476
13.2285239268094 7.12765986372196 0.615736030455294
13.2487475425005 6.54255345699852 0.5899221785364
13.2689711581916 6.91489389764071 0.606476314558303
13.2891947738826 8.35106416868917 0.666487478437833
13.3094183895737 6.96808538916102 0.608804447167049
13.3296420052648 7.23404284676259 0.620314056540036
13.3498656209558 6.64893644003915 0.594698954320119
13.3700892366469 6.54255345699852 0.5899221785364
13.390312852338 6.91489389764071 0.606476314558303
13.410536468029 8.03191521956729 0.653627990751228
13.4307600837201 6.75531942307977 0.599437666325494
13.4509836994112 7.39361732132353 0.62711843622367
13.4712073151022 6.96808538916102 0.608804447167049
13.4914309307933 6.91489389764071 0.606476314558303
13.5116545464844 7.71276627044541 0.640510375928879
13.5318781621754 7.50000030436416 0.631613966431975
13.5521017778665 7.50000030436416 0.631613966431975
13.5723253935575 6.11702152483601 0.570415198401908
13.5925490092486 7.07446837220165 0.613434205461912
13.6127726249397 8.29787267716885 0.664361516152362
13.6329962406307 7.6595747789251 0.638297898243758
13.6532198563218 6.75531942307977 0.599437666325494
13.6734434720129 6.96808538916102 0.608804447167049
13.6936670877039 6.91489389764071 0.606476314558303
13.713890703395 6.91489389764071 0.606476314558303
13.7341143190861 7.2872343382829 0.622590446048853
13.7543379347771 8.45744715172979 0.670719187480671
13.7745615504682 7.07446837220165 0.613434205461912
13.7947851661593 7.44680881284384 0.629370215232479
13.8150087818503 7.44680881284384 0.629370215232479
13.8352323975414 6.64893644003915 0.594698954320119
13.8554560132325 7.50000030436416 0.631613966431975
13.8756796289235 7.2872343382829 0.622590446048853
13.8959032446146 7.39361732132353 0.62711843622367
13.9161268603057 7.60638328740478 0.636077724914372
13.9363504759967 7.50000030436416 0.631613966431975
13.9565740916878 7.76595776196572 0.64271523744401
13.9767977073789 5.69148959267351 0.550217066626112
13.9970213230699 6.64893644003915 0.594698954320119
14.017244938761 6.70212793155946 0.59707301148151
14.0374685544521 7.2872343382829 0.622590446048853
14.0576921701431 8.35106416868917 0.666487478437833
14.0779157858342 7.6595747789251 0.638297898243758
14.0981394015253 7.18085135524228 0.618029282454318
14.1183630172163 8.51063864325011 0.672825061382888
14.1385866329074 7.12765986372196 0.615736030455294
14.1588102485985 7.50000030436416 0.631613966431975
14.1790338642895 7.92553223652666 0.64928489952653
14.1992574799806 7.34042582980322 0.624858542617019
14.2194810956717 6.91489389764071 0.606476314558303
14.2397047113627 7.50000030436416 0.631613966431975
14.2599283270538 7.18085135524228 0.618029282454318
14.2801519427449 6.8617024061204 0.604139210240542
14.3003755584359 7.34042582980322 0.624858542617019
14.320599174127 8.82978759237199 0.685324428169477
14.340822789818 8.03191521956729 0.653627990751228
14.3610464055091 7.34042582980322 0.624858542617019
14.3812700212002 7.23404284676259 0.620314056540036
14.4014936368912 7.55319179588447 0.633849775074574
14.4217172525823 6.54255345699852 0.5899221785364
14.4419408682734 6.91489389764071 0.606476314558303
14.4621644839644 7.92553223652666 0.64928489952653
14.4823880996555 8.51063864325011 0.672825061382888
14.5026117153466 7.34042582980322 0.624858542617019
14.5228353310376 7.34042582980322 0.624858542617019
14.5430589467287 5.90425555875476 0.560407137255822
14.5632825624198 8.98936206693292 0.691489389764071
14.5835061781108 6.70212793155946 0.59707301148151
14.6037297938019 6.8617024061204 0.604139210240542
14.623953409493 6.96808538916102 0.608804447167049
14.644177025184 7.18085135524228 0.618029282454318
14.6644006408751 7.2872343382829 0.622590446048853
14.6846242565662 7.2872343382829 0.622590446048853
14.7048478722572 6.54255345699852 0.5899221785364
14.7250714879483 7.50000030436416 0.631613966431975
14.7452951036394 8.24468118564854 0.662228728895168
14.7655187193304 8.0851067110876 0.655788750333248
14.7857423350215 7.55319179588447 0.633849775074574
14.8059659507126 7.50000030436416 0.631613966431975
14.8261895664036 7.50000030436416 0.631613966431975
14.8464131820947 7.71276627044541 0.640510375928879
14.8666367977858 7.87234074500635 0.647102423100873
14.8868604134768 7.18085135524228 0.618029282454318
14.9070840291679 7.60638328740478 0.636077724914372
14.927307644859 8.24468118564854 0.662228728895168
14.94753126055 8.0851067110876 0.655788750333248
14.9677548762411 6.75531942307977 0.599437666325494
14.9879784919322 6.8617024061204 0.604139210240542
15.0082021076232 7.34042582980322 0.624858542617019
15.0284257233143 7.81914925348604 0.64491256090486
15.0486493390054 8.29787267716885 0.664361516152362
15.0688729546964 7.07446837220165 0.613434205461912
15.0890965703875 6.32978749091727 0.580250667943183
15.1093201860785 6.96808538916102 0.608804447167049
15.1295438017696 7.02127688068134 0.611123710602471
15.1497674174607 6.70212793155946 0.59707301148151
15.1699910331517 7.34042582980322 0.624858542617019
15.1902146488428 6.75531942307977 0.599437666325494
15.2104382645339 6.80851091460008 0.601793029687043
15.2306618802249 7.50000030436416 0.631613966431975
15.250885495916 8.29787267716885 0.664361516152362
15.2711091116071 8.29787267716885 0.664361516152362
15.2913327272981 7.18085135524228 0.618029282454318
15.3115563429892 7.55319179588447 0.633849775074574
15.3317799586803 8.24468118564854 0.662228728895168
15.3520035743713 6.43617047395789 0.585106406723445
15.3722271900624 6.59574494851883 0.59231538178515
15.3924508057535 7.44680881284384 0.629370215232479
15.4126744214445 6.59574494851883 0.59231538178515
15.4328980371356 7.23404284676259 0.620314056540036
15.4531216528267 7.23404284676259 0.620314056540036
15.4733452685177 7.60638328740478 0.636077724914372
15.4935688842088 8.0851067110876 0.655788750333248
15.5137924998999 7.92553223652666 0.64928489952653
15.5340161155909 6.80851091460008 0.601793029687043
15.554239731282 7.44680881284384 0.629370215232479
15.5744633469731 7.12765986372196 0.615736030455294
15.5946869626641 7.87234074500635 0.647102423100873
15.6149105783552 7.12765986372196 0.615736030455294
15.6351341940463 8.03191521956729 0.653627990751228
15.6553578097373 8.35106416868917 0.666487478437833
15.6755814254284 7.6595747789251 0.638297898243758
15.6958050411195 7.81914925348604 0.64491256090486
15.7160286568105 7.39361732132353 0.62711843622367
15.7362522725016 7.44680881284384 0.629370215232479
15.7564758881927 7.23404284676259 0.620314056540036
15.7766995038837 6.0638300333157 0.567929717304644
15.7969231195748 7.02127688068134 0.611123710602471
15.8171467352659 6.75531942307977 0.599437666325494
15.8373703509569 8.0851067110876 0.655788750333248
15.857593966648 8.45744715172979 0.670719187480671
15.877817582339 7.60638328740478 0.636077724914372
15.8980411980301 6.75531942307977 0.599437666325494
15.9182648137212 6.38297898243758 0.582683595460406
15.9384884294122 7.76595776196572 0.64271523744401
15.9587120451033 8.40425566020948 0.668606680855476
15.9789356607944 6.38297898243758 0.582683595460406
15.9991592764854 7.71276627044541 0.640510375928879
16.0193828921765 7.34042582980322 0.624858542617019
16.0396065078676 6.59574494851883 0.59231538178515
16.0598301235586 8.67021311781104 0.679103502814817
16.0800537392497 7.81914925348604 0.64491256090486
16.1002773549408 7.87234074500635 0.647102423100873
16.1205009706318 7.55319179588447 0.633849775074574
16.1407245863229 6.64893644003915 0.594698954320119
16.160948202014 6.01063854179539 0.565433310857768
16.181171817705 7.92553223652666 0.64928489952653
16.2013954333961 7.2872343382829 0.622590446048853
16.2216190490872 6.96808538916102 0.608804447167049
16.2418426647782 7.12765986372196 0.615736030455294
16.2620662804693 6.64893644003915 0.594698954320119
16.2822898961604 6.43617047395789 0.585106406723445
16.3025135118514 6.70212793155946 0.59707301148151
16.3227371275425 8.0851067110876 0.655788750333248
16.3429607432336 7.71276627044541 0.640510375928879
16.3631843589246 7.2872343382829 0.622590446048853
16.3834079746157 7.18085135524228 0.618029282454318
16.4036315903068 7.50000030436416 0.631613966431975
16.4238552059978 7.34042582980322 0.624858542617019
16.4440788216889 7.07446837220165 0.613434205461912
16.46430243738 7.55319179588447 0.633849775074574
16.484526053071 7.12765986372196 0.615736030455294
16.5047496687621 5.6382981011532 0.547639923340591
16.5249732844532 6.32978749091727 0.580250667943183
16.5451969001442 5.79787257571413 0.555335475138186
16.5654205158353 7.2872343382829 0.622590446048853
16.5856441315264 6.91489389764071 0.606476314558303
16.6058677472174 6.8617024061204 0.604139210240542
16.6260913629085 8.03191521956729 0.653627990751228
16.6463149785995 6.0638300333157 0.567929717304644
16.6665385942906 6.38297898243758 0.582683595460406
16.6867622099817 7.12765986372196 0.615736030455294
16.7069858256727 7.44680881284384 0.629370215232479
16.7272094413638 7.92553223652666 0.64928489952653
16.7474330570549 8.67021311781104 0.679103502814817
16.7676566727459 6.22340450787664 0.575353950284691
16.787880288437 6.22340450787664 0.575353950284691
16.8081039041281 8.0851067110876 0.655788750333248
16.8283275198191 7.34042582980322 0.624858542617019
16.8485511355102 6.43617047395789 0.585106406723445
16.8687747512013 7.39361732132353 0.62711843622367
16.8889983668923 7.60638328740478 0.636077724914372
16.9092219825834 7.50000030436416 0.631613966431975
16.9294455982745 5.53191511811257 0.542448906438364
16.9496692139655 7.23404284676259 0.620314056540036
16.9698928296566 7.55319179588447 0.633849775074574
16.9901164453477 7.2872343382829 0.622590446048853
17.0103400610387 7.44680881284384 0.629370215232479
17.0305636767298 5.95744705027507 0.562925833709398
17.0507872924209 7.12765986372196 0.615736030455294
17.0710109081119 6.22340450787664 0.575353950284691
17.091234523803 8.13829820260791 0.657942413767192
17.1114581394941 8.40425566020948 0.668606680855476
17.1316817551851 7.97872372804697 0.651460064411727
17.1519053708762 6.22340450787664 0.575353950284691
17.1721289865673 7.6595747789251 0.638297898243758
17.1923526022583 6.91489389764071 0.606476314558303
17.2125762179494 7.12765986372196 0.615736030455294
17.2327998336405 8.45744715172979 0.670719187480671
17.2530234493315 6.91489389764071 0.606476314558303
17.2732470650226 7.2872343382829 0.622590446048853
17.2934706807137 7.76595776196572 0.64271523744401
17.3136942964047 7.18085135524228 0.618029282454318
17.3339179120958 6.70212793155946 0.59707301148151
17.3541415277869 7.34042582980322 0.624858542617019
17.3743651434779 8.03191521956729 0.653627990751228
17.394588759169 6.22340450787664 0.575353950284691
17.41481237486 8.19148969412823 0.660089050510576
17.4350359905511 6.54255345699852 0.5899221785364
17.4552596062422 7.07446837220165 0.613434205461912
17.4754832219332 8.35106416868917 0.666487478437833
17.4957068376243 6.59574494851883 0.59231538178515
17.5159304533154 8.19148969412823 0.660089050510576
17.5361540690064 6.17021301635633 0.572889896348368
17.5563776846975 7.76595776196572 0.64271523744401
17.5766013003886 7.87234074500635 0.647102423100873
17.5968249160796 8.13829820260791 0.657942413767192
17.6170485317707 6.48936196547821 0.587519226884514
17.6372721474618 9.14893654149386 0.697599871320769
17.6574957631528 8.77659610085167 0.683257079784517
17.6777193788439 7.2872343382829 0.622590446048853
17.697942994535 6.64893644003915 0.594698954320119
17.718166610226 8.24468118564854 0.662228728895168
17.7383902259171 6.91489389764071 0.606476314558303
17.7586138416082 7.60638328740478 0.636077724914372
17.7788374572992 8.40425566020948 0.668606680855476
17.7990610729903 7.18085135524228 0.618029282454318
17.8192846886814 7.97872372804697 0.651460064411727
17.8395083043724 7.2872343382829 0.622590446048853
17.8597319200635 7.71276627044541 0.640510375928879
17.8799555357546 7.6595747789251 0.638297898243758
17.9001791514456 8.29787267716885 0.664361516152362
17.9204027671367 7.18085135524228 0.618029282454318
17.9406263828278 7.55319179588447 0.633849775074574
17.9608499985188 5.79787257571413 0.555335475138186
17.9810736142099 6.22340450787664 0.575353950284691
18.001297229901 7.39361732132353 0.62711843622367
18.021520845592 8.40425566020948 0.668606680855476
18.0417444612831 7.6595747789251 0.638297898243758
18.0619680769742 6.80851091460008 0.601793029687043
18.0821916926652 6.75531942307977 0.599437666325494
18.1024153083563 7.92553223652666 0.64928489952653
18.1226389240474 6.96808538916102 0.608804447167049
18.1428625397384 7.87234074500635 0.647102423100873
18.1630861554295 7.44680881284384 0.629370215232479
18.1833097711205 7.39361732132353 0.62711843622367
18.2035333868116 7.39361732132353 0.62711843622367
18.2237570025027 5.90425555875476 0.560407137255822
18.2439806181937 7.50000030436416 0.631613966431975
18.2642042338848 6.54255345699852 0.5899221785364
18.2844278495759 8.13829820260791 0.657942413767192
18.3046514652669 7.6595747789251 0.638297898243758
18.324875080958 6.80851091460008 0.601793029687043
18.3450986966491 7.97872372804697 0.651460064411727
18.3653223123401 7.39361732132353 0.62711843622367
18.3855459280312 8.40425566020948 0.668606680855476
18.4057695437223 7.23404284676259 0.620314056540036
18.4259931594133 6.64893644003915 0.594698954320119
18.4462167751044 7.55319179588447 0.633849775074574
18.4664403907955 7.50000030436416 0.631613966431975
18.4866640064865 8.13829820260791 0.657942413767192
18.5068876221776 7.02127688068134 0.611123710602471
18.5271112378687 6.48936196547821 0.587519226884514
18.5473348535597 7.44680881284384 0.629370215232479
18.5675584692508 8.51063864325011 0.672825061382888
18.5877820849419 7.60638328740478 0.636077724914372
18.6080057006329 7.39361732132353 0.62711843622367
18.628229316324 6.32978749091727 0.580250667943183
18.6484529320151 7.34042582980322 0.624858542617019
18.6686765477061 7.60638328740478 0.636077724914372
18.6889001633972 7.55319179588447 0.633849775074574
18.7091237790883 7.81914925348604 0.64491256090486
18.7293473947793 8.45744715172979 0.670719187480671
18.7495710104704 7.50000030436416 0.631613966431975
18.7697946261615 6.96808538916102 0.608804447167049
18.7900182418525 7.76595776196572 0.64271523744401
18.8102418575436 7.23404284676259 0.620314056540036
18.8304654732347 6.8617024061204 0.604139210240542
18.8506890889257 8.0851067110876 0.655788750333248
18.8709127046168 6.48936196547821 0.587519226884514
18.8911363203079 7.71276627044541 0.640510375928879
18.9113599359989 7.44680881284384 0.629370215232479
18.93158355169 7.2872343382829 0.622590446048853
18.951807167381 6.48936196547821 0.587519226884514
18.9720307830721 7.34042582980322 0.624858542617019
18.9922543987632 7.02127688068134 0.611123710602471
19.0124780144542 9.04255355845324 0.693532198911084
19.0327016301453 7.2872343382829 0.622590446048853
19.0529252458364 6.0638300333157 0.567929717304644
19.0731488615274 7.50000030436416 0.631613966431975
19.0933724772185 7.87234074500635 0.647102423100873
19.1135960929096 6.70212793155946 0.59707301148151
19.1338197086006 7.02127688068134 0.611123710602471
19.1540433242917 7.6595747789251 0.638297898243758
19.1742669399828 5.00000020290944 0.515710644057907
19.1944905556738 7.92553223652666 0.64928489952653
19.2147141713649 6.96808538916102 0.608804447167049
19.234937787056 6.91489389764071 0.606476314558303
19.255161402747 6.01063854179539 0.565433310857768
19.2753850184381 6.22340450787664 0.575353950284691
19.2956086341292 6.0638300333157 0.567929717304644
19.3158322498202 7.71276627044541 0.640510375928879
19.3360558655113 6.70212793155946 0.59707301148151
19.3562794812024 6.80851091460008 0.601793029687043
19.3765030968934 7.60638328740478 0.636077724914372
19.3967267125845 7.23404284676259 0.620314056540036
19.4169503282756 7.02127688068134 0.611123710602471
19.4371739439666 7.92553223652666 0.64928489952653
19.4573975596577 7.44680881284384 0.629370215232479
19.4776211753488 7.60638328740478 0.636077724914372
19.4978447910398 7.23404284676259 0.620314056540036
19.5180684067309 7.23404284676259 0.620314056540036
19.538292022422 6.64893644003915 0.594698954320119
19.558515638113 6.54255345699852 0.5899221785364
19.5787392538041 7.6595747789251 0.638297898243758
19.5989628694952 7.76595776196572 0.64271523744401
19.6191864851862 7.02127688068134 0.611123710602471
19.6394101008773 6.8617024061204 0.604139210240542
19.6596337165684 7.44680881284384 0.629370215232479
19.6798573322594 7.44680881284384 0.629370215232479
19.7000809479505 7.55319179588447 0.633849775074574
19.7203045636415 7.12765986372196 0.615736030455294
19.7405281793326 6.70212793155946 0.59707301148151
19.7607517950237 8.51063864325011 0.672825061382888
19.7809754107147 7.81914925348604 0.64491256090486
19.8011990264058 6.8617024061204 0.604139210240542
19.8214226420969 7.60638328740478 0.636077724914372
19.8416462577879 8.03191521956729 0.653627990751228
19.861869873479 7.71276627044541 0.640510375928879
19.8820934891701 7.2872343382829 0.622590446048853
19.9023171048611 7.34042582980322 0.624858542617019
19.9225407205522 6.8617024061204 0.604139210240542
19.9427643362433 8.51063864325011 0.672825061382888
19.9629879519343 6.59574494851883 0.59231538178515
19.9832115676254 7.76595776196572 0.64271523744401
20.0034351833165 7.07446837220165 0.613434205461912
20.0236587990075 7.34042582980322 0.624858542617019
20.0438824146986 7.76595776196572 0.64271523744401
20.0641060303897 6.17021301635633 0.572889896348368
20.0843296460807 5.58510660963288 0.545050594776606
20.1045532617718 8.24468118564854 0.662228728895168
20.1247768774629 8.19148969412823 0.660089050510576
20.1450004931539 7.60638328740478 0.636077724914372
20.165224108845 8.19148969412823 0.660089050510576
20.1854477245361 6.70212793155946 0.59707301148151
20.2056713402271 6.0638300333157 0.567929717304644
20.2258949559182 7.50000030436416 0.631613966431975
20.2461185716093 7.12765986372196 0.615736030455294
20.2663421873003 7.71276627044541 0.640510375928879
20.2865658029914 7.2872343382829 0.622590446048853
20.3067894186825 6.64893644003915 0.594698954320119
20.3270130343735 7.6595747789251 0.638297898243758
20.3472366500646 6.8617024061204 0.604139210240542
20.3674602657557 7.23404284676259 0.620314056540036
20.3876838814467 6.91489389764071 0.606476314558303
20.4079074971378 7.39361732132353 0.62711843622367
20.4281311128289 7.34042582980322 0.624858542617019
20.4483547285199 6.17021301635633 0.572889896348368
20.468578344211 7.2872343382829 0.622590446048853
20.488801959902 6.27659599939695 0.5778074963847
20.5090255755931 7.81914925348604 0.64491256090486
20.5292491912842 9.09574504997355 0.695569008579737
20.5494728069752 6.32978749091727 0.580250667943183
20.5696964226663 7.44680881284384 0.629370215232479
20.5899200383574 7.6595747789251 0.638297898243758
20.6101436540484 8.45744715172979 0.670719187480671
20.6303672697395 7.50000030436416 0.631613966431975
20.6505908854306 6.96808538916102 0.608804447167049
20.6708145011216 7.18085135524228 0.618029282454318
20.6910381168127 7.2872343382829 0.622590446048853
20.7112617325038 7.92553223652666 0.64928489952653
20.7314853481948 7.50000030436416 0.631613966431975
20.7517089638859 7.6595747789251 0.638297898243758
20.771932579577 6.91489389764071 0.606476314558303
20.792156195268 7.60638328740478 0.636077724914372
20.8123798109591 8.13829820260791 0.657942413767192
20.8326034266502 7.2872343382829 0.622590446048853
20.8528270423412 7.81914925348604 0.64491256090486
20.8730506580323 7.87234074500635 0.647102423100873
20.8932742737234 6.91489389764071 0.606476314558303
20.9134978894144 7.18085135524228 0.618029282454318
20.9337215051055 7.6595747789251 0.638297898243758
20.9539451207966 6.38297898243758 0.582683595460406
20.9741687364876 8.77659610085167 0.683257079784517
20.9943923521787 8.35106416868917 0.666487478437833
21.0146159678698 9.57446847365637 0.713638745184143
21.0348395835608 7.71276627044541 0.640510375928879
21.0550631992519 8.29787267716885 0.664361516152362
21.075286814943 8.8829790838923 0.687385558923066
21.095510430634 8.29787267716885 0.664361516152362
21.1157340463251 7.97872372804697 0.651460064411727
21.1359576620162 9.09574504997355 0.695569008579737
21.1561812777072 6.59574494851883 0.59231538178515
21.1764048933983 8.0851067110876 0.655788750333248
21.1966285090894 8.40425566020948 0.668606680855476
21.2168521247804 8.0851067110876 0.655788750333248
21.2370757404715 7.81914925348604 0.64491256090486
21.2572993561625 8.67021311781104 0.679103502814817
21.2775229718536 8.35106416868917 0.666487478437833
21.2977465875447 10.0531918973392 0.73126210865831
21.3179702032357 9.20212803301418 0.699624838922197
21.3381938189268 7.44680881284384 0.629370215232479
21.3584174346179 7.50000030436416 0.631613966431975
21.3786410503089 8.56383013477042 0.674924364647657
21.398864666 7.71276627044541 0.640510375928879
21.4190882816911 8.0851067110876 0.655788750333248
21.4393118973821 8.45744715172979 0.670719187480671
21.4595355130732 8.61702162629073 0.677017158397923
21.4797591287643 10.1063833888595 0.73319411231239
21.4999827444553 8.40425566020948 0.668606680855476
21.5202063601464 9.3085110160548 0.703657292136748
21.5404299758375 8.19148969412823 0.660089050510576
21.5606535915285 8.8829790838923 0.687385558923066
21.5808772072196 7.92553223652666 0.64928489952653
21.6011008229107 8.13829820260791 0.657942413767192
21.6213244386017 7.55319179588447 0.633849775074574
21.6415480542928 7.02127688068134 0.611123710602471
21.6617716699839 7.6595747789251 0.638297898243758
21.6819952856749 7.97872372804697 0.651460064411727
21.702218901366 7.50000030436416 0.631613966431975
21.7224425170571 7.81914925348604 0.64491256090486
21.7426661327481 7.23404284676259 0.620314056540036
21.7628897484392 6.38297898243758 0.582683595460406
21.7831133641303 7.12765986372196 0.615736030455294
21.8033369798213 6.43617047395789 0.585106406723445
21.8235605955124 7.71276627044541 0.640510375928879
21.8437842112035 6.80851091460008 0.601793029687043
21.8640078268945 7.44680881284384 0.629370215232479
21.8842314425856 7.2872343382829 0.622590446048853
21.9044550582767 6.64893644003915 0.594698954320119
21.9246786739677 7.50000030436416 0.631613966431975
21.9449022896588 7.44680881284384 0.629370215232479
21.9651259053499 7.23404284676259 0.620314056540036
21.9853495210409 6.80851091460008 0.601793029687043
22.005573136732 7.39361732132353 0.62711843622367
22.025796752423 7.87234074500635 0.647102423100873
22.0460203681141 7.50000030436416 0.631613966431975
22.0662439838052 7.50000030436416 0.631613966431975
22.0864675994962 7.39361732132353 0.62711843622367
22.1066912151873 7.50000030436416 0.631613966431975
22.1269148308784 6.32978749091727 0.580250667943183
22.1471384465694 7.12765986372196 0.615736030455294
22.1673620622605 7.97872372804697 0.651460064411727
22.1875856779516 7.18085135524228 0.618029282454318
22.2078092936426 8.24468118564854 0.662228728895168
22.2280329093337 6.64893644003915 0.594698954320119
22.2482565250248 7.50000030436416 0.631613966431975
22.2684801407158 6.48936196547821 0.587519226884514
22.2887037564069 7.50000030436416 0.631613966431975
22.308927372098 7.87234074500635 0.647102423100873
22.329150987789 7.07446837220165 0.613434205461912
22.3493746034801 6.70212793155946 0.59707301148151
22.3695982191712 6.75531942307977 0.599437666325494
22.3898218348622 6.54255345699852 0.5899221785364
22.4100454505533 6.32978749091727 0.580250667943183
22.4302690662444 7.76595776196572 0.64271523744401
22.4504926819354 7.2872343382829 0.622590446048853
22.4707162976265 6.59574494851883 0.59231538178515
22.4909399133176 7.2872343382829 0.622590446048853
22.5111635290086 6.59574494851883 0.59231538178515
22.5313871446997 6.75531942307977 0.599437666325494
22.5516107603908 7.34042582980322 0.624858542617019
22.5718343760818 6.8617024061204 0.604139210240542
22.5920579917729 6.75531942307977 0.599437666325494
22.612281607464 6.59574494851883 0.59231538178515
22.632505223155 7.02127688068134 0.611123710602471
22.6527288388461 6.32978749091727 0.580250667943183
22.6729524545372 6.8617024061204 0.604139210240542
22.6931760702282 6.22340450787664 0.575353950284691
22.7133996859193 6.75531942307977 0.599437666325494
22.7336233016104 6.70212793155946 0.59707301148151
22.7538469173014 6.64893644003915 0.594698954320119
22.7740705329925 6.96808538916102 0.608804447167049
22.7942941486835 7.50000030436416 0.631613966431975
22.8145177643746 6.64893644003915 0.594698954320119
22.8347413800657 6.32978749091727 0.580250667943183
22.8549649957567 5.37234064355163 0.534567873881054
22.8751886114478 6.8617024061204 0.604139210240542
22.8954122271389 6.22340450787664 0.575353950284691
22.9156358428299 6.54255345699852 0.5899221785364
22.935859458521 7.34042582980322 0.624858542617019
22.9560830742121 7.2872343382829 0.622590446048853
22.9763066899031 7.60638328740478 0.636077724914372
22.9965303055942 6.0638300333157 0.567929717304644
23.0167539212853 6.11702152483601 0.570415198401908
23.0369775369763 7.50000030436416 0.631613966431975
23.0572011526674 6.91489389764071 0.606476314558303
23.0774247683585 6.48936196547821 0.587519226884514
23.0976483840495 6.43617047395789 0.585106406723445
23.1178719997406 7.6595747789251 0.638297898243758
23.1380956154317 7.23404284676259 0.620314056540036
23.1583192311227 7.2872343382829 0.622590446048853
23.1785428468138 7.18085135524228 0.618029282454318
23.1987664625049 7.07446837220165 0.613434205461912
23.2189900781959 5.69148959267351 0.550217066626112
23.239213693887 6.0638300333157 0.567929717304644
23.2594373095781 7.2872343382829 0.622590446048853
23.2796609252691 7.6595747789251 0.638297898243758
23.2998845409602 7.39361732132353 0.62711843622367
23.3201081566513 6.27659599939695 0.5778074963847
23.3403317723423 7.2872343382829 0.622590446048853
23.3605553880334 6.70212793155946 0.59707301148151
23.3807790037245 6.64893644003915 0.594698954320119
23.4010026194155 6.43617047395789 0.585106406723445
23.4212262351066 7.23404284676259 0.620314056540036
23.4414498507977 6.64893644003915 0.594698954320119
23.4616734664887 6.70212793155946 0.59707301148151
23.4818970821798 6.27659599939695 0.5778074963847
23.5021206978709 6.01063854179539 0.565433310857768
23.5223443135619 7.6595747789251 0.638297898243758
23.542567929253 5.90425555875476 0.560407137255822
23.562791544944 5.85106406723445 0.55787706953872
23.5830151606351 6.38297898243758 0.582683595460406
23.6032387763262 7.12765986372196 0.615736030455294
23.6234623920172 6.91489389764071 0.606476314558303
23.6436860077083 6.17021301635633 0.572889896348368
23.6639096233994 5.79787257571413 0.555335475138186
23.6841332390904 5.79787257571413 0.555335475138186
23.7043568547815 6.64893644003915 0.594698954320119
23.7245804704726 7.34042582980322 0.624858542617019
23.7448040861636 7.2872343382829 0.622590446048853
23.7650277018547 5.53191511811257 0.542448906438364
23.7852513175458 5.95744705027507 0.562925833709398
23.8054749332368 7.18085135524228 0.618029282454318
23.8256985489279 6.8617024061204 0.604139210240542
23.845922164619 6.27659599939695 0.5778074963847
23.86614578031 7.07446837220165 0.613434205461912
23.8863693960011 6.32978749091727 0.580250667943183
23.9065930116922 6.48936196547821 0.587519226884514
23.9268166273832 6.70212793155946 0.59707301148151
23.9470402430743 6.22340450787664 0.575353950284691
23.9672638587654 5.69148959267351 0.550217066626112
23.9874874744564 6.59574494851883 0.59231538178515
24.0077110901475 6.96808538916102 0.608804447167049
24.0279347058386 7.12765986372196 0.615736030455294
24.0481583215296 6.0638300333157 0.567929717304644
24.0683819372207 7.81914925348604 0.64491256090486
24.0886055529118 7.50000030436416 0.631613966431975
24.1088291686028 7.07446837220165 0.613434205461912
24.1290527842939 6.91489389764071 0.606476314558303
24.149276399985 8.13829820260791 0.657942413767192
24.169500015676 5.95744705027507 0.562925833709398
24.1897236313671 6.70212793155946 0.59707301148151
24.2099472470582 6.91489389764071 0.606476314558303
24.2301708627492 6.64893644003915 0.594698954320119
24.2503944784403 6.01063854179539 0.565433310857768
24.2706180941314 7.12765986372196 0.615736030455294
24.2908417098224 7.71276627044541 0.640510375928879
24.3110653255135 7.12765986372196 0.615736030455294
24.3312889412045 6.22340450787664 0.575353950284691
24.3515125568956 7.23404284676259 0.620314056540036
24.3717361725867 6.48936196547821 0.587519226884514
24.3919597882777 6.01063854179539 0.565433310857768
24.4121834039688 6.54255345699852 0.5899221785364
24.4324070196599 6.64893644003915 0.594698954320119
24.4526306353509 6.48936196547821 0.587519226884514
24.472854251042 5.85106406723445 0.55787706953872
24.4930778667331 6.32978749091727 0.580250667943183
24.5133014824241 6.80851091460008 0.601793029687043
24.5335250981152 6.59574494851883 0.59231538178515
24.5537487138063 6.27659599939695 0.5778074963847
24.5739723294973 6.38297898243758 0.582683595460406
24.5941959451884 7.12765986372196 0.615736030455294
24.6144195608795 6.8617024061204 0.604139210240542
24.6346431765705 6.0638300333157 0.567929717304644
24.6548667922616 6.80851091460008 0.601793029687043
24.6750904079527 7.07446837220165 0.613434205461912
24.6953140236437 7.12765986372196 0.615736030455294
24.7155376393348 7.76595776196572 0.64271523744401
24.7357612550259 7.44680881284384 0.629370215232479
24.7559848707169 6.59574494851883 0.59231538178515
24.776208486408 6.27659599939695 0.5778074963847
24.7964321020991 6.38297898243758 0.582683595460406
24.8166557177901 6.54255345699852 0.5899221785364
24.8368793334812 7.07446837220165 0.613434205461912
24.8571029491723 5.69148959267351 0.550217066626112
24.8773265648633 5.37234064355163 0.534567873881054
24.8975501805544 6.8617024061204 0.604139210240542
24.9177737962455 6.27659599939695 0.5778074963847
24.9379974119365 7.34042582980322 0.624858542617019
24.9582210276276 6.75531942307977 0.599437666325494
24.9784446433187 6.64893644003915 0.594698954320119
24.9986682590097 6.64893644003915 0.594698954320119
25.0188918747008 6.17021301635633 0.572889896348368
25.0391154903919 6.70212793155946 0.59707301148151
25.0593391060829 7.02127688068134 0.611123710602471
25.079562721774 6.80851091460008 0.601793029687043
25.099786337465 5.90425555875476 0.560407137255822
25.1200099531561 6.11702152483601 0.570415198401908
25.1402335688472 7.18085135524228 0.618029282454318
25.1604571845382 6.38297898243758 0.582683595460406
25.1806808002293 7.71276627044541 0.640510375928879
25.2009044159204 6.43617047395789 0.585106406723445
25.2211280316114 6.54255345699852 0.5899221785364
25.2413516473025 6.59574494851883 0.59231538178515
25.2615752629936 6.27659599939695 0.5778074963847
25.2817988786846 6.70212793155946 0.59707301148151
25.3020224943757 6.43617047395789 0.585106406723445
25.3222461100668 6.91489389764071 0.606476314558303
25.3424697257578 6.43617047395789 0.585106406723445
25.3626933414489 6.43617047395789 0.585106406723445
25.38291695714 7.2872343382829 0.622590446048853
25.403140572831 6.11702152483601 0.570415198401908
25.4233641885221 7.34042582980322 0.624858542617019
25.4435878042132 6.22340450787664 0.575353950284691
25.4638114199042 7.55319179588447 0.633849775074574
25.4840350355953 6.54255345699852 0.5899221785364
25.5042586512864 5.79787257571413 0.555335475138186
25.5244822669774 7.92553223652666 0.64928489952653
25.5447058826685 5.47872362659226 0.539834679625181
25.5649294983596 6.48936196547821 0.587519226884514
25.5851531140506 5.85106406723445 0.55787706953872
25.6053767297417 5.90425555875476 0.560407137255822
25.6256003454328 5.85106406723445 0.55787706953872
25.6458239611238 6.01063854179539 0.565433310857768
25.6660475768149 5.95744705027507 0.562925833709398
25.686271192506 6.91489389764071 0.606476314558303
25.706494808197 6.38297898243758 0.582683595460406
25.7267184238881 6.91489389764071 0.606476314558303
25.7469420395792 6.11702152483601 0.570415198401908
25.7671656552702 6.38297898243758 0.582683595460406
25.7873892709613 6.59574494851883 0.59231538178515
25.8076128866524 7.18085135524228 0.618029282454318
25.8278365023434 6.80851091460008 0.601793029687043
25.8480601180345 6.91489389764071 0.606476314558303
25.8682837337255 6.75531942307977 0.599437666325494
25.8885073494166 6.70212793155946 0.59707301148151
25.9087309651077 6.75531942307977 0.599437666325494
25.9289545807987 5.95744705027507 0.562925833709398
25.9491781964898 6.22340450787664 0.575353950284691
25.9694018121809 6.38297898243758 0.582683595460406
25.9896254278719 6.11702152483601 0.570415198401908
26.009849043563 6.8617024061204 0.604139210240542
26.0300726592541 6.01063854179539 0.565433310857768
26.0502962749451 6.43617047395789 0.585106406723445
26.0705198906362 6.22340450787664 0.575353950284691
26.0907435063273 7.81914925348604 0.64491256090486
26.1109671220183 5.69148959267351 0.550217066626112
26.1311907377094 6.32978749091727 0.580250667943183
26.1514143534005 6.32978749091727 0.580250667943183
26.1716379690915 5.6382981011532 0.547639923340591
26.1918615847826 6.91489389764071 0.606476314558303
26.2120852004737 6.8617024061204 0.604139210240542
26.2323088161647 5.85106406723445 0.55787706953872
26.2525324318558 5.90425555875476 0.560407137255822
26.2727560475469 6.70212793155946 0.59707301148151
26.2929796632379 7.23404284676259 0.620314056540036
26.313203278929 6.48936196547821 0.587519226884514
26.3334268946201 5.58510660963288 0.545050594776606
26.3536505103111 7.02127688068134 0.611123710602471
26.3738741260022 6.32978749091727 0.580250667943183
26.3940977416933 6.48936196547821 0.587519226884514
26.4143213573843 6.59574494851883 0.59231538178515
26.4345449730754 6.80851091460008 0.601793029687043
26.4547685887665 6.43617047395789 0.585106406723445
26.4749922044575 6.48936196547821 0.587519226884514
26.4952158201486 6.80851091460008 0.601793029687043
26.5154394358397 4.89361721986881 0.510194863610278
26.5356630515307 6.70212793155946 0.59707301148151
26.5558866672218 6.0638300333157 0.567929717304644
26.5761102829129 6.17021301635633 0.572889896348368
26.5963338986039 7.12765986372196 0.615736030455294
26.616557514295 7.02127688068134 0.611123710602471
26.636781129986 6.11702152483601 0.570415198401908
26.6570047456771 7.6595747789251 0.638297898243758
26.6772283613682 7.12765986372196 0.615736030455294
26.6974519770592 7.92553223652666 0.64928489952653
26.7176755927503 5.85106406723445 0.55787706953872
26.7378992084414 6.75531942307977 0.599437666325494
26.7581228241324 5.90425555875476 0.560407137255822
26.7783464398235 6.8617024061204 0.604139210240542
26.7985700555146 5.69148959267351 0.550217066626112
26.8187936712056 7.18085135524228 0.618029282454318
26.8390172868967 6.48936196547821 0.587519226884514
26.8592409025878 7.18085135524228 0.618029282454318
26.8794645182788 6.59574494851883 0.59231538178515
26.8996881339699 6.8617024061204 0.604139210240542
26.919911749661 7.44680881284384 0.629370215232479
26.940135365352 5.6382981011532 0.547639923340591
26.9603589810431 6.32978749091727 0.580250667943183
26.9805825967342 5.42553213507194 0.537207731288247
27.0008062124252 6.70212793155946 0.59707301148151
27.0210298281163 7.34042582980322 0.624858542617019
27.0412534438074 5.21276616899069 0.526568900976162
27.0614770594984 6.96808538916102 0.608804447167049
27.0817006751895 7.23404284676259 0.620314056540036
27.1019242908806 6.0638300333157 0.567929717304644
27.1221479065716 5.265957660511 0.529248658236749
27.1423715222627 5.47872362659226 0.539834679625181
27.1625951379538 6.70212793155946 0.59707301148151
27.1828187536448 6.75531942307977 0.599437666325494
27.2030423693359 5.6382981011532 0.547639923340591
27.223265985027 5.74468108419382 0.552782195061309
27.243489600718 7.2872343382829 0.622590446048853
27.2637132164091 6.0638300333157 0.567929717304644
27.2839368321002 6.0638300333157 0.567929717304644
27.3041604477912 6.75531942307977 0.599437666325494
27.3243840634823 6.48936196547821 0.587519226884514
27.3446076791734 5.53191511811257 0.542448906438364
27.3648312948644 7.2872343382829 0.622590446048853
27.3850549105555 5.95744705027507 0.562925833709398
27.4052785262465 6.17021301635633 0.572889896348368
27.4255021419376 5.79787257571413 0.555335475138186
27.4457257576287 7.18085135524228 0.618029282454318
27.4659493733197 6.01063854179539 0.565433310857768
27.4861729890108 5.53191511811257 0.542448906438364
27.5063966047019 6.64893644003915 0.594698954320119
27.5266202203929 7.23404284676259 0.620314056540036
27.546843836084 6.70212793155946 0.59707301148151
27.5670674517751 6.32978749091727 0.580250667943183
27.5872910674661 5.69148959267351 0.550217066626112
27.6075146831572 7.71276627044541 0.640510375928879
27.6277382988483 5.47872362659226 0.539834679625181
27.6479619145393 7.39361732132353 0.62711843622367
27.6681855302304 6.43617047395789 0.585106406723445
27.6884091459215 6.01063854179539 0.565433310857768
27.7086327616125 6.75531942307977 0.599437666325494
27.7288563773036 5.6382981011532 0.547639923340591
27.7490799929947 7.50000030436416 0.631613966431975
27.7693036086857 7.39361732132353 0.62711843622367
27.7895272243768 6.27659599939695 0.5778074963847
27.8097508400679 6.8617024061204 0.604139210240542
27.8299744557589 7.07446837220165 0.613434205461912
27.85019807145 6.38297898243758 0.582683595460406
27.8704216871411 6.43617047395789 0.585106406723445
27.8906453028321 6.11702152483601 0.570415198401908
27.9108689185232 5.74468108419382 0.552782195061309
27.9310925342143 7.55319179588447 0.633849775074574
27.9513161499053 6.17021301635633 0.572889896348368
27.9715397655964 6.01063854179539 0.565433310857768
27.9917633812875 6.59574494851883 0.59231538178515
28.0119869969785 6.32978749091727 0.580250667943183
28.0322106126696 6.38297898243758 0.582683595460406
28.0524342283607 6.0638300333157 0.567929717304644
28.0726578440517 6.32978749091727 0.580250667943183
28.0928814597428 6.75531942307977 0.599437666325494
28.1131050754339 5.95744705027507 0.562925833709398
28.1333286911249 5.6382981011532 0.547639923340591
28.153552306816 5.69148959267351 0.550217066626112
28.173775922507 6.91489389764071 0.606476314558303
28.1939995381981 5.79787257571413 0.555335475138186
28.2142231538892 6.22340450787664 0.575353950284691
28.2344467695802 7.34042582980322 0.624858542617019
28.2546703852713 6.17021301635633 0.572889896348368
28.2748940009624 6.80851091460008 0.601793029687043
28.2951176166534 5.265957660511 0.529248658236749
28.3153412323445 6.0638300333157 0.567929717304644
28.3355648480356 6.80851091460008 0.601793029687043
28.3557884637266 7.92553223652666 0.64928489952653
28.3760120794177 7.07446837220165 0.613434205461912
28.3962356951088 5.00000020290944 0.515710644057907
28.4164593107998 6.8617024061204 0.604139210240542
28.4366829264909 5.79787257571413 0.555335475138186
28.456906542182 5.74468108419382 0.552782195061309
28.477130157873 5.79787257571413 0.555335475138186
28.4973537735641 5.79787257571413 0.555335475138186
28.5175773892552 6.91489389764071 0.606476314558303
28.5378010049462 6.0638300333157 0.567929717304644
28.5580246206373 6.43617047395789 0.585106406723445
28.5782482363284 6.75531942307977 0.599437666325494
28.5984718520194 7.23404284676259 0.620314056540036
28.6186954677105 7.02127688068134 0.611123710602471
28.6389190834016 6.91489389764071 0.606476314558303
28.6591426990926 5.42553213507194 0.537207731288247
28.6793663147837 6.11702152483601 0.570415198401908
28.6995899304748 6.70212793155946 0.59707301148151
28.7198135461658 6.01063854179539 0.565433310857768
28.7400371618569 6.32978749091727 0.580250667943183
28.760260777548 5.6382981011532 0.547639923340591
28.780484393239 5.95744705027507 0.562925833709398
28.8007080089301 5.79787257571413 0.555335475138186
28.8209316246212 6.22340450787664 0.575353950284691
28.8411552403122 6.80851091460008 0.601793029687043
28.8613788560033 6.91489389764071 0.606476314558303
28.8816024716944 6.32978749091727 0.580250667943183
28.9018260873854 6.70212793155946 0.59707301148151
28.9220497030765 5.37234064355163 0.534567873881054
28.9422733187675 5.31914915203132 0.531914915203132
28.9624969344586 5.31914915203132 0.531914915203132
28.9827205501497 6.43617047395789 0.585106406723445
29.0029441658407 6.0638300333157 0.567929717304644
29.0231677815318 5.6382981011532 0.547639923340591
29.0433913972229 5.58510660963288 0.545050594776606
29.0636150129139 6.48936196547821 0.587519226884514
29.083838628605 6.43617047395789 0.585106406723445
29.1040622442961 6.27659599939695 0.5778074963847
29.1242858599871 5.37234064355163 0.534567873881054
29.1445094756782 5.53191511811257 0.542448906438364
29.1647330913693 6.70212793155946 0.59707301148151
29.1849567070603 5.6382981011532 0.547639923340591
29.2051803227514 6.27659599939695 0.5778074963847
29.2254039384425 6.11702152483601 0.570415198401908
29.2456275541335 6.0638300333157 0.567929717304644
29.2658511698246 6.80851091460008 0.601793029687043
29.2860747855157 6.48936196547821 0.587519226884514
29.3062984012067 6.22340450787664 0.575353950284691
29.3265220168978 5.74468108419382 0.552782195061309
29.3467456325889 5.95744705027507 0.562925833709398
29.3669692482799 5.58510660963288 0.545050594776606
29.387192863971 5.74468108419382 0.552782195061309
29.4074164796621 5.10638318595006 0.521168051529382
29.4276400953531 6.27659599939695 0.5778074963847
29.4478637110442 6.64893644003915 0.594698954320119
29.4680873267353 5.42553213507194 0.537207731288247
29.4883109424263 5.90425555875476 0.560407137255822
29.5085345581174 6.32978749091727 0.580250667943183
29.5287581738085 6.64893644003915 0.594698954320119
29.5489817894995 6.32978749091727 0.580250667943183
29.5692054051906 6.22340450787664 0.575353950284691
29.5894290208817 6.75531942307977 0.599437666325494
29.6096526365727 6.22340450787664 0.575353950284691
29.6298762522638 6.8617024061204 0.604139210240542
29.6500998679549 7.55319179588447 0.633849775074574
29.6703234836459 6.70212793155946 0.59707301148151
29.690547099337 6.80851091460008 0.601793029687043
29.710770715028 5.53191511811257 0.542448906438364
29.7309943307191 6.59574494851883 0.59231538178515
29.7512179464102 6.48936196547821 0.587519226884514
29.7714415621012 6.91489389764071 0.606476314558303
29.7916651777923 5.74468108419382 0.552782195061309
29.8118887934834 6.54255345699852 0.5899221785364
29.8321124091744 7.12765986372196 0.615736030455294
29.8523360248655 7.18085135524228 0.618029282454318
29.8725596405566 5.6382981011532 0.547639923340591
29.8927832562476 6.01063854179539 0.565433310857768
29.9130068719387 6.70212793155946 0.59707301148151
29.9332304876298 8.40425566020948 0.668606680855476
29.9534541033208 6.54255345699852 0.5899221785364
29.9736777190119 7.12765986372196 0.615736030455294
29.993901334703 6.70212793155946 0.59707301148151
30.014124950394 6.75531942307977 0.599437666325494
30.0343485660851 5.79787257571413 0.555335475138186
30.0545721817762 6.32978749091727 0.580250667943183
30.0747957974672 7.76595776196572 0.64271523744401
30.0950194131583 8.67021311781104 0.679103502814817
30.1152430288494 6.96808538916102 0.608804447167049
30.1354666445404 6.17021301635633 0.572889896348368
30.1556902602315 6.64893644003915 0.594698954320119
30.1759138759226 6.70212793155946 0.59707301148151
30.1961374916136 8.40425566020948 0.668606680855476
30.2163611073047 7.18085135524228 0.618029282454318
30.2365847229958 7.12765986372196 0.615736030455294
30.2568083386868 6.91489389764071 0.606476314558303
30.2770319543779 7.02127688068134 0.611123710602471
30.297255570069 6.38297898243758 0.582683595460406
30.31747918576 7.44680881284384 0.629370215232479
30.3377028014511 8.19148969412823 0.660089050510576
30.3579264171422 6.96808538916102 0.608804447167049
30.3781500328332 7.02127688068134 0.611123710602471
30.3983736485243 7.34042582980322 0.624858542617019
30.4185972642154 6.38297898243758 0.582683595460406
30.4388208799064 6.70212793155946 0.59707301148151
30.4590444955975 7.02127688068134 0.611123710602471
30.4792681112885 6.01063854179539 0.565433310857768
30.4994917269796 6.54255345699852 0.5899221785364
30.5197153426707 7.76595776196572 0.64271523744401
30.5399389583617 7.55319179588447 0.633849775074574
30.5601625740528 6.32978749091727 0.580250667943183
30.5803861897439 6.70212793155946 0.59707301148151
30.6006098054349 6.38297898243758 0.582683595460406
30.620833421126 6.38297898243758 0.582683595460406
30.6410570368171 6.11702152483601 0.570415198401908
30.6612806525081 6.43617047395789 0.585106406723445
30.6815042681992 6.01063854179539 0.565433310857768
30.7017278838903 5.00000020290944 0.515710644057907
30.7219514995813 6.59574494851883 0.59231538178515
30.7421751152724 5.53191511811257 0.542448906438364
30.7623987309635 6.43617047395789 0.585106406723445
30.7826223466545 7.23404284676259 0.620314056540036
30.8028459623456 6.01063854179539 0.565433310857768
30.8230695780367 7.39361732132353 0.62711843622367
30.8432931937277 5.90425555875476 0.560407137255822
30.8635168094188 5.74468108419382 0.552782195061309
30.8837404251099 7.60638328740478 0.636077724914372
30.9039640408009 7.02127688068134 0.611123710602471
30.924187656492 6.43617047395789 0.585106406723445
30.9444112721831 5.85106406723445 0.55787706953872
30.9646348878741 5.95744705027507 0.562925833709398
30.9848585035652 5.74468108419382 0.552782195061309
31.0050821192563 7.50000030436416 0.631613966431975
31.0253057349473 5.265957660511 0.529248658236749
31.0455293506384 5.79787257571413 0.555335475138186
31.0657529663295 5.90425555875476 0.560407137255822
31.0859765820205 6.8617024061204 0.604139210240542
31.1062001977116 6.27659599939695 0.5778074963847
31.1264238134027 6.96808538916102 0.608804447167049
31.1466474290937 6.80851091460008 0.601793029687043
31.1668710447848 6.01063854179539 0.565433310857768
31.1870946604759 6.54255345699852 0.5899221785364
31.2073182761669 7.97872372804697 0.651460064411727
31.227541891858 6.11702152483601 0.570415198401908
31.247765507549 5.42553213507194 0.537207731288247
31.2679891232401 6.75531942307977 0.599437666325494
31.2882127389312 7.07446837220165 0.613434205461912
31.3084363546222 5.85106406723445 0.55787706953872
31.3286599703133 5.95744705027507 0.562925833709398
31.3488835860044 5.21276616899069 0.526568900976162
31.3691072016954 5.21276616899069 0.526568900976162
31.3893308173865 6.27659599939695 0.5778074963847
31.4095544330776 6.38297898243758 0.582683595460406
31.4297780487686 5.53191511811257 0.542448906438364
31.4500016644597 5.58510660963288 0.545050594776606
31.4702252801508 5.58510660963288 0.545050594776606
31.4904488958418 5.37234064355163 0.534567873881054
31.5106725115329 5.85106406723445 0.55787706953872
31.530896127224 5.95744705027507 0.562925833709398
31.551119742915 5.265957660511 0.529248658236749
31.5713433586061 5.85106406723445 0.55787706953872
31.5915669742972 6.43617047395789 0.585106406723445
31.6117905899882 5.42553213507194 0.537207731288247
31.6320142056793 5.53191511811257 0.542448906438364
31.6522378213704 5.10638318595006 0.521168051529382
31.6724614370614 5.58510660963288 0.545050594776606
31.6926850527525 5.53191511811257 0.542448906438364
31.7129086684436 7.02127688068134 0.611123710602471
31.7331322841346 7.23404284676259 0.620314056540036
31.7533558998257 5.95744705027507 0.562925833709398
31.7735795155168 5.10638318595006 0.521168051529382
31.7938031312078 5.15957467747038 0.523875436249008
31.8140267468989 5.265957660511 0.529248658236749
31.83425036259 5.69148959267351 0.550217066626112
31.854473978281 5.85106406723445 0.55787706953872
31.8746975939721 6.01063854179539 0.565433310857768
31.8949212096632 5.85106406723445 0.55787706953872
31.9151448253542 4.78723423682818 0.504618796037166
31.9353684410453 5.00000020290944 0.515710644057907
31.9555920567364 5.85106406723445 0.55787706953872
31.9758156724274 5.90425555875476 0.560407137255822
31.9960392881185 5.79787257571413 0.555335475138186
32.0162629038095 5.37234064355163 0.534567873881054
32.0364865195006 5.74468108419382 0.552782195061309
32.0567101351917 6.43617047395789 0.585106406723445
32.0769337508827 5.6382981011532 0.547639923340591
32.0971573665738 5.58510660963288 0.545050594776606
32.1173809822649 5.58510660963288 0.545050594776606
32.1376045979559 6.01063854179539 0.565433310857768
32.157828213647 6.70212793155946 0.59707301148151
32.1780518293381 5.21276616899069 0.526568900976162
32.1982754450291 6.38297898243758 0.582683595460406
32.2184990607202 6.27659599939695 0.5778074963847
32.2387226764113 6.22340450787664 0.575353950284691
32.2589462921023 6.8617024061204 0.604139210240542
32.2791699077934 7.50000030436416 0.631613966431975
32.2993935234845 6.27659599939695 0.5778074963847
32.3196171391755 4.78723423682818 0.504618796037166
32.3398407548666 5.74468108419382 0.552782195061309
32.3600643705577 5.37234064355163 0.534567873881054
32.3802879862487 5.265957660511 0.529248658236749
32.4005116019398 6.43617047395789 0.585106406723445
32.4207352176309 5.42553213507194 0.537207731288247
32.4409588333219 5.31914915203132 0.531914915203132
32.461182449013 6.48936196547821 0.587519226884514
32.4814060647041 6.11702152483601 0.570415198401908
32.5016296803951 5.42553213507194 0.537207731288247
32.5218532960862 6.11702152483601 0.570415198401908
32.5420769117773 6.59574494851883 0.59231538178515
32.5623005274683 5.53191511811257 0.542448906438364
32.5825241431594 6.43617047395789 0.585106406723445
32.6027477588505 6.70212793155946 0.59707301148151
32.6229713745415 5.15957467747038 0.523875436249008
32.6431949902326 6.43617047395789 0.585106406723445
32.6634186059237 6.75531942307977 0.599437666325494
32.6836422216147 5.79787257571413 0.555335475138186
32.7038658373058 5.6382981011532 0.547639923340591
32.7240894529969 5.90425555875476 0.560407137255822
32.7443130686879 6.70212793155946 0.59707301148151
32.764536684379 6.0638300333157 0.567929717304644
32.78476030007 6.70212793155946 0.59707301148151
32.8049839157611 6.11702152483601 0.570415198401908
32.8252075314522 5.31914915203132 0.531914915203132
32.8454311471432 6.17021301635633 0.572889896348368
32.8656547628343 6.64893644003915 0.594698954320119
32.8858783785254 6.01063854179539 0.565433310857768
32.9061019942164 6.22340450787664 0.575353950284691
32.9263256099075 6.43617047395789 0.585106406723445
32.9465492255986 6.01063854179539 0.565433310857768
32.9667728412896 6.43617047395789 0.585106406723445
32.9869964569807 6.43617047395789 0.585106406723445
33.0072200726718 6.43617047395789 0.585106406723445
33.0274436883628 6.11702152483601 0.570415198401908
33.0476673040539 5.53191511811257 0.542448906438364
33.067890919745 6.22340450787664 0.575353950284691
33.088114535436 5.31914915203132 0.531914915203132
33.1083381511271 6.70212793155946 0.59707301148151
33.1285617668182 5.53191511811257 0.542448906438364
33.1487853825092 5.69148959267351 0.550217066626112
33.1690089982003 7.44680881284384 0.629370215232479
33.1892326138914 6.64893644003915 0.594698954320119
33.2094562295824 5.90425555875476 0.560407137255822
33.2296798452735 6.64893644003915 0.594698954320119
33.2499034609646 6.22340450787664 0.575353950284691
33.2701270766556 6.80851091460008 0.601793029687043
33.2903506923467 6.75531942307977 0.599437666325494
33.3105743080378 6.70212793155946 0.59707301148151
33.3307979237288 6.43617047395789 0.585106406723445
33.3510215394199 5.90425555875476 0.560407137255822
33.371245155111 5.21276616899069 0.526568900976162
33.391468770802 6.59574494851883 0.59231538178515
33.4116923864931 6.59574494851883 0.59231538178515
33.4319160021842 6.38297898243758 0.582683595460406
33.4521396178752 6.48936196547821 0.587519226884514
33.4723632335663 7.18085135524228 0.618029282454318
33.4925868492574 6.38297898243758 0.582683595460406
33.5128104649484 6.01063854179539 0.565433310857768
33.5330340806395 5.69148959267351 0.550217066626112
33.5532576963305 6.80851091460008 0.601793029687043
33.5734813120216 5.79787257571413 0.555335475138186
33.5937049277127 6.64893644003915 0.594698954320119
33.6139285434037 7.02127688068134 0.611123710602471
33.6341521590948 5.58510660963288 0.545050594776606
33.6543757747859 6.59574494851883 0.59231538178515
33.6745993904769 6.11702152483601 0.570415198401908
33.694823006168 6.43617047395789 0.585106406723445
33.7150466218591 5.85106406723445 0.55787706953872
33.7352702375501 5.90425555875476 0.560407137255822
33.7554938532412 6.11702152483601 0.570415198401908
33.7757174689323 7.18085135524228 0.618029282454318
33.7959410846233 6.27659599939695 0.5778074963847
33.8161647003144 6.59574494851883 0.59231538178515
33.8363883160055 5.90425555875476 0.560407137255822
33.8566119316965 6.11702152483601 0.570415198401908
33.8768355473876 6.54255345699852 0.5899221785364
33.8970591630787 5.05319169442975 0.518446528742142
33.9172827787697 6.11702152483601 0.570415198401908
33.9375063944608 5.74468108419382 0.552782195061309
33.9577300101519 5.90425555875476 0.560407137255822
33.9779536258429 5.31914915203132 0.531914915203132
33.998177241534 5.95744705027507 0.562925833709398
34.0184008572251 6.38297898243758 0.582683595460406
34.0386244729161 5.79787257571413 0.555335475138186
34.0588480886072 4.94680871138912 0.512960167678218
34.0790717042983 5.74468108419382 0.552782195061309
34.0992953199893 6.8617024061204 0.604139210240542
34.1195189356804 5.69148959267351 0.550217066626112
34.1397425513715 6.27659599939695 0.5778074963847
34.1599661670625 5.95744705027507 0.562925833709398
34.1801897827536 5.21276616899069 0.526568900976162
34.2004133984447 6.91489389764071 0.606476314558303
34.2206370141357 6.22340450787664 0.575353950284691
34.2408606298268 6.8617024061204 0.604139210240542
34.2610842455179 7.2872343382829 0.622590446048853
34.2813078612089 6.0638300333157 0.567929717304644
34.3015314769 6.8617024061204 0.604139210240542
34.321755092591 5.42553213507194 0.537207731288247
34.3419787082821 5.15957467747038 0.523875436249008
34.3622023239732 5.10638318595006 0.521168051529382
34.3824259396642 7.02127688068134 0.611123710602471
34.4026495553553 5.85106406723445 0.55787706953872
34.4228731710464 7.12765986372196 0.615736030455294
34.4430967867374 5.31914915203132 0.531914915203132
34.4633204024285 6.01063854179539 0.565433310857768
34.4835440181196 6.59574494851883 0.59231538178515
34.5037676338106 6.32978749091727 0.580250667943183
34.5239912495017 6.54255345699852 0.5899221785364
34.5442148651928 6.54255345699852 0.5899221785364
34.5644384808838 6.43617047395789 0.585106406723445
34.5846620965749 7.76595776196572 0.64271523744401
34.604885712266 6.01063854179539 0.565433310857768
34.625109327957 6.96808538916102 0.608804447167049
34.6453329436481 5.58510660963288 0.545050594776606
34.6655565593392 7.44680881284384 0.629370215232479
34.6857801750302 6.43617047395789 0.585106406723445
34.7060037907213 7.12765986372196 0.615736030455294
34.7262274064124 7.92553223652666 0.64928489952653
34.7464510221034 6.27659599939695 0.5778074963847
34.7666746377945 5.90425555875476 0.560407137255822
34.7868982534856 7.81914925348604 0.64491256090486
34.8071218691766 6.54255345699852 0.5899221785364
34.8273454848677 7.55319179588447 0.633849775074574
34.8475691005588 7.23404284676259 0.620314056540036
34.8677927162498 7.07446837220165 0.613434205461912
34.8880163319409 6.22340450787664 0.575353950284691
34.908239947632 6.80851091460008 0.601793029687043
34.928463563323 7.60638328740478 0.636077724914372
34.9486871790141 7.18085135524228 0.618029282454318
34.9689107947052 6.64893644003915 0.594698954320119
34.9891344103962 6.54255345699852 0.5899221785364
35.0093580260873 6.91489389764071 0.606476314558303
35.0295816417784 8.03191521956729 0.653627990751228
35.0498052574694 7.12765986372196 0.615736030455294
35.0700288731605 7.2872343382829 0.622590446048853
35.0902524888515 8.24468118564854 0.662228728895168
35.1104761045426 6.80851091460008 0.601793029687043
35.1306997202337 8.40425566020948 0.668606680855476
35.1509233359247 7.97872372804697 0.651460064411727
35.1711469516158 7.23404284676259 0.620314056540036
35.1913705673069 6.22340450787664 0.575353950284691
35.2115941829979 8.29787267716885 0.664361516152362
35.231817798689 7.71276627044541 0.640510375928879
35.2520414143801 8.0851067110876 0.655788750333248
35.2722650300711 8.61702162629073 0.677017158397923
35.2924886457622 7.6595747789251 0.638297898243758
35.3127122614533 7.50000030436416 0.631613966431975
35.3329358771443 8.82978759237199 0.685324428169477
35.3531594928354 8.8829790838923 0.687385558923066
35.3733831085265 9.14893654149386 0.697599871320769
35.3936067242175 7.92553223652666 0.64928489952653
35.4138303399086 8.24468118564854 0.662228728895168
35.4340539555997 8.03191521956729 0.653627990751228
35.4542775712907 7.02127688068134 0.611123710602471
35.4745011869818 7.87234074500635 0.647102423100873
35.4947248026729 9.36170250757512 0.705664877648999
35.5149484183639 7.92553223652666 0.64928489952653
35.535172034055 8.72340460933136 0.681183457157842
35.5553956497461 8.72340460933136 0.681183457157842
35.5756192654371 8.98936206693292 0.691489389764071
35.5958428811282 9.73404294821731 0.71956115997076
35.6160664968193 7.97872372804697 0.651460064411727
35.6362901125103 8.72340460933136 0.681183457157842
35.6565137282014 8.0851067110876 0.655788750333248
35.6767373438925 9.46808549061574 0.709663010933843
35.6969609595835 7.97872372804697 0.651460064411727
35.7171845752746 7.60638328740478 0.636077724914372
35.7374081909657 8.8829790838923 0.687385558923066
35.7576318066567 7.71276627044541 0.640510375928879
35.7778554223478 8.0851067110876 0.655788750333248
35.7980790380389 8.03191521956729 0.653627990751228
35.8183026537299 7.6595747789251 0.638297898243758
35.838526269421 8.19148969412823 0.660089050510576
35.858749885112 7.55319179588447 0.633849775074574
35.8789735008031 8.40425566020948 0.668606680855476
35.8991971164942 7.02127688068134 0.611123710602471
35.9194207321852 7.76595776196572 0.64271523744401
35.9396443478763 7.87234074500635 0.647102423100873
35.9598679635674 8.45744715172979 0.670719187480671
35.9800915792584 7.81914925348604 0.64491256090486
36.0003151949495 8.56383013477042 0.674924364647657
36.0205388106406 8.45744715172979 0.670719187480671
36.0407624263316 7.97872372804697 0.651460064411727
36.0609860420227 8.82978759237199 0.685324428169477
36.0812096577138 8.29787267716885 0.664361516152362
36.1014332734048 7.87234074500635 0.647102423100873
36.1216568890959 6.91489389764071 0.606476314558303
36.141880504787 7.76595776196572 0.64271523744401
36.162104120478 6.70212793155946 0.59707301148151
36.1823277361691 8.0851067110876 0.655788750333248
36.2025513518602 7.23404284676259 0.620314056540036
36.2227749675512 7.07446837220165 0.613434205461912
36.2429985832423 6.70212793155946 0.59707301148151
36.2632221989334 8.61702162629073 0.677017158397923
36.2834458146244 5.53191511811257 0.542448906438364
36.3036694303155 6.38297898243758 0.582683595460406
36.3238930460066 7.50000030436416 0.631613966431975
36.3441166616976 8.8829790838923 0.687385558923066
36.3643402773887 7.18085135524228 0.618029282454318
36.3845638930798 7.34042582980322 0.624858542617019
36.4047875087708 7.12765986372196 0.615736030455294
36.4250111244619 7.60638328740478 0.636077724914372
36.445234740153 7.2872343382829 0.622590446048853
36.465458355844 8.45744715172979 0.670719187480671
36.4856819715351 7.02127688068134 0.611123710602471
36.5059055872262 7.55319179588447 0.633849775074574
36.5261292029172 6.8617024061204 0.604139210240542
36.5463528186083 7.2872343382829 0.622590446048853
36.5665764342994 6.17021301635633 0.572889896348368
36.5868000499904 6.11702152483601 0.570415198401908
36.6070236656815 7.92553223652666 0.64928489952653
36.6272472813725 7.18085135524228 0.618029282454318
36.6474708970636 7.50000030436416 0.631613966431975
36.6676945127547 6.8617024061204 0.604139210240542
36.6879181284457 7.6595747789251 0.638297898243758
36.7081417441368 8.03191521956729 0.653627990751228
36.7283653598279 8.61702162629073 0.677017158397923
36.7485889755189 7.39361732132353 0.62711843622367
36.76881259121 7.55319179588447 0.633849775074574
36.7890362069011 8.19148969412823 0.660089050510576
36.8092598225921 6.59574494851883 0.59231538178515
36.8294834382832 6.48936196547821 0.587519226884514
36.8497070539743 7.23404284676259 0.620314056540036
36.8699306696653 6.54255345699852 0.5899221785364
36.8901542853564 6.01063854179539 0.565433310857768
36.9103779010475 8.40425566020948 0.668606680855476
36.9306015167385 6.75531942307977 0.599437666325494
36.9508251324296 7.02127688068134 0.611123710602471
36.9710487481207 5.69148959267351 0.550217066626112
36.9912723638117 6.0638300333157 0.567929717304644
37.0114959795028 6.54255345699852 0.5899221785364
37.0317195951939 5.90425555875476 0.560407137255822
37.0519432108849 5.6382981011532 0.547639923340591
37.072166826576 5.37234064355163 0.534567873881054
37.0923904422671 6.22340450787664 0.575353950284691
37.1126140579581 8.24468118564854 0.662228728895168
37.1328376736492 6.70212793155946 0.59707301148151
37.1530612893403 5.85106406723445 0.55787706953872
37.1732849050313 5.37234064355163 0.534567873881054
37.1935085207224 5.37234064355163 0.534567873881054
37.2137321364135 6.48936196547821 0.587519226884514
37.2339557521045 5.53191511811257 0.542448906438364
37.2541793677956 4.78723423682818 0.504618796037166
37.2744029834867 6.70212793155946 0.59707301148151
37.2946265991777 6.01063854179539 0.565433310857768
37.3148502148688 6.91489389764071 0.606476314558303
37.3350738305599 6.48936196547821 0.587519226884514
37.3552974462509 5.90425555875476 0.560407137255822
37.375521061942 6.64893644003915 0.594698954320119
37.395744677633 6.59574494851883 0.59231538178515
37.4159682933241 5.15957467747038 0.523875436249008
37.4361919090152 5.265957660511 0.529248658236749
37.4564155247062 5.21276616899069 0.526568900976162
37.4766391403973 5.69148959267351 0.550217066626112
37.4968627560884 6.64893644003915 0.594698954320119
37.5170863717794 4.52127677922662 0.490401320821245
37.5373099874705 6.64893644003915 0.594698954320119
37.5575336031616 4.73404274530787 0.501807527388583
37.5777572188526 6.27659599939695 0.5778074963847
37.5979808345437 5.90425555875476 0.560407137255822
37.6182044502348 5.69148959267351 0.550217066626112
37.6384280659258 5.79787257571413 0.555335475138186
37.6586516816169 5.37234064355163 0.534567873881054
37.678875297308 6.01063854179539 0.565433310857768
37.699098912999 5.79787257571413 0.555335475138186
37.7193225286901 5.15957467747038 0.523875436249008
37.7395461443812 5.15957467747038 0.523875436249008
37.7597697600722 5.53191511811257 0.542448906438364
37.7799933757633 5.85106406723445 0.55787706953872
37.8002169914544 5.42553213507194 0.537207731288247
37.8204406071454 5.05319169442975 0.518446528742142
37.8406642228365 5.05319169442975 0.518446528742142
37.8608878385276 5.47872362659226 0.539834679625181
37.8811114542186 5.31914915203132 0.531914915203132
37.9013350699097 4.89361721986881 0.510194863610278
37.9215586856008 5.53191511811257 0.542448906438364
37.9417823012918 5.10638318595006 0.521168051529382
37.9620059169829 6.38297898243758 0.582683595460406
37.982229532674 5.05319169442975 0.518446528742142
38.002453148365 5.10638318595006 0.521168051529382
38.0226767640561 6.11702152483601 0.570415198401908
38.0429003797472 6.75531942307977 0.599437666325494
38.0631239954382 4.36170230466568 0.481669441788406
38.0833476111293 5.00000020290944 0.515710644057907
38.1035712268204 5.79787257571413 0.555335475138186
38.1237948425114 5.21276616899069 0.526568900976162
38.1440184582025 6.0638300333157 0.567929717304644
38.1642420738935 4.8404257283485 0.507414489430638
38.1844656895846 5.37234064355163 0.534567873881054
38.2046893052757 5.21276616899069 0.526568900976162
38.2249129209667 4.78723423682818 0.504618796037166
38.2451365366578 5.265957660511 0.529248658236749
38.2653601523489 5.10638318595006 0.521168051529382
38.2855837680399 4.89361721986881 0.510194863610278
38.305807383731 4.94680871138912 0.512960167678218
38.3260309994221 5.05319169442975 0.518446528742142
38.3462546151131 5.42553213507194 0.537207731288247
38.3664782308042 5.58510660963288 0.545050594776606
38.3867018464953 5.31914915203132 0.531914915203132
38.4069254621863 6.48936196547821 0.587519226884514
38.4271490778774 5.31914915203132 0.531914915203132
38.4473726935685 5.265957660511 0.529248658236749
38.4675963092595 6.0638300333157 0.567929717304644
38.4878199249506 5.69148959267351 0.550217066626112
38.5080435406417 5.31914915203132 0.531914915203132
38.5282671563327 5.47872362659226 0.539834679625181
38.5484907720238 5.37234064355163 0.534567873881054
38.5687143877149 4.30851081314537 0.478723423682818
38.5889380034059 5.58510660963288 0.545050594776606
38.609161619097 5.31914915203132 0.531914915203132
38.6293852347881 4.41489379618599 0.48459755047143
38.6496088504791 5.21276616899069 0.526568900976162
38.6698324661702 5.42553213507194 0.537207731288247
38.6900560818613 4.94680871138912 0.512960167678218
38.7102796975523 5.79787257571413 0.555335475138186
38.7305033132434 5.95744705027507 0.562925833709398
38.7507269289345 5.53191511811257 0.542448906438364
38.7709505446255 5.21276616899069 0.526568900976162
38.7911741603166 4.78723423682818 0.504618796037166
38.8113977760077 4.68085125378756 0.498980420230782
38.8316213916987 5.15957467747038 0.523875436249008
38.8518450073898 6.32978749091727 0.580250667943183
38.8720686230809 5.15957467747038 0.523875436249008
38.8922922387719 5.42553213507194 0.537207731288247
38.912515854463 5.47872362659226 0.539834679625181
38.932739470154 5.42553213507194 0.537207731288247
38.9529630858451 5.53191511811257 0.542448906438364
38.9731867015362 5.74468108419382 0.552782195061309
38.9934103172272 5.15957467747038 0.523875436249008
39.0136339329183 4.94680871138912 0.512960167678218
39.0338575486094 5.00000020290944 0.515710644057907
39.0540811643004 5.15957467747038 0.523875436249008
39.0743047799915 5.10638318595006 0.521168051529382
39.0945283956826 4.62765976226725 0.49613720380912
39.1147520113736 4.14893633858443 0.469774533230711
39.1349756270647 5.90425555875476 0.560407137255822
39.1551992427558 5.10638318595006 0.521168051529382
39.1754228584468 5.90425555875476 0.560407137255822
39.1956464741379 4.57446827074693 0.493277599565779
39.215870089829 6.17021301635633 0.572889896348368
39.23609370552 4.78723423682818 0.504618796037166
39.2563173212111 4.52127677922662 0.490401320821245
39.2765409369022 5.53191511811257 0.542448906438364
39.2967645525932 4.78723423682818 0.504618796037166
39.3169881682843 5.37234064355163 0.534567873881054
39.3372117839754 4.62765976226725 0.49613720380912
39.3574353996664 6.54255345699852 0.5899221785364
39.3776590153575 5.265957660511 0.529248658236749
39.3978826310486 4.52127677922662 0.490401320821245
39.4181062467396 6.01063854179539 0.565433310857768
39.4383298624307 4.8404257283485 0.507414489430638
39.4585534781218 4.25531932162505 0.475759163456095
39.4787770938128 5.21276616899069 0.526568900976162
39.4990007095039 5.05319169442975 0.518446528742142
39.519224325195 5.53191511811257 0.542448906438364
39.539447940886 5.6382981011532 0.547639923340591
39.5596715565771 4.68085125378756 0.498980420230782
39.5798951722682 5.00000020290944 0.515710644057907
39.6001187879592 5.21276616899069 0.526568900976162
39.6203424036503 4.52127677922662 0.490401320821245
39.6405660193414 5.47872362659226 0.539834679625181
39.6607896350324 5.53191511811257 0.542448906438364
39.6810132507235 4.94680871138912 0.512960167678218
39.7012368664145 5.85106406723445 0.55787706953872
39.7214604821056 5.15957467747038 0.523875436249008
39.7416840977967 5.69148959267351 0.550217066626112
39.7619077134877 4.30851081314537 0.478723423682818
39.7821313291788 4.46808528770631 0.487508072438874
39.8023549448699 5.79787257571413 0.555335475138186
39.8225785605609 6.11702152483601 0.570415198401908
39.842802176252 5.47872362659226 0.539834679625181
39.8630257919431 5.74468108419382 0.552782195061309
39.8832494076341 5.90425555875476 0.560407137255822
39.9034730233252 6.32978749091727 0.580250667943183
39.9236966390163 5.95744705027507 0.562925833709398
39.9439202547073 5.05319169442975 0.518446528742142
39.9641438703984 5.69148959267351 0.550217066626112
39.9843674860895 5.37234064355163 0.534567873881054
40.0045911017805 5.37234064355163 0.534567873881054
40.0248147174716 6.59574494851883 0.59231538178515
40.0450383331627 5.42553213507194 0.537207731288247
40.0652619488537 5.265957660511 0.529248658236749
40.0854855645448 5.265957660511 0.529248658236749
40.1057091802359 5.53191511811257 0.542448906438364
40.1259327959269 6.75531942307977 0.599437666325494
40.146156411618 5.79787257571413 0.555335475138186
40.1663800273091 6.17021301635633 0.572889896348368
40.1866036430001 5.79787257571413 0.555335475138186
40.2068272586912 5.31914915203132 0.531914915203132
40.2270508743823 6.17021301635633 0.572889896348368
40.2472744900733 4.73404274530787 0.501807527388583
40.2674981057644 6.48936196547821 0.587519226884514
40.2877217214555 5.85106406723445 0.55787706953872
40.3079453371465 4.89361721986881 0.510194863610278
40.3281689528376 5.53191511811257 0.542448906438364
40.3483925685287 5.00000020290944 0.515710644057907
40.3686161842197 4.89361721986881 0.510194863610278
40.3888397999108 5.53191511811257 0.542448906438364
40.4090634156019 5.31914915203132 0.531914915203132
40.4292870312929 5.15957467747038 0.523875436249008
40.449510646984 5.00000020290944 0.515710644057907
40.469734262675 6.32978749091727 0.580250667943183
40.4899578783661 5.265957660511 0.529248658236749
40.5101814940572 4.62765976226725 0.49613720380912
40.5304051097482 5.31914915203132 0.531914915203132
40.5506287254393 5.79787257571413 0.555335475138186
40.5708523411304 5.58510660963288 0.545050594776606
40.5910759568214 4.89361721986881 0.510194863610278
40.6112995725125 5.21276616899069 0.526568900976162
40.6315231882036 5.6382981011532 0.547639923340591
40.6517468038946 5.47872362659226 0.539834679625181
40.6719704195857 4.36170230466568 0.481669441788406
40.6921940352768 5.15957467747038 0.523875436249008
40.7124176509678 5.37234064355163 0.534567873881054
40.7326412666589 5.21276616899069 0.526568900976162
40.75286488235 4.78723423682818 0.504618796037166
40.773088498041 4.73404274530787 0.501807527388583
40.7933121137321 6.0638300333157 0.567929717304644
40.8135357294232 5.265957660511 0.529248658236749
40.8337593451142 5.31914915203132 0.531914915203132
40.8539829608053 6.01063854179539 0.565433310857768
40.8742065764964 4.46808528770631 0.487508072438874
40.8944301921874 5.69148959267351 0.550217066626112
40.9146538078785 5.85106406723445 0.55787706953872
40.9348774235696 5.79787257571413 0.555335475138186
40.9551010392606 5.6382981011532 0.547639923340591
40.9753246549517 5.15957467747038 0.523875436249008
40.9955482706428 4.52127677922662 0.490401320821245
41.0157718863338 6.0638300333157 0.567929717304644
41.0359955020249 5.265957660511 0.529248658236749
41.056219117716 5.90425555875476 0.560407137255822
41.076442733407 4.89361721986881 0.510194863610278
41.0966663490981 5.53191511811257 0.542448906438364
41.1168899647892 5.58510660963288 0.545050594776606
41.1371135804802 5.265957660511 0.529248658236749
41.1573371961713 6.01063854179539 0.565433310857768
41.1775608118624 5.6382981011532 0.547639923340591
41.1977844275534 6.17021301635633 0.572889896348368
41.2180080432445 4.94680871138912 0.512960167678218
41.2382316589355 5.6382981011532 0.547639923340591
41.2584552746266 5.00000020290944 0.515710644057907
41.2786788903177 4.46808528770631 0.487508072438874
41.2989025060087 5.00000020290944 0.515710644057907
41.3191261216998 4.46808528770631 0.487508072438874
41.3393497373909 5.90425555875476 0.560407137255822
41.3595733530819 6.0638300333157 0.567929717304644
41.379796968773 5.74468108419382 0.552782195061309
41.4000205844641 5.74468108419382 0.552782195061309
41.4202442001551 5.42553213507194 0.537207731288247
41.4404678158462 5.6382981011532 0.547639923340591
41.4606914315373 6.0638300333157 0.567929717304644
41.4809150472283 5.15957467747038 0.523875436249008
41.5011386629194 4.94680871138912 0.512960167678218
41.5213622786105 4.73404274530787 0.501807527388583
41.5415858943015 5.6382981011532 0.547639923340591
41.5618095099926 5.265957660511 0.529248658236749
41.5820331256837 5.05319169442975 0.518446528742142
41.6022567413747 4.52127677922662 0.490401320821245
41.6224803570658 5.00000020290944 0.515710644057907
41.6427039727569 6.27659599939695 0.5778074963847
41.6629275884479 5.31914915203132 0.531914915203132
41.683151204139 5.74468108419382 0.552782195061309
41.7033748198301 5.265957660511 0.529248658236749
41.7235984355211 5.53191511811257 0.542448906438364
41.7438220512122 5.31914915203132 0.531914915203132
41.7640456669033 4.41489379618599 0.48459755047143
41.7842692825943 5.6382981011532 0.547639923340591
41.8044928982854 5.85106406723445 0.55787706953872
41.8247165139765 5.53191511811257 0.542448906438364
41.8449401296675 6.01063854179539 0.565433310857768
41.8651637453586 4.57446827074693 0.493277599565779
41.8853873610497 5.95744705027507 0.562925833709398
41.9056109767407 5.79787257571413 0.555335475138186
41.9258345924318 5.265957660511 0.529248658236749
41.9460582081228 5.00000020290944 0.515710644057907
41.9662818238139 6.22340450787664 0.575353950284691
41.986505439505 5.58510660963288 0.545050594776606
42.006729055196 5.69148959267351 0.550217066626112
42.0269526708871 4.8404257283485 0.507414489430638
42.0471762865782 6.27659599939695 0.5778074963847
42.0673999022692 4.73404274530787 0.501807527388583
42.0876235179603 5.10638318595006 0.521168051529382
42.1078471336514 5.05319169442975 0.518446528742142
42.1280707493424 6.01063854179539 0.565433310857768
42.1482943650335 5.21276616899069 0.526568900976162
42.1685179807246 5.6382981011532 0.547639923340591
42.1887415964156 4.36170230466568 0.481669441788406
42.2089652121067 5.37234064355163 0.534567873881054
42.2291888277978 6.32978749091727 0.580250667943183
42.2494124434888 5.37234064355163 0.534567873881054
42.2696360591799 5.37234064355163 0.534567873881054
42.289859674871 6.01063854179539 0.565433310857768
42.310083290562 5.58510660963288 0.545050594776606
42.3303069062531 4.25531932162505 0.475759163456095
42.3505305219442 4.8404257283485 0.507414489430638
42.3707541376352 5.10638318595006 0.521168051529382
42.3909777533263 4.89361721986881 0.510194863610278
42.4112013690174 5.58510660963288 0.545050594776606
42.4314249847084 5.42553213507194 0.537207731288247
42.4516486003995 5.47872362659226 0.539834679625181
42.4718722160906 6.32978749091727 0.580250667943183
42.4920958317816 4.78723423682818 0.504618796037166
42.5123194474727 4.41489379618599 0.48459755047143
42.5325430631638 6.11702152483601 0.570415198401908
42.5527666788548 4.57446827074693 0.493277599565779
42.5729902945459 4.73404274530787 0.501807527388583
42.593213910237 4.73404274530787 0.501807527388583
42.613437525928 5.37234064355163 0.534567873881054
42.6336611416191 5.10638318595006 0.521168051529382
42.6538847573102 5.58510660963288 0.545050594776606
42.6741083730012 6.01063854179539 0.565433310857768
42.6943319886923 5.21276616899069 0.526568900976162
42.7145556043833 4.36170230466568 0.481669441788406
42.7347792200744 5.10638318595006 0.521168051529382
42.7550028357655 5.69148959267351 0.550217066626112
42.7752264514565 5.10638318595006 0.521168051529382
42.7954500671476 5.53191511811257 0.542448906438364
42.8156736828387 4.94680871138912 0.512960167678218
42.8358972985297 6.48936196547821 0.587519226884514
42.8561209142208 6.27659599939695 0.5778074963847
42.8763445299119 5.42553213507194 0.537207731288247
42.8965681456029 5.69148959267351 0.550217066626112
42.916791761294 4.62765976226725 0.49613720380912
42.9370153769851 6.01063854179539 0.565433310857768
42.9572389926761 6.01063854179539 0.565433310857768
42.9774626083672 5.42553213507194 0.537207731288247
42.9976862240583 5.69148959267351 0.550217066626112
43.0179098397493 5.00000020290944 0.515710644057907
43.0381334554404 4.57446827074693 0.493277599565779
43.0583570711315 6.22340450787664 0.575353950284691
43.0785806868225 4.41489379618599 0.48459755047143
43.0988043025136 4.89361721986881 0.510194863610278
43.1190279182047 5.6382981011532 0.547639923340591
43.1392515338957 5.00000020290944 0.515710644057907
43.1594751495868 5.69148959267351 0.550217066626112
43.1796987652779 4.8404257283485 0.507414489430638
43.1999223809689 6.0638300333157 0.567929717304644
43.22014599666 5.53191511811257 0.542448906438364
43.2403696123511 5.31914915203132 0.531914915203132
43.2605932280421 6.11702152483601 0.570415198401908
43.2808168437332 5.90425555875476 0.560407137255822
43.3010404594243 5.74468108419382 0.552782195061309
43.3212640751153 5.21276616899069 0.526568900976162
43.3414876908064 5.95744705027507 0.562925833709398
43.3617113064975 5.95744705027507 0.562925833709398
43.3819349221885 4.30851081314537 0.478723423682818
43.4021585378796 5.58510660963288 0.545050594776606
43.4223821535707 5.53191511811257 0.542448906438364
43.4426057692617 4.30851081314537 0.478723423682818
43.4628293849528 5.95744705027507 0.562925833709398
43.4830530006438 5.85106406723445 0.55787706953872
43.5032766163349 5.53191511811257 0.542448906438364
43.523500232026 6.54255345699852 0.5899221785364
43.543723847717 6.17021301635633 0.572889896348368
43.5639474634081 5.10638318595006 0.521168051529382
43.5841710790992 5.47872362659226 0.539834679625181
43.6043946947902 5.10638318595006 0.521168051529382
43.6246183104813 5.85106406723445 0.55787706953872
43.6448419261724 4.94680871138912 0.512960167678218
43.6650655418634 5.21276616899069 0.526568900976162
43.6852891575545 6.01063854179539 0.565433310857768
43.7055127732456 4.41489379618599 0.48459755047143
43.7257363889366 4.57446827074693 0.493277599565779
43.7459600046277 6.22340450787664 0.575353950284691
43.7661836203188 5.00000020290944 0.515710644057907
43.7864072360098 5.42553213507194 0.537207731288247
43.8066308517009 5.74468108419382 0.552782195061309
43.826854467392 4.62765976226725 0.49613720380912
43.847078083083 4.89361721986881 0.510194863610278
43.8673016987741 5.58510660963288 0.545050594776606
43.8875253144652 4.73404274530787 0.501807527388583
43.9077489301562 5.265957660511 0.529248658236749
43.9279725458473 4.0425533555438 0.463712672386492
43.9481961615384 5.69148959267351 0.550217066626112
43.9684197772294 5.10638318595006 0.521168051529382
43.9886433929205 6.11702152483601 0.570415198401908
44.0088670086116 5.10638318595006 0.521168051529382
44.0290906243026 4.57446827074693 0.493277599565779
44.0493142399937 5.69148959267351 0.550217066626112
44.0695378556848 5.21276616899069 0.526568900976162
44.0897614713758 5.00000020290944 0.515710644057907
44.1099850870669 5.05319169442975 0.518446528742142
44.130208702758 4.68085125378756 0.498980420230782
44.150432318449 5.21276616899069 0.526568900976162
44.1706559341401 4.62765976226725 0.49613720380912
44.1908795498312 4.89361721986881 0.510194863610278
44.2111031655222 5.00000020290944 0.515710644057907
44.2313267812133 5.6382981011532 0.547639923340591
44.2515503969043 4.30851081314537 0.478723423682818
44.2717740125954 5.15957467747038 0.523875436249008
44.2919976282865 4.30851081314537 0.478723423682818
44.3122212439775 5.42553213507194 0.537207731288247
44.3324448596686 5.53191511811257 0.542448906438364
44.3526684753597 5.31914915203132 0.531914915203132
44.3728920910507 5.79787257571413 0.555335475138186
44.3931157067418 3.93617037250317 0.457570511496874
44.4133393224329 5.95744705027507 0.562925833709398
44.4335629381239 4.8404257283485 0.507414489430638
44.453786553815 4.46808528770631 0.487508072438874
44.4740101695061 4.73404274530787 0.501807527388583
44.4942337851971 5.53191511811257 0.542448906438364
44.5144574008882 5.69148959267351 0.550217066626112
44.5346810165793 5.15957467747038 0.523875436249008
44.5549046322703 5.05319169442975 0.518446528742142
44.5751282479614 5.10638318595006 0.521168051529382
44.5953518636525 4.89361721986881 0.510194863610278
44.6155754793435 5.69148959267351 0.550217066626112
44.6357990950346 4.36170230466568 0.481669441788406
44.6560227107257 4.73404274530787 0.501807527388583
44.6762463264167 4.68085125378756 0.498980420230782
44.6964699421078 5.15957467747038 0.523875436249008
44.7166935577989 4.94680871138912 0.512960167678218
44.7369171734899 4.73404274530787 0.501807527388583
44.757140789181 4.41489379618599 0.48459755047143
44.7773644048721 4.36170230466568 0.481669441788406
44.7975880205631 5.05319169442975 0.518446528742142
44.8178116362542 5.00000020290944 0.515710644057907
44.8380352519453 5.31914915203132 0.531914915203132
44.8582588676363 5.10638318595006 0.521168051529382
44.8784824833274 6.0638300333157 0.567929717304644
44.8987060990185 5.05319169442975 0.518446528742142
44.9189297147095 4.20212783010474 0.472776317979537
44.9391533304006 5.74468108419382 0.552782195061309
44.9593769460917 4.8404257283485 0.507414489430638
44.9796005617827 5.21276616899069 0.526568900976162
44.9998241774738 4.78723423682818 0.504618796037166
45.0200477931648 4.14893633858443 0.469774533230711
45.0402714088559 4.52127677922662 0.490401320821245
45.060495024547 5.42553213507194 0.537207731288247
45.080718640238 4.14893633858443 0.469774533230711
45.1009422559291 4.30851081314537 0.478723423682818
45.1211658716202 4.89361721986881 0.510194863610278
45.1413894873112 4.89361721986881 0.510194863610278
45.1616131030023 5.15957467747038 0.523875436249008
45.1818367186934 5.31914915203132 0.531914915203132
45.2020603343844 5.47872362659226 0.539834679625181
45.2222839500755 4.89361721986881 0.510194863610278
45.2425075657666 5.42553213507194 0.537207731288247
45.2627311814576 4.8404257283485 0.507414489430638
45.2829547971487 4.78723423682818 0.504618796037166
45.3031784128398 4.62765976226725 0.49613720380912
45.3234020285308 4.62765976226725 0.49613720380912
45.3436256442219 4.78723423682818 0.504618796037166
45.363849259913 4.57446827074693 0.493277599565779
45.384072875604 4.25531932162505 0.475759163456095
45.4042964912951 4.46808528770631 0.487508072438874
45.4245201069862 5.21276616899069 0.526568900976162
45.4447437226772 5.21276616899069 0.526568900976162
45.4649673383683 4.52127677922662 0.490401320821245
45.4851909540594 5.6382981011532 0.547639923340591
45.5054145697504 4.14893633858443 0.469774533230711
45.5256381854415 4.89361721986881 0.510194863610278
45.5458618011326 4.20212783010474 0.472776317979537
45.5660854168236 4.36170230466568 0.481669441788406
45.5863090325147 3.98936186402349 0.460651829217758
45.6065326482058 5.58510660963288 0.545050594776606
45.6267562638968 4.52127677922662 0.490401320821245
45.6469798795879 4.73404274530787 0.501807527388583
45.667203495279 5.15957467747038 0.523875436249008
45.68742711097 4.25531932162505 0.475759163456095
45.7076507266611 5.05319169442975 0.518446528742142
45.7278743423522 5.42553213507194 0.537207731288247
45.7480979580432 3.88297888098286 0.454468302768581
45.7683215737343 4.46808528770631 0.487508072438874
45.7885451894253 4.89361721986881 0.510194863610278
45.8087688051164 5.79787257571413 0.555335475138186
45.8289924208075 5.10638318595006 0.521168051529382
45.8492160364985 5.37234064355163 0.534567873881054
45.8694396521896 5.95744705027507 0.562925833709398
45.8896632678807 4.25531932162505 0.475759163456095
45.9098868835717 4.52127677922662 0.490401320821245
45.9301104992628 4.46808528770631 0.487508072438874
45.9503341149539 4.68085125378756 0.498980420230782
45.9705577306449 4.8404257283485 0.507414489430638
45.990781346336 4.46808528770631 0.487508072438874
46.0110049620271 4.09574484706411 0.466753443803018
46.0312285777181 4.78723423682818 0.504618796037166
46.0514521934092 4.68085125378756 0.498980420230782
46.0716758091003 4.68085125378756 0.498980420230782
46.0918994247913 3.98936186402349 0.460651829217758
46.1121230404824 5.265957660511 0.529248658236749
46.1323466561735 4.46808528770631 0.487508072438874
46.1525702718645 4.89361721986881 0.510194863610278
46.1727938875556 4.68085125378756 0.498980420230782
46.1930175032467 5.05319169442975 0.518446528742142
46.2132411189377 4.30851081314537 0.478723423682818
46.2334647346288 4.62765976226725 0.49613720380912
46.2536883503199 4.94680871138912 0.512960167678218
46.2739119660109 4.57446827074693 0.493277599565779
46.294135581702 4.57446827074693 0.493277599565779
46.3143591973931 4.62765976226725 0.49613720380912
46.3345828130841 5.00000020290944 0.515710644057907
46.3548064287752 4.52127677922662 0.490401320821245
46.3750300444663 4.41489379618599 0.48459755047143
46.3952536601573 3.88297888098286 0.454468302768581
46.4154772758484 5.265957660511 0.529248658236749
46.4357008915395 4.09574484706411 0.466753443803018
46.4559245072305 4.14893633858443 0.469774533230711
46.4761481229216 4.57446827074693 0.493277599565779
46.4963717386127 3.67021291490161 0.441841712766838
46.5165953543037 4.89361721986881 0.510194863610278
46.5368189699948 5.74468108419382 0.552782195061309
46.5570425856858 4.8404257283485 0.507414489430638
46.5772662013769 4.52127677922662 0.490401320821245
46.597489817068 5.31914915203132 0.531914915203132
46.617713432759 5.69148959267351 0.550217066626112
46.6379370484501 5.21276616899069 0.526568900976162
46.6581606641412 4.14893633858443 0.469774533230711
46.6783842798322 4.78723423682818 0.504618796037166
46.6986078955233 4.94680871138912 0.512960167678218
46.7188315112144 4.62765976226725 0.49613720380912
46.7390551269054 5.00000020290944 0.515710644057907
46.7592787425965 4.62765976226725 0.49613720380912
46.7795023582876 4.52127677922662 0.490401320821245
46.7997259739786 4.52127677922662 0.490401320821245
46.8199495896697 5.05319169442975 0.518446528742142
46.8401732053608 5.10638318595006 0.521168051529382
46.8603968210518 5.10638318595006 0.521168051529382
46.8806204367429 4.41489379618599 0.48459755047143
46.900844052434 5.10638318595006 0.521168051529382
46.921067668125 5.21276616899069 0.526568900976162
46.9412912838161 4.57446827074693 0.493277599565779
46.9615148995072 5.74468108419382 0.552782195061309
46.9817385151982 5.05319169442975 0.518446528742142
47.0019621308893 4.36170230466568 0.481669441788406
47.0221857465804 4.25531932162505 0.475759163456095
47.0424093622714 4.62765976226725 0.49613720380912
47.0626329779625 3.77659589794223 0.448199474208799
47.0828565936536 4.0425533555438 0.463712672386492
47.1030802093446 4.52127677922662 0.490401320821245
47.1233038250357 5.31914915203132 0.531914915203132
47.1435274407268 4.46808528770631 0.487508072438874
47.1637510564178 5.31914915203132 0.531914915203132
47.1839746721089 5.31914915203132 0.531914915203132
47.2041982878 4.78723423682818 0.504618796037166
47.224421903491 4.89361721986881 0.510194863610278
47.2446455191821 3.88297888098286 0.454468302768581
47.2648691348732 4.36170230466568 0.481669441788406
47.2850927505642 4.68085125378756 0.498980420230782
47.3053163662553 4.68085125378756 0.498980420230782
47.3255399819463 4.30851081314537 0.478723423682818
47.3457635976374 4.89361721986881 0.510194863610278
47.3659872133285 5.31914915203132 0.531914915203132
47.3862108290195 4.78723423682818 0.504618796037166
47.4064344447106 5.58510660963288 0.545050594776606
47.4266580604017 4.62765976226725 0.49613720380912
47.4468816760927 4.25531932162505 0.475759163456095
47.4671052917838 5.53191511811257 0.542448906438364
47.4873289074749 4.41489379618599 0.48459755047143
47.5075525231659 4.09574484706411 0.466753443803018
47.527776138857 4.41489379618599 0.48459755047143
47.5479997545481 5.15957467747038 0.523875436249008
47.5682233702391 4.09574484706411 0.466753443803018
47.5884469859302 4.73404274530787 0.501807527388583
47.6086706016213 4.0425533555438 0.463712672386492
47.6288942173123 5.00000020290944 0.515710644057907
47.6491178330034 4.78723423682818 0.504618796037166
47.6693414486945 5.6382981011532 0.547639923340591
47.6895650643855 4.20212783010474 0.472776317979537
47.7097886800766 5.05319169442975 0.518446528742142
47.7300122957677 4.57446827074693 0.493277599565779
47.7502359114587 4.46808528770631 0.487508072438874
47.7704595271498 5.69148959267351 0.550217066626112
47.7906831428409 5.00000020290944 0.515710644057907
47.8109067585319 5.31914915203132 0.531914915203132
47.831130374223 4.52127677922662 0.490401320821245
47.8513539899141 4.20212783010474 0.472776317979537
47.8715776056051 4.25531932162505 0.475759163456095
47.8918012212962 4.25531932162505 0.475759163456095
47.9120248369873 4.20212783010474 0.472776317979537
47.9322484526783 4.78723423682818 0.504618796037166
47.9524720683694 3.67021291490161 0.441841712766838
47.9726956840605 4.94680871138912 0.512960167678218
47.9929192997515 3.93617037250317 0.457570511496874
48.0131429154426 4.73404274530787 0.501807527388583
48.0333665311337 5.42553213507194 0.537207731288247
48.0535901468247 5.79787257571413 0.555335475138186
48.0738137625158 4.62765976226725 0.49613720380912
48.0940373782068 4.0425533555438 0.463712672386492
48.1142609938979 4.36170230466568 0.481669441788406
48.134484609589 5.00000020290944 0.515710644057907
48.15470822528 4.8404257283485 0.507414489430638
48.1749318409711 5.31914915203132 0.531914915203132
48.1951554566622 4.14893633858443 0.469774533230711
48.2153790723532 3.98936186402349 0.460651829217758
48.2356026880443 4.30851081314537 0.478723423682818
48.2558263037354 4.41489379618599 0.48459755047143
48.2760499194264 6.11702152483601 0.570415198401908
48.2962735351175 4.41489379618599 0.48459755047143
48.3164971508086 4.73404274530787 0.501807527388583
48.3367207664996 4.41489379618599 0.48459755047143
48.3569443821907 5.10638318595006 0.521168051529382
48.3771679978818 3.72340440642192 0.445031947067723
48.3973916135728 3.88297888098286 0.454468302768581
48.4176152292639 5.10638318595006 0.521168051529382
48.437838844955 4.36170230466568 0.481669441788406
48.458062460646 4.09574484706411 0.466753443803018
48.4782860763371 4.25531932162505 0.475759163456095
48.4985096920282 4.57446827074693 0.493277599565779
48.5187333077192 4.46808528770631 0.487508072438874
48.5389569234103 4.14893633858443 0.469774533230711
48.5591805391014 4.68085125378756 0.498980420230782
48.5794041547924 4.89361721986881 0.510194863610278
48.5996277704835 5.42553213507194 0.537207731288247
48.6198513861746 4.20212783010474 0.472776317979537
48.6400750018656 4.41489379618599 0.48459755047143
48.6602986175567 5.90425555875476 0.560407137255822
48.6805222332478 5.05319169442975 0.518446528742142
48.7007458489388 4.41489379618599 0.48459755047143
48.7209694646299 5.58510660963288 0.545050594776606
48.741193080321 4.57446827074693 0.493277599565779
48.761416696012 3.98936186402349 0.460651829217758
48.7816403117031 5.05319169442975 0.518446528742142
48.8018639273942 4.57446827074693 0.493277599565779
48.8220875430852 4.09574484706411 0.466753443803018
48.8423111587763 3.93617037250317 0.457570511496874
48.8625347744673 5.21276616899069 0.526568900976162
48.8827583901584 4.41489379618599 0.48459755047143
48.9029820058495 4.0425533555438 0.463712672386492
48.9232056215405 4.20212783010474 0.472776317979537
48.9434292372316 5.21276616899069 0.526568900976162
48.9636528529227 4.52127677922662 0.490401320821245
48.9838764686137 4.94680871138912 0.512960167678218
49.0041000843048 4.30851081314537 0.478723423682818
49.0243236999959 4.73404274530787 0.501807527388583
49.0445473156869 4.46808528770631 0.487508072438874
49.064770931378 5.05319169442975 0.518446528742142
49.0849945470691 4.73404274530787 0.501807527388583
49.1052181627601 4.46808528770631 0.487508072438874
49.1254417784512 4.36170230466568 0.481669441788406
49.1456653941423 4.94680871138912 0.512960167678218
49.1658890098333 4.25531932162505 0.475759163456095
49.1861126255244 3.6170214233813 0.438628275844795
49.2063362412155 4.73404274530787 0.501807527388583
49.2265598569065 5.00000020290944 0.515710644057907
49.2467834725976 4.0425533555438 0.463712672386492
49.2670070882887 4.68085125378756 0.498980420230782
49.2872307039797 4.46808528770631 0.487508072438874
49.3074543196708 4.36170230466568 0.481669441788406
49.3276779353619 5.05319169442975 0.518446528742142
49.3479015510529 4.41489379618599 0.48459755047143
49.368125166744 4.25531932162505 0.475759163456095
49.3883487824351 3.98936186402349 0.460651829217758
49.4085723981261 4.36170230466568 0.481669441788406
49.4287960138172 5.90425555875476 0.560407137255822
49.4490196295083 4.46808528770631 0.487508072438874
49.4692432451993 5.37234064355163 0.534567873881054
49.4894668608904 5.00000020290944 0.515710644057907
49.5096904765815 3.82978738946255 0.451344772265282
49.5299140922725 3.82978738946255 0.451344772265282
49.5501377079636 4.20212783010474 0.472776317979537
49.5703613236547 4.57446827074693 0.493277599565779
49.5905849393457 4.78723423682818 0.504618796037166
49.6108085550368 4.73404274530787 0.501807527388583
49.6310321707278 4.68085125378756 0.498980420230782
49.6512557864189 4.30851081314537 0.478723423682818
49.67147940211 3.56382993186098 0.435391122555825
49.691703017801 4.52127677922662 0.490401320821245
49.7119266334921 4.46808528770631 0.487508072438874
49.7321502491832 4.20212783010474 0.472776317979537
49.7523738648742 4.68085125378756 0.498980420230782
49.7725974805653 4.62765976226725 0.49613720380912
49.7928210962564 4.25531932162505 0.475759163456095
49.8130447119474 4.8404257283485 0.507414489430638
49.8332683276385 4.62765976226725 0.49613720380912
49.8534919433296 4.20212783010474 0.472776317979537
49.8737155590206 4.0425533555438 0.463712672386492
49.8939391747117 4.73404274530787 0.501807527388583
49.9141627904028 4.52127677922662 0.490401320821245
49.9343864060938 5.37234064355163 0.534567873881054
49.9546100217849 3.56382993186098 0.435391122555825
49.974833637476 4.25531932162505 0.475759163456095
49.995057253167 4.14893633858443 0.469774533230711
50.0152808688581 3.82978738946255 0.451344772265282
50.0355044845492 3.93617037250317 0.457570511496874
50.0557281002402 4.25531932162505 0.475759163456095
50.0759517159313 4.30851081314537 0.478723423682818
50.0961753316224 5.15957467747038 0.523875436249008
50.1163989473134 4.68085125378756 0.498980420230782
50.1366225630045 4.0425533555438 0.463712672386492
50.1568461786956 3.6170214233813 0.438628275844795
50.1770697943866 4.46808528770631 0.487508072438874
50.1972934100777 4.46808528770631 0.487508072438874
50.2175170257688 4.62765976226725 0.49613720380912
50.2377406414598 4.25531932162505 0.475759163456095
50.2579642571509 4.36170230466568 0.481669441788406
50.278187872842 4.14893633858443 0.469774533230711
50.298411488533 5.00000020290944 0.515710644057907
50.3186351042241 4.0425533555438 0.463712672386492
50.3388587199152 4.14893633858443 0.469774533230711
50.3590823356062 5.00000020290944 0.515710644057907
50.3793059512973 5.00000020290944 0.515710644057907
50.3995295669883 4.20212783010474 0.472776317979537
50.4197531826794 4.68085125378756 0.498980420230782
50.4399767983705 4.52127677922662 0.490401320821245
50.4602004140615 4.78723423682818 0.504618796037166
50.4804240297526 4.68085125378756 0.498980420230782
50.5006476454437 5.10638318595006 0.521168051529382
50.5208712611347 4.78723423682818 0.504618796037166
50.5410948768258 3.93617037250317 0.457570511496874
50.5613184925169 5.31914915203132 0.531914915203132
50.5815421082079 4.73404274530787 0.501807527388583
50.601765723899 5.6382981011532 0.547639923340591
50.6219893395901 3.93617037250317 0.457570511496874
50.6422129552811 4.73404274530787 0.501807527388583
50.6624365709722 5.15957467747038 0.523875436249008
50.6826601866633 4.89361721986881 0.510194863610278
50.7028838023543 4.36170230466568 0.481669441788406
50.7231074180454 4.52127677922662 0.490401320821245
50.7433310337365 4.52127677922662 0.490401320821245
50.7635546494275 4.0425533555438 0.463712672386492
50.7837782651186 4.73404274530787 0.501807527388583
50.8040018808097 4.73404274530787 0.501807527388583
50.8242254965007 4.62765976226725 0.49613720380912
50.8444491121918 4.46808528770631 0.487508072438874
50.8646727278829 4.89361721986881 0.510194863610278
50.8848963435739 4.0425533555438 0.463712672386492
50.905119959265 4.52127677922662 0.490401320821245
50.9253435749561 3.98936186402349 0.460651829217758
50.9455671906471 4.89361721986881 0.510194863610278
50.9657908063382 4.36170230466568 0.481669441788406
50.9860144220293 4.30851081314537 0.478723423682818
51.0062380377203 4.62765976226725 0.49613720380912
51.0264616534114 5.47872362659226 0.539834679625181
51.0466852691025 4.36170230466568 0.481669441788406
51.0669088847935 4.20212783010474 0.472776317979537
51.0871325004846 4.78723423682818 0.504618796037166
51.1073561161757 4.89361721986881 0.510194863610278
51.1275797318667 4.68085125378756 0.498980420230782
51.1478033475578 4.89361721986881 0.510194863610278
51.1680269632488 3.77659589794223 0.448199474208799
51.1882505789399 4.46808528770631 0.487508072438874
51.208474194631 4.20212783010474 0.472776317979537
51.228697810322 4.25531932162505 0.475759163456095
51.2489214260131 4.68085125378756 0.498980420230782
51.2691450417042 3.56382993186098 0.435391122555825
51.2893686573952 4.57446827074693 0.493277599565779
51.3095922730863 4.0425533555438 0.463712672386492
51.3298158887774 4.0425533555438 0.463712672386492
51.3500395044684 4.0425533555438 0.463712672386492
51.3702631201595 5.05319169442975 0.518446528742142
51.3904867358506 4.62765976226725 0.49613720380912
51.4107103515416 4.73404274530787 0.501807527388583
51.4309339672327 4.62765976226725 0.49613720380912
51.4511575829238 4.46808528770631 0.487508072438874
51.4713811986148 4.52127677922662 0.490401320821245
51.4916048143059 4.20212783010474 0.472776317979537
51.511828429997 5.05319169442975 0.518446528742142
51.532052045688 4.41489379618599 0.48459755047143
51.5522756613791 4.94680871138912 0.512960167678218
51.5724992770702 3.45744694882036 0.428843514653201
51.5927228927612 3.45744694882036 0.428843514653201
51.6129465084523 4.20212783010474 0.472776317979537
51.6331701241434 4.20212783010474 0.472776317979537
51.6533937398344 4.46808528770631 0.487508072438874
51.6736173555255 4.20212783010474 0.472776317979537
51.6938409712166 4.41489379618599 0.48459755047143
51.7140645869076 4.73404274530787 0.501807527388583
51.7342882025987 4.62765976226725 0.49613720380912
51.7545118182898 4.41489379618599 0.48459755047143
51.7747354339808 4.36170230466568 0.481669441788406
51.7949590496719 4.41489379618599 0.48459755047143
51.815182665363 3.93617037250317 0.457570511496874
51.835406281054 4.52127677922662 0.490401320821245
51.8556298967451 5.47872362659226 0.539834679625181
51.8758535124362 4.36170230466568 0.481669441788406
51.8960771281272 4.25531932162505 0.475759163456095
51.9163007438183 3.82978738946255 0.451344772265282
51.9365243595093 4.09574484706411 0.466753443803018
51.9567479752004 4.14893633858443 0.469774533230711
51.9769715908915 4.46808528770631 0.487508072438874
51.9971952065825 4.68085125378756 0.498980420230782
52.0174188222736 3.77659589794223 0.448199474208799
52.0376424379647 4.52127677922662 0.490401320821245
52.0578660536557 4.68085125378756 0.498980420230782
52.0780896693468 3.88297888098286 0.454468302768581
52.0983132850379 4.20212783010474 0.472776317979537
52.1185369007289 4.30851081314537 0.478723423682818
52.13876051642 3.67021291490161 0.441841712766838
52.1589841321111 4.25531932162505 0.475759163456095
52.1792077478021 5.10638318595006 0.521168051529382
52.1994313634932 3.93617037250317 0.457570511496874
52.2196549791843 4.89361721986881 0.510194863610278
52.2398785948753 4.62765976226725 0.49613720380912
52.2601022105664 4.25531932162505 0.475759163456095
52.2803258262575 4.62765976226725 0.49613720380912
52.3005494419485 4.41489379618599 0.48459755047143
52.3207730576396 4.36170230466568 0.481669441788406
52.3409966733307 4.94680871138912 0.512960167678218
52.3612202890217 3.77659589794223 0.448199474208799
52.3814439047128 4.30851081314537 0.478723423682818
52.4016675204039 4.57446827074693 0.493277599565779
52.4218911360949 4.14893633858443 0.469774533230711
52.442114751786 3.93617037250317 0.457570511496874
52.4623383674771 5.42553213507194 0.537207731288247
52.4825619831681 3.93617037250317 0.457570511496874
52.5027855988592 4.20212783010474 0.472776317979537
52.5230092145503 5.15957467747038 0.523875436249008
52.5432328302413 4.0425533555438 0.463712672386492
52.5634564459324 4.0425533555438 0.463712672386492
52.5836800616235 5.15957467747038 0.523875436249008
52.6039036773145 4.73404274530787 0.501807527388583
52.6241272930056 5.53191511811257 0.542448906438364
52.6443509086967 4.25531932162505 0.475759163456095
52.6645745243877 4.09574484706411 0.466753443803018
52.6847981400788 5.10638318595006 0.521168051529382
52.7050217557698 4.30851081314537 0.478723423682818
52.7252453714609 4.94680871138912 0.512960167678218
52.745468987152 3.88297888098286 0.454468302768581
52.765692602843 4.36170230466568 0.481669441788406
52.7859162185341 4.57446827074693 0.493277599565779
52.8061398342252 4.46808528770631 0.487508072438874
52.8263634499162 4.89361721986881 0.510194863610278
52.8465870656073 3.93617037250317 0.457570511496874
52.8668106812984 5.21276616899069 0.526568900976162
52.8870342969894 4.30851081314537 0.478723423682818
52.9072579126805 5.31914915203132 0.531914915203132
52.9274815283716 5.00000020290944 0.515710644057907
52.9477051440626 4.52127677922662 0.490401320821245
52.9679287597537 5.21276616899069 0.526568900976162
52.9881523754448 3.45744694882036 0.428843514653201
53.0083759911358 4.57446827074693 0.493277599565779
53.0285996068269 4.78723423682818 0.504618796037166
53.048823222518 4.09574484706411 0.466753443803018
53.069046838209 5.21276616899069 0.526568900976162
53.0892704539001 4.73404274530787 0.501807527388583
53.1094940695912 4.46808528770631 0.487508072438874
53.1297176852822 4.68085125378756 0.498980420230782
53.1499413009733 4.73404274530787 0.501807527388583
53.1701649166644 4.09574484706411 0.466753443803018
53.1903885323554 4.89361721986881 0.510194863610278
53.2106121480465 5.10638318595006 0.521168051529382
53.2308357637376 4.94680871138912 0.512960167678218
53.2510593794286 4.68085125378756 0.498980420230782
53.2712829951197 4.8404257283485 0.507414489430638
53.2915066108108 5.15957467747038 0.523875436249008
53.3117302265018 5.05319169442975 0.518446528742142
53.3319538421929 4.94680871138912 0.512960167678218
53.352177457884 4.52127677922662 0.490401320821245
53.372401073575 3.98936186402349 0.460651829217758
53.3926246892661 4.46808528770631 0.487508072438874
53.4128483049572 4.57446827074693 0.493277599565779
53.4330719206482 4.30851081314537 0.478723423682818
53.4532955363393 4.57446827074693 0.493277599565779
53.4735191520303 4.09574484706411 0.466753443803018
53.4937427677214 3.56382993186098 0.435391122555825
53.5139663834125 5.37234064355163 0.534567873881054
53.5341899991035 4.89361721986881 0.510194863610278
53.5544136147946 4.57446827074693 0.493277599565779
53.5746372304857 4.73404274530787 0.501807527388583
53.5948608461767 4.8404257283485 0.507414489430638
53.6150844618678 3.98936186402349 0.460651829217758
53.6353080775589 5.10638318595006 0.521168051529382
53.6555316932499 4.52127677922662 0.490401320821245
53.675755308941 4.46808528770631 0.487508072438874
53.6959789246321 4.41489379618599 0.48459755047143
53.7162025403231 5.265957660511 0.529248658236749
53.7364261560142 5.21276616899069 0.526568900976162
53.7566497717053 4.20212783010474 0.472776317979537
53.7768733873963 4.30851081314537 0.478723423682818
53.7970970030874 4.20212783010474 0.472776317979537
53.8173206187785 4.52127677922662 0.490401320821245
53.8375442344695 4.62765976226725 0.49613720380912
53.8577678501606 4.52127677922662 0.490401320821245
53.8779914658517 5.15957467747038 0.523875436249008
53.8982150815427 4.94680871138912 0.512960167678218
53.9184386972338 3.98936186402349 0.460651829217758
53.9386623129249 4.78723423682818 0.504618796037166
53.9588859286159 5.21276616899069 0.526568900976162
53.979109544307 4.30851081314537 0.478723423682818
53.9993331599981 4.57446827074693 0.493277599565779
54.0195567756891 4.68085125378756 0.498980420230782
54.0397803913802 4.36170230466568 0.481669441788406
54.0600040070713 4.20212783010474 0.472776317979537
54.0802276227623 4.09574484706411 0.466753443803018
54.1004512384534 5.15957467747038 0.523875436249008
54.1206748541445 4.68085125378756 0.498980420230782
54.1408984698355 4.68085125378756 0.498980420230782
54.1611220855266 4.46808528770631 0.487508072438874
54.1813457012177 4.20212783010474 0.472776317979537
54.2015693169087 3.6170214233813 0.438628275844795
54.2217929325998 4.62765976226725 0.49613720380912
54.2420165482908 5.00000020290944 0.515710644057907
54.2622401639819 4.20212783010474 0.472776317979537
54.282463779673 4.0425533555438 0.463712672386492
54.302687395364 4.68085125378756 0.498980420230782
54.3229110110551 4.73404274530787 0.501807527388583
54.3431346267462 4.46808528770631 0.487508072438874
54.3633582424372 3.93617037250317 0.457570511496874
54.3835818581283 3.56382993186098 0.435391122555825
54.4038054738194 4.68085125378756 0.498980420230782
54.4240290895104 4.14893633858443 0.469774533230711
54.4442527052015 4.73404274530787 0.501807527388583
54.4644763208926 3.82978738946255 0.451344772265282
54.4846999365836 4.94680871138912 0.512960167678218
54.5049235522747 4.52127677922662 0.490401320821245
54.5251471679658 4.62765976226725 0.49613720380912
54.5453707836568 3.93617037250317 0.457570511496874
54.5655943993479 4.0425533555438 0.463712672386492
54.585818015039 4.57446827074693 0.493277599565779
54.60604163073 3.72340440642192 0.445031947067723
54.6262652464211 4.25531932162505 0.475759163456095
54.6464888621122 4.20212783010474 0.472776317979537
54.6667124778032 4.46808528770631 0.487508072438874
54.6869360934943 3.82978738946255 0.451344772265282
54.7071597091854 4.09574484706411 0.466753443803018
54.7273833248764 4.36170230466568 0.481669441788406
54.7476069405675 3.51063844034067 0.432129719910892
54.7678305562586 4.09574484706411 0.466753443803018
54.7880541719496 4.30851081314537 0.478723423682818
54.8082777876407 4.68085125378756 0.498980420230782
54.8285014033318 4.68085125378756 0.498980420230782
54.8487250190228 4.30851081314537 0.478723423682818
54.8689486347139 3.88297888098286 0.454468302768581
54.889172250405 3.82978738946255 0.451344772265282
54.909395866096 4.94680871138912 0.512960167678218
54.9296194817871 3.98936186402349 0.460651829217758
54.9498430974782 4.0425533555438 0.463712672386492
54.9700667131692 4.14893633858443 0.469774533230711
54.9902903288603 4.20212783010474 0.472776317979537
55.0105139445513 4.0425533555438 0.463712672386492
55.0307375602424 3.67021291490161 0.441841712766838
55.0509611759335 4.20212783010474 0.472776317979537
55.0711847916245 4.78723423682818 0.504618796037166
55.0914084073156 4.14893633858443 0.469774533230711
55.1116320230067 4.52127677922662 0.490401320821245
55.1318556386977 4.46808528770631 0.487508072438874
55.1520792543888 4.20212783010474 0.472776317979537
55.1723028700799 3.77659589794223 0.448199474208799
55.1925264857709 4.41489379618599 0.48459755047143
55.212750101462 4.8404257283485 0.507414489430638
55.2329737171531 4.0425533555438 0.463712672386492
55.2531973328441 3.51063844034067 0.432129719910892
55.2734209485352 3.77659589794223 0.448199474208799
55.2936445642263 3.56382993186098 0.435391122555825
55.3138681799173 3.2446809827391 0.415438829407517
55.3340917956084 3.67021291490161 0.441841712766838
55.3543154112995 3.98936186402349 0.460651829217758
55.3745390269905 3.82978738946255 0.451344772265282
55.3947626426816 3.88297888098286 0.454468302768581
55.4149862583727 3.56382993186098 0.435391122555825
55.4352098740637 4.36170230466568 0.481669441788406
55.4554334897548 4.46808528770631 0.487508072438874
55.4756571054459 4.30851081314537 0.478723423682818
55.4958807211369 4.20212783010474 0.472776317979537
55.516104336828 3.72340440642192 0.445031947067723
55.5363279525191 3.93617037250317 0.457570511496874
55.5565515682101 3.35106396577973 0.422194375282049
55.5767751839012 3.77659589794223 0.448199474208799
55.5969987995923 4.41489379618599 0.48459755047143
55.6172224152833 3.88297888098286 0.454468302768581
55.6374460309744 4.14893633858443 0.469774533230711
55.6576696466655 4.41489379618599 0.48459755047143
55.6778932623565 3.98936186402349 0.460651829217758
55.6981168780476 3.77659589794223 0.448199474208799
55.7183404937387 4.14893633858443 0.469774533230711
55.7385641094297 3.98936186402349 0.460651829217758
55.7587877251208 4.46808528770631 0.487508072438874
55.7790113408118 4.57446827074693 0.493277599565779
55.7992349565029 4.46808528770631 0.487508072438874
55.819458572194 4.0425533555438 0.463712672386492
55.839682187885 5.10638318595006 0.521168051529382
55.8599058035761 4.68085125378756 0.498980420230782
55.8801294192672 3.72340440642192 0.445031947067723
55.9003530349582 4.52127677922662 0.490401320821245
55.9205766506493 3.82978738946255 0.451344772265282
55.9408002663404 3.98936186402349 0.460651829217758
55.9610238820314 4.09574484706411 0.466753443803018
55.9812474977225 4.25531932162505 0.475759163456095
56.0014711134136 5.00000020290944 0.515710644057907
56.0216947291046 3.6170214233813 0.438628275844795
56.0419183447957 4.0425533555438 0.463712672386492
56.0621419604868 4.52127677922662 0.490401320821245
56.0823655761778 4.09574484706411 0.466753443803018
56.1025891918689 3.56382993186098 0.435391122555825
56.12281280756 3.88297888098286 0.454468302768581
56.143036423251 4.09574484706411 0.466753443803018
56.1632600389421 4.52127677922662 0.490401320821245
56.1834836546332 3.67021291490161 0.441841712766838
56.2037072703242 3.88297888098286 0.454468302768581
56.2239308860153 3.6170214233813 0.438628275844795
56.2441545017064 3.40425545730004 0.425531932162505
56.2643781173974 4.09574484706411 0.466753443803018
56.2846017330885 4.0425533555438 0.463712672386492
56.3048253487796 4.25531932162505 0.475759163456095
56.3250489644706 3.98936186402349 0.460651829217758
56.3452725801617 4.09574484706411 0.466753443803018
56.3654961958528 4.46808528770631 0.487508072438874
56.3857198115438 4.36170230466568 0.481669441788406
56.4059434272349 3.98936186402349 0.460651829217758
56.426167042926 5.10638318595006 0.521168051529382
56.446390658617 4.09574484706411 0.466753443803018
56.4666142743081 4.25531932162505 0.475759163456095
56.4868378899992 3.98936186402349 0.460651829217758
56.5070615056902 4.0425533555438 0.463712672386492
56.5272851213813 3.72340440642192 0.445031947067723
56.5475087370723 3.67021291490161 0.441841712766838
56.5677323527634 4.68085125378756 0.498980420230782
56.5879559684545 3.82978738946255 0.451344772265282
56.6081795841455 4.62765976226725 0.49613720380912
56.6284031998366 4.46808528770631 0.487508072438874
56.6486268155277 4.14893633858443 0.469774533230711
56.6688504312187 3.67021291490161 0.441841712766838
56.6890740469098 4.30851081314537 0.478723423682818
56.7092976626009 3.88297888098286 0.454468302768581
56.7295212782919 4.52127677922662 0.490401320821245
56.749744893983 3.77659589794223 0.448199474208799
56.7699685096741 4.25531932162505 0.475759163456095
56.7901921253651 4.30851081314537 0.478723423682818
56.8104157410562 5.10638318595006 0.521168051529382
56.8306393567473 4.14893633858443 0.469774533230711
56.8508629724383 4.25531932162505 0.475759163456095
56.8710865881294 4.68085125378756 0.498980420230782
56.8913102038205 3.72340440642192 0.445031947067723
56.9115338195115 5.10638318595006 0.521168051529382
56.9317574352026 4.73404274530787 0.501807527388583
56.9519810508937 4.46808528770631 0.487508072438874
56.9722046665847 4.30851081314537 0.478723423682818
56.9924282822758 3.77659589794223 0.448199474208799
57.0126518979669 4.68085125378756 0.498980420230782
57.0328755136579 3.98936186402349 0.460651829217758
57.053099129349 3.77659589794223 0.448199474208799
57.0733227450401 3.72340440642192 0.445031947067723
57.0935463607311 4.89361721986881 0.510194863610278
57.1137699764222 4.0425533555438 0.463712672386492
57.1339935921133 3.67021291490161 0.441841712766838
57.1542172078043 4.73404274530787 0.501807527388583
57.1744408234954 4.94680871138912 0.512960167678218
57.1946644391865 4.89361721986881 0.510194863610278
57.2148880548775 4.25531932162505 0.475759163456095
57.2351116705686 4.14893633858443 0.469774533230711
57.2553352862597 4.73404274530787 0.501807527388583
57.2755589019507 4.25531932162505 0.475759163456095
57.2957825176418 4.36170230466568 0.481669441788406
57.3160061333328 4.46808528770631 0.487508072438874
57.3362297490239 5.05319169442975 0.518446528742142
57.356453364715 4.94680871138912 0.512960167678218
57.376676980406 4.89361721986881 0.510194863610278
57.3969005960971 4.62765976226725 0.49613720380912
57.4171242117882 4.41489379618599 0.48459755047143
57.4373478274792 3.72340440642192 0.445031947067723
57.4575714431703 4.78723423682818 0.504618796037166
57.4777950588614 4.62765976226725 0.49613720380912
57.4980186745524 4.62765976226725 0.49613720380912
57.5182422902435 4.52127677922662 0.490401320821245
57.5384659059346 4.78723423682818 0.504618796037166
57.5586895216256 4.14893633858443 0.469774533230711
57.5789131373167 5.53191511811257 0.542448906438364
57.5991367530078 3.98936186402349 0.460651829217758
57.6193603686988 4.0425533555438 0.463712672386492
57.6395839843899 4.41489379618599 0.48459755047143
57.659807600081 3.82978738946255 0.451344772265282
57.680031215772 4.20212783010474 0.472776317979537
57.7002548314631 4.0425533555438 0.463712672386492
57.7204784471542 5.58510660963288 0.545050594776606
57.7407020628452 3.93617037250317 0.457570511496874
57.7609256785363 5.265957660511 0.529248658236749
57.7811492942274 5.00000020290944 0.515710644057907
57.8013729099184 4.0425533555438 0.463712672386492
57.8215965256095 4.57446827074693 0.493277599565779
57.8418201413006 3.2446809827391 0.415438829407517
57.8620437569916 4.46808528770631 0.487508072438874
57.8822673726827 4.20212783010474 0.472776317979537
57.9024909883738 4.41489379618599 0.48459755047143
57.9227146040648 3.82978738946255 0.451344772265282
57.9429382197559 3.77659589794223 0.448199474208799
57.963161835447 3.51063844034067 0.432129719910892
57.983385451138 3.93617037250317 0.457570511496874
58.0036090668291 4.0425533555438 0.463712672386492
58.0238326825202 3.77659589794223 0.448199474208799
58.0440562982112 3.45744694882036 0.428843514653201
58.0642799139023 4.36170230466568 0.481669441788406
58.0845035295933 3.82978738946255 0.451344772265282
58.1047271452844 3.82978738946255 0.451344772265282
58.1249507609755 3.98936186402349 0.460651829217758
58.1451743766665 4.30851081314537 0.478723423682818
58.1653979923576 4.30851081314537 0.478723423682818
58.1856216080487 3.40425545730004 0.425531932162505
58.2058452237397 3.93617037250317 0.457570511496874
58.2260688394308 3.51063844034067 0.432129719910892
58.2462924551219 3.51063844034067 0.432129719910892
58.2665160708129 3.45744694882036 0.428843514653201
58.286739686504 3.98936186402349 0.460651829217758
58.3069633021951 4.36170230466568 0.481669441788406
58.3271869178861 3.72340440642192 0.445031947067723
58.3474105335772 3.77659589794223 0.448199474208799
58.3676341492683 4.0425533555438 0.463712672386492
58.3878577649593 3.29787247425942 0.418830223061378
58.4080813806504 4.14893633858443 0.469774533230711
58.4283049963415 3.45744694882036 0.428843514653201
58.4485286120325 3.51063844034067 0.432129719910892
58.4687522277236 3.93617037250317 0.457570511496874
58.4889758434147 3.08510650817816 0.405094330581189
58.5091994591057 4.46808528770631 0.487508072438874
58.5294230747968 4.30851081314537 0.478723423682818
58.5496466904879 4.20212783010474 0.472776317979537
58.5698703061789 3.77659589794223 0.448199474208799
58.59009392187 3.88297888098286 0.454468302768581
58.6103175375611 4.57446827074693 0.493277599565779
58.6305411532521 3.6170214233813 0.438628275844795
58.6507647689432 3.56382993186098 0.435391122555825
58.6709883846343 4.09574484706411 0.466753443803018
58.6912120003253 3.77659589794223 0.448199474208799
58.7114356160164 4.46808528770631 0.487508072438874
58.7316592317075 4.57446827074693 0.493277599565779
58.7518828473985 4.73404274530787 0.501807527388583
58.7721064630896 3.77659589794223 0.448199474208799
58.7923300787807 5.00000020290944 0.515710644057907
58.8125536944717 3.72340440642192 0.445031947067723
58.8327773101628 4.89361721986881 0.510194863610278
58.8530009258538 3.98936186402349 0.460651829217758
58.8732245415449 4.41489379618599 0.48459755047143
58.893448157236 3.67021291490161 0.441841712766838
58.913671772927 4.52127677922662 0.490401320821245
58.9338953886181 3.40425545730004 0.425531932162505
58.9541190043092 4.09574484706411 0.466753443803018
58.9743426200002 3.77659589794223 0.448199474208799
58.9945662356913 3.98936186402349 0.460651829217758
59.0147898513824 3.72340440642192 0.445031947067723
59.0350134670734 4.14893633858443 0.469774533230711
59.0552370827645 3.19148949121879 0.412019521636212
59.0754606984556 4.14893633858443 0.469774533230711
59.0956843141466 3.93617037250317 0.457570511496874
59.1159079298377 3.88297888098286 0.454468302768581
59.1361315455288 4.30851081314537 0.478723423682818
59.1563551612198 4.09574484706411 0.466753443803018
59.1765787769109 4.30851081314537 0.478723423682818
59.196802392602 3.82978738946255 0.451344772265282
59.217026008293 3.35106396577973 0.422194375282049
59.2372496239841 4.41489379618599 0.48459755047143
59.2574732396752 4.14893633858443 0.469774533230711
59.2776968553662 3.45744694882036 0.428843514653201
59.2979204710573 4.14893633858443 0.469774533230711
59.3181440867484 3.72340440642192 0.445031947067723
59.3383677024394 4.52127677922662 0.490401320821245
59.3585913181305 4.25531932162505 0.475759163456095
59.3788149338216 4.41489379618599 0.48459755047143
59.3990385495126 4.25531932162505 0.475759163456095
59.4192621652037 3.51063844034067 0.432129719910892
59.4394857808948 4.36170230466568 0.481669441788406
59.4597093965858 3.56382993186098 0.435391122555825
59.4799330122769 3.67021291490161 0.441841712766838
59.500156627968 4.30851081314537 0.478723423682818
59.520380243659 4.25531932162505 0.475759163456095
59.5406038593501 3.93617037250317 0.457570511496874
59.5608274750412 3.19148949121879 0.412019521636212
59.5810510907322 3.67021291490161 0.441841712766838
59.6012747064233 3.6170214233813 0.438628275844795
59.6214983221143 4.52127677922662 0.490401320821245
59.6417219378054 3.19148949121879 0.412019521636212
59.6619455534965 4.09574484706411 0.466753443803018
59.6821691691875 4.25531932162505 0.475759163456095
59.7023927848786 4.0425533555438 0.463712672386492
59.7226164005697 4.20212783010474 0.472776317979537
59.7428400162607 3.98936186402349 0.460651829217758
59.7630636319518 4.25531932162505 0.475759163456095
59.7832872476429 4.52127677922662 0.490401320821245
59.8035108633339 3.93617037250317 0.457570511496874
59.823734479025 4.14893633858443 0.469774533230711
59.8439580947161 3.29787247425942 0.418830223061378
59.8641817104071 4.0425533555438 0.463712672386492
59.8844053260982 3.88297888098286 0.454468302768581
59.9046289417893 3.45744694882036 0.428843514653201
59.9248525574803 3.51063844034067 0.432129719910892
59.9450761731714 3.98936186402349 0.460651829217758
59.9652997888625 3.03191501665785 0.401586954343472
59.9855234045535 3.72340440642192 0.445031947067723
60.0057470202446 3.08510650817816 0.405094330581189
60.0259706359357 3.72340440642192 0.445031947067723
60.0461942516267 3.77659589794223 0.448199474208799
60.0664178673178 3.51063844034067 0.432129719910892
60.0866414830089 3.72340440642192 0.445031947067723
60.1068650986999 4.52127677922662 0.490401320821245
60.127088714391 3.72340440642192 0.445031947067723
60.1473123300821 3.93617037250317 0.457570511496874
60.1675359457731 3.19148949121879 0.412019521636212
60.1877595614642 3.29787247425942 0.418830223061378
60.2079831771553 4.09574484706411 0.466753443803018
60.2282067928463 3.98936186402349 0.460651829217758
60.2484304085374 3.6170214233813 0.438628275844795
60.2686540242285 3.67021291490161 0.441841712766838
60.2888776399195 3.93617037250317 0.457570511496874
60.3091012556106 3.45744694882036 0.428843514653201
60.3293248713017 4.57446827074693 0.493277599565779
60.3495484869927 3.67021291490161 0.441841712766838
60.3697721026838 3.98936186402349 0.460651829217758
60.3899957183748 3.51063844034067 0.432129719910892
60.4102193340659 4.52127677922662 0.490401320821245
60.430442949757 3.82978738946255 0.451344772265282
60.450666565448 3.88297888098286 0.454468302768581
60.4708901811391 4.09574484706411 0.466753443803018
60.4911137968302 4.36170230466568 0.481669441788406
60.5113374125212 3.08510650817816 0.405094330581189
60.5315610282123 3.72340440642192 0.445031947067723
60.5517846439034 3.88297888098286 0.454468302768581
60.5720082595944 3.77659589794223 0.448199474208799
60.5922318752855 4.14893633858443 0.469774533230711
60.6124554909766 3.6170214233813 0.438628275844795
60.6326791066676 3.93617037250317 0.457570511496874
60.6529027223587 3.67021291490161 0.441841712766838
60.6731263380498 4.41489379618599 0.48459755047143
60.6933499537408 3.40425545730004 0.425531932162505
60.7135735694319 3.51063844034067 0.432129719910892
60.733797185123 3.56382993186098 0.435391122555825
60.754020800814 4.52127677922662 0.490401320821245
60.7742444165051 4.25531932162505 0.475759163456095
60.7944680321962 3.40425545730004 0.425531932162505
60.8146916478872 3.72340440642192 0.445031947067723
60.8349152635783 3.2446809827391 0.415438829407517
60.8551388792694 3.08510650817816 0.405094330581189
60.8753624949604 3.13829799969848 0.408571598914043
60.8955861106515 2.8191490505766 0.387239903442613
60.9158097263426 3.13829799969848 0.408571598914043
60.9360333420336 3.98936186402349 0.460651829217758
60.9562569577247 3.40425545730004 0.425531932162505
60.9764805734158 4.89361721986881 0.510194863610278
60.9967041891068 3.93617037250317 0.457570511496874
61.0169278047979 4.30851081314537 0.478723423682818
61.037151420489 3.72340440642192 0.445031947067723
61.05737503618 4.30851081314537 0.478723423682818
61.0775986518711 4.46808528770631 0.487508072438874
61.0978222675622 3.77659589794223 0.448199474208799
61.1180458832532 3.72340440642192 0.445031947067723
61.1382694989443 3.82978738946255 0.451344772265282
61.1584931146353 3.45744694882036 0.428843514653201
61.1787167303264 3.93617037250317 0.457570511496874
61.1989403460175 4.25531932162505 0.475759163456095
61.2191639617085 3.93617037250317 0.457570511496874
61.2393875773996 3.77659589794223 0.448199474208799
61.2596111930907 4.14893633858443 0.469774533230711
61.2798348087817 3.98936186402349 0.460651829217758
61.3000584244728 3.35106396577973 0.422194375282049
61.3202820401639 4.09574484706411 0.466753443803018
61.3405056558549 4.0425533555438 0.463712672386492
61.360729271546 4.52127677922662 0.490401320821245
61.3809528872371 3.98936186402349 0.460651829217758
61.4011765029281 3.82978738946255 0.451344772265282
61.4214001186192 3.6170214233813 0.438628275844795
61.4416237343103 4.68085125378756 0.498980420230782
61.4618473500013 3.6170214233813 0.438628275844795
61.4820709656924 3.77659589794223 0.448199474208799
61.5022945813835 3.72340440642192 0.445031947067723
61.5225181970745 3.88297888098286 0.454468302768581
61.5427418127656 3.29787247425942 0.418830223061378
61.5629654284567 3.98936186402349 0.460651829217758
61.5831890441477 3.45744694882036 0.428843514653201
61.6034126598388 3.98936186402349 0.460651829217758
61.6236362755299 3.88297888098286 0.454468302768581
61.6438598912209 3.77659589794223 0.448199474208799
61.664083506912 3.98936186402349 0.460651829217758
61.6843071226031 3.40425545730004 0.425531932162505
61.7045307382941 3.88297888098286 0.454468302768581
61.7247543539852 3.93617037250317 0.457570511496874
61.7449779696763 3.29787247425942 0.418830223061378
61.7652015853673 3.67021291490161 0.441841712766838
61.7854252010584 3.40425545730004 0.425531932162505
61.8056488167495 4.57446827074693 0.493277599565779
61.8258724324405 4.36170230466568 0.481669441788406
61.8460960481316 3.29787247425942 0.418830223061378
61.8663196638227 3.72340440642192 0.445031947067723
61.8865432795137 3.40425545730004 0.425531932162505
61.9067668952048 4.09574484706411 0.466753443803018
61.9269905108958 3.56382993186098 0.435391122555825
61.9472141265869 3.98936186402349 0.460651829217758
61.967437742278 3.45744694882036 0.428843514653201
61.987661357969 3.77659589794223 0.448199474208799
62.0078849736601 3.88297888098286 0.454468302768581
62.0281085893512 3.72340440642192 0.445031947067723
62.0483322050422 3.35106396577973 0.422194375282049
62.0685558207333 3.45744694882036 0.428843514653201
62.0887794364244 3.98936186402349 0.460651829217758
62.1090030521154 4.0425533555438 0.463712672386492
62.1292266678065 3.93617037250317 0.457570511496874
62.1494502834976 3.35106396577973 0.422194375282049
62.1696738991886 3.19148949121879 0.412019521636212
62.1898975148797 3.77659589794223 0.448199474208799
62.2101211305708 4.25531932162505 0.475759163456095
62.2303447462618 4.20212783010474 0.472776317979537
62.2505683619529 3.56382993186098 0.435391122555825
62.270791977644 3.6170214233813 0.438628275844795
62.291015593335 4.36170230466568 0.481669441788406
62.3112392090261 3.77659589794223 0.448199474208799
62.3314628247172 3.82978738946255 0.451344772265282
62.3516864404082 4.14893633858443 0.469774533230711
62.3719100560993 3.93617037250317 0.457570511496874
62.3921336717904 4.09574484706411 0.466753443803018
62.4123572874814 3.35106396577973 0.422194375282049
62.4325809031725 4.30851081314537 0.478723423682818
62.4528045188636 4.52127677922662 0.490401320821245
62.4730281345546 4.89361721986881 0.510194863610278
62.4932517502457 3.93617037250317 0.457570511496874
62.5134753659368 4.09574484706411 0.466753443803018
62.5336989816278 4.25531932162505 0.475759163456095
62.5539225973189 4.14893633858443 0.469774533230711
62.57414621301 4.14893633858443 0.469774533230711
62.594369828701 4.46808528770631 0.487508072438874
62.6145934443921 4.36170230466568 0.481669441788406
62.6348170600832 4.09574484706411 0.466753443803018
62.6550406757742 4.09574484706411 0.466753443803018
62.6752642914653 4.30851081314537 0.478723423682818
62.6954879071563 3.51063844034067 0.432129719910892
62.7157115228474 3.77659589794223 0.448199474208799
62.7359351385385 4.57446827074693 0.493277599565779
62.7561587542295 3.82978738946255 0.451344772265282
62.7763823699206 3.82978738946255 0.451344772265282
62.7966059856117 3.88297888098286 0.454468302768581
62.8168296013027 4.30851081314537 0.478723423682818
62.8370532169938 4.73404274530787 0.501807527388583
62.8572768326849 4.20212783010474 0.472776317979537
62.8775004483759 4.73404274530787 0.501807527388583
62.897724064067 4.14893633858443 0.469774533230711
62.9179476797581 5.05319169442975 0.518446528742142
62.9381712954491 4.68085125378756 0.498980420230782
62.9583949111402 5.05319169442975 0.518446528742142
62.9786185268313 4.14893633858443 0.469774533230711
62.9988421425223 3.88297888098286 0.454468302768581
63.0190657582134 3.88297888098286 0.454468302768581
63.0392893739045 3.93617037250317 0.457570511496874
63.0595129895955 4.25531932162505 0.475759163456095
63.0797366052866 4.73404274530787 0.501807527388583
63.0999602209777 4.46808528770631 0.487508072438874
63.1201838366687 4.73404274530787 0.501807527388583
63.1404074523598 3.77659589794223 0.448199474208799
63.1606310680509 4.14893633858443 0.469774533230711
63.1808546837419 3.51063844034067 0.432129719910892
63.201078299433 3.35106396577973 0.422194375282049
63.2213019151241 4.41489379618599 0.48459755047143
63.2415255308151 3.29787247425942 0.418830223061378
63.2617491465062 4.25531932162505 0.475759163456095
63.2819727621973 4.14893633858443 0.469774533230711
63.3021963778883 4.20212783010474 0.472776317979537
63.3224199935794 3.82978738946255 0.451344772265282
63.3426436092705 3.88297888098286 0.454468302768581
63.3628672249615 3.72340440642192 0.445031947067723
63.3830908406526 4.14893633858443 0.469774533230711
63.4033144563437 3.72340440642192 0.445031947067723
63.4235380720347 4.36170230466568 0.481669441788406
63.4437616877258 3.98936186402349 0.460651829217758
63.4639853034168 4.20212783010474 0.472776317979537
63.4842089191079 4.46808528770631 0.487508072438874
63.504432534799 3.40425545730004 0.425531932162505
63.52465615049 3.6170214233813 0.438628275844795
63.5448797661811 4.46808528770631 0.487508072438874
63.5651033818722 4.78723423682818 0.504618796037166
63.5853269975632 4.30851081314537 0.478723423682818
63.6055506132543 4.25531932162505 0.475759163456095
63.6257742289454 3.72340440642192 0.445031947067723
63.6459978446364 4.14893633858443 0.469774533230711
63.6662214603275 3.88297888098286 0.454468302768581
63.6864450760186 3.72340440642192 0.445031947067723
63.7066686917096 4.46808528770631 0.487508072438874
63.7268923074007 3.56382993186098 0.435391122555825
63.7471159230918 3.77659589794223 0.448199474208799
63.7673395387828 3.67021291490161 0.441841712766838
63.7875631544739 3.98936186402349 0.460651829217758
63.807786770165 4.30851081314537 0.478723423682818
63.828010385856 4.14893633858443 0.469774533230711
63.8482340015471 3.88297888098286 0.454468302768581
63.8684576172382 4.09574484706411 0.466753443803018
63.8886812329292 3.19148949121879 0.412019521636212
63.9089048486203 3.35106396577973 0.422194375282049
63.9291284643114 3.03191501665785 0.401586954343472
63.9493520800024 3.19148949121879 0.412019521636212
63.9695756956935 4.14893633858443 0.469774533230711
63.9897993113846 3.98936186402349 0.460651829217758
64.0100229270756 2.92553203361722 0.394478658939308
64.0302465427667 3.67021291490161 0.441841712766838
64.0504701584578 4.57446827074693 0.493277599565779
64.0706937741488 3.6170214233813 0.438628275844795
64.0909173898399 4.14893633858443 0.469774533230711
64.111141005531 3.2446809827391 0.415438829407517
64.131364621222 3.19148949121879 0.412019521636212
64.1515882369131 3.13829799969848 0.408571598914043
64.1718118526042 3.77659589794223 0.448199474208799
64.1920354682952 2.92553203361722 0.394478658939308
64.2122590839863 3.40425545730004 0.425531932162505
64.2324826996773 3.93617037250317 0.457570511496874
64.2527063153684 3.6170214233813 0.438628275844795
64.2729299310595 3.2446809827391 0.415438829407517
64.2931535467505 3.29787247425942 0.418830223061378
64.3133771624416 3.2446809827391 0.415438829407517
64.3336007781327 3.45744694882036 0.428843514653201
64.3538243938237 3.40425545730004 0.425531932162505
64.3740480095148 3.93617037250317 0.457570511496874
64.3942716252059 3.45744694882036 0.428843514653201
64.4144952408969 3.51063844034067 0.432129719910892
64.434718856588 3.45744694882036 0.428843514653201
64.4549424722791 3.2446809827391 0.415438829407517
64.4751660879701 4.14893633858443 0.469774533230711
64.4953897036612 2.97872352513754 0.398048674321006
64.5156133193523 3.82978738946255 0.451344772265282
64.5358369350433 3.88297888098286 0.454468302768581
64.5560605507344 3.93617037250317 0.457570511496874
64.5762841664255 3.45744694882036 0.428843514653201
64.5965077821165 3.72340440642192 0.445031947067723
64.6167313978076 2.50000010145472 0.364662493543428
64.6369550134987 3.6170214233813 0.438628275844795
64.6571786291897 4.14893633858443 0.469774533230711
64.6774022448808 2.97872352513754 0.398048674321006
64.6976258605719 3.56382993186098 0.435391122555825
64.7178494762629 2.76595755905628 0.383569300189794
64.738073091954 3.56382993186098 0.435391122555825
64.7582967076451 3.40425545730004 0.425531932162505
64.7785203233361 3.08510650817816 0.405094330581189
64.7987439390272 3.2446809827391 0.415438829407517
64.8189675547183 3.56382993186098 0.435391122555825
64.8391911704093 3.08510650817816 0.405094330581189
64.8594147861004 3.56382993186098 0.435391122555825
64.8796384017915 3.29787247425942 0.418830223061378
64.8998620174825 3.56382993186098 0.435391122555825
64.9200856331736 3.45744694882036 0.428843514653201
64.9403092488647 3.19148949121879 0.412019521636212
64.9605328645557 3.51063844034067 0.432129719910892
64.9807564802468 2.65957457601566 0.376120643554402
65.0009800959378 3.72340440642192 0.445031947067723
65.0212037116289 3.51063844034067 0.432129719910892
65.04142732732 3.82978738946255 0.451344772265282
65.061650943011 3.45744694882036 0.428843514653201
65.0818745587021 2.92553203361722 0.394478658939308
65.1020981743932 3.45744694882036 0.428843514653201
65.1223217900842 3.98936186402349 0.460651829217758
65.1425454057753 3.72340440642192 0.445031947067723
65.1627690214664 3.51063844034067 0.432129719910892
65.1829926371574 3.19148949121879 0.412019521636212
65.2032162528485 2.87234054209691 0.390876038647036
65.2234398685396 3.82978738946255 0.451344772265282
65.2436634842306 2.87234054209691 0.390876038647036
65.2638870999217 3.56382993186098 0.435391122555825
65.2841107156128 3.19148949121879 0.412019521636212
65.3043343313038 2.92553203361722 0.394478658939308
65.3245579469949 2.71276606753597 0.37986322969976
65.344781562686 3.19148949121879 0.412019521636212
65.365005178377 3.08510650817816 0.405094330581189
65.3852287940681 2.39361711841409 0.356819372592072
65.4054524097592 3.51063844034067 0.432129719910892
65.4256760254502 3.40425545730004 0.425531932162505
65.4458996411413 3.08510650817816 0.405094330581189
65.4661232568324 3.6170214233813 0.438628275844795
65.4863468725234 3.35106396577973 0.422194375282049
65.5065704882145 4.25531932162505 0.475759163456095
65.5267941039056 3.67021291490161 0.441841712766838
65.5470177195966 2.76595755905628 0.383569300189794
65.5672413352877 3.2446809827391 0.415438829407517
65.5874649509788 2.97872352513754 0.398048674321006
65.6076885666698 3.29787247425942 0.418830223061378
65.6279121823609 3.2446809827391 0.415438829407517
65.648135798052 3.19148949121879 0.412019521636212
65.668359413743 3.13829799969848 0.408571598914043
65.6885830294341 3.98936186402349 0.460651829217758
65.7088066451252 2.87234054209691 0.390876038647036
65.7290302608162 3.40425545730004 0.425531932162505
65.7492538765073 3.72340440642192 0.445031947067723
65.7694774921983 3.40425545730004 0.425531932162505
65.7897011078894 2.76595755905628 0.383569300189794
65.8099247235805 3.19148949121879 0.412019521636212
65.8301483392715 2.65957457601566 0.376120643554402
65.8503719549626 2.87234054209691 0.390876038647036
65.8705955706537 2.92553203361722 0.394478658939308
65.8908191863447 2.71276606753597 0.37986322969976
65.9110428020358 3.2446809827391 0.415438829407517
65.9312664177269 3.2446809827391 0.415438829407517
65.9514900334179 3.51063844034067 0.432129719910892
65.971713649109 3.72340440642192 0.445031947067723
65.9919372648001 3.40425545730004 0.425531932162505
66.0121608804911 3.67021291490161 0.441841712766838
66.0323844961822 3.29787247425942 0.418830223061378
66.0526081118733 3.03191501665785 0.401586954343472
66.0728317275643 2.71276606753597 0.37986322969976
66.0930553432554 3.6170214233813 0.438628275844795
66.1132789589465 3.08510650817816 0.405094330581189
66.1335025746375 3.13829799969848 0.408571598914043
66.1537261903286 2.44680860993441 0.360762247785373
66.1739498060197 3.29787247425942 0.418830223061378
66.1941734217107 2.97872352513754 0.398048674321006
66.2143970374018 3.08510650817816 0.405094330581189
66.2346206530929 2.87234054209691 0.390876038647036
66.2548442687839 3.13829799969848 0.408571598914043
66.275067884475 3.13829799969848 0.408571598914043
66.2952915001661 2.92553203361722 0.394478658939308
66.3155151158571 2.65957457601566 0.376120643554402
66.3357387315482 2.60638308449535 0.372340440642192
66.3559623472393 3.2446809827391 0.415438829407517
66.3761859629303 3.72340440642192 0.445031947067723
66.3964095786214 3.40425545730004 0.425531932162505
66.4166331943125 2.55319159297503 0.368521463374206
66.4368568100035 3.51063844034067 0.432129719910892
66.4570804256946 3.51063844034067 0.432129719910892
66.4773040413857 2.87234054209691 0.390876038647036
66.4975276570767 2.8191490505766 0.387239903442613
66.5177512727678 2.76595755905628 0.383569300189794
66.5379748884588 3.67021291490161 0.441841712766838
66.5581985041499 3.29787247425942 0.418830223061378
66.578422119841 3.35106396577973 0.422194375282049
66.598645735532 3.35106396577973 0.422194375282049
66.6188693512231 2.76595755905628 0.383569300189794
66.6390929669142 3.03191501665785 0.401586954343472
66.6593165826052 2.97872352513754 0.398048674321006
66.6795401982963 3.2446809827391 0.415438829407517
66.6997638139874 3.72340440642192 0.445031947067723
66.7199874296784 3.51063844034067 0.432129719910892
66.7402110453695 2.76595755905628 0.383569300189794
66.7604346610606 2.8191490505766 0.387239903442613
66.7806582767516 2.71276606753597 0.37986322969976
66.8008818924427 3.2446809827391 0.415438829407517
66.8211055081338 3.45744694882036 0.428843514653201
66.8413291238248 3.35106396577973 0.422194375282049
66.8615527395159 3.40425545730004 0.425531932162505
66.881776355207 3.29787247425942 0.418830223061378
66.901999970898 4.20212783010474 0.472776317979537
66.9222235865891 3.29787247425942 0.418830223061378
66.9424472022802 3.35106396577973 0.422194375282049
66.9626708179712 3.67021291490161 0.441841712766838
66.9828944336623 3.19148949121879 0.412019521636212
67.0031180493534 3.40425545730004 0.425531932162505
67.0233416650444 3.03191501665785 0.401586954343472
67.0435652807355 3.29787247425942 0.418830223061378
67.0637888964266 3.29787247425942 0.418830223061378
67.0840125121176 3.03191501665785 0.401586954343472
67.1042361278087 3.13829799969848 0.408571598914043
67.1244597434998 3.08510650817816 0.405094330581189
67.1446833591908 2.55319159297503 0.368521463374206
67.1649069748819 3.98936186402349 0.460651829217758
67.185130590573 4.09574484706411 0.466753443803018
67.205354206264 2.87234054209691 0.390876038647036
67.2255778219551 3.2446809827391 0.415438829407517
67.2458014376462 2.92553203361722 0.394478658939308
67.2660250533372 2.76595755905628 0.383569300189794
67.2862486690283 3.51063844034067 0.432129719910892
67.3064722847193 3.35106396577973 0.422194375282049
67.3266959004104 2.8191490505766 0.387239903442613
67.3469195161015 3.08510650817816 0.405094330581189
67.3671431317925 3.77659589794223 0.448199474208799
67.3873667474836 3.6170214233813 0.438628275844795
67.4075903631747 3.08510650817816 0.405094330581189
67.4278139788657 3.03191501665785 0.401586954343472
67.4480375945568 2.97872352513754 0.398048674321006
67.4682612102479 3.56382993186098 0.435391122555825
67.4884848259389 2.97872352513754 0.398048674321006
67.50870844163 3.51063844034067 0.432129719910892
67.5289320573211 2.71276606753597 0.37986322969976
67.5491556730121 2.76595755905628 0.383569300189794
67.5693792887032 3.03191501665785 0.401586954343472
67.5896029043943 3.29787247425942 0.418830223061378
67.6098265200853 3.40425545730004 0.425531932162505
67.6300501357764 2.97872352513754 0.398048674321006
67.6502737514675 2.97872352513754 0.398048674321006
67.6704973671585 3.03191501665785 0.401586954343472
67.6907209828496 3.03191501665785 0.401586954343472
67.7109445985407 3.13829799969848 0.408571598914043
67.7311682142317 2.71276606753597 0.37986322969976
67.7513918299228 3.29787247425942 0.418830223061378
67.7716154456139 3.03191501665785 0.401586954343472
67.7918390613049 3.67021291490161 0.441841712766838
67.812062676996 3.51063844034067 0.432129719910892
67.8322862926871 2.8191490505766 0.387239903442613
67.8525099083781 2.97872352513754 0.398048674321006
67.8727335240692 2.8191490505766 0.387239903442613
67.8929571397603 3.2446809827391 0.415438829407517
67.9131807554513 2.92553203361722 0.394478658939308
67.9334043711424 2.71276606753597 0.37986322969976
67.9536279868335 2.50000010145472 0.364662493543428
67.9738516025245 2.65957457601566 0.376120643554402
67.9940752182156 3.29787247425942 0.418830223061378
68.0142988339067 2.87234054209691 0.390876038647036
68.0345224495977 2.97872352513754 0.398048674321006
68.0547460652888 3.72340440642192 0.445031947067723
68.0749696809798 2.8191490505766 0.387239903442613
68.0951932966709 2.44680860993441 0.360762247785373
68.115416912362 2.8191490505766 0.387239903442613
68.135640528053 2.87234054209691 0.390876038647036
68.1558641437441 3.6170214233813 0.438628275844795
68.1760877594352 3.56382993186098 0.435391122555825
68.1963113751262 2.65957457601566 0.376120643554402
68.2165349908173 2.92553203361722 0.394478658939308
68.2367586065084 3.03191501665785 0.401586954343472
68.2569822221994 3.51063844034067 0.432129719910892
68.2772058378905 3.56382993186098 0.435391122555825
68.2974294535816 3.29787247425942 0.418830223061378
68.3176530692726 3.08510650817816 0.405094330581189
68.3378766849637 2.8191490505766 0.387239903442613
68.3581003006548 3.19148949121879 0.412019521636212
68.3783239163458 2.87234054209691 0.390876038647036
68.3985475320369 3.19148949121879 0.412019521636212
68.418771147728 3.56382993186098 0.435391122555825
68.438994763419 2.65957457601566 0.376120643554402
68.4592183791101 3.2446809827391 0.415438829407517
68.4794419948012 3.03191501665785 0.401586954343472
68.4996656104922 2.97872352513754 0.398048674321006
68.5198892261833 2.44680860993441 0.360762247785373
68.5401128418744 2.87234054209691 0.390876038647036
68.5603364575654 2.8191490505766 0.387239903442613
68.5805600732565 3.93617037250317 0.457570511496874
68.6007836889476 2.60638308449535 0.372340440642192
68.6210073046386 3.13829799969848 0.408571598914043
68.6412309203297 3.13829799969848 0.408571598914043
68.6614545360208 3.08510650817816 0.405094330581189
68.6816781517118 2.55319159297503 0.368521463374206
68.7019017674029 3.35106396577973 0.422194375282049
68.722125383094 3.29787247425942 0.418830223061378
68.742348998785 2.65957457601566 0.376120643554402
68.7625726144761 3.08510650817816 0.405094330581189
68.7827962301672 2.28723413537347 0.348799935660385
68.8030198458582 3.29787247425942 0.418830223061378
68.8232434615493 2.87234054209691 0.390876038647036
68.8434670772403 3.08510650817816 0.405094330581189
68.8636906929314 2.92553203361722 0.394478658939308
68.8839143086225 4.09574484706411 0.466753443803018
68.9041379243135 2.71276606753597 0.37986322969976
68.9243615400046 2.87234054209691 0.390876038647036
68.9445851556957 3.03191501665785 0.401586954343472
68.9648087713867 3.03191501665785 0.401586954343472
68.9850323870778 2.71276606753597 0.37986322969976
69.0052560027689 2.71276606753597 0.37986322969976
69.0254796184599 2.71276606753597 0.37986322969976
69.045703234151 2.60638308449535 0.372340440642192
69.0659268498421 3.29787247425942 0.418830223061378
69.0861504655331 3.19148949121879 0.412019521636212
69.1063740812242 2.8191490505766 0.387239903442613
69.1265976969153 3.67021291490161 0.441841712766838
69.1468213126063 2.71276606753597 0.37986322969976
69.1670449282974 2.55319159297503 0.368521463374206
69.1872685439885 3.08510650817816 0.405094330581189
69.2074921596795 2.28723413537347 0.348799935660385
69.2277157753706 2.65957457601566 0.376120643554402
69.2479393910617 3.03191501665785 0.401586954343472
69.2681630067527 3.03191501665785 0.401586954343472
69.2883866224438 3.19148949121879 0.412019521636212
69.3086102381349 2.8191490505766 0.387239903442613
69.3288338538259 2.65957457601566 0.376120643554402
69.349057469517 3.2446809827391 0.415438829407517
69.3692810852081 3.6170214233813 0.438628275844795
69.3895047008991 2.50000010145472 0.364662493543428
69.4097283165902 2.92553203361722 0.394478658939308
69.4299519322813 2.65957457601566 0.376120643554402
69.4501755479723 3.98936186402349 0.460651829217758
69.4703991636634 3.08510650817816 0.405094330581189
69.4906227793545 2.71276606753597 0.37986322969976
69.5108463950455 3.13829799969848 0.408571598914043
69.5310700107366 3.29787247425942 0.418830223061378
69.5512936264277 2.71276606753597 0.37986322969976
69.5715172421187 2.12765966081253 0.336412530691444
69.5917408578098 2.60638308449535 0.372340440642192
69.6119644735008 3.03191501665785 0.401586954343472
69.6321880891919 2.55319159297503 0.368521463374206
69.652411704883 3.67021291490161 0.441841712766838
69.672635320574 2.44680860993441 0.360762247785373
69.6928589362651 3.08510650817816 0.405094330581189
69.7130825519562 2.55319159297503 0.368521463374206
69.7333061676472 2.55319159297503 0.368521463374206
69.7535297833383 2.8191490505766 0.387239903442613
69.7737533990294 3.82978738946255 0.451344772265282
69.7939770147204 2.97872352513754 0.398048674321006
69.8142006304115 2.97872352513754 0.398048674321006
69.8344242461026 2.71276606753597 0.37986322969976
69.8546478617936 2.65957457601566 0.376120643554402
69.8748714774847 2.60638308449535 0.372340440642192
69.8950950931758 2.65957457601566 0.376120643554402
69.9153187088668 2.76595755905628 0.383569300189794
69.9355423245579 3.03191501665785 0.401586954343472
69.955765940249 3.08510650817816 0.405094330581189
69.97598955594 2.07446816929221 0.332180758076181
69.9962131716311 2.92553203361722 0.394478658939308
70.0164367873222 3.2446809827391 0.415438829407517
70.0366604030132 3.13829799969848 0.408571598914043
70.0568840187043 2.65957457601566 0.376120643554402
70.0771076343954 3.13829799969848 0.408571598914043
70.0973312500864 2.50000010145472 0.364662493543428
70.1175548657775 3.2446809827391 0.415438829407517
70.1377784814686 2.65957457601566 0.376120643554402
70.1580020971596 2.60638308449535 0.372340440642192
70.1782257128507 2.87234054209691 0.390876038647036
70.1984493285418 3.45744694882036 0.428843514653201
70.2186729442328 2.71276606753597 0.37986322969976
70.2388965599239 3.19148949121879 0.412019521636212
70.259120175615 2.50000010145472 0.364662493543428
70.279343791306 2.60638308449535 0.372340440642192
70.2995674069971 2.76595755905628 0.383569300189794
70.3197910226882 2.92553203361722 0.394478658939308
70.3400146383792 2.71276606753597 0.37986322969976
70.3602382540703 3.51063844034067 0.432129719910892
70.3804618697613 2.76595755905628 0.383569300189794
70.4006854854524 2.60638308449535 0.372340440642192
70.4209091011435 3.03191501665785 0.401586954343472
70.4411327168345 2.65957457601566 0.376120643554402
70.4613563325256 2.76595755905628 0.383569300189794
70.4815799482167 2.71276606753597 0.37986322969976
70.5018035639077 3.19148949121879 0.412019521636212
70.5220271795988 2.71276606753597 0.37986322969976
70.5422507952899 2.8191490505766 0.387239903442613
70.5624744109809 3.13829799969848 0.408571598914043
70.582698026672 2.87234054209691 0.390876038647036
70.6029216423631 2.87234054209691 0.390876038647036
70.6231452580541 2.65957457601566 0.376120643554402
70.6433688737452 2.50000010145472 0.364662493543428
70.6635924894363 2.0212766777719 0.327894375166624
70.6838161051273 2.44680860993441 0.360762247785373
70.7040397208184 2.76595755905628 0.383569300189794
70.7242633365095 2.65957457601566 0.376120643554402
70.7444869522005 3.29787247425942 0.418830223061378
70.7647105678916 2.28723413537347 0.348799935660385
70.7849341835827 3.29787247425942 0.418830223061378
70.8051577992737 2.55319159297503 0.368521463374206
70.8253814149648 2.97872352513754 0.398048674321006
70.8456050306559 2.8191490505766 0.387239903442613
70.8658286463469 2.87234054209691 0.390876038647036
70.886052262038 2.71276606753597 0.37986322969976
70.9062758777291 2.12765966081253 0.336412530691444
70.9264994934201 2.60638308449535 0.372340440642192
70.9467231091112 2.65957457601566 0.376120643554402
70.9669467248023 3.29787247425942 0.418830223061378
70.9871703404933 2.50000010145472 0.364662493543428
71.0073939561844 2.50000010145472 0.364662493543428
71.0276175718755 2.87234054209691 0.390876038647036
71.0478411875665 2.71276606753597 0.37986322969976
71.0680648032576 2.50000010145472 0.364662493543428
71.0882884189487 2.97872352513754 0.398048674321006
71.1085120346397 2.34042562689378 0.352832438824499
71.1287356503308 3.19148949121879 0.412019521636212
71.1489592660218 3.13829799969848 0.408571598914043
71.1691828817129 3.35106396577973 0.422194375282049
71.189406497404 3.82978738946255 0.451344772265282
71.209630113095 3.40425545730004 0.425531932162505
71.2298537287861 2.87234054209691 0.390876038647036
71.2500773444772 2.71276606753597 0.37986322969976
71.2703009601682 3.03191501665785 0.401586954343472
71.2905245758593 3.08510650817816 0.405094330581189
71.3107481915504 2.65957457601566 0.376120643554402
71.3309718072414 2.65957457601566 0.376120643554402
71.3511954229325 2.71276606753597 0.37986322969976
71.3714190386236 2.92553203361722 0.394478658939308
71.3916426543146 2.44680860993441 0.360762247785373
71.4118662700057 3.03191501665785 0.401586954343472
71.4320898856968 2.39361711841409 0.356819372592072
71.4523135013878 3.13829799969848 0.408571598914043
71.4725371170789 2.8191490505766 0.387239903442613
71.49276073277 3.13829799969848 0.408571598914043
71.512984348461 2.71276606753597 0.37986322969976
71.5332079641521 3.2446809827391 0.415438829407517
71.5534315798432 2.87234054209691 0.390876038647036
71.5736551955342 2.55319159297503 0.368521463374206
71.5938788112253 2.76595755905628 0.383569300189794
71.6141024269164 2.60638308449535 0.372340440642192
71.6343260426074 3.03191501665785 0.401586954343472
71.6545496582985 3.13829799969848 0.408571598914043
71.6747732739896 2.50000010145472 0.364662493543428
71.6949968896806 3.08510650817816 0.405094330581189
71.7152205053717 2.23404264385315 0.34472026390471
71.7354441210628 3.2446809827391 0.415438829407517
71.7556677367538 2.34042562689378 0.352832438824499
71.7758913524449 2.71276606753597 0.37986322969976
71.796114968136 2.50000010145472 0.364662493543428
71.816338583827 2.92553203361722 0.394478658939308
71.8365621995181 2.71276606753597 0.37986322969976
71.8567858152092 2.76595755905628 0.383569300189794
71.8770094309002 3.40425545730004 0.425531932162505
71.8972330465913 3.08510650817816 0.405094330581189
71.9174566622823 2.8191490505766 0.387239903442613
71.9376802779734 2.71276606753597 0.37986322969976
71.9579038936645 2.8191490505766 0.387239903442613
71.9781275093555 2.71276606753597 0.37986322969976
71.9983511250466 2.65957457601566 0.376120643554402
72.0185747407377 2.12765966081253 0.336412530691444
72.0387983564287 2.65957457601566 0.376120643554402
72.0590219721198 3.19148949121879 0.412019521636212
72.0792455878109 2.12765966081253 0.336412530691444
72.0994692035019 2.87234054209691 0.390876038647036
72.119692819193 2.50000010145472 0.364662493543428
72.1399164348841 2.65957457601566 0.376120643554402
72.1601400505751 3.19148949121879 0.412019521636212
72.1803636662662 2.39361711841409 0.356819372592072
72.2005872819573 3.03191501665785 0.401586954343472
72.2208108976483 3.2446809827391 0.415438829407517
72.2410345133394 1.80851071169065 0.310157028270018
72.2612581290305 2.8191490505766 0.387239903442613
72.2814817447215 3.2446809827391 0.415438829407517
72.3017053604126 3.08510650817816 0.405094330581189
72.3219289761037 2.55319159297503 0.368521463374206
72.3421525917947 2.28723413537347 0.348799935660385
72.3623762074858 2.65957457601566 0.376120643554402
72.3825998231769 2.34042562689378 0.352832438824499
72.4028234388679 2.97872352513754 0.398048674321006
72.423047054559 2.71276606753597 0.37986322969976
72.4432706702501 2.71276606753597 0.37986322969976
72.4634942859411 3.08510650817816 0.405094330581189
72.4837179016322 3.2446809827391 0.415438829407517
72.5039415173233 2.76595755905628 0.383569300189794
72.5241651330143 2.28723413537347 0.348799935660385
72.5443887487054 2.39361711841409 0.356819372592072
72.5646123643965 2.60638308449535 0.372340440642192
72.5848359800875 2.12765966081253 0.336412530691444
72.6050595957786 3.35106396577973 0.422194375282049
72.6252832114697 2.34042562689378 0.352832438824499
72.6455068271607 2.76595755905628 0.383569300189794
72.6657304428518 2.44680860993441 0.360762247785373
72.6859540585428 3.03191501665785 0.401586954343472
72.7061776742339 2.8191490505766 0.387239903442613
72.726401289925 3.13829799969848 0.408571598914043
72.746624905616 2.87234054209691 0.390876038647036
72.7668485213071 2.44680860993441 0.360762247785373
72.7870721369982 2.8191490505766 0.387239903442613
72.8072957526892 2.23404264385315 0.34472026390471
72.8275193683803 2.60638308449535 0.372340440642192
72.8477429840714 2.87234054209691 0.390876038647036
72.8679665997624 2.23404264385315 0.34472026390471
72.8881902154535 3.67021291490161 0.441841712766838
72.9084138311446 2.39361711841409 0.356819372592072
72.9286374468356 2.65957457601566 0.376120643554402
72.9488610625267 2.92553203361722 0.394478658939308
72.9690846782178 2.39361711841409 0.356819372592072
72.9893082939088 2.92553203361722 0.394478658939308
73.0095319095999 2.50000010145472 0.364662493543428
73.029755525291 2.07446816929221 0.332180758076181
73.049979140982 2.97872352513754 0.398048674321006
73.0702027566731 2.76595755905628 0.383569300189794
73.0904263723642 2.8191490505766 0.387239903442613
73.1106499880552 2.55319159297503 0.368521463374206
73.1308736037463 2.65957457601566 0.376120643554402
73.1510972194374 3.08510650817816 0.405094330581189
73.1713208351284 2.44680860993441 0.360762247785373
73.1915444508195 2.55319159297503 0.368521463374206
73.2117680665106 3.2446809827391 0.415438829407517
73.2319916822016 2.60638308449535 0.372340440642192
73.2522152978927 2.8191490505766 0.387239903442613
73.2724389135838 2.71276606753597 0.37986322969976
73.2926625292748 2.8191490505766 0.387239903442613
73.3128861449659 2.18085115233284 0.340591728578921
73.333109760657 2.76595755905628 0.383569300189794
73.353333376348 2.55319159297503 0.368521463374206
73.3735569920391 2.92553203361722 0.394478658939308
73.3937806077302 2.71276606753597 0.37986322969976
73.4140042234212 2.71276606753597 0.37986322969976
73.4342278391123 2.55319159297503 0.368521463374206
73.4544514548033 3.19148949121879 0.412019521636212
73.4746750704944 2.65957457601566 0.376120643554402
73.4948986861855 2.97872352513754 0.398048674321006
73.5151223018765 2.28723413537347 0.348799935660385
73.5353459175676 2.92553203361722 0.394478658939308
73.5555695332587 2.23404264385315 0.34472026390471
73.5757931489497 2.76595755905628 0.383569300189794
73.5960167646408 2.23404264385315 0.34472026390471
73.6162403803319 2.0212766777719 0.327894375166624
73.6364639960229 2.76595755905628 0.383569300189794
73.656687611714 2.71276606753597 0.37986322969976
73.6769112274051 2.28723413537347 0.348799935660385
73.6971348430961 2.55319159297503 0.368521463374206
73.7173584587872 2.60638308449535 0.372340440642192
73.7375820744783 3.29787247425942 0.418830223061378
73.7578056901693 2.50000010145472 0.364662493543428
73.7780293058604 2.87234054209691 0.390876038647036
73.7982529215515 2.55319159297503 0.368521463374206
73.8184765372425 2.23404264385315 0.34472026390471
73.8387001529336 2.65957457601566 0.376120643554402
73.8589237686247 2.55319159297503 0.368521463374206
73.8791473843157 2.50000010145472 0.364662493543428
73.8993710000068 2.92553203361722 0.394478658939308
73.9195946156979 2.18085115233284 0.340591728578921
73.9398182313889 2.23404264385315 0.34472026390471
73.96004184708 2.55319159297503 0.368521463374206
73.9802654627711 2.50000010145472 0.364662493543428
74.0004890784621 3.2446809827391 0.415438829407517
74.0207126941532 2.34042562689378 0.352832438824499
74.0409363098443 2.39361711841409 0.356819372592072
74.0611599255353 2.87234054209691 0.390876038647036
74.0813835412264 2.92553203361722 0.394478658939308
74.1016071569175 2.76595755905628 0.383569300189794
74.1218307726085 2.07446816929221 0.332180758076181
74.1420543882996 2.65957457601566 0.376120643554402
74.1622780039907 2.76595755905628 0.383569300189794
74.1825016196817 2.18085115233284 0.340591728578921
74.2027252353728 2.65957457601566 0.376120643554402
74.2229488510638 3.2446809827391 0.415438829407517
74.2431724667549 2.65957457601566 0.376120643554402
74.263396082446 2.28723413537347 0.348799935660385
74.283619698137 2.92553203361722 0.394478658939308
74.3038433138281 2.18085115233284 0.340591728578921
74.3240669295192 2.97872352513754 0.398048674321006
74.3442905452102 2.50000010145472 0.364662493543428
74.3645141609013 2.23404264385315 0.34472026390471
74.3847377765924 2.60638308449535 0.372340440642192
74.4049613922834 2.23404264385315 0.34472026390471
74.4251850079745 2.07446816929221 0.332180758076181
74.4454086236656 2.28723413537347 0.348799935660385
74.4656322393566 2.55319159297503 0.368521463374206
74.4858558550477 2.65957457601566 0.376120643554402
74.5060794707388 2.07446816929221 0.332180758076181
74.5263030864298 2.50000010145472 0.364662493543428
74.5465267021209 2.44680860993441 0.360762247785373
74.566750317812 2.92553203361722 0.394478658939308
74.586973933503 2.23404264385315 0.34472026390471
74.6071975491941 2.71276606753597 0.37986322969976
74.6274211648852 2.55319159297503 0.368521463374206
74.6476447805762 2.76595755905628 0.383569300189794
74.6678683962673 2.55319159297503 0.368521463374206
74.6880920119584 2.71276606753597 0.37986322969976
74.7083156276494 2.0212766777719 0.327894375166624
74.7285392433405 3.56382993186098 0.435391122555825
74.7487628590316 2.44680860993441 0.360762247785373
74.7689864747226 2.50000010145472 0.364662493543428
74.7892100904137 2.76595755905628 0.383569300189794
74.8094337061048 2.55319159297503 0.368521463374206
74.8296573217958 3.03191501665785 0.401586954343472
74.8498809374869 3.19148949121879 0.412019521636212
74.870104553178 3.29787247425942 0.418830223061378
74.890328168869 2.28723413537347 0.348799935660385
74.9105517845601 2.34042562689378 0.352832438824499
74.9307754002512 1.86170220321096 0.314685107616239
74.9509990159422 2.55319159297503 0.368521463374206
74.9712226316333 3.13829799969848 0.408571598914043
74.9914462473243 2.55319159297503 0.368521463374206
75.0116698630154 2.44680860993441 0.360762247785373
75.0318934787065 2.23404264385315 0.34472026390471
75.0521170943975 2.34042562689378 0.352832438824499
75.0723407100886 3.08510650817816 0.405094330581189
75.0925643257797 2.50000010145472 0.364662493543428
75.1127879414707 1.91489369473127 0.319148949121879
75.1330115571618 2.0212766777719 0.327894375166624
75.1532351728529 2.50000010145472 0.364662493543428
75.1734587885439 2.28723413537347 0.348799935660385
75.193682404235 2.65957457601566 0.376120643554402
75.2139060199261 2.28723413537347 0.348799935660385
75.2341296356171 1.91489369473127 0.319148949121879
75.2543532513082 2.39361711841409 0.356819372592072
75.2745768669993 2.71276606753597 0.37986322969976
75.2948004826903 2.87234054209691 0.390876038647036
75.3150240983814 2.76595755905628 0.383569300189794
75.3352477140725 2.76595755905628 0.383569300189794
75.3554713297635 2.39361711841409 0.356819372592072
75.3756949454546 2.92553203361722 0.394478658939308
75.3959185611457 2.87234054209691 0.390876038647036
75.4161421768367 2.92553203361722 0.394478658939308
75.4363657925278 2.97872352513754 0.398048674321006
75.4565894082189 2.50000010145472 0.364662493543428
75.4768130239099 2.87234054209691 0.390876038647036
75.497036639601 2.34042562689378 0.352832438824499
75.5172602552921 2.8191490505766 0.387239903442613
75.5374838709831 2.87234054209691 0.390876038647036
75.5577074866742 3.45744694882036 0.428843514653201
75.5779311023653 2.23404264385315 0.34472026390471
75.5981547180563 3.08510650817816 0.405094330581189
75.6183783337474 2.0212766777719 0.327894375166624
75.6386019494385 2.23404264385315 0.34472026390471
75.6588255651295 2.0212766777719 0.327894375166624
75.6790491808206 2.87234054209691 0.390876038647036
75.6992727965117 2.44680860993441 0.360762247785373
75.7194964122027 2.39361711841409 0.356819372592072
75.7397200278938 2.97872352513754 0.398048674321006
75.7599436435848 2.34042562689378 0.352832438824499
75.7801672592759 2.65957457601566 0.376120643554402
75.800390874967 2.44680860993441 0.360762247785373
75.820614490658 2.28723413537347 0.348799935660385
75.8408381063491 3.08510650817816 0.405094330581189
75.8610617220402 2.28723413537347 0.348799935660385
75.8812853377312 2.87234054209691 0.390876038647036
75.9015089534223 2.65957457601566 0.376120643554402
75.9217325691134 1.91489369473127 0.319148949121879
75.9419561848044 2.55319159297503 0.368521463374206
75.9621798004955 2.18085115233284 0.340591728578921
75.9824034161866 2.65957457601566 0.376120643554402
76.0026270318776 3.03191501665785 0.401586954343472
76.0228506475687 2.23404264385315 0.34472026390471
76.0430742632598 2.50000010145472 0.364662493543428
76.0632978789508 2.18085115233284 0.340591728578921
76.0835214946419 1.96808518625159 0.323551211550436
76.103745110333 2.71276606753597 0.37986322969976
76.123968726024 2.76595755905628 0.383569300189794
76.1441923417151 2.71276606753597 0.37986322969976
76.1644159574062 2.65957457601566 0.376120643554402
76.1846395730972 2.97872352513754 0.398048674321006
76.2048631887883 2.71276606753597 0.37986322969976
76.2250868044794 2.60638308449535 0.372340440642192
76.2453104201704 2.87234054209691 0.390876038647036
76.2655340358615 2.28723413537347 0.348799935660385
76.2857576515526 2.34042562689378 0.352832438824499
76.3059812672436 1.91489369473127 0.319148949121879
76.3262048829347 2.12765966081253 0.336412530691444
76.3464284986258 2.34042562689378 0.352832438824499
76.3666521143168 2.28723413537347 0.348799935660385
76.3868757300079 2.71276606753597 0.37986322969976
76.407099345699 2.18085115233284 0.340591728578921
76.42732296139 2.87234054209691 0.390876038647036
76.4475465770811 3.03191501665785 0.401586954343472
76.4677701927722 3.2446809827391 0.415438829407517
76.4879938084632 2.55319159297503 0.368521463374206
76.5082174241543 2.50000010145472 0.364662493543428
76.5284410398453 1.91489369473127 0.319148949121879
76.5486646555364 2.65957457601566 0.376120643554402
76.5688882712275 2.34042562689378 0.352832438824499
76.5891118869185 2.23404264385315 0.34472026390471
76.6093355026096 2.39361711841409 0.356819372592072
76.6295591183007 2.60638308449535 0.372340440642192
76.6497827339917 2.28723413537347 0.348799935660385
76.6700063496828 2.60638308449535 0.372340440642192
76.6902299653739 2.55319159297503 0.368521463374206
76.7104535810649 2.23404264385315 0.34472026390471
76.730677196756 2.23404264385315 0.34472026390471
76.7509008124471 2.50000010145472 0.364662493543428
76.7711244281381 2.76595755905628 0.383569300189794
76.7913480438292 2.18085115233284 0.340591728578921
76.8115716595203 2.92553203361722 0.394478658939308
76.8317952752113 2.60638308449535 0.372340440642192
76.8520188909024 2.0212766777719 0.327894375166624
76.8722425065935 2.76595755905628 0.383569300189794
76.8924661222845 2.55319159297503 0.368521463374206
76.9126897379756 3.08510650817816 0.405094330581189
76.9329133536667 2.34042562689378 0.352832438824499
76.9531369693577 2.65957457601566 0.376120643554402
76.9733605850488 1.96808518625159 0.323551211550436
76.9935842007399 2.60638308449535 0.372340440642192
77.0138078164309 2.71276606753597 0.37986322969976
77.034031432122 2.71276606753597 0.37986322969976
77.0542550478131 1.80851071169065 0.310157028270018
77.0744786635041 2.0212766777719 0.327894375166624
77.0947022791952 1.80851071169065 0.310157028270018
77.1149258948863 2.23404264385315 0.34472026390471
77.1351495105773 1.54255325408908 0.286444948174184
77.1553731262684 2.55319159297503 0.368521463374206
77.1755967419595 2.18085115233284 0.340591728578921
77.1958203576505 1.91489369473127 0.319148949121879
77.2160439733416 1.91489369473127 0.319148949121879
77.2362675890327 2.39361711841409 0.356819372592072
77.2564912047237 2.71276606753597 0.37986322969976
77.2767148204148 2.28723413537347 0.348799935660385
77.2969384361058 2.60638308449535 0.372340440642192
77.3171620517969 2.97872352513754 0.398048674321006
77.337385667488 2.12765966081253 0.336412530691444
77.357609283179 2.23404264385315 0.34472026390471
77.3778328988701 2.07446816929221 0.332180758076181
77.3980565145612 2.60638308449535 0.372340440642192
77.4182801302522 2.23404264385315 0.34472026390471
77.4385037459433 1.64893623712971 0.296157690892575
77.4587273616344 2.50000010145472 0.364662493543428
77.4789509773254 2.12765966081253 0.336412530691444
77.4991745930165 2.07446816929221 0.332180758076181
77.5193982087076 2.34042562689378 0.352832438824499
77.5396218243986 2.55319159297503 0.368521463374206
77.5598454400897 2.44680860993441 0.360762247785373
77.5800690557808 1.86170220321096 0.314685107616239
77.6002926714718 3.51063844034067 0.432129719910892
77.6205162871629 2.76595755905628 0.383569300189794
77.640739902854 1.86170220321096 0.314685107616239
77.660963518545 2.50000010145472 0.364662493543428
77.6811871342361 2.07446816929221 0.332180758076181
77.7014107499272 2.34042562689378 0.352832438824499
77.7216343656182 2.60638308449535 0.372340440642192
77.7418579813093 1.80851071169065 0.310157028270018
77.7620815970004 2.60638308449535 0.372340440642192
77.7823052126914 2.0212766777719 0.327894375166624
77.8025288283825 2.18085115233284 0.340591728578921
77.8227524440736 1.96808518625159 0.323551211550436
77.8429760597646 2.07446816929221 0.332180758076181
77.8631996754557 2.0212766777719 0.327894375166624
77.8834232911468 2.34042562689378 0.352832438824499
77.9036469068378 2.0212766777719 0.327894375166624
77.9238705225289 2.23404264385315 0.34472026390471
77.94409413822 1.80851071169065 0.310157028270018
77.964317753911 2.60638308449535 0.372340440642192
77.9845413696021 1.86170220321096 0.314685107616239
78.0047649852932 2.28723413537347 0.348799935660385
78.0249886009842 1.80851071169065 0.310157028270018
78.0452122166753 2.07446816929221 0.332180758076181
78.0654358323663 2.34042562689378 0.352832438824499
78.0856594480574 1.91489369473127 0.319148949121879
78.1058830637485 2.12765966081253 0.336412530691444
78.1261066794395 2.18085115233284 0.340591728578921
78.1463302951306 1.86170220321096 0.314685107616239
78.1665539108217 2.39361711841409 0.356819372592072
78.1867775265127 2.34042562689378 0.352832438824499
78.2070011422038 3.13829799969848 0.408571598914043
78.2272247578949 2.76595755905628 0.383569300189794
78.2474483735859 2.39361711841409 0.356819372592072
78.267671989277 2.39361711841409 0.356819372592072
78.2878956049681 2.44680860993441 0.360762247785373
78.3081192206591 2.44680860993441 0.360762247785373
78.3283428363502 2.0212766777719 0.327894375166624
78.3485664520413 1.96808518625159 0.323551211550436
78.3687900677323 2.18085115233284 0.340591728578921
78.3890136834234 2.07446816929221 0.332180758076181
78.4092372991145 2.12765966081253 0.336412530691444
78.4294609148055 2.34042562689378 0.352832438824499
78.4496845304966 2.76595755905628 0.383569300189794
78.4699081461877 2.23404264385315 0.34472026390471
78.4901317618787 1.86170220321096 0.314685107616239
78.5103553775698 2.44680860993441 0.360762247785373
78.5305789932609 2.28723413537347 0.348799935660385
78.5508026089519 1.80851071169065 0.310157028270018
78.571026224643 2.07446816929221 0.332180758076181
78.5912498403341 2.65957457601566 0.376120643554402
78.6114734560251 2.60638308449535 0.372340440642192
78.6316970717162 1.96808518625159 0.323551211550436
78.6519206874073 2.12765966081253 0.336412530691444
78.6721443030983 2.0212766777719 0.327894375166624
78.6923679187894 2.50000010145472 0.364662493543428
78.7125915344805 2.87234054209691 0.390876038647036
78.7328151501715 2.28723413537347 0.348799935660385
78.7530387658626 2.23404264385315 0.34472026390471
78.7732623815537 2.18085115233284 0.340591728578921
78.7934859972447 1.86170220321096 0.314685107616239
78.8137096129358 2.44680860993441 0.360762247785373
78.8339332286268 1.96808518625159 0.323551211550436
78.8541568443179 1.91489369473127 0.319148949121879
78.874380460009 2.18085115233284 0.340591728578921
78.8946040757 2.71276606753597 0.37986322969976
78.9148276913911 2.23404264385315 0.34472026390471
78.9350513070822 2.65957457601566 0.376120643554402
78.9552749227732 2.76595755905628 0.383569300189794
78.9754985384643 2.34042562689378 0.352832438824499
78.9957221541554 2.55319159297503 0.368521463374206
79.0159457698464 2.07446816929221 0.332180758076181
79.0361693855375 2.23404264385315 0.34472026390471
79.0563930012286 2.76595755905628 0.383569300189794
79.0766166169196 2.50000010145472 0.364662493543428
79.0968402326107 2.12765966081253 0.336412530691444
79.1170638483018 2.44680860993441 0.360762247785373
79.1372874639928 2.12765966081253 0.336412530691444
79.1575110796839 2.8191490505766 0.387239903442613
79.177734695375 2.23404264385315 0.34472026390471
79.197958311066 1.96808518625159 0.323551211550436
79.2181819267571 2.50000010145472 0.364662493543428
79.2384055424482 2.55319159297503 0.368521463374206
79.2586291581392 2.50000010145472 0.364662493543428
79.2788527738303 2.18085115233284 0.340591728578921
79.2990763895214 1.91489369473127 0.319148949121879
79.3193000052124 2.07446816929221 0.332180758076181
79.3395236209035 2.23404264385315 0.34472026390471
79.3597472365946 1.96808518625159 0.323551211550436
79.3799708522856 2.0212766777719 0.327894375166624
79.4001944679767 2.50000010145472 0.364662493543428
79.4204180836678 2.0212766777719 0.327894375166624
79.4406416993588 2.50000010145472 0.364662493543428
79.4608653150499 2.50000010145472 0.364662493543428
79.481088930741 1.75531922017033 0.305561855301235
79.501312546432 2.39361711841409 0.356819372592072
79.5215361621231 2.0212766777719 0.327894375166624
79.5417597778142 2.28723413537347 0.348799935660385
79.5619833935052 1.54255325408908 0.286444948174184
79.5822070091963 2.87234054209691 0.390876038647036
79.6024306248873 2.12765966081253 0.336412530691444
79.6226542405784 1.48936176256877 0.281462916854699
79.6428778562695 2.28723413537347 0.348799935660385
79.6631014719605 2.07446816929221 0.332180758076181
79.6833250876516 2.34042562689378 0.352832438824499
79.7035487033427 2.34042562689378 0.352832438824499
79.7237723190337 1.86170220321096 0.314685107616239
79.7439959347248 2.07446816929221 0.332180758076181
79.7642195504159 2.12765966081253 0.336412530691444
79.7844431661069 2.18085115233284 0.340591728578921
79.804666781798 2.18085115233284 0.340591728578921
79.8248903974891 2.71276606753597 0.37986322969976
79.8451140131801 1.86170220321096 0.314685107616239
79.8653376288712 1.80851071169065 0.310157028270018
79.8855612445623 2.76595755905628 0.383569300189794
79.9057848602533 1.91489369473127 0.319148949121879
79.9260084759444 2.23404264385315 0.34472026390471
79.9462320916355 1.70212772865002 0.300896514843521
79.9664557073265 2.76595755905628 0.383569300189794
79.9866793230176 2.44680860993441 0.360762247785373
80.0069029387087 2.28723413537347 0.348799935660385
80.0271265543997 2.0212766777719 0.327894375166624
80.0473501700908 2.44680860993441 0.360762247785373
80.0675737857819 2.34042562689378 0.352832438824499
80.0877974014729 2.23404264385315 0.34472026390471
80.108021017164 2.44680860993441 0.360762247785373
80.1282446328551 1.96808518625159 0.323551211550436
80.1484682485461 2.18085115233284 0.340591728578921
80.1686918642372 2.39361711841409 0.356819372592072
80.1889154799283 1.91489369473127 0.319148949121879
80.2091390956193 1.80851071169065 0.310157028270018
80.2293627113104 2.12765966081253 0.336412530691444
80.2495863270015 2.55319159297503 0.368521463374206
80.2698099426925 2.23404264385315 0.34472026390471
80.2900335583836 1.80851071169065 0.310157028270018
80.3102571740747 2.28723413537347 0.348799935660385
80.3304807897657 2.07446816929221 0.332180758076181
80.3507044054568 2.18085115233284 0.340591728578921
80.3709280211478 2.44680860993441 0.360762247785373
80.3911516368389 2.50000010145472 0.364662493543428
80.41137525253 2.18085115233284 0.340591728578921
80.431598868221 2.28723413537347 0.348799935660385
80.4518224839121 2.12765966081253 0.336412530691444
80.4720460996032 2.60638308449535 0.372340440642192
80.4922697152942 2.0212766777719 0.327894375166624
80.5124933309853 2.44680860993441 0.360762247785373
80.5327169466764 2.28723413537347 0.348799935660385
80.5529405623674 2.12765966081253 0.336412530691444
80.5731641780585 2.18085115233284 0.340591728578921
80.5933877937496 2.44680860993441 0.360762247785373
80.6136114094406 2.8191490505766 0.387239903442613
80.6338350251317 2.44680860993441 0.360762247785373
80.6540586408228 2.39361711841409 0.356819372592072
80.6742822565138 2.44680860993441 0.360762247785373
80.6945058722049 2.50000010145472 0.364662493543428
80.714729487896 2.18085115233284 0.340591728578921
80.734953103587 2.07446816929221 0.332180758076181
80.7551767192781 1.96808518625159 0.323551211550436
80.7754003349692 2.23404264385315 0.34472026390471
80.7956239506602 1.70212772865002 0.300896514843521
80.8158475663513 2.28723413537347 0.348799935660385
80.8360711820424 1.54255325408908 0.286444948174184
80.8562947977334 2.12765966081253 0.336412530691444
80.8765184134245 2.34042562689378 0.352832438824499
80.8967420291156 2.07446816929221 0.332180758076181
80.9169656448066 2.65957457601566 0.376120643554402
80.9371892604977 2.55319159297503 0.368521463374206
80.9574128761888 2.34042562689378 0.352832438824499
80.9776364918798 1.91489369473127 0.319148949121879
80.9978601075709 2.12765966081253 0.336412530691444
81.018083723262 1.96808518625159 0.323551211550436
81.038307338953 1.70212772865002 0.300896514843521
81.0585309546441 2.12765966081253 0.336412530691444
81.0787545703352 2.12765966081253 0.336412530691444
81.0989781860262 2.18085115233284 0.340591728578921
81.1192018017173 2.28723413537347 0.348799935660385
81.1394254174083 2.23404264385315 0.34472026390471
81.1596490330994 2.28723413537347 0.348799935660385
81.1798726487905 2.60638308449535 0.372340440642192
81.2000962644815 1.86170220321096 0.314685107616239
81.2203198801726 2.39361711841409 0.356819372592072
81.2405434958637 2.39361711841409 0.356819372592072
81.2607671115547 1.70212772865002 0.300896514843521
81.2809907272458 2.34042562689378 0.352832438824499
81.3012143429369 2.07446816929221 0.332180758076181
81.3214379586279 2.50000010145472 0.364662493543428
81.341661574319 2.39361711841409 0.356819372592072
81.3618851900101 1.59574474560939 0.291341797730203
81.3821088057011 1.96808518625159 0.323551211550436
81.4023324213922 1.96808518625159 0.323551211550436
81.4225560370833 1.86170220321096 0.314685107616239
81.4427796527743 2.39361711841409 0.356819372592072
81.4630032684654 2.07446816929221 0.332180758076181
81.4832268841565 1.86170220321096 0.314685107616239
81.5034504998475 1.91489369473127 0.319148949121879
81.5236741155386 1.86170220321096 0.314685107616239
81.5438977312297 1.59574474560939 0.291341797730203
81.5641213469207 2.71276606753597 0.37986322969976
81.5843449626118 1.54255325408908 0.286444948174184
81.6045685783029 1.59574474560939 0.291341797730203
81.6247921939939 1.64893623712971 0.296157690892575
81.645015809685 1.32978728800783 0.265957457601566
81.6652394253761 2.07446816929221 0.332180758076181
81.6854630410671 1.91489369473127 0.319148949121879
81.7056866567582 2.0212766777719 0.327894375166624
81.7259102724493 1.75531922017033 0.305561855301235
81.7461338881403 1.64893623712971 0.296157690892575
81.7663575038314 1.96808518625159 0.323551211550436
81.7865811195225 1.91489369473127 0.319148949121879
81.8068047352135 2.0212766777719 0.327894375166624
81.8270283509046 2.0212766777719 0.327894375166624
81.8472519665957 1.86170220321096 0.314685107616239
81.8674755822867 1.91489369473127 0.319148949121879
81.8876991979778 1.70212772865002 0.300896514843521
81.9079228136688 1.54255325408908 0.286444948174184
81.9281464293599 2.23404264385315 0.34472026390471
81.948370045051 2.23404264385315 0.34472026390471
81.968593660742 2.39361711841409 0.356819372592072
81.9888172764331 1.91489369473127 0.319148949121879
82.0090408921242 1.91489369473127 0.319148949121879
82.0292645078152 2.50000010145472 0.364662493543428
82.0494881235063 2.18085115233284 0.340591728578921
82.0697117391974 1.64893623712971 0.296157690892575
82.0899353548884 2.07446816929221 0.332180758076181
82.1101589705795 1.91489369473127 0.319148949121879
82.1303825862706 2.50000010145472 0.364662493543428
82.1506062019616 1.80851071169065 0.310157028270018
82.1708298176527 1.59574474560939 0.291341797730203
82.1910534333438 2.12765966081253 0.336412530691444
82.2112770490348 1.91489369473127 0.319148949121879
82.2315006647259 2.18085115233284 0.340591728578921
82.251724280417 2.23404264385315 0.34472026390471
82.271947896108 2.0212766777719 0.327894375166624
82.2921715117991 1.91489369473127 0.319148949121879
82.3123951274902 2.18085115233284 0.340591728578921
82.3326187431812 2.39361711841409 0.356819372592072
82.3528423588723 1.91489369473127 0.319148949121879
82.3730659745634 1.91489369473127 0.319148949121879
82.3932895902544 1.91489369473127 0.319148949121879
82.4135132059455 2.12765966081253 0.336412530691444
82.4337368216366 2.07446816929221 0.332180758076181
82.4539604373276 1.32978728800783 0.265957457601566
82.4741840530187 2.39361711841409 0.356819372592072
82.4944076687098 2.07446816929221 0.332180758076181
82.5146312844008 1.64893623712971 0.296157690892575
82.5348549000919 1.96808518625159 0.323551211550436
82.555078515783 1.75531922017033 0.305561855301235
82.575302131474 2.12765966081253 0.336412530691444
82.5955257471651 2.0212766777719 0.327894375166624
82.6157493628562 2.39361711841409 0.356819372592072
82.6359729785472 2.34042562689378 0.352832438824499
82.6561965942383 2.28723413537347 0.348799935660385
82.6764202099293 2.18085115233284 0.340591728578921
82.6966438256204 2.50000010145472 0.364662493543428
82.7168674413115 1.96808518625159 0.323551211550436
82.7370910570025 2.18085115233284 0.340591728578921
82.7573146726936 1.96808518625159 0.323551211550436
82.7775382883847 1.48936176256877 0.281462916854699
82.7977619040757 2.0212766777719 0.327894375166624
82.8179855197668 2.07446816929221 0.332180758076181
82.8382091354579 2.18085115233284 0.340591728578921
82.8584327511489 1.96808518625159 0.323551211550436
82.87865636684 2.34042562689378 0.352832438824499
82.8988799825311 2.44680860993441 0.360762247785373
82.9191035982221 2.12765966081253 0.336412530691444
82.9393272139132 1.91489369473127 0.319148949121879
82.9595508296043 1.96808518625159 0.323551211550436
82.9797744452953 1.96808518625159 0.323551211550436
82.9999980609864 1.96808518625159 0.323551211550436
83.0202216766775 1.91489369473127 0.319148949121879
83.0404452923685 1.96808518625159 0.323551211550436
83.0606689080596 1.96808518625159 0.323551211550436
83.0808925237507 1.38297877952814 0.271224453219182
83.1011161394417 1.80851071169065 0.310157028270018
83.1213397551328 1.86170220321096 0.314685107616239
83.1415633708239 1.59574474560939 0.291341797730203
83.1617869865149 1.80851071169065 0.310157028270018
83.182010602206 2.23404264385315 0.34472026390471
83.2022342178971 1.91489369473127 0.319148949121879
83.2224578335881 2.07446816929221 0.332180758076181
83.2426814492792 1.80851071169065 0.310157028270018
83.2629050649703 1.59574474560939 0.291341797730203
83.2831286806613 1.86170220321096 0.314685107616239
83.3033522963524 1.48936176256877 0.281462916854699
83.3235759120435 1.91489369473127 0.319148949121879
83.3437995277345 2.0212766777719 0.327894375166624
83.3640231434256 1.64893623712971 0.296157690892575
83.3842467591167 2.18085115233284 0.340591728578921
83.4044703748077 1.75531922017033 0.305561855301235
83.4246939904988 2.39361711841409 0.356819372592072
83.4449176061898 1.59574474560939 0.291341797730203
83.4651412218809 2.28723413537347 0.348799935660385
83.485364837572 2.65957457601566 0.376120643554402
83.505588453263 2.18085115233284 0.340591728578921
83.5258120689541 1.86170220321096 0.314685107616239
83.5460356846452 2.18085115233284 0.340591728578921
83.5662593003362 1.54255325408908 0.286444948174184
83.5864829160273 1.59574474560939 0.291341797730203
83.6067065317184 1.80851071169065 0.310157028270018
83.6269301474094 2.0212766777719 0.327894375166624
83.6471537631005 1.38297877952814 0.271224453219182
83.6673773787916 2.07446816929221 0.332180758076181
83.6876009944826 2.39361711841409 0.356819372592072
83.7078246101737 1.96808518625159 0.323551211550436
83.7280482258648 2.44680860993441 0.360762247785373
83.7482718415558 1.80851071169065 0.310157028270018
83.7684954572469 2.55319159297503 0.368521463374206
83.788719072938 1.91489369473127 0.319148949121879
83.808942688629 1.86170220321096 0.314685107616239
83.8291663043201 2.07446816929221 0.332180758076181
83.8493899200112 1.86170220321096 0.314685107616239
83.8696135357022 1.91489369473127 0.319148949121879
83.8898371513933 2.07446816929221 0.332180758076181
83.9100607670844 2.23404264385315 0.34472026390471
83.9302843827754 1.96808518625159 0.323551211550436
83.9505079984665 1.54255325408908 0.286444948174184
83.9707316141576 2.44680860993441 0.360762247785373
83.9909552298486 1.86170220321096 0.314685107616239
84.0111788455397 1.64893623712971 0.296157690892575
84.0314024612308 1.54255325408908 0.286444948174184
84.0516260769218 2.44680860993441 0.360762247785373
84.0718496926129 1.64893623712971 0.296157690892575
84.092073308304 2.18085115233284 0.340591728578921
84.112296923995 1.70212772865002 0.300896514843521
84.1325205396861 1.70212772865002 0.300896514843521
84.1527441553772 1.86170220321096 0.314685107616239
84.1729677710682 2.12765966081253 0.336412530691444
84.1931913867593 2.0212766777719 0.327894375166624
84.2134150024503 1.70212772865002 0.300896514843521
84.2336386181414 2.12765966081253 0.336412530691444
84.2538622338325 1.48936176256877 0.281462916854699
84.2740858495235 2.0212766777719 0.327894375166624
84.2943094652146 2.0212766777719 0.327894375166624
84.3145330809057 2.23404264385315 0.34472026390471
84.3347566965967 2.07446816929221 0.332180758076181
84.3549803122878 1.27659579648752 0.260584025764691
84.3752039279789 1.86170220321096 0.314685107616239
84.3954275436699 2.0212766777719 0.327894375166624
84.415651159361 1.59574474560939 0.291341797730203
84.4358747750521 1.96808518625159 0.323551211550436
84.4560983907431 1.32978728800783 0.265957457601566
84.4763220064342 1.38297877952814 0.271224453219182
84.4965456221253 1.70212772865002 0.300896514843521
84.5167692378163 2.0212766777719 0.327894375166624
84.5369928535074 2.18085115233284 0.340591728578921
84.5572164691985 1.75531922017033 0.305561855301235
84.5774400848895 1.54255325408908 0.286444948174184
84.5976637005806 2.44680860993441 0.360762247785373
84.6178873162717 1.48936176256877 0.281462916854699
84.6381109319627 2.18085115233284 0.340591728578921
84.6583345476538 2.0212766777719 0.327894375166624
84.6785581633449 1.80851071169065 0.310157028270018
84.6987817790359 2.28723413537347 0.348799935660385
84.719005394727 2.23404264385315 0.34472026390471
84.7392290104181 2.44680860993441 0.360762247785373
84.7594526261091 1.27659579648752 0.260584025764691
84.7796762418002 1.86170220321096 0.314685107616239
84.7998998574913 1.48936176256877 0.281462916854699
84.8201234731823 1.96808518625159 0.323551211550436
84.8403470888734 1.43617027104846 0.276391097530654
84.8605707045645 2.12765966081253 0.336412530691444
84.8807943202555 1.64893623712971 0.296157690892575
84.9010179359466 1.86170220321096 0.314685107616239
84.9212415516377 1.59574474560939 0.291341797730203
84.9414651673287 1.75531922017033 0.305561855301235
84.9616887830198 1.59574474560939 0.291341797730203
84.9819123987108 1.70212772865002 0.300896514843521
85.0021360144019 1.64893623712971 0.296157690892575
85.022359630093 2.07446816929221 0.332180758076181
85.042583245784 1.59574474560939 0.291341797730203
85.0628068614751 1.96808518625159 0.323551211550436
85.0830304771662 1.75531922017033 0.305561855301235
85.1032540928572 2.23404264385315 0.34472026390471
85.1234777085483 1.80851071169065 0.310157028270018
85.1437013242394 1.70212772865002 0.300896514843521
85.1639249399304 1.80851071169065 0.310157028270018
85.1841485556215 1.86170220321096 0.314685107616239
85.2043721713126 1.48936176256877 0.281462916854699
85.2245957870036 1.86170220321096 0.314685107616239
85.2448194026947 1.75531922017033 0.305561855301235
85.2650430183858 1.59574474560939 0.291341797730203
85.2852666340768 1.70212772865002 0.300896514843521
85.3054902497679 1.70212772865002 0.300896514843521
85.325713865459 2.28723413537347 0.348799935660385
85.34593748115 1.54255325408908 0.286444948174184
85.3661610968411 1.75531922017033 0.305561855301235
85.3863847125322 2.07446816929221 0.332180758076181
85.4066083282232 1.32978728800783 0.265957457601566
85.4268319439143 1.91489369473127 0.319148949121879
85.4470555596054 1.96808518625159 0.323551211550436
85.4672791752964 1.96808518625159 0.323551211550436
85.4875027909875 1.75531922017033 0.305561855301235
85.5077264066786 1.64893623712971 0.296157690892575
85.5279500223696 1.86170220321096 0.314685107616239
85.5481736380607 2.12765966081253 0.336412530691444
85.5683972537518 1.80851071169065 0.310157028270018
85.5886208694428 1.96808518625159 0.323551211550436
85.6088444851339 2.0212766777719 0.327894375166624
85.629068100825 1.86170220321096 0.314685107616239
85.649291716516 1.48936176256877 0.281462916854699
85.6695153322071 2.07446816929221 0.332180758076181
85.6897389478981 1.86170220321096 0.314685107616239
85.7099625635892 1.59574474560939 0.291341797730203
85.7301861792803 1.59574474560939 0.291341797730203
85.7504097949713 1.75531922017033 0.305561855301235
85.7706334106624 1.48936176256877 0.281462916854699
85.7908570263535 2.23404264385315 0.34472026390471
85.8110806420445 1.70212772865002 0.300896514843521
85.8313042577356 1.27659579648752 0.260584025764691
85.8515278734267 1.80851071169065 0.310157028270018
85.8717514891177 2.18085115233284 0.340591728578921
85.8919751048088 1.54255325408908 0.286444948174184
85.9121987204999 1.32978728800783 0.265957457601566
85.9324223361909 1.32978728800783 0.265957457601566
85.952645951882 1.43617027104846 0.276391097530654
85.9728695675731 1.43617027104846 0.276391097530654
85.9930931832641 1.80851071169065 0.310157028270018
86.0133167989552 1.96808518625159 0.323551211550436
86.0335404146463 1.86170220321096 0.314685107616239
86.0537640303373 1.2234043049672 0.255097431805139
86.0739876460284 1.91489369473127 0.319148949121879
86.0942112617195 1.75531922017033 0.305561855301235
86.1144348774105 2.0212766777719 0.327894375166624
86.1346584931016 1.64893623712971 0.296157690892575
86.1548821087927 1.80851071169065 0.310157028270018
86.1751057244837 2.0212766777719 0.327894375166624
86.1953293401748 1.48936176256877 0.281462916854699
86.2155529558659 1.91489369473127 0.319148949121879
86.2357765715569 1.38297877952814 0.271224453219182
86.256000187248 2.07446816929221 0.332180758076181
86.2762238029391 1.80851071169065 0.310157028270018
86.2964474186301 1.01063833888595 0.231856336193246
86.3166710343212 1.86170220321096 0.314685107616239
86.3368946500123 1.75531922017033 0.305561855301235
86.3571182657033 1.96808518625159 0.323551211550436
86.3773418813944 1.64893623712971 0.296157690892575
86.3975654970855 2.34042562689378 0.352832438824499
86.4177891127765 2.07446816929221 0.332180758076181
86.4380127284676 1.96808518625159 0.323551211550436
86.4582363441586 1.70212772865002 0.300896514843521
86.4784599598497 1.91489369473127 0.319148949121879
86.4986835755408 2.60638308449535 0.372340440642192
86.5189071912318 1.75531922017033 0.305561855301235
86.5391308069229 1.91489369473127 0.319148949121879
86.559354422614 1.70212772865002 0.300896514843521
86.579578038305 1.96808518625159 0.323551211550436
86.5998016539961 1.80851071169065 0.310157028270018
86.6200252696872 1.59574474560939 0.291341797730203
86.6402488853782 1.96808518625159 0.323551211550436
86.6604725010693 2.0212766777719 0.327894375166624
86.6806961167604 1.54255325408908 0.286444948174184
86.7009197324514 2.07446816929221 0.332180758076181
86.7211433481425 1.48936176256877 0.281462916854699
86.7413669638336 1.80851071169065 0.310157028270018
86.7615905795246 1.80851071169065 0.310157028270018
86.7818141952157 1.75531922017033 0.305561855301235
86.8020378109068 1.70212772865002 0.300896514843521
86.8222614265978 1.91489369473127 0.319148949121879
86.8424850422889 2.23404264385315 0.34472026390471
86.86270865798 1.64893623712971 0.296157690892575
86.882932273671 2.12765966081253 0.336412530691444
86.9031558893621 2.18085115233284 0.340591728578921
86.9233795050532 1.75531922017033 0.305561855301235
86.9436031207442 1.48936176256877 0.281462916854699
86.9638267364353 1.54255325408908 0.286444948174184
86.9840503521264 2.12765966081253 0.336412530691444
87.0042739678174 1.43617027104846 0.276391097530654
87.0244975835085 1.32978728800783 0.265957457601566
87.0447211991996 1.91489369473127 0.319148949121879
87.0649448148906 1.96808518625159 0.323551211550436
87.0851684305817 1.43617027104846 0.276391097530654
87.1053920462728 1.59574474560939 0.291341797730203
87.1256156619638 1.38297877952814 0.271224453219182
87.1458392776549 1.70212772865002 0.300896514843521
87.166062893346 2.0212766777719 0.327894375166624
87.186286509037 1.96808518625159 0.323551211550436
87.2065101247281 2.0212766777719 0.327894375166624
87.2267337404191 1.43617027104846 0.276391097530654
87.2469573561102 1.64893623712971 0.296157690892575
87.2671809718013 1.43617027104846 0.276391097530654
87.2874045874923 1.01063833888595 0.231856336193246
87.3076282031834 1.32978728800783 0.265957457601566
87.3278518188745 2.07446816929221 0.332180758076181
87.3480754345655 2.28723413537347 0.348799935660385
87.3682990502566 2.12765966081253 0.336412530691444
87.3885226659477 1.48936176256877 0.281462916854699
87.4087462816387 1.54255325408908 0.286444948174184
87.4289698973298 2.23404264385315 0.34472026390471
87.4491935130209 1.80851071169065 0.310157028270018
87.4694171287119 1.91489369473127 0.319148949121879
87.489640744403 1.80851071169065 0.310157028270018
87.5098643600941 1.59574474560939 0.291341797730203
87.5300879757851 1.75531922017033 0.305561855301235
87.5503115914762 1.43617027104846 0.276391097530654
87.5705352071673 1.27659579648752 0.260584025764691
87.5907588228583 1.70212772865002 0.300896514843521
87.6109824385494 1.64893623712971 0.296157690892575
87.6312060542405 1.06382983040626 0.237879581728048
87.6514296699315 1.59574474560939 0.291341797730203
87.6716532856226 1.59574474560939 0.291341797730203
87.6918769013137 1.59574474560939 0.291341797730203
87.7121005170047 1.38297877952814 0.271224453219182
87.7323241326958 1.17021281344689 0.249490210115391
87.7525477483869 1.54255325408908 0.286444948174184
87.7727713640779 1.80851071169065 0.310157028270018
87.792994979769 1.70212772865002 0.300896514843521
87.8132185954601 1.38297877952814 0.271224453219182
87.8334422111511 1.64893623712971 0.296157690892575
87.8536658268422 1.59574474560939 0.291341797730203
87.8738894425333 1.80851071169065 0.310157028270018
87.8941130582243 1.48936176256877 0.281462916854699
87.9143366739154 1.2234043049672 0.255097431805139
87.9345602896065 1.06382983040626 0.237879581728048
87.9547839052975 1.48936176256877 0.281462916854699
87.9750075209886 1.17021281344689 0.249490210115391
87.9952311366796 1.01063833888595 0.231856336193246
88.0154547523707 2.18085115233284 0.340591728578921
88.0356783680618 1.01063833888595 0.231856336193246
88.0559019837528 1.75531922017033 0.305561855301235
88.0761255994439 1.32978728800783 0.265957457601566
88.096349215135 1.91489369473127 0.319148949121879
88.116572830826 1.32978728800783 0.265957457601566
88.1367964465171 1.75531922017033 0.305561855301235
88.1570200622082 1.27659579648752 0.260584025764691
88.1772436778992 1.48936176256877 0.281462916854699
88.1974672935903 1.54255325408908 0.286444948174184
88.2176909092814 1.32978728800783 0.265957457601566
88.2379145249724 1.38297877952814 0.271224453219182
88.2581381406635 1.59574474560939 0.291341797730203
88.2783617563546 1.59574474560939 0.291341797730203
88.2985853720456 1.43617027104846 0.276391097530654
88.3188089877367 1.06382983040626 0.237879581728048
88.3390326034278 1.43617027104846 0.276391097530654
88.3592562191188 1.38297877952814 0.271224453219182
88.3794798348099 1.86170220321096 0.314685107616239
88.399703450501 1.70212772865002 0.300896514843521
88.419927066192 1.27659579648752 0.260584025764691
88.4401506818831 1.59574474560939 0.291341797730203
88.4603742975742 0.851063864325011 0.212765966081253
88.4805979132652 1.54255325408908 0.286444948174184
88.5008215289563 1.80851071169065 0.310157028270018
88.5210451446474 1.2234043049672 0.255097431805139
88.5412687603384 1.32978728800783 0.265957457601566
88.5614923760295 1.17021281344689 0.249490210115391
88.5817159917206 1.59574474560939 0.291341797730203
88.6019396074116 1.80851071169065 0.310157028270018
88.6221632231027 1.96808518625159 0.323551211550436
88.6423868387938 1.32978728800783 0.265957457601566
88.6626104544848 1.70212772865002 0.300896514843521
88.6828340701759 1.59574474560939 0.291341797730203
88.703057685867 1.64893623712971 0.296157690892575
88.723281301558 1.48936176256877 0.281462916854699
88.7435049172491 1.64893623712971 0.296157690892575
88.7637285329401 1.75531922017033 0.305561855301235
88.7839521486312 1.75531922017033 0.305561855301235
88.8041757643223 1.70212772865002 0.300896514843521
88.8243993800133 1.70212772865002 0.300896514843521
88.8446229957044 1.80851071169065 0.310157028270018
88.8648466113955 1.54255325408908 0.286444948174184
88.8850702270865 1.27659579648752 0.260584025764691
88.9052938427776 1.48936176256877 0.281462916854699
88.9255174584687 1.64893623712971 0.296157690892575
88.9457410741597 1.54255325408908 0.286444948174184
88.9659646898508 1.2234043049672 0.255097431805139
88.9861883055419 1.70212772865002 0.300896514843521
89.0064119212329 1.43617027104846 0.276391097530654
89.026635536924 1.06382983040626 0.237879581728048
89.0468591526151 1.27659579648752 0.260584025764691
89.0670827683061 0.904255355845324 0.219314137922397
89.0873063839972 1.75531922017033 0.305561855301235
89.1075299996883 1.91489369473127 0.319148949121879
89.1277536153793 1.2234043049672 0.255097431805139
89.1479772310704 1.38297877952814 0.271224453219182
89.1682008467615 1.64893623712971 0.296157690892575
89.1884244624525 1.32978728800783 0.265957457601566
89.2086480781436 1.91489369473127 0.319148949121879
89.2288716938347 1.48936176256877 0.281462916854699
89.2490953095257 1.70212772865002 0.300896514843521
89.2693189252168 1.2234043049672 0.255097431805139
89.2895425409079 0.957446847365637 0.225672386132641
89.3097661565989 1.59574474560939 0.291341797730203
89.32998977229 1.2234043049672 0.255097431805139
89.3502133879811 1.64893623712971 0.296157690892575
89.3704370036721 1.96808518625159 0.323551211550436
89.3906606193632 1.43617027104846 0.276391097530654
89.4108842350543 1.54255325408908 0.286444948174184
89.4311078507453 1.70212772865002 0.300896514843521
89.4513314664364 0.797872372804697 0.206009760818106
89.4715550821275 1.70212772865002 0.300896514843521
89.4917786978185 1.80851071169065 0.310157028270018
89.5120023135096 1.54255325408908 0.286444948174184
89.5322259292006 1.54255325408908 0.286444948174184
89.5524495448917 1.59574474560939 0.291341797730203
89.5726731605828 1.64893623712971 0.296157690892575
89.5928967762738 1.43617027104846 0.276391097530654
89.6131203919649 1.70212772865002 0.300896514843521
89.633344007656 1.01063833888595 0.231856336193246
89.653567623347 1.59574474560939 0.291341797730203
89.6737912390381 1.17021281344689 0.249490210115391
89.6940148547292 1.01063833888595 0.231856336193246
89.7142384704202 1.32978728800783 0.265957457601566
89.7344620861113 1.11702132192658 0.243754036219437
89.7546857018024 1.38297877952814 0.271224453219182
89.7749093174934 1.75531922017033 0.305561855301235
89.7951329331845 1.59574474560939 0.291341797730203
89.8153565488756 1.38297877952814 0.271224453219182
89.8355801645666 1.48936176256877 0.281462916854699
89.8558037802577 1.2234043049672 0.255097431805139
89.8760273959488 1.54255325408908 0.286444948174184
89.8962510116398 1.32978728800783 0.265957457601566
89.9164746273309 1.48936176256877 0.281462916854699
89.936698243022 1.11702132192658 0.243754036219437
89.956921858713 1.38297877952814 0.271224453219182
89.9771454744041 1.64893623712971 0.296157690892575
89.9973690900952 1.70212772865002 0.300896514843521
