# Supplementary material for: Gd3+-Doped Magnetic Nanoparticles for Biomedical Applications
Source: Hindawi journal article supplement (doi:10.1155/2018/1412563), 2018-08-02
Supplement: f1 [file 1412563.f1.zip › MNP-Gd4.3.xye]

'Id: "" Comment: "" Operator: "Lab Manager" Anode: "Cu" Scantype: "Coupled TwoTheta/Theta" TimePerStep: "18.8" 
4.99751234054565 1.43617027104846 0.276391097530654
5.01773595623672 1.48936176256877 0.281462916854699
5.03795957192779 1.64893623712971 0.296157690892575
5.05818318761885 0.957446847365637 0.225672386132641
5.07840680330992 1.38297877952814 0.271224453219182
5.09863041900098 0.904255355845324 0.219314137922397
5.11885403469205 1.27659579648752 0.260584025764691
5.13907765038311 1.38297877952814 0.271224453219182
5.15930126607418 1.06382983040626 0.237879581728048
5.17952488176525 1.48936176256877 0.281462916854699
5.19974849745631 1.17021281344689 0.249490210115391
5.21997211314738 1.32978728800783 0.265957457601566
5.24019572883844 1.17021281344689 0.249490210115391
5.26041934452951 1.06382983040626 0.237879581728048
5.28064296022058 1.80851071169065 0.310157028270018
5.30086657591164 1.80851071169065 0.310157028270018
5.32109019160271 1.06382983040626 0.237879581728048
5.34131380729377 1.48936176256877 0.281462916854699
5.36153742298484 1.43617027104846 0.276391097530654
5.3817610386759 1.2234043049672 0.255097431805139
5.40198465436697 1.2234043049672 0.255097431805139
5.42220827005804 1.54255325408908 0.286444948174184
5.4424318857491 1.27659579648752 0.260584025764691
5.46265550144017 1.32978728800783 0.265957457601566
5.48287911713123 1.2234043049672 0.255097431805139
5.5031027328223 1.32978728800783 0.265957457601566
5.52332634851336 1.17021281344689 0.249490210115391
5.54354996420443 1.43617027104846 0.276391097530654
5.5637735798955 0.531914915203132 0.168206265345722
5.58399719558656 1.54255325408908 0.286444948174184
5.60422081127763 1.91489369473127 0.319148949121879
5.62444442696869 1.86170220321096 0.314685107616239
5.64466804265976 1.43617027104846 0.276391097530654
5.66489165835083 1.17021281344689 0.249490210115391
5.68511527404189 1.11702132192658 0.243754036219437
5.70533888973296 0.957446847365637 0.225672386132641
5.72556250542402 1.32978728800783 0.265957457601566
5.74578612111509 1.64893623712971 0.296157690892575
5.76600973680615 2.12765966081253 0.336412530691444
5.78623335249722 1.64893623712971 0.296157690892575
5.80645696818829 0.851063864325011 0.212765966081253
5.82668058387935 1.2234043049672 0.255097431805139
5.84690419957042 1.06382983040626 0.237879581728048
5.86712781526148 1.38297877952814 0.271224453219182
5.88735143095255 1.06382983040626 0.237879581728048
5.90757504664361 1.48936176256877 0.281462916854699
5.92779866233468 1.32978728800783 0.265957457601566
5.94802227802575 1.32978728800783 0.265957457601566
5.96824589371681 1.64893623712971 0.296157690892575
5.98846950940788 1.2234043049672 0.255097431805139
6.00869312509894 1.38297877952814 0.271224453219182
6.02891674079001 1.27659579648752 0.260584025764691
6.04914035648108 1.2234043049672 0.255097431805139
6.06936397217214 1.91489369473127 0.319148949121879
6.08958758786321 1.54255325408908 0.286444948174184
6.10981120355427 1.2234043049672 0.255097431805139
6.13003481924534 1.59574474560939 0.291341797730203
6.1502584349364 1.70212772865002 0.300896514843521
6.17048205062747 1.43617027104846 0.276391097530654
6.19070566631854 1.06382983040626 0.237879581728048
6.2109292820096 1.64893623712971 0.296157690892575
6.23115289770067 1.2234043049672 0.255097431805139
6.25137651339173 1.17021281344689 0.249490210115391
6.2716001290828 1.59574474560939 0.291341797730203
6.29182374477386 1.59574474560939 0.291341797730203
6.31204736046493 1.48936176256877 0.281462916854699
6.332270976156 1.32978728800783 0.265957457601566
6.35249459184706 1.32978728800783 0.265957457601566
6.37271820753813 1.70212772865002 0.300896514843521
6.39294182322919 1.32978728800783 0.265957457601566
6.41316543892026 1.38297877952814 0.271224453219182
6.43338905461133 1.32978728800783 0.265957457601566
6.45361267030239 2.28723413537347 0.348799935660385
6.47383628599346 0.797872372804697 0.206009760818106
6.49405990168452 1.38297877952814 0.271224453219182
6.51428351737559 1.32978728800783 0.265957457601566
6.53450713306665 1.86170220321096 0.314685107616239
6.55473074875772 1.38297877952814 0.271224453219182
6.57495436444879 1.54255325408908 0.286444948174184
6.59517798013985 1.2234043049672 0.255097431805139
6.61540159583092 1.54255325408908 0.286444948174184
6.63562521152198 1.38297877952814 0.271224453219182
6.65584882721305 1.48936176256877 0.281462916854699
6.67607244290411 1.54255325408908 0.286444948174184
6.69629605859518 1.17021281344689 0.249490210115391
6.71651967428625 1.32978728800783 0.265957457601566
6.73674328997731 1.32978728800783 0.265957457601566
6.75696690566838 2.28723413537347 0.348799935660385
6.77719052135944 1.59574474560939 0.291341797730203
6.79741413705051 2.07446816929221 0.332180758076181
6.81763775274158 1.32978728800783 0.265957457601566
6.83786136843264 1.38297877952814 0.271224453219182
6.85808498412371 1.27659579648752 0.260584025764691
6.87830859981477 1.38297877952814 0.271224453219182
6.89853221550584 1.59574474560939 0.291341797730203
6.9187558311969 1.01063833888595 0.231856336193246
6.93897944688797 1.75531922017033 0.305561855301235
6.95920306257904 1.86170220321096 0.314685107616239
6.9794266782701 1.27659579648752 0.260584025764691
6.99965029396117 2.12765966081253 0.336412530691444
7.01987390965223 1.70212772865002 0.300896514843521
7.0400975253433 1.48936176256877 0.281462916854699
7.06032114103436 1.75531922017033 0.305561855301235
7.08054475672543 1.75531922017033 0.305561855301235
7.1007683724165 1.32978728800783 0.265957457601566
7.12099198810756 2.28723413537347 0.348799935660385
7.14121560379863 1.43617027104846 0.276391097530654
7.16143921948969 2.0212766777719 0.327894375166624
7.18166283518076 2.0212766777719 0.327894375166624
7.20188645087183 1.86170220321096 0.314685107616239
7.22211006656289 1.2234043049672 0.255097431805139
7.24233368225396 1.64893623712971 0.296157690892575
7.26255729794502 2.44680860993441 0.360762247785373
7.28278091363609 1.91489369473127 0.319148949121879
7.30300452932715 1.54255325408908 0.286444948174184
7.32322814501822 1.11702132192658 0.243754036219437
7.34345176070929 1.91489369473127 0.319148949121879
7.36367537640035 1.64893623712971 0.296157690892575
7.38389899209142 1.96808518625159 0.323551211550436
7.40412260778248 1.75531922017033 0.305561855301235
7.42434622347355 2.34042562689378 0.352832438824499
7.44456983916461 2.07446816929221 0.332180758076181
7.46479345485568 1.75531922017033 0.305561855301235
7.48501707054675 1.38297877952814 0.271224453219182
7.50524068623781 1.91489369473127 0.319148949121879
7.52546430192888 1.48936176256877 0.281462916854699
7.54568791761994 1.86170220321096 0.314685107616239
7.56591153331101 1.2234043049672 0.255097431805139
7.58613514900208 2.12765966081253 0.336412530691444
7.60635876469314 2.65957457601566 0.376120643554402
7.62658238038421 1.38297877952814 0.271224453219182
7.64680599607527 1.64893623712971 0.296157690892575
7.66702961176634 2.0212766777719 0.327894375166624
7.6872532274574 1.43617027104846 0.276391097530654
7.70747684314847 1.59574474560939 0.291341797730203
7.72770045883954 1.75531922017033 0.305561855301235
7.7479240745306 1.91489369473127 0.319148949121879
7.76814769022167 2.23404264385315 0.34472026390471
7.78837130591273 1.54255325408908 0.286444948174184
7.8085949216038 1.70212772865002 0.300896514843521
7.82881853729486 2.0212766777719 0.327894375166624
7.84904215298593 1.80851071169065 0.310157028270018
7.869265768677 1.43617027104846 0.276391097530654
7.88948938436806 2.0212766777719 0.327894375166624
7.90971300005913 2.50000010145472 0.364662493543428
7.92993661575019 1.80851071169065 0.310157028270018
7.95016023144126 1.38297877952814 0.271224453219182
7.97038384713233 1.59574474560939 0.291341797730203
7.99060746282339 1.70212772865002 0.300896514843521
8.01083107851446 1.64893623712971 0.296157690892575
8.03105469420552 1.01063833888595 0.231856336193246
8.05127830989659 1.96808518625159 0.323551211550436
8.07150192558765 2.34042562689378 0.352832438824499
8.09172554127872 2.18085115233284 0.340591728578921
8.11194915696979 1.91489369473127 0.319148949121879
8.13217277266085 1.06382983040626 0.237879581728048
8.15239638835192 1.38297877952814 0.271224453219182
8.17262000404298 1.70212772865002 0.300896514843521
8.19284361973405 2.0212766777719 0.327894375166624
8.21306723542511 1.80851071169065 0.310157028270018
8.23329085111618 1.01063833888595 0.231856336193246
8.25351446680725 1.75531922017033 0.305561855301235
8.27373808249831 1.86170220321096 0.314685107616239
8.29396169818938 1.64893623712971 0.296157690892575
8.31418531388044 1.38297877952814 0.271224453219182
8.33440892957151 1.43617027104846 0.276391097530654
8.35463254526258 1.32978728800783 0.265957457601566
8.37485616095364 1.38297877952814 0.271224453219182
8.39507977664471 1.59574474560939 0.291341797730203
8.41530339233577 2.44680860993441 0.360762247785373
8.43552700802684 2.0212766777719 0.327894375166624
8.4557506237179 1.70212772865002 0.300896514843521
8.47597423940897 1.75531922017033 0.305561855301235
8.49619785510004 1.38297877952814 0.271224453219182
8.5164214707911 2.28723413537347 0.348799935660385
8.53664508648217 1.43617027104846 0.276391097530654
8.55686870217323 1.86170220321096 0.314685107616239
8.5770923178643 1.96808518625159 0.323551211550436
8.59731593355536 1.43617027104846 0.276391097530654
8.61753954924643 1.11702132192658 0.243754036219437
8.6377631649375 2.12765966081253 0.336412530691444
8.65798678062856 1.96808518625159 0.323551211550436
8.67821039631963 1.91489369473127 0.319148949121879
8.69843401201069 1.43617027104846 0.276391097530654
8.71865762770176 1.06382983040626 0.237879581728048
8.73888124339283 1.86170220321096 0.314685107616239
8.75910485908389 1.11702132192658 0.243754036219437
8.77932847477496 1.64893623712971 0.296157690892575
8.79955209046602 2.23404264385315 0.34472026390471
8.81977570615709 2.28723413537347 0.348799935660385
8.83999932184815 2.07446816929221 0.332180758076181
8.86022293753922 1.75531922017033 0.305561855301235
8.88044655323029 1.96808518625159 0.323551211550436
8.90067016892135 1.48936176256877 0.281462916854699
8.92089378461242 1.96808518625159 0.323551211550436
8.94111740030348 1.86170220321096 0.314685107616239
8.96134101599455 1.96808518625159 0.323551211550436
8.98156463168561 2.18085115233284 0.340591728578921
9.00178824737668 1.64893623712971 0.296157690892575
9.02201186306775 1.86170220321096 0.314685107616239
9.04223547875881 1.54255325408908 0.286444948174184
9.06245909444988 1.70212772865002 0.300896514843521
9.08268271014094 1.80851071169065 0.310157028270018
9.10290632583201 2.18085115233284 0.340591728578921
9.12312994152308 1.06382983040626 0.237879581728048
9.14335355721414 1.91489369473127 0.319148949121879
9.16357717290521 2.12765966081253 0.336412530691444
9.18380078859627 1.70212772865002 0.300896514843521
9.20402440428734 2.23404264385315 0.34472026390471
9.2242480199784 2.39361711841409 0.356819372592072
9.24447163566947 2.76595755905628 0.383569300189794
9.26469525136054 1.75531922017033 0.305561855301235
9.2849188670516 2.23404264385315 0.34472026390471
9.30514248274267 1.91489369473127 0.319148949121879
9.32536609843373 2.44680860993441 0.360762247785373
9.3455897141248 1.48936176256877 0.281462916854699
9.36581332981586 1.70212772865002 0.300896514843521
9.38603694550693 1.96808518625159 0.323551211550436
9.406260561198 1.80851071169065 0.310157028270018
9.42648417688906 1.59574474560939 0.291341797730203
9.44670779258013 2.18085115233284 0.340591728578921
9.46693140827119 1.86170220321096 0.314685107616239
9.48715502396226 1.32978728800783 0.265957457601566
9.50737863965333 2.12765966081253 0.336412530691444
9.52760225534439 1.43617027104846 0.276391097530654
9.54782587103546 1.75531922017033 0.305561855301235
9.56804948672652 1.80851071169065 0.310157028270018
9.58827310241759 1.06382983040626 0.237879581728048
9.60849671810865 1.43617027104846 0.276391097530654
9.62872033379972 1.54255325408908 0.286444948174184
9.64894394949079 1.80851071169065 0.310157028270018
9.66916756518185 1.32978728800783 0.265957457601566
9.68939118087292 2.12765966081253 0.336412530691444
9.70961479656398 1.91489369473127 0.319148949121879
9.72983841225505 1.70212772865002 0.300896514843521
9.75006202794611 1.75531922017033 0.305561855301235
9.77028564363718 1.70212772865002 0.300896514843521
9.79050925932825 1.59574474560939 0.291341797730203
9.81073287501931 1.64893623712971 0.296157690892575
9.83095649071038 1.64893623712971 0.296157690892575
9.85118010640144 1.91489369473127 0.319148949121879
9.87140372209251 1.91489369473127 0.319148949121879
9.89162733778358 1.96808518625159 0.323551211550436
9.91185095347464 1.59574474560939 0.291341797730203
9.93207456916571 1.96808518625159 0.323551211550436
9.95229818485677 1.54255325408908 0.286444948174184
9.97252180054784 1.80851071169065 0.310157028270018
9.9927454162389 1.86170220321096 0.314685107616239
10.01296903193 1.64893623712971 0.296157690892575
10.033192647621 1.17021281344689 0.249490210115391
10.0534162633121 1.27659579648752 0.260584025764691
10.0736398790032 2.0212766777719 0.327894375166624
10.0938634946942 1.96808518625159 0.323551211550436
10.1140871103853 1.70212772865002 0.300896514843521
10.1343107260764 1.86170220321096 0.314685107616239
10.1545343417674 2.50000010145472 0.364662493543428
10.1747579574585 1.48936176256877 0.281462916854699
10.1949815731496 2.07446816929221 0.332180758076181
10.2152051888406 1.80851071169065 0.310157028270018
10.2354288045317 2.39361711841409 0.356819372592072
10.2556524202228 1.48936176256877 0.281462916854699
10.2758760359138 2.07446816929221 0.332180758076181
10.2960996516049 1.01063833888595 0.231856336193246
10.316323267296 1.86170220321096 0.314685107616239
10.336546882987 1.27659579648752 0.260584025764691
10.3567704986781 1.59574474560939 0.291341797730203
10.3769941143692 2.12765966081253 0.336412530691444
10.3972177300602 1.70212772865002 0.300896514843521
10.4174413457513 1.75531922017033 0.305561855301235
10.4376649614424 1.91489369473127 0.319148949121879
10.4578885771334 1.96808518625159 0.323551211550436
10.4781121928245 1.54255325408908 0.286444948174184
10.4983358085155 1.38297877952814 0.271224453219182
10.5185594242066 1.96808518625159 0.323551211550436
10.5387830398977 1.27659579648752 0.260584025764691
10.5590066555887 1.91489369473127 0.319148949121879
10.5792302712798 2.0212766777719 0.327894375166624
10.5994538869709 1.54255325408908 0.286444948174184
10.6196775026619 1.75531922017033 0.305561855301235
10.639901118353 1.80851071169065 0.310157028270018
10.6601247340441 1.70212772865002 0.300896514843521
10.6803483497351 1.54255325408908 0.286444948174184
10.7005719654262 2.18085115233284 0.340591728578921
10.7207955811173 1.54255325408908 0.286444948174184
10.7410191968083 1.59574474560939 0.291341797730203
10.7612428124994 1.48936176256877 0.281462916854699
10.7814664281905 1.01063833888595 0.231856336193246
10.8016900438815 1.75531922017033 0.305561855301235
10.8219136595726 1.59574474560939 0.291341797730203
10.8421372752637 1.91489369473127 0.319148949121879
10.8623608909547 1.48936176256877 0.281462916854699
10.8825845066458 1.96808518625159 0.323551211550436
10.9028081223369 1.75531922017033 0.305561855301235
10.9230317380279 2.23404264385315 0.34472026390471
10.943255353719 1.38297877952814 0.271224453219182
10.9634789694101 1.06382983040626 0.237879581728048
10.9837025851011 0.851063864325011 0.212765966081253
11.0039262007922 1.80851071169065 0.310157028270018
11.0241498164833 2.0212766777719 0.327894375166624
11.0443734321743 2.12765966081253 0.336412530691444
11.0645970478654 2.18085115233284 0.340591728578921
11.0848206635565 1.64893623712971 0.296157690892575
11.1050442792475 1.27659579648752 0.260584025764691
11.1252678949386 1.86170220321096 0.314685107616239
11.1454915106297 1.27659579648752 0.260584025764691
11.1657151263207 1.06382983040626 0.237879581728048
11.1859387420118 1.64893623712971 0.296157690892575
11.2061623577029 1.48936176256877 0.281462916854699
11.2263859733939 1.38297877952814 0.271224453219182
11.246609589085 1.91489369473127 0.319148949121879
11.266833204776 1.43617027104846 0.276391097530654
11.2870568204671 1.96808518625159 0.323551211550436
11.3072804361582 1.86170220321096 0.314685107616239
11.3275040518492 1.32978728800783 0.265957457601566
11.3477276675403 1.17021281344689 0.249490210115391
11.3679512832314 1.70212772865002 0.300896514843521
11.3881748989224 1.54255325408908 0.286444948174184
11.4083985146135 1.43617027104846 0.276391097530654
11.4286221303046 1.91489369473127 0.319148949121879
11.4488457459956 1.06382983040626 0.237879581728048
11.4690693616867 1.75531922017033 0.305561855301235
11.4892929773778 1.75531922017033 0.305561855301235
11.5095165930688 1.96808518625159 0.323551211550436
11.5297402087599 1.27659579648752 0.260584025764691
11.549963824451 1.2234043049672 0.255097431805139
11.570187440142 1.59574474560939 0.291341797730203
11.5904110558331 1.80851071169065 0.310157028270018
11.6106346715242 1.54255325408908 0.286444948174184
11.6308582872152 1.27659579648752 0.260584025764691
11.6510819029063 1.38297877952814 0.271224453219182
11.6713055185974 1.64893623712971 0.296157690892575
11.6915291342884 1.64893623712971 0.296157690892575
11.7117527499795 1.32978728800783 0.265957457601566
11.7319763656706 1.06382983040626 0.237879581728048
11.7521999813616 1.70212772865002 0.300896514843521
11.7724235970527 1.54255325408908 0.286444948174184
11.7926472127438 1.70212772865002 0.300896514843521
11.8128708284348 1.43617027104846 0.276391097530654
11.8330944441259 1.48936176256877 0.281462916854699
11.853318059817 1.80851071169065 0.310157028270018
11.873541675508 1.96808518625159 0.323551211550436
11.8937652911991 1.11702132192658 0.243754036219437
11.9139889068902 1.59574474560939 0.291341797730203
11.9342125225812 1.38297877952814 0.271224453219182
11.9544361382723 1.91489369473127 0.319148949121879
11.9746597539634 1.64893623712971 0.296157690892575
11.9948833696544 1.38297877952814 0.271224453219182
12.0151069853455 1.11702132192658 0.243754036219437
12.0353306010365 0.957446847365637 0.225672386132641
12.0555542167276 1.59574474560939 0.291341797730203
12.0757778324187 1.64893623712971 0.296157690892575
12.0960014481097 2.07446816929221 0.332180758076181
12.1162250638008 1.06382983040626 0.237879581728048
12.1364486794919 1.86170220321096 0.314685107616239
12.1566722951829 1.43617027104846 0.276391097530654
12.176895910874 1.70212772865002 0.300896514843521
12.1971195265651 1.38297877952814 0.271224453219182
12.2173431422561 1.32978728800783 0.265957457601566
12.2375667579472 1.17021281344689 0.249490210115391
12.2577903736383 1.96808518625159 0.323551211550436
12.2780139893293 2.07446816929221 0.332180758076181
12.2982376050204 2.12765966081253 0.336412530691444
12.3184612207115 1.54255325408908 0.286444948174184
12.3386848364025 1.48936176256877 0.281462916854699
12.3589084520936 1.75531922017033 0.305561855301235
12.3791320677847 2.18085115233284 0.340591728578921
12.3993556834757 1.38297877952814 0.271224453219182
12.4195792991668 1.48936176256877 0.281462916854699
12.4398029148579 1.64893623712971 0.296157690892575
12.4600265305489 1.59574474560939 0.291341797730203
12.48025014624 1.48936176256877 0.281462916854699
12.5004737619311 1.70212772865002 0.300896514843521
12.5206973776221 1.75531922017033 0.305561855301235
12.5409209933132 1.80851071169065 0.310157028270018
12.5611446090043 1.64893623712971 0.296157690892575
12.5813682246953 1.86170220321096 0.314685107616239
12.6015918403864 1.80851071169065 0.310157028270018
12.6218154560775 1.75531922017033 0.305561855301235
12.6420390717685 1.43617027104846 0.276391097530654
12.6622626874596 1.38297877952814 0.271224453219182
12.6824863031507 1.54255325408908 0.286444948174184
12.7027099188417 1.70212772865002 0.300896514843521
12.7229335345328 1.48936176256877 0.281462916854699
12.7431571502239 1.64893623712971 0.296157690892575
12.7633807659149 2.0212766777719 0.327894375166624
12.783604381606 1.48936176256877 0.281462916854699
12.803827997297 1.70212772865002 0.300896514843521
12.8240516129881 1.48936176256877 0.281462916854699
12.8442752286792 1.43617027104846 0.276391097530654
12.8644988443702 1.96808518625159 0.323551211550436
12.8847224600613 1.11702132192658 0.243754036219437
12.9049460757524 1.54255325408908 0.286444948174184
12.9251696914434 1.70212772865002 0.300896514843521
12.9453933071345 1.80851071169065 0.310157028270018
12.9656169228256 1.2234043049672 0.255097431805139
12.9858405385166 1.64893623712971 0.296157690892575
13.0060641542077 1.43617027104846 0.276391097530654
13.0262877698988 2.0212766777719 0.327894375166624
13.0465113855898 1.75531922017033 0.305561855301235
13.0667350012809 1.32978728800783 0.265957457601566
13.086958616972 1.06382983040626 0.237879581728048
13.107182232663 1.48936176256877 0.281462916854699
13.1274058483541 1.64893623712971 0.296157690892575
13.1476294640452 1.43617027104846 0.276391097530654
13.1678530797362 1.27659579648752 0.260584025764691
13.1880766954273 1.06382983040626 0.237879581728048
13.2083003111184 1.48936176256877 0.281462916854699
13.2285239268094 1.17021281344689 0.249490210115391
13.2487475425005 1.17021281344689 0.249490210115391
13.2689711581916 1.32978728800783 0.265957457601566
13.2891947738826 1.27659579648752 0.260584025764691
13.3094183895737 1.48936176256877 0.281462916854699
13.3296420052648 1.17021281344689 0.249490210115391
13.3498656209558 1.54255325408908 0.286444948174184
13.3700892366469 2.07446816929221 0.332180758076181
13.390312852338 1.80851071169065 0.310157028270018
13.410536468029 1.32978728800783 0.265957457601566
13.4307600837201 1.54255325408908 0.286444948174184
13.4509836994112 1.38297877952814 0.271224453219182
13.4712073151022 1.38297877952814 0.271224453219182
13.4914309307933 1.64893623712971 0.296157690892575
13.5116545464844 1.32978728800783 0.265957457601566
13.5318781621754 1.38297877952814 0.271224453219182
13.5521017778665 1.32978728800783 0.265957457601566
13.5723253935575 2.07446816929221 0.332180758076181
13.5925490092486 1.59574474560939 0.291341797730203
13.6127726249397 1.86170220321096 0.314685107616239
13.6329962406307 1.54255325408908 0.286444948174184
13.6532198563218 1.32978728800783 0.265957457601566
13.6734434720129 1.38297877952814 0.271224453219182
13.6936670877039 1.2234043049672 0.255097431805139
13.713890703395 1.2234043049672 0.255097431805139
13.7341143190861 1.38297877952814 0.271224453219182
13.7543379347771 1.54255325408908 0.286444948174184
13.7745615504682 2.12765966081253 0.336412530691444
13.7947851661593 1.48936176256877 0.281462916854699
13.8150087818503 1.91489369473127 0.319148949121879
13.8352323975414 1.27659579648752 0.260584025764691
13.8554560132325 1.11702132192658 0.243754036219437
13.8756796289235 1.96808518625159 0.323551211550436
13.8959032446146 1.17021281344689 0.249490210115391
13.9161268603057 1.48936176256877 0.281462916854699
13.9363504759967 1.48936176256877 0.281462916854699
13.9565740916878 1.2234043049672 0.255097431805139
13.9767977073789 1.64893623712971 0.296157690892575
13.9970213230699 1.32978728800783 0.265957457601566
14.017244938761 1.48936176256877 0.281462916854699
14.0374685544521 1.43617027104846 0.276391097530654
14.0576921701431 1.32978728800783 0.265957457601566
14.0779157858342 1.43617027104846 0.276391097530654
14.0981394015253 1.64893623712971 0.296157690892575
14.1183630172163 1.54255325408908 0.286444948174184
14.1385866329074 2.23404264385315 0.34472026390471
14.1588102485985 1.11702132192658 0.243754036219437
14.1790338642895 0.904255355845324 0.219314137922397
14.1992574799806 1.43617027104846 0.276391097530654
14.2194810956717 2.18085115233284 0.340591728578921
14.2397047113627 1.11702132192658 0.243754036219437
14.2599283270538 1.27659579648752 0.260584025764691
14.2801519427449 1.96808518625159 0.323551211550436
14.3003755584359 1.59574474560939 0.291341797730203
14.320599174127 1.01063833888595 0.231856336193246
14.340822789818 1.11702132192658 0.243754036219437
14.3610464055091 1.11702132192658 0.243754036219437
14.3812700212002 1.48936176256877 0.281462916854699
14.4014936368912 2.23404264385315 0.34472026390471
14.4217172525823 2.0212766777719 0.327894375166624
14.4419408682734 1.27659579648752 0.260584025764691
14.4621644839644 1.54255325408908 0.286444948174184
14.4823880996555 2.07446816929221 0.332180758076181
14.5026117153466 1.64893623712971 0.296157690892575
14.5228353310376 1.59574474560939 0.291341797730203
14.5430589467287 1.06382983040626 0.237879581728048
14.5632825624198 1.75531922017033 0.305561855301235
14.5835061781108 1.96808518625159 0.323551211550436
14.6037297938019 1.2234043049672 0.255097431805139
14.623953409493 1.32978728800783 0.265957457601566
14.644177025184 1.54255325408908 0.286444948174184
14.6644006408751 1.32978728800783 0.265957457601566
14.6846242565662 1.32978728800783 0.265957457601566
14.7048478722572 0.904255355845324 0.219314137922397
14.7250714879483 1.32978728800783 0.265957457601566
14.7452951036394 1.64893623712971 0.296157690892575
14.7655187193304 1.43617027104846 0.276391097530654
14.7857423350215 1.43617027104846 0.276391097530654
14.8059659507126 2.18085115233284 0.340591728578921
14.8261895664036 1.38297877952814 0.271224453219182
14.8464131820947 1.48936176256877 0.281462916854699
14.8666367977858 1.32978728800783 0.265957457601566
14.8868604134768 1.64893623712971 0.296157690892575
14.9070840291679 1.54255325408908 0.286444948174184
14.927307644859 2.0212766777719 0.327894375166624
14.94753126055 1.27659579648752 0.260584025764691
14.9677548762411 1.70212772865002 0.300896514843521
14.9879784919322 1.32978728800783 0.265957457601566
15.0082021076232 1.32978728800783 0.265957457601566
15.0284257233143 1.80851071169065 0.310157028270018
15.0486493390054 1.38297877952814 0.271224453219182
15.0688729546964 0.797872372804697 0.206009760818106
15.0890965703875 1.06382983040626 0.237879581728048
15.1093201860785 1.64893623712971 0.296157690892575
15.1295438017696 1.01063833888595 0.231856336193246
15.1497674174607 1.2234043049672 0.255097431805139
15.1699910331517 1.06382983040626 0.237879581728048
15.1902146488428 1.43617027104846 0.276391097530654
15.2104382645339 1.38297877952814 0.271224453219182
15.2306618802249 1.54255325408908 0.286444948174184
15.250885495916 1.48936176256877 0.281462916854699
15.2711091116071 1.54255325408908 0.286444948174184
15.2913327272981 1.27659579648752 0.260584025764691
15.3115563429892 1.2234043049672 0.255097431805139
15.3317799586803 1.32978728800783 0.265957457601566
15.3520035743713 0.904255355845324 0.219314137922397
15.3722271900624 1.27659579648752 0.260584025764691
15.3924508057535 1.2234043049672 0.255097431805139
15.4126744214445 1.96808518625159 0.323551211550436
15.4328980371356 1.38297877952814 0.271224453219182
15.4531216528267 1.2234043049672 0.255097431805139
15.4733452685177 1.43617027104846 0.276391097530654
15.4935688842088 1.2234043049672 0.255097431805139
15.5137924998999 1.70212772865002 0.300896514843521
15.5340161155909 1.2234043049672 0.255097431805139
15.554239731282 1.38297877952814 0.271224453219182
15.5744633469731 1.64893623712971 0.296157690892575
15.5946869626641 2.12765966081253 0.336412530691444
15.6149105783552 1.75531922017033 0.305561855301235
15.6351341940463 1.38297877952814 0.271224453219182
15.6553578097373 1.38297877952814 0.271224453219182
15.6755814254284 1.75531922017033 0.305561855301235
15.6958050411195 1.64893623712971 0.296157690892575
15.7160286568105 1.91489369473127 0.319148949121879
15.7362522725016 1.48936176256877 0.281462916854699
15.7564758881927 2.0212766777719 0.327894375166624
15.7766995038837 1.43617027104846 0.276391097530654
15.7969231195748 1.54255325408908 0.286444948174184
15.8171467352659 1.75531922017033 0.305561855301235
15.8373703509569 1.59574474560939 0.291341797730203
15.857593966648 0.691489389764071 0.191784650094897
15.877817582339 1.75531922017033 0.305561855301235
15.8980411980301 1.2234043049672 0.255097431805139
15.9182648137212 1.48936176256877 0.281462916854699
15.9384884294122 1.2234043049672 0.255097431805139
15.9587120451033 1.01063833888595 0.231856336193246
15.9789356607944 1.59574474560939 0.291341797730203
15.9991592764854 1.75531922017033 0.305561855301235
16.0193828921765 2.0212766777719 0.327894375166624
16.0396065078676 1.32978728800783 0.265957457601566
16.0598301235586 1.59574474560939 0.291341797730203
16.0800537392497 1.70212772865002 0.300896514843521
16.1002773549408 1.43617027104846 0.276391097530654
16.1205009706318 1.75531922017033 0.305561855301235
16.1407245863229 1.80851071169065 0.310157028270018
16.160948202014 1.54255325408908 0.286444948174184
16.181171817705 1.70212772865002 0.300896514843521
16.2013954333961 1.48936176256877 0.281462916854699
16.2216190490872 1.80851071169065 0.310157028270018
16.2418426647782 1.70212772865002 0.300896514843521
16.2620662804693 1.27659579648752 0.260584025764691
16.2822898961604 1.32978728800783 0.265957457601566
16.3025135118514 1.80851071169065 0.310157028270018
16.3227371275425 1.38297877952814 0.271224453219182
16.3429607432336 1.70212772865002 0.300896514843521
16.3631843589246 1.38297877952814 0.271224453219182
16.3834079746157 1.48936176256877 0.281462916854699
16.4036315903068 1.70212772865002 0.300896514843521
16.4238552059978 0.797872372804697 0.206009760818106
16.4440788216889 1.59574474560939 0.291341797730203
16.46430243738 1.43617027104846 0.276391097530654
16.484526053071 1.27659579648752 0.260584025764691
16.5047496687621 1.2234043049672 0.255097431805139
16.5249732844532 1.27659579648752 0.260584025764691
16.5451969001442 1.54255325408908 0.286444948174184
16.5654205158353 1.32978728800783 0.265957457601566
16.5856441315264 1.75531922017033 0.305561855301235
16.6058677472174 2.34042562689378 0.352832438824499
16.6260913629085 1.06382983040626 0.237879581728048
16.6463149785995 1.38297877952814 0.271224453219182
16.6665385942906 1.48936176256877 0.281462916854699
16.6867622099817 1.01063833888595 0.231856336193246
16.7069858256727 1.91489369473127 0.319148949121879
16.7272094413638 1.06382983040626 0.237879581728048
16.7474330570549 1.80851071169065 0.310157028270018
16.7676566727459 1.01063833888595 0.231856336193246
16.787880288437 1.38297877952814 0.271224453219182
16.8081039041281 1.91489369473127 0.319148949121879
16.8283275198191 1.54255325408908 0.286444948174184
16.8485511355102 1.11702132192658 0.243754036219437
16.8687747512013 1.43617027104846 0.276391097530654
16.8889983668923 1.80851071169065 0.310157028270018
16.9092219825834 1.01063833888595 0.231856336193246
16.9294455982745 1.27659579648752 0.260584025764691
16.9496692139655 1.43617027104846 0.276391097530654
16.9698928296566 1.91489369473127 0.319148949121879
16.9901164453477 1.2234043049672 0.255097431805139
17.0103400610387 1.27659579648752 0.260584025764691
17.0305636767298 1.91489369473127 0.319148949121879
17.0507872924209 1.86170220321096 0.314685107616239
17.0710109081119 1.48936176256877 0.281462916854699
17.091234523803 1.91489369473127 0.319148949121879
17.1114581394941 1.64893623712971 0.296157690892575
17.1316817551851 2.0212766777719 0.327894375166624
17.1519053708762 1.32978728800783 0.265957457601566
17.1721289865673 1.54255325408908 0.286444948174184
17.1923526022583 1.38297877952814 0.271224453219182
17.2125762179494 1.54255325408908 0.286444948174184
17.2327998336405 1.17021281344689 0.249490210115391
17.2530234493315 1.54255325408908 0.286444948174184
17.2732470650226 1.43617027104846 0.276391097530654
17.2934706807137 1.54255325408908 0.286444948174184
17.3136942964047 1.75531922017033 0.305561855301235
17.3339179120958 1.86170220321096 0.314685107616239
17.3541415277869 0.851063864325011 0.212765966081253
17.3743651434779 0.904255355845324 0.219314137922397
17.394588759169 1.38297877952814 0.271224453219182
17.41481237486 1.38297877952814 0.271224453219182
17.4350359905511 1.54255325408908 0.286444948174184
17.4552596062422 1.70212772865002 0.300896514843521
17.4754832219332 1.2234043049672 0.255097431805139
17.4957068376243 1.59574474560939 0.291341797730203
17.5159304533154 1.32978728800783 0.265957457601566
17.5361540690064 1.75531922017033 0.305561855301235
17.5563776846975 1.91489369473127 0.319148949121879
17.5766013003886 2.18085115233284 0.340591728578921
17.5968249160796 1.38297877952814 0.271224453219182
17.6170485317707 1.64893623712971 0.296157690892575
17.6372721474618 1.70212772865002 0.300896514843521
17.6574957631528 1.48936176256877 0.281462916854699
17.6777193788439 1.17021281344689 0.249490210115391
17.697942994535 1.75531922017033 0.305561855301235
17.718166610226 2.18085115233284 0.340591728578921
17.7383902259171 1.86170220321096 0.314685107616239
17.7586138416082 1.80851071169065 0.310157028270018
17.7788374572992 1.48936176256877 0.281462916854699
17.7990610729903 1.70212772865002 0.300896514843521
17.8192846886814 1.54255325408908 0.286444948174184
17.8395083043724 1.27659579648752 0.260584025764691
17.8597319200635 2.0212766777719 0.327894375166624
17.8799555357546 1.80851071169065 0.310157028270018
17.9001791514456 2.18085115233284 0.340591728578921
17.9204027671367 2.39361711841409 0.356819372592072
17.9406263828278 1.91489369473127 0.319148949121879
17.9608499985188 1.43617027104846 0.276391097530654
17.9810736142099 1.70212772865002 0.300896514843521
18.001297229901 1.59574474560939 0.291341797730203
18.021520845592 1.96808518625159 0.323551211550436
18.0417444612831 2.18085115233284 0.340591728578921
18.0619680769742 1.54255325408908 0.286444948174184
18.0821916926652 1.75531922017033 0.305561855301235
18.1024153083563 1.70212772865002 0.300896514843521
18.1226389240474 1.48936176256877 0.281462916854699
18.1428625397384 2.07446816929221 0.332180758076181
18.1630861554295 1.38297877952814 0.271224453219182
18.1833097711205 2.39361711841409 0.356819372592072
18.2035333868116 1.64893623712971 0.296157690892575
18.2237570025027 2.34042562689378 0.352832438824499
18.2439806181937 2.12765966081253 0.336412530691444
18.2642042338848 1.75531922017033 0.305561855301235
18.2844278495759 2.34042562689378 0.352832438824499
18.3046514652669 2.07446816929221 0.332180758076181
18.324875080958 1.70212772865002 0.300896514843521
18.3450986966491 1.27659579648752 0.260584025764691
18.3653223123401 2.18085115233284 0.340591728578921
18.3855459280312 1.80851071169065 0.310157028270018
18.4057695437223 2.12765966081253 0.336412530691444
18.4259931594133 1.17021281344689 0.249490210115391
18.4462167751044 1.48936176256877 0.281462916854699
18.4664403907955 1.86170220321096 0.314685107616239
18.4866640064865 1.80851071169065 0.310157028270018
18.5068876221776 0.904255355845324 0.219314137922397
18.5271112378687 1.80851071169065 0.310157028270018
18.5473348535597 1.64893623712971 0.296157690892575
18.5675584692508 2.18085115233284 0.340591728578921
18.5877820849419 1.38297877952814 0.271224453219182
18.6080057006329 1.91489369473127 0.319148949121879
18.628229316324 1.70212772865002 0.300896514843521
18.6484529320151 1.48936176256877 0.281462916854699
18.6686765477061 1.70212772865002 0.300896514843521
18.6889001633972 1.11702132192658 0.243754036219437
18.7091237790883 1.48936176256877 0.281462916854699
18.7293473947793 2.28723413537347 0.348799935660385
18.7495710104704 1.32978728800783 0.265957457601566
18.7697946261615 1.48936176256877 0.281462916854699
18.7900182418525 1.48936176256877 0.281462916854699
18.8102418575436 2.12765966081253 0.336412530691444
18.8304654732347 2.12765966081253 0.336412530691444
18.8506890889257 1.80851071169065 0.310157028270018
18.8709127046168 1.01063833888595 0.231856336193246
18.8911363203079 1.27659579648752 0.260584025764691
18.9113599359989 1.48936176256877 0.281462916854699
18.93158355169 1.59574474560939 0.291341797730203
18.951807167381 1.64893623712971 0.296157690892575
18.9720307830721 1.27659579648752 0.260584025764691
18.9922543987632 1.75531922017033 0.305561855301235
19.0124780144542 2.34042562689378 0.352832438824499
19.0327016301453 0.691489389764071 0.191784650094897
19.0529252458364 1.86170220321096 0.314685107616239
19.0731488615274 1.64893623712971 0.296157690892575
19.0933724772185 1.43617027104846 0.276391097530654
19.1135960929096 1.38297877952814 0.271224453219182
19.1338197086006 1.80851071169065 0.310157028270018
19.1540433242917 1.64893623712971 0.296157690892575
19.1742669399828 1.64893623712971 0.296157690892575
19.1944905556738 1.80851071169065 0.310157028270018
19.2147141713649 1.80851071169065 0.310157028270018
19.234937787056 1.32978728800783 0.265957457601566
19.255161402747 1.43617027104846 0.276391097530654
19.2753850184381 1.43617027104846 0.276391097530654
19.2956086341292 2.07446816929221 0.332180758076181
19.3158322498202 1.96808518625159 0.323551211550436
19.3360558655113 1.48936176256877 0.281462916854699
19.3562794812024 0.957446847365637 0.225672386132641
19.3765030968934 1.80851071169065 0.310157028270018
19.3967267125845 1.27659579648752 0.260584025764691
19.4169503282756 1.70212772865002 0.300896514843521
19.4371739439666 1.96808518625159 0.323551211550436
19.4573975596577 1.59574474560939 0.291341797730203
19.4776211753488 2.07446816929221 0.332180758076181
19.4978447910398 1.80851071169065 0.310157028270018
19.5180684067309 1.27659579648752 0.260584025764691
19.538292022422 1.64893623712971 0.296157690892575
19.558515638113 1.75531922017033 0.305561855301235
19.5787392538041 1.17021281344689 0.249490210115391
19.5989628694952 1.48936176256877 0.281462916854699
19.6191864851862 0.957446847365637 0.225672386132641
19.6394101008773 1.64893623712971 0.296157690892575
19.6596337165684 1.80851071169065 0.310157028270018
19.6798573322594 1.70212772865002 0.300896514843521
19.7000809479505 1.75531922017033 0.305561855301235
19.7203045636415 1.17021281344689 0.249490210115391
19.7405281793326 1.48936176256877 0.281462916854699
19.7607517950237 1.32978728800783 0.265957457601566
19.7809754107147 1.59574474560939 0.291341797730203
19.8011990264058 2.0212766777719 0.327894375166624
19.8214226420969 2.0212766777719 0.327894375166624
19.8416462577879 1.38297877952814 0.271224453219182
19.861869873479 1.54255325408908 0.286444948174184
19.8820934891701 1.64893623712971 0.296157690892575
19.9023171048611 1.91489369473127 0.319148949121879
19.9225407205522 1.2234043049672 0.255097431805139
19.9427643362433 1.64893623712971 0.296157690892575
19.9629879519343 1.75531922017033 0.305561855301235
19.9832115676254 1.2234043049672 0.255097431805139
20.0034351833165 1.43617027104846 0.276391097530654
20.0236587990075 2.0212766777719 0.327894375166624
20.0438824146986 1.38297877952814 0.271224453219182
20.0641060303897 1.11702132192658 0.243754036219437
20.0843296460807 1.64893623712971 0.296157690892575
20.1045532617718 1.38297877952814 0.271224453219182
20.1247768774629 1.38297877952814 0.271224453219182
20.1450004931539 1.32978728800783 0.265957457601566
20.165224108845 1.48936176256877 0.281462916854699
20.1854477245361 1.75531922017033 0.305561855301235
20.2056713402271 1.2234043049672 0.255097431805139
20.2258949559182 1.27659579648752 0.260584025764691
20.2461185716093 1.64893623712971 0.296157690892575
20.2663421873003 1.01063833888595 0.231856336193246
20.2865658029914 1.70212772865002 0.300896514843521
20.3067894186825 0.957446847365637 0.225672386132641
20.3270130343735 1.96808518625159 0.323551211550436
20.3472366500646 2.07446816929221 0.332180758076181
20.3674602657557 1.70212772865002 0.300896514843521
20.3876838814467 1.11702132192658 0.243754036219437
20.4079074971378 1.96808518625159 0.323551211550436
20.4281311128289 1.38297877952814 0.271224453219182
20.4483547285199 2.12765966081253 0.336412530691444
20.468578344211 1.80851071169065 0.310157028270018
20.488801959902 1.91489369473127 0.319148949121879
20.5090255755931 1.86170220321096 0.314685107616239
20.5292491912842 2.50000010145472 0.364662493543428
20.5494728069752 2.0212766777719 0.327894375166624
20.5696964226663 1.54255325408908 0.286444948174184
20.5899200383574 1.70212772865002 0.300896514843521
20.6101436540484 2.07446816929221 0.332180758076181
20.6303672697395 1.80851071169065 0.310157028270018
20.6505908854306 1.38297877952814 0.271224453219182
20.6708145011216 1.86170220321096 0.314685107616239
20.6910381168127 1.70212772865002 0.300896514843521
20.7112617325038 2.28723413537347 0.348799935660385
20.7314853481948 1.86170220321096 0.314685107616239
20.7517089638859 2.12765966081253 0.336412530691444
20.771932579577 2.44680860993441 0.360762247785373
20.792156195268 2.39361711841409 0.356819372592072
20.8123798109591 2.28723413537347 0.348799935660385
20.8326034266502 2.23404264385315 0.34472026390471
20.8528270423412 2.8191490505766 0.387239903442613
20.8730506580323 1.75531922017033 0.305561855301235
20.8932742737234 2.18085115233284 0.340591728578921
20.9134978894144 2.0212766777719 0.327894375166624
20.9337215051055 2.65957457601566 0.376120643554402
20.9539451207966 2.65957457601566 0.376120643554402
20.9741687364876 2.60638308449535 0.372340440642192
20.9943923521787 2.28723413537347 0.348799935660385
21.0146159678698 2.87234054209691 0.390876038647036
21.0348395835608 3.03191501665785 0.401586954343472
21.0550631992519 2.44680860993441 0.360762247785373
21.075286814943 2.34042562689378 0.352832438824499
21.095510430634 3.93617037250317 0.457570511496874
21.1157340463251 3.45744694882036 0.428843514653201
21.1359576620162 3.56382993186098 0.435391122555825
21.1561812777072 3.51063844034067 0.432129719910892
21.1764048933983 4.73404274530787 0.501807527388583
21.1966285090894 3.82978738946255 0.451344772265282
21.2168521247804 3.72340440642192 0.445031947067723
21.2370757404715 5.05319169442975 0.518446528742142
21.2572993561625 4.46808528770631 0.487508072438874
21.2775229718536 4.20212783010474 0.472776317979537
21.2977465875447 4.68085125378756 0.498980420230782
21.3179702032357 4.52127677922662 0.490401320821245
21.3381938189268 5.69148959267351 0.550217066626112
21.3584174346179 4.68085125378756 0.498980420230782
21.3786410503089 5.05319169442975 0.518446528742142
21.398864666 4.62765976226725 0.49613720380912
21.4190882816911 4.25531932162505 0.475759163456095
21.4393118973821 5.00000020290944 0.515710644057907
21.4595355130732 5.05319169442975 0.518446528742142
21.4797591287643 3.77659589794223 0.448199474208799
21.4999827444553 4.57446827074693 0.493277599565779
21.5202063601464 3.77659589794223 0.448199474208799
21.5404299758375 3.51063844034067 0.432129719910892
21.5606535915285 3.2446809827391 0.415438829407517
21.5808772072196 3.6170214233813 0.438628275844795
21.6011008229107 3.03191501665785 0.401586954343472
21.6213244386017 2.28723413537347 0.348799935660385
21.6415480542928 3.13829799969848 0.408571598914043
21.6617716699839 2.55319159297503 0.368521463374206
21.6819952856749 3.19148949121879 0.412019521636212
21.702218901366 2.28723413537347 0.348799935660385
21.7224425170571 2.39361711841409 0.356819372592072
21.7426661327481 3.35106396577973 0.422194375282049
21.7628897484392 1.75531922017033 0.305561855301235
21.7831133641303 2.12765966081253 0.336412530691444
21.8033369798213 2.34042562689378 0.352832438824499
21.8235605955124 1.64893623712971 0.296157690892575
21.8437842112035 1.96808518625159 0.323551211550436
21.8640078268945 2.18085115233284 0.340591728578921
21.8842314425856 2.07446816929221 0.332180758076181
21.9044550582767 1.96808518625159 0.323551211550436
21.9246786739677 1.43617027104846 0.276391097530654
21.9449022896588 2.50000010145472 0.364662493543428
21.9651259053499 2.50000010145472 0.364662493543428
21.9853495210409 2.18085115233284 0.340591728578921
22.005573136732 1.2234043049672 0.255097431805139
22.025796752423 2.28723413537347 0.348799935660385
22.0460203681141 1.96808518625159 0.323551211550436
22.0662439838052 1.59574474560939 0.291341797730203
22.0864675994962 1.75531922017033 0.305561855301235
22.1066912151873 1.32978728800783 0.265957457601566
22.1269148308784 1.70212772865002 0.300896514843521
22.1471384465694 1.48936176256877 0.281462916854699
22.1673620622605 1.86170220321096 0.314685107616239
22.1875856779516 1.32978728800783 0.265957457601566
22.2078092936426 1.54255325408908 0.286444948174184
22.2280329093337 1.43617027104846 0.276391097530654
22.2482565250248 1.2234043049672 0.255097431805139
22.2684801407158 1.86170220321096 0.314685107616239
22.2887037564069 1.11702132192658 0.243754036219437
22.308927372098 2.55319159297503 0.368521463374206
22.329150987789 1.32978728800783 0.265957457601566
22.3493746034801 2.0212766777719 0.327894375166624
22.3695982191712 1.17021281344689 0.249490210115391
22.3898218348622 1.75531922017033 0.305561855301235
22.4100454505533 1.43617027104846 0.276391097530654
22.4302690662444 1.64893623712971 0.296157690892575
22.4504926819354 1.70212772865002 0.300896514843521
22.4707162976265 2.0212766777719 0.327894375166624
22.4909399133176 1.2234043049672 0.255097431805139
22.5111635290086 1.80851071169065 0.310157028270018
22.5313871446997 1.75531922017033 0.305561855301235
22.5516107603908 2.23404264385315 0.34472026390471
22.5718343760818 1.54255325408908 0.286444948174184
22.5920579917729 1.59574474560939 0.291341797730203
22.612281607464 1.11702132192658 0.243754036219437
22.632505223155 1.59574474560939 0.291341797730203
22.6527288388461 1.2234043049672 0.255097431805139
22.6729524545372 0.904255355845324 0.219314137922397
22.6931760702282 1.38297877952814 0.271224453219182
22.7133996859193 1.54255325408908 0.286444948174184
22.7336233016104 1.96808518625159 0.323551211550436
22.7538469173014 1.01063833888595 0.231856336193246
22.7740705329925 1.01063833888595 0.231856336193246
22.7942941486835 1.32978728800783 0.265957457601566
22.8145177643746 1.54255325408908 0.286444948174184
22.8347413800657 1.86170220321096 0.314685107616239
22.8549649957567 1.96808518625159 0.323551211550436
22.8751886114478 1.75531922017033 0.305561855301235
22.8954122271389 0.957446847365637 0.225672386132641
22.9156358428299 1.38297877952814 0.271224453219182
22.935859458521 1.86170220321096 0.314685107616239
22.9560830742121 1.32978728800783 0.265957457601566
22.9763066899031 1.80851071169065 0.310157028270018
22.9965303055942 1.80851071169065 0.310157028270018
23.0167539212853 1.2234043049672 0.255097431805139
23.0369775369763 1.32978728800783 0.265957457601566
23.0572011526674 1.17021281344689 0.249490210115391
23.0774247683585 1.59574474560939 0.291341797730203
23.0976483840495 1.11702132192658 0.243754036219437
23.1178719997406 1.70212772865002 0.300896514843521
23.1380956154317 1.59574474560939 0.291341797730203
23.1583192311227 1.70212772865002 0.300896514843521
23.1785428468138 1.59574474560939 0.291341797730203
23.1987664625049 1.38297877952814 0.271224453219182
23.2189900781959 1.86170220321096 0.314685107616239
23.239213693887 1.27659579648752 0.260584025764691
23.2594373095781 1.75531922017033 0.305561855301235
23.2796609252691 1.80851071169065 0.310157028270018
23.2998845409602 1.17021281344689 0.249490210115391
23.3201081566513 0.851063864325011 0.212765966081253
23.3403317723423 1.06382983040626 0.237879581728048
23.3605553880334 1.54255325408908 0.286444948174184
23.3807790037245 1.2234043049672 0.255097431805139
23.4010026194155 1.43617027104846 0.276391097530654
23.4212262351066 0.851063864325011 0.212765966081253
23.4414498507977 1.64893623712971 0.296157690892575
23.4616734664887 0.851063864325011 0.212765966081253
23.4818970821798 1.59574474560939 0.291341797730203
23.5021206978709 2.34042562689378 0.352832438824499
23.5223443135619 1.96808518625159 0.323551211550436
23.542567929253 1.75531922017033 0.305561855301235
23.562791544944 1.43617027104846 0.276391097530654
23.5830151606351 1.17021281344689 0.249490210115391
23.6032387763262 1.27659579648752 0.260584025764691
23.6234623920172 1.43617027104846 0.276391097530654
23.6436860077083 1.27659579648752 0.260584025764691
23.6639096233994 1.96808518625159 0.323551211550436
23.6841332390904 1.43617027104846 0.276391097530654
23.7043568547815 1.48936176256877 0.281462916854699
23.7245804704726 0.957446847365637 0.225672386132641
23.7448040861636 2.28723413537347 0.348799935660385
23.7650277018547 1.48936176256877 0.281462916854699
23.7852513175458 1.38297877952814 0.271224453219182
23.8054749332368 0.904255355845324 0.219314137922397
23.8256985489279 1.17021281344689 0.249490210115391
23.845922164619 1.43617027104846 0.276391097530654
23.86614578031 1.75531922017033 0.305561855301235
23.8863693960011 1.43617027104846 0.276391097530654
23.9065930116922 1.64893623712971 0.296157690892575
23.9268166273832 1.2234043049672 0.255097431805139
23.9470402430743 1.86170220321096 0.314685107616239
23.9672638587654 0.957446847365637 0.225672386132641
23.9874874744564 1.43617027104846 0.276391097530654
24.0077110901475 0.904255355845324 0.219314137922397
24.0279347058386 1.17021281344689 0.249490210115391
24.0481583215296 1.17021281344689 0.249490210115391
24.0683819372207 1.54255325408908 0.286444948174184
24.0886055529118 1.32978728800783 0.265957457601566
24.1088291686028 1.59574474560939 0.291341797730203
24.1290527842939 1.38297877952814 0.271224453219182
24.149276399985 1.70212772865002 0.300896514843521
24.169500015676 1.11702132192658 0.243754036219437
24.1897236313671 1.38297877952814 0.271224453219182
24.2099472470582 2.07446816929221 0.332180758076181
24.2301708627492 1.54255325408908 0.286444948174184
24.2503944784403 1.27659579648752 0.260584025764691
24.2706180941314 1.59574474560939 0.291341797730203
24.2908417098224 1.64893623712971 0.296157690892575
24.3110653255135 1.64893623712971 0.296157690892575
24.3312889412045 1.06382983040626 0.237879581728048
24.3515125568956 1.48936176256877 0.281462916854699
24.3717361725867 1.17021281344689 0.249490210115391
24.3919597882777 1.38297877952814 0.271224453219182
24.4121834039688 1.38297877952814 0.271224453219182
24.4324070196599 1.70212772865002 0.300896514843521
24.4526306353509 1.2234043049672 0.255097431805139
24.472854251042 1.48936176256877 0.281462916854699
24.4930778667331 1.43617027104846 0.276391097530654
24.5133014824241 1.06382983040626 0.237879581728048
24.5335250981152 1.27659579648752 0.260584025764691
24.5537487138063 1.64893623712971 0.296157690892575
24.5739723294973 1.17021281344689 0.249490210115391
24.5941959451884 1.75531922017033 0.305561855301235
24.6144195608795 1.48936176256877 0.281462916854699
24.6346431765705 1.64893623712971 0.296157690892575
24.6548667922616 1.2234043049672 0.255097431805139
24.6750904079527 1.54255325408908 0.286444948174184
24.6953140236437 1.38297877952814 0.271224453219182
24.7155376393348 1.17021281344689 0.249490210115391
24.7357612550259 1.11702132192658 0.243754036219437
24.7559848707169 1.80851071169065 0.310157028270018
24.776208486408 1.59574474560939 0.291341797730203
24.7964321020991 1.2234043049672 0.255097431805139
24.8166557177901 1.27659579648752 0.260584025764691
24.8368793334812 1.75531922017033 0.305561855301235
24.8571029491723 1.11702132192658 0.243754036219437
24.8773265648633 1.43617027104846 0.276391097530654
24.8975501805544 1.2234043049672 0.255097431805139
24.9177737962455 1.38297877952814 0.271224453219182
24.9379974119365 1.06382983040626 0.237879581728048
24.9582210276276 0.957446847365637 0.225672386132641
24.9784446433187 1.48936176256877 0.281462916854699
24.9986682590097 0.957446847365637 0.225672386132641
25.0188918747008 1.17021281344689 0.249490210115391
25.0391154903919 1.70212772865002 0.300896514843521
25.0593391060829 1.01063833888595 0.231856336193246
25.079562721774 1.48936176256877 0.281462916854699
25.099786337465 1.48936176256877 0.281462916854699
25.1200099531561 1.32978728800783 0.265957457601566
25.1402335688472 1.27659579648752 0.260584025764691
25.1604571845382 1.2234043049672 0.255097431805139
25.1806808002293 1.32978728800783 0.265957457601566
25.2009044159204 1.64893623712971 0.296157690892575
25.2211280316114 1.48936176256877 0.281462916854699
25.2413516473025 2.18085115233284 0.340591728578921
25.2615752629936 0.691489389764071 0.191784650094897
25.2817988786846 1.38297877952814 0.271224453219182
25.3020224943757 1.11702132192658 0.243754036219437
25.3222461100668 1.2234043049672 0.255097431805139
25.3424697257578 0.957446847365637 0.225672386132641
25.3626933414489 1.32978728800783 0.265957457601566
25.38291695714 1.86170220321096 0.314685107616239
25.403140572831 1.64893623712971 0.296157690892575
25.4233641885221 1.17021281344689 0.249490210115391
25.4435878042132 1.48936176256877 0.281462916854699
25.4638114199042 1.48936176256877 0.281462916854699
25.4840350355953 1.48936176256877 0.281462916854699
25.5042586512864 1.43617027104846 0.276391097530654
25.5244822669774 2.0212766777719 0.327894375166624
25.5447058826685 1.75531922017033 0.305561855301235
25.5649294983596 1.59574474560939 0.291341797730203
25.5851531140506 1.27659579648752 0.260584025764691
25.6053767297417 0.904255355845324 0.219314137922397
25.6256003454328 1.70212772865002 0.300896514843521
25.6458239611238 1.01063833888595 0.231856336193246
25.6660475768149 1.48936176256877 0.281462916854699
25.686271192506 1.2234043049672 0.255097431805139
25.706494808197 1.75531922017033 0.305561855301235
25.7267184238881 1.32978728800783 0.265957457601566
25.7469420395792 1.64893623712971 0.296157690892575
25.7671656552702 1.38297877952814 0.271224453219182
25.7873892709613 1.17021281344689 0.249490210115391
25.8076128866524 1.48936176256877 0.281462916854699
25.8278365023434 1.86170220321096 0.314685107616239
25.8480601180345 1.2234043049672 0.255097431805139
25.8682837337255 1.54255325408908 0.286444948174184
25.8885073494166 1.64893623712971 0.296157690892575
25.9087309651077 1.32978728800783 0.265957457601566
25.9289545807987 1.32978728800783 0.265957457601566
25.9491781964898 1.54255325408908 0.286444948174184
25.9694018121809 1.2234043049672 0.255097431805139
25.9896254278719 1.86170220321096 0.314685107616239
26.009849043563 1.64893623712971 0.296157690892575
26.0300726592541 1.64893623712971 0.296157690892575
26.0502962749451 1.38297877952814 0.271224453219182
26.0705198906362 1.91489369473127 0.319148949121879
26.0907435063273 1.32978728800783 0.265957457601566
26.1109671220183 1.17021281344689 0.249490210115391
26.1311907377094 1.75531922017033 0.305561855301235
26.1514143534005 1.48936176256877 0.281462916854699
26.1716379690915 2.0212766777719 0.327894375166624
26.1918615847826 1.54255325408908 0.286444948174184
26.2120852004737 1.32978728800783 0.265957457601566
26.2323088161647 1.27659579648752 0.260584025764691
26.2525324318558 1.27659579648752 0.260584025764691
26.2727560475469 1.01063833888595 0.231856336193246
26.2929796632379 1.75531922017033 0.305561855301235
26.313203278929 1.75531922017033 0.305561855301235
26.3334268946201 1.86170220321096 0.314685107616239
26.3536505103111 1.48936176256877 0.281462916854699
26.3738741260022 1.86170220321096 0.314685107616239
26.3940977416933 1.70212772865002 0.300896514843521
26.4143213573843 1.96808518625159 0.323551211550436
26.4345449730754 1.48936176256877 0.281462916854699
26.4547685887665 1.48936176256877 0.281462916854699
26.4749922044575 1.27659579648752 0.260584025764691
26.4952158201486 1.32978728800783 0.265957457601566
26.5154394358397 2.60638308449535 0.372340440642192
26.5356630515307 2.18085115233284 0.340591728578921
26.5558866672218 1.70212772865002 0.300896514843521
26.5761102829129 1.59574474560939 0.291341797730203
26.5963338986039 1.75531922017033 0.305561855301235
26.616557514295 1.64893623712971 0.296157690892575
26.636781129986 1.2234043049672 0.255097431805139
26.6570047456771 1.59574474560939 0.291341797730203
26.6772283613682 2.0212766777719 0.327894375166624
26.6974519770592 1.80851071169065 0.310157028270018
26.7176755927503 1.59574474560939 0.291341797730203
26.7378992084414 1.54255325408908 0.286444948174184
26.7581228241324 1.64893623712971 0.296157690892575
26.7783464398235 1.43617027104846 0.276391097530654
26.7985700555146 1.70212772865002 0.300896514843521
26.8187936712056 1.38297877952814 0.271224453219182
26.8390172868967 1.27659579648752 0.260584025764691
26.8592409025878 1.86170220321096 0.314685107616239
26.8794645182788 1.32978728800783 0.265957457601566
26.8996881339699 1.64893623712971 0.296157690892575
26.919911749661 1.59574474560939 0.291341797730203
26.940135365352 1.48936176256877 0.281462916854699
26.9603589810431 1.01063833888595 0.231856336193246
26.9805825967342 1.70212772865002 0.300896514843521
27.0008062124252 1.38297877952814 0.271224453219182
27.0210298281163 1.64893623712971 0.296157690892575
27.0412534438074 1.75531922017033 0.305561855301235
27.0614770594984 1.32978728800783 0.265957457601566
27.0817006751895 1.80851071169065 0.310157028270018
27.1019242908806 1.43617027104846 0.276391097530654
27.1221479065716 0.851063864325011 0.212765966081253
27.1423715222627 1.32978728800783 0.265957457601566
27.1625951379538 1.17021281344689 0.249490210115391
27.1828187536448 1.27659579648752 0.260584025764691
27.2030423693359 1.27659579648752 0.260584025764691
27.223265985027 1.54255325408908 0.286444948174184
27.243489600718 1.32978728800783 0.265957457601566
27.2637132164091 2.0212766777719 0.327894375166624
27.2839368321002 1.59574474560939 0.291341797730203
27.3041604477912 1.70212772865002 0.300896514843521
27.3243840634823 1.11702132192658 0.243754036219437
27.3446076791734 1.96808518625159 0.323551211550436
27.3648312948644 1.11702132192658 0.243754036219437
27.3850549105555 2.0212766777719 0.327894375166624
27.4052785262465 1.38297877952814 0.271224453219182
27.4255021419376 1.2234043049672 0.255097431805139
27.4457257576287 2.18085115233284 0.340591728578921
27.4659493733197 1.75531922017033 0.305561855301235
27.4861729890108 1.70212772865002 0.300896514843521
27.5063966047019 2.18085115233284 0.340591728578921
27.5266202203929 2.34042562689378 0.352832438824499
27.546843836084 1.96808518625159 0.323551211550436
27.5670674517751 1.86170220321096 0.314685107616239
27.5872910674661 1.70212772865002 0.300896514843521
27.6075146831572 2.50000010145472 0.364662493543428
27.6277382988483 1.96808518625159 0.323551211550436
27.6479619145393 1.27659579648752 0.260584025764691
27.6681855302304 1.11702132192658 0.243754036219437
27.6884091459215 1.64893623712971 0.296157690892575
27.7086327616125 0.638297898243758 0.184260731687103
27.7288563773036 1.38297877952814 0.271224453219182
27.7490799929947 1.43617027104846 0.276391097530654
27.7693036086857 1.70212772865002 0.300896514843521
27.7895272243768 1.86170220321096 0.314685107616239
27.8097508400679 1.96808518625159 0.323551211550436
27.8299744557589 0.851063864325011 0.212765966081253
27.85019807145 1.64893623712971 0.296157690892575
27.8704216871411 1.54255325408908 0.286444948174184
27.8906453028321 1.70212772865002 0.300896514843521
27.9108689185232 1.70212772865002 0.300896514843521
27.9310925342143 1.17021281344689 0.249490210115391
27.9513161499053 1.75531922017033 0.305561855301235
27.9715397655964 1.43617027104846 0.276391097530654
27.9917633812875 1.2234043049672 0.255097431805139
28.0119869969785 1.38297877952814 0.271224453219182
28.0322106126696 1.86170220321096 0.314685107616239
28.0524342283607 1.43617027104846 0.276391097530654
28.0726578440517 1.43617027104846 0.276391097530654
28.0928814597428 1.91489369473127 0.319148949121879
28.1131050754339 1.54255325408908 0.286444948174184
28.1333286911249 1.43617027104846 0.276391097530654
28.153552306816 1.59574474560939 0.291341797730203
28.173775922507 1.2234043049672 0.255097431805139
28.1939995381981 1.06382983040626 0.237879581728048
28.2142231538892 2.07446816929221 0.332180758076181
28.2344467695802 1.70212772865002 0.300896514843521
28.2546703852713 0.851063864325011 0.212765966081253
28.2748940009624 1.27659579648752 0.260584025764691
28.2951176166534 1.64893623712971 0.296157690892575
28.3153412323445 1.54255325408908 0.286444948174184
28.3355648480356 1.75531922017033 0.305561855301235
28.3557884637266 0.904255355845324 0.219314137922397
28.3760120794177 1.48936176256877 0.281462916854699
28.3962356951088 1.48936176256877 0.281462916854699
28.4164593107998 1.27659579648752 0.260584025764691
28.4366829264909 1.59574474560939 0.291341797730203
28.456906542182 0.957446847365637 0.225672386132641
28.477130157873 1.06382983040626 0.237879581728048
28.4973537735641 1.86170220321096 0.314685107616239
28.5175773892552 1.70212772865002 0.300896514843521
28.5378010049462 1.64893623712971 0.296157690892575
28.5580246206373 1.80851071169065 0.310157028270018
28.5782482363284 1.75531922017033 0.305561855301235
28.5984718520194 0.904255355845324 0.219314137922397
28.6186954677105 1.86170220321096 0.314685107616239
28.6389190834016 1.64893623712971 0.296157690892575
28.6591426990926 1.48936176256877 0.281462916854699
28.6793663147837 1.2234043049672 0.255097431805139
28.6995899304748 1.48936176256877 0.281462916854699
28.7198135461658 1.91489369473127 0.319148949121879
28.7400371618569 1.43617027104846 0.276391097530654
28.760260777548 1.17021281344689 0.249490210115391
28.780484393239 1.11702132192658 0.243754036219437
28.8007080089301 1.38297877952814 0.271224453219182
28.8209316246212 1.32978728800783 0.265957457601566
28.8411552403122 1.27659579648752 0.260584025764691
28.8613788560033 1.32978728800783 0.265957457601566
28.8816024716944 1.38297877952814 0.271224453219182
28.9018260873854 1.59574474560939 0.291341797730203
28.9220497030765 1.06382983040626 0.237879581728048
28.9422733187675 1.2234043049672 0.255097431805139
28.9624969344586 1.38297877952814 0.271224453219182
28.9827205501497 1.27659579648752 0.260584025764691
29.0029441658407 0.957446847365637 0.225672386132641
29.0231677815318 1.59574474560939 0.291341797730203
29.0433913972229 2.18085115233284 0.340591728578921
29.0636150129139 1.80851071169065 0.310157028270018
29.083838628605 1.43617027104846 0.276391097530654
29.1040622442961 1.54255325408908 0.286444948174184
29.1242858599871 1.48936176256877 0.281462916854699
29.1445094756782 1.59574474560939 0.291341797730203
29.1647330913693 2.18085115233284 0.340591728578921
29.1849567070603 1.27659579648752 0.260584025764691
29.2051803227514 2.07446816929221 0.332180758076181
29.2254039384425 1.70212772865002 0.300896514843521
29.2456275541335 1.91489369473127 0.319148949121879
29.2658511698246 1.59574474560939 0.291341797730203
29.2860747855157 1.48936176256877 0.281462916854699
29.3062984012067 1.96808518625159 0.323551211550436
29.3265220168978 2.28723413537347 0.348799935660385
29.3467456325889 1.59574474560939 0.291341797730203
29.3669692482799 2.0212766777719 0.327894375166624
29.387192863971 2.0212766777719 0.327894375166624
29.4074164796621 1.59574474560939 0.291341797730203
29.4276400953531 1.64893623712971 0.296157690892575
29.4478637110442 1.06382983040626 0.237879581728048
29.4680873267353 1.70212772865002 0.300896514843521
29.4883109424263 1.59574474560939 0.291341797730203
29.5085345581174 1.43617027104846 0.276391097530654
29.5287581738085 1.80851071169065 0.310157028270018
29.5489817894995 1.2234043049672 0.255097431805139
29.5692054051906 1.91489369473127 0.319148949121879
29.5894290208817 1.64893623712971 0.296157690892575
29.6096526365727 1.32978728800783 0.265957457601566
29.6298762522638 1.43617027104846 0.276391097530654
29.6500998679549 1.27659579648752 0.260584025764691
29.6703234836459 1.2234043049672 0.255097431805139
29.690547099337 1.48936176256877 0.281462916854699
29.710770715028 1.38297877952814 0.271224453219182
29.7309943307191 1.17021281344689 0.249490210115391
29.7512179464102 1.64893623712971 0.296157690892575
29.7714415621012 1.91489369473127 0.319148949121879
29.7916651777923 1.48936176256877 0.281462916854699
29.8118887934834 1.27659579648752 0.260584025764691
29.8321124091744 1.54255325408908 0.286444948174184
29.8523360248655 1.27659579648752 0.260584025764691
29.8725596405566 1.17021281344689 0.249490210115391
29.8927832562476 1.54255325408908 0.286444948174184
29.9130068719387 1.38297877952814 0.271224453219182
29.9332304876298 1.11702132192658 0.243754036219437
29.9534541033208 1.11702132192658 0.243754036219437
29.9736777190119 1.43617027104846 0.276391097530654
29.993901334703 1.43617027104846 0.276391097530654
30.014124950394 1.59574474560939 0.291341797730203
30.0343485660851 1.70212772865002 0.300896514843521
30.0545721817762 1.11702132192658 0.243754036219437
30.0747957974672 1.64893623712971 0.296157690892575
30.0950194131583 1.86170220321096 0.314685107616239
30.1152430288494 1.70212772865002 0.300896514843521
30.1354666445404 1.38297877952814 0.271224453219182
30.1556902602315 1.64893623712971 0.296157690892575
30.1759138759226 1.59574474560939 0.291341797730203
30.1961374916136 1.80851071169065 0.310157028270018
30.2163611073047 1.11702132192658 0.243754036219437
30.2365847229958 1.48936176256877 0.281462916854699
30.2568083386868 1.70212772865002 0.300896514843521
30.2770319543779 1.54255325408908 0.286444948174184
30.297255570069 1.06382983040626 0.237879581728048
30.31747918576 1.75531922017033 0.305561855301235
30.3377028014511 1.27659579648752 0.260584025764691
30.3579264171422 1.54255325408908 0.286444948174184
30.3781500328332 1.43617027104846 0.276391097530654
30.3983736485243 1.80851071169065 0.310157028270018
30.4185972642154 1.17021281344689 0.249490210115391
30.4388208799064 1.86170220321096 0.314685107616239
30.4590444955975 1.48936176256877 0.281462916854699
30.4792681112885 1.80851071169065 0.310157028270018
30.4994917269796 1.11702132192658 0.243754036219437
30.5197153426707 1.64893623712971 0.296157690892575
30.5399389583617 1.86170220321096 0.314685107616239
30.5601625740528 1.2234043049672 0.255097431805139
30.5803861897439 1.64893623712971 0.296157690892575
30.6006098054349 1.54255325408908 0.286444948174184
30.620833421126 1.43617027104846 0.276391097530654
30.6410570368171 1.70212772865002 0.300896514843521
30.6612806525081 1.43617027104846 0.276391097530654
30.6815042681992 1.32978728800783 0.265957457601566
30.7017278838903 1.48936176256877 0.281462916854699
30.7219514995813 1.43617027104846 0.276391097530654
30.7421751152724 1.17021281344689 0.249490210115391
30.7623987309635 1.43617027104846 0.276391097530654
30.7826223466545 1.75531922017033 0.305561855301235
30.8028459623456 1.38297877952814 0.271224453219182
30.8230695780367 1.54255325408908 0.286444948174184
30.8432931937277 1.80851071169065 0.310157028270018
30.8635168094188 2.0212766777719 0.327894375166624
30.8837404251099 1.96808518625159 0.323551211550436
30.9039640408009 1.17021281344689 0.249490210115391
30.924187656492 1.80851071169065 0.310157028270018
30.9444112721831 1.54255325408908 0.286444948174184
30.9646348878741 1.11702132192658 0.243754036219437
30.9848585035652 1.43617027104846 0.276391097530654
31.0050821192563 1.64893623712971 0.296157690892575
31.0253057349473 2.34042562689378 0.352832438824499
31.0455293506384 1.59574474560939 0.291341797730203
31.0657529663295 1.70212772865002 0.300896514843521
31.0859765820205 2.0212766777719 0.327894375166624
31.1062001977116 1.43617027104846 0.276391097530654
31.1264238134027 1.38297877952814 0.271224453219182
31.1466474290937 1.86170220321096 0.314685107616239
31.1668710447848 1.01063833888595 0.231856336193246
31.1870946604759 1.54255325408908 0.286444948174184
31.2073182761669 1.48936176256877 0.281462916854699
31.227541891858 1.70212772865002 0.300896514843521
31.247765507549 1.64893623712971 0.296157690892575
31.2679891232401 1.27659579648752 0.260584025764691
31.2882127389312 2.07446816929221 0.332180758076181
31.3084363546222 1.43617027104846 0.276391097530654
31.3286599703133 1.32978728800783 0.265957457601566
31.3488835860044 1.64893623712971 0.296157690892575
31.3691072016954 0.957446847365637 0.225672386132641
31.3893308173865 1.59574474560939 0.291341797730203
31.4095544330776 1.96808518625159 0.323551211550436
31.4297780487686 1.59574474560939 0.291341797730203
31.4500016644597 1.96808518625159 0.323551211550436
31.4702252801508 1.11702132192658 0.243754036219437
31.4904488958418 1.70212772865002 0.300896514843521
31.5106725115329 1.48936176256877 0.281462916854699
31.530896127224 1.70212772865002 0.300896514843521
31.551119742915 1.43617027104846 0.276391097530654
31.5713433586061 2.18085115233284 0.340591728578921
31.5915669742972 1.86170220321096 0.314685107616239
31.6117905899882 1.43617027104846 0.276391097530654
31.6320142056793 1.70212772865002 0.300896514843521
31.6522378213704 1.54255325408908 0.286444948174184
31.6724614370614 1.75531922017033 0.305561855301235
31.6926850527525 2.50000010145472 0.364662493543428
31.7129086684436 1.59574474560939 0.291341797730203
31.7331322841346 2.60638308449535 0.372340440642192
31.7533558998257 2.50000010145472 0.364662493543428
31.7735795155168 3.2446809827391 0.415438829407517
31.7938031312078 3.08510650817816 0.405094330581189
31.8140267468989 3.72340440642192 0.445031947067723
31.83425036259 5.74468108419382 0.552782195061309
31.854473978281 5.85106406723445 0.55787706953872
31.8746975939721 6.27659599939695 0.5778074963847
31.8949212096632 6.38297898243758 0.582683595460406
31.9151448253542 6.70212793155946 0.59707301148151
31.9353684410453 5.37234064355163 0.534567873881054
31.9555920567364 4.8404257283485 0.507414489430638
31.9758156724274 4.25531932162505 0.475759163456095
31.9960392881185 3.40425545730004 0.425531932162505
32.0162629038095 2.87234054209691 0.390876038647036
32.0364865195006 2.60638308449535 0.372340440642192
32.0567101351917 2.8191490505766 0.387239903442613
32.0769337508827 2.07446816929221 0.332180758076181
32.0971573665738 1.96808518625159 0.323551211550436
32.1173809822649 1.80851071169065 0.310157028270018
32.1376045979559 2.07446816929221 0.332180758076181
32.157828213647 1.54255325408908 0.286444948174184
32.1780518293381 1.54255325408908 0.286444948174184
32.1982754450291 2.0212766777719 0.327894375166624
32.2184990607202 1.86170220321096 0.314685107616239
32.2387226764113 2.34042562689378 0.352832438824499
32.2589462921023 1.43617027104846 0.276391097530654
32.2791699077934 1.80851071169065 0.310157028270018
32.2993935234845 2.28723413537347 0.348799935660385
32.3196171391755 1.91489369473127 0.319148949121879
32.3398407548666 1.48936176256877 0.281462916854699
32.3600643705577 1.80851071169065 0.310157028270018
32.3802879862487 1.96808518625159 0.323551211550436
32.4005116019398 1.70212772865002 0.300896514843521
32.4207352176309 1.75531922017033 0.305561855301235
32.4409588333219 1.59574474560939 0.291341797730203
32.461182449013 1.59574474560939 0.291341797730203
32.4814060647041 1.80851071169065 0.310157028270018
32.5016296803951 1.43617027104846 0.276391097530654
32.5218532960862 1.43617027104846 0.276391097530654
32.5420769117773 2.07446816929221 0.332180758076181
32.5623005274683 1.91489369473127 0.319148949121879
32.5825241431594 2.18085115233284 0.340591728578921
32.6027477588505 1.54255325408908 0.286444948174184
32.6229713745415 1.75531922017033 0.305561855301235
32.6431949902326 1.64893623712971 0.296157690892575
32.6634186059237 2.12765966081253 0.336412530691444
32.6836422216147 2.23404264385315 0.34472026390471
32.7038658373058 2.23404264385315 0.34472026390471
32.7240894529969 1.91489369473127 0.319148949121879
32.7443130686879 1.75531922017033 0.305561855301235
32.764536684379 1.70212772865002 0.300896514843521
32.78476030007 1.80851071169065 0.310157028270018
32.8049839157611 2.23404264385315 0.34472026390471
32.8252075314522 1.64893623712971 0.296157690892575
32.8454311471432 1.91489369473127 0.319148949121879
32.8656547628343 2.12765966081253 0.336412530691444
32.8858783785254 2.44680860993441 0.360762247785373
32.9061019942164 2.23404264385315 0.34472026390471
32.9263256099075 2.0212766777719 0.327894375166624
32.9465492255986 2.18085115233284 0.340591728578921
32.9667728412896 2.23404264385315 0.34472026390471
32.9869964569807 2.12765966081253 0.336412530691444
33.0072200726718 2.28723413537347 0.348799935660385
33.0274436883628 1.96808518625159 0.323551211550436
33.0476673040539 2.55319159297503 0.368521463374206
33.067890919745 2.23404264385315 0.34472026390471
33.088114535436 2.28723413537347 0.348799935660385
33.1083381511271 2.23404264385315 0.34472026390471
33.1285617668182 2.50000010145472 0.364662493543428
33.1487853825092 2.18085115233284 0.340591728578921
33.1690089982003 2.71276606753597 0.37986322969976
33.1892326138914 2.18085115233284 0.340591728578921
33.2094562295824 2.76595755905628 0.383569300189794
33.2296798452735 2.92553203361722 0.394478658939308
33.2499034609646 2.55319159297503 0.368521463374206
33.2701270766556 2.71276606753597 0.37986322969976
33.2903506923467 2.92553203361722 0.394478658939308
33.3105743080378 2.92553203361722 0.394478658939308
33.3307979237288 2.71276606753597 0.37986322969976
33.3510215394199 2.87234054209691 0.390876038647036
33.371245155111 2.60638308449535 0.372340440642192
33.391468770802 3.03191501665785 0.401586954343472
33.4116923864931 2.60638308449535 0.372340440642192
33.4319160021842 3.13829799969848 0.408571598914043
33.4521396178752 3.35106396577973 0.422194375282049
33.4723632335663 2.65957457601566 0.376120643554402
33.4925868492574 2.71276606753597 0.37986322969976
33.5128104649484 2.60638308449535 0.372340440642192
33.5330340806395 2.76595755905628 0.383569300189794
33.5532576963305 1.75531922017033 0.305561855301235
33.5734813120216 2.76595755905628 0.383569300189794
33.5937049277127 2.60638308449535 0.372340440642192
33.6139285434037 2.92553203361722 0.394478658939308
33.6341521590948 2.12765966081253 0.336412530691444
33.6543757747859 2.39361711841409 0.356819372592072
33.6745993904769 2.71276606753597 0.37986322969976
33.694823006168 2.65957457601566 0.376120643554402
33.7150466218591 2.87234054209691 0.390876038647036
33.7352702375501 2.71276606753597 0.37986322969976
33.7554938532412 1.75531922017033 0.305561855301235
33.7757174689323 2.18085115233284 0.340591728578921
33.7959410846233 1.80851071169065 0.310157028270018
33.8161647003144 1.43617027104846 0.276391097530654
33.8363883160055 2.12765966081253 0.336412530691444
33.8566119316965 2.18085115233284 0.340591728578921
33.8768355473876 2.18085115233284 0.340591728578921
33.8970591630787 1.96808518625159 0.323551211550436
33.9172827787697 2.65957457601566 0.376120643554402
33.9375063944608 2.18085115233284 0.340591728578921
33.9577300101519 2.65957457601566 0.376120643554402
33.9779536258429 2.44680860993441 0.360762247785373
33.998177241534 2.76595755905628 0.383569300189794
34.0184008572251 2.8191490505766 0.387239903442613
34.0386244729161 2.39361711841409 0.356819372592072
34.0588480886072 2.44680860993441 0.360762247785373
34.0790717042983 2.39361711841409 0.356819372592072
34.0992953199893 2.60638308449535 0.372340440642192
34.1195189356804 1.70212772865002 0.300896514843521
34.1397425513715 2.12765966081253 0.336412530691444
34.1599661670625 1.75531922017033 0.305561855301235
34.1801897827536 2.55319159297503 0.368521463374206
34.2004133984447 1.91489369473127 0.319148949121879
34.2206370141357 1.70212772865002 0.300896514843521
34.2408606298268 2.34042562689378 0.352832438824499
34.2610842455179 2.34042562689378 0.352832438824499
34.2813078612089 2.8191490505766 0.387239903442613
34.3015314769 1.96808518625159 0.323551211550436
34.321755092591 2.12765966081253 0.336412530691444
34.3419787082821 1.64893623712971 0.296157690892575
34.3622023239732 2.44680860993441 0.360762247785373
34.3824259396642 1.80851071169065 0.310157028270018
34.4026495553553 2.0212766777719 0.327894375166624
34.4228731710464 2.39361711841409 0.356819372592072
34.4430967867374 2.18085115233284 0.340591728578921
34.4633204024285 2.44680860993441 0.360762247785373
34.4835440181196 1.96808518625159 0.323551211550436
34.5037676338106 2.0212766777719 0.327894375166624
34.5239912495017 2.12765966081253 0.336412530691444
34.5442148651928 2.50000010145472 0.364662493543428
34.5644384808838 1.64893623712971 0.296157690892575
34.5846620965749 2.23404264385315 0.34472026390471
34.604885712266 2.71276606753597 0.37986322969976
34.625109327957 2.71276606753597 0.37986322969976
34.6453329436481 2.50000010145472 0.364662493543428
34.6655565593392 1.96808518625159 0.323551211550436
34.6857801750302 2.39361711841409 0.356819372592072
34.7060037907213 2.18085115233284 0.340591728578921
34.7262274064124 2.28723413537347 0.348799935660385
34.7464510221034 2.92553203361722 0.394478658939308
34.7666746377945 2.39361711841409 0.356819372592072
34.7868982534856 2.76595755905628 0.383569300189794
34.8071218691766 2.76595755905628 0.383569300189794
34.8273454848677 2.8191490505766 0.387239903442613
34.8475691005588 2.23404264385315 0.34472026390471
34.8677927162498 2.87234054209691 0.390876038647036
34.8880163319409 2.87234054209691 0.390876038647036
34.908239947632 2.44680860993441 0.360762247785373
34.928463563323 2.39361711841409 0.356819372592072
34.9486871790141 2.39361711841409 0.356819372592072
34.9689107947052 2.39361711841409 0.356819372592072
34.9891344103962 2.12765966081253 0.336412530691444
35.0093580260873 1.59574474560939 0.291341797730203
35.0295816417784 2.34042562689378 0.352832438824499
35.0498052574694 1.91489369473127 0.319148949121879
35.0700288731605 2.12765966081253 0.336412530691444
35.0902524888515 1.80851071169065 0.310157028270018
35.1104761045426 2.23404264385315 0.34472026390471
35.1306997202337 2.55319159297503 0.368521463374206
35.1509233359247 2.39361711841409 0.356819372592072
35.1711469516158 2.07446816929221 0.332180758076181
35.1913705673069 2.39361711841409 0.356819372592072
35.2115941829979 1.80851071169065 0.310157028270018
35.231817798689 2.12765966081253 0.336412530691444
35.2520414143801 2.0212766777719 0.327894375166624
35.2722650300711 2.07446816929221 0.332180758076181
35.2924886457622 2.18085115233284 0.340591728578921
35.3127122614533 1.70212772865002 0.300896514843521
35.3329358771443 2.28723413537347 0.348799935660385
35.3531594928354 2.0212766777719 0.327894375166624
35.3733831085265 1.96808518625159 0.323551211550436
35.3936067242175 1.38297877952814 0.271224453219182
35.4138303399086 1.43617027104846 0.276391097530654
35.4340539555997 1.59574474560939 0.291341797730203
35.4542775712907 2.07446816929221 0.332180758076181
35.4745011869818 2.23404264385315 0.34472026390471
35.4947248026729 2.23404264385315 0.34472026390471
35.5149484183639 2.12765966081253 0.336412530691444
35.535172034055 2.44680860993441 0.360762247785373
35.5553956497461 1.75531922017033 0.305561855301235
35.5756192654371 1.75531922017033 0.305561855301235
35.5958428811282 2.39361711841409 0.356819372592072
35.6160664968193 2.44680860993441 0.360762247785373
35.6362901125103 2.60638308449535 0.372340440642192
35.6565137282014 1.27659579648752 0.260584025764691
35.6767373438925 2.07446816929221 0.332180758076181
35.6969609595835 2.60638308449535 0.372340440642192
35.7171845752746 1.75531922017033 0.305561855301235
35.7374081909657 2.0212766777719 0.327894375166624
35.7576318066567 3.03191501665785 0.401586954343472
35.7778554223478 1.86170220321096 0.314685107616239
35.7980790380389 1.80851071169065 0.310157028270018
35.8183026537299 2.55319159297503 0.368521463374206
35.838526269421 2.07446816929221 0.332180758076181
35.858749885112 1.86170220321096 0.314685107616239
35.8789735008031 1.70212772865002 0.300896514843521
35.8991971164942 2.44680860993441 0.360762247785373
35.9194207321852 2.0212766777719 0.327894375166624
35.9396443478763 2.55319159297503 0.368521463374206
35.9598679635674 1.91489369473127 0.319148949121879
35.9800915792584 2.34042562689378 0.352832438824499
36.0003151949495 2.39361711841409 0.356819372592072
36.0205388106406 1.86170220321096 0.314685107616239
36.0407624263316 2.18085115233284 0.340591728578921
36.0609860420227 2.50000010145472 0.364662493543428
36.0812096577138 3.08510650817816 0.405094330581189
36.1014332734048 3.2446809827391 0.415438829407517
36.1216568890959 3.2446809827391 0.415438829407517
36.141880504787 2.12765966081253 0.336412530691444
36.162104120478 2.55319159297503 0.368521463374206
36.1823277361691 3.19148949121879 0.412019521636212
36.2025513518602 2.76595755905628 0.383569300189794
36.2227749675512 2.92553203361722 0.394478658939308
36.2429985832423 2.28723413537347 0.348799935660385
36.2632221989334 2.18085115233284 0.340591728578921
36.2834458146244 2.71276606753597 0.37986322969976
36.3036694303155 2.55319159297503 0.368521463374206
36.3238930460066 2.44680860993441 0.360762247785373
36.3441166616976 2.71276606753597 0.37986322969976
36.3643402773887 2.87234054209691 0.390876038647036
36.3845638930798 2.60638308449535 0.372340440642192
36.4047875087708 3.77659589794223 0.448199474208799
36.4250111244619 2.8191490505766 0.387239903442613
36.445234740153 2.50000010145472 0.364662493543428
36.465458355844 2.97872352513754 0.398048674321006
36.4856819715351 2.8191490505766 0.387239903442613
36.5059055872262 2.97872352513754 0.398048674321006
36.5261292029172 3.88297888098286 0.454468302768581
36.5463528186083 3.13829799969848 0.408571598914043
36.5665764342994 3.29787247425942 0.418830223061378
36.5868000499904 3.93617037250317 0.457570511496874
36.6070236656815 3.08510650817816 0.405094330581189
36.6272472813725 3.88297888098286 0.454468302768581
36.6474708970636 2.92553203361722 0.394478658939308
36.6676945127547 3.6170214233813 0.438628275844795
36.6879181284457 4.30851081314537 0.478723423682818
36.7081417441368 3.88297888098286 0.454468302768581
36.7283653598279 5.21276616899069 0.526568900976162
36.7485889755189 4.0425533555438 0.463712672386492
36.76881259121 4.41489379618599 0.48459755047143
36.7890362069011 4.62765976226725 0.49613720380912
36.8092598225921 3.98936186402349 0.460651829217758
36.8294834382832 3.72340440642192 0.445031947067723
36.8497070539743 3.35106396577973 0.422194375282049
36.8699306696653 4.14893633858443 0.469774533230711
36.8901542853564 3.6170214233813 0.438628275844795
36.9103779010475 3.77659589794223 0.448199474208799
36.9306015167385 3.2446809827391 0.415438829407517
36.9508251324296 2.50000010145472 0.364662493543428
36.9710487481207 3.6170214233813 0.438628275844795
36.9912723638117 2.8191490505766 0.387239903442613
37.0114959795028 3.67021291490161 0.441841712766838
37.0317195951939 3.29787247425942 0.418830223061378
37.0519432108849 3.08510650817816 0.405094330581189
37.072166826576 2.44680860993441 0.360762247785373
37.0923904422671 1.91489369473127 0.319148949121879
37.1126140579581 2.39361711841409 0.356819372592072
37.1328376736492 2.07446816929221 0.332180758076181
37.1530612893403 2.34042562689378 0.352832438824499
37.1732849050313 1.91489369473127 0.319148949121879
37.1935085207224 2.12765966081253 0.336412530691444
37.2137321364135 2.07446816929221 0.332180758076181
37.2339557521045 2.44680860993441 0.360762247785373
37.2541793677956 2.87234054209691 0.390876038647036
37.2744029834867 1.75531922017033 0.305561855301235
37.2946265991777 1.80851071169065 0.310157028270018
37.3148502148688 1.86170220321096 0.314685107616239
37.3350738305599 1.80851071169065 0.310157028270018
37.3552974462509 2.07446816929221 0.332180758076181
37.375521061942 1.54255325408908 0.286444948174184
37.395744677633 1.91489369473127 0.319148949121879
37.4159682933241 1.38297877952814 0.271224453219182
37.4361919090152 1.96808518625159 0.323551211550436
37.4564155247062 1.91489369473127 0.319148949121879
37.4766391403973 1.80851071169065 0.310157028270018
37.4968627560884 2.18085115233284 0.340591728578921
37.5170863717794 1.2234043049672 0.255097431805139
37.5373099874705 1.64893623712971 0.296157690892575
37.5575336031616 1.70212772865002 0.300896514843521
37.5777572188526 2.34042562689378 0.352832438824499
37.5979808345437 1.96808518625159 0.323551211550436
37.6182044502348 1.86170220321096 0.314685107616239
37.6384280659258 2.07446816929221 0.332180758076181
37.6586516816169 1.43617027104846 0.276391097530654
37.678875297308 1.48936176256877 0.281462916854699
37.699098912999 1.64893623712971 0.296157690892575
37.7193225286901 1.48936176256877 0.281462916854699
37.7395461443812 1.11702132192658 0.243754036219437
37.7597697600722 1.70212772865002 0.300896514843521
37.7799933757633 1.54255325408908 0.286444948174184
37.8002169914544 1.32978728800783 0.265957457601566
37.8204406071454 1.38297877952814 0.271224453219182
37.8406642228365 1.86170220321096 0.314685107616239
37.8608878385276 1.54255325408908 0.286444948174184
37.8811114542186 1.43617027104846 0.276391097530654
37.9013350699097 1.2234043049672 0.255097431805139
37.9215586856008 1.27659579648752 0.260584025764691
37.9417823012918 1.91489369473127 0.319148949121879
37.9620059169829 1.48936176256877 0.281462916854699
37.982229532674 1.59574474560939 0.291341797730203
38.002453148365 1.32978728800783 0.265957457601566
38.0226767640561 1.64893623712971 0.296157690892575
38.0429003797472 1.2234043049672 0.255097431805139
38.0631239954382 1.48936176256877 0.281462916854699
38.0833476111293 1.54255325408908 0.286444948174184
38.1035712268204 0.904255355845324 0.219314137922397
38.1237948425114 1.70212772865002 0.300896514843521
38.1440184582025 1.38297877952814 0.271224453219182
38.1642420738935 1.80851071169065 0.310157028270018
38.1844656895846 1.43617027104846 0.276391097530654
38.2046893052757 1.80851071169065 0.310157028270018
38.2249129209667 1.06382983040626 0.237879581728048
38.2451365366578 1.32978728800783 0.265957457601566
38.2653601523489 1.59574474560939 0.291341797730203
38.2855837680399 1.2234043049672 0.255097431805139
38.305807383731 0.904255355845324 0.219314137922397
38.3260309994221 1.11702132192658 0.243754036219437
38.3462546151131 1.75531922017033 0.305561855301235
38.3664782308042 1.54255325408908 0.286444948174184
38.3867018464953 1.54255325408908 0.286444948174184
38.4069254621863 1.54255325408908 0.286444948174184
38.4271490778774 1.70212772865002 0.300896514843521
38.4473726935685 1.38297877952814 0.271224453219182
38.4675963092595 1.11702132192658 0.243754036219437
38.4878199249506 1.54255325408908 0.286444948174184
38.5080435406417 1.96808518625159 0.323551211550436
38.5282671563327 1.80851071169065 0.310157028270018
38.5484907720238 2.12765966081253 0.336412530691444
38.5687143877149 1.54255325408908 0.286444948174184
38.5889380034059 1.38297877952814 0.271224453219182
38.609161619097 1.48936176256877 0.281462916854699
38.6293852347881 1.59574474560939 0.291341797730203
38.6496088504791 1.32978728800783 0.265957457601566
38.6698324661702 1.80851071169065 0.310157028270018
38.6900560818613 1.48936176256877 0.281462916854699
38.7102796975523 1.01063833888595 0.231856336193246
38.7305033132434 1.75531922017033 0.305561855301235
38.7507269289345 1.32978728800783 0.265957457601566
38.7709505446255 1.11702132192658 0.243754036219437
38.7911741603166 1.96808518625159 0.323551211550436
38.8113977760077 1.38297877952814 0.271224453219182
38.8316213916987 1.91489369473127 0.319148949121879
38.8518450073898 1.32978728800783 0.265957457601566
38.8720686230809 1.54255325408908 0.286444948174184
38.8922922387719 1.64893623712971 0.296157690892575
38.912515854463 1.86170220321096 0.314685107616239
38.932739470154 1.59574474560939 0.291341797730203
38.9529630858451 1.48936176256877 0.281462916854699
38.9731867015362 1.06382983040626 0.237879581728048
38.9934103172272 1.27659579648752 0.260584025764691
39.0136339329183 0.585106406723445 0.17641621941225
39.0338575486094 1.27659579648752 0.260584025764691
39.0540811643004 1.54255325408908 0.286444948174184
39.0743047799915 1.70212772865002 0.300896514843521
39.0945283956826 1.54255325408908 0.286444948174184
39.1147520113736 1.59574474560939 0.291341797730203
39.1349756270647 1.38297877952814 0.271224453219182
39.1551992427558 1.27659579648752 0.260584025764691
39.1754228584468 1.64893623712971 0.296157690892575
39.1956464741379 1.48936176256877 0.281462916854699
39.215870089829 1.2234043049672 0.255097431805139
39.23609370552 1.43617027104846 0.276391097530654
39.2563173212111 1.54255325408908 0.286444948174184
39.2765409369022 1.70212772865002 0.300896514843521
39.2967645525932 1.54255325408908 0.286444948174184
39.3169881682843 1.96808518625159 0.323551211550436
39.3372117839754 1.80851071169065 0.310157028270018
39.3574353996664 1.70212772865002 0.300896514843521
39.3776590153575 1.96808518625159 0.323551211550436
39.3978826310486 1.38297877952814 0.271224453219182
39.4181062467396 1.86170220321096 0.314685107616239
39.4383298624307 1.64893623712971 0.296157690892575
39.4585534781218 2.0212766777719 0.327894375166624
39.4787770938128 1.06382983040626 0.237879581728048
39.4990007095039 1.54255325408908 0.286444948174184
39.519224325195 1.80851071169065 0.310157028270018
39.539447940886 1.64893623712971 0.296157690892575
39.5596715565771 1.54255325408908 0.286444948174184
39.5798951722682 1.48936176256877 0.281462916854699
39.6001187879592 1.2234043049672 0.255097431805139
39.6203424036503 1.48936176256877 0.281462916854699
39.6405660193414 2.0212766777719 0.327894375166624
39.6607896350324 1.32978728800783 0.265957457601566
39.6810132507235 1.86170220321096 0.314685107616239
39.7012368664145 1.01063833888595 0.231856336193246
39.7214604821056 1.27659579648752 0.260584025764691
39.7416840977967 1.59574474560939 0.291341797730203
39.7619077134877 2.07446816929221 0.332180758076181
39.7821313291788 1.59574474560939 0.291341797730203
39.8023549448699 1.86170220321096 0.314685107616239
39.8225785605609 1.38297877952814 0.271224453219182
39.842802176252 2.28723413537347 0.348799935660385
39.8630257919431 1.27659579648752 0.260584025764691
39.8832494076341 1.64893623712971 0.296157690892575
39.9034730233252 1.59574474560939 0.291341797730203
39.9236966390163 2.28723413537347 0.348799935660385
39.9439202547073 2.0212766777719 0.327894375166624
39.9641438703984 1.86170220321096 0.314685107616239
39.9843674860895 1.96808518625159 0.323551211550436
40.0045911017805 1.86170220321096 0.314685107616239
40.0248147174716 2.07446816929221 0.332180758076181
40.0450383331627 2.23404264385315 0.34472026390471
40.0652619488537 1.80851071169065 0.310157028270018
40.0854855645448 1.64893623712971 0.296157690892575
40.1057091802359 1.96808518625159 0.323551211550436
40.1259327959269 1.11702132192658 0.243754036219437
40.146156411618 2.0212766777719 0.327894375166624
40.1663800273091 1.80851071169065 0.310157028270018
40.1866036430001 1.75531922017033 0.305561855301235
40.2068272586912 2.18085115233284 0.340591728578921
40.2270508743823 2.39361711841409 0.356819372592072
40.2472744900733 1.91489369473127 0.319148949121879
40.2674981057644 2.07446816929221 0.332180758076181
40.2877217214555 2.0212766777719 0.327894375166624
40.3079453371465 2.0212766777719 0.327894375166624
40.3281689528376 1.86170220321096 0.314685107616239
40.3483925685287 1.80851071169065 0.310157028270018
40.3686161842197 1.64893623712971 0.296157690892575
40.3888397999108 1.91489369473127 0.319148949121879
40.4090634156019 1.91489369473127 0.319148949121879
40.4292870312929 2.34042562689378 0.352832438824499
40.449510646984 2.0212766777719 0.327894375166624
40.469734262675 2.07446816929221 0.332180758076181
40.4899578783661 1.86170220321096 0.314685107616239
40.5101814940572 1.43617027104846 0.276391097530654
40.5304051097482 1.38297877952814 0.271224453219182
40.5506287254393 1.32978728800783 0.265957457601566
40.5708523411304 1.59574474560939 0.291341797730203
40.5910759568214 1.43617027104846 0.276391097530654
40.6112995725125 1.54255325408908 0.286444948174184
40.6315231882036 0.851063864325011 0.212765966081253
40.6517468038946 2.07446816929221 0.332180758076181
40.6719704195857 1.75531922017033 0.305561855301235
40.6921940352768 2.07446816929221 0.332180758076181
40.7124176509678 1.38297877952814 0.271224453219182
40.7326412666589 1.75531922017033 0.305561855301235
40.75286488235 1.70212772865002 0.300896514843521
40.773088498041 1.27659579648752 0.260584025764691
40.7933121137321 1.64893623712971 0.296157690892575
40.8135357294232 2.18085115233284 0.340591728578921
40.8337593451142 2.07446816929221 0.332180758076181
40.8539829608053 1.54255325408908 0.286444948174184
40.8742065764964 1.80851071169065 0.310157028270018
40.8944301921874 1.43617027104846 0.276391097530654
40.9146538078785 1.59574474560939 0.291341797730203
40.9348774235696 1.86170220321096 0.314685107616239
40.9551010392606 2.0212766777719 0.327894375166624
40.9753246549517 1.70212772865002 0.300896514843521
40.9955482706428 1.70212772865002 0.300896514843521
41.0157718863338 1.64893623712971 0.296157690892575
41.0359955020249 1.54255325408908 0.286444948174184
41.056219117716 1.70212772865002 0.300896514843521
41.076442733407 2.12765966081253 0.336412530691444
41.0966663490981 1.64893623712971 0.296157690892575
41.1168899647892 1.86170220321096 0.314685107616239
41.1371135804802 1.2234043049672 0.255097431805139
41.1573371961713 1.86170220321096 0.314685107616239
41.1775608118624 1.96808518625159 0.323551211550436
41.1977844275534 1.54255325408908 0.286444948174184
41.2180080432445 2.12765966081253 0.336412530691444
41.2382316589355 1.64893623712971 0.296157690892575
41.2584552746266 1.59574474560939 0.291341797730203
41.2786788903177 2.34042562689378 0.352832438824499
41.2989025060087 2.18085115233284 0.340591728578921
41.3191261216998 1.43617027104846 0.276391097530654
41.3393497373909 1.48936176256877 0.281462916854699
41.3595733530819 2.55319159297503 0.368521463374206
41.379796968773 1.86170220321096 0.314685107616239
41.4000205844641 1.54255325408908 0.286444948174184
41.4202442001551 2.50000010145472 0.364662493543428
41.4404678158462 2.28723413537347 0.348799935660385
41.4606914315373 1.86170220321096 0.314685107616239
41.4809150472283 2.0212766777719 0.327894375166624
41.5011386629194 1.86170220321096 0.314685107616239
41.5213622786105 1.75531922017033 0.305561855301235
41.5415858943015 1.32978728800783 0.265957457601566
41.5618095099926 1.54255325408908 0.286444948174184
41.5820331256837 1.64893623712971 0.296157690892575
41.6022567413747 1.32978728800783 0.265957457601566
41.6224803570658 1.43617027104846 0.276391097530654
41.6427039727569 2.12765966081253 0.336412530691444
41.6629275884479 1.38297877952814 0.271224453219182
41.683151204139 1.64893623712971 0.296157690892575
41.7033748198301 1.75531922017033 0.305561855301235
41.7235984355211 1.64893623712971 0.296157690892575
41.7438220512122 1.48936176256877 0.281462916854699
41.7640456669033 1.17021281344689 0.249490210115391
41.7842692825943 1.32978728800783 0.265957457601566
41.8044928982854 1.38297877952814 0.271224453219182
41.8247165139765 1.75531922017033 0.305561855301235
41.8449401296675 1.80851071169065 0.310157028270018
41.8651637453586 1.43617027104846 0.276391097530654
41.8853873610497 1.17021281344689 0.249490210115391
41.9056109767407 1.54255325408908 0.286444948174184
41.9258345924318 1.11702132192658 0.243754036219437
41.9460582081228 1.64893623712971 0.296157690892575
41.9662818238139 1.11702132192658 0.243754036219437
41.986505439505 2.0212766777719 0.327894375166624
42.006729055196 0.957446847365637 0.225672386132641
42.0269526708871 1.43617027104846 0.276391097530654
42.0471762865782 1.27659579648752 0.260584025764691
42.0673999022692 1.38297877952814 0.271224453219182
42.0876235179603 1.2234043049672 0.255097431805139
42.1078471336514 1.70212772865002 0.300896514843521
42.1280707493424 2.0212766777719 0.327894375166624
42.1482943650335 1.38297877952814 0.271224453219182
42.1685179807246 0.851063864325011 0.212765966081253
42.1887415964156 1.59574474560939 0.291341797730203
42.2089652121067 1.11702132192658 0.243754036219437
42.2291888277978 1.91489369473127 0.319148949121879
42.2494124434888 1.96808518625159 0.323551211550436
42.2696360591799 1.54255325408908 0.286444948174184
42.289859674871 1.43617027104846 0.276391097530654
42.310083290562 1.11702132192658 0.243754036219437
42.3303069062531 1.59574474560939 0.291341797730203
42.3505305219442 1.70212772865002 0.300896514843521
42.3707541376352 1.48936176256877 0.281462916854699
42.3909777533263 1.48936176256877 0.281462916854699
42.4112013690174 1.54255325408908 0.286444948174184
42.4314249847084 1.70212772865002 0.300896514843521
42.4516486003995 1.75531922017033 0.305561855301235
42.4718722160906 1.48936176256877 0.281462916854699
42.4920958317816 1.86170220321096 0.314685107616239
42.5123194474727 1.2234043049672 0.255097431805139
42.5325430631638 1.38297877952814 0.271224453219182
42.5527666788548 2.0212766777719 0.327894375166624
42.5729902945459 1.43617027104846 0.276391097530654
42.593213910237 1.54255325408908 0.286444948174184
42.613437525928 1.75531922017033 0.305561855301235
42.6336611416191 1.54255325408908 0.286444948174184
42.6538847573102 0.957446847365637 0.225672386132641
42.6741083730012 1.38297877952814 0.271224453219182
42.6943319886923 1.64893623712971 0.296157690892575
42.7145556043833 1.48936176256877 0.281462916854699
42.7347792200744 1.54255325408908 0.286444948174184
42.7550028357655 1.17021281344689 0.249490210115391
42.7752264514565 1.27659579648752 0.260584025764691
42.7954500671476 0.957446847365637 0.225672386132641
42.8156736828387 1.11702132192658 0.243754036219437
42.8358972985297 1.11702132192658 0.243754036219437
42.8561209142208 1.75531922017033 0.305561855301235
42.8763445299119 1.32978728800783 0.265957457601566
42.8965681456029 1.32978728800783 0.265957457601566
42.916791761294 1.43617027104846 0.276391097530654
42.9370153769851 1.38297877952814 0.271224453219182
42.9572389926761 1.80851071169065 0.310157028270018
42.9774626083672 1.80851071169065 0.310157028270018
42.9976862240583 1.43617027104846 0.276391097530654
43.0179098397493 1.01063833888595 0.231856336193246
43.0381334554404 1.70212772865002 0.300896514843521
43.0583570711315 1.59574474560939 0.291341797730203
43.0785806868225 1.54255325408908 0.286444948174184
43.0988043025136 1.27659579648752 0.260584025764691
43.1190279182047 1.32978728800783 0.265957457601566
43.1392515338957 1.59574474560939 0.291341797730203
43.1594751495868 1.75531922017033 0.305561855301235
43.1796987652779 1.59574474560939 0.291341797730203
43.1999223809689 1.38297877952814 0.271224453219182
43.22014599666 1.27659579648752 0.260584025764691
43.2403696123511 1.2234043049672 0.255097431805139
43.2605932280421 1.70212772865002 0.300896514843521
43.2808168437332 1.17021281344689 0.249490210115391
43.3010404594243 1.48936176256877 0.281462916854699
43.3212640751153 1.2234043049672 0.255097431805139
43.3414876908064 1.43617027104846 0.276391097530654
43.3617113064975 1.43617027104846 0.276391097530654
43.3819349221885 1.27659579648752 0.260584025764691
43.4021585378796 1.32978728800783 0.265957457601566
43.4223821535707 1.43617027104846 0.276391097530654
43.4426057692617 1.86170220321096 0.314685107616239
43.4628293849528 1.75531922017033 0.305561855301235
43.4830530006438 1.43617027104846 0.276391097530654
43.5032766163349 1.38297877952814 0.271224453219182
43.523500232026 1.17021281344689 0.249490210115391
43.543723847717 1.38297877952814 0.271224453219182
43.5639474634081 1.17021281344689 0.249490210115391
43.5841710790992 1.11702132192658 0.243754036219437
43.6043946947902 1.59574474560939 0.291341797730203
43.6246183104813 1.64893623712971 0.296157690892575
43.6448419261724 1.43617027104846 0.276391097530654
43.6650655418634 1.27659579648752 0.260584025764691
43.6852891575545 1.54255325408908 0.286444948174184
43.7055127732456 1.43617027104846 0.276391097530654
43.7257363889366 1.06382983040626 0.237879581728048
43.7459600046277 1.17021281344689 0.249490210115391
43.7661836203188 1.32978728800783 0.265957457601566
43.7864072360098 1.32978728800783 0.265957457601566
43.8066308517009 1.06382983040626 0.237879581728048
43.826854467392 1.59574474560939 0.291341797730203
43.847078083083 1.75531922017033 0.305561855301235
43.8673016987741 1.54255325408908 0.286444948174184
43.8875253144652 0.851063864325011 0.212765966081253
43.9077489301562 1.38297877952814 0.271224453219182
43.9279725458473 1.38297877952814 0.271224453219182
43.9481961615384 0.957446847365637 0.225672386132641
43.9684197772294 1.11702132192658 0.243754036219437
43.9886433929205 1.17021281344689 0.249490210115391
44.0088670086116 1.64893623712971 0.296157690892575
44.0290906243026 1.43617027104846 0.276391097530654
44.0493142399937 1.96808518625159 0.323551211550436
44.0695378556848 1.06382983040626 0.237879581728048
44.0897614713758 1.38297877952814 0.271224453219182
44.1099850870669 0.957446847365637 0.225672386132641
44.130208702758 1.32978728800783 0.265957457601566
44.150432318449 1.48936176256877 0.281462916854699
44.1706559341401 0.691489389764071 0.191784650094897
44.1908795498312 1.32978728800783 0.265957457601566
44.2111031655222 1.11702132192658 0.243754036219437
44.2313267812133 1.86170220321096 0.314685107616239
44.2515503969043 1.27659579648752 0.260584025764691
44.2717740125954 1.48936176256877 0.281462916854699
44.2919976282865 1.2234043049672 0.255097431805139
44.3122212439775 1.54255325408908 0.286444948174184
44.3324448596686 1.06382983040626 0.237879581728048
44.3526684753597 1.01063833888595 0.231856336193246
44.3728920910507 1.75531922017033 0.305561855301235
44.3931157067418 1.48936176256877 0.281462916854699
44.4133393224329 1.43617027104846 0.276391097530654
44.4335629381239 1.38297877952814 0.271224453219182
44.453786553815 1.2234043049672 0.255097431805139
44.4740101695061 2.0212766777719 0.327894375166624
44.4942337851971 1.48936176256877 0.281462916854699
44.5144574008882 1.70212772865002 0.300896514843521
44.5346810165793 1.01063833888595 0.231856336193246
44.5549046322703 1.86170220321096 0.314685107616239
44.5751282479614 1.96808518625159 0.323551211550436
44.5953518636525 1.17021281344689 0.249490210115391
44.6155754793435 1.86170220321096 0.314685107616239
44.6357990950346 1.32978728800783 0.265957457601566
44.6560227107257 1.27659579648752 0.260584025764691
44.6762463264167 0.904255355845324 0.219314137922397
44.6964699421078 1.80851071169065 0.310157028270018
44.7166935577989 1.17021281344689 0.249490210115391
44.7369171734899 1.59574474560939 0.291341797730203
44.757140789181 1.17021281344689 0.249490210115391
44.7773644048721 1.75531922017033 0.305561855301235
44.7975880205631 1.38297877952814 0.271224453219182
44.8178116362542 1.48936176256877 0.281462916854699
44.8380352519453 1.43617027104846 0.276391097530654
44.8582588676363 1.64893623712971 0.296157690892575
44.8784824833274 1.91489369473127 0.319148949121879
44.8987060990185 1.11702132192658 0.243754036219437
44.9189297147095 0.851063864325011 0.212765966081253
44.9391533304006 1.59574474560939 0.291341797730203
44.9593769460917 1.64893623712971 0.296157690892575
44.9796005617827 1.91489369473127 0.319148949121879
44.9998241774738 1.43617027104846 0.276391097530654
45.0200477931648 1.43617027104846 0.276391097530654
45.0402714088559 1.27659579648752 0.260584025764691
45.060495024547 1.80851071169065 0.310157028270018
45.080718640238 1.48936176256877 0.281462916854699
45.1009422559291 1.38297877952814 0.271224453219182
45.1211658716202 2.0212766777719 0.327894375166624
45.1413894873112 1.59574474560939 0.291341797730203
45.1616131030023 1.17021281344689 0.249490210115391
45.1818367186934 1.70212772865002 0.300896514843521
45.2020603343844 1.11702132192658 0.243754036219437
45.2222839500755 1.43617027104846 0.276391097530654
45.2425075657666 1.2234043049672 0.255097431805139
45.2627311814576 1.27659579648752 0.260584025764691
45.2829547971487 1.86170220321096 0.314685107616239
45.3031784128398 1.86170220321096 0.314685107616239
45.3234020285308 1.11702132192658 0.243754036219437
45.3436256442219 1.2234043049672 0.255097431805139
45.363849259913 1.38297877952814 0.271224453219182
45.384072875604 1.64893623712971 0.296157690892575
45.4042964912951 1.59574474560939 0.291341797730203
45.4245201069862 1.2234043049672 0.255097431805139
45.4447437226772 1.38297877952814 0.271224453219182
45.4649673383683 1.43617027104846 0.276391097530654
45.4851909540594 2.34042562689378 0.352832438824499
45.5054145697504 1.27659579648752 0.260584025764691
45.5256381854415 1.91489369473127 0.319148949121879
45.5458618011326 2.44680860993441 0.360762247785373
45.5660854168236 3.08510650817816 0.405094330581189
45.5863090325147 2.65957457601566 0.376120643554402
45.6065326482058 3.08510650817816 0.405094330581189
45.6267562638968 3.13829799969848 0.408571598914043
45.6469798795879 2.97872352513754 0.398048674321006
45.667203495279 3.6170214233813 0.438628275844795
45.68742711097 2.8191490505766 0.387239903442613
45.7076507266611 2.76595755905628 0.383569300189794
45.7278743423522 2.12765966081253 0.336412530691444
45.7480979580432 2.18085115233284 0.340591728578921
45.7683215737343 2.34042562689378 0.352832438824499
45.7885451894253 1.48936176256877 0.281462916854699
45.8087688051164 1.38297877952814 0.271224453219182
45.8289924208075 1.80851071169065 0.310157028270018
45.8492160364985 1.11702132192658 0.243754036219437
45.8694396521896 1.01063833888595 0.231856336193246
45.8896632678807 1.11702132192658 0.243754036219437
45.9098868835717 1.70212772865002 0.300896514843521
45.9301104992628 1.96808518625159 0.323551211550436
45.9503341149539 1.32978728800783 0.265957457601566
45.9705577306449 1.17021281344689 0.249490210115391
45.990781346336 1.59574474560939 0.291341797730203
46.0110049620271 1.54255325408908 0.286444948174184
46.0312285777181 0.904255355845324 0.219314137922397
46.0514521934092 1.59574474560939 0.291341797730203
46.0716758091003 1.32978728800783 0.265957457601566
46.0918994247913 1.11702132192658 0.243754036219437
46.1121230404824 1.17021281344689 0.249490210115391
46.1323466561735 1.48936176256877 0.281462916854699
46.1525702718645 1.54255325408908 0.286444948174184
46.1727938875556 1.43617027104846 0.276391097530654
46.1930175032467 0.744680881284384 0.199024337160503
46.2132411189377 1.75531922017033 0.305561855301235
46.2334647346288 0.904255355845324 0.219314137922397
46.2536883503199 0.904255355845324 0.219314137922397
46.2739119660109 1.2234043049672 0.255097431805139
46.294135581702 1.11702132192658 0.243754036219437
46.3143591973931 1.17021281344689 0.249490210115391
46.3345828130841 1.43617027104846 0.276391097530654
46.3548064287752 1.70212772865002 0.300896514843521
46.3750300444663 1.27659579648752 0.260584025764691
46.3952536601573 0.851063864325011 0.212765966081253
46.4154772758484 1.11702132192658 0.243754036219437
46.4357008915395 0.851063864325011 0.212765966081253
46.4559245072305 0.797872372804697 0.206009760818106
46.4761481229216 1.64893623712971 0.296157690892575
46.4963717386127 1.2234043049672 0.255097431805139
46.5165953543037 1.32978728800783 0.265957457601566
46.5368189699948 0.691489389764071 0.191784650094897
46.5570425856858 1.43617027104846 0.276391097530654
46.5772662013769 1.38297877952814 0.271224453219182
46.597489817068 1.11702132192658 0.243754036219437
46.617713432759 1.38297877952814 0.271224453219182
46.6379370484501 1.27659579648752 0.260584025764691
46.6581606641412 1.17021281344689 0.249490210115391
46.6783842798322 1.32978728800783 0.265957457601566
46.6986078955233 1.80851071169065 0.310157028270018
46.7188315112144 1.59574474560939 0.291341797730203
46.7390551269054 1.17021281344689 0.249490210115391
46.7592787425965 1.38297877952814 0.271224453219182
46.7795023582876 1.17021281344689 0.249490210115391
46.7997259739786 1.75531922017033 0.305561855301235
46.8199495896697 1.27659579648752 0.260584025764691
46.8401732053608 1.32978728800783 0.265957457601566
46.8603968210518 1.54255325408908 0.286444948174184
46.8806204367429 1.27659579648752 0.260584025764691
46.900844052434 1.59574474560939 0.291341797730203
46.921067668125 1.32978728800783 0.265957457601566
46.9412912838161 1.91489369473127 0.319148949121879
46.9615148995072 1.59574474560939 0.291341797730203
46.9817385151982 1.32978728800783 0.265957457601566
47.0019621308893 1.48936176256877 0.281462916854699
47.0221857465804 1.48936176256877 0.281462916854699
47.0424093622714 1.17021281344689 0.249490210115391
47.0626329779625 1.80851071169065 0.310157028270018
47.0828565936536 0.957446847365637 0.225672386132641
47.1030802093446 1.91489369473127 0.319148949121879
47.1233038250357 1.59574474560939 0.291341797730203
47.1435274407268 1.32978728800783 0.265957457601566
47.1637510564178 1.64893623712971 0.296157690892575
47.1839746721089 1.38297877952814 0.271224453219182
47.2041982878 1.48936176256877 0.281462916854699
47.224421903491 1.17021281344689 0.249490210115391
47.2446455191821 1.2234043049672 0.255097431805139
47.2648691348732 1.48936176256877 0.281462916854699
47.2850927505642 1.11702132192658 0.243754036219437
47.3053163662553 1.43617027104846 0.276391097530654
47.3255399819463 0.957446847365637 0.225672386132641
47.3457635976374 1.38297877952814 0.271224453219182
47.3659872133285 1.54255325408908 0.286444948174184
47.3862108290195 1.64893623712971 0.296157690892575
47.4064344447106 1.38297877952814 0.271224453219182
47.4266580604017 2.50000010145472 0.364662493543428
47.4468816760927 1.32978728800783 0.265957457601566
47.4671052917838 1.80851071169065 0.310157028270018
47.4873289074749 1.48936176256877 0.281462916854699
47.5075525231659 1.86170220321096 0.314685107616239
47.527776138857 2.0212766777719 0.327894375166624
47.5479997545481 1.32978728800783 0.265957457601566
47.5682233702391 1.32978728800783 0.265957457601566
47.5884469859302 1.86170220321096 0.314685107616239
47.6086706016213 1.27659579648752 0.260584025764691
47.6288942173123 1.17021281344689 0.249490210115391
47.6491178330034 1.70212772865002 0.300896514843521
47.6693414486945 1.17021281344689 0.249490210115391
47.6895650643855 1.54255325408908 0.286444948174184
47.7097886800766 1.32978728800783 0.265957457601566
47.7300122957677 1.59574474560939 0.291341797730203
47.7502359114587 1.54255325408908 0.286444948174184
47.7704595271498 1.80851071169065 0.310157028270018
47.7906831428409 1.59574474560939 0.291341797730203
47.8109067585319 1.2234043049672 0.255097431805139
47.831130374223 1.48936176256877 0.281462916854699
47.8513539899141 2.0212766777719 0.327894375166624
47.8715776056051 1.48936176256877 0.281462916854699
47.8918012212962 1.64893623712971 0.296157690892575
47.9120248369873 2.0212766777719 0.327894375166624
47.9322484526783 1.38297877952814 0.271224453219182
47.9524720683694 1.75531922017033 0.305561855301235
47.9726956840605 1.43617027104846 0.276391097530654
47.9929192997515 1.17021281344689 0.249490210115391
48.0131429154426 1.32978728800783 0.265957457601566
48.0333665311337 1.11702132192658 0.243754036219437
48.0535901468247 1.59574474560939 0.291341797730203
48.0738137625158 1.32978728800783 0.265957457601566
48.0940373782068 1.2234043049672 0.255097431805139
48.1142609938979 1.91489369473127 0.319148949121879
48.134484609589 1.75531922017033 0.305561855301235
48.15470822528 1.2234043049672 0.255097431805139
48.1749318409711 1.54255325408908 0.286444948174184
48.1951554566622 0.797872372804697 0.206009760818106
48.2153790723532 1.64893623712971 0.296157690892575
48.2356026880443 1.17021281344689 0.249490210115391
48.2558263037354 1.54255325408908 0.286444948174184
48.2760499194264 1.01063833888595 0.231856336193246
48.2962735351175 1.32978728800783 0.265957457601566
48.3164971508086 1.17021281344689 0.249490210115391
48.3367207664996 1.64893623712971 0.296157690892575
48.3569443821907 1.64893623712971 0.296157690892575
48.3771679978818 1.70212772865002 0.300896514843521
48.3973916135728 1.11702132192658 0.243754036219437
48.4176152292639 1.48936176256877 0.281462916854699
48.437838844955 1.64893623712971 0.296157690892575
48.458062460646 1.43617027104846 0.276391097530654
48.4782860763371 1.11702132192658 0.243754036219437
48.4985096920282 1.32978728800783 0.265957457601566
48.5187333077192 1.38297877952814 0.271224453219182
48.5389569234103 1.11702132192658 0.243754036219437
48.5591805391014 1.48936176256877 0.281462916854699
48.5794041547924 1.43617027104846 0.276391097530654
48.5996277704835 1.06382983040626 0.237879581728048
48.6198513861746 0.851063864325011 0.212765966081253
48.6400750018656 1.11702132192658 0.243754036219437
48.6602986175567 1.48936176256877 0.281462916854699
48.6805222332478 1.32978728800783 0.265957457601566
48.7007458489388 1.38297877952814 0.271224453219182
48.7209694646299 0.904255355845324 0.219314137922397
48.741193080321 1.48936176256877 0.281462916854699
48.761416696012 0.957446847365637 0.225672386132641
48.7816403117031 1.59574474560939 0.291341797730203
48.8018639273942 1.11702132192658 0.243754036219437
48.8220875430852 1.43617027104846 0.276391097530654
48.8423111587763 1.48936176256877 0.281462916854699
48.8625347744673 0.851063864325011 0.212765966081253
48.8827583901584 1.54255325408908 0.286444948174184
48.9029820058495 1.32978728800783 0.265957457601566
48.9232056215405 1.11702132192658 0.243754036219437
48.9434292372316 1.43617027104846 0.276391097530654
48.9636528529227 1.38297877952814 0.271224453219182
48.9838764686137 1.43617027104846 0.276391097530654
49.0041000843048 1.70212772865002 0.300896514843521
49.0243236999959 1.48936176256877 0.281462916854699
49.0445473156869 1.17021281344689 0.249490210115391
49.064770931378 1.06382983040626 0.237879581728048
49.0849945470691 1.27659579648752 0.260584025764691
49.1052181627601 1.17021281344689 0.249490210115391
49.1254417784512 1.64893623712971 0.296157690892575
49.1456653941423 1.54255325408908 0.286444948174184
49.1658890098333 1.01063833888595 0.231856336193246
49.1861126255244 1.38297877952814 0.271224453219182
49.2063362412155 1.27659579648752 0.260584025764691
49.2265598569065 1.27659579648752 0.260584025764691
49.2467834725976 0.851063864325011 0.212765966081253
49.2670070882887 1.48936176256877 0.281462916854699
49.2872307039797 1.43617027104846 0.276391097530654
49.3074543196708 1.17021281344689 0.249490210115391
49.3276779353619 1.38297877952814 0.271224453219182
49.3479015510529 1.01063833888595 0.231856336193246
49.368125166744 1.17021281344689 0.249490210115391
49.3883487824351 2.23404264385315 0.34472026390471
49.4085723981261 1.32978728800783 0.265957457601566
49.4287960138172 1.54255325408908 0.286444948174184
49.4490196295083 1.27659579648752 0.260584025764691
49.4692432451993 1.54255325408908 0.286444948174184
49.4894668608904 1.27659579648752 0.260584025764691
49.5096904765815 1.59574474560939 0.291341797730203
49.5299140922725 1.43617027104846 0.276391097530654
49.5501377079636 1.48936176256877 0.281462916854699
49.5703613236547 1.64893623712971 0.296157690892575
49.5905849393457 1.32978728800783 0.265957457601566
49.6108085550368 1.32978728800783 0.265957457601566
49.6310321707278 1.38297877952814 0.271224453219182
49.6512557864189 1.11702132192658 0.243754036219437
49.67147940211 1.54255325408908 0.286444948174184
49.691703017801 1.2234043049672 0.255097431805139
49.7119266334921 1.27659579648752 0.260584025764691
49.7321502491832 1.43617027104846 0.276391097530654
49.7523738648742 1.38297877952814 0.271224453219182
49.7725974805653 1.43617027104846 0.276391097530654
49.7928210962564 1.2234043049672 0.255097431805139
49.8130447119474 1.27659579648752 0.260584025764691
49.8332683276385 1.75531922017033 0.305561855301235
49.8534919433296 1.17021281344689 0.249490210115391
49.8737155590206 1.38297877952814 0.271224453219182
49.8939391747117 1.54255325408908 0.286444948174184
49.9141627904028 1.2234043049672 0.255097431805139
49.9343864060938 1.43617027104846 0.276391097530654
49.9546100217849 1.27659579648752 0.260584025764691
49.974833637476 1.2234043049672 0.255097431805139
49.995057253167 1.32978728800783 0.265957457601566
50.0152808688581 1.43617027104846 0.276391097530654
50.0355044845492 1.17021281344689 0.249490210115391
50.0557281002402 0.797872372804697 0.206009760818106
50.0759517159313 1.17021281344689 0.249490210115391
50.0961753316224 0.904255355845324 0.219314137922397
50.1163989473134 1.11702132192658 0.243754036219437
50.1366225630045 1.17021281344689 0.249490210115391
50.1568461786956 1.17021281344689 0.249490210115391
50.1770697943866 1.48936176256877 0.281462916854699
50.1972934100777 1.2234043049672 0.255097431805139
50.2175170257688 1.38297877952814 0.271224453219182
50.2377406414598 0.957446847365637 0.225672386132641
50.2579642571509 1.54255325408908 0.286444948174184
50.278187872842 1.11702132192658 0.243754036219437
50.298411488533 1.2234043049672 0.255097431805139
50.3186351042241 1.17021281344689 0.249490210115391
50.3388587199152 1.48936176256877 0.281462916854699
50.3590823356062 1.48936176256877 0.281462916854699
50.3793059512973 1.91489369473127 0.319148949121879
50.3995295669883 1.27659579648752 0.260584025764691
50.4197531826794 1.54255325408908 0.286444948174184
50.4399767983705 1.48936176256877 0.281462916854699
50.4602004140615 1.2234043049672 0.255097431805139
50.4804240297526 1.48936176256877 0.281462916854699
50.5006476454437 1.32978728800783 0.265957457601566
50.5208712611347 0.957446847365637 0.225672386132641
50.5410948768258 1.64893623712971 0.296157690892575
50.5613184925169 2.18085115233284 0.340591728578921
50.5815421082079 1.11702132192658 0.243754036219437
50.601765723899 1.38297877952814 0.271224453219182
50.6219893395901 1.01063833888595 0.231856336193246
50.6422129552811 1.80851071169065 0.310157028270018
50.6624365709722 1.27659579648752 0.260584025764691
50.6826601866633 1.43617027104846 0.276391097530654
50.7028838023543 1.38297877952814 0.271224453219182
50.7231074180454 1.38297877952814 0.271224453219182
50.7433310337365 1.96808518625159 0.323551211550436
50.7635546494275 1.80851071169065 0.310157028270018
50.7837782651186 1.01063833888595 0.231856336193246
50.8040018808097 1.80851071169065 0.310157028270018
50.8242254965007 1.43617027104846 0.276391097530654
50.8444491121918 1.38297877952814 0.271224453219182
50.8646727278829 1.48936176256877 0.281462916854699
50.8848963435739 1.32978728800783 0.265957457601566
50.905119959265 1.27659579648752 0.260584025764691
50.9253435749561 1.32978728800783 0.265957457601566
50.9455671906471 1.43617027104846 0.276391097530654
50.9657908063382 1.06382983040626 0.237879581728048
50.9860144220293 1.80851071169065 0.310157028270018
51.0062380377203 1.32978728800783 0.265957457601566
51.0264616534114 2.12765966081253 0.336412530691444
51.0466852691025 1.70212772865002 0.300896514843521
51.0669088847935 1.11702132192658 0.243754036219437
51.0871325004846 1.80851071169065 0.310157028270018
51.1073561161757 1.2234043049672 0.255097431805139
51.1275797318667 1.43617027104846 0.276391097530654
51.1478033475578 1.2234043049672 0.255097431805139
51.1680269632488 1.86170220321096 0.314685107616239
51.1882505789399 1.32978728800783 0.265957457601566
51.208474194631 1.48936176256877 0.281462916854699
51.228697810322 1.32978728800783 0.265957457601566
51.2489214260131 1.43617027104846 0.276391097530654
51.2691450417042 1.38297877952814 0.271224453219182
51.2893686573952 1.2234043049672 0.255097431805139
51.3095922730863 1.2234043049672 0.255097431805139
51.3298158887774 1.43617027104846 0.276391097530654
51.3500395044684 1.17021281344689 0.249490210115391
51.3702631201595 1.01063833888595 0.231856336193246
51.3904867358506 1.32978728800783 0.265957457601566
51.4107103515416 1.17021281344689 0.249490210115391
51.4309339672327 1.01063833888595 0.231856336193246
51.4511575829238 1.43617027104846 0.276391097530654
51.4713811986148 0.957446847365637 0.225672386132641
51.4916048143059 1.54255325408908 0.286444948174184
51.511828429997 0.851063864325011 0.212765966081253
51.532052045688 1.48936176256877 0.281462916854699
51.5522756613791 1.2234043049672 0.255097431805139
51.5724992770702 1.11702132192658 0.243754036219437
51.5927228927612 1.32978728800783 0.265957457601566
51.6129465084523 1.27659579648752 0.260584025764691
51.6331701241434 1.96808518625159 0.323551211550436
51.6533937398344 1.2234043049672 0.255097431805139
51.6736173555255 1.38297877952814 0.271224453219182
51.6938409712166 1.17021281344689 0.249490210115391
51.7140645869076 1.38297877952814 0.271224453219182
51.7342882025987 1.38297877952814 0.271224453219182
51.7545118182898 1.54255325408908 0.286444948174184
51.7747354339808 1.32978728800783 0.265957457601566
51.7949590496719 1.64893623712971 0.296157690892575
51.815182665363 1.59574474560939 0.291341797730203
51.835406281054 1.11702132192658 0.243754036219437
51.8556298967451 1.27659579648752 0.260584025764691
51.8758535124362 1.86170220321096 0.314685107616239
51.8960771281272 1.11702132192658 0.243754036219437
51.9163007438183 1.80851071169065 0.310157028270018
51.9365243595093 1.01063833888595 0.231856336193246
51.9567479752004 1.38297877952814 0.271224453219182
51.9769715908915 1.70212772865002 0.300896514843521
51.9971952065825 1.43617027104846 0.276391097530654
52.0174188222736 1.38297877952814 0.271224453219182
52.0376424379647 1.38297877952814 0.271224453219182
52.0578660536557 1.32978728800783 0.265957457601566
52.0780896693468 1.38297877952814 0.271224453219182
52.0983132850379 1.32978728800783 0.265957457601566
52.1185369007289 1.43617027104846 0.276391097530654
52.13876051642 0.957446847365637 0.225672386132641
52.1589841321111 1.75531922017033 0.305561855301235
52.1792077478021 1.48936176256877 0.281462916854699
52.1994313634932 1.27659579648752 0.260584025764691
52.2196549791843 1.54255325408908 0.286444948174184
52.2398785948753 1.2234043049672 0.255097431805139
52.2601022105664 1.2234043049672 0.255097431805139
52.2803258262575 1.64893623712971 0.296157690892575
52.3005494419485 1.48936176256877 0.281462916854699
52.3207730576396 1.2234043049672 0.255097431805139
52.3409966733307 0.904255355845324 0.219314137922397
52.3612202890217 1.70212772865002 0.300896514843521
52.3814439047128 1.59574474560939 0.291341797730203
52.4016675204039 1.17021281344689 0.249490210115391
52.4218911360949 1.01063833888595 0.231856336193246
52.442114751786 1.06382983040626 0.237879581728048
52.4623383674771 1.59574474560939 0.291341797730203
52.4825619831681 1.70212772865002 0.300896514843521
52.5027855988592 1.70212772865002 0.300896514843521
52.5230092145503 1.27659579648752 0.260584025764691
52.5432328302413 1.86170220321096 0.314685107616239
52.5634564459324 2.34042562689378 0.352832438824499
52.5836800616235 1.11702132192658 0.243754036219437
52.6039036773145 1.86170220321096 0.314685107616239
52.6241272930056 0.957446847365637 0.225672386132641
52.6443509086967 1.48936176256877 0.281462916854699
52.6645745243877 1.48936176256877 0.281462916854699
52.6847981400788 1.75531922017033 0.305561855301235
52.7050217557698 1.54255325408908 0.286444948174184
52.7252453714609 1.38297877952814 0.271224453219182
52.745468987152 2.0212766777719 0.327894375166624
52.765692602843 1.96808518625159 0.323551211550436
52.7859162185341 1.70212772865002 0.300896514843521
52.8061398342252 1.27659579648752 0.260584025764691
52.8263634499162 1.59574474560939 0.291341797730203
52.8465870656073 1.43617027104846 0.276391097530654
52.8668106812984 1.59574474560939 0.291341797730203
52.8870342969894 1.86170220321096 0.314685107616239
52.9072579126805 2.0212766777719 0.327894375166624
52.9274815283716 1.48936176256877 0.281462916854699
52.9477051440626 1.96808518625159 0.323551211550436
52.9679287597537 1.11702132192658 0.243754036219437
52.9881523754448 2.28723413537347 0.348799935660385
53.0083759911358 2.07446816929221 0.332180758076181
53.0285996068269 1.70212772865002 0.300896514843521
53.048823222518 1.80851071169065 0.310157028270018
53.069046838209 2.0212766777719 0.327894375166624
53.0892704539001 1.64893623712971 0.296157690892575
53.1094940695912 2.12765966081253 0.336412530691444
53.1297176852822 1.96808518625159 0.323551211550436
53.1499413009733 1.80851071169065 0.310157028270018
53.1701649166644 1.96808518625159 0.323551211550436
53.1903885323554 2.07446816929221 0.332180758076181
53.2106121480465 2.23404264385315 0.34472026390471
53.2308357637376 2.18085115233284 0.340591728578921
53.2510593794286 2.12765966081253 0.336412530691444
53.2712829951197 2.12765966081253 0.336412530691444
53.2915066108108 2.23404264385315 0.34472026390471
53.3117302265018 2.0212766777719 0.327894375166624
53.3319538421929 2.18085115233284 0.340591728578921
53.352177457884 2.18085115233284 0.340591728578921
53.372401073575 1.96808518625159 0.323551211550436
53.3926246892661 2.18085115233284 0.340591728578921
53.4128483049572 1.75531922017033 0.305561855301235
53.4330719206482 2.12765966081253 0.336412530691444
53.4532955363393 2.12765966081253 0.336412530691444
53.4735191520303 2.60638308449535 0.372340440642192
53.4937427677214 1.43617027104846 0.276391097530654
53.5139663834125 1.59574474560939 0.291341797730203
53.5341899991035 1.70212772865002 0.300896514843521
53.5544136147946 1.64893623712971 0.296157690892575
53.5746372304857 1.96808518625159 0.323551211550436
53.5948608461767 1.27659579648752 0.260584025764691
53.6150844618678 1.2234043049672 0.255097431805139
53.6353080775589 1.75531922017033 0.305561855301235
53.6555316932499 1.27659579648752 0.260584025764691
53.675755308941 1.2234043049672 0.255097431805139
53.6959789246321 1.54255325408908 0.286444948174184
53.7162025403231 1.54255325408908 0.286444948174184
53.7364261560142 1.48936176256877 0.281462916854699
53.7566497717053 1.59574474560939 0.291341797730203
53.7768733873963 1.38297877952814 0.271224453219182
53.7970970030874 1.38297877952814 0.271224453219182
53.8173206187785 1.54255325408908 0.286444948174184
53.8375442344695 1.2234043049672 0.255097431805139
53.8577678501606 1.32978728800783 0.265957457601566
53.8779914658517 1.48936176256877 0.281462916854699
53.8982150815427 1.2234043049672 0.255097431805139
53.9184386972338 1.17021281344689 0.249490210115391
53.9386623129249 1.59574474560939 0.291341797730203
53.9588859286159 1.2234043049672 0.255097431805139
53.979109544307 1.75531922017033 0.305561855301235
53.9993331599981 1.54255325408908 0.286444948174184
54.0195567756891 1.43617027104846 0.276391097530654
54.0397803913802 1.54255325408908 0.286444948174184
54.0600040070713 1.48936176256877 0.281462916854699
54.0802276227623 1.48936176256877 0.281462916854699
54.1004512384534 1.64893623712971 0.296157690892575
54.1206748541445 1.70212772865002 0.300896514843521
54.1408984698355 1.27659579648752 0.260584025764691
54.1611220855266 1.27659579648752 0.260584025764691
54.1813457012177 1.86170220321096 0.314685107616239
54.2015693169087 1.32978728800783 0.265957457601566
54.2217929325998 1.80851071169065 0.310157028270018
54.2420165482908 1.38297877952814 0.271224453219182
54.2622401639819 1.64893623712971 0.296157690892575
54.282463779673 1.01063833888595 0.231856336193246
54.302687395364 1.48936176256877 0.281462916854699
54.3229110110551 1.80851071169065 0.310157028270018
54.3431346267462 1.43617027104846 0.276391097530654
54.3633582424372 1.48936176256877 0.281462916854699
54.3835818581283 1.32978728800783 0.265957457601566
54.4038054738194 1.38297877952814 0.271224453219182
54.4240290895104 1.70212772865002 0.300896514843521
54.4442527052015 1.17021281344689 0.249490210115391
54.4644763208926 1.2234043049672 0.255097431805139
54.4846999365836 1.86170220321096 0.314685107616239
54.5049235522747 1.11702132192658 0.243754036219437
54.5251471679658 1.75531922017033 0.305561855301235
54.5453707836568 1.59574474560939 0.291341797730203
54.5655943993479 1.32978728800783 0.265957457601566
54.585818015039 1.48936176256877 0.281462916854699
54.60604163073 1.2234043049672 0.255097431805139
54.6262652464211 1.48936176256877 0.281462916854699
54.6464888621122 1.27659579648752 0.260584025764691
54.6667124778032 1.48936176256877 0.281462916854699
54.6869360934943 1.06382983040626 0.237879581728048
54.7071597091854 1.38297877952814 0.271224453219182
54.7273833248764 1.27659579648752 0.260584025764691
54.7476069405675 1.38297877952814 0.271224453219182
54.7678305562586 1.2234043049672 0.255097431805139
54.7880541719496 1.64893623712971 0.296157690892575
54.8082777876407 0.904255355845324 0.219314137922397
54.8285014033318 1.27659579648752 0.260584025764691
54.8487250190228 1.17021281344689 0.249490210115391
54.8689486347139 1.27659579648752 0.260584025764691
54.889172250405 1.17021281344689 0.249490210115391
54.909395866096 2.12765966081253 0.336412530691444
54.9296194817871 1.48936176256877 0.281462916854699
54.9498430974782 1.48936176256877 0.281462916854699
54.9700667131692 0.904255355845324 0.219314137922397
54.9902903288603 1.2234043049672 0.255097431805139
55.0105139445513 1.48936176256877 0.281462916854699
55.0307375602424 1.43617027104846 0.276391097530654
55.0509611759335 1.17021281344689 0.249490210115391
55.0711847916245 1.17021281344689 0.249490210115391
55.0914084073156 1.70212772865002 0.300896514843521
55.1116320230067 1.11702132192658 0.243754036219437
55.1318556386977 1.01063833888595 0.231856336193246
55.1520792543888 1.11702132192658 0.243754036219437
55.1723028700799 1.80851071169065 0.310157028270018
55.1925264857709 0.957446847365637 0.225672386132641
55.212750101462 1.32978728800783 0.265957457601566
55.2329737171531 1.48936176256877 0.281462916854699
55.2531973328441 1.01063833888595 0.231856336193246
55.2734209485352 1.64893623712971 0.296157690892575
55.2936445642263 1.27659579648752 0.260584025764691
55.3138681799173 0.957446847365637 0.225672386132641
55.3340917956084 1.17021281344689 0.249490210115391
55.3543154112995 0.957446847365637 0.225672386132641
55.3745390269905 1.27659579648752 0.260584025764691
55.3947626426816 1.27659579648752 0.260584025764691
55.4149862583727 1.48936176256877 0.281462916854699
55.4352098740637 1.01063833888595 0.231856336193246
55.4554334897548 1.11702132192658 0.243754036219437
55.4756571054459 1.54255325408908 0.286444948174184
55.4958807211369 1.17021281344689 0.249490210115391
55.516104336828 1.38297877952814 0.271224453219182
55.5363279525191 1.80851071169065 0.310157028270018
55.5565515682101 1.17021281344689 0.249490210115391
55.5767751839012 1.38297877952814 0.271224453219182
55.5969987995923 1.43617027104846 0.276391097530654
55.6172224152833 1.59574474560939 0.291341797730203
55.6374460309744 1.43617027104846 0.276391097530654
55.6576696466655 1.2234043049672 0.255097431805139
55.6778932623565 1.43617027104846 0.276391097530654
55.6981168780476 1.96808518625159 0.323551211550436
55.7183404937387 1.32978728800783 0.265957457601566
55.7385641094297 1.54255325408908 0.286444948174184
55.7587877251208 1.54255325408908 0.286444948174184
55.7790113408118 0.957446847365637 0.225672386132641
55.7992349565029 1.43617027104846 0.276391097530654
55.819458572194 1.32978728800783 0.265957457601566
55.839682187885 1.32978728800783 0.265957457601566
55.8599058035761 1.27659579648752 0.260584025764691
55.8801294192672 1.38297877952814 0.271224453219182
55.9003530349582 0.797872372804697 0.206009760818106
55.9205766506493 0.957446847365637 0.225672386132641
55.9408002663404 0.957446847365637 0.225672386132641
55.9610238820314 1.48936176256877 0.281462916854699
55.9812474977225 1.59574474560939 0.291341797730203
56.0014711134136 1.32978728800783 0.265957457601566
56.0216947291046 1.70212772865002 0.300896514843521
56.0419183447957 1.27659579648752 0.260584025764691
56.0621419604868 1.17021281344689 0.249490210115391
56.0823655761778 1.11702132192658 0.243754036219437
56.1025891918689 1.38297877952814 0.271224453219182
56.12281280756 0.957446847365637 0.225672386132641
56.143036423251 1.11702132192658 0.243754036219437
56.1632600389421 0.797872372804697 0.206009760818106
56.1834836546332 1.17021281344689 0.249490210115391
56.2037072703242 1.70212772865002 0.300896514843521
56.2239308860153 1.06382983040626 0.237879581728048
56.2441545017064 0.691489389764071 0.191784650094897
56.2643781173974 1.11702132192658 0.243754036219437
56.2846017330885 1.11702132192658 0.243754036219437
56.3048253487796 1.11702132192658 0.243754036219437
56.3250489644706 1.38297877952814 0.271224453219182
56.3452725801617 1.17021281344689 0.249490210115391
56.3654961958528 1.2234043049672 0.255097431805139
56.3857198115438 0.797872372804697 0.206009760818106
56.4059434272349 1.32978728800783 0.265957457601566
56.426167042926 1.01063833888595 0.231856336193246
56.446390658617 0.851063864325011 0.212765966081253
56.4666142743081 1.32978728800783 0.265957457601566
56.4868378899992 1.75531922017033 0.305561855301235
56.5070615056902 1.17021281344689 0.249490210115391
56.5272851213813 1.70212772865002 0.300896514843521
56.5475087370723 1.32978728800783 0.265957457601566
56.5677323527634 1.43617027104846 0.276391097530654
56.5879559684545 1.17021281344689 0.249490210115391
56.6081795841455 1.54255325408908 0.286444948174184
56.6284031998366 2.07446816929221 0.332180758076181
56.6486268155277 1.27659579648752 0.260584025764691
56.6688504312187 1.80851071169065 0.310157028270018
56.6890740469098 1.27659579648752 0.260584025764691
56.7092976626009 1.70212772865002 0.300896514843521
56.7295212782919 1.59574474560939 0.291341797730203
56.749744893983 1.27659579648752 0.260584025764691
56.7699685096741 0.957446847365637 0.225672386132641
56.7901921253651 1.38297877952814 0.271224453219182
56.8104157410562 1.27659579648752 0.260584025764691
56.8306393567473 1.70212772865002 0.300896514843521
56.8508629724383 1.17021281344689 0.249490210115391
56.8710865881294 0.744680881284384 0.199024337160503
56.8913102038205 1.38297877952814 0.271224453219182
56.9115338195115 1.59574474560939 0.291341797730203
56.9317574352026 1.11702132192658 0.243754036219437
56.9519810508937 1.32978728800783 0.265957457601566
56.9722046665847 1.43617027104846 0.276391097530654
56.9924282822758 1.32978728800783 0.265957457601566
57.0126518979669 1.32978728800783 0.265957457601566
57.0328755136579 1.59574474560939 0.291341797730203
57.053099129349 1.32978728800783 0.265957457601566
57.0733227450401 1.59574474560939 0.291341797730203
57.0935463607311 1.2234043049672 0.255097431805139
57.1137699764222 1.2234043049672 0.255097431805139
57.1339935921133 0.957446847365637 0.225672386132641
57.1542172078043 2.07446816929221 0.332180758076181
57.1744408234954 1.59574474560939 0.291341797730203
57.1946644391865 1.48936176256877 0.281462916854699
57.2148880548775 1.27659579648752 0.260584025764691
57.2351116705686 1.06382983040626 0.237879581728048
57.2553352862597 1.64893623712971 0.296157690892575
57.2755589019507 1.38297877952814 0.271224453219182
57.2957825176418 1.32978728800783 0.265957457601566
57.3160061333328 1.48936176256877 0.281462916854699
57.3362297490239 1.17021281344689 0.249490210115391
57.356453364715 1.06382983040626 0.237879581728048
57.376676980406 1.01063833888595 0.231856336193246
57.3969005960971 1.01063833888595 0.231856336193246
57.4171242117882 1.64893623712971 0.296157690892575
57.4373478274792 1.2234043049672 0.255097431805139
57.4575714431703 0.957446847365637 0.225672386132641
57.4777950588614 1.17021281344689 0.249490210115391
57.4980186745524 1.17021281344689 0.249490210115391
57.5182422902435 1.27659579648752 0.260584025764691
57.5384659059346 1.01063833888595 0.231856336193246
57.5586895216256 1.11702132192658 0.243754036219437
57.5789131373167 1.32978728800783 0.265957457601566
57.5991367530078 1.59574474560939 0.291341797730203
57.6193603686988 1.96808518625159 0.323551211550436
57.6395839843899 0.904255355845324 0.219314137922397
57.659807600081 0.957446847365637 0.225672386132641
57.680031215772 1.01063833888595 0.231856336193246
57.7002548314631 0.904255355845324 0.219314137922397
57.7204784471542 1.32978728800783 0.265957457601566
57.7407020628452 1.48936176256877 0.281462916854699
57.7609256785363 1.27659579648752 0.260584025764691
57.7811492942274 1.06382983040626 0.237879581728048
57.8013729099184 1.01063833888595 0.231856336193246
57.8215965256095 1.48936176256877 0.281462916854699
57.8418201413006 1.11702132192658 0.243754036219437
57.8620437569916 1.17021281344689 0.249490210115391
57.8822673726827 1.32978728800783 0.265957457601566
57.9024909883738 0.691489389764071 0.191784650094897
57.9227146040648 1.48936176256877 0.281462916854699
57.9429382197559 1.64893623712971 0.296157690892575
57.963161835447 1.32978728800783 0.265957457601566
57.983385451138 1.59574474560939 0.291341797730203
58.0036090668291 1.01063833888595 0.231856336193246
58.0238326825202 1.48936176256877 0.281462916854699
58.0440562982112 1.27659579648752 0.260584025764691
58.0642799139023 1.2234043049672 0.255097431805139
58.0845035295933 0.904255355845324 0.219314137922397
58.1047271452844 1.2234043049672 0.255097431805139
58.1249507609755 1.17021281344689 0.249490210115391
58.1451743766665 1.32978728800783 0.265957457601566
58.1653979923576 0.851063864325011 0.212765966081253
58.1856216080487 1.11702132192658 0.243754036219437
58.2058452237397 1.27659579648752 0.260584025764691
58.2260688394308 1.70212772865002 0.300896514843521
58.2462924551219 0.797872372804697 0.206009760818106
58.2665160708129 1.32978728800783 0.265957457601566
58.286739686504 1.06382983040626 0.237879581728048
58.3069633021951 0.851063864325011 0.212765966081253
58.3271869178861 1.01063833888595 0.231856336193246
58.3474105335772 1.2234043049672 0.255097431805139
58.3676341492683 1.75531922017033 0.305561855301235
58.3878577649593 1.2234043049672 0.255097431805139
58.4080813806504 1.32978728800783 0.265957457601566
58.4283049963415 1.2234043049672 0.255097431805139
58.4485286120325 1.59574474560939 0.291341797730203
58.4687522277236 1.06382983040626 0.237879581728048
58.4889758434147 1.2234043049672 0.255097431805139
58.5091994591057 1.38297877952814 0.271224453219182
58.5294230747968 1.32978728800783 0.265957457601566
58.5496466904879 1.32978728800783 0.265957457601566
58.5698703061789 1.70212772865002 0.300896514843521
58.59009392187 1.64893623712971 0.296157690892575
58.6103175375611 1.2234043049672 0.255097431805139
58.6305411532521 1.64893623712971 0.296157690892575
58.6507647689432 1.2234043049672 0.255097431805139
58.6709883846343 1.48936176256877 0.281462916854699
58.6912120003253 1.17021281344689 0.249490210115391
58.7114356160164 1.32978728800783 0.265957457601566
58.7316592317075 1.27659579648752 0.260584025764691
58.7518828473985 1.38297877952814 0.271224453219182
58.7721064630896 1.86170220321096 0.314685107616239
58.7923300787807 1.43617027104846 0.276391097530654
58.8125536944717 1.64893623712971 0.296157690892575
58.8327773101628 1.43617027104846 0.276391097530654
58.8530009258538 1.48936176256877 0.281462916854699
58.8732245415449 1.48936176256877 0.281462916854699
58.893448157236 1.2234043049672 0.255097431805139
58.913671772927 1.64893623712971 0.296157690892575
58.9338953886181 1.38297877952814 0.271224453219182
58.9541190043092 1.38297877952814 0.271224453219182
58.9743426200002 1.2234043049672 0.255097431805139
58.9945662356913 1.43617027104846 0.276391097530654
59.0147898513824 1.38297877952814 0.271224453219182
59.0350134670734 1.75531922017033 0.305561855301235
59.0552370827645 2.12765966081253 0.336412530691444
59.0754606984556 2.07446816929221 0.332180758076181
59.0956843141466 1.70212772865002 0.300896514843521
59.1159079298377 1.59574474560939 0.291341797730203
59.1361315455288 1.86170220321096 0.314685107616239
59.1563551612198 2.0212766777719 0.327894375166624
59.1765787769109 1.64893623712971 0.296157690892575
59.196802392602 1.11702132192658 0.243754036219437
59.217026008293 1.86170220321096 0.314685107616239
59.2372496239841 1.32978728800783 0.265957457601566
59.2574732396752 1.64893623712971 0.296157690892575
59.2776968553662 1.11702132192658 0.243754036219437
59.2979204710573 1.54255325408908 0.286444948174184
59.3181440867484 1.32978728800783 0.265957457601566
59.3383677024394 1.27659579648752 0.260584025764691
59.3585913181305 1.59574474560939 0.291341797730203
59.3788149338216 1.54255325408908 0.286444948174184
59.3990385495126 1.06382983040626 0.237879581728048
59.4192621652037 1.64893623712971 0.296157690892575
59.4394857808948 1.48936176256877 0.281462916854699
59.4597093965858 1.2234043049672 0.255097431805139
59.4799330122769 1.38297877952814 0.271224453219182
59.500156627968 1.54255325408908 0.286444948174184
59.520380243659 1.01063833888595 0.231856336193246
59.5406038593501 1.06382983040626 0.237879581728048
59.5608274750412 1.11702132192658 0.243754036219437
59.5810510907322 1.54255325408908 0.286444948174184
59.6012747064233 0.957446847365637 0.225672386132641
59.6214983221143 1.17021281344689 0.249490210115391
59.6417219378054 1.48936176256877 0.281462916854699
59.6619455534965 1.27659579648752 0.260584025764691
59.6821691691875 1.59574474560939 0.291341797730203
59.7023927848786 1.11702132192658 0.243754036219437
59.7226164005697 1.38297877952814 0.271224453219182
59.7428400162607 1.48936176256877 0.281462916854699
59.7630636319518 1.17021281344689 0.249490210115391
59.7832872476429 0.797872372804697 0.206009760818106
59.8035108633339 1.17021281344689 0.249490210115391
59.823734479025 1.27659579648752 0.260584025764691
59.8439580947161 1.17021281344689 0.249490210115391
59.8641817104071 1.32978728800783 0.265957457601566
59.8844053260982 1.59574474560939 0.291341797730203
59.9046289417893 1.27659579648752 0.260584025764691
59.9248525574803 1.43617027104846 0.276391097530654
59.9450761731714 1.32978728800783 0.265957457601566
59.9652997888625 0.957446847365637 0.225672386132641
59.9855234045535 0.691489389764071 0.191784650094897
60.0057470202446 1.01063833888595 0.231856336193246
60.0259706359357 1.06382983040626 0.237879581728048
60.0461942516267 1.54255325408908 0.286444948174184
60.0664178673178 1.27659579648752 0.260584025764691
60.0866414830089 1.32978728800783 0.265957457601566
60.1068650986999 1.06382983040626 0.237879581728048
60.127088714391 1.06382983040626 0.237879581728048
60.1473123300821 0.797872372804697 0.206009760818106
60.1675359457731 1.06382983040626 0.237879581728048
60.1877595614642 1.01063833888595 0.231856336193246
60.2079831771553 1.06382983040626 0.237879581728048
60.2282067928463 1.01063833888595 0.231856336193246
60.2484304085374 0.744680881284384 0.199024337160503
60.2686540242285 1.27659579648752 0.260584025764691
60.2888776399195 0.957446847365637 0.225672386132641
60.3091012556106 1.17021281344689 0.249490210115391
60.3293248713017 0.851063864325011 0.212765966081253
60.3495484869927 1.91489369473127 0.319148949121879
60.3697721026838 0.851063864325011 0.212765966081253
60.3899957183748 0.957446847365637 0.225672386132641
60.4102193340659 1.75531922017033 0.305561855301235
60.430442949757 1.01063833888595 0.231856336193246
60.450666565448 0.744680881284384 0.199024337160503
60.4708901811391 1.32978728800783 0.265957457601566
60.4911137968302 0.691489389764071 0.191784650094897
60.5113374125212 1.59574474560939 0.291341797730203
60.5315610282123 1.17021281344689 0.249490210115391
60.5517846439034 1.54255325408908 0.286444948174184
60.5720082595944 1.17021281344689 0.249490210115391
60.5922318752855 1.48936176256877 0.281462916854699
60.6124554909766 0.691489389764071 0.191784650094897
60.6326791066676 1.06382983040626 0.237879581728048
60.6529027223587 1.27659579648752 0.260584025764691
60.6731263380498 1.48936176256877 0.281462916854699
60.6933499537408 1.43617027104846 0.276391097530654
60.7135735694319 0.744680881284384 0.199024337160503
60.733797185123 0.957446847365637 0.225672386132641
60.754020800814 1.2234043049672 0.255097431805139
60.7742444165051 0.957446847365637 0.225672386132641
60.7944680321962 1.06382983040626 0.237879581728048
60.8146916478872 1.01063833888595 0.231856336193246
60.8349152635783 1.2234043049672 0.255097431805139
60.8551388792694 1.27659579648752 0.260584025764691
60.8753624949604 1.32978728800783 0.265957457601566
60.8955861106515 1.2234043049672 0.255097431805139
60.9158097263426 1.11702132192658 0.243754036219437
60.9360333420336 1.59574474560939 0.291341797730203
60.9562569577247 1.54255325408908 0.286444948174184
60.9764805734158 0.851063864325011 0.212765966081253
60.9967041891068 1.48936176256877 0.281462916854699
61.0169278047979 1.2234043049672 0.255097431805139
61.037151420489 1.11702132192658 0.243754036219437
61.05737503618 1.64893623712971 0.296157690892575
61.0775986518711 1.48936176256877 0.281462916854699
61.0978222675622 1.32978728800783 0.265957457601566
61.1180458832532 1.64893623712971 0.296157690892575
61.1382694989443 1.43617027104846 0.276391097530654
61.1584931146353 1.48936176256877 0.281462916854699
61.1787167303264 1.17021281344689 0.249490210115391
61.1989403460175 1.11702132192658 0.243754036219437
61.2191639617085 1.38297877952814 0.271224453219182
61.2393875773996 1.64893623712971 0.296157690892575
61.2596111930907 1.86170220321096 0.314685107616239
61.2798348087817 1.27659579648752 0.260584025764691
61.3000584244728 1.70212772865002 0.300896514843521
61.3202820401639 1.64893623712971 0.296157690892575
61.3405056558549 1.43617027104846 0.276391097530654
61.360729271546 1.2234043049672 0.255097431805139
61.3809528872371 2.0212766777719 0.327894375166624
61.4011765029281 1.43617027104846 0.276391097530654
61.4214001186192 1.64893623712971 0.296157690892575
61.4416237343103 1.38297877952814 0.271224453219182
61.4618473500013 1.54255325408908 0.286444948174184
61.4820709656924 1.54255325408908 0.286444948174184
61.5022945813835 1.17021281344689 0.249490210115391
61.5225181970745 1.01063833888595 0.231856336193246
61.5427418127656 1.70212772865002 0.300896514843521
61.5629654284567 1.27659579648752 0.260584025764691
61.5831890441477 1.43617027104846 0.276391097530654
61.6034126598388 1.54255325408908 0.286444948174184
61.6236362755299 1.27659579648752 0.260584025764691
61.6438598912209 1.75531922017033 0.305561855301235
61.664083506912 0.904255355845324 0.219314137922397
61.6843071226031 1.17021281344689 0.249490210115391
61.7045307382941 1.59574474560939 0.291341797730203
61.7247543539852 0.904255355845324 0.219314137922397
61.7449779696763 0.638297898243758 0.184260731687103
61.7652015853673 1.32978728800783 0.265957457601566
61.7854252010584 1.17021281344689 0.249490210115391
61.8056488167495 1.32978728800783 0.265957457601566
61.8258724324405 1.54255325408908 0.286444948174184
61.8460960481316 1.01063833888595 0.231856336193246
61.8663196638227 0.957446847365637 0.225672386132641
61.8865432795137 1.54255325408908 0.286444948174184
61.9067668952048 1.38297877952814 0.271224453219182
61.9269905108958 0.638297898243758 0.184260731687103
61.9472141265869 1.59574474560939 0.291341797730203
61.967437742278 1.2234043049672 0.255097431805139
61.987661357969 1.2234043049672 0.255097431805139
62.0078849736601 1.32978728800783 0.265957457601566
62.0281085893512 1.06382983040626 0.237879581728048
62.0483322050422 0.851063864325011 0.212765966081253
62.0685558207333 0.904255355845324 0.219314137922397
62.0887794364244 1.59574474560939 0.291341797730203
62.1090030521154 0.851063864325011 0.212765966081253
62.1292266678065 1.27659579648752 0.260584025764691
62.1494502834976 1.06382983040626 0.237879581728048
62.1696738991886 1.11702132192658 0.243754036219437
62.1898975148797 1.17021281344689 0.249490210115391
62.2101211305708 1.01063833888595 0.231856336193246
62.2303447462618 0.851063864325011 0.212765966081253
62.2505683619529 0.744680881284384 0.199024337160503
62.270791977644 0.851063864325011 0.212765966081253
62.291015593335 1.27659579648752 0.260584025764691
62.3112392090261 0.957446847365637 0.225672386132641
62.3314628247172 0.691489389764071 0.191784650094897
62.3516864404082 0.797872372804697 0.206009760818106
62.3719100560993 0.957446847365637 0.225672386132641
62.3921336717904 1.32978728800783 0.265957457601566
62.4123572874814 1.27659579648752 0.260584025764691
62.4325809031725 1.06382983040626 0.237879581728048
62.4528045188636 1.27659579648752 0.260584025764691
62.4730281345546 0.851063864325011 0.212765966081253
62.4932517502457 1.06382983040626 0.237879581728048
62.5134753659368 1.2234043049672 0.255097431805139
62.5336989816278 1.38297877952814 0.271224453219182
62.5539225973189 1.43617027104846 0.276391097530654
62.57414621301 1.06382983040626 0.237879581728048
62.594369828701 1.01063833888595 0.231856336193246
62.6145934443921 1.27659579648752 0.260584025764691
62.6348170600832 1.17021281344689 0.249490210115391
62.6550406757742 0.851063864325011 0.212765966081253
62.6752642914653 1.59574474560939 0.291341797730203
62.6954879071563 0.797872372804697 0.206009760818106
62.7157115228474 1.32978728800783 0.265957457601566
62.7359351385385 1.06382983040626 0.237879581728048
62.7561587542295 1.38297877952814 0.271224453219182
62.7763823699206 0.904255355845324 0.219314137922397
62.7966059856117 1.06382983040626 0.237879581728048
62.8168296013027 0.904255355845324 0.219314137922397
62.8370532169938 1.06382983040626 0.237879581728048
62.8572768326849 1.48936176256877 0.281462916854699
62.8775004483759 1.48936176256877 0.281462916854699
62.897724064067 0.797872372804697 0.206009760818106
62.9179476797581 0.851063864325011 0.212765966081253
62.9381712954491 0.851063864325011 0.212765966081253
62.9583949111402 1.11702132192658 0.243754036219437
62.9786185268313 1.32978728800783 0.265957457601566
62.9988421425223 1.06382983040626 0.237879581728048
63.0190657582134 1.17021281344689 0.249490210115391
63.0392893739045 0.797872372804697 0.206009760818106
63.0595129895955 1.06382983040626 0.237879581728048
63.0797366052866 0.904255355845324 0.219314137922397
63.0999602209777 1.64893623712971 0.296157690892575
63.1201838366687 1.17021281344689 0.249490210115391
63.1404074523598 0.957446847365637 0.225672386132641
63.1606310680509 1.27659579648752 0.260584025764691
63.1808546837419 1.06382983040626 0.237879581728048
63.201078299433 0.904255355845324 0.219314137922397
63.2213019151241 1.27659579648752 0.260584025764691
63.2415255308151 1.32978728800783 0.265957457601566
63.2617491465062 0.851063864325011 0.212765966081253
63.2819727621973 1.17021281344689 0.249490210115391
63.3021963778883 1.59574474560939 0.291341797730203
63.3224199935794 1.38297877952814 0.271224453219182
63.3426436092705 1.11702132192658 0.243754036219437
63.3628672249615 1.2234043049672 0.255097431805139
63.3830908406526 1.27659579648752 0.260584025764691
63.4033144563437 1.27659579648752 0.260584025764691
63.4235380720347 0.797872372804697 0.206009760818106
63.4437616877258 1.11702132192658 0.243754036219437
63.4639853034168 1.32978728800783 0.265957457601566
63.4842089191079 1.59574474560939 0.291341797730203
63.504432534799 1.11702132192658 0.243754036219437
63.52465615049 1.32978728800783 0.265957457601566
63.5448797661811 0.904255355845324 0.219314137922397
63.5651033818722 1.11702132192658 0.243754036219437
63.5853269975632 1.01063833888595 0.231856336193246
63.6055506132543 1.17021281344689 0.249490210115391
63.6257742289454 0.904255355845324 0.219314137922397
63.6459978446364 1.59574474560939 0.291341797730203
63.6662214603275 1.17021281344689 0.249490210115391
63.6864450760186 1.17021281344689 0.249490210115391
63.7066686917096 1.06382983040626 0.237879581728048
63.7268923074007 1.38297877952814 0.271224453219182
63.7471159230918 1.2234043049672 0.255097431805139
63.7673395387828 1.86170220321096 0.314685107616239
63.7875631544739 0.638297898243758 0.184260731687103
63.807786770165 0.904255355845324 0.219314137922397
63.828010385856 0.797872372804697 0.206009760818106
63.8482340015471 1.11702132192658 0.243754036219437
63.8684576172382 1.17021281344689 0.249490210115391
63.8886812329292 1.48936176256877 0.281462916854699
63.9089048486203 1.75531922017033 0.305561855301235
63.9291284643114 0.851063864325011 0.212765966081253
63.9493520800024 0.904255355845324 0.219314137922397
63.9695756956935 1.2234043049672 0.255097431805139
63.9897993113846 1.01063833888595 0.231856336193246
64.0100229270756 0.851063864325011 0.212765966081253
64.0302465427667 1.06382983040626 0.237879581728048
64.0504701584578 1.06382983040626 0.237879581728048
64.0706937741488 1.54255325408908 0.286444948174184
64.0909173898399 1.27659579648752 0.260584025764691
64.111141005531 1.17021281344689 0.249490210115391
64.131364621222 1.17021281344689 0.249490210115391
64.1515882369131 0.744680881284384 0.199024337160503
64.1718118526042 1.38297877952814 0.271224453219182
64.1920354682952 1.59574474560939 0.291341797730203
64.2122590839863 1.01063833888595 0.231856336193246
64.2324826996773 1.75531922017033 0.305561855301235
64.2527063153684 1.17021281344689 0.249490210115391
64.2729299310595 1.11702132192658 0.243754036219437
64.2931535467505 1.01063833888595 0.231856336193246
64.3133771624416 1.01063833888595 0.231856336193246
64.3336007781327 1.01063833888595 0.231856336193246
64.3538243938237 1.43617027104846 0.276391097530654
64.3740480095148 1.32978728800783 0.265957457601566
64.3942716252059 0.851063864325011 0.212765966081253
64.4144952408969 0.904255355845324 0.219314137922397
64.434718856588 0.957446847365637 0.225672386132641
64.4549424722791 0.904255355845324 0.219314137922397
64.4751660879701 1.01063833888595 0.231856336193246
64.4953897036612 0.904255355845324 0.219314137922397
64.5156133193523 0.957446847365637 0.225672386132641
64.5358369350433 1.2234043049672 0.255097431805139
64.5560605507344 1.43617027104846 0.276391097530654
64.5762841664255 0.904255355845324 0.219314137922397
64.5965077821165 0.638297898243758 0.184260731687103
64.6167313978076 0.797872372804697 0.206009760818106
64.6369550134987 0.904255355845324 0.219314137922397
64.6571786291897 0.691489389764071 0.191784650094897
64.6774022448808 1.06382983040626 0.237879581728048
64.6976258605719 0.638297898243758 0.184260731687103
64.7178494762629 1.32978728800783 0.265957457601566
64.738073091954 0.904255355845324 0.219314137922397
64.7582967076451 1.06382983040626 0.237879581728048
64.7785203233361 0.691489389764071 0.191784650094897
64.7987439390272 0.744680881284384 0.199024337160503
64.8189675547183 1.64893623712971 0.296157690892575
64.8391911704093 0.797872372804697 0.206009760818106
64.8594147861004 0.851063864325011 0.212765966081253
64.8796384017915 0.744680881284384 0.199024337160503
64.8998620174825 0.638297898243758 0.184260731687103
64.9200856331736 1.01063833888595 0.231856336193246
64.9403092488647 1.01063833888595 0.231856336193246
64.9605328645557 1.38297877952814 0.271224453219182
64.9807564802468 1.01063833888595 0.231856336193246
65.0009800959378 1.06382983040626 0.237879581728048
65.0212037116289 0.904255355845324 0.219314137922397
65.04142732732 0.744680881284384 0.199024337160503
65.061650943011 0.797872372804697 0.206009760818106
65.0818745587021 1.11702132192658 0.243754036219437
65.1020981743932 0.904255355845324 0.219314137922397
65.1223217900842 0.851063864325011 0.212765966081253
65.1425454057753 1.17021281344689 0.249490210115391
65.1627690214664 0.904255355845324 0.219314137922397
65.1829926371574 1.11702132192658 0.243754036219437
65.2032162528485 1.11702132192658 0.243754036219437
65.2234398685396 1.64893623712971 0.296157690892575
65.2436634842306 1.27659579648752 0.260584025764691
65.2638870999217 1.27659579648752 0.260584025764691
65.2841107156128 0.904255355845324 0.219314137922397
65.3043343313038 1.11702132192658 0.243754036219437
65.3245579469949 0.957446847365637 0.225672386132641
65.344781562686 0.957446847365637 0.225672386132641
65.365005178377 1.2234043049672 0.255097431805139
65.3852287940681 1.32978728800783 0.265957457601566
65.4054524097592 0.957446847365637 0.225672386132641
65.4256760254502 1.27659579648752 0.260584025764691
65.4458996411413 1.38297877952814 0.271224453219182
65.4661232568324 1.11702132192658 0.243754036219437
65.4863468725234 0.797872372804697 0.206009760818106
65.5065704882145 1.01063833888595 0.231856336193246
65.5267941039056 1.54255325408908 0.286444948174184
65.5470177195966 1.2234043049672 0.255097431805139
65.5672413352877 0.744680881284384 0.199024337160503
65.5874649509788 0.638297898243758 0.184260731687103
65.6076885666698 1.01063833888595 0.231856336193246
65.6279121823609 1.01063833888595 0.231856336193246
65.648135798052 0.691489389764071 0.191784650094897
65.668359413743 1.06382983040626 0.237879581728048
65.6885830294341 1.06382983040626 0.237879581728048
65.7088066451252 0.531914915203132 0.168206265345722
65.7290302608162 0.744680881284384 0.199024337160503
65.7492538765073 1.01063833888595 0.231856336193246
65.7694774921983 0.691489389764071 0.191784650094897
65.7897011078894 0.585106406723445 0.17641621941225
65.8099247235805 0.638297898243758 0.184260731687103
65.8301483392715 0.425531932162505 0.150448257421761
65.8503719549626 1.11702132192658 0.243754036219437
65.8705955706537 1.01063833888595 0.231856336193246
65.8908191863447 0.904255355845324 0.219314137922397
65.9110428020358 0.797872372804697 0.206009760818106
65.9312664177269 0.585106406723445 0.17641621941225
65.9514900334179 0.904255355845324 0.219314137922397
65.971713649109 1.11702132192658 0.243754036219437
65.9919372648001 0.638297898243758 0.184260731687103
66.0121608804911 1.06382983040626 0.237879581728048
66.0323844961822 0.904255355845324 0.219314137922397
66.0526081118733 0.585106406723445 0.17641621941225
66.0728317275643 0.904255355845324 0.219314137922397
66.0930553432554 1.17021281344689 0.249490210115391
66.1132789589465 0.851063864325011 0.212765966081253
66.1335025746375 1.01063833888595 0.231856336193246
66.1537261903286 0.957446847365637 0.225672386132641
66.1739498060197 0.691489389764071 0.191784650094897
66.1941734217107 1.06382983040626 0.237879581728048
66.2143970374018 1.11702132192658 0.243754036219437
66.2346206530929 0.904255355845324 0.219314137922397
66.2548442687839 1.32978728800783 0.265957457601566
66.275067884475 0.904255355845324 0.219314137922397
66.2952915001661 0.904255355845324 0.219314137922397
66.3155151158571 0.691489389764071 0.191784650094897
66.3357387315482 0.851063864325011 0.212765966081253
66.3559623472393 1.17021281344689 0.249490210115391
66.3761859629303 1.01063833888595 0.231856336193246
66.3964095786214 1.06382983040626 0.237879581728048
66.4166331943125 1.17021281344689 0.249490210115391
66.4368568100035 1.06382983040626 0.237879581728048
66.4570804256946 1.01063833888595 0.231856336193246
66.4773040413857 1.11702132192658 0.243754036219437
66.4975276570767 1.01063833888595 0.231856336193246
66.5177512727678 0.904255355845324 0.219314137922397
66.5379748884588 1.11702132192658 0.243754036219437
66.5581985041499 0.957446847365637 0.225672386132641
66.578422119841 1.32978728800783 0.265957457601566
66.598645735532 1.06382983040626 0.237879581728048
66.6188693512231 0.904255355845324 0.219314137922397
66.6390929669142 1.01063833888595 0.231856336193246
66.6593165826052 0.744680881284384 0.199024337160503
66.6795401982963 0.904255355845324 0.219314137922397
66.6997638139874 1.11702132192658 0.243754036219437
66.7199874296784 1.01063833888595 0.231856336193246
66.7402110453695 0.957446847365637 0.225672386132641
66.7604346610606 1.11702132192658 0.243754036219437
66.7806582767516 1.01063833888595 0.231856336193246
66.8008818924427 0.904255355845324 0.219314137922397
66.8211055081338 0.797872372804697 0.206009760818106
66.8413291238248 0.904255355845324 0.219314137922397
66.8615527395159 1.59574474560939 0.291341797730203
66.881776355207 0.851063864325011 0.212765966081253
66.901999970898 0.797872372804697 0.206009760818106
66.9222235865891 0.744680881284384 0.199024337160503
66.9424472022802 0.797872372804697 0.206009760818106
66.9626708179712 1.2234043049672 0.255097431805139
66.9828944336623 0.531914915203132 0.168206265345722
67.0031180493534 0.585106406723445 0.17641621941225
67.0233416650444 1.17021281344689 0.249490210115391
67.0435652807355 0.638297898243758 0.184260731687103
67.0637888964266 0.638297898243758 0.184260731687103
67.0840125121176 1.64893623712971 0.296157690892575
67.1042361278087 1.43617027104846 0.276391097530654
67.1244597434998 1.32978728800783 0.265957457601566
67.1446833591908 1.01063833888595 0.231856336193246
67.1649069748819 0.585106406723445 0.17641621941225
67.185130590573 1.2234043049672 0.255097431805139
67.205354206264 0.957446847365637 0.225672386132641
67.2255778219551 0.904255355845324 0.219314137922397
67.2458014376462 0.957446847365637 0.225672386132641
67.2660250533372 0.797872372804697 0.206009760818106
67.2862486690283 0.851063864325011 0.212765966081253
67.3064722847193 0.957446847365637 0.225672386132641
67.3266959004104 0.957446847365637 0.225672386132641
67.3469195161015 1.11702132192658 0.243754036219437
67.3671431317925 0.744680881284384 0.199024337160503
67.3873667474836 1.11702132192658 0.243754036219437
67.4075903631747 1.11702132192658 0.243754036219437
67.4278139788657 1.11702132192658 0.243754036219437
67.4480375945568 1.11702132192658 0.243754036219437
67.4682612102479 0.531914915203132 0.168206265345722
67.4884848259389 0.797872372804697 0.206009760818106
67.50870844163 0.797872372804697 0.206009760818106
67.5289320573211 1.01063833888595 0.231856336193246
67.5491556730121 1.17021281344689 0.249490210115391
67.5693792887032 0.797872372804697 0.206009760818106
67.5896029043943 0.425531932162505 0.150448257421761
67.6098265200853 1.01063833888595 0.231856336193246
67.6300501357764 1.2234043049672 0.255097431805139
67.6502737514675 1.06382983040626 0.237879581728048
67.6704973671585 1.11702132192658 0.243754036219437
67.6907209828496 0.744680881284384 0.199024337160503
67.7109445985407 0.797872372804697 0.206009760818106
67.7311682142317 1.06382983040626 0.237879581728048
67.7513918299228 0.531914915203132 0.168206265345722
67.7716154456139 0.585106406723445 0.17641621941225
67.7918390613049 0.744680881284384 0.199024337160503
67.812062676996 0.904255355845324 0.219314137922397
67.8322862926871 0.638297898243758 0.184260731687103
67.8525099083781 1.2234043049672 0.255097431805139
67.8727335240692 1.06382983040626 0.237879581728048
67.8929571397603 1.17021281344689 0.249490210115391
67.9131807554513 0.797872372804697 0.206009760818106
67.9334043711424 0.638297898243758 0.184260731687103
67.9536279868335 1.06382983040626 0.237879581728048
67.9738516025245 0.904255355845324 0.219314137922397
67.9940752182156 0.851063864325011 0.212765966081253
68.0142988339067 0.904255355845324 0.219314137922397
68.0345224495977 1.11702132192658 0.243754036219437
68.0547460652888 0.691489389764071 0.191784650094897
68.0749696809798 1.01063833888595 0.231856336193246
68.0951932966709 0.904255355845324 0.219314137922397
68.115416912362 1.48936176256877 0.281462916854699
68.135640528053 0.691489389764071 0.191784650094897
68.1558641437441 0.691489389764071 0.191784650094897
68.1760877594352 0.851063864325011 0.212765966081253
68.1963113751262 0.531914915203132 0.168206265345722
68.2165349908173 1.01063833888595 0.231856336193246
68.2367586065084 1.17021281344689 0.249490210115391
68.2569822221994 1.17021281344689 0.249490210115391
68.2772058378905 1.01063833888595 0.231856336193246
68.2974294535816 0.851063864325011 0.212765966081253
68.3176530692726 0.585106406723445 0.17641621941225
68.3378766849637 0.851063864325011 0.212765966081253
68.3581003006548 0.851063864325011 0.212765966081253
68.3783239163458 0.904255355845324 0.219314137922397
68.3985475320369 0.638297898243758 0.184260731687103
68.418771147728 0.904255355845324 0.219314137922397
68.438994763419 1.01063833888595 0.231856336193246
68.4592183791101 1.27659579648752 0.260584025764691
68.4794419948012 1.17021281344689 0.249490210115391
68.4996656104922 0.957446847365637 0.225672386132641
68.5198892261833 0.957446847365637 0.225672386132641
68.5401128418744 0.904255355845324 0.219314137922397
68.5603364575654 0.425531932162505 0.150448257421761
68.5805600732565 0.957446847365637 0.225672386132641
68.6007836889476 1.27659579648752 0.260584025764691
68.6210073046386 1.06382983040626 0.237879581728048
68.6412309203297 0.904255355845324 0.219314137922397
68.6614545360208 1.01063833888595 0.231856336193246
68.6816781517118 1.01063833888595 0.231856336193246
68.7019017674029 1.27659579648752 0.260584025764691
68.722125383094 0.904255355845324 0.219314137922397
68.742348998785 1.11702132192658 0.243754036219437
68.7625726144761 0.957446847365637 0.225672386132641
68.7827962301672 1.17021281344689 0.249490210115391
68.8030198458582 0.319148949121879 0.130292012882345
68.8232434615493 0.797872372804697 0.206009760818106
68.8434670772403 1.06382983040626 0.237879581728048
68.8636906929314 0.904255355845324 0.219314137922397
68.8839143086225 0.851063864325011 0.212765966081253
68.9041379243135 1.06382983040626 0.237879581728048
68.9243615400046 0.797872372804697 0.206009760818106
68.9445851556957 1.27659579648752 0.260584025764691
68.9648087713867 0.957446847365637 0.225672386132641
68.9850323870778 1.2234043049672 0.255097431805139
69.0052560027689 0.797872372804697 0.206009760818106
69.0254796184599 0.957446847365637 0.225672386132641
69.045703234151 0.851063864325011 0.212765966081253
69.0659268498421 0.638297898243758 0.184260731687103
69.0861504655331 0.851063864325011 0.212765966081253
69.1063740812242 1.11702132192658 0.243754036219437
69.1265976969153 0.851063864325011 0.212765966081253
69.1468213126063 0.851063864325011 0.212765966081253
69.1670449282974 1.17021281344689 0.249490210115391
69.1872685439885 0.425531932162505 0.150448257421761
69.2074921596795 0.744680881284384 0.199024337160503
69.2277157753706 0.851063864325011 0.212765966081253
69.2479393910617 1.11702132192658 0.243754036219437
69.2681630067527 0.425531932162505 0.150448257421761
69.2883866224438 0.851063864325011 0.212765966081253
69.3086102381349 0.691489389764071 0.191784650094897
69.3288338538259 1.27659579648752 0.260584025764691
69.349057469517 0.744680881284384 0.199024337160503
69.3692810852081 1.11702132192658 0.243754036219437
69.3895047008991 0.851063864325011 0.212765966081253
69.4097283165902 1.17021281344689 0.249490210115391
69.4299519322813 1.17021281344689 0.249490210115391
69.4501755479723 0.797872372804697 0.206009760818106
69.4703991636634 0.851063864325011 0.212765966081253
69.4906227793545 0.797872372804697 0.206009760818106
69.5108463950455 0.957446847365637 0.225672386132641
69.5310700107366 0.691489389764071 0.191784650094897
69.5512936264277 1.01063833888595 0.231856336193246
69.5715172421187 0.638297898243758 0.184260731687103
69.5917408578098 1.11702132192658 0.243754036219437
69.6119644735008 0.744680881284384 0.199024337160503
69.6321880891919 0.638297898243758 0.184260731687103
69.652411704883 0.904255355845324 0.219314137922397
69.672635320574 1.11702132192658 0.243754036219437
69.6928589362651 0.957446847365637 0.225672386132641
69.7130825519562 0.957446847365637 0.225672386132641
69.7333061676472 0.691489389764071 0.191784650094897
69.7535297833383 0.797872372804697 0.206009760818106
69.7737533990294 0.797872372804697 0.206009760818106
69.7939770147204 0.904255355845324 0.219314137922397
69.8142006304115 0.585106406723445 0.17641621941225
69.8344242461026 0.691489389764071 0.191784650094897
69.8546478617936 0.904255355845324 0.219314137922397
69.8748714774847 0.585106406723445 0.17641621941225
69.8950950931758 0.797872372804697 0.206009760818106
69.9153187088668 1.01063833888595 0.231856336193246
69.9355423245579 0.638297898243758 0.184260731687103
69.955765940249 0.691489389764071 0.191784650094897
69.97598955594 1.17021281344689 0.249490210115391
69.9962131716311 1.06382983040626 0.237879581728048
70.0164367873222 0.851063864325011 0.212765966081253
70.0366604030132 0.797872372804697 0.206009760818106
70.0568840187043 0.531914915203132 0.168206265345722
70.0771076343954 1.32978728800783 0.265957457601566
70.0973312500864 0.851063864325011 0.212765966081253
70.1175548657775 0.691489389764071 0.191784650094897
70.1377784814686 0.957446847365637 0.225672386132641
70.1580020971596 1.01063833888595 0.231856336193246
70.1782257128507 0.691489389764071 0.191784650094897
70.1984493285418 0.904255355845324 0.219314137922397
70.2186729442328 0.744680881284384 0.199024337160503
70.2388965599239 0.585106406723445 0.17641621941225
70.259120175615 0.904255355845324 0.219314137922397
70.279343791306 0.585106406723445 0.17641621941225
70.2995674069971 0.797872372804697 0.206009760818106
70.3197910226882 1.11702132192658 0.243754036219437
70.3400146383792 0.797872372804697 0.206009760818106
70.3602382540703 0.585106406723445 0.17641621941225
70.3804618697613 0.691489389764071 0.191784650094897
70.4006854854524 1.38297877952814 0.271224453219182
70.4209091011435 0.425531932162505 0.150448257421761
70.4411327168345 0.585106406723445 0.17641621941225
70.4613563325256 0.957446847365637 0.225672386132641
70.4815799482167 0.585106406723445 0.17641621941225
70.5018035639077 0.638297898243758 0.184260731687103
70.5220271795988 0.638297898243758 0.184260731687103
70.5422507952899 0.585106406723445 0.17641621941225
70.5624744109809 0.904255355845324 0.219314137922397
70.582698026672 0.744680881284384 0.199024337160503
70.6029216423631 0.904255355845324 0.219314137922397
70.6231452580541 0.851063864325011 0.212765966081253
70.6433688737452 0.531914915203132 0.168206265345722
70.6635924894363 0.851063864325011 0.212765966081253
70.6838161051273 0.691489389764071 0.191784650094897
70.7040397208184 0.797872372804697 0.206009760818106
70.7242633365095 0.638297898243758 0.184260731687103
70.7444869522005 0.638297898243758 0.184260731687103
70.7647105678916 0.744680881284384 0.199024337160503
70.7849341835827 0.585106406723445 0.17641621941225
70.8051577992737 0.851063864325011 0.212765966081253
70.8253814149648 0.691489389764071 0.191784650094897
70.8456050306559 0.744680881284384 0.199024337160503
70.8658286463469 1.01063833888595 0.231856336193246
70.886052262038 0.744680881284384 0.199024337160503
70.9062758777291 0.638297898243758 0.184260731687103
70.9264994934201 0.957446847365637 0.225672386132641
70.9467231091112 0.638297898243758 0.184260731687103
70.9669467248023 0.691489389764071 0.191784650094897
70.9871703404933 0.585106406723445 0.17641621941225
71.0073939561844 0.744680881284384 0.199024337160503
71.0276175718755 1.32978728800783 0.265957457601566
71.0478411875665 0.797872372804697 0.206009760818106
71.0680648032576 0.957446847365637 0.225672386132641
71.0882884189487 0.797872372804697 0.206009760818106
71.1085120346397 0.851063864325011 0.212765966081253
71.1287356503308 0.957446847365637 0.225672386132641
71.1489592660218 0.638297898243758 0.184260731687103
71.1691828817129 0.957446847365637 0.225672386132641
71.189406497404 1.17021281344689 0.249490210115391
71.209630113095 1.17021281344689 0.249490210115391
71.2298537287861 0.904255355845324 0.219314137922397
71.2500773444772 1.01063833888595 0.231856336193246
71.2703009601682 1.01063833888595 0.231856336193246
71.2905245758593 0.744680881284384 0.199024337160503
71.3107481915504 1.11702132192658 0.243754036219437
71.3309718072414 0.797872372804697 0.206009760818106
71.3511954229325 0.957446847365637 0.225672386132641
71.3714190386236 0.744680881284384 0.199024337160503
71.3916426543146 0.585106406723445 0.17641621941225
71.4118662700057 0.797872372804697 0.206009760818106
71.4320898856968 0.744680881284384 0.199024337160503
71.4523135013878 1.01063833888595 0.231856336193246
71.4725371170789 1.06382983040626 0.237879581728048
71.49276073277 0.638297898243758 0.184260731687103
71.512984348461 0.638297898243758 0.184260731687103
71.5332079641521 1.2234043049672 0.255097431805139
71.5534315798432 0.797872372804697 0.206009760818106
71.5736551955342 0.744680881284384 0.199024337160503
71.5938788112253 1.06382983040626 0.237879581728048
71.6141024269164 1.2234043049672 0.255097431805139
71.6343260426074 0.691489389764071 0.191784650094897
71.6545496582985 0.744680881284384 0.199024337160503
71.6747732739896 1.11702132192658 0.243754036219437
71.6949968896806 0.957446847365637 0.225672386132641
71.7152205053717 0.851063864325011 0.212765966081253
71.7354441210628 0.691489389764071 0.191784650094897
71.7556677367538 0.797872372804697 0.206009760818106
71.7758913524449 0.797872372804697 0.206009760818106
71.796114968136 0.691489389764071 0.191784650094897
71.816338583827 0.691489389764071 0.191784650094897
71.8365621995181 0.478723423682818 0.159574474560939
71.8567858152092 0.797872372804697 0.206009760818106
71.8770094309002 0.531914915203132 0.168206265345722
71.8972330465913 1.17021281344689 0.249490210115391
71.9174566622823 0.691489389764071 0.191784650094897
71.9376802779734 0.851063864325011 0.212765966081253
71.9579038936645 0.744680881284384 0.199024337160503
71.9781275093555 0.478723423682818 0.159574474560939
71.9983511250466 0.744680881284384 0.199024337160503
72.0185747407377 0.797872372804697 0.206009760818106
72.0387983564287 0.425531932162505 0.150448257421761
72.0590219721198 0.638297898243758 0.184260731687103
72.0792455878109 0.691489389764071 0.191784650094897
72.0994692035019 1.38297877952814 0.271224453219182
72.119692819193 0.904255355845324 0.219314137922397
72.1399164348841 0.797872372804697 0.206009760818106
72.1601400505751 1.01063833888595 0.231856336193246
72.1803636662662 1.01063833888595 0.231856336193246
72.2005872819573 0.744680881284384 0.199024337160503
72.2208108976483 0.957446847365637 0.225672386132641
72.2410345133394 1.01063833888595 0.231856336193246
72.2612581290305 1.32978728800783 0.265957457601566
72.2814817447215 0.638297898243758 0.184260731687103
72.3017053604126 0.797872372804697 0.206009760818106
72.3219289761037 0.585106406723445 0.17641621941225
72.3421525917947 0.904255355845324 0.219314137922397
72.3623762074858 0.531914915203132 0.168206265345722
72.3825998231769 0.904255355845324 0.219314137922397
72.4028234388679 0.744680881284384 0.199024337160503
72.423047054559 0.851063864325011 0.212765966081253
72.4432706702501 0.797872372804697 0.206009760818106
72.4634942859411 0.744680881284384 0.199024337160503
72.4837179016322 0.585106406723445 0.17641621941225
72.5039415173233 0.372340440642192 0.14073145842735
72.5241651330143 0.531914915203132 0.168206265345722
72.5443887487054 0.851063864325011 0.212765966081253
72.5646123643965 0.744680881284384 0.199024337160503
72.5848359800875 0.904255355845324 0.219314137922397
72.6050595957786 0.904255355845324 0.219314137922397
72.6252832114697 1.01063833888595 0.231856336193246
72.6455068271607 0.531914915203132 0.168206265345722
72.6657304428518 0.797872372804697 0.206009760818106
72.6859540585428 0.957446847365637 0.225672386132641
72.7061776742339 0.851063864325011 0.212765966081253
72.726401289925 0.319148949121879 0.130292012882345
72.746624905616 0.638297898243758 0.184260731687103
72.7668485213071 0.904255355845324 0.219314137922397
72.7870721369982 0.904255355845324 0.219314137922397
72.8072957526892 0.797872372804697 0.206009760818106
72.8275193683803 0.638297898243758 0.184260731687103
72.8477429840714 0.425531932162505 0.150448257421761
72.8679665997624 1.01063833888595 0.231856336193246
72.8881902154535 1.01063833888595 0.231856336193246
72.9084138311446 0.744680881284384 0.199024337160503
72.9286374468356 0.478723423682818 0.159574474560939
72.9488610625267 0.638297898243758 0.184260731687103
72.9690846782178 0.691489389764071 0.191784650094897
72.9893082939088 0.372340440642192 0.14073145842735
73.0095319095999 0.904255355845324 0.219314137922397
73.029755525291 0.531914915203132 0.168206265345722
73.049979140982 0.585106406723445 0.17641621941225
73.0702027566731 0.797872372804697 0.206009760818106
73.0904263723642 0.744680881284384 0.199024337160503
73.1106499880552 1.06382983040626 0.237879581728048
73.1308736037463 0.638297898243758 0.184260731687103
73.1510972194374 0.851063864325011 0.212765966081253
73.1713208351284 0.957446847365637 0.225672386132641
73.1915444508195 0.372340440642192 0.14073145842735
73.2117680665106 1.01063833888595 0.231856336193246
73.2319916822016 0.691489389764071 0.191784650094897
73.2522152978927 0.638297898243758 0.184260731687103
73.2724389135838 0.797872372804697 0.206009760818106
73.2926625292748 0.797872372804697 0.206009760818106
73.3128861449659 1.01063833888595 0.231856336193246
73.333109760657 0.691489389764071 0.191784650094897
73.353333376348 0.904255355845324 0.219314137922397
73.3735569920391 1.01063833888595 0.231856336193246
73.3937806077302 1.01063833888595 0.231856336193246
73.4140042234212 0.797872372804697 0.206009760818106
73.4342278391123 0.691489389764071 0.191784650094897
73.4544514548033 0.638297898243758 0.184260731687103
73.4746750704944 0.531914915203132 0.168206265345722
73.4948986861855 0.851063864325011 0.212765966081253
73.5151223018765 0.797872372804697 0.206009760818106
73.5353459175676 0.797872372804697 0.206009760818106
73.5555695332587 0.372340440642192 0.14073145842735
73.5757931489497 0.638297898243758 0.184260731687103
73.5960167646408 0.638297898243758 0.184260731687103
73.6162403803319 0.797872372804697 0.206009760818106
73.6364639960229 0.265957457601566 0.118939790864024
73.656687611714 0.957446847365637 0.225672386132641
73.6769112274051 0.478723423682818 0.159574474560939
73.6971348430961 0.691489389764071 0.191784650094897
73.7173584587872 0.957446847365637 0.225672386132641
73.7375820744783 0.744680881284384 0.199024337160503
73.7578056901693 0.797872372804697 0.206009760818106
73.7780293058604 0.638297898243758 0.184260731687103
73.7982529215515 0.691489389764071 0.191784650094897
73.8184765372425 0.744680881284384 0.199024337160503
73.8387001529336 0.531914915203132 0.168206265345722
73.8589237686247 0.531914915203132 0.168206265345722
73.8791473843157 0.744680881284384 0.199024337160503
73.8993710000068 0.851063864325011 0.212765966081253
73.9195946156979 0.744680881284384 0.199024337160503
73.9398182313889 0.638297898243758 0.184260731687103
73.96004184708 0.851063864325011 0.212765966081253
73.9802654627711 0.212765966081253 0.106382983040626
74.0004890784621 0.425531932162505 0.150448257421761
74.0207126941532 0.744680881284384 0.199024337160503
74.0409363098443 0.691489389764071 0.191784650094897
74.0611599255353 0.851063864325011 0.212765966081253
74.0813835412264 0.744680881284384 0.199024337160503
74.1016071569175 0.851063864325011 0.212765966081253
74.1218307726085 0.691489389764071 0.191784650094897
74.1420543882996 0.691489389764071 0.191784650094897
74.1622780039907 0.585106406723445 0.17641621941225
74.1825016196817 0.744680881284384 0.199024337160503
74.2027252353728 0.585106406723445 0.17641621941225
74.2229488510638 0.691489389764071 0.191784650094897
74.2431724667549 0.691489389764071 0.191784650094897
74.263396082446 0.744680881284384 0.199024337160503
74.283619698137 0.638297898243758 0.184260731687103
74.3038433138281 0.744680881284384 0.199024337160503
74.3240669295192 0.372340440642192 0.14073145842735
74.3442905452102 0.691489389764071 0.191784650094897
74.3645141609013 0.638297898243758 0.184260731687103
74.3847377765924 1.01063833888595 0.231856336193246
74.4049613922834 0.585106406723445 0.17641621941225
74.4251850079745 0.531914915203132 0.168206265345722
74.4454086236656 0.744680881284384 0.199024337160503
74.4656322393566 0.691489389764071 0.191784650094897
74.4858558550477 0.851063864325011 0.212765966081253
74.5060794707388 0.797872372804697 0.206009760818106
74.5263030864298 0.531914915203132 0.168206265345722
74.5465267021209 0.531914915203132 0.168206265345722
74.566750317812 0.585106406723445 0.17641621941225
74.586973933503 0.691489389764071 0.191784650094897
74.6071975491941 0.851063864325011 0.212765966081253
74.6274211648852 0.531914915203132 0.168206265345722
74.6476447805762 0.957446847365637 0.225672386132641
74.6678683962673 0.638297898243758 0.184260731687103
74.6880920119584 0.851063864325011 0.212765966081253
74.7083156276494 0.531914915203132 0.168206265345722
74.7285392433405 0.691489389764071 0.191784650094897
74.7487628590316 0.531914915203132 0.168206265345722
74.7689864747226 1.11702132192658 0.243754036219437
74.7892100904137 1.01063833888595 0.231856336193246
74.8094337061048 0.425531932162505 0.150448257421761
74.8296573217958 0.585106406723445 0.17641621941225
74.8498809374869 0.531914915203132 0.168206265345722
74.870104553178 0.691489389764071 0.191784650094897
74.890328168869 0.478723423682818 0.159574474560939
74.9105517845601 0.478723423682818 0.159574474560939
74.9307754002512 0.531914915203132 0.168206265345722
74.9509990159422 0.531914915203132 0.168206265345722
74.9712226316333 0.372340440642192 0.14073145842735
74.9914462473243 0.744680881284384 0.199024337160503
75.0116698630154 0.851063864325011 0.212765966081253
75.0318934787065 1.01063833888595 0.231856336193246
75.0521170943975 0.797872372804697 0.206009760818106
75.0723407100886 0.904255355845324 0.219314137922397
75.0925643257797 0.691489389764071 0.191784650094897
75.1127879414707 0.531914915203132 0.168206265345722
75.1330115571618 0.851063864325011 0.212765966081253
75.1532351728529 0.638297898243758 0.184260731687103
75.1734587885439 0.744680881284384 0.199024337160503
75.193682404235 0.744680881284384 0.199024337160503
75.2139060199261 0.691489389764071 0.191784650094897
75.2341296356171 0.744680881284384 0.199024337160503
75.2543532513082 0.531914915203132 0.168206265345722
75.2745768669993 0.904255355845324 0.219314137922397
75.2948004826903 0.744680881284384 0.199024337160503
75.3150240983814 0.851063864325011 0.212765966081253
75.3352477140725 1.27659579648752 0.260584025764691
75.3554713297635 0.372340440642192 0.14073145842735
75.3756949454546 0.744680881284384 0.199024337160503
75.3959185611457 1.06382983040626 0.237879581728048
75.4161421768367 0.744680881284384 0.199024337160503
75.4363657925278 0.638297898243758 0.184260731687103
75.4565894082189 0.531914915203132 0.168206265345722
75.4768130239099 0.797872372804697 0.206009760818106
75.497036639601 0.957446847365637 0.225672386132641
75.5172602552921 0.638297898243758 0.184260731687103
75.5374838709831 0.638297898243758 0.184260731687103
75.5577074866742 0.797872372804697 0.206009760818106
75.5779311023653 0.797872372804697 0.206009760818106
75.5981547180563 0.638297898243758 0.184260731687103
75.6183783337474 1.06382983040626 0.237879581728048
75.6386019494385 0.904255355845324 0.219314137922397
75.6588255651295 0.691489389764071 0.191784650094897
75.6790491808206 0.851063864325011 0.212765966081253
75.6992727965117 0.585106406723445 0.17641621941225
75.7194964122027 0.957446847365637 0.225672386132641
75.7397200278938 1.11702132192658 0.243754036219437
75.7599436435848 0.638297898243758 0.184260731687103
75.7801672592759 0.904255355845324 0.219314137922397
75.800390874967 0.744680881284384 0.199024337160503
75.820614490658 0.691489389764071 0.191784650094897
75.8408381063491 0.638297898243758 0.184260731687103
75.8610617220402 0.372340440642192 0.14073145842735
75.8812853377312 0.744680881284384 0.199024337160503
75.9015089534223 0.585106406723445 0.17641621941225
75.9217325691134 0.851063864325011 0.212765966081253
75.9419561848044 0.638297898243758 0.184260731687103
75.9621798004955 0.585106406723445 0.17641621941225
75.9824034161866 0.531914915203132 0.168206265345722
76.0026270318776 0.319148949121879 0.130292012882345
76.0228506475687 0.531914915203132 0.168206265345722
76.0430742632598 0.585106406723445 0.17641621941225
76.0632978789508 0.531914915203132 0.168206265345722
76.0835214946419 0.265957457601566 0.118939790864024
76.103745110333 0.638297898243758 0.184260731687103
76.123968726024 0.425531932162505 0.150448257421761
76.1441923417151 0.638297898243758 0.184260731687103
76.1644159574062 0.851063864325011 0.212765966081253
76.1846395730972 0.478723423682818 0.159574474560939
76.2048631887883 0.585106406723445 0.17641621941225
76.2250868044794 0.585106406723445 0.17641621941225
76.2453104201704 0.904255355845324 0.219314137922397
76.2655340358615 0.478723423682818 0.159574474560939
76.2857576515526 0.585106406723445 0.17641621941225
76.3059812672436 0.797872372804697 0.206009760818106
76.3262048829347 0.638297898243758 0.184260731687103
76.3464284986258 0.478723423682818 0.159574474560939
76.3666521143168 0.904255355845324 0.219314137922397
76.3868757300079 0.797872372804697 0.206009760818106
76.407099345699 0.372340440642192 0.14073145842735
76.42732296139 0.478723423682818 0.159574474560939
76.4475465770811 0.531914915203132 0.168206265345722
76.4677701927722 0.744680881284384 0.199024337160503
76.4879938084632 0.585106406723445 0.17641621941225
76.5082174241543 0.691489389764071 0.191784650094897
76.5284410398453 0.585106406723445 0.17641621941225
76.5486646555364 0.797872372804697 0.206009760818106
76.5688882712275 0.691489389764071 0.191784650094897
76.5891118869185 0.797872372804697 0.206009760818106
76.6093355026096 0.478723423682818 0.159574474560939
76.6295591183007 0.372340440642192 0.14073145842735
76.6497827339917 0.478723423682818 0.159574474560939
76.6700063496828 0.638297898243758 0.184260731687103
76.6902299653739 0.425531932162505 0.150448257421761
76.7104535810649 0.797872372804697 0.206009760818106
76.730677196756 0.638297898243758 0.184260731687103
76.7509008124471 0.744680881284384 0.199024337160503
76.7711244281381 0.797872372804697 0.206009760818106
76.7913480438292 0.797872372804697 0.206009760818106
76.8115716595203 0.531914915203132 0.168206265345722
76.8317952752113 0.744680881284384 0.199024337160503
76.8520188909024 0.585106406723445 0.17641621941225
76.8722425065935 0.851063864325011 0.212765966081253
76.8924661222845 0.797872372804697 0.206009760818106
76.9126897379756 0.531914915203132 0.168206265345722
76.9329133536667 0.425531932162505 0.150448257421761
76.9531369693577 0.691489389764071 0.191784650094897
76.9733605850488 0.851063864325011 0.212765966081253
76.9935842007399 0.797872372804697 0.206009760818106
77.0138078164309 0.797872372804697 0.206009760818106
77.034031432122 0.744680881284384 0.199024337160503
77.0542550478131 0.797872372804697 0.206009760818106
77.0744786635041 0.691489389764071 0.191784650094897
77.0947022791952 0.797872372804697 0.206009760818106
77.1149258948863 0.372340440642192 0.14073145842735
77.1351495105773 0.478723423682818 0.159574474560939
77.1553731262684 1.01063833888595 0.231856336193246
77.1755967419595 0.585106406723445 0.17641621941225
77.1958203576505 0.319148949121879 0.130292012882345
77.2160439733416 0.691489389764071 0.191784650094897
77.2362675890327 0.425531932162505 0.150448257421761
77.2564912047237 0.691489389764071 0.191784650094897
77.2767148204148 0.531914915203132 0.168206265345722
77.2969384361058 0.585106406723445 0.17641621941225
77.3171620517969 0.478723423682818 0.159574474560939
77.337385667488 0.585106406723445 0.17641621941225
77.357609283179 0.531914915203132 0.168206265345722
77.3778328988701 0.425531932162505 0.150448257421761
77.3980565145612 0.797872372804697 0.206009760818106
77.4182801302522 1.01063833888595 0.231856336193246
77.4385037459433 0.744680881284384 0.199024337160503
77.4587273616344 0.585106406723445 0.17641621941225
77.4789509773254 0.797872372804697 0.206009760818106
77.4991745930165 0.691489389764071 0.191784650094897
77.5193982087076 0.638297898243758 0.184260731687103
77.5396218243986 0.638297898243758 0.184260731687103
77.5598454400897 0.372340440642192 0.14073145842735
77.5800690557808 0.904255355845324 0.219314137922397
77.6002926714718 0.425531932162505 0.150448257421761
77.6205162871629 0.851063864325011 0.212765966081253
77.640739902854 0.638297898243758 0.184260731687103
77.660963518545 0.531914915203132 0.168206265345722
77.6811871342361 0.478723423682818 0.159574474560939
77.7014107499272 0.638297898243758 0.184260731687103
77.7216343656182 0.265957457601566 0.118939790864024
77.7418579813093 0.585106406723445 0.17641621941225
77.7620815970004 0.851063864325011 0.212765966081253
77.7823052126914 0.531914915203132 0.168206265345722
77.8025288283825 0.425531932162505 0.150448257421761
77.8227524440736 0.478723423682818 0.159574474560939
77.8429760597646 0.585106406723445 0.17641621941225
77.8631996754557 0.372340440642192 0.14073145842735
77.8834232911468 0.638297898243758 0.184260731687103
77.9036469068378 0.744680881284384 0.199024337160503
77.9238705225289 0.585106406723445 0.17641621941225
77.94409413822 0.797872372804697 0.206009760818106
77.964317753911 0.638297898243758 0.184260731687103
77.9845413696021 0.478723423682818 0.159574474560939
78.0047649852932 0.212765966081253 0.106382983040626
78.0249886009842 0.425531932162505 0.150448257421761
78.0452122166753 0.531914915203132 0.168206265345722
78.0654358323663 0.691489389764071 0.191784650094897
78.0856594480574 0.797872372804697 0.206009760818106
78.1058830637485 0.478723423682818 0.159574474560939
78.1261066794395 0.425531932162505 0.150448257421761
78.1463302951306 0.851063864325011 0.212765966081253
78.1665539108217 0.691489389764071 0.191784650094897
78.1867775265127 0.531914915203132 0.168206265345722
78.2070011422038 0.478723423682818 0.159574474560939
78.2272247578949 0.319148949121879 0.130292012882345
78.2474483735859 0.478723423682818 0.159574474560939
78.267671989277 0.744680881284384 0.199024337160503
78.2878956049681 0.531914915203132 0.168206265345722
78.3081192206591 0.265957457601566 0.118939790864024
78.3283428363502 0.638297898243758 0.184260731687103
78.3485664520413 0.957446847365637 0.225672386132641
78.3687900677323 0.425531932162505 0.150448257421761
78.3890136834234 0.585106406723445 0.17641621941225
78.4092372991145 0.744680881284384 0.199024337160503
78.4294609148055 0.531914915203132 0.168206265345722
78.4496845304966 0.638297898243758 0.184260731687103
78.4699081461877 0.425531932162505 0.150448257421761
78.4901317618787 0.585106406723445 0.17641621941225
78.5103553775698 0.585106406723445 0.17641621941225
78.5305789932609 0.478723423682818 0.159574474560939
78.5508026089519 0.851063864325011 0.212765966081253
78.571026224643 0.212765966081253 0.106382983040626
78.5912498403341 0.638297898243758 0.184260731687103
78.6114734560251 0.585106406723445 0.17641621941225
78.6316970717162 0.691489389764071 0.191784650094897
78.6519206874073 0.585106406723445 0.17641621941225
78.6721443030983 0.691489389764071 0.191784650094897
78.6923679187894 0.265957457601566 0.118939790864024
78.7125915344805 0.638297898243758 0.184260731687103
78.7328151501715 0.478723423682818 0.159574474560939
78.7530387658626 0.372340440642192 0.14073145842735
78.7732623815537 0.638297898243758 0.184260731687103
78.7934859972447 0.478723423682818 0.159574474560939
78.8137096129358 0.797872372804697 0.206009760818106
78.8339332286268 0.638297898243758 0.184260731687103
78.8541568443179 0.478723423682818 0.159574474560939
78.874380460009 0.585106406723445 0.17641621941225
78.8946040757 0.531914915203132 0.168206265345722
78.9148276913911 0.957446847365637 0.225672386132641
78.9350513070822 0.478723423682818 0.159574474560939
78.9552749227732 0.372340440642192 0.14073145842735
78.9754985384643 0.691489389764071 0.191784650094897
78.9957221541554 0.372340440642192 0.14073145842735
79.0159457698464 0.531914915203132 0.168206265345722
79.0361693855375 0.531914915203132 0.168206265345722
79.0563930012286 0.372340440642192 0.14073145842735
79.0766166169196 0.425531932162505 0.150448257421761
79.0968402326107 0.531914915203132 0.168206265345722
79.1170638483018 0.638297898243758 0.184260731687103
79.1372874639928 0.319148949121879 0.130292012882345
79.1575110796839 0.797872372804697 0.206009760818106
79.177734695375 0.957446847365637 0.225672386132641
79.197958311066 0.531914915203132 0.168206265345722
79.2181819267571 0.531914915203132 0.168206265345722
79.2384055424482 0.797872372804697 0.206009760818106
79.2586291581392 0.691489389764071 0.191784650094897
79.2788527738303 0.265957457601566 0.118939790864024
79.2990763895214 0.531914915203132 0.168206265345722
79.3193000052124 0.744680881284384 0.199024337160503
79.3395236209035 0.478723423682818 0.159574474560939
79.3597472365946 0.265957457601566 0.118939790864024
79.3799708522856 0.638297898243758 0.184260731687103
79.4001944679767 0.585106406723445 0.17641621941225
79.4204180836678 0.851063864325011 0.212765966081253
79.4406416993588 0.691489389764071 0.191784650094897
79.4608653150499 0.478723423682818 0.159574474560939
79.481088930741 0.531914915203132 0.168206265345722
79.501312546432 0.372340440642192 0.14073145842735
79.5215361621231 0.531914915203132 0.168206265345722
79.5417597778142 0.531914915203132 0.168206265345722
79.5619833935052 0.372340440642192 0.14073145842735
79.5822070091963 0.638297898243758 0.184260731687103
79.6024306248873 0.265957457601566 0.118939790864024
79.6226542405784 0.904255355845324 0.219314137922397
79.6428778562695 0.691489389764071 0.191784650094897
79.6631014719605 0.319148949121879 0.130292012882345
79.6833250876516 0.478723423682818 0.159574474560939
79.7035487033427 0.957446847365637 0.225672386132641
79.7237723190337 0.638297898243758 0.184260731687103
79.7439959347248 0.478723423682818 0.159574474560939
79.7642195504159 0.265957457601566 0.118939790864024
79.7844431661069 0.531914915203132 0.168206265345722
79.804666781798 0.425531932162505 0.150448257421761
79.8248903974891 0.585106406723445 0.17641621941225
79.8451140131801 0.478723423682818 0.159574474560939
79.8653376288712 0.531914915203132 0.168206265345722
79.8855612445623 0.531914915203132 0.168206265345722
79.9057848602533 0.212765966081253 0.106382983040626
79.9260084759444 0.478723423682818 0.159574474560939
79.9462320916355 0.585106406723445 0.17641621941225
79.9664557073265 0.478723423682818 0.159574474560939
79.9866793230176 0.265957457601566 0.118939790864024
80.0069029387087 0.265957457601566 0.118939790864024
80.0271265543997 0.691489389764071 0.191784650094897
80.0473501700908 0.531914915203132 0.168206265345722
80.0675737857819 0.531914915203132 0.168206265345722
80.0877974014729 0.372340440642192 0.14073145842735
80.108021017164 0.478723423682818 0.159574474560939
80.1282446328551 0.478723423682818 0.159574474560939
80.1484682485461 0.744680881284384 0.199024337160503
80.1686918642372 0.691489389764071 0.191784650094897
80.1889154799283 0.425531932162505 0.150448257421761
80.2091390956193 0.744680881284384 0.199024337160503
80.2293627113104 0.531914915203132 0.168206265345722
80.2495863270015 0.425531932162505 0.150448257421761
80.2698099426925 0.585106406723445 0.17641621941225
80.2900335583836 0.797872372804697 0.206009760818106
80.3102571740747 0.478723423682818 0.159574474560939
80.3304807897657 0.372340440642192 0.14073145842735
80.3507044054568 0.638297898243758 0.184260731687103
80.3709280211478 0.425531932162505 0.150448257421761
80.3911516368389 0.212765966081253 0.106382983040626
80.41137525253 0.425531932162505 0.150448257421761
80.431598868221 0.478723423682818 0.159574474560939
80.4518224839121 0.425531932162505 0.150448257421761
80.4720460996032 0.904255355845324 0.219314137922397
80.4922697152942 0.691489389764071 0.191784650094897
80.5124933309853 0.372340440642192 0.14073145842735
80.5327169466764 0.212765966081253 0.106382983040626
80.5529405623674 0.319148949121879 0.130292012882345
80.5731641780585 0.691489389764071 0.191784650094897
80.5933877937496 0.478723423682818 0.159574474560939
80.6136114094406 0.265957457601566 0.118939790864024
80.6338350251317 0.638297898243758 0.184260731687103
80.6540586408228 0.531914915203132 0.168206265345722
80.6742822565138 0.212765966081253 0.106382983040626
80.6945058722049 0.425531932162505 0.150448257421761
80.714729487896 0.319148949121879 0.130292012882345
80.734953103587 0.585106406723445 0.17641621941225
80.7551767192781 0.478723423682818 0.159574474560939
80.7754003349692 0.425531932162505 0.150448257421761
80.7956239506602 0.319148949121879 0.130292012882345
80.8158475663513 0.425531932162505 0.150448257421761
80.8360711820424 0.478723423682818 0.159574474560939
80.8562947977334 0.531914915203132 0.168206265345722
80.8765184134245 0.425531932162505 0.150448257421761
80.8967420291156 0.585106406723445 0.17641621941225
80.9169656448066 0.159574474560939 0.0921303658435515
80.9371892604977 0.319148949121879 0.130292012882345
80.9574128761888 0.319148949121879 0.130292012882345
80.9776364918798 0.638297898243758 0.184260731687103
80.9978601075709 0.319148949121879 0.130292012882345
81.018083723262 0.425531932162505 0.150448257421761
81.038307338953 0.319148949121879 0.130292012882345
81.0585309546441 0.319148949121879 0.130292012882345
81.0787545703352 0.585106406723445 0.17641621941225
81.0989781860262 0.319148949121879 0.130292012882345
81.1192018017173 0.797872372804697 0.206009760818106
81.1394254174083 0.638297898243758 0.184260731687103
81.1596490330994 0.531914915203132 0.168206265345722
81.1798726487905 0.372340440642192 0.14073145842735
81.2000962644815 0.585106406723445 0.17641621941225
81.2203198801726 0.106382983040626 0.0752241287108804
81.2405434958637 0.531914915203132 0.168206265345722
81.2607671115547 0.372340440642192 0.14073145842735
81.2809907272458 0.478723423682818 0.159574474560939
81.3012143429369 0.319148949121879 0.130292012882345
81.3214379586279 0.638297898243758 0.184260731687103
81.341661574319 0.265957457601566 0.118939790864024
81.3618851900101 0.531914915203132 0.168206265345722
81.3821088057011 0.531914915203132 0.168206265345722
81.4023324213922 0.425531932162505 0.150448257421761
81.4225560370833 0.797872372804697 0.206009760818106
81.4427796527743 0.425531932162505 0.150448257421761
81.4630032684654 0.372340440642192 0.14073145842735
81.4832268841565 0.585106406723445 0.17641621941225
81.5034504998475 0.638297898243758 0.184260731687103
81.5236741155386 0.638297898243758 0.184260731687103
81.5438977312297 0.372340440642192 0.14073145842735
81.5641213469207 0.425531932162505 0.150448257421761
81.5843449626118 0.531914915203132 0.168206265345722
81.6045685783029 0.531914915203132 0.168206265345722
81.6247921939939 0.478723423682818 0.159574474560939
81.645015809685 0.744680881284384 0.199024337160503
81.6652394253761 0.531914915203132 0.168206265345722
81.6854630410671 0.425531932162505 0.150448257421761
81.7056866567582 0.691489389764071 0.191784650094897
81.7259102724493 0.319148949121879 0.130292012882345
81.7461338881403 0.638297898243758 0.184260731687103
81.7663575038314 0.478723423682818 0.159574474560939
81.7865811195225 0.478723423682818 0.159574474560939
81.8068047352135 0.478723423682818 0.159574474560939
81.8270283509046 0.797872372804697 0.206009760818106
81.8472519665957 0.851063864325011 0.212765966081253
81.8674755822867 0.585106406723445 0.17641621941225
81.8876991979778 0.638297898243758 0.184260731687103
81.9079228136688 0.531914915203132 0.168206265345722
81.9281464293599 0.425531932162505 0.150448257421761
81.948370045051 0.585106406723445 0.17641621941225
81.968593660742 0.478723423682818 0.159574474560939
81.9888172764331 0.638297898243758 0.184260731687103
82.0090408921242 0.159574474560939 0.0921303658435515
82.0292645078152 0.319148949121879 0.130292012882345
82.0494881235063 0.319148949121879 0.130292012882345
82.0697117391974 0.744680881284384 0.199024337160503
82.0899353548884 0.372340440642192 0.14073145842735
82.1101589705795 0.425531932162505 0.150448257421761
82.1303825862706 0.425531932162505 0.150448257421761
82.1506062019616 0.585106406723445 0.17641621941225
82.1708298176527 0.106382983040626 0.0752241287108804
82.1910534333438 0.478723423682818 0.159574474560939
82.2112770490348 0.319148949121879 0.130292012882345
82.2315006647259 0.585106406723445 0.17641621941225
82.251724280417 0.372340440642192 0.14073145842735
82.271947896108 0.638297898243758 0.184260731687103
82.2921715117991 0.478723423682818 0.159574474560939
82.3123951274902 0.106382983040626 0.0752241287108804
82.3326187431812 0.691489389764071 0.191784650094897
82.3528423588723 0.478723423682818 0.159574474560939
82.3730659745634 0.425531932162505 0.150448257421761
82.3932895902544 0.585106406723445 0.17641621941225
82.4135132059455 0.372340440642192 0.14073145842735
82.4337368216366 0.691489389764071 0.191784650094897
82.4539604373276 0.851063864325011 0.212765966081253
82.4741840530187 0.638297898243758 0.184260731687103
82.4944076687098 0.478723423682818 0.159574474560939
82.5146312844008 0.265957457601566 0.118939790864024
82.5348549000919 0.851063864325011 0.212765966081253
82.555078515783 0.585106406723445 0.17641621941225
82.575302131474 0.319148949121879 0.130292012882345
82.5955257471651 0.691489389764071 0.191784650094897
82.6157493628562 0.691489389764071 0.191784650094897
82.6359729785472 0.585106406723445 0.17641621941225
82.6561965942383 0.372340440642192 0.14073145842735
82.6764202099293 0.744680881284384 0.199024337160503
82.6966438256204 0.478723423682818 0.159574474560939
82.7168674413115 0.425531932162505 0.150448257421761
82.7370910570025 0.425531932162505 0.150448257421761
82.7573146726936 0.372340440642192 0.14073145842735
82.7775382883847 0.691489389764071 0.191784650094897
82.7977619040757 0.691489389764071 0.191784650094897
82.8179855197668 0.531914915203132 0.168206265345722
82.8382091354579 0.691489389764071 0.191784650094897
82.8584327511489 0.638297898243758 0.184260731687103
82.87865636684 0.372340440642192 0.14073145842735
82.8988799825311 0.585106406723445 0.17641621941225
82.9191035982221 0.265957457601566 0.118939790864024
82.9393272139132 0.425531932162505 0.150448257421761
82.9595508296043 0.372340440642192 0.14073145842735
82.9797744452953 0.319148949121879 0.130292012882345
82.9999980609864 0.372340440642192 0.14073145842735
83.0202216766775 0.478723423682818 0.159574474560939
83.0404452923685 0.531914915203132 0.168206265345722
83.0606689080596 0.478723423682818 0.159574474560939
83.0808925237507 0.319148949121879 0.130292012882345
83.1011161394417 0.265957457601566 0.118939790864024
83.1213397551328 0.531914915203132 0.168206265345722
83.1415633708239 0.425531932162505 0.150448257421761
83.1617869865149 0.478723423682818 0.159574474560939
83.182010602206 0.372340440642192 0.14073145842735
83.2022342178971 0.265957457601566 0.118939790864024
83.2224578335881 0.425531932162505 0.150448257421761
83.2426814492792 0.531914915203132 0.168206265345722
83.2629050649703 0.319148949121879 0.130292012882345
83.2831286806613 0.585106406723445 0.17641621941225
83.3033522963524 0.265957457601566 0.118939790864024
83.3235759120435 0.319148949121879 0.130292012882345
83.3437995277345 0.319148949121879 0.130292012882345
83.3640231434256 0.425531932162505 0.150448257421761
83.3842467591167 0.372340440642192 0.14073145842735
83.4044703748077 0.478723423682818 0.159574474560939
83.4246939904988 0.212765966081253 0.106382983040626
83.4449176061898 0.425531932162505 0.150448257421761
83.4651412218809 0.638297898243758 0.184260731687103
83.485364837572 0.585106406723445 0.17641621941225
83.505588453263 0.372340440642192 0.14073145842735
83.5258120689541 0.585106406723445 0.17641621941225
83.5460356846452 0.425531932162505 0.150448257421761
83.5662593003362 0.372340440642192 0.14073145842735
83.5864829160273 0.478723423682818 0.159574474560939
83.6067065317184 0.319148949121879 0.130292012882345
83.6269301474094 0.319148949121879 0.130292012882345
83.6471537631005 0.478723423682818 0.159574474560939
83.6673773787916 0.372340440642192 0.14073145842735
83.6876009944826 0.159574474560939 0.0921303658435515
83.7078246101737 0.691489389764071 0.191784650094897
83.7280482258648 0.478723423682818 0.159574474560939
83.7482718415558 0.319148949121879 0.130292012882345
83.7684954572469 0.372340440642192 0.14073145842735
83.788719072938 0.531914915203132 0.168206265345722
83.808942688629 0.425531932162505 0.150448257421761
83.8291663043201 0.531914915203132 0.168206265345722
83.8493899200112 0.425531932162505 0.150448257421761
83.8696135357022 0.531914915203132 0.168206265345722
83.8898371513933 0.319148949121879 0.130292012882345
83.9100607670844 0.265957457601566 0.118939790864024
83.9302843827754 0.265957457601566 0.118939790864024
83.9505079984665 0.478723423682818 0.159574474560939
83.9707316141576 0.319148949121879 0.130292012882345
83.9909552298486 0.691489389764071 0.191784650094897
84.0111788455397 0.425531932162505 0.150448257421761
84.0314024612308 0.425531932162505 0.150448257421761
84.0516260769218 0.691489389764071 0.191784650094897
84.0718496926129 0.744680881284384 0.199024337160503
84.092073308304 0.372340440642192 0.14073145842735
84.112296923995 0.638297898243758 0.184260731687103
84.1325205396861 0.319148949121879 0.130292012882345
84.1527441553772 0.0531914915203132 0.0531914915203132
84.1729677710682 0.425531932162505 0.150448257421761
84.1931913867593 0.425531932162505 0.150448257421761
84.2134150024503 0.425531932162505 0.150448257421761
84.2336386181414 0.585106406723445 0.17641621941225
84.2538622338325 0.265957457601566 0.118939790864024
84.2740858495235 0.585106406723445 0.17641621941225
84.2943094652146 0.425531932162505 0.150448257421761
84.3145330809057 0.425531932162505 0.150448257421761
84.3347566965967 0.212765966081253 0.106382983040626
84.3549803122878 0.638297898243758 0.184260731687103
84.3752039279789 0.425531932162505 0.150448257421761
84.3954275436699 0.478723423682818 0.159574474560939
84.415651159361 0.478723423682818 0.159574474560939
84.4358747750521 0.478723423682818 0.159574474560939
84.4560983907431 0.478723423682818 0.159574474560939
84.4763220064342 0.265957457601566 0.118939790864024
84.4965456221253 0.212765966081253 0.106382983040626
84.5167692378163 0.691489389764071 0.191784650094897
84.5369928535074 0.372340440642192 0.14073145842735
84.5572164691985 0.531914915203132 0.168206265345722
84.5774400848895 0.478723423682818 0.159574474560939
84.5976637005806 0.265957457601566 0.118939790864024
84.6178873162717 0.531914915203132 0.168206265345722
84.6381109319627 0.531914915203132 0.168206265345722
84.6583345476538 0.372340440642192 0.14073145842735
84.6785581633449 0.425531932162505 0.150448257421761
84.6987817790359 0.425531932162505 0.150448257421761
84.719005394727 0.478723423682818 0.159574474560939
84.7392290104181 0.585106406723445 0.17641621941225
84.7594526261091 0.319148949121879 0.130292012882345
84.7796762418002 0.159574474560939 0.0921303658435515
84.7998998574913 0.372340440642192 0.14073145842735
84.8201234731823 0.585106406723445 0.17641621941225
84.8403470888734 0.531914915203132 0.168206265345722
84.8605707045645 0.319148949121879 0.130292012882345
84.8807943202555 0.478723423682818 0.159574474560939
84.9010179359466 0.425531932162505 0.150448257421761
84.9212415516377 0.478723423682818 0.159574474560939
84.9414651673287 0.212765966081253 0.106382983040626
84.9616887830198 0.425531932162505 0.150448257421761
84.9819123987108 0.425531932162505 0.150448257421761
85.0021360144019 0.319148949121879 0.130292012882345
85.022359630093 0.319148949121879 0.130292012882345
85.042583245784 0.478723423682818 0.159574474560939
85.0628068614751 0.638297898243758 0.184260731687103
85.0830304771662 0.425531932162505 0.150448257421761
85.1032540928572 0.478723423682818 0.159574474560939
85.1234777085483 0.265957457601566 0.118939790864024
85.1437013242394 0.531914915203132 0.168206265345722
85.1639249399304 0.425531932162505 0.150448257421761
85.1841485556215 0.372340440642192 0.14073145842735
85.2043721713126 0.478723423682818 0.159574474560939
85.2245957870036 0.106382983040626 0.0752241287108804
85.2448194026947 0.425531932162505 0.150448257421761
85.2650430183858 0.265957457601566 0.118939790864024
85.2852666340768 0.478723423682818 0.159574474560939
85.3054902497679 0.159574474560939 0.0921303658435515
85.325713865459 0.372340440642192 0.14073145842735
85.34593748115 0.478723423682818 0.159574474560939
85.3661610968411 0.372340440642192 0.14073145842735
85.3863847125322 0.585106406723445 0.17641621941225
85.4066083282232 0.159574474560939 0.0921303658435515
85.4268319439143 0.691489389764071 0.191784650094897
85.4470555596054 0.691489389764071 0.191784650094897
85.4672791752964 0.265957457601566 0.118939790864024
85.4875027909875 0.265957457601566 0.118939790864024
85.5077264066786 0.319148949121879 0.130292012882345
85.5279500223696 0.372340440642192 0.14073145842735
85.5481736380607 0.319148949121879 0.130292012882345
85.5683972537518 0.212765966081253 0.106382983040626
85.5886208694428 0.478723423682818 0.159574474560939
85.6088444851339 0.638297898243758 0.184260731687103
85.629068100825 0.638297898243758 0.184260731687103
85.649291716516 0.372340440642192 0.14073145842735
85.6695153322071 0.425531932162505 0.150448257421761
85.6897389478981 0.478723423682818 0.159574474560939
85.7099625635892 0.159574474560939 0.0921303658435515
85.7301861792803 0.425531932162505 0.150448257421761
85.7504097949713 0.319148949121879 0.130292012882345
85.7706334106624 0.585106406723445 0.17641621941225
85.7908570263535 0.478723423682818 0.159574474560939
85.8110806420445 0.531914915203132 0.168206265345722
85.8313042577356 0.372340440642192 0.14073145842735
85.8515278734267 0.265957457601566 0.118939790864024
85.8717514891177 0.638297898243758 0.184260731687103
85.8919751048088 0.212765966081253 0.106382983040626
85.9121987204999 0.691489389764071 0.191784650094897
85.9324223361909 0.425531932162505 0.150448257421761
85.952645951882 0.691489389764071 0.191784650094897
85.9728695675731 0.265957457601566 0.118939790864024
85.9930931832641 0.372340440642192 0.14073145842735
86.0133167989552 0.319148949121879 0.130292012882345
86.0335404146463 0.159574474560939 0.0921303658435515
86.0537640303373 0.531914915203132 0.168206265345722
86.0739876460284 0.585106406723445 0.17641621941225
86.0942112617195 0.372340440642192 0.14073145842735
86.1144348774105 0.372340440642192 0.14073145842735
86.1346584931016 0.265957457601566 0.118939790864024
86.1548821087927 0.425531932162505 0.150448257421761
86.1751057244837 0.531914915203132 0.168206265345722
86.1953293401748 0.319148949121879 0.130292012882345
86.2155529558659 0.638297898243758 0.184260731687103
86.2357765715569 0.212765966081253 0.106382983040626
86.256000187248 0.691489389764071 0.191784650094897
86.2762238029391 0.265957457601566 0.118939790864024
86.2964474186301 0.372340440642192 0.14073145842735
86.3166710343212 0.425531932162505 0.150448257421761
86.3368946500123 0.691489389764071 0.191784650094897
86.3571182657033 0.265957457601566 0.118939790864024
86.3773418813944 0.212765966081253 0.106382983040626
86.3975654970855 0.638297898243758 0.184260731687103
86.4177891127765 0.319148949121879 0.130292012882345
86.4380127284676 0.159574474560939 0.0921303658435515
86.4582363441586 0.478723423682818 0.159574474560939
86.4784599598497 0.425531932162505 0.150448257421761
86.4986835755408 0.744680881284384 0.199024337160503
86.5189071912318 0.478723423682818 0.159574474560939
86.5391308069229 0.425531932162505 0.150448257421761
86.559354422614 0.319148949121879 0.130292012882345
86.579578038305 0.478723423682818 0.159574474560939
86.5998016539961 0.531914915203132 0.168206265345722
86.6200252696872 0.425531932162505 0.150448257421761
86.6402488853782 0.372340440642192 0.14073145842735
86.6604725010693 0.425531932162505 0.150448257421761
86.6806961167604 0.372340440642192 0.14073145842735
86.7009197324514 0.372340440642192 0.14073145842735
86.7211433481425 0.638297898243758 0.184260731687103
86.7413669638336 0.425531932162505 0.150448257421761
86.7615905795246 0.372340440642192 0.14073145842735
86.7818141952157 0.159574474560939 0.0921303658435515
86.8020378109068 0.0531914915203132 0.0531914915203132
86.8222614265978 0.425531932162505 0.150448257421761
86.8424850422889 0.212765966081253 0.106382983040626
86.86270865798 0.265957457601566 0.118939790864024
86.882932273671 0.585106406723445 0.17641621941225
86.9031558893621 0.797872372804697 0.206009760818106
86.9233795050532 0.265957457601566 0.118939790864024
86.9436031207442 0.212765966081253 0.106382983040626
86.9638267364353 0.372340440642192 0.14073145842735
86.9840503521264 0.531914915203132 0.168206265345722
87.0042739678174 0.531914915203132 0.168206265345722
87.0244975835085 0.372340440642192 0.14073145842735
87.0447211991996 0.425531932162505 0.150448257421761
87.0649448148906 0.425531932162505 0.150448257421761
87.0851684305817 0.478723423682818 0.159574474560939
87.1053920462728 0.585106406723445 0.17641621941225
87.1256156619638 0.638297898243758 0.184260731687103
87.1458392776549 0.585106406723445 0.17641621941225
87.166062893346 0.106382983040626 0.0752241287108804
87.186286509037 0.372340440642192 0.14073145842735
87.2065101247281 0.265957457601566 0.118939790864024
87.2267337404191 0.585106406723445 0.17641621941225
87.2469573561102 0.585106406723445 0.17641621941225
87.2671809718013 0.585106406723445 0.17641621941225
87.2874045874923 0.319148949121879 0.130292012882345
87.3076282031834 0.265957457601566 0.118939790864024
87.3278518188745 0.478723423682818 0.159574474560939
87.3480754345655 0.372340440642192 0.14073145842735
87.3682990502566 0.212765966081253 0.106382983040626
87.3885226659477 0.531914915203132 0.168206265345722
87.4087462816387 0.319148949121879 0.130292012882345
87.4289698973298 0.372340440642192 0.14073145842735
87.4491935130209 0.265957457601566 0.118939790864024
87.4694171287119 0.265957457601566 0.118939790864024
87.489640744403 0.265957457601566 0.118939790864024
87.5098643600941 0.265957457601566 0.118939790864024
87.5300879757851 0.265957457601566 0.118939790864024
87.5503115914762 0.425531932162505 0.150448257421761
87.5705352071673 0.372340440642192 0.14073145842735
87.5907588228583 0.106382983040626 0.0752241287108804
87.6109824385494 0.265957457601566 0.118939790864024
87.6312060542405 0.265957457601566 0.118939790864024
87.6514296699315 0.265957457601566 0.118939790864024
87.6716532856226 0.478723423682818 0.159574474560939
87.6918769013137 0.159574474560939 0.0921303658435515
87.7121005170047 0.319148949121879 0.130292012882345
87.7323241326958 0.265957457601566 0.118939790864024
87.7525477483869 0.212765966081253 0.106382983040626
87.7727713640779 0.372340440642192 0.14073145842735
87.792994979769 0.265957457601566 0.118939790864024
87.8132185954601 0.212765966081253 0.106382983040626
87.8334422111511 0.265957457601566 0.118939790864024
87.8536658268422 0.159574474560939 0.0921303658435515
87.8738894425333 0.159574474560939 0.0921303658435515
87.8941130582243 0.319148949121879 0.130292012882345
87.9143366739154 0.319148949121879 0.130292012882345
87.9345602896065 0.212765966081253 0.106382983040626
87.9547839052975 0.478723423682818 0.159574474560939
87.9750075209886 0.425531932162505 0.150448257421761
87.9952311366796 0.212765966081253 0.106382983040626
88.0154547523707 0.159574474560939 0.0921303658435515
88.0356783680618 0.265957457601566 0.118939790864024
88.0559019837528 0.372340440642192 0.14073145842735
88.0761255994439 0.531914915203132 0.168206265345722
88.096349215135 0.106382983040626 0.0752241287108804
88.116572830826 0.0531914915203132 0.0531914915203132
88.1367964465171 0.478723423682818 0.159574474560939
88.1570200622082 0.319148949121879 0.130292012882345
88.1772436778992 0.425531932162505 0.150448257421761
88.1974672935903 0.319148949121879 0.130292012882345
88.2176909092814 0.319148949121879 0.130292012882345
88.2379145249724 0.212765966081253 0.106382983040626
88.2581381406635 0.478723423682818 0.159574474560939
88.2783617563546 0.372340440642192 0.14073145842735
88.2985853720456 0.212765966081253 0.106382983040626
88.3188089877367 0.372340440642192 0.14073145842735
88.3390326034278 0.106382983040626 0.0752241287108804
88.3592562191188 0.319148949121879 0.130292012882345
88.3794798348099 0.212765966081253 0.106382983040626
88.399703450501 0.212765966081253 0.106382983040626
88.419927066192 0.265957457601566 0.118939790864024
88.4401506818831 0.319148949121879 0.130292012882345
88.4603742975742 0.319148949121879 0.130292012882345
88.4805979132652 0.425531932162505 0.150448257421761
88.5008215289563 0.212765966081253 0.106382983040626
88.5210451446474 0.425531932162505 0.150448257421761
88.5412687603384 0.319148949121879 0.130292012882345
88.5614923760295 0.212765966081253 0.106382983040626
88.5817159917206 0.372340440642192 0.14073145842735
88.6019396074116 0.212765966081253 0.106382983040626
88.6221632231027 0.372340440642192 0.14073145842735
88.6423868387938 0.265957457601566 0.118939790864024
88.6626104544848 0.265957457601566 0.118939790864024
88.6828340701759 0.531914915203132 0.168206265345722
88.703057685867 0.265957457601566 0.118939790864024
88.723281301558 0.319148949121879 0.130292012882345
88.7435049172491 0.212765966081253 0.106382983040626
88.7637285329401 0.478723423682818 0.159574474560939
88.7839521486312 0.265957457601566 0.118939790864024
88.8041757643223 0.212765966081253 0.106382983040626
88.8243993800133 0.265957457601566 0.118939790864024
88.8446229957044 0.212765966081253 0.106382983040626
88.8648466113955 0.265957457601566 0.118939790864024
88.8850702270865 0.478723423682818 0.159574474560939
88.9052938427776 0.425531932162505 0.150448257421761
88.9255174584687 0.212765966081253 0.106382983040626
88.9457410741597 0.319148949121879 0.130292012882345
88.9659646898508 0.372340440642192 0.14073145842735
88.9861883055419 0.212765966081253 0.106382983040626
89.0064119212329 0.212765966081253 0.106382983040626
89.026635536924 0.106382983040626 0.0752241287108804
89.0468591526151 0.265957457601566 0.118939790864024
89.0670827683061 0.265957457601566 0.118939790864024
89.0873063839972 0.159574474560939 0.0921303658435515
89.1075299996883 0.425531932162505 0.150448257421761
89.1277536153793 0.212765966081253 0.106382983040626
89.1479772310704 0.691489389764071 0.191784650094897
89.1682008467615 0.106382983040626 0.0752241287108804
89.1884244624525 0.265957457601566 0.118939790864024
89.2086480781436 0.319148949121879 0.130292012882345
89.2288716938347 0.478723423682818 0.159574474560939
89.2490953095257 0.425531932162505 0.150448257421761
89.2693189252168 0.372340440642192 0.14073145842735
89.2895425409079 0.212765966081253 0.106382983040626
89.3097661565989 0.319148949121879 0.130292012882345
89.32998977229 0.265957457601566 0.118939790864024
89.3502133879811 0.212765966081253 0.106382983040626
89.3704370036721 0.319148949121879 0.130292012882345
89.3906606193632 0 0
89.4108842350543 0.265957457601566 0.118939790864024
89.4311078507453 0.372340440642192 0.14073145842735
89.4513314664364 0.106382983040626 0.0752241287108804
89.4715550821275 0.106382983040626 0.0752241287108804
89.4917786978185 0.265957457601566 0.118939790864024
89.5120023135096 0.106382983040626 0.0752241287108804
89.5322259292006 0.106382983040626 0.0752241287108804
89.5524495448917 0.265957457601566 0.118939790864024
89.5726731605828 0.319148949121879 0.130292012882345
89.5928967762738 0.425531932162505 0.150448257421761
89.6131203919649 0.478723423682818 0.159574474560939
89.633344007656 0.531914915203132 0.168206265345722
89.653567623347 0.372340440642192 0.14073145842735
89.6737912390381 0.319148949121879 0.130292012882345
89.6940148547292 0.372340440642192 0.14073145842735
89.7142384704202 0.159574474560939 0.0921303658435515
89.7344620861113 0.212765966081253 0.106382983040626
89.7546857018024 0.212765966081253 0.106382983040626
89.7749093174934 0.372340440642192 0.14073145842735
89.7951329331845 0.265957457601566 0.118939790864024
89.8153565488756 0.159574474560939 0.0921303658435515
89.8355801645666 0.159574474560939 0.0921303658435515
89.8558037802577 0.106382983040626 0.0752241287108804
89.8760273959488 0.265957457601566 0.118939790864024
89.8962510116398 0.319148949121879 0.130292012882345
89.9164746273309 0.212765966081253 0.106382983040626
89.936698243022 0.372340440642192 0.14073145842735
89.956921858713 0.159574474560939 0.0921303658435515
89.9771454744041 0.319148949121879 0.130292012882345
89.9973690900952 0.106382983040626 0.0752241287108804
