# Supplementary material for: Gd3+-Doped Magnetic Nanoparticles for Biomedical Applications
Source: Hindawi journal article supplement (doi:10.1155/2018/1412563), 2018-08-02
Supplement: f1 [file 1412563.f1.zip › MNP-Gd5.1.xye]

'Id: "" Comment: "" Operator: "Lab Manager" Anode: "Cu" Scantype: "Coupled TwoTheta/Theta" TimePerStep: "18.8" 
4.99751234054565 3.51063844034067 0.432129719910892
5.01773595623672 3.29787247425942 0.418830223061378
5.03795957192779 2.8191490505766 0.387239903442613
5.05818318761885 3.13829799969848 0.408571598914043
5.07840680330992 3.45744694882036 0.428843514653201
5.09863041900098 3.56382993186098 0.435391122555825
5.11885403469205 2.39361711841409 0.356819372592072
5.13907765038311 2.65957457601566 0.376120643554402
5.15930126607418 3.40425545730004 0.425531932162505
5.17952488176525 3.08510650817816 0.405094330581189
5.19974849745631 3.13829799969848 0.408571598914043
5.21997211314738 3.40425545730004 0.425531932162505
5.24019572883844 3.56382993186098 0.435391122555825
5.26041934452951 3.98936186402349 0.460651829217758
5.28064296022058 3.77659589794223 0.448199474208799
5.30086657591164 2.97872352513754 0.398048674321006
5.32109019160271 2.76595755905628 0.383569300189794
5.34131380729377 2.76595755905628 0.383569300189794
5.36153742298484 3.82978738946255 0.451344772265282
5.3817610386759 3.2446809827391 0.415438829407517
5.40198465436697 3.40425545730004 0.425531932162505
5.42220827005804 3.29787247425942 0.418830223061378
5.4424318857491 2.23404264385315 0.34472026390471
5.46265550144017 2.87234054209691 0.390876038647036
5.48287911713123 3.08510650817816 0.405094330581189
5.5031027328223 3.82978738946255 0.451344772265282
5.52332634851336 2.50000010145472 0.364662493543428
5.54354996420443 2.44680860993441 0.360762247785373
5.5637735798955 3.13829799969848 0.408571598914043
5.58399719558656 3.03191501665785 0.401586954343472
5.60422081127763 3.13829799969848 0.408571598914043
5.62444442696869 2.65957457601566 0.376120643554402
5.64466804265976 3.03191501665785 0.401586954343472
5.66489165835083 2.97872352513754 0.398048674321006
5.68511527404189 2.07446816929221 0.332180758076181
5.70533888973296 2.97872352513754 0.398048674321006
5.72556250542402 3.51063844034067 0.432129719910892
5.74578612111509 2.97872352513754 0.398048674321006
5.76600973680615 3.77659589794223 0.448199474208799
5.78623335249722 2.60638308449535 0.372340440642192
5.80645696818829 3.40425545730004 0.425531932162505
5.82668058387935 3.45744694882036 0.428843514653201
5.84690419957042 3.03191501665785 0.401586954343472
5.86712781526148 2.44680860993441 0.360762247785373
5.88735143095255 4.09574484706411 0.466753443803018
5.90757504664361 3.98936186402349 0.460651829217758
5.92779866233468 3.6170214233813 0.438628275844795
5.94802227802575 3.35106396577973 0.422194375282049
5.96824589371681 3.98936186402349 0.460651829217758
5.98846950940788 3.29787247425942 0.418830223061378
6.00869312509894 3.45744694882036 0.428843514653201
6.02891674079001 3.77659589794223 0.448199474208799
6.04914035648108 3.03191501665785 0.401586954343472
6.06936397217214 2.97872352513754 0.398048674321006
6.08958758786321 2.97872352513754 0.398048674321006
6.10981120355427 2.65957457601566 0.376120643554402
6.13003481924534 3.67021291490161 0.441841712766838
6.1502584349364 2.87234054209691 0.390876038647036
6.17048205062747 3.56382993186098 0.435391122555825
6.19070566631854 4.25531932162505 0.475759163456095
6.2109292820096 3.98936186402349 0.460651829217758
6.23115289770067 2.76595755905628 0.383569300189794
6.25137651339173 2.44680860993441 0.360762247785373
6.2716001290828 3.93617037250317 0.457570511496874
6.29182374477386 4.14893633858443 0.469774533230711
6.31204736046493 3.82978738946255 0.451344772265282
6.332270976156 4.30851081314537 0.478723423682818
6.35249459184706 3.51063844034067 0.432129719910892
6.37271820753813 4.30851081314537 0.478723423682818
6.39294182322919 3.77659589794223 0.448199474208799
6.41316543892026 3.51063844034067 0.432129719910892
6.43338905461133 4.25531932162505 0.475759163456095
6.45361267030239 4.20212783010474 0.472776317979537
6.47383628599346 3.13829799969848 0.408571598914043
6.49405990168452 3.2446809827391 0.415438829407517
6.51428351737559 4.25531932162505 0.475759163456095
6.53450713306665 3.77659589794223 0.448199474208799
6.55473074875772 4.25531932162505 0.475759163456095
6.57495436444879 3.77659589794223 0.448199474208799
6.59517798013985 3.93617037250317 0.457570511496874
6.61540159583092 3.6170214233813 0.438628275844795
6.63562521152198 4.8404257283485 0.507414489430638
6.65584882721305 4.20212783010474 0.472776317979537
6.67607244290411 4.25531932162505 0.475759163456095
6.69629605859518 3.40425545730004 0.425531932162505
6.71651967428625 3.6170214233813 0.438628275844795
6.73674328997731 3.13829799969848 0.408571598914043
6.75696690566838 3.51063844034067 0.432129719910892
6.77719052135944 5.00000020290944 0.515710644057907
6.79741413705051 4.36170230466568 0.481669441788406
6.81763775274158 3.98936186402349 0.460651829217758
6.83786136843264 4.25531932162505 0.475759163456095
6.85808498412371 3.6170214233813 0.438628275844795
6.87830859981477 4.94680871138912 0.512960167678218
6.89853221550584 3.98936186402349 0.460651829217758
6.9187558311969 4.52127677922662 0.490401320821245
6.93897944688797 4.41489379618599 0.48459755047143
6.95920306257904 4.52127677922662 0.490401320821245
6.9794266782701 3.93617037250317 0.457570511496874
6.99965029396117 5.265957660511 0.529248658236749
7.01987390965223 4.14893633858443 0.469774533230711
7.0400975253433 4.57446827074693 0.493277599565779
7.06032114103436 4.8404257283485 0.507414489430638
7.08054475672543 4.78723423682818 0.504618796037166
7.1007683724165 4.8404257283485 0.507414489430638
7.12099198810756 4.30851081314537 0.478723423682818
7.14121560379863 4.68085125378756 0.498980420230782
7.16143921948969 5.15957467747038 0.523875436249008
7.18166283518076 4.41489379618599 0.48459755047143
7.20188645087183 3.56382993186098 0.435391122555825
7.22211006656289 5.95744705027507 0.562925833709398
7.24233368225396 4.30851081314537 0.478723423682818
7.26255729794502 4.68085125378756 0.498980420230782
7.28278091363609 5.37234064355163 0.534567873881054
7.30300452932715 4.25531932162505 0.475759163456095
7.32322814501822 4.89361721986881 0.510194863610278
7.34345176070929 4.73404274530787 0.501807527388583
7.36367537640035 5.265957660511 0.529248658236749
7.38389899209142 4.09574484706411 0.466753443803018
7.40412260778248 5.74468108419382 0.552782195061309
7.42434622347355 5.05319169442975 0.518446528742142
7.44456983916461 6.70212793155946 0.59707301148151
7.46479345485568 4.46808528770631 0.487508072438874
7.48501707054675 5.6382981011532 0.547639923340591
7.50524068623781 4.62765976226725 0.49613720380912
7.52546430192888 5.58510660963288 0.545050594776606
7.54568791761994 5.74468108419382 0.552782195061309
7.56591153331101 5.21276616899069 0.526568900976162
7.58613514900208 6.01063854179539 0.565433310857768
7.60635876469314 5.37234064355163 0.534567873881054
7.62658238038421 5.79787257571413 0.555335475138186
7.64680599607527 6.8617024061204 0.604139210240542
7.66702961176634 5.10638318595006 0.521168051529382
7.6872532274574 6.27659599939695 0.5778074963847
7.70747684314847 6.27659599939695 0.5778074963847
7.72770045883954 5.69148959267351 0.550217066626112
7.7479240745306 5.74468108419382 0.552782195061309
7.76814769022167 5.69148959267351 0.550217066626112
7.78837130591273 5.47872362659226 0.539834679625181
7.8085949216038 6.59574494851883 0.59231538178515
7.82881853729486 6.43617047395789 0.585106406723445
7.84904215298593 5.79787257571413 0.555335475138186
7.869265768677 7.55319179588447 0.633849775074574
7.88948938436806 5.42553213507194 0.537207731288247
7.90971300005913 5.6382981011532 0.547639923340591
7.92993661575019 6.43617047395789 0.585106406723445
7.95016023144126 5.95744705027507 0.562925833709398
7.97038384713233 6.11702152483601 0.570415198401908
7.99060746282339 5.85106406723445 0.55787706953872
8.01083107851446 6.27659599939695 0.5778074963847
8.03105469420552 5.15957467747038 0.523875436249008
8.05127830989659 6.22340450787664 0.575353950284691
8.07150192558765 5.79787257571413 0.555335475138186
8.09172554127872 6.17021301635633 0.572889896348368
8.11194915696979 6.80851091460008 0.601793029687043
8.13217277266085 6.43617047395789 0.585106406723445
8.15239638835192 6.0638300333157 0.567929717304644
8.17262000404298 6.43617047395789 0.585106406723445
8.19284361973405 6.17021301635633 0.572889896348368
8.21306723542511 6.96808538916102 0.608804447167049
8.23329085111618 6.54255345699852 0.5899221785364
8.25351446680725 6.27659599939695 0.5778074963847
8.27373808249831 5.85106406723445 0.55787706953872
8.29396169818938 6.48936196547821 0.587519226884514
8.31418531388044 5.265957660511 0.529248658236749
8.33440892957151 7.2872343382829 0.622590446048853
8.35463254526258 7.44680881284384 0.629370215232479
8.37485616095364 7.02127688068134 0.611123710602471
8.39507977664471 6.48936196547821 0.587519226884514
8.41530339233577 6.64893644003915 0.594698954320119
8.43552700802684 6.32978749091727 0.580250667943183
8.4557506237179 7.76595776196572 0.64271523744401
8.47597423940897 7.81914925348604 0.64491256090486
8.49619785510004 7.39361732132353 0.62711843622367
8.5164214707911 7.34042582980322 0.624858542617019
8.53664508648217 7.39361732132353 0.62711843622367
8.55686870217323 7.02127688068134 0.611123710602471
8.5770923178643 6.8617024061204 0.604139210240542
8.59731593355536 6.96808538916102 0.608804447167049
8.61753954924643 7.92553223652666 0.64928489952653
8.6377631649375 6.96808538916102 0.608804447167049
8.65798678062856 6.54255345699852 0.5899221785364
8.67821039631963 7.44680881284384 0.629370215232479
8.69843401201069 7.18085135524228 0.618029282454318
8.71865762770176 5.21276616899069 0.526568900976162
8.73888124339283 6.01063854179539 0.565433310857768
8.75910485908389 6.70212793155946 0.59707301148151
8.77932847477496 7.87234074500635 0.647102423100873
8.79955209046602 8.19148969412823 0.660089050510576
8.81977570615709 6.8617024061204 0.604139210240542
8.83999932184815 6.64893644003915 0.594698954320119
8.86022293753922 6.43617047395789 0.585106406723445
8.88044655323029 7.18085135524228 0.618029282454318
8.90067016892135 6.70212793155946 0.59707301148151
8.92089378461242 7.18085135524228 0.618029282454318
8.94111740030348 6.75531942307977 0.599437666325494
8.96134101599455 8.56383013477042 0.674924364647657
8.98156463168561 6.59574494851883 0.59231538178515
9.00178824737668 7.2872343382829 0.622590446048853
9.02201186306775 7.12765986372196 0.615736030455294
9.04223547875881 6.48936196547821 0.587519226884514
9.06245909444988 6.0638300333157 0.567929717304644
9.08268271014094 7.02127688068134 0.611123710602471
9.10290632583201 7.12765986372196 0.615736030455294
9.12312994152308 7.07446837220165 0.613434205461912
9.14335355721414 6.96808538916102 0.608804447167049
9.16357717290521 7.6595747789251 0.638297898243758
9.18380078859627 7.18085135524228 0.618029282454318
9.20402440428734 6.64893644003915 0.594698954320119
9.2242480199784 6.70212793155946 0.59707301148151
9.24447163566947 7.39361732132353 0.62711843622367
9.26469525136054 6.54255345699852 0.5899221785364
9.2849188670516 6.43617047395789 0.585106406723445
9.30514248274267 6.8617024061204 0.604139210240542
9.32536609843373 6.54255345699852 0.5899221785364
9.3455897141248 7.12765986372196 0.615736030455294
9.36581332981586 7.55319179588447 0.633849775074574
9.38603694550693 7.6595747789251 0.638297898243758
9.406260561198 7.50000030436416 0.631613966431975
9.42648417688906 6.43617047395789 0.585106406723445
9.44670779258013 6.17021301635633 0.572889896348368
9.46693140827119 7.60638328740478 0.636077724914372
9.48715502396226 7.44680881284384 0.629370215232479
9.50737863965333 6.96808538916102 0.608804447167049
9.52760225534439 6.91489389764071 0.606476314558303
9.54782587103546 6.17021301635633 0.572889896348368
9.56804948672652 7.87234074500635 0.647102423100873
9.58827310241759 6.59574494851883 0.59231538178515
9.60849671810865 7.44680881284384 0.629370215232479
9.62872033379972 6.8617024061204 0.604139210240542
9.64894394949079 6.8617024061204 0.604139210240542
9.66916756518185 6.8617024061204 0.604139210240542
9.68939118087292 7.02127688068134 0.611123710602471
9.70961479656398 6.48936196547821 0.587519226884514
9.72983841225505 8.13829820260791 0.657942413767192
9.75006202794611 7.76595776196572 0.64271523744401
9.77028564363718 5.95744705027507 0.562925833709398
9.79050925932825 7.6595747789251 0.638297898243758
9.81073287501931 6.43617047395789 0.585106406723445
9.83095649071038 7.07446837220165 0.613434205461912
9.85118010640144 7.71276627044541 0.640510375928879
9.87140372209251 6.8617024061204 0.604139210240542
9.89162733778358 8.0851067110876 0.655788750333248
9.91185095347464 7.50000030436416 0.631613966431975
9.93207456916571 8.8829790838923 0.687385558923066
9.95229818485677 6.11702152483601 0.570415198401908
9.97252180054784 7.12765986372196 0.615736030455294
9.9927454162389 6.32978749091727 0.580250667943183
10.01296903193 6.96808538916102 0.608804447167049
10.033192647621 6.8617024061204 0.604139210240542
10.0534162633121 6.48936196547821 0.587519226884514
10.0736398790032 6.70212793155946 0.59707301148151
10.0938634946942 6.8617024061204 0.604139210240542
10.1140871103853 6.96808538916102 0.608804447167049
10.1343107260764 6.70212793155946 0.59707301148151
10.1545343417674 6.38297898243758 0.582683595460406
10.1747579574585 6.17021301635633 0.572889896348368
10.1949815731496 7.2872343382829 0.622590446048853
10.2152051888406 7.39361732132353 0.62711843622367
10.2354288045317 5.6382981011532 0.547639923340591
10.2556524202228 6.91489389764071 0.606476314558303
10.2758760359138 7.81914925348604 0.64491256090486
10.2960996516049 7.07446837220165 0.613434205461912
10.316323267296 6.27659599939695 0.5778074963847
10.336546882987 6.96808538916102 0.608804447167049
10.3567704986781 6.91489389764071 0.606476314558303
10.3769941143692 7.81914925348604 0.64491256090486
10.3972177300602 5.85106406723445 0.55787706953872
10.4174413457513 7.55319179588447 0.633849775074574
10.4376649614424 5.90425555875476 0.560407137255822
10.4578885771334 7.18085135524228 0.618029282454318
10.4781121928245 7.6595747789251 0.638297898243758
10.4983358085155 7.18085135524228 0.618029282454318
10.5185594242066 6.43617047395789 0.585106406723445
10.5387830398977 7.34042582980322 0.624858542617019
10.5590066555887 6.8617024061204 0.604139210240542
10.5792302712798 7.12765986372196 0.615736030455294
10.5994538869709 6.27659599939695 0.5778074963847
10.6196775026619 8.03191521956729 0.653627990751228
10.639901118353 6.54255345699852 0.5899221785364
10.6601247340441 8.19148969412823 0.660089050510576
10.6803483497351 7.07446837220165 0.613434205461912
10.7005719654262 6.59574494851883 0.59231538178515
10.7207955811173 7.81914925348604 0.64491256090486
10.7410191968083 6.96808538916102 0.608804447167049
10.7612428124994 6.38297898243758 0.582683595460406
10.7814664281905 6.01063854179539 0.565433310857768
10.8016900438815 6.22340450787664 0.575353950284691
10.8219136595726 7.34042582980322 0.624858542617019
10.8421372752637 8.24468118564854 0.662228728895168
10.8623608909547 7.76595776196572 0.64271523744401
10.8825845066458 6.32978749091727 0.580250667943183
10.9028081223369 5.74468108419382 0.552782195061309
10.9230317380279 7.2872343382829 0.622590446048853
10.943255353719 7.34042582980322 0.624858542617019
10.9634789694101 6.27659599939695 0.5778074963847
10.9837025851011 6.43617047395789 0.585106406723445
11.0039262007922 7.71276627044541 0.640510375928879
11.0241498164833 6.96808538916102 0.608804447167049
11.0443734321743 6.75531942307977 0.599437666325494
11.0645970478654 7.92553223652666 0.64928489952653
11.0848206635565 8.35106416868917 0.666487478437833
11.1050442792475 7.23404284676259 0.620314056540036
11.1252678949386 7.12765986372196 0.615736030455294
11.1454915106297 5.74468108419382 0.552782195061309
11.1657151263207 5.90425555875476 0.560407137255822
11.1859387420118 7.12765986372196 0.615736030455294
11.2061623577029 7.12765986372196 0.615736030455294
11.2263859733939 6.54255345699852 0.5899221785364
11.246609589085 7.71276627044541 0.640510375928879
11.266833204776 8.29787267716885 0.664361516152362
11.2870568204671 7.2872343382829 0.622590446048853
11.3072804361582 7.34042582980322 0.624858542617019
11.3275040518492 6.70212793155946 0.59707301148151
11.3477276675403 8.35106416868917 0.666487478437833
11.3679512832314 7.18085135524228 0.618029282454318
11.3881748989224 5.74468108419382 0.552782195061309
11.4083985146135 7.34042582980322 0.624858542617019
11.4286221303046 6.48936196547821 0.587519226884514
11.4488457459956 7.6595747789251 0.638297898243758
11.4690693616867 7.76595776196572 0.64271523744401
11.4892929773778 7.34042582980322 0.624858542617019
11.5095165930688 6.59574494851883 0.59231538178515
11.5297402087599 7.18085135524228 0.618029282454318
11.549963824451 7.2872343382829 0.622590446048853
11.570187440142 8.35106416868917 0.666487478437833
11.5904110558331 7.2872343382829 0.622590446048853
11.6106346715242 9.09574504997355 0.695569008579737
11.6308582872152 7.2872343382829 0.622590446048853
11.6510819029063 7.81914925348604 0.64491256090486
11.6713055185974 6.54255345699852 0.5899221785364
11.6915291342884 7.23404284676259 0.620314056540036
11.7117527499795 6.11702152483601 0.570415198401908
11.7319763656706 6.48936196547821 0.587519226884514
11.7521999813616 7.07446837220165 0.613434205461912
11.7724235970527 7.6595747789251 0.638297898243758
11.7926472127438 6.91489389764071 0.606476314558303
11.8128708284348 6.91489389764071 0.606476314558303
11.8330944441259 7.81914925348604 0.64491256090486
11.853318059817 7.55319179588447 0.633849775074574
11.873541675508 6.96808538916102 0.608804447167049
11.8937652911991 7.39361732132353 0.62711843622367
11.9139889068902 6.32978749091727 0.580250667943183
11.9342125225812 7.39361732132353 0.62711843622367
11.9544361382723 6.48936196547821 0.587519226884514
11.9746597539634 7.71276627044541 0.640510375928879
11.9948833696544 7.71276627044541 0.640510375928879
12.0151069853455 6.59574494851883 0.59231538178515
12.0353306010365 8.61702162629073 0.677017158397923
12.0555542167276 7.12765986372196 0.615736030455294
12.0757778324187 6.01063854179539 0.565433310857768
12.0960014481097 7.23404284676259 0.620314056540036
12.1162250638008 7.60638328740478 0.636077724914372
12.1364486794919 5.95744705027507 0.562925833709398
12.1566722951829 7.02127688068134 0.611123710602471
12.176895910874 6.48936196547821 0.587519226884514
12.1971195265651 7.44680881284384 0.629370215232479
12.2173431422561 7.50000030436416 0.631613966431975
12.2375667579472 6.43617047395789 0.585106406723445
12.2577903736383 7.39361732132353 0.62711843622367
12.2780139893293 7.23404284676259 0.620314056540036
12.2982376050204 7.34042582980322 0.624858542617019
12.3184612207115 8.0851067110876 0.655788750333248
12.3386848364025 7.18085135524228 0.618029282454318
12.3589084520936 8.67021311781104 0.679103502814817
12.3791320677847 6.96808538916102 0.608804447167049
12.3993556834757 6.32978749091727 0.580250667943183
12.4195792991668 7.6595747789251 0.638297898243758
12.4398029148579 7.02127688068134 0.611123710602471
12.4600265305489 7.23404284676259 0.620314056540036
12.48025014624 6.80851091460008 0.601793029687043
12.5004737619311 7.76595776196572 0.64271523744401
12.5206973776221 5.58510660963288 0.545050594776606
12.5409209933132 7.92553223652666 0.64928489952653
12.5611446090043 7.2872343382829 0.622590446048853
12.5813682246953 8.03191521956729 0.653627990751228
12.6015918403864 7.71276627044541 0.640510375928879
12.6218154560775 7.81914925348604 0.64491256090486
12.6420390717685 7.87234074500635 0.647102423100873
12.6622626874596 6.48936196547821 0.587519226884514
12.6824863031507 6.96808538916102 0.608804447167049
12.7027099188417 6.70212793155946 0.59707301148151
12.7229335345328 6.75531942307977 0.599437666325494
12.7431571502239 6.70212793155946 0.59707301148151
12.7633807659149 5.95744705027507 0.562925833709398
12.783604381606 7.12765986372196 0.615736030455294
12.803827997297 5.95744705027507 0.562925833709398
12.8240516129881 7.60638328740478 0.636077724914372
12.8442752286792 6.38297898243758 0.582683595460406
12.8644988443702 6.91489389764071 0.606476314558303
12.8847224600613 7.23404284676259 0.620314056540036
12.9049460757524 7.60638328740478 0.636077724914372
12.9251696914434 6.70212793155946 0.59707301148151
12.9453933071345 6.91489389764071 0.606476314558303
12.9656169228256 6.96808538916102 0.608804447167049
12.9858405385166 7.34042582980322 0.624858542617019
13.0060641542077 7.02127688068134 0.611123710602471
13.0262877698988 7.76595776196572 0.64271523744401
13.0465113855898 7.6595747789251 0.638297898243758
13.0667350012809 7.50000030436416 0.631613966431975
13.086958616972 8.0851067110876 0.655788750333248
13.107182232663 6.54255345699852 0.5899221785364
13.1274058483541 7.92553223652666 0.64928489952653
13.1476294640452 7.02127688068134 0.611123710602471
13.1678530797362 7.39361732132353 0.62711843622367
13.1880766954273 7.34042582980322 0.624858542617019
13.2083003111184 7.55319179588447 0.633849775074574
13.2285239268094 6.17021301635633 0.572889896348368
13.2487475425005 6.38297898243758 0.582683595460406
13.2689711581916 7.07446837220165 0.613434205461912
13.2891947738826 7.12765986372196 0.615736030455294
13.3094183895737 7.71276627044541 0.640510375928879
13.3296420052648 7.23404284676259 0.620314056540036
13.3498656209558 7.07446837220165 0.613434205461912
13.3700892366469 8.19148969412823 0.660089050510576
13.390312852338 7.81914925348604 0.64491256090486
13.410536468029 6.8617024061204 0.604139210240542
13.4307600837201 7.02127688068134 0.611123710602471
13.4509836994112 7.2872343382829 0.622590446048853
13.4712073151022 7.71276627044541 0.640510375928879
13.4914309307933 7.92553223652666 0.64928489952653
13.5116545464844 7.44680881284384 0.629370215232479
13.5318781621754 7.81914925348604 0.64491256090486
13.5521017778665 8.77659610085167 0.683257079784517
13.5723253935575 7.2872343382829 0.622590446048853
13.5925490092486 6.54255345699852 0.5899221785364
13.6127726249397 6.96808538916102 0.608804447167049
13.6329962406307 8.13829820260791 0.657942413767192
13.6532198563218 7.50000030436416 0.631613966431975
13.6734434720129 7.71276627044541 0.640510375928879
13.6936670877039 8.24468118564854 0.662228728895168
13.713890703395 7.87234074500635 0.647102423100873
13.7341143190861 7.81914925348604 0.64491256090486
13.7543379347771 7.2872343382829 0.622590446048853
13.7745615504682 8.03191521956729 0.653627990751228
13.7947851661593 6.54255345699852 0.5899221785364
13.8150087818503 8.51063864325011 0.672825061382888
13.8352323975414 7.02127688068134 0.611123710602471
13.8554560132325 7.23404284676259 0.620314056540036
13.8756796289235 7.02127688068134 0.611123710602471
13.8959032446146 7.18085135524228 0.618029282454318
13.9161268603057 7.71276627044541 0.640510375928879
13.9363504759967 7.87234074500635 0.647102423100873
13.9565740916878 7.2872343382829 0.622590446048853
13.9767977073789 7.2872343382829 0.622590446048853
13.9970213230699 7.92553223652666 0.64928489952653
14.017244938761 8.35106416868917 0.666487478437833
14.0374685544521 7.60638328740478 0.636077724914372
14.0576921701431 6.91489389764071 0.606476314558303
14.0779157858342 7.23404284676259 0.620314056540036
14.0981394015253 7.55319179588447 0.633849775074574
14.1183630172163 7.60638328740478 0.636077724914372
14.1385866329074 8.67021311781104 0.679103502814817
14.1588102485985 6.8617024061204 0.604139210240542
14.1790338642895 7.44680881284384 0.629370215232479
14.1992574799806 7.07446837220165 0.613434205461912
14.2194810956717 7.23404284676259 0.620314056540036
14.2397047113627 7.18085135524228 0.618029282454318
14.2599283270538 8.29787267716885 0.664361516152362
14.2801519427449 6.75531942307977 0.599437666325494
14.3003755584359 7.2872343382829 0.622590446048853
14.320599174127 8.67021311781104 0.679103502814817
14.340822789818 6.91489389764071 0.606476314558303
14.3610464055091 8.45744715172979 0.670719187480671
14.3812700212002 8.35106416868917 0.666487478437833
14.4014936368912 6.91489389764071 0.606476314558303
14.4217172525823 6.80851091460008 0.601793029687043
14.4419408682734 7.81914925348604 0.64491256090486
14.4621644839644 6.48936196547821 0.587519226884514
14.4823880996555 7.12765986372196 0.615736030455294
14.5026117153466 6.80851091460008 0.601793029687043
14.5228353310376 6.80851091460008 0.601793029687043
14.5430589467287 8.40425566020948 0.668606680855476
14.5632825624198 8.13829820260791 0.657942413767192
14.5835061781108 7.02127688068134 0.611123710602471
14.6037297938019 7.97872372804697 0.651460064411727
14.623953409493 7.92553223652666 0.64928489952653
14.644177025184 8.0851067110876 0.655788750333248
14.6644006408751 7.39361732132353 0.62711843622367
14.6846242565662 8.82978759237199 0.685324428169477
14.7048478722572 8.51063864325011 0.672825061382888
14.7250714879483 8.51063864325011 0.672825061382888
14.7452951036394 7.07446837220165 0.613434205461912
14.7655187193304 7.81914925348604 0.64491256090486
14.7857423350215 7.55319179588447 0.633849775074574
14.8059659507126 8.19148969412823 0.660089050510576
14.8261895664036 7.39361732132353 0.62711843622367
14.8464131820947 7.18085135524228 0.618029282454318
14.8666367977858 7.87234074500635 0.647102423100873
14.8868604134768 7.81914925348604 0.64491256090486
14.9070840291679 8.98936206693292 0.691489389764071
14.927307644859 7.39361732132353 0.62711843622367
14.94753126055 8.19148969412823 0.660089050510576
14.9677548762411 7.44680881284384 0.629370215232479
14.9879784919322 6.75531942307977 0.599437666325494
15.0082021076232 7.12765986372196 0.615736030455294
15.0284257233143 7.60638328740478 0.636077724914372
15.0486493390054 6.80851091460008 0.601793029687043
15.0688729546964 8.35106416868917 0.666487478437833
15.0890965703875 6.8617024061204 0.604139210240542
15.1093201860785 7.55319179588447 0.633849775074574
15.1295438017696 7.2872343382829 0.622590446048853
15.1497674174607 7.02127688068134 0.611123710602471
15.1699910331517 7.39361732132353 0.62711843622367
15.1902146488428 8.19148969412823 0.660089050510576
15.2104382645339 6.70212793155946 0.59707301148151
15.2306618802249 7.39361732132353 0.62711843622367
15.250885495916 7.81914925348604 0.64491256090486
15.2711091116071 7.87234074500635 0.647102423100873
15.2913327272981 6.64893644003915 0.594698954320119
15.3115563429892 6.75531942307977 0.599437666325494
15.3317799586803 8.29787267716885 0.664361516152362
15.3520035743713 8.19148969412823 0.660089050510576
15.3722271900624 6.91489389764071 0.606476314558303
15.3924508057535 6.91489389764071 0.606476314558303
15.4126744214445 6.8617024061204 0.604139210240542
15.4328980371356 7.87234074500635 0.647102423100873
15.4531216528267 8.19148969412823 0.660089050510576
15.4733452685177 7.34042582980322 0.624858542617019
15.4935688842088 7.76595776196572 0.64271523744401
15.5137924998999 7.50000030436416 0.631613966431975
15.5340161155909 7.6595747789251 0.638297898243758
15.554239731282 6.59574494851883 0.59231538178515
15.5744633469731 7.39361732132353 0.62711843622367
15.5946869626641 7.87234074500635 0.647102423100873
15.6149105783552 8.45744715172979 0.670719187480671
15.6351341940463 7.44680881284384 0.629370215232479
15.6553578097373 7.92553223652666 0.64928489952653
15.6755814254284 7.6595747789251 0.638297898243758
15.6958050411195 8.0851067110876 0.655788750333248
15.7160286568105 7.12765986372196 0.615736030455294
15.7362522725016 7.76595776196572 0.64271523744401
15.7564758881927 8.0851067110876 0.655788750333248
15.7766995038837 7.2872343382829 0.622590446048853
15.7969231195748 7.23404284676259 0.620314056540036
15.8171467352659 6.91489389764071 0.606476314558303
15.8373703509569 6.75531942307977 0.599437666325494
15.857593966648 7.50000030436416 0.631613966431975
15.877817582339 7.34042582980322 0.624858542617019
15.8980411980301 7.92553223652666 0.64928489952653
15.9182648137212 7.44680881284384 0.629370215232479
15.9384884294122 6.64893644003915 0.594698954320119
15.9587120451033 7.92553223652666 0.64928489952653
15.9789356607944 8.29787267716885 0.664361516152362
15.9991592764854 7.34042582980322 0.624858542617019
16.0193828921765 6.70212793155946 0.59707301148151
16.0396065078676 7.97872372804697 0.651460064411727
16.0598301235586 7.55319179588447 0.633849775074574
16.0800537392497 8.56383013477042 0.674924364647657
16.1002773549408 7.76595776196572 0.64271523744401
16.1205009706318 7.07446837220165 0.613434205461912
16.1407245863229 7.92553223652666 0.64928489952653
16.160948202014 7.87234074500635 0.647102423100873
16.181171817705 6.8617024061204 0.604139210240542
16.2013954333961 8.77659610085167 0.683257079784517
16.2216190490872 7.6595747789251 0.638297898243758
16.2418426647782 8.82978759237199 0.685324428169477
16.2620662804693 8.45744715172979 0.670719187480671
16.2822898961604 8.0851067110876 0.655788750333248
16.3025135118514 7.6595747789251 0.638297898243758
16.3227371275425 8.56383013477042 0.674924364647657
16.3429607432336 6.80851091460008 0.601793029687043
16.3631843589246 7.55319179588447 0.633849775074574
16.3834079746157 8.24468118564854 0.662228728895168
16.4036315903068 7.39361732132353 0.62711843622367
16.4238552059978 8.03191521956729 0.653627990751228
16.4440788216889 7.07446837220165 0.613434205461912
16.46430243738 7.2872343382829 0.622590446048853
16.484526053071 9.14893654149386 0.697599871320769
16.5047496687621 7.60638328740478 0.636077724914372
16.5249732844532 8.19148969412823 0.660089050510576
16.5451969001442 8.8829790838923 0.687385558923066
16.5654205158353 7.12765986372196 0.615736030455294
16.5856441315264 6.27659599939695 0.5778074963847
16.6058677472174 7.12765986372196 0.615736030455294
16.6260913629085 6.64893644003915 0.594698954320119
16.6463149785995 7.23404284676259 0.620314056540036
16.6665385942906 7.92553223652666 0.64928489952653
16.6867622099817 7.76595776196572 0.64271523744401
16.7069858256727 8.24468118564854 0.662228728895168
16.7272094413638 7.18085135524228 0.618029282454318
16.7474330570549 8.03191521956729 0.653627990751228
16.7676566727459 6.96808538916102 0.608804447167049
16.787880288437 7.39361732132353 0.62711843622367
16.8081039041281 8.40425566020948 0.668606680855476
16.8283275198191 8.82978759237199 0.685324428169477
16.8485511355102 7.12765986372196 0.615736030455294
16.8687747512013 7.81914925348604 0.64491256090486
16.8889983668923 8.45744715172979 0.670719187480671
16.9092219825834 8.03191521956729 0.653627990751228
16.9294455982745 6.43617047395789 0.585106406723445
16.9496692139655 7.92553223652666 0.64928489952653
16.9698928296566 8.72340460933136 0.681183457157842
16.9901164453477 9.52127698213606 0.711653654425974
17.0103400610387 9.36170250757512 0.705664877648999
17.0305636767298 9.25531952453449 0.701643962424722
17.0507872924209 6.64893644003915 0.594698954320119
17.0710109081119 8.82978759237199 0.685324428169477
17.091234523803 10.0000004058189 0.729324987086856
17.1114581394941 8.0851067110876 0.655788750333248
17.1316817551851 7.34042582980322 0.624858542617019
17.1519053708762 8.19148969412823 0.660089050510576
17.1721289865673 8.0851067110876 0.655788750333248
17.1923526022583 7.23404284676259 0.620314056540036
17.2125762179494 7.39361732132353 0.62711843622367
17.2327998336405 8.0851067110876 0.655788750333248
17.2530234493315 7.87234074500635 0.647102423100873
17.2732470650226 7.12765986372196 0.615736030455294
17.2934706807137 8.93617057541261 0.68944052780942
17.3136942964047 7.23404284676259 0.620314056540036
17.3339179120958 8.56383013477042 0.674924364647657
17.3541415277869 7.97872372804697 0.651460064411727
17.3743651434779 8.51063864325011 0.672825061382888
17.394588759169 7.44680881284384 0.629370215232479
17.41481237486 7.07446837220165 0.613434205461912
17.4350359905511 8.72340460933136 0.681183457157842
17.4552596062422 7.07446837220165 0.613434205461912
17.4754832219332 7.97872372804697 0.651460064411727
17.4957068376243 7.92553223652666 0.64928489952653
17.5159304533154 8.61702162629073 0.677017158397923
17.5361540690064 8.24468118564854 0.662228728895168
17.5563776846975 6.32978749091727 0.580250667943183
17.5766013003886 7.87234074500635 0.647102423100873
17.5968249160796 8.51063864325011 0.672825061382888
17.6170485317707 8.8829790838923 0.687385558923066
17.6372721474618 7.02127688068134 0.611123710602471
17.6574957631528 7.81914925348604 0.64491256090486
17.6777193788439 8.13829820260791 0.657942413767192
17.697942994535 7.6595747789251 0.638297898243758
17.718166610226 7.81914925348604 0.64491256090486
17.7383902259171 8.03191521956729 0.653627990751228
17.7586138416082 7.07446837220165 0.613434205461912
17.7788374572992 7.50000030436416 0.631613966431975
17.7990610729903 9.680851456697 0.717592452697427
17.8192846886814 7.44680881284384 0.629370215232479
17.8395083043724 7.76595776196572 0.64271523744401
17.8597319200635 7.18085135524228 0.618029282454318
17.8799555357546 8.24468118564854 0.662228728895168
17.9001791514456 8.45744715172979 0.670719187480671
17.9204027671367 8.03191521956729 0.653627990751228
17.9406263828278 8.40425566020948 0.668606680855476
17.9608499985188 9.52127698213606 0.711653654425974
17.9810736142099 7.44680881284384 0.629370215232479
18.001297229901 7.81914925348604 0.64491256090486
18.021520845592 8.0851067110876 0.655788750333248
18.0417444612831 8.45744715172979 0.670719187480671
18.0619680769742 10.2127663719001 0.737042926748412
18.0821916926652 8.77659610085167 0.683257079784517
18.1024153083563 9.14893654149386 0.697599871320769
18.1226389240474 7.71276627044541 0.640510375928879
18.1428625397384 6.32978749091727 0.580250667943183
18.1630861554295 8.24468118564854 0.662228728895168
18.1833097711205 8.35106416868917 0.666487478437833
18.2035333868116 9.09574504997355 0.695569008579737
18.2237570025027 8.40425566020948 0.668606680855476
18.2439806181937 8.0851067110876 0.655788750333248
18.2642042338848 8.29787267716885 0.664361516152362
18.2844278495759 8.13829820260791 0.657942413767192
18.3046514652669 8.98936206693292 0.691489389764071
18.324875080958 7.60638328740478 0.636077724914372
18.3450986966491 8.72340460933136 0.681183457157842
18.3653223123401 9.04255355845324 0.693532198911084
18.3855459280312 8.77659610085167 0.683257079784517
18.4057695437223 9.25531952453449 0.701643962424722
18.4259931594133 8.98936206693292 0.691489389764071
18.4462167751044 7.97872372804697 0.651460064411727
18.4664403907955 9.62765996517668 0.715618329417402
18.4866640064865 9.36170250757512 0.705664877648999
18.5068876221776 7.81914925348604 0.64491256090486
18.5271112378687 7.55319179588447 0.633849775074574
18.5473348535597 7.87234074500635 0.647102423100873
18.5675584692508 9.09574504997355 0.695569008579737
18.5877820849419 7.6595747789251 0.638297898243758
18.6080057006329 8.13829820260791 0.657942413767192
18.628229316324 7.76595776196572 0.64271523744401
18.6484529320151 8.40425566020948 0.668606680855476
18.6686765477061 7.2872343382829 0.622590446048853
18.6889001633972 7.6595747789251 0.638297898243758
18.7091237790883 7.81914925348604 0.64491256090486
18.7293473947793 8.24468118564854 0.662228728895168
18.7495710104704 8.40425566020948 0.668606680855476
18.7697946261615 7.81914925348604 0.64491256090486
18.7900182418525 8.35106416868917 0.666487478437833
18.8102418575436 7.55319179588447 0.633849775074574
18.8304654732347 8.24468118564854 0.662228728895168
18.8506890889257 8.82978759237199 0.685324428169477
18.8709127046168 8.40425566020948 0.668606680855476
18.8911363203079 8.19148969412823 0.660089050510576
18.9113599359989 6.27659599939695 0.5778074963847
18.93158355169 7.50000030436416 0.631613966431975
18.951807167381 7.55319179588447 0.633849775074574
18.9720307830721 8.72340460933136 0.681183457157842
18.9922543987632 8.13829820260791 0.657942413767192
19.0124780144542 8.13829820260791 0.657942413767192
19.0327016301453 8.13829820260791 0.657942413767192
19.0529252458364 7.2872343382829 0.622590446048853
19.0731488615274 8.35106416868917 0.666487478437833
19.0933724772185 7.87234074500635 0.647102423100873
19.1135960929096 8.29787267716885 0.664361516152362
19.1338197086006 8.29787267716885 0.664361516152362
19.1540433242917 6.48936196547821 0.587519226884514
19.1742669399828 7.44680881284384 0.629370215232479
19.1944905556738 8.77659610085167 0.683257079784517
19.2147141713649 8.56383013477042 0.674924364647657
19.234937787056 6.75531942307977 0.599437666325494
19.255161402747 7.81914925348604 0.64491256090486
19.2753850184381 8.19148969412823 0.660089050510576
19.2956086341292 8.29787267716885 0.664361516152362
19.3158322498202 7.71276627044541 0.640510375928879
19.3360558655113 7.60638328740478 0.636077724914372
19.3562794812024 7.50000030436416 0.631613966431975
19.3765030968934 8.13829820260791 0.657942413767192
19.3967267125845 7.39361732132353 0.62711843622367
19.4169503282756 8.03191521956729 0.653627990751228
19.4371739439666 7.34042582980322 0.624858542617019
19.4573975596577 8.13829820260791 0.657942413767192
19.4776211753488 8.40425566020948 0.668606680855476
19.4978447910398 8.29787267716885 0.664361516152362
19.5180684067309 7.07446837220165 0.613434205461912
19.538292022422 7.39361732132353 0.62711843622367
19.558515638113 7.81914925348604 0.64491256090486
19.5787392538041 8.45744715172979 0.670719187480671
19.5989628694952 7.12765986372196 0.615736030455294
19.6191864851862 7.97872372804697 0.651460064411727
19.6394101008773 7.18085135524228 0.618029282454318
19.6596337165684 7.07446837220165 0.613434205461912
19.6798573322594 8.51063864325011 0.672825061382888
19.7000809479505 7.39361732132353 0.62711843622367
19.7203045636415 7.07446837220165 0.613434205461912
19.7405281793326 7.71276627044541 0.640510375928879
19.7607517950237 7.81914925348604 0.64491256090486
19.7809754107147 7.97872372804697 0.651460064411727
19.8011990264058 8.8829790838923 0.687385558923066
19.8214226420969 8.13829820260791 0.657942413767192
19.8416462577879 7.07446837220165 0.613434205461912
19.861869873479 7.71276627044541 0.640510375928879
19.8820934891701 7.50000030436416 0.631613966431975
19.9023171048611 7.50000030436416 0.631613966431975
19.9225407205522 8.40425566020948 0.668606680855476
19.9427643362433 8.03191521956729 0.653627990751228
19.9629879519343 9.41489399909543 0.707666767848775
19.9832115676254 7.18085135524228 0.618029282454318
20.0034351833165 7.18085135524228 0.618029282454318
20.0236587990075 7.6595747789251 0.638297898243758
20.0438824146986 6.59574494851883 0.59231538178515
20.0641060303897 6.96808538916102 0.608804447167049
20.0843296460807 7.92553223652666 0.64928489952653
20.1045532617718 7.23404284676259 0.620314056540036
20.1247768774629 8.03191521956729 0.653627990751228
20.1450004931539 8.0851067110876 0.655788750333248
20.165224108845 7.44680881284384 0.629370215232479
20.1854477245361 7.02127688068134 0.611123710602471
20.2056713402271 7.6595747789251 0.638297898243758
20.2258949559182 8.67021311781104 0.679103502814817
20.2461185716093 7.55319179588447 0.633849775074574
20.2663421873003 7.55319179588447 0.633849775074574
20.2865658029914 7.97872372804697 0.651460064411727
20.3067894186825 7.44680881284384 0.629370215232479
20.3270130343735 7.71276627044541 0.640510375928879
20.3472366500646 8.45744715172979 0.670719187480671
20.3674602657557 10.1063833888595 0.73319411231239
20.3876838814467 8.77659610085167 0.683257079784517
20.4079074971378 7.92553223652666 0.64928489952653
20.4281311128289 8.0851067110876 0.655788750333248
20.4483547285199 8.03191521956729 0.653627990751228
20.468578344211 7.12765986372196 0.615736030455294
20.488801959902 7.50000030436416 0.631613966431975
20.5090255755931 7.34042582980322 0.624858542617019
20.5292491912842 9.14893654149386 0.697599871320769
20.5494728069752 8.19148969412823 0.660089050510576
20.5696964226663 6.96808538916102 0.608804447167049
20.5899200383574 7.92553223652666 0.64928489952653
20.6101436540484 6.70212793155946 0.59707301148151
20.6303672697395 7.76595776196572 0.64271523744401
20.6505908854306 7.44680881284384 0.629370215232479
20.6708145011216 8.13829820260791 0.657942413767192
20.6910381168127 8.72340460933136 0.681183457157842
20.7112617325038 7.23404284676259 0.620314056540036
20.7314853481948 7.50000030436416 0.631613966431975
20.7517089638859 7.92553223652666 0.64928489952653
20.771932579577 8.56383013477042 0.674924364647657
20.792156195268 7.2872343382829 0.622590446048853
20.8123798109591 7.02127688068134 0.611123710602471
20.8326034266502 7.2872343382829 0.622590446048853
20.8528270423412 7.6595747789251 0.638297898243758
20.8730506580323 7.34042582980322 0.624858542617019
20.8932742737234 7.6595747789251 0.638297898243758
20.9134978894144 8.24468118564854 0.662228728895168
20.9337215051055 7.97872372804697 0.651460064411727
20.9539451207966 7.81914925348604 0.64491256090486
20.9741687364876 7.55319179588447 0.633849775074574
20.9943923521787 6.91489389764071 0.606476314558303
21.0146159678698 8.0851067110876 0.655788750333248
21.0348395835608 8.29787267716885 0.664361516152362
21.0550631992519 7.87234074500635 0.647102423100873
21.075286814943 9.3085110160548 0.703657292136748
21.095510430634 9.14893654149386 0.697599871320769
21.1157340463251 7.12765986372196 0.615736030455294
21.1359576620162 7.87234074500635 0.647102423100873
21.1561812777072 7.55319179588447 0.633849775074574
21.1764048933983 8.29787267716885 0.664361516152362
21.1966285090894 8.0851067110876 0.655788750333248
21.2168521247804 6.48936196547821 0.587519226884514
21.2370757404715 8.51063864325011 0.672825061382888
21.2572993561625 8.13829820260791 0.657942413767192
21.2775229718536 6.70212793155946 0.59707301148151
21.2977465875447 6.8617024061204 0.604139210240542
21.3179702032357 8.13829820260791 0.657942413767192
21.3381938189268 9.04255355845324 0.693532198911084
21.3584174346179 7.76595776196572 0.64271523744401
21.3786410503089 8.0851067110876 0.655788750333248
21.398864666 8.0851067110876 0.655788750333248
21.4190882816911 7.87234074500635 0.647102423100873
21.4393118973821 8.61702162629073 0.677017158397923
21.4595355130732 8.03191521956729 0.653627990751228
21.4797591287643 7.18085135524228 0.618029282454318
21.4999827444553 9.25531952453449 0.701643962424722
21.5202063601464 8.56383013477042 0.674924364647657
21.5404299758375 9.14893654149386 0.697599871320769
21.5606535915285 7.6595747789251 0.638297898243758
21.5808772072196 7.97872372804697 0.651460064411727
21.6011008229107 7.6595747789251 0.638297898243758
21.6213244386017 8.40425566020948 0.668606680855476
21.6415480542928 7.55319179588447 0.633849775074574
21.6617716699839 8.45744715172979 0.670719187480671
21.6819952856749 7.44680881284384 0.629370215232479
21.702218901366 8.29787267716885 0.664361516152362
21.7224425170571 7.55319179588447 0.633849775074574
21.7426661327481 7.02127688068134 0.611123710602471
21.7628897484392 8.0851067110876 0.655788750333248
21.7831133641303 7.55319179588447 0.633849775074574
21.8033369798213 8.13829820260791 0.657942413767192
21.8235605955124 8.03191521956729 0.653627990751228
21.8437842112035 7.39361732132353 0.62711843622367
21.8640078268945 7.97872372804697 0.651460064411727
21.8842314425856 7.23404284676259 0.620314056540036
21.9044550582767 7.6595747789251 0.638297898243758
21.9246786739677 8.19148969412823 0.660089050510576
21.9449022896588 6.75531942307977 0.599437666325494
21.9651259053499 7.34042582980322 0.624858542617019
21.9853495210409 8.45744715172979 0.670719187480671
22.005573136732 7.02127688068134 0.611123710602471
22.025796752423 7.6595747789251 0.638297898243758
22.0460203681141 7.97872372804697 0.651460064411727
22.0662439838052 8.03191521956729 0.653627990751228
22.0864675994962 8.77659610085167 0.683257079784517
22.1066912151873 7.02127688068134 0.611123710602471
22.1269148308784 7.60638328740478 0.636077724914372
22.1471384465694 6.8617024061204 0.604139210240542
22.1673620622605 7.76595776196572 0.64271523744401
22.1875856779516 8.45744715172979 0.670719187480671
22.2078092936426 8.67021311781104 0.679103502814817
22.2280329093337 8.0851067110876 0.655788750333248
22.2482565250248 7.02127688068134 0.611123710602471
22.2684801407158 7.55319179588447 0.633849775074574
22.2887037564069 8.19148969412823 0.660089050510576
22.308927372098 7.81914925348604 0.64491256090486
22.329150987789 8.35106416868917 0.666487478437833
22.3493746034801 8.29787267716885 0.664361516152362
22.3695982191712 7.34042582980322 0.624858542617019
22.3898218348622 8.0851067110876 0.655788750333248
22.4100454505533 8.35106416868917 0.666487478437833
22.4302690662444 8.03191521956729 0.653627990751228
22.4504926819354 8.03191521956729 0.653627990751228
22.4707162976265 6.54255345699852 0.5899221785364
22.4909399133176 7.92553223652666 0.64928489952653
22.5111635290086 8.45744715172979 0.670719187480671
22.5313871446997 8.24468118564854 0.662228728895168
22.5516107603908 6.59574494851883 0.59231538178515
22.5718343760818 7.97872372804697 0.651460064411727
22.5920579917729 7.87234074500635 0.647102423100873
22.612281607464 7.92553223652666 0.64928489952653
22.632505223155 7.39361732132353 0.62711843622367
22.6527288388461 7.50000030436416 0.631613966431975
22.6729524545372 6.80851091460008 0.601793029687043
22.6931760702282 7.6595747789251 0.638297898243758
22.7133996859193 7.44680881284384 0.629370215232479
22.7336233016104 6.91489389764071 0.606476314558303
22.7538469173014 7.2872343382829 0.622590446048853
22.7740705329925 7.07446837220165 0.613434205461912
22.7942941486835 8.40425566020948 0.668606680855476
22.8145177643746 6.75531942307977 0.599437666325494
22.8347413800657 7.07446837220165 0.613434205461912
22.8549649957567 7.76595776196572 0.64271523744401
22.8751886114478 8.56383013477042 0.674924364647657
22.8954122271389 7.55319179588447 0.633849775074574
22.9156358428299 6.8617024061204 0.604139210240542
22.935859458521 7.55319179588447 0.633849775074574
22.9560830742121 8.03191521956729 0.653627990751228
22.9763066899031 7.23404284676259 0.620314056540036
22.9965303055942 8.29787267716885 0.664361516152362
23.0167539212853 7.6595747789251 0.638297898243758
23.0369775369763 8.45744715172979 0.670719187480671
23.0572011526674 6.43617047395789 0.585106406723445
23.0774247683585 7.92553223652666 0.64928489952653
23.0976483840495 6.80851091460008 0.601793029687043
23.1178719997406 6.27659599939695 0.5778074963847
23.1380956154317 6.75531942307977 0.599437666325494
23.1583192311227 7.71276627044541 0.640510375928879
23.1785428468138 8.93617057541261 0.68944052780942
23.1987664625049 7.55319179588447 0.633849775074574
23.2189900781959 7.39361732132353 0.62711843622367
23.239213693887 7.23404284676259 0.620314056540036
23.2594373095781 7.6595747789251 0.638297898243758
23.2796609252691 8.03191521956729 0.653627990751228
23.2998845409602 8.40425566020948 0.668606680855476
23.3201081566513 8.82978759237199 0.685324428169477
23.3403317723423 8.0851067110876 0.655788750333248
23.3605553880334 8.03191521956729 0.653627990751228
23.3807790037245 8.82978759237199 0.685324428169477
23.4010026194155 7.2872343382829 0.622590446048853
23.4212262351066 7.23404284676259 0.620314056540036
23.4414498507977 7.2872343382829 0.622590446048853
23.4616734664887 7.39361732132353 0.62711843622367
23.4818970821798 7.87234074500635 0.647102423100873
23.5021206978709 6.96808538916102 0.608804447167049
23.5223443135619 7.34042582980322 0.624858542617019
23.542567929253 6.96808538916102 0.608804447167049
23.562791544944 7.87234074500635 0.647102423100873
23.5830151606351 7.23404284676259 0.620314056540036
23.6032387763262 7.60638328740478 0.636077724914372
23.6234623920172 8.03191521956729 0.653627990751228
23.6436860077083 8.0851067110876 0.655788750333248
23.6639096233994 7.87234074500635 0.647102423100873
23.6841332390904 8.0851067110876 0.655788750333248
23.7043568547815 8.35106416868917 0.666487478437833
23.7245804704726 7.44680881284384 0.629370215232479
23.7448040861636 8.13829820260791 0.657942413767192
23.7650277018547 6.43617047395789 0.585106406723445
23.7852513175458 8.56383013477042 0.674924364647657
23.8054749332368 7.2872343382829 0.622590446048853
23.8256985489279 8.29787267716885 0.664361516152362
23.845922164619 6.22340450787664 0.575353950284691
23.86614578031 7.18085135524228 0.618029282454318
23.8863693960011 7.97872372804697 0.651460064411727
23.9065930116922 6.32978749091727 0.580250667943183
23.9268166273832 8.51063864325011 0.672825061382888
23.9470402430743 7.76595776196572 0.64271523744401
23.9672638587654 9.04255355845324 0.693532198911084
23.9874874744564 7.76595776196572 0.64271523744401
24.0077110901475 7.97872372804697 0.651460064411727
24.0279347058386 7.44680881284384 0.629370215232479
24.0481583215296 7.23404284676259 0.620314056540036
24.0683819372207 7.2872343382829 0.622590446048853
24.0886055529118 8.45744715172979 0.670719187480671
24.1088291686028 7.02127688068134 0.611123710602471
24.1290527842939 8.03191521956729 0.653627990751228
24.149276399985 7.92553223652666 0.64928489952653
24.169500015676 7.92553223652666 0.64928489952653
24.1897236313671 6.96808538916102 0.608804447167049
24.2099472470582 6.64893644003915 0.594698954320119
24.2301708627492 6.75531942307977 0.599437666325494
24.2503944784403 7.92553223652666 0.64928489952653
24.2706180941314 8.0851067110876 0.655788750333248
24.2908417098224 7.81914925348604 0.64491256090486
24.3110653255135 7.23404284676259 0.620314056540036
24.3312889412045 7.34042582980322 0.624858542617019
24.3515125568956 8.24468118564854 0.662228728895168
24.3717361725867 8.29787267716885 0.664361516152362
24.3919597882777 8.35106416868917 0.666487478437833
24.4121834039688 8.24468118564854 0.662228728895168
24.4324070196599 9.04255355845324 0.693532198911084
24.4526306353509 8.13829820260791 0.657942413767192
24.472854251042 7.76595776196572 0.64271523744401
24.4930778667331 7.44680881284384 0.629370215232479
24.5133014824241 8.0851067110876 0.655788750333248
24.5335250981152 9.36170250757512 0.705664877648999
24.5537487138063 7.76595776196572 0.64271523744401
24.5739723294973 8.51063864325011 0.672825061382888
24.5941959451884 6.59574494851883 0.59231538178515
24.6144195608795 8.0851067110876 0.655788750333248
24.6346431765705 8.67021311781104 0.679103502814817
24.6548667922616 6.80851091460008 0.601793029687043
24.6750904079527 7.34042582980322 0.624858542617019
24.6953140236437 8.61702162629073 0.677017158397923
24.7155376393348 7.87234074500635 0.647102423100873
24.7357612550259 8.67021311781104 0.679103502814817
24.7559848707169 8.19148969412823 0.660089050510576
24.776208486408 7.55319179588447 0.633849775074574
24.7964321020991 8.24468118564854 0.662228728895168
24.8166557177901 7.76595776196572 0.64271523744401
24.8368793334812 8.56383013477042 0.674924364647657
24.8571029491723 8.29787267716885 0.664361516152362
24.8773265648633 7.18085135524228 0.618029282454318
24.8975501805544 7.12765986372196 0.615736030455294
24.9177737962455 8.51063864325011 0.672825061382888
24.9379974119365 8.13829820260791 0.657942413767192
24.9582210276276 7.34042582980322 0.624858542617019
24.9784446433187 7.6595747789251 0.638297898243758
24.9986682590097 7.81914925348604 0.64491256090486
25.0188918747008 8.29787267716885 0.664361516152362
25.0391154903919 7.12765986372196 0.615736030455294
25.0593391060829 6.8617024061204 0.604139210240542
25.079562721774 7.18085135524228 0.618029282454318
25.099786337465 6.54255345699852 0.5899221785364
25.1200099531561 6.96808538916102 0.608804447167049
25.1402335688472 8.35106416868917 0.666487478437833
25.1604571845382 7.97872372804697 0.651460064411727
25.1806808002293 6.80851091460008 0.601793029687043
25.2009044159204 8.35106416868917 0.666487478437833
25.2211280316114 8.8829790838923 0.687385558923066
25.2413516473025 7.02127688068134 0.611123710602471
25.2615752629936 6.70212793155946 0.59707301148151
25.2817988786846 7.39361732132353 0.62711843622367
25.3020224943757 7.60638328740478 0.636077724914372
25.3222461100668 8.29787267716885 0.664361516152362
25.3424697257578 7.71276627044541 0.640510375928879
25.3626933414489 9.25531952453449 0.701643962424722
25.38291695714 7.6595747789251 0.638297898243758
25.403140572831 7.60638328740478 0.636077724914372
25.4233641885221 7.07446837220165 0.613434205461912
25.4435878042132 7.07446837220165 0.613434205461912
25.4638114199042 7.02127688068134 0.611123710602471
25.4840350355953 8.19148969412823 0.660089050510576
25.5042586512864 7.60638328740478 0.636077724914372
25.5244822669774 6.59574494851883 0.59231538178515
25.5447058826685 7.6595747789251 0.638297898243758
25.5649294983596 7.60638328740478 0.636077724914372
25.5851531140506 7.76595776196572 0.64271523744401
25.6053767297417 8.67021311781104 0.679103502814817
25.6256003454328 7.87234074500635 0.647102423100873
25.6458239611238 7.2872343382829 0.622590446048853
25.6660475768149 7.92553223652666 0.64928489952653
25.686271192506 8.93617057541261 0.68944052780942
25.706494808197 8.0851067110876 0.655788750333248
25.7267184238881 7.2872343382829 0.622590446048853
25.7469420395792 9.14893654149386 0.697599871320769
25.7671656552702 7.2872343382829 0.622590446048853
25.7873892709613 7.76595776196572 0.64271523744401
25.8076128866524 8.29787267716885 0.664361516152362
25.8278365023434 8.51063864325011 0.672825061382888
25.8480601180345 8.29787267716885 0.664361516152362
25.8682837337255 7.92553223652666 0.64928489952653
25.8885073494166 8.61702162629073 0.677017158397923
25.9087309651077 7.92553223652666 0.64928489952653
25.9289545807987 7.23404284676259 0.620314056540036
25.9491781964898 7.18085135524228 0.618029282454318
25.9694018121809 8.51063864325011 0.672825061382888
25.9896254278719 8.77659610085167 0.683257079784517
26.009849043563 7.2872343382829 0.622590446048853
26.0300726592541 7.55319179588447 0.633849775074574
26.0502962749451 6.75531942307977 0.599437666325494
26.0705198906362 8.56383013477042 0.674924364647657
26.0907435063273 8.13829820260791 0.657942413767192
26.1109671220183 7.97872372804697 0.651460064411727
26.1311907377094 8.45744715172979 0.670719187480671
26.1514143534005 7.50000030436416 0.631613966431975
26.1716379690915 8.13829820260791 0.657942413767192
26.1918615847826 7.12765986372196 0.615736030455294
26.2120852004737 8.82978759237199 0.685324428169477
26.2323088161647 8.24468118564854 0.662228728895168
26.2525324318558 8.56383013477042 0.674924364647657
26.2727560475469 7.97872372804697 0.651460064411727
26.2929796632379 8.0851067110876 0.655788750333248
26.313203278929 5.85106406723445 0.55787706953872
26.3334268946201 7.39361732132353 0.62711843622367
26.3536505103111 7.07446837220165 0.613434205461912
26.3738741260022 7.50000030436416 0.631613966431975
26.3940977416933 8.82978759237199 0.685324428169477
26.4143213573843 7.76595776196572 0.64271523744401
26.4345449730754 8.19148969412823 0.660089050510576
26.4547685887665 7.44680881284384 0.629370215232479
26.4749922044575 7.97872372804697 0.651460064411727
26.4952158201486 8.45744715172979 0.670719187480671
26.5154394358397 7.60638328740478 0.636077724914372
26.5356630515307 7.39361732132353 0.62711843622367
26.5558866672218 7.23404284676259 0.620314056540036
26.5761102829129 7.92553223652666 0.64928489952653
26.5963338986039 8.0851067110876 0.655788750333248
26.616557514295 8.61702162629073 0.677017158397923
26.636781129986 9.14893654149386 0.697599871320769
26.6570047456771 7.60638328740478 0.636077724914372
26.6772283613682 8.03191521956729 0.653627990751228
26.6974519770592 6.75531942307977 0.599437666325494
26.7176755927503 7.07446837220165 0.613434205461912
26.7378992084414 8.03191521956729 0.653627990751228
26.7581228241324 7.97872372804697 0.651460064411727
26.7783464398235 7.92553223652666 0.64928489952653
26.7985700555146 8.35106416868917 0.666487478437833
26.8187936712056 8.29787267716885 0.664361516152362
26.8390172868967 7.76595776196572 0.64271523744401
26.8592409025878 8.93617057541261 0.68944052780942
26.8794645182788 8.29787267716885 0.664361516152362
26.8996881339699 7.87234074500635 0.647102423100873
26.919911749661 8.0851067110876 0.655788750333248
26.940135365352 7.23404284676259 0.620314056540036
26.9603589810431 7.55319179588447 0.633849775074574
26.9805825967342 7.81914925348604 0.64491256090486
27.0008062124252 7.55319179588447 0.633849775074574
27.0210298281163 8.35106416868917 0.666487478437833
27.0412534438074 6.91489389764071 0.606476314558303
27.0614770594984 7.92553223652666 0.64928489952653
27.0817006751895 8.19148969412823 0.660089050510576
27.1019242908806 9.14893654149386 0.697599871320769
27.1221479065716 7.81914925348604 0.64491256090486
27.1423715222627 7.55319179588447 0.633849775074574
27.1625951379538 7.81914925348604 0.64491256090486
27.1828187536448 8.24468118564854 0.662228728895168
27.2030423693359 8.40425566020948 0.668606680855476
27.223265985027 6.48936196547821 0.587519226884514
27.243489600718 8.82978759237199 0.685324428169477
27.2637132164091 8.24468118564854 0.662228728895168
27.2839368321002 8.35106416868917 0.666487478437833
27.3041604477912 7.2872343382829 0.622590446048853
27.3243840634823 8.72340460933136 0.681183457157842
27.3446076791734 7.44680881284384 0.629370215232479
27.3648312948644 8.40425566020948 0.668606680855476
27.3850549105555 6.96808538916102 0.608804447167049
27.4052785262465 8.67021311781104 0.679103502814817
27.4255021419376 8.40425566020948 0.668606680855476
27.4457257576287 6.75531942307977 0.599437666325494
27.4659493733197 8.61702162629073 0.677017158397923
27.4861729890108 8.51063864325011 0.672825061382888
27.5063966047019 8.35106416868917 0.666487478437833
27.5266202203929 7.81914925348604 0.64491256090486
27.546843836084 8.82978759237199 0.685324428169477
27.5670674517751 6.48936196547821 0.587519226884514
27.5872910674661 8.67021311781104 0.679103502814817
27.6075146831572 7.18085135524228 0.618029282454318
27.6277382988483 8.82978759237199 0.685324428169477
27.6479619145393 8.67021311781104 0.679103502814817
27.6681855302304 8.67021311781104 0.679103502814817
27.6884091459215 7.50000030436416 0.631613966431975
27.7086327616125 8.51063864325011 0.672825061382888
27.7288563773036 7.50000030436416 0.631613966431975
27.7490799929947 6.96808538916102 0.608804447167049
27.7693036086857 7.81914925348604 0.64491256090486
27.7895272243768 7.81914925348604 0.64491256090486
27.8097508400679 7.2872343382829 0.622590446048853
27.8299744557589 7.81914925348604 0.64491256090486
27.85019807145 8.13829820260791 0.657942413767192
27.8704216871411 7.18085135524228 0.618029282454318
27.8906453028321 7.60638328740478 0.636077724914372
27.9108689185232 8.67021311781104 0.679103502814817
27.9310925342143 7.81914925348604 0.64491256090486
27.9513161499053 7.76595776196572 0.64271523744401
27.9715397655964 7.76595776196572 0.64271523744401
27.9917633812875 7.50000030436416 0.631613966431975
28.0119869969785 7.71276627044541 0.640510375928879
28.0322106126696 7.71276627044541 0.640510375928879
28.0524342283607 8.61702162629073 0.677017158397923
28.0726578440517 8.72340460933136 0.681183457157842
28.0928814597428 7.92553223652666 0.64928489952653
28.1131050754339 8.61702162629073 0.677017158397923
28.1333286911249 6.64893644003915 0.594698954320119
28.153552306816 7.2872343382829 0.622590446048853
28.173775922507 8.13829820260791 0.657942413767192
28.1939995381981 6.75531942307977 0.599437666325494
28.2142231538892 9.25531952453449 0.701643962424722
28.2344467695802 5.95744705027507 0.562925833709398
28.2546703852713 6.43617047395789 0.585106406723445
28.2748940009624 7.76595776196572 0.64271523744401
28.2951176166534 8.45744715172979 0.670719187480671
28.3153412323445 7.76595776196572 0.64271523744401
28.3355648480356 9.3085110160548 0.703657292136748
28.3557884637266 7.97872372804697 0.651460064411727
28.3760120794177 7.50000030436416 0.631613966431975
28.3962356951088 7.55319179588447 0.633849775074574
28.4164593107998 6.91489389764071 0.606476314558303
28.4366829264909 6.8617024061204 0.604139210240542
28.456906542182 8.19148969412823 0.660089050510576
28.477130157873 6.80851091460008 0.601793029687043
28.4973537735641 9.25531952453449 0.701643962424722
28.5175773892552 8.56383013477042 0.674924364647657
28.5378010049462 7.23404284676259 0.620314056540036
28.5580246206373 8.61702162629073 0.677017158397923
28.5782482363284 7.71276627044541 0.640510375928879
28.5984718520194 6.91489389764071 0.606476314558303
28.6186954677105 6.96808538916102 0.608804447167049
28.6389190834016 8.03191521956729 0.653627990751228
28.6591426990926 7.18085135524228 0.618029282454318
28.6793663147837 8.82978759237199 0.685324428169477
28.6995899304748 8.40425566020948 0.668606680855476
28.7198135461658 6.75531942307977 0.599437666325494
28.7400371618569 8.40425566020948 0.668606680855476
28.760260777548 7.92553223652666 0.64928489952653
28.780484393239 8.24468118564854 0.662228728895168
28.8007080089301 8.51063864325011 0.672825061382888
28.8209316246212 8.19148969412823 0.660089050510576
28.8411552403122 7.55319179588447 0.633849775074574
28.8613788560033 8.0851067110876 0.655788750333248
28.8816024716944 7.76595776196572 0.64271523744401
28.9018260873854 7.92553223652666 0.64928489952653
28.9220497030765 7.87234074500635 0.647102423100873
28.9422733187675 7.50000030436416 0.631613966431975
28.9624969344586 8.72340460933136 0.681183457157842
28.9827205501497 8.61702162629073 0.677017158397923
29.0029441658407 8.13829820260791 0.657942413767192
29.0231677815318 8.61702162629073 0.677017158397923
29.0433913972229 6.91489389764071 0.606476314558303
29.0636150129139 7.55319179588447 0.633849775074574
29.083838628605 8.03191521956729 0.653627990751228
29.1040622442961 8.51063864325011 0.672825061382888
29.1242858599871 8.56383013477042 0.674924364647657
29.1445094756782 8.03191521956729 0.653627990751228
29.1647330913693 8.72340460933136 0.681183457157842
29.1849567070603 7.44680881284384 0.629370215232479
29.2051803227514 8.56383013477042 0.674924364647657
29.2254039384425 7.6595747789251 0.638297898243758
29.2456275541335 7.07446837220165 0.613434205461912
29.2658511698246 7.6595747789251 0.638297898243758
29.2860747855157 7.71276627044541 0.640510375928879
29.3062984012067 8.56383013477042 0.674924364647657
29.3265220168978 7.6595747789251 0.638297898243758
29.3467456325889 7.76595776196572 0.64271523744401
29.3669692482799 7.2872343382829 0.622590446048853
29.387192863971 7.55319179588447 0.633849775074574
29.4074164796621 8.67021311781104 0.679103502814817
29.4276400953531 9.14893654149386 0.697599871320769
29.4478637110442 8.03191521956729 0.653627990751228
29.4680873267353 7.87234074500635 0.647102423100873
29.4883109424263 7.76595776196572 0.64271523744401
29.5085345581174 9.46808549061574 0.709663010933843
29.5287581738085 8.61702162629073 0.677017158397923
29.5489817894995 7.39361732132353 0.62711843622367
29.5692054051906 9.04255355845324 0.693532198911084
29.5894290208817 7.02127688068134 0.611123710602471
29.6096526365727 8.40425566020948 0.668606680855476
29.6298762522638 7.02127688068134 0.611123710602471
29.6500998679549 7.44680881284384 0.629370215232479
29.6703234836459 7.60638328740478 0.636077724914372
29.690547099337 8.29787267716885 0.664361516152362
29.710770715028 9.04255355845324 0.693532198911084
29.7309943307191 7.76595776196572 0.64271523744401
29.7512179464102 8.51063864325011 0.672825061382888
29.7714415621012 8.24468118564854 0.662228728895168
29.7916651777923 8.03191521956729 0.653627990751228
29.8118887934834 7.92553223652666 0.64928489952653
29.8321124091744 7.97872372804697 0.651460064411727
29.8523360248655 7.97872372804697 0.651460064411727
29.8725596405566 7.81914925348604 0.64491256090486
29.8927832562476 8.56383013477042 0.674924364647657
29.9130068719387 10.4255323379814 0.744680881284384
29.9332304876298 10.0000004058189 0.729324987086856
29.9534541033208 8.13829820260791 0.657942413767192
29.9736777190119 8.03191521956729 0.653627990751228
29.993901334703 10.0000004058189 0.729324987086856
30.014124950394 10.6914897955829 0.754119545431137
30.0343485660851 9.36170250757512 0.705664877648999
30.0545721817762 10.2127663719001 0.737042926748412
30.0747957974672 9.84042593125793 0.723482503229191
30.0950194131583 10.5851068125423 0.750358327241694
30.1152430288494 10.3191493549408 0.740871746937468
30.1354666445404 11.7021281344689 0.788957317878617
30.1556902602315 9.57446847365637 0.713638745184143
30.1759138759226 9.3085110160548 0.703657292136748
30.1961374916136 10.3191493549408 0.740871746937468
30.2163611073047 9.36170250757512 0.705664877648999
30.2365847229958 10.1063833888595 0.73319411231239
30.2568083386868 7.92553223652666 0.64928489952653
30.2770319543779 10.531915321022 0.748470630346173
30.297255570069 9.94680891429856 0.727382706708846
30.31747918576 8.8829790838923 0.687385558923066
30.3377028014511 9.46808549061574 0.709663010933843
30.3579264171422 9.3085110160548 0.703657292136748
30.3781500328332 8.56383013477042 0.674924364647657
30.3983736485243 8.56383013477042 0.674924364647657
30.4185972642154 8.72340460933136 0.681183457157842
30.4388208799064 9.04255355845324 0.693532198911084
30.4590444955975 8.93617057541261 0.68944052780942
30.4792681112885 8.29787267716885 0.664361516152362
30.4994917269796 7.71276627044541 0.640510375928879
30.5197153426707 8.72340460933136 0.681183457157842
30.5399389583617 7.18085135524228 0.618029282454318
30.5601625740528 8.13829820260791 0.657942413767192
30.5803861897439 8.45744715172979 0.670719187480671
30.6006098054349 7.87234074500635 0.647102423100873
30.620833421126 9.25531952453449 0.701643962424722
30.6410570368171 9.78723443973762 0.721524495570747
30.6612806525081 8.03191521956729 0.653627990751228
30.6815042681992 9.20212803301418 0.699624838922197
30.7017278838903 8.77659610085167 0.683257079784517
30.7219514995813 8.51063864325011 0.672825061382888
30.7421751152724 8.61702162629073 0.677017158397923
30.7623987309635 7.34042582980322 0.624858542617019
30.7826223466545 7.76595776196572 0.64271523744401
30.8028459623456 7.76595776196572 0.64271523744401
30.8230695780367 9.78723443973762 0.721524495570747
30.8432931937277 8.29787267716885 0.664361516152362
30.8635168094188 7.55319179588447 0.633849775074574
30.8837404251099 7.07446837220165 0.613434205461912
30.9039640408009 7.71276627044541 0.640510375928879
30.924187656492 8.29787267716885 0.664361516152362
30.9444112721831 7.76595776196572 0.64271523744401
30.9646348878741 8.8829790838923 0.687385558923066
30.9848585035652 6.22340450787664 0.575353950284691
31.0050821192563 8.24468118564854 0.662228728895168
31.0253057349473 8.56383013477042 0.674924364647657
31.0455293506384 9.20212803301418 0.699624838922197
31.0657529663295 8.29787267716885 0.664361516152362
31.0859765820205 8.19148969412823 0.660089050510576
31.1062001977116 8.19148969412823 0.660089050510576
31.1264238134027 8.77659610085167 0.683257079784517
31.1466474290937 6.64893644003915 0.594698954320119
31.1668710447848 7.12765986372196 0.615736030455294
31.1870946604759 8.13829820260791 0.657942413767192
31.2073182761669 7.87234074500635 0.647102423100873
31.227541891858 7.97872372804697 0.651460064411727
31.247765507549 7.50000030436416 0.631613966431975
31.2679891232401 8.45744715172979 0.670719187480671
31.2882127389312 8.51063864325011 0.672825061382888
31.3084363546222 8.35106416868917 0.666487478437833
31.3286599703133 8.72340460933136 0.681183457157842
31.3488835860044 6.11702152483601 0.570415198401908
31.3691072016954 7.97872372804697 0.651460064411727
31.3893308173865 8.77659610085167 0.683257079784517
31.4095544330776 7.87234074500635 0.647102423100873
31.4297780487686 7.50000030436416 0.631613966431975
31.4500016644597 8.24468118564854 0.662228728895168
31.4702252801508 7.97872372804697 0.651460064411727
31.4904488958418 8.13829820260791 0.657942413767192
31.5106725115329 8.56383013477042 0.674924364647657
31.530896127224 7.2872343382829 0.622590446048853
31.551119742915 7.50000030436416 0.631613966431975
31.5713433586061 6.91489389764071 0.606476314558303
31.5915669742972 8.93617057541261 0.68944052780942
31.6117905899882 7.60638328740478 0.636077724914372
31.6320142056793 7.50000030436416 0.631613966431975
31.6522378213704 7.07446837220165 0.613434205461912
31.6724614370614 7.2872343382829 0.622590446048853
31.6926850527525 7.18085135524228 0.618029282454318
31.7129086684436 7.34042582980322 0.624858542617019
31.7331322841346 6.38297898243758 0.582683595460406
31.7533558998257 7.81914925348604 0.64491256090486
31.7735795155168 7.6595747789251 0.638297898243758
31.7938031312078 7.23404284676259 0.620314056540036
31.8140267468989 7.12765986372196 0.615736030455294
31.83425036259 7.18085135524228 0.618029282454318
31.854473978281 8.0851067110876 0.655788750333248
31.8746975939721 7.50000030436416 0.631613966431975
31.8949212096632 8.35106416868917 0.666487478437833
31.9151448253542 8.82978759237199 0.685324428169477
31.9353684410453 7.50000030436416 0.631613966431975
31.9555920567364 8.13829820260791 0.657942413767192
31.9758156724274 7.76595776196572 0.64271523744401
31.9960392881185 7.97872372804697 0.651460064411727
32.0162629038095 7.12765986372196 0.615736030455294
32.0364865195006 7.07446837220165 0.613434205461912
32.0567101351917 8.29787267716885 0.664361516152362
32.0769337508827 6.70212793155946 0.59707301148151
32.0971573665738 8.24468118564854 0.662228728895168
32.1173809822649 6.0638300333157 0.567929717304644
32.1376045979559 7.87234074500635 0.647102423100873
32.157828213647 7.97872372804697 0.651460064411727
32.1780518293381 6.96808538916102 0.608804447167049
32.1982754450291 7.81914925348604 0.64491256090486
32.2184990607202 7.23404284676259 0.620314056540036
32.2387226764113 7.07446837220165 0.613434205461912
32.2589462921023 8.13829820260791 0.657942413767192
32.2791699077934 7.92553223652666 0.64928489952653
32.2993935234845 7.34042582980322 0.624858542617019
32.3196171391755 8.03191521956729 0.653627990751228
32.3398407548666 8.72340460933136 0.681183457157842
32.3600643705577 7.23404284676259 0.620314056540036
32.3802879862487 7.60638328740478 0.636077724914372
32.4005116019398 8.24468118564854 0.662228728895168
32.4207352176309 7.60638328740478 0.636077724914372
32.4409588333219 7.39361732132353 0.62711843622367
32.461182449013 7.60638328740478 0.636077724914372
32.4814060647041 7.60638328740478 0.636077724914372
32.5016296803951 8.0851067110876 0.655788750333248
32.5218532960862 6.70212793155946 0.59707301148151
32.5420769117773 8.03191521956729 0.653627990751228
32.5623005274683 7.2872343382829 0.622590446048853
32.5825241431594 7.87234074500635 0.647102423100873
32.6027477588505 7.81914925348604 0.64491256090486
32.6229713745415 7.76595776196572 0.64271523744401
32.6431949902326 8.35106416868917 0.666487478437833
32.6634186059237 7.92553223652666 0.64928489952653
32.6836422216147 7.6595747789251 0.638297898243758
32.7038658373058 7.44680881284384 0.629370215232479
32.7240894529969 8.61702162629073 0.677017158397923
32.7443130686879 7.02127688068134 0.611123710602471
32.764536684379 6.8617024061204 0.604139210240542
32.78476030007 7.23404284676259 0.620314056540036
32.8049839157611 6.80851091460008 0.601793029687043
32.8252075314522 8.03191521956729 0.653627990751228
32.8454311471432 7.34042582980322 0.624858542617019
32.8656547628343 7.07446837220165 0.613434205461912
32.8858783785254 7.76595776196572 0.64271523744401
32.9061019942164 7.50000030436416 0.631613966431975
32.9263256099075 8.19148969412823 0.660089050510576
32.9465492255986 7.60638328740478 0.636077724914372
32.9667728412896 7.60638328740478 0.636077724914372
32.9869964569807 7.50000030436416 0.631613966431975
33.0072200726718 7.71276627044541 0.640510375928879
33.0274436883628 6.8617024061204 0.604139210240542
33.0476673040539 7.2872343382829 0.622590446048853
33.067890919745 7.55319179588447 0.633849775074574
33.088114535436 7.02127688068134 0.611123710602471
33.1083381511271 8.56383013477042 0.674924364647657
33.1285617668182 7.44680881284384 0.629370215232479
33.1487853825092 7.23404284676259 0.620314056540036
33.1690089982003 7.23404284676259 0.620314056540036
33.1892326138914 8.24468118564854 0.662228728895168
33.2094562295824 7.18085135524228 0.618029282454318
33.2296798452735 7.23404284676259 0.620314056540036
33.2499034609646 7.6595747789251 0.638297898243758
33.2701270766556 6.43617047395789 0.585106406723445
33.2903506923467 7.50000030436416 0.631613966431975
33.3105743080378 7.71276627044541 0.640510375928879
33.3307979237288 7.50000030436416 0.631613966431975
33.3510215394199 7.71276627044541 0.640510375928879
33.371245155111 7.12765986372196 0.615736030455294
33.391468770802 7.6595747789251 0.638297898243758
33.4116923864931 8.45744715172979 0.670719187480671
33.4319160021842 7.55319179588447 0.633849775074574
33.4521396178752 6.91489389764071 0.606476314558303
33.4723632335663 7.81914925348604 0.64491256090486
33.4925868492574 7.02127688068134 0.611123710602471
33.5128104649484 7.07446837220165 0.613434205461912
33.5330340806395 6.91489389764071 0.606476314558303
33.5532576963305 8.40425566020948 0.668606680855476
33.5734813120216 8.51063864325011 0.672825061382888
33.5937049277127 6.43617047395789 0.585106406723445
33.6139285434037 8.13829820260791 0.657942413767192
33.6341521590948 7.12765986372196 0.615736030455294
33.6543757747859 7.71276627044541 0.640510375928879
33.6745993904769 7.71276627044541 0.640510375928879
33.694823006168 7.76595776196572 0.64271523744401
33.7150466218591 6.80851091460008 0.601793029687043
33.7352702375501 7.92553223652666 0.64928489952653
33.7554938532412 8.45744715172979 0.670719187480671
33.7757174689323 8.35106416868917 0.666487478437833
33.7959410846233 7.76595776196572 0.64271523744401
33.8161647003144 7.6595747789251 0.638297898243758
33.8363883160055 6.48936196547821 0.587519226884514
33.8566119316965 6.96808538916102 0.608804447167049
33.8768355473876 7.76595776196572 0.64271523744401
33.8970591630787 7.50000030436416 0.631613966431975
33.9172827787697 7.44680881284384 0.629370215232479
33.9375063944608 8.24468118564854 0.662228728895168
33.9577300101519 8.0851067110876 0.655788750333248
33.9779536258429 8.93617057541261 0.68944052780942
33.998177241534 7.23404284676259 0.620314056540036
34.0184008572251 7.71276627044541 0.640510375928879
34.0386244729161 8.72340460933136 0.681183457157842
34.0588480886072 8.03191521956729 0.653627990751228
34.0790717042983 6.91489389764071 0.606476314558303
34.0992953199893 6.96808538916102 0.608804447167049
34.1195189356804 7.81914925348604 0.64491256090486
34.1397425513715 8.29787267716885 0.664361516152362
34.1599661670625 8.56383013477042 0.674924364647657
34.1801897827536 9.20212803301418 0.699624838922197
34.2004133984447 6.01063854179539 0.565433310857768
34.2206370141357 8.13829820260791 0.657942413767192
34.2408606298268 7.97872372804697 0.651460064411727
34.2610842455179 7.2872343382829 0.622590446048853
34.2813078612089 7.97872372804697 0.651460064411727
34.3015314769 8.51063864325011 0.672825061382888
34.321755092591 7.6595747789251 0.638297898243758
34.3419787082821 8.40425566020948 0.668606680855476
34.3622023239732 7.2872343382829 0.622590446048853
34.3824259396642 9.25531952453449 0.701643962424722
34.4026495553553 7.6595747789251 0.638297898243758
34.4228731710464 8.67021311781104 0.679103502814817
34.4430967867374 7.76595776196572 0.64271523744401
34.4633204024285 7.97872372804697 0.651460064411727
34.4835440181196 8.19148969412823 0.660089050510576
34.5037676338106 7.71276627044541 0.640510375928879
34.5239912495017 8.45744715172979 0.670719187480671
34.5442148651928 8.19148969412823 0.660089050510576
34.5644384808838 7.2872343382829 0.622590446048853
34.5846620965749 7.44680881284384 0.629370215232479
34.604885712266 7.81914925348604 0.64491256090486
34.625109327957 7.44680881284384 0.629370215232479
34.6453329436481 7.60638328740478 0.636077724914372
34.6655565593392 8.51063864325011 0.672825061382888
34.6857801750302 8.03191521956729 0.653627990751228
34.7060037907213 8.56383013477042 0.674924364647657
34.7262274064124 7.02127688068134 0.611123710602471
34.7464510221034 7.23404284676259 0.620314056540036
34.7666746377945 8.45744715172979 0.670719187480671
34.7868982534856 9.14893654149386 0.697599871320769
34.8071218691766 8.24468118564854 0.662228728895168
34.8273454848677 8.51063864325011 0.672825061382888
34.8475691005588 8.56383013477042 0.674924364647657
34.8677927162498 8.51063864325011 0.672825061382888
34.8880163319409 9.41489399909543 0.707666767848775
34.908239947632 9.36170250757512 0.705664877648999
34.928463563323 8.45744715172979 0.670719187480671
34.9486871790141 9.36170250757512 0.705664877648999
34.9689107947052 8.67021311781104 0.679103502814817
34.9891344103962 9.52127698213606 0.711653654425974
35.0093580260873 8.51063864325011 0.672825061382888
35.0295816417784 9.680851456697 0.717592452697427
35.0498052574694 9.09574504997355 0.695569008579737
35.0700288731605 8.82978759237199 0.685324428169477
35.0902524888515 8.8829790838923 0.687385558923066
35.1104761045426 8.35106416868917 0.666487478437833
35.1306997202337 9.52127698213606 0.711653654425974
35.1509233359247 9.09574504997355 0.695569008579737
35.1711469516158 10.3191493549408 0.740871746937468
35.1913705673069 10.531915321022 0.748470630346173
35.2115941829979 10.1595748803798 0.735121038400963
35.231817798689 11.2765962023064 0.774479806885225
35.2520414143801 10.5851068125423 0.750358327241694
35.2722650300711 10.5851068125423 0.750358327241694
35.2924886457622 11.542553659908 0.783559598960892
35.3127122614533 11.7021281344689 0.788957317878617
35.3329358771443 12.7659579648752 0.824039043272424
35.3531594928354 11.9680855920705 0.797872372804697
35.3733831085265 12.9787239309564 0.830877658815035
35.3936067242175 14.6276601680861 0.882081097061248
35.4138303399086 13.6170218292002 0.851063864325011
35.4340539555997 14.0425537613627 0.864259439821784
35.4542775712907 14.3085112189642 0.872405326194105
35.4745011869818 15.0531921002486 0.894819389572007
35.4947248026729 15.1595750832893 0.897975728789109
35.5149484183639 14.8936176256877 0.890063894135445
35.535172034055 14.8404261341674 0.888473072677725
35.5553956497461 14.4680856935252 0.877256551689589
35.5756192654371 13.0319154224767 0.832578536048167
35.5958428811282 13.4574473546392 0.84606246628092
35.6160664968193 12.9787239309564 0.830877658815035
35.6362901125103 13.5638303376799 0.849400003761281
35.6565137282014 12.8723409479158 0.827465415819684
35.6767373438925 11.2234047107861 0.772651044458506
35.6969609595835 11.9148941005501 0.796097348642013
35.7171845752746 11.7021281344689 0.788957317878617
35.7374081909657 10.3723408464611 0.742778755875753
35.7576318066567 10.9574472531845 0.763441525365265
35.7778554223478 10.9042557616642 0.761586257676625
35.7980790380389 9.52127698213606 0.711653654425974
35.8183026537299 10.1063833888595 0.73319411231239
35.838526269421 8.98936206693292 0.691489389764071
35.858749885112 10.6382983040626 0.752241287108804
35.8789735008031 8.35106416868917 0.666487478437833
35.8991971164942 8.67021311781104 0.679103502814817
35.9194207321852 8.56383013477042 0.674924364647657
35.9396443478763 9.680851456697 0.717592452697427
35.9598679635674 9.14893654149386 0.697599871320769
35.9800915792584 9.46808549061574 0.709663010933843
36.0003151949495 8.40425566020948 0.668606680855476
36.0205388106406 9.25531952453449 0.701643962424722
36.0407624263316 8.19148969412823 0.660089050510576
36.0609860420227 8.61702162629073 0.677017158397923
36.0812096577138 9.46808549061574 0.709663010933843
36.1014332734048 8.93617057541261 0.68944052780942
36.1216568890959 8.45744715172979 0.670719187480671
36.141880504787 8.24468118564854 0.662228728895168
36.162104120478 8.67021311781104 0.679103502814817
36.1823277361691 8.24468118564854 0.662228728895168
36.2025513518602 8.29787267716885 0.664361516152362
36.2227749675512 7.97872372804697 0.651460064411727
36.2429985832423 7.2872343382829 0.622590446048853
36.2632221989334 8.72340460933136 0.681183457157842
36.2834458146244 9.14893654149386 0.697599871320769
36.3036694303155 8.0851067110876 0.655788750333248
36.3238930460066 8.29787267716885 0.664361516152362
36.3441166616976 7.39361732132353 0.62711843622367
36.3643402773887 8.8829790838923 0.687385558923066
36.3845638930798 7.71276627044541 0.640510375928879
36.4047875087708 7.71276627044541 0.640510375928879
36.4250111244619 8.45744715172979 0.670719187480671
36.445234740153 7.34042582980322 0.624858542617019
36.465458355844 8.40425566020948 0.668606680855476
36.4856819715351 8.61702162629073 0.677017158397923
36.5059055872262 8.51063864325011 0.672825061382888
36.5261292029172 7.60638328740478 0.636077724914372
36.5463528186083 7.97872372804697 0.651460064411727
36.5665764342994 8.13829820260791 0.657942413767192
36.5868000499904 7.71276627044541 0.640510375928879
36.6070236656815 7.92553223652666 0.64928489952653
36.6272472813725 8.82978759237199 0.685324428169477
36.6474708970636 8.0851067110876 0.655788750333248
36.6676945127547 7.6595747789251 0.638297898243758
36.6879181284457 8.03191521956729 0.653627990751228
36.7081417441368 8.19148969412823 0.660089050510576
36.7283653598279 7.71276627044541 0.640510375928879
36.7485889755189 7.50000030436416 0.631613966431975
36.76881259121 8.77659610085167 0.683257079784517
36.7890362069011 7.18085135524228 0.618029282454318
36.8092598225921 8.29787267716885 0.664361516152362
36.8294834382832 8.51063864325011 0.672825061382888
36.8497070539743 7.97872372804697 0.651460064411727
36.8699306696653 8.77659610085167 0.683257079784517
36.8901542853564 8.61702162629073 0.677017158397923
36.9103779010475 6.91489389764071 0.606476314558303
36.9306015167385 7.50000030436416 0.631613966431975
36.9508251324296 7.97872372804697 0.651460064411727
36.9710487481207 7.76595776196572 0.64271523744401
36.9912723638117 8.61702162629073 0.677017158397923
37.0114959795028 7.97872372804697 0.651460064411727
37.0317195951939 8.51063864325011 0.672825061382888
37.0519432108849 7.23404284676259 0.620314056540036
37.072166826576 8.13829820260791 0.657942413767192
37.0923904422671 8.13829820260791 0.657942413767192
37.1126140579581 7.81914925348604 0.64491256090486
37.1328376736492 8.56383013477042 0.674924364647657
37.1530612893403 8.24468118564854 0.662228728895168
37.1732849050313 8.13829820260791 0.657942413767192
37.1935085207224 8.35106416868917 0.666487478437833
37.2137321364135 8.93617057541261 0.68944052780942
37.2339557521045 8.03191521956729 0.653627990751228
37.2541793677956 7.60638328740478 0.636077724914372
37.2744029834867 8.51063864325011 0.672825061382888
37.2946265991777 8.45744715172979 0.670719187480671
37.3148502148688 8.03191521956729 0.653627990751228
37.3350738305599 7.39361732132353 0.62711843622367
37.3552974462509 7.76595776196572 0.64271523744401
37.375521061942 6.96808538916102 0.608804447167049
37.395744677633 7.02127688068134 0.611123710602471
37.4159682933241 7.02127688068134 0.611123710602471
37.4361919090152 7.18085135524228 0.618029282454318
37.4564155247062 7.02127688068134 0.611123710602471
37.4766391403973 7.44680881284384 0.629370215232479
37.4968627560884 6.75531942307977 0.599437666325494
37.5170863717794 7.55319179588447 0.633849775074574
37.5373099874705 7.71276627044541 0.640510375928879
37.5575336031616 7.6595747789251 0.638297898243758
37.5777572188526 7.34042582980322 0.624858542617019
37.5979808345437 7.76595776196572 0.64271523744401
37.6182044502348 8.24468118564854 0.662228728895168
37.6384280659258 7.2872343382829 0.622590446048853
37.6586516816169 7.81914925348604 0.64491256090486
37.678875297308 8.67021311781104 0.679103502814817
37.699098912999 7.12765986372196 0.615736030455294
37.7193225286901 7.44680881284384 0.629370215232479
37.7395461443812 7.12765986372196 0.615736030455294
37.7597697600722 7.76595776196572 0.64271523744401
37.7799933757633 6.59574494851883 0.59231538178515
37.8002169914544 6.80851091460008 0.601793029687043
37.8204406071454 7.39361732132353 0.62711843622367
37.8406642228365 7.71276627044541 0.640510375928879
37.8608878385276 6.22340450787664 0.575353950284691
37.8811114542186 6.96808538916102 0.608804447167049
37.9013350699097 6.32978749091727 0.580250667943183
37.9215586856008 7.07446837220165 0.613434205461912
37.9417823012918 7.07446837220165 0.613434205461912
37.9620059169829 6.54255345699852 0.5899221785364
37.982229532674 6.8617024061204 0.604139210240542
38.002453148365 7.23404284676259 0.620314056540036
38.0226767640561 7.12765986372196 0.615736030455294
38.0429003797472 7.55319179588447 0.633849775074574
38.0631239954382 6.80851091460008 0.601793029687043
38.0833476111293 7.18085135524228 0.618029282454318
38.1035712268204 8.19148969412823 0.660089050510576
38.1237948425114 6.96808538916102 0.608804447167049
38.1440184582025 6.96808538916102 0.608804447167049
38.1642420738935 8.03191521956729 0.653627990751228
38.1844656895846 6.54255345699852 0.5899221785364
38.2046893052757 7.2872343382829 0.622590446048853
38.2249129209667 7.44680881284384 0.629370215232479
38.2451365366578 7.18085135524228 0.618029282454318
38.2653601523489 7.71276627044541 0.640510375928879
38.2855837680399 7.55319179588447 0.633849775074574
38.305807383731 7.2872343382829 0.622590446048853
38.3260309994221 8.61702162629073 0.677017158397923
38.3462546151131 6.38297898243758 0.582683595460406
38.3664782308042 6.70212793155946 0.59707301148151
38.3867018464953 6.70212793155946 0.59707301148151
38.4069254621863 6.43617047395789 0.585106406723445
38.4271490778774 7.6595747789251 0.638297898243758
38.4473726935685 6.80851091460008 0.601793029687043
38.4675963092595 7.23404284676259 0.620314056540036
38.4878199249506 6.59574494851883 0.59231538178515
38.5080435406417 7.55319179588447 0.633849775074574
38.5282671563327 6.96808538916102 0.608804447167049
38.5484907720238 8.19148969412823 0.660089050510576
38.5687143877149 7.34042582980322 0.624858542617019
38.5889380034059 7.55319179588447 0.633849775074574
38.609161619097 6.96808538916102 0.608804447167049
38.6293852347881 6.91489389764071 0.606476314558303
38.6496088504791 6.75531942307977 0.599437666325494
38.6698324661702 6.43617047395789 0.585106406723445
38.6900560818613 6.80851091460008 0.601793029687043
38.7102796975523 6.96808538916102 0.608804447167049
38.7305033132434 7.34042582980322 0.624858542617019
38.7507269289345 7.2872343382829 0.622590446048853
38.7709505446255 6.75531942307977 0.599437666325494
38.7911741603166 6.70212793155946 0.59707301148151
38.8113977760077 7.34042582980322 0.624858542617019
38.8316213916987 7.2872343382829 0.622590446048853
38.8518450073898 7.02127688068134 0.611123710602471
38.8720686230809 6.43617047395789 0.585106406723445
38.8922922387719 6.17021301635633 0.572889896348368
38.912515854463 8.13829820260791 0.657942413767192
38.932739470154 7.34042582980322 0.624858542617019
38.9529630858451 5.85106406723445 0.55787706953872
38.9731867015362 6.32978749091727 0.580250667943183
38.9934103172272 7.2872343382829 0.622590446048853
39.0136339329183 6.38297898243758 0.582683595460406
39.0338575486094 7.18085135524228 0.618029282454318
39.0540811643004 6.17021301635633 0.572889896348368
39.0743047799915 6.32978749091727 0.580250667943183
39.0945283956826 7.76595776196572 0.64271523744401
39.1147520113736 6.64893644003915 0.594698954320119
39.1349756270647 7.55319179588447 0.633849775074574
39.1551992427558 6.91489389764071 0.606476314558303
39.1754228584468 6.70212793155946 0.59707301148151
39.1956464741379 6.48936196547821 0.587519226884514
39.215870089829 7.71276627044541 0.640510375928879
39.23609370552 7.12765986372196 0.615736030455294
39.2563173212111 6.43617047395789 0.585106406723445
39.2765409369022 5.58510660963288 0.545050594776606
39.2967645525932 8.0851067110876 0.655788750333248
39.3169881682843 6.59574494851883 0.59231538178515
39.3372117839754 7.39361732132353 0.62711843622367
39.3574353996664 6.80851091460008 0.601793029687043
39.3776590153575 6.75531942307977 0.599437666325494
39.3978826310486 7.87234074500635 0.647102423100873
39.4181062467396 6.75531942307977 0.599437666325494
39.4383298624307 8.24468118564854 0.662228728895168
39.4585534781218 6.54255345699852 0.5899221785364
39.4787770938128 6.27659599939695 0.5778074963847
39.4990007095039 6.32978749091727 0.580250667943183
39.519224325195 7.12765986372196 0.615736030455294
39.539447940886 6.59574494851883 0.59231538178515
39.5596715565771 6.80851091460008 0.601793029687043
39.5798951722682 7.50000030436416 0.631613966431975
39.6001187879592 6.70212793155946 0.59707301148151
39.6203424036503 7.12765986372196 0.615736030455294
39.6405660193414 7.07446837220165 0.613434205461912
39.6607896350324 7.12765986372196 0.615736030455294
39.6810132507235 7.39361732132353 0.62711843622367
39.7012368664145 7.81914925348604 0.64491256090486
39.7214604821056 6.70212793155946 0.59707301148151
39.7416840977967 7.76595776196572 0.64271523744401
39.7619077134877 6.54255345699852 0.5899221785364
39.7821313291788 7.60638328740478 0.636077724914372
39.8023549448699 7.39361732132353 0.62711843622367
39.8225785605609 7.02127688068134 0.611123710602471
39.842802176252 6.22340450787664 0.575353950284691
39.8630257919431 7.44680881284384 0.629370215232479
39.8832494076341 7.39361732132353 0.62711843622367
39.9034730233252 8.19148969412823 0.660089050510576
39.9236966390163 8.03191521956729 0.653627990751228
39.9439202547073 7.87234074500635 0.647102423100873
39.9641438703984 6.43617047395789 0.585106406723445
39.9843674860895 7.07446837220165 0.613434205461912
40.0045911017805 7.76595776196572 0.64271523744401
40.0248147174716 6.96808538916102 0.608804447167049
40.0450383331627 7.02127688068134 0.611123710602471
40.0652619488537 7.6595747789251 0.638297898243758
40.0854855645448 7.2872343382829 0.622590446048853
40.1057091802359 6.96808538916102 0.608804447167049
40.1259327959269 7.23404284676259 0.620314056540036
40.146156411618 6.0638300333157 0.567929717304644
40.1663800273091 6.75531942307977 0.599437666325494
40.1866036430001 7.07446837220165 0.613434205461912
40.2068272586912 7.92553223652666 0.64928489952653
40.2270508743823 6.70212793155946 0.59707301148151
40.2472744900733 7.60638328740478 0.636077724914372
40.2674981057644 7.07446837220165 0.613434205461912
40.2877217214555 6.11702152483601 0.570415198401908
40.3079453371465 6.80851091460008 0.601793029687043
40.3281689528376 6.80851091460008 0.601793029687043
40.3483925685287 6.11702152483601 0.570415198401908
40.3686161842197 5.79787257571413 0.555335475138186
40.3888397999108 7.39361732132353 0.62711843622367
40.4090634156019 6.91489389764071 0.606476314558303
40.4292870312929 8.19148969412823 0.660089050510576
40.449510646984 5.95744705027507 0.562925833709398
40.469734262675 7.55319179588447 0.633849775074574
40.4899578783661 6.91489389764071 0.606476314558303
40.5101814940572 6.38297898243758 0.582683595460406
40.5304051097482 6.59574494851883 0.59231538178515
40.5506287254393 6.64893644003915 0.594698954320119
40.5708523411304 6.80851091460008 0.601793029687043
40.5910759568214 6.80851091460008 0.601793029687043
40.6112995725125 6.0638300333157 0.567929717304644
40.6315231882036 6.22340450787664 0.575353950284691
40.6517468038946 6.96808538916102 0.608804447167049
40.6719704195857 7.55319179588447 0.633849775074574
40.6921940352768 6.8617024061204 0.604139210240542
40.7124176509678 7.18085135524228 0.618029282454318
40.7326412666589 6.17021301635633 0.572889896348368
40.75286488235 7.55319179588447 0.633849775074574
40.773088498041 7.23404284676259 0.620314056540036
40.7933121137321 7.02127688068134 0.611123710602471
40.8135357294232 6.38297898243758 0.582683595460406
40.8337593451142 6.38297898243758 0.582683595460406
40.8539829608053 6.80851091460008 0.601793029687043
40.8742065764964 7.50000030436416 0.631613966431975
40.8944301921874 6.59574494851883 0.59231538178515
40.9146538078785 7.18085135524228 0.618029282454318
40.9348774235696 7.71276627044541 0.640510375928879
40.9551010392606 6.59574494851883 0.59231538178515
40.9753246549517 6.27659599939695 0.5778074963847
40.9955482706428 7.02127688068134 0.611123710602471
41.0157718863338 7.23404284676259 0.620314056540036
41.0359955020249 7.02127688068134 0.611123710602471
41.056219117716 7.12765986372196 0.615736030455294
41.076442733407 7.18085135524228 0.618029282454318
41.0966663490981 7.23404284676259 0.620314056540036
41.1168899647892 7.44680881284384 0.629370215232479
41.1371135804802 7.12765986372196 0.615736030455294
41.1573371961713 8.03191521956729 0.653627990751228
41.1775608118624 7.87234074500635 0.647102423100873
41.1977844275534 6.91489389764071 0.606476314558303
41.2180080432445 7.23404284676259 0.620314056540036
41.2382316589355 6.22340450787664 0.575353950284691
41.2584552746266 6.32978749091727 0.580250667943183
41.2786788903177 7.12765986372196 0.615736030455294
41.2989025060087 6.96808538916102 0.608804447167049
41.3191261216998 6.27659599939695 0.5778074963847
41.3393497373909 7.44680881284384 0.629370215232479
41.3595733530819 6.64893644003915 0.594698954320119
41.379796968773 7.97872372804697 0.651460064411727
41.4000205844641 6.59574494851883 0.59231538178515
41.4202442001551 6.70212793155946 0.59707301148151
41.4404678158462 8.24468118564854 0.662228728895168
41.4606914315373 6.48936196547821 0.587519226884514
41.4809150472283 6.43617047395789 0.585106406723445
41.5011386629194 8.03191521956729 0.653627990751228
41.5213622786105 7.39361732132353 0.62711843622367
41.5415858943015 7.71276627044541 0.640510375928879
41.5618095099926 7.81914925348604 0.64491256090486
41.5820331256837 7.97872372804697 0.651460064411727
41.6022567413747 7.71276627044541 0.640510375928879
41.6224803570658 6.96808538916102 0.608804447167049
41.6427039727569 8.03191521956729 0.653627990751228
41.6629275884479 6.17021301635633 0.572889896348368
41.683151204139 7.81914925348604 0.64491256090486
41.7033748198301 7.07446837220165 0.613434205461912
41.7235984355211 6.96808538916102 0.608804447167049
41.7438220512122 6.91489389764071 0.606476314558303
41.7640456669033 8.35106416868917 0.666487478437833
41.7842692825943 6.96808538916102 0.608804447167049
41.8044928982854 6.80851091460008 0.601793029687043
41.8247165139765 7.81914925348604 0.64491256090486
41.8449401296675 7.81914925348604 0.64491256090486
41.8651637453586 7.12765986372196 0.615736030455294
41.8853873610497 7.60638328740478 0.636077724914372
41.9056109767407 6.64893644003915 0.594698954320119
41.9258345924318 6.80851091460008 0.601793029687043
41.9460582081228 5.85106406723445 0.55787706953872
41.9662818238139 6.59574494851883 0.59231538178515
41.986505439505 7.02127688068134 0.611123710602471
42.006729055196 7.6595747789251 0.638297898243758
42.0269526708871 6.64893644003915 0.594698954320119
42.0471762865782 6.64893644003915 0.594698954320119
42.0673999022692 6.80851091460008 0.601793029687043
42.0876235179603 7.07446837220165 0.613434205461912
42.1078471336514 7.02127688068134 0.611123710602471
42.1280707493424 7.60638328740478 0.636077724914372
42.1482943650335 7.12765986372196 0.615736030455294
42.1685179807246 6.91489389764071 0.606476314558303
42.1887415964156 7.44680881284384 0.629370215232479
42.2089652121067 7.60638328740478 0.636077724914372
42.2291888277978 7.60638328740478 0.636077724914372
42.2494124434888 7.60638328740478 0.636077724914372
42.2696360591799 6.22340450787664 0.575353950284691
42.289859674871 7.18085135524228 0.618029282454318
42.310083290562 7.87234074500635 0.647102423100873
42.3303069062531 6.8617024061204 0.604139210240542
42.3505305219442 7.71276627044541 0.640510375928879
42.3707541376352 6.91489389764071 0.606476314558303
42.3909777533263 6.70212793155946 0.59707301148151
42.4112013690174 7.87234074500635 0.647102423100873
42.4314249847084 6.17021301635633 0.572889896348368
42.4516486003995 6.0638300333157 0.567929717304644
42.4718722160906 7.07446837220165 0.613434205461912
42.4920958317816 6.8617024061204 0.604139210240542
42.5123194474727 8.29787267716885 0.664361516152362
42.5325430631638 6.96808538916102 0.608804447167049
42.5527666788548 6.91489389764071 0.606476314558303
42.5729902945459 6.75531942307977 0.599437666325494
42.593213910237 7.02127688068134 0.611123710602471
42.613437525928 6.43617047395789 0.585106406723445
42.6336611416191 7.44680881284384 0.629370215232479
42.6538847573102 7.18085135524228 0.618029282454318
42.6741083730012 7.92553223652666 0.64928489952653
42.6943319886923 6.8617024061204 0.604139210240542
42.7145556043833 7.81914925348604 0.64491256090486
42.7347792200744 7.34042582980322 0.624858542617019
42.7550028357655 7.39361732132353 0.62711843622367
42.7752264514565 6.43617047395789 0.585106406723445
42.7954500671476 7.44680881284384 0.629370215232479
42.8156736828387 7.23404284676259 0.620314056540036
42.8358972985297 8.67021311781104 0.679103502814817
42.8561209142208 8.40425566020948 0.668606680855476
42.8763445299119 7.2872343382829 0.622590446048853
42.8965681456029 7.97872372804697 0.651460064411727
42.916791761294 8.40425566020948 0.668606680855476
42.9370153769851 7.50000030436416 0.631613966431975
42.9572389926761 8.40425566020948 0.668606680855476
42.9774626083672 8.29787267716885 0.664361516152362
42.9976862240583 7.02127688068134 0.611123710602471
43.0179098397493 6.91489389764071 0.606476314558303
43.0381334554404 7.07446837220165 0.613434205461912
43.0583570711315 7.50000030436416 0.631613966431975
43.0785806868225 7.76595776196572 0.64271523744401
43.0988043025136 7.6595747789251 0.638297898243758
43.1190279182047 8.98936206693292 0.691489389764071
43.1392515338957 8.93617057541261 0.68944052780942
43.1594751495868 7.97872372804697 0.651460064411727
43.1796987652779 8.98936206693292 0.691489389764071
43.1999223809689 8.77659610085167 0.683257079784517
43.22014599666 7.44680881284384 0.629370215232479
43.2403696123511 7.18085135524228 0.618029282454318
43.2605932280421 7.2872343382829 0.622590446048853
43.2808168437332 7.81914925348604 0.64491256090486
43.3010404594243 8.72340460933136 0.681183457157842
43.3212640751153 6.96808538916102 0.608804447167049
43.3414876908064 8.13829820260791 0.657942413767192
43.3617113064975 8.93617057541261 0.68944052780942
43.3819349221885 8.45744715172979 0.670719187480671
43.4021585378796 7.76595776196572 0.64271523744401
43.4223821535707 8.61702162629073 0.677017158397923
43.4426057692617 8.61702162629073 0.677017158397923
43.4628293849528 7.39361732132353 0.62711843622367
43.4830530006438 7.18085135524228 0.618029282454318
43.5032766163349 7.23404284676259 0.620314056540036
43.523500232026 7.97872372804697 0.651460064411727
43.543723847717 7.23404284676259 0.620314056540036
43.5639474634081 7.81914925348604 0.64491256090486
43.5841710790992 7.12765986372196 0.615736030455294
43.6043946947902 7.76595776196572 0.64271523744401
43.6246183104813 7.71276627044541 0.640510375928879
43.6448419261724 7.23404284676259 0.620314056540036
43.6650655418634 7.34042582980322 0.624858542617019
43.6852891575545 6.91489389764071 0.606476314558303
43.7055127732456 7.39361732132353 0.62711843622367
43.7257363889366 8.03191521956729 0.653627990751228
43.7459600046277 7.39361732132353 0.62711843622367
43.7661836203188 7.39361732132353 0.62711843622367
43.7864072360098 7.23404284676259 0.620314056540036
43.8066308517009 6.75531942307977 0.599437666325494
43.826854467392 7.81914925348604 0.64491256090486
43.847078083083 6.80851091460008 0.601793029687043
43.8673016987741 7.6595747789251 0.638297898243758
43.8875253144652 6.43617047395789 0.585106406723445
43.9077489301562 6.32978749091727 0.580250667943183
43.9279725458473 6.64893644003915 0.594698954320119
43.9481961615384 7.07446837220165 0.613434205461912
43.9684197772294 7.23404284676259 0.620314056540036
43.9886433929205 7.34042582980322 0.624858542617019
44.0088670086116 7.76595776196572 0.64271523744401
44.0290906243026 7.87234074500635 0.647102423100873
44.0493142399937 6.91489389764071 0.606476314558303
44.0695378556848 7.44680881284384 0.629370215232479
44.0897614713758 5.90425555875476 0.560407137255822
44.1099850870669 6.43617047395789 0.585106406723445
44.130208702758 6.75531942307977 0.599437666325494
44.150432318449 7.18085135524228 0.618029282454318
44.1706559341401 6.43617047395789 0.585106406723445
44.1908795498312 7.60638328740478 0.636077724914372
44.2111031655222 6.32978749091727 0.580250667943183
44.2313267812133 7.6595747789251 0.638297898243758
44.2515503969043 6.48936196547821 0.587519226884514
44.2717740125954 6.91489389764071 0.606476314558303
44.2919976282865 7.97872372804697 0.651460064411727
44.3122212439775 6.43617047395789 0.585106406723445
44.3324448596686 6.59574494851883 0.59231538178515
44.3526684753597 7.18085135524228 0.618029282454318
44.3728920910507 6.48936196547821 0.587519226884514
44.3931157067418 5.90425555875476 0.560407137255822
44.4133393224329 7.18085135524228 0.618029282454318
44.4335629381239 7.02127688068134 0.611123710602471
44.453786553815 6.8617024061204 0.604139210240542
44.4740101695061 6.75531942307977 0.599437666325494
44.4942337851971 7.87234074500635 0.647102423100873
44.5144574008882 7.6595747789251 0.638297898243758
44.5346810165793 7.18085135524228 0.618029282454318
44.5549046322703 6.43617047395789 0.585106406723445
44.5751282479614 7.02127688068134 0.611123710602471
44.5953518636525 7.44680881284384 0.629370215232479
44.6155754793435 5.53191511811257 0.542448906438364
44.6357990950346 7.34042582980322 0.624858542617019
44.6560227107257 7.34042582980322 0.624858542617019
44.6762463264167 6.38297898243758 0.582683595460406
44.6964699421078 6.11702152483601 0.570415198401908
44.7166935577989 7.60638328740478 0.636077724914372
44.7369171734899 5.6382981011532 0.547639923340591
44.757140789181 7.18085135524228 0.618029282454318
44.7773644048721 7.44680881284384 0.629370215232479
44.7975880205631 6.80851091460008 0.601793029687043
44.8178116362542 8.29787267716885 0.664361516152362
44.8380352519453 6.17021301635633 0.572889896348368
44.8582588676363 6.43617047395789 0.585106406723445
44.8784824833274 7.39361732132353 0.62711843622367
44.8987060990185 6.32978749091727 0.580250667943183
44.9189297147095 6.43617047395789 0.585106406723445
44.9391533304006 6.75531942307977 0.599437666325494
44.9593769460917 6.91489389764071 0.606476314558303
44.9796005617827 6.17021301635633 0.572889896348368
44.9998241774738 7.12765986372196 0.615736030455294
45.0200477931648 7.2872343382829 0.622590446048853
45.0402714088559 6.8617024061204 0.604139210240542
45.060495024547 7.12765986372196 0.615736030455294
45.080718640238 6.64893644003915 0.594698954320119
45.1009422559291 6.80851091460008 0.601793029687043
45.1211658716202 6.22340450787664 0.575353950284691
45.1413894873112 6.75531942307977 0.599437666325494
45.1616131030023 6.59574494851883 0.59231538178515
45.1818367186934 6.96808538916102 0.608804447167049
45.2020603343844 5.69148959267351 0.550217066626112
45.2222839500755 7.02127688068134 0.611123710602471
45.2425075657666 6.54255345699852 0.5899221785364
45.2627311814576 6.91489389764071 0.606476314558303
45.2829547971487 5.95744705027507 0.562925833709398
45.3031784128398 7.50000030436416 0.631613966431975
45.3234020285308 7.12765986372196 0.615736030455294
45.3436256442219 7.39361732132353 0.62711843622367
45.363849259913 6.96808538916102 0.608804447167049
45.384072875604 7.34042582980322 0.624858542617019
45.4042964912951 6.91489389764071 0.606476314558303
45.4245201069862 6.80851091460008 0.601793029687043
45.4447437226772 6.32978749091727 0.580250667943183
45.4649673383683 7.12765986372196 0.615736030455294
45.4851909540594 6.59574494851883 0.59231538178515
45.5054145697504 7.87234074500635 0.647102423100873
45.5256381854415 6.75531942307977 0.599437666325494
45.5458618011326 6.64893644003915 0.594698954320119
45.5660854168236 7.34042582980322 0.624858542617019
45.5863090325147 7.07446837220165 0.613434205461912
45.6065326482058 7.39361732132353 0.62711843622367
45.6267562638968 6.64893644003915 0.594698954320119
45.6469798795879 5.90425555875476 0.560407137255822
45.667203495279 6.43617047395789 0.585106406723445
45.68742711097 7.39361732132353 0.62711843622367
45.7076507266611 6.75531942307977 0.599437666325494
45.7278743423522 7.18085135524228 0.618029282454318
45.7480979580432 7.02127688068134 0.611123710602471
45.7683215737343 8.03191521956729 0.653627990751228
45.7885451894253 6.17021301635633 0.572889896348368
45.8087688051164 6.32978749091727 0.580250667943183
45.8289924208075 7.02127688068134 0.611123710602471
45.8492160364985 7.07446837220165 0.613434205461912
45.8694396521896 5.265957660511 0.529248658236749
45.8896632678807 7.02127688068134 0.611123710602471
45.9098868835717 6.91489389764071 0.606476314558303
45.9301104992628 7.07446837220165 0.613434205461912
45.9503341149539 5.85106406723445 0.55787706953872
45.9705577306449 6.11702152483601 0.570415198401908
45.990781346336 6.32978749091727 0.580250667943183
46.0110049620271 7.18085135524228 0.618029282454318
46.0312285777181 6.32978749091727 0.580250667943183
46.0514521934092 5.79787257571413 0.555335475138186
46.0716758091003 7.44680881284384 0.629370215232479
46.0918994247913 7.23404284676259 0.620314056540036
46.1121230404824 6.38297898243758 0.582683595460406
46.1323466561735 6.8617024061204 0.604139210240542
46.1525702718645 6.27659599939695 0.5778074963847
46.1727938875556 6.64893644003915 0.594698954320119
46.1930175032467 5.90425555875476 0.560407137255822
46.2132411189377 6.48936196547821 0.587519226884514
46.2334647346288 6.59574494851883 0.59231538178515
46.2536883503199 7.02127688068134 0.611123710602471
46.2739119660109 6.64893644003915 0.594698954320119
46.294135581702 6.22340450787664 0.575353950284691
46.3143591973931 6.70212793155946 0.59707301148151
46.3345828130841 6.80851091460008 0.601793029687043
46.3548064287752 7.02127688068134 0.611123710602471
46.3750300444663 6.96808538916102 0.608804447167049
46.3952536601573 6.64893644003915 0.594698954320119
46.4154772758484 6.17021301635633 0.572889896348368
46.4357008915395 6.54255345699852 0.5899221785364
46.4559245072305 7.2872343382829 0.622590446048853
46.4761481229216 6.43617047395789 0.585106406723445
46.4963717386127 6.70212793155946 0.59707301148151
46.5165953543037 7.07446837220165 0.613434205461912
46.5368189699948 6.96808538916102 0.608804447167049
46.5570425856858 7.07446837220165 0.613434205461912
46.5772662013769 6.48936196547821 0.587519226884514
46.597489817068 5.6382981011532 0.547639923340591
46.617713432759 6.54255345699852 0.5899221785364
46.6379370484501 6.32978749091727 0.580250667943183
46.6581606641412 6.75531942307977 0.599437666325494
46.6783842798322 6.27659599939695 0.5778074963847
46.6986078955233 8.03191521956729 0.653627990751228
46.7188315112144 6.59574494851883 0.59231538178515
46.7390551269054 7.76595776196572 0.64271523744401
46.7592787425965 6.01063854179539 0.565433310857768
46.7795023582876 6.54255345699852 0.5899221785364
46.7997259739786 6.11702152483601 0.570415198401908
46.8199495896697 6.27659599939695 0.5778074963847
46.8401732053608 6.27659599939695 0.5778074963847
46.8603968210518 6.96808538916102 0.608804447167049
46.8806204367429 7.02127688068134 0.611123710602471
46.900844052434 6.22340450787664 0.575353950284691
46.921067668125 6.38297898243758 0.582683595460406
46.9412912838161 7.07446837220165 0.613434205461912
46.9615148995072 6.8617024061204 0.604139210240542
46.9817385151982 5.6382981011532 0.547639923340591
47.0019621308893 6.01063854179539 0.565433310857768
47.0221857465804 6.11702152483601 0.570415198401908
47.0424093622714 7.44680881284384 0.629370215232479
47.0626329779625 5.95744705027507 0.562925833709398
47.0828565936536 6.80851091460008 0.601793029687043
47.1030802093446 6.38297898243758 0.582683595460406
47.1233038250357 6.0638300333157 0.567929717304644
47.1435274407268 6.38297898243758 0.582683595460406
47.1637510564178 6.22340450787664 0.575353950284691
47.1839746721089 6.59574494851883 0.59231538178515
47.2041982878 7.34042582980322 0.624858542617019
47.224421903491 6.59574494851883 0.59231538178515
47.2446455191821 7.2872343382829 0.622590446048853
47.2648691348732 6.48936196547821 0.587519226884514
47.2850927505642 7.39361732132353 0.62711843622367
47.3053163662553 5.90425555875476 0.560407137255822
47.3255399819463 6.48936196547821 0.587519226884514
47.3457635976374 6.80851091460008 0.601793029687043
47.3659872133285 6.22340450787664 0.575353950284691
47.3862108290195 5.53191511811257 0.542448906438364
47.4064344447106 6.8617024061204 0.604139210240542
47.4266580604017 6.38297898243758 0.582683595460406
47.4468816760927 5.42553213507194 0.537207731288247
47.4671052917838 6.91489389764071 0.606476314558303
47.4873289074749 6.59574494851883 0.59231538178515
47.5075525231659 6.01063854179539 0.565433310857768
47.527776138857 5.90425555875476 0.560407137255822
47.5479997545481 7.02127688068134 0.611123710602471
47.5682233702391 6.8617024061204 0.604139210240542
47.5884469859302 6.59574494851883 0.59231538178515
47.6086706016213 6.0638300333157 0.567929717304644
47.6288942173123 6.64893644003915 0.594698954320119
47.6491178330034 6.38297898243758 0.582683595460406
47.6693414486945 7.34042582980322 0.624858542617019
47.6895650643855 6.17021301635633 0.572889896348368
47.7097886800766 5.95744705027507 0.562925833709398
47.7300122957677 6.0638300333157 0.567929717304644
47.7502359114587 5.69148959267351 0.550217066626112
47.7704595271498 6.64893644003915 0.594698954320119
47.7906831428409 5.37234064355163 0.534567873881054
47.8109067585319 6.38297898243758 0.582683595460406
47.831130374223 6.17021301635633 0.572889896348368
47.8513539899141 7.18085135524228 0.618029282454318
47.8715776056051 6.01063854179539 0.565433310857768
47.8918012212962 6.01063854179539 0.565433310857768
47.9120248369873 6.64893644003915 0.594698954320119
47.9322484526783 6.80851091460008 0.601793029687043
47.9524720683694 6.11702152483601 0.570415198401908
47.9726956840605 7.18085135524228 0.618029282454318
47.9929192997515 6.8617024061204 0.604139210240542
48.0131429154426 6.22340450787664 0.575353950284691
48.0333665311337 6.17021301635633 0.572889896348368
48.0535901468247 6.75531942307977 0.599437666325494
48.0738137625158 5.69148959267351 0.550217066626112
48.0940373782068 6.11702152483601 0.570415198401908
48.1142609938979 5.69148959267351 0.550217066626112
48.134484609589 7.2872343382829 0.622590446048853
48.15470822528 6.91489389764071 0.606476314558303
48.1749318409711 6.75531942307977 0.599437666325494
48.1951554566622 6.32978749091727 0.580250667943183
48.2153790723532 7.07446837220165 0.613434205461912
48.2356026880443 6.80851091460008 0.601793029687043
48.2558263037354 7.12765986372196 0.615736030455294
48.2760499194264 6.43617047395789 0.585106406723445
48.2962735351175 5.10638318595006 0.521168051529382
48.3164971508086 5.95744705027507 0.562925833709398
48.3367207664996 6.48936196547821 0.587519226884514
48.3569443821907 6.11702152483601 0.570415198401908
48.3771679978818 6.64893644003915 0.594698954320119
48.3973916135728 8.19148969412823 0.660089050510576
48.4176152292639 7.6595747789251 0.638297898243758
48.437838844955 6.17021301635633 0.572889896348368
48.458062460646 5.58510660963288 0.545050594776606
48.4782860763371 5.05319169442975 0.518446528742142
48.4985096920282 6.38297898243758 0.582683595460406
48.5187333077192 7.39361732132353 0.62711843622367
48.5389569234103 6.11702152483601 0.570415198401908
48.5591805391014 6.54255345699852 0.5899221785364
48.5794041547924 6.48936196547821 0.587519226884514
48.5996277704835 6.43617047395789 0.585106406723445
48.6198513861746 6.38297898243758 0.582683595460406
48.6400750018656 6.59574494851883 0.59231538178515
48.6602986175567 6.8617024061204 0.604139210240542
48.6805222332478 6.96808538916102 0.608804447167049
48.7007458489388 6.22340450787664 0.575353950284691
48.7209694646299 7.2872343382829 0.622590446048853
48.741193080321 7.18085135524228 0.618029282454318
48.761416696012 6.27659599939695 0.5778074963847
48.7816403117031 5.79787257571413 0.555335475138186
48.8018639273942 7.23404284676259 0.620314056540036
48.8220875430852 7.02127688068134 0.611123710602471
48.8423111587763 5.58510660963288 0.545050594776606
48.8625347744673 6.48936196547821 0.587519226884514
48.8827583901584 6.32978749091727 0.580250667943183
48.9029820058495 6.64893644003915 0.594698954320119
48.9232056215405 6.17021301635633 0.572889896348368
48.9434292372316 6.01063854179539 0.565433310857768
48.9636528529227 6.38297898243758 0.582683595460406
48.9838764686137 6.43617047395789 0.585106406723445
49.0041000843048 6.96808538916102 0.608804447167049
49.0243236999959 6.27659599939695 0.5778074963847
49.0445473156869 6.96808538916102 0.608804447167049
49.064770931378 6.27659599939695 0.5778074963847
49.0849945470691 5.90425555875476 0.560407137255822
49.1052181627601 6.91489389764071 0.606476314558303
49.1254417784512 6.0638300333157 0.567929717304644
49.1456653941423 6.17021301635633 0.572889896348368
49.1658890098333 6.38297898243758 0.582683595460406
49.1861126255244 6.43617047395789 0.585106406723445
49.2063362412155 6.38297898243758 0.582683595460406
49.2265598569065 6.48936196547821 0.587519226884514
49.2467834725976 5.53191511811257 0.542448906438364
49.2670070882887 6.75531942307977 0.599437666325494
49.2872307039797 5.95744705027507 0.562925833709398
49.3074543196708 6.48936196547821 0.587519226884514
49.3276779353619 6.0638300333157 0.567929717304644
49.3479015510529 6.64893644003915 0.594698954320119
49.368125166744 6.11702152483601 0.570415198401908
49.3883487824351 5.85106406723445 0.55787706953872
49.4085723981261 6.54255345699852 0.5899221785364
49.4287960138172 6.27659599939695 0.5778074963847
49.4490196295083 6.43617047395789 0.585106406723445
49.4692432451993 6.0638300333157 0.567929717304644
49.4894668608904 6.32978749091727 0.580250667943183
49.5096904765815 6.01063854179539 0.565433310857768
49.5299140922725 7.07446837220165 0.613434205461912
49.5501377079636 6.22340450787664 0.575353950284691
49.5703613236547 5.90425555875476 0.560407137255822
49.5905849393457 6.0638300333157 0.567929717304644
49.6108085550368 6.17021301635633 0.572889896348368
49.6310321707278 6.70212793155946 0.59707301148151
49.6512557864189 6.17021301635633 0.572889896348368
49.67147940211 6.22340450787664 0.575353950284691
49.691703017801 5.42553213507194 0.537207731288247
49.7119266334921 6.27659599939695 0.5778074963847
49.7321502491832 5.69148959267351 0.550217066626112
49.7523738648742 5.85106406723445 0.55787706953872
49.7725974805653 6.0638300333157 0.567929717304644
49.7928210962564 6.38297898243758 0.582683595460406
49.8130447119474 5.79787257571413 0.555335475138186
49.8332683276385 6.75531942307977 0.599437666325494
49.8534919433296 6.17021301635633 0.572889896348368
49.8737155590206 5.21276616899069 0.526568900976162
49.8939391747117 6.54255345699852 0.5899221785364
49.9141627904028 6.96808538916102 0.608804447167049
49.9343864060938 5.69148959267351 0.550217066626112
49.9546100217849 6.48936196547821 0.587519226884514
49.974833637476 6.27659599939695 0.5778074963847
49.995057253167 6.27659599939695 0.5778074963847
50.0152808688581 5.6382981011532 0.547639923340591
50.0355044845492 6.48936196547821 0.587519226884514
50.0557281002402 5.79787257571413 0.555335475138186
50.0759517159313 7.60638328740478 0.636077724914372
50.0961753316224 5.95744705027507 0.562925833709398
50.1163989473134 6.54255345699852 0.5899221785364
50.1366225630045 6.43617047395789 0.585106406723445
50.1568461786956 6.38297898243758 0.582683595460406
50.1770697943866 6.01063854179539 0.565433310857768
50.1972934100777 7.02127688068134 0.611123710602471
50.2175170257688 5.85106406723445 0.55787706953872
50.2377406414598 6.59574494851883 0.59231538178515
50.2579642571509 6.32978749091727 0.580250667943183
50.278187872842 5.42553213507194 0.537207731288247
50.298411488533 5.90425555875476 0.560407137255822
50.3186351042241 6.17021301635633 0.572889896348368
50.3388587199152 6.11702152483601 0.570415198401908
50.3590823356062 5.90425555875476 0.560407137255822
50.3793059512973 6.32978749091727 0.580250667943183
50.3995295669883 6.8617024061204 0.604139210240542
50.4197531826794 6.8617024061204 0.604139210240542
50.4399767983705 6.11702152483601 0.570415198401908
50.4602004140615 6.01063854179539 0.565433310857768
50.4804240297526 5.53191511811257 0.542448906438364
50.5006476454437 5.6382981011532 0.547639923340591
50.5208712611347 5.79787257571413 0.555335475138186
50.5410948768258 5.6382981011532 0.547639923340591
50.5613184925169 6.91489389764071 0.606476314558303
50.5815421082079 6.0638300333157 0.567929717304644
50.601765723899 5.85106406723445 0.55787706953872
50.6219893395901 5.69148959267351 0.550217066626112
50.6422129552811 6.38297898243758 0.582683595460406
50.6624365709722 5.74468108419382 0.552782195061309
50.6826601866633 6.64893644003915 0.594698954320119
50.7028838023543 5.21276616899069 0.526568900976162
50.7231074180454 6.27659599939695 0.5778074963847
50.7433310337365 5.15957467747038 0.523875436249008
50.7635546494275 6.91489389764071 0.606476314558303
50.7837782651186 6.43617047395789 0.585106406723445
50.8040018808097 6.0638300333157 0.567929717304644
50.8242254965007 5.95744705027507 0.562925833709398
50.8444491121918 6.75531942307977 0.599437666325494
50.8646727278829 5.95744705027507 0.562925833709398
50.8848963435739 6.64893644003915 0.594698954320119
50.905119959265 5.15957467747038 0.523875436249008
50.9253435749561 5.53191511811257 0.542448906438364
50.9455671906471 6.80851091460008 0.601793029687043
50.9657908063382 6.11702152483601 0.570415198401908
50.9860144220293 6.64893644003915 0.594698954320119
51.0062380377203 5.47872362659226 0.539834679625181
51.0264616534114 6.0638300333157 0.567929717304644
51.0466852691025 6.27659599939695 0.5778074963847
51.0669088847935 6.22340450787664 0.575353950284691
51.0871325004846 5.6382981011532 0.547639923340591
51.1073561161757 6.0638300333157 0.567929717304644
51.1275797318667 5.21276616899069 0.526568900976162
51.1478033475578 5.90425555875476 0.560407137255822
51.1680269632488 6.54255345699852 0.5899221785364
51.1882505789399 6.01063854179539 0.565433310857768
51.208474194631 6.22340450787664 0.575353950284691
51.228697810322 6.22340450787664 0.575353950284691
51.2489214260131 5.95744705027507 0.562925833709398
51.2691450417042 5.85106406723445 0.55787706953872
51.2893686573952 6.59574494851883 0.59231538178515
51.3095922730863 5.85106406723445 0.55787706953872
51.3298158887774 5.58510660963288 0.545050594776606
51.3500395044684 7.12765986372196 0.615736030455294
51.3702631201595 6.38297898243758 0.582683595460406
51.3904867358506 6.43617047395789 0.585106406723445
51.4107103515416 5.53191511811257 0.542448906438364
51.4309339672327 5.47872362659226 0.539834679625181
51.4511575829238 6.75531942307977 0.599437666325494
51.4713811986148 6.38297898243758 0.582683595460406
51.4916048143059 6.43617047395789 0.585106406723445
51.511828429997 5.6382981011532 0.547639923340591
51.532052045688 6.17021301635633 0.572889896348368
51.5522756613791 7.02127688068134 0.611123710602471
51.5724992770702 6.22340450787664 0.575353950284691
51.5927228927612 6.70212793155946 0.59707301148151
51.6129465084523 6.54255345699852 0.5899221785364
51.6331701241434 4.78723423682818 0.504618796037166
51.6533937398344 5.74468108419382 0.552782195061309
51.6736173555255 5.74468108419382 0.552782195061309
51.6938409712166 6.17021301635633 0.572889896348368
51.7140645869076 6.11702152483601 0.570415198401908
51.7342882025987 5.85106406723445 0.55787706953872
51.7545118182898 5.58510660963288 0.545050594776606
51.7747354339808 5.79787257571413 0.555335475138186
51.7949590496719 5.42553213507194 0.537207731288247
51.815182665363 5.85106406723445 0.55787706953872
51.835406281054 7.07446837220165 0.613434205461912
51.8556298967451 6.38297898243758 0.582683595460406
51.8758535124362 5.90425555875476 0.560407137255822
51.8960771281272 6.91489389764071 0.606476314558303
51.9163007438183 5.90425555875476 0.560407137255822
51.9365243595093 7.23404284676259 0.620314056540036
51.9567479752004 6.0638300333157 0.567929717304644
51.9769715908915 6.0638300333157 0.567929717304644
51.9971952065825 5.90425555875476 0.560407137255822
52.0174188222736 6.22340450787664 0.575353950284691
52.0376424379647 6.17021301635633 0.572889896348368
52.0578660536557 5.74468108419382 0.552782195061309
52.0780896693468 6.27659599939695 0.5778074963847
52.0983132850379 6.38297898243758 0.582683595460406
52.1185369007289 6.0638300333157 0.567929717304644
52.13876051642 5.21276616899069 0.526568900976162
52.1589841321111 5.90425555875476 0.560407137255822
52.1792077478021 6.96808538916102 0.608804447167049
52.1994313634932 5.90425555875476 0.560407137255822
52.2196549791843 6.59574494851883 0.59231538178515
52.2398785948753 6.0638300333157 0.567929717304644
52.2601022105664 6.48936196547821 0.587519226884514
52.2803258262575 6.80851091460008 0.601793029687043
52.3005494419485 6.70212793155946 0.59707301148151
52.3207730576396 6.38297898243758 0.582683595460406
52.3409966733307 5.37234064355163 0.534567873881054
52.3612202890217 4.89361721986881 0.510194863610278
52.3814439047128 6.32978749091727 0.580250667943183
52.4016675204039 5.37234064355163 0.534567873881054
52.4218911360949 5.90425555875476 0.560407137255822
52.442114751786 5.79787257571413 0.555335475138186
52.4623383674771 6.0638300333157 0.567929717304644
52.4825619831681 5.265957660511 0.529248658236749
52.5027855988592 5.53191511811257 0.542448906438364
52.5230092145503 6.0638300333157 0.567929717304644
52.5432328302413 6.01063854179539 0.565433310857768
52.5634564459324 5.6382981011532 0.547639923340591
52.5836800616235 5.37234064355163 0.534567873881054
52.6039036773145 6.01063854179539 0.565433310857768
52.6241272930056 5.31914915203132 0.531914915203132
52.6443509086967 6.11702152483601 0.570415198401908
52.6645745243877 6.01063854179539 0.565433310857768
52.6847981400788 5.37234064355163 0.534567873881054
52.7050217557698 5.85106406723445 0.55787706953872
52.7252453714609 4.36170230466568 0.481669441788406
52.745468987152 6.75531942307977 0.599437666325494
52.765692602843 6.01063854179539 0.565433310857768
52.7859162185341 5.05319169442975 0.518446528742142
52.8061398342252 6.38297898243758 0.582683595460406
52.8263634499162 6.48936196547821 0.587519226884514
52.8465870656073 5.15957467747038 0.523875436249008
52.8668106812984 6.43617047395789 0.585106406723445
52.8870342969894 5.31914915203132 0.531914915203132
52.9072579126805 6.54255345699852 0.5899221785364
52.9274815283716 5.58510660963288 0.545050594776606
52.9477051440626 5.47872362659226 0.539834679625181
52.9679287597537 5.47872362659226 0.539834679625181
52.9881523754448 5.74468108419382 0.552782195061309
53.0083759911358 6.27659599939695 0.5778074963847
53.0285996068269 5.90425555875476 0.560407137255822
53.048823222518 6.11702152483601 0.570415198401908
53.069046838209 5.42553213507194 0.537207731288247
53.0892704539001 5.265957660511 0.529248658236749
53.1094940695912 6.75531942307977 0.599437666325494
53.1297176852822 6.22340450787664 0.575353950284691
53.1499413009733 5.10638318595006 0.521168051529382
53.1701649166644 6.0638300333157 0.567929717304644
53.1903885323554 5.95744705027507 0.562925833709398
53.2106121480465 6.43617047395789 0.585106406723445
53.2308357637376 5.6382981011532 0.547639923340591
53.2510593794286 6.38297898243758 0.582683595460406
53.2712829951197 6.32978749091727 0.580250667943183
53.2915066108108 6.38297898243758 0.582683595460406
53.3117302265018 6.27659599939695 0.5778074963847
53.3319538421929 6.59574494851883 0.59231538178515
53.352177457884 6.32978749091727 0.580250667943183
53.372401073575 6.80851091460008 0.601793029687043
53.3926246892661 6.38297898243758 0.582683595460406
53.4128483049572 5.95744705027507 0.562925833709398
53.4330719206482 6.59574494851883 0.59231538178515
53.4532955363393 6.22340450787664 0.575353950284691
53.4735191520303 6.8617024061204 0.604139210240542
53.4937427677214 6.27659599939695 0.5778074963847
53.5139663834125 6.80851091460008 0.601793029687043
53.5341899991035 5.85106406723445 0.55787706953872
53.5544136147946 7.2872343382829 0.622590446048853
53.5746372304857 6.27659599939695 0.5778074963847
53.5948608461767 6.75531942307977 0.599437666325494
53.6150844618678 6.32978749091727 0.580250667943183
53.6353080775589 6.59574494851883 0.59231538178515
53.6555316932499 6.32978749091727 0.580250667943183
53.675755308941 6.01063854179539 0.565433310857768
53.6959789246321 6.17021301635633 0.572889896348368
53.7162025403231 5.85106406723445 0.55787706953872
53.7364261560142 5.00000020290944 0.515710644057907
53.7566497717053 5.6382981011532 0.547639923340591
53.7768733873963 5.69148959267351 0.550217066626112
53.7970970030874 6.27659599939695 0.5778074963847
53.8173206187785 7.18085135524228 0.618029282454318
53.8375442344695 6.17021301635633 0.572889896348368
53.8577678501606 6.43617047395789 0.585106406723445
53.8779914658517 6.43617047395789 0.585106406723445
53.8982150815427 5.74468108419382 0.552782195061309
53.9184386972338 5.265957660511 0.529248658236749
53.9386623129249 5.69148959267351 0.550217066626112
53.9588859286159 5.37234064355163 0.534567873881054
53.979109544307 5.15957467747038 0.523875436249008
53.9993331599981 5.05319169442975 0.518446528742142
54.0195567756891 5.37234064355163 0.534567873881054
54.0397803913802 5.05319169442975 0.518446528742142
54.0600040070713 6.27659599939695 0.5778074963847
54.0802276227623 5.90425555875476 0.560407137255822
54.1004512384534 5.37234064355163 0.534567873881054
54.1206748541445 6.27659599939695 0.5778074963847
54.1408984698355 6.32978749091727 0.580250667943183
54.1611220855266 5.74468108419382 0.552782195061309
54.1813457012177 6.48936196547821 0.587519226884514
54.2015693169087 6.11702152483601 0.570415198401908
54.2217929325998 5.21276616899069 0.526568900976162
54.2420165482908 5.95744705027507 0.562925833709398
54.2622401639819 5.6382981011532 0.547639923340591
54.282463779673 5.79787257571413 0.555335475138186
54.302687395364 6.01063854179539 0.565433310857768
54.3229110110551 5.42553213507194 0.537207731288247
54.3431346267462 5.31914915203132 0.531914915203132
54.3633582424372 6.70212793155946 0.59707301148151
54.3835818581283 5.10638318595006 0.521168051529382
54.4038054738194 5.79787257571413 0.555335475138186
54.4240290895104 4.78723423682818 0.504618796037166
54.4442527052015 5.00000020290944 0.515710644057907
54.4644763208926 5.90425555875476 0.560407137255822
54.4846999365836 5.42553213507194 0.537207731288247
54.5049235522747 5.265957660511 0.529248658236749
54.5251471679658 6.01063854179539 0.565433310857768
54.5453707836568 6.17021301635633 0.572889896348368
54.5655943993479 5.58510660963288 0.545050594776606
54.585818015039 6.11702152483601 0.570415198401908
54.60604163073 5.10638318595006 0.521168051529382
54.6262652464211 5.79787257571413 0.555335475138186
54.6464888621122 5.79787257571413 0.555335475138186
54.6667124778032 6.8617024061204 0.604139210240542
54.6869360934943 5.37234064355163 0.534567873881054
54.7071597091854 5.53191511811257 0.542448906438364
54.7273833248764 5.47872362659226 0.539834679625181
54.7476069405675 5.6382981011532 0.547639923340591
54.7678305562586 5.79787257571413 0.555335475138186
54.7880541719496 5.69148959267351 0.550217066626112
54.8082777876407 6.91489389764071 0.606476314558303
54.8285014033318 7.07446837220165 0.613434205461912
54.8487250190228 5.37234064355163 0.534567873881054
54.8689486347139 6.0638300333157 0.567929717304644
54.889172250405 5.90425555875476 0.560407137255822
54.909395866096 6.11702152483601 0.570415198401908
54.9296194817871 5.85106406723445 0.55787706953872
54.9498430974782 5.95744705027507 0.562925833709398
54.9700667131692 5.6382981011532 0.547639923340591
54.9902903288603 5.47872362659226 0.539834679625181
55.0105139445513 5.265957660511 0.529248658236749
55.0307375602424 6.75531942307977 0.599437666325494
55.0509611759335 5.74468108419382 0.552782195061309
55.0711847916245 5.265957660511 0.529248658236749
55.0914084073156 5.58510660963288 0.545050594776606
55.1116320230067 5.265957660511 0.529248658236749
55.1318556386977 5.69148959267351 0.550217066626112
55.1520792543888 6.48936196547821 0.587519226884514
55.1723028700799 6.0638300333157 0.567929717304644
55.1925264857709 5.69148959267351 0.550217066626112
55.212750101462 5.85106406723445 0.55787706953872
55.2329737171531 5.47872362659226 0.539834679625181
55.2531973328441 6.17021301635633 0.572889896348368
55.2734209485352 5.21276616899069 0.526568900976162
55.2936445642263 4.89361721986881 0.510194863610278
55.3138681799173 5.90425555875476 0.560407137255822
55.3340917956084 6.01063854179539 0.565433310857768
55.3543154112995 5.90425555875476 0.560407137255822
55.3745390269905 5.90425555875476 0.560407137255822
55.3947626426816 5.74468108419382 0.552782195061309
55.4149862583727 7.07446837220165 0.613434205461912
55.4352098740637 5.15957467747038 0.523875436249008
55.4554334897548 5.15957467747038 0.523875436249008
55.4756571054459 5.42553213507194 0.537207731288247
55.4958807211369 5.74468108419382 0.552782195061309
55.516104336828 6.48936196547821 0.587519226884514
55.5363279525191 6.0638300333157 0.567929717304644
55.5565515682101 5.10638318595006 0.521168051529382
55.5767751839012 5.31914915203132 0.531914915203132
55.5969987995923 5.85106406723445 0.55787706953872
55.6172224152833 6.91489389764071 0.606476314558303
55.6374460309744 5.6382981011532 0.547639923340591
55.6576696466655 5.6382981011532 0.547639923340591
55.6778932623565 5.53191511811257 0.542448906438364
55.6981168780476 5.00000020290944 0.515710644057907
55.7183404937387 5.53191511811257 0.542448906438364
55.7385641094297 5.69148959267351 0.550217066626112
55.7587877251208 5.85106406723445 0.55787706953872
55.7790113408118 5.90425555875476 0.560407137255822
55.7992349565029 5.53191511811257 0.542448906438364
55.819458572194 5.58510660963288 0.545050594776606
55.839682187885 5.00000020290944 0.515710644057907
55.8599058035761 5.37234064355163 0.534567873881054
55.8801294192672 5.47872362659226 0.539834679625181
55.9003530349582 4.62765976226725 0.49613720380912
55.9205766506493 5.37234064355163 0.534567873881054
55.9408002663404 5.47872362659226 0.539834679625181
55.9610238820314 6.43617047395789 0.585106406723445
55.9812474977225 5.42553213507194 0.537207731288247
56.0014711134136 5.37234064355163 0.534567873881054
56.0216947291046 5.05319169442975 0.518446528742142
56.0419183447957 5.53191511811257 0.542448906438364
56.0621419604868 6.22340450787664 0.575353950284691
56.0823655761778 5.265957660511 0.529248658236749
56.1025891918689 5.69148959267351 0.550217066626112
56.12281280756 5.21276616899069 0.526568900976162
56.143036423251 5.53191511811257 0.542448906438364
56.1632600389421 4.94680871138912 0.512960167678218
56.1834836546332 5.10638318595006 0.521168051529382
56.2037072703242 6.54255345699852 0.5899221785364
56.2239308860153 6.22340450787664 0.575353950284691
56.2441545017064 6.70212793155946 0.59707301148151
56.2643781173974 5.95744705027507 0.562925833709398
56.2846017330885 5.79787257571413 0.555335475138186
56.3048253487796 5.31914915203132 0.531914915203132
56.3250489644706 6.38297898243758 0.582683595460406
56.3452725801617 6.38297898243758 0.582683595460406
56.3654961958528 5.74468108419382 0.552782195061309
56.3857198115438 5.05319169442975 0.518446528742142
56.4059434272349 5.53191511811257 0.542448906438364
56.426167042926 6.48936196547821 0.587519226884514
56.446390658617 5.58510660963288 0.545050594776606
56.4666142743081 5.42553213507194 0.537207731288247
56.4868378899992 5.31914915203132 0.531914915203132
56.5070615056902 5.265957660511 0.529248658236749
56.5272851213813 6.0638300333157 0.567929717304644
56.5475087370723 6.38297898243758 0.582683595460406
56.5677323527634 5.69148959267351 0.550217066626112
56.5879559684545 4.89361721986881 0.510194863610278
56.6081795841455 6.8617024061204 0.604139210240542
56.6284031998366 6.32978749091727 0.580250667943183
56.6486268155277 5.85106406723445 0.55787706953872
56.6688504312187 6.0638300333157 0.567929717304644
56.6890740469098 6.70212793155946 0.59707301148151
56.7092976626009 5.95744705027507 0.562925833709398
56.7295212782919 6.11702152483601 0.570415198401908
56.749744893983 6.32978749091727 0.580250667943183
56.7699685096741 5.79787257571413 0.555335475138186
56.7901921253651 5.21276616899069 0.526568900976162
56.8104157410562 7.12765986372196 0.615736030455294
56.8306393567473 7.55319179588447 0.633849775074574
56.8508629724383 6.54255345699852 0.5899221785364
56.8710865881294 7.12765986372196 0.615736030455294
56.8913102038205 7.02127688068134 0.611123710602471
56.9115338195115 6.96808538916102 0.608804447167049
56.9317574352026 6.48936196547821 0.587519226884514
56.9519810508937 7.50000030436416 0.631613966431975
56.9722046665847 7.02127688068134 0.611123710602471
56.9924282822758 7.23404284676259 0.620314056540036
57.0126518979669 6.8617024061204 0.604139210240542
57.0328755136579 7.18085135524228 0.618029282454318
57.053099129349 7.60638328740478 0.636077724914372
57.0733227450401 7.34042582980322 0.624858542617019
57.0935463607311 7.87234074500635 0.647102423100873
57.1137699764222 6.11702152483601 0.570415198401908
57.1339935921133 7.23404284676259 0.620314056540036
57.1542172078043 7.81914925348604 0.64491256090486
57.1744408234954 6.59574494851883 0.59231538178515
57.1946644391865 6.70212793155946 0.59707301148151
57.2148880548775 7.02127688068134 0.611123710602471
57.2351116705686 7.02127688068134 0.611123710602471
57.2553352862597 6.54255345699852 0.5899221785364
57.2755589019507 5.53191511811257 0.542448906438364
57.2957825176418 6.91489389764071 0.606476314558303
57.3160061333328 6.17021301635633 0.572889896348368
57.3362297490239 5.79787257571413 0.555335475138186
57.356453364715 6.43617047395789 0.585106406723445
57.376676980406 6.96808538916102 0.608804447167049
57.3969005960971 5.21276616899069 0.526568900976162
57.4171242117882 5.85106406723445 0.55787706953872
57.4373478274792 5.42553213507194 0.537207731288247
57.4575714431703 5.58510660963288 0.545050594776606
57.4777950588614 5.69148959267351 0.550217066626112
57.4980186745524 6.32978749091727 0.580250667943183
57.5182422902435 5.95744705027507 0.562925833709398
57.5384659059346 5.37234064355163 0.534567873881054
57.5586895216256 6.70212793155946 0.59707301148151
57.5789131373167 5.58510660963288 0.545050594776606
57.5991367530078 6.11702152483601 0.570415198401908
57.6193603686988 6.01063854179539 0.565433310857768
57.6395839843899 5.53191511811257 0.542448906438364
57.659807600081 5.37234064355163 0.534567873881054
57.680031215772 6.64893644003915 0.594698954320119
57.7002548314631 5.15957467747038 0.523875436249008
57.7204784471542 6.70212793155946 0.59707301148151
57.7407020628452 5.74468108419382 0.552782195061309
57.7609256785363 6.11702152483601 0.570415198401908
57.7811492942274 5.37234064355163 0.534567873881054
57.8013729099184 6.17021301635633 0.572889896348368
57.8215965256095 7.39361732132353 0.62711843622367
57.8418201413006 4.89361721986881 0.510194863610278
57.8620437569916 4.94680871138912 0.512960167678218
57.8822673726827 5.74468108419382 0.552782195061309
57.9024909883738 5.21276616899069 0.526568900976162
57.9227146040648 5.74468108419382 0.552782195061309
57.9429382197559 6.17021301635633 0.572889896348368
57.963161835447 5.47872362659226 0.539834679625181
57.983385451138 5.31914915203132 0.531914915203132
58.0036090668291 5.42553213507194 0.537207731288247
58.0238326825202 5.05319169442975 0.518446528742142
58.0440562982112 5.74468108419382 0.552782195061309
58.0642799139023 5.15957467747038 0.523875436249008
58.0845035295933 5.00000020290944 0.515710644057907
58.1047271452844 6.75531942307977 0.599437666325494
58.1249507609755 5.69148959267351 0.550217066626112
58.1451743766665 6.59574494851883 0.59231538178515
58.1653979923576 4.94680871138912 0.512960167678218
58.1856216080487 5.69148959267351 0.550217066626112
58.2058452237397 5.69148959267351 0.550217066626112
58.2260688394308 5.69148959267351 0.550217066626112
58.2462924551219 5.21276616899069 0.526568900976162
58.2665160708129 5.47872362659226 0.539834679625181
58.286739686504 4.94680871138912 0.512960167678218
58.3069633021951 5.85106406723445 0.55787706953872
58.3271869178861 6.01063854179539 0.565433310857768
58.3474105335772 4.89361721986881 0.510194863610278
58.3676341492683 5.21276616899069 0.526568900976162
58.3878577649593 4.57446827074693 0.493277599565779
58.4080813806504 5.21276616899069 0.526568900976162
58.4283049963415 5.10638318595006 0.521168051529382
58.4485286120325 5.47872362659226 0.539834679625181
58.4687522277236 4.46808528770631 0.487508072438874
58.4889758434147 4.52127677922662 0.490401320821245
58.5091994591057 5.15957467747038 0.523875436249008
58.5294230747968 5.10638318595006 0.521168051529382
58.5496466904879 5.6382981011532 0.547639923340591
58.5698703061789 5.37234064355163 0.534567873881054
58.59009392187 5.31914915203132 0.531914915203132
58.6103175375611 5.69148959267351 0.550217066626112
58.6305411532521 5.69148959267351 0.550217066626112
58.6507647689432 5.10638318595006 0.521168051529382
58.6709883846343 5.47872362659226 0.539834679625181
58.6912120003253 4.46808528770631 0.487508072438874
58.7114356160164 5.15957467747038 0.523875436249008
58.7316592317075 5.15957467747038 0.523875436249008
58.7518828473985 5.90425555875476 0.560407137255822
58.7721064630896 4.78723423682818 0.504618796037166
58.7923300787807 5.85106406723445 0.55787706953872
58.8125536944717 4.89361721986881 0.510194863610278
58.8327773101628 4.73404274530787 0.501807527388583
58.8530009258538 5.85106406723445 0.55787706953872
58.8732245415449 5.37234064355163 0.534567873881054
58.893448157236 5.74468108419382 0.552782195061309
58.913671772927 5.47872362659226 0.539834679625181
58.9338953886181 4.62765976226725 0.49613720380912
58.9541190043092 6.22340450787664 0.575353950284691
58.9743426200002 5.79787257571413 0.555335475138186
58.9945662356913 5.53191511811257 0.542448906438364
59.0147898513824 5.95744705027507 0.562925833709398
59.0350134670734 6.0638300333157 0.567929717304644
59.0552370827645 5.69148959267351 0.550217066626112
59.0754606984556 4.89361721986881 0.510194863610278
59.0956843141466 5.15957467747038 0.523875436249008
59.1159079298377 4.46808528770631 0.487508072438874
59.1361315455288 5.79787257571413 0.555335475138186
59.1563551612198 4.89361721986881 0.510194863610278
59.1765787769109 6.0638300333157 0.567929717304644
59.196802392602 4.8404257283485 0.507414489430638
59.217026008293 6.38297898243758 0.582683595460406
59.2372496239841 5.53191511811257 0.542448906438364
59.2574732396752 6.38297898243758 0.582683595460406
59.2776968553662 5.47872362659226 0.539834679625181
59.2979204710573 4.62765976226725 0.49613720380912
59.3181440867484 4.57446827074693 0.493277599565779
59.3383677024394 4.73404274530787 0.501807527388583
59.3585913181305 5.69148959267351 0.550217066626112
59.3788149338216 5.74468108419382 0.552782195061309
59.3990385495126 5.05319169442975 0.518446528742142
59.4192621652037 4.89361721986881 0.510194863610278
59.4394857808948 5.00000020290944 0.515710644057907
59.4597093965858 5.95744705027507 0.562925833709398
59.4799330122769 4.57446827074693 0.493277599565779
59.500156627968 5.47872362659226 0.539834679625181
59.520380243659 5.00000020290944 0.515710644057907
59.5406038593501 4.94680871138912 0.512960167678218
59.5608274750412 4.94680871138912 0.512960167678218
59.5810510907322 5.53191511811257 0.542448906438364
59.6012747064233 5.42553213507194 0.537207731288247
59.6214983221143 6.54255345699852 0.5899221785364
59.6417219378054 4.94680871138912 0.512960167678218
59.6619455534965 4.41489379618599 0.48459755047143
59.6821691691875 5.00000020290944 0.515710644057907
59.7023927848786 5.58510660963288 0.545050594776606
59.7226164005697 4.46808528770631 0.487508072438874
59.7428400162607 4.36170230466568 0.481669441788406
59.7630636319518 5.90425555875476 0.560407137255822
59.7832872476429 5.05319169442975 0.518446528742142
59.8035108633339 5.37234064355163 0.534567873881054
59.823734479025 4.68085125378756 0.498980420230782
59.8439580947161 5.79787257571413 0.555335475138186
59.8641817104071 5.21276616899069 0.526568900976162
59.8844053260982 4.94680871138912 0.512960167678218
59.9046289417893 5.00000020290944 0.515710644057907
59.9248525574803 5.53191511811257 0.542448906438364
59.9450761731714 6.11702152483601 0.570415198401908
59.9652997888625 4.57446827074693 0.493277599565779
59.9855234045535 5.15957467747038 0.523875436249008
60.0057470202446 6.22340450787664 0.575353950284691
60.0259706359357 5.265957660511 0.529248658236749
60.0461942516267 5.58510660963288 0.545050594776606
60.0664178673178 5.21276616899069 0.526568900976162
60.0866414830089 5.58510660963288 0.545050594776606
60.1068650986999 4.0425533555438 0.463712672386492
60.127088714391 5.00000020290944 0.515710644057907
60.1473123300821 4.73404274530787 0.501807527388583
60.1675359457731 4.94680871138912 0.512960167678218
60.1877595614642 5.42553213507194 0.537207731288247
60.2079831771553 5.05319169442975 0.518446528742142
60.2282067928463 5.47872362659226 0.539834679625181
60.2484304085374 5.47872362659226 0.539834679625181
60.2686540242285 4.94680871138912 0.512960167678218
60.2888776399195 5.42553213507194 0.537207731288247
60.3091012556106 4.68085125378756 0.498980420230782
60.3293248713017 4.73404274530787 0.501807527388583
60.3495484869927 5.31914915203132 0.531914915203132
60.3697721026838 5.95744705027507 0.562925833709398
60.3899957183748 5.265957660511 0.529248658236749
60.4102193340659 4.89361721986881 0.510194863610278
60.430442949757 5.69148959267351 0.550217066626112
60.450666565448 4.52127677922662 0.490401320821245
60.4708901811391 4.78723423682818 0.504618796037166
60.4911137968302 5.00000020290944 0.515710644057907
60.5113374125212 4.57446827074693 0.493277599565779
60.5315610282123 4.20212783010474 0.472776317979537
60.5517846439034 4.57446827074693 0.493277599565779
60.5720082595944 5.10638318595006 0.521168051529382
60.5922318752855 4.89361721986881 0.510194863610278
60.6124554909766 4.78723423682818 0.504618796037166
60.6326791066676 4.62765976226725 0.49613720380912
60.6529027223587 5.74468108419382 0.552782195061309
60.6731263380498 5.69148959267351 0.550217066626112
60.6933499537408 5.31914915203132 0.531914915203132
60.7135735694319 4.8404257283485 0.507414489430638
60.733797185123 6.01063854179539 0.565433310857768
60.754020800814 5.10638318595006 0.521168051529382
60.7742444165051 6.0638300333157 0.567929717304644
60.7944680321962 5.10638318595006 0.521168051529382
60.8146916478872 5.79787257571413 0.555335475138186
60.8349152635783 5.10638318595006 0.521168051529382
60.8551388792694 6.11702152483601 0.570415198401908
60.8753624949604 5.15957467747038 0.523875436249008
60.8955861106515 5.47872362659226 0.539834679625181
60.9158097263426 4.68085125378756 0.498980420230782
60.9360333420336 5.53191511811257 0.542448906438364
60.9562569577247 5.53191511811257 0.542448906438364
60.9764805734158 5.90425555875476 0.560407137255822
60.9967041891068 5.37234064355163 0.534567873881054
61.0169278047979 4.94680871138912 0.512960167678218
61.037151420489 5.58510660963288 0.545050594776606
61.05737503618 4.89361721986881 0.510194863610278
61.0775986518711 5.42553213507194 0.537207731288247
61.0978222675622 5.42553213507194 0.537207731288247
61.1180458832532 5.05319169442975 0.518446528742142
61.1382694989443 4.62765976226725 0.49613720380912
61.1584931146353 5.21276616899069 0.526568900976162
61.1787167303264 5.05319169442975 0.518446528742142
61.1989403460175 4.09574484706411 0.466753443803018
61.2191639617085 4.68085125378756 0.498980420230782
61.2393875773996 4.68085125378756 0.498980420230782
61.2596111930907 6.11702152483601 0.570415198401908
61.2798348087817 4.52127677922662 0.490401320821245
61.3000584244728 5.37234064355163 0.534567873881054
61.3202820401639 6.11702152483601 0.570415198401908
61.3405056558549 4.68085125378756 0.498980420230782
61.360729271546 4.62765976226725 0.49613720380912
61.3809528872371 5.265957660511 0.529248658236749
61.4011765029281 5.6382981011532 0.547639923340591
61.4214001186192 4.14893633858443 0.469774533230711
61.4416237343103 5.95744705027507 0.562925833709398
61.4618473500013 5.53191511811257 0.542448906438364
61.4820709656924 5.00000020290944 0.515710644057907
61.5022945813835 5.05319169442975 0.518446528742142
61.5225181970745 4.78723423682818 0.504618796037166
61.5427418127656 5.10638318595006 0.521168051529382
61.5629654284567 4.94680871138912 0.512960167678218
61.5831890441477 5.74468108419382 0.552782195061309
61.6034126598388 4.8404257283485 0.507414489430638
61.6236362755299 5.42553213507194 0.537207731288247
61.6438598912209 5.05319169442975 0.518446528742142
61.664083506912 5.37234064355163 0.534567873881054
61.6843071226031 4.73404274530787 0.501807527388583
61.7045307382941 5.00000020290944 0.515710644057907
61.7247543539852 4.57446827074693 0.493277599565779
61.7449779696763 5.42553213507194 0.537207731288247
61.7652015853673 6.48936196547821 0.587519226884514
61.7854252010584 4.41489379618599 0.48459755047143
61.8056488167495 4.94680871138912 0.512960167678218
61.8258724324405 4.89361721986881 0.510194863610278
61.8460960481316 5.00000020290944 0.515710644057907
61.8663196638227 5.37234064355163 0.534567873881054
61.8865432795137 5.10638318595006 0.521168051529382
61.9067668952048 5.31914915203132 0.531914915203132
61.9269905108958 4.73404274530787 0.501807527388583
61.9472141265869 5.31914915203132 0.531914915203132
61.967437742278 5.265957660511 0.529248658236749
61.987661357969 5.47872362659226 0.539834679625181
62.0078849736601 3.88297888098286 0.454468302768581
62.0281085893512 5.37234064355163 0.534567873881054
62.0483322050422 4.89361721986881 0.510194863610278
62.0685558207333 4.30851081314537 0.478723423682818
62.0887794364244 5.74468108419382 0.552782195061309
62.1090030521154 5.05319169442975 0.518446528742142
62.1292266678065 5.58510660963288 0.545050594776606
62.1494502834976 4.78723423682818 0.504618796037166
62.1696738991886 5.05319169442975 0.518446528742142
62.1898975148797 5.74468108419382 0.552782195061309
62.2101211305708 5.42553213507194 0.537207731288247
62.2303447462618 5.42553213507194 0.537207731288247
62.2505683619529 5.58510660963288 0.545050594776606
62.270791977644 5.85106406723445 0.55787706953872
62.291015593335 6.43617047395789 0.585106406723445
62.3112392090261 6.27659599939695 0.5778074963847
62.3314628247172 6.0638300333157 0.567929717304644
62.3516864404082 5.53191511811257 0.542448906438364
62.3719100560993 5.47872362659226 0.539834679625181
62.3921336717904 5.6382981011532 0.547639923340591
62.4123572874814 6.43617047395789 0.585106406723445
62.4325809031725 5.95744705027507 0.562925833709398
62.4528045188636 6.54255345699852 0.5899221785364
62.4730281345546 5.79787257571413 0.555335475138186
62.4932517502457 6.22340450787664 0.575353950284691
62.5134753659368 6.54255345699852 0.5899221785364
62.5336989816278 6.38297898243758 0.582683595460406
62.5539225973189 6.80851091460008 0.601793029687043
62.57414621301 6.80851091460008 0.601793029687043
62.594369828701 7.2872343382829 0.622590446048853
62.6145934443921 6.70212793155946 0.59707301148151
62.6348170600832 7.02127688068134 0.611123710602471
62.6550406757742 6.11702152483601 0.570415198401908
62.6752642914653 6.8617024061204 0.604139210240542
62.6954879071563 7.12765986372196 0.615736030455294
62.7157115228474 6.48936196547821 0.587519226884514
62.7359351385385 6.80851091460008 0.601793029687043
62.7561587542295 6.91489389764071 0.606476314558303
62.7763823699206 6.91489389764071 0.606476314558303
62.7966059856117 5.74468108419382 0.552782195061309
62.8168296013027 6.91489389764071 0.606476314558303
62.8370532169938 6.0638300333157 0.567929717304644
62.8572768326849 6.48936196547821 0.587519226884514
62.8775004483759 6.43617047395789 0.585106406723445
62.897724064067 6.17021301635633 0.572889896348368
62.9179476797581 6.70212793155946 0.59707301148151
62.9381712954491 6.8617024061204 0.604139210240542
62.9583949111402 6.48936196547821 0.587519226884514
62.9786185268313 5.74468108419382 0.552782195061309
62.9988421425223 5.21276616899069 0.526568900976162
63.0190657582134 5.79787257571413 0.555335475138186
63.0392893739045 4.20212783010474 0.472776317979537
63.0595129895955 4.73404274530787 0.501807527388583
63.0797366052866 5.265957660511 0.529248658236749
63.0999602209777 5.95744705027507 0.562925833709398
63.1201838366687 4.57446827074693 0.493277599565779
63.1404074523598 5.79787257571413 0.555335475138186
63.1606310680509 4.78723423682818 0.504618796037166
63.1808546837419 5.15957467747038 0.523875436249008
63.201078299433 4.68085125378756 0.498980420230782
63.2213019151241 4.68085125378756 0.498980420230782
63.2415255308151 5.265957660511 0.529248658236749
63.2617491465062 4.78723423682818 0.504618796037166
63.2819727621973 5.37234064355163 0.534567873881054
63.3021963778883 4.8404257283485 0.507414489430638
63.3224199935794 6.17021301635633 0.572889896348368
63.3426436092705 4.78723423682818 0.504618796037166
63.3628672249615 5.21276616899069 0.526568900976162
63.3830908406526 4.89361721986881 0.510194863610278
63.4033144563437 5.10638318595006 0.521168051529382
63.4235380720347 4.94680871138912 0.512960167678218
63.4437616877258 6.32978749091727 0.580250667943183
63.4639853034168 5.47872362659226 0.539834679625181
63.4842089191079 5.85106406723445 0.55787706953872
63.504432534799 4.73404274530787 0.501807527388583
63.52465615049 4.36170230466568 0.481669441788406
63.5448797661811 4.68085125378756 0.498980420230782
63.5651033818722 5.58510660963288 0.545050594776606
63.5853269975632 4.68085125378756 0.498980420230782
63.6055506132543 5.265957660511 0.529248658236749
63.6257742289454 5.21276616899069 0.526568900976162
63.6459978446364 6.27659599939695 0.5778074963847
63.6662214603275 4.68085125378756 0.498980420230782
63.6864450760186 5.15957467747038 0.523875436249008
63.7066686917096 5.31914915203132 0.531914915203132
63.7268923074007 4.8404257283485 0.507414489430638
63.7471159230918 4.52127677922662 0.490401320821245
63.7673395387828 5.05319169442975 0.518446528742142
63.7875631544739 5.00000020290944 0.515710644057907
63.807786770165 4.68085125378756 0.498980420230782
63.828010385856 4.62765976226725 0.49613720380912
63.8482340015471 5.05319169442975 0.518446528742142
63.8684576172382 5.74468108419382 0.552782195061309
63.8886812329292 6.38297898243758 0.582683595460406
63.9089048486203 4.78723423682818 0.504618796037166
63.9291284643114 5.85106406723445 0.55787706953872
63.9493520800024 4.52127677922662 0.490401320821245
63.9695756956935 4.68085125378756 0.498980420230782
63.9897993113846 5.05319169442975 0.518446528742142
64.0100229270756 4.52127677922662 0.490401320821245
64.0302465427667 5.79787257571413 0.555335475138186
64.0504701584578 5.00000020290944 0.515710644057907
64.0706937741488 4.57446827074693 0.493277599565779
64.0909173898399 4.20212783010474 0.472776317979537
64.111141005531 4.94680871138912 0.512960167678218
64.131364621222 4.57446827074693 0.493277599565779
64.1515882369131 4.62765976226725 0.49613720380912
64.1718118526042 4.8404257283485 0.507414489430638
64.1920354682952 4.25531932162505 0.475759163456095
64.2122590839863 4.73404274530787 0.501807527388583
64.2324826996773 4.68085125378756 0.498980420230782
64.2527063153684 4.78723423682818 0.504618796037166
64.2729299310595 4.41489379618599 0.48459755047143
64.2931535467505 4.41489379618599 0.48459755047143
64.3133771624416 4.73404274530787 0.501807527388583
64.3336007781327 4.89361721986881 0.510194863610278
64.3538243938237 3.72340440642192 0.445031947067723
64.3740480095148 5.05319169442975 0.518446528742142
64.3942716252059 4.36170230466568 0.481669441788406
64.4144952408969 5.53191511811257 0.542448906438364
64.434718856588 5.265957660511 0.529248658236749
64.4549424722791 5.58510660963288 0.545050594776606
64.4751660879701 4.8404257283485 0.507414489430638
64.4953897036612 4.8404257283485 0.507414489430638
64.5156133193523 4.20212783010474 0.472776317979537
64.5358369350433 4.57446827074693 0.493277599565779
64.5560605507344 4.14893633858443 0.469774533230711
64.5762841664255 5.15957467747038 0.523875436249008
64.5965077821165 4.94680871138912 0.512960167678218
64.6167313978076 4.57446827074693 0.493277599565779
64.6369550134987 3.72340440642192 0.445031947067723
64.6571786291897 5.05319169442975 0.518446528742142
64.6774022448808 5.00000020290944 0.515710644057907
64.6976258605719 4.57446827074693 0.493277599565779
64.7178494762629 4.62765976226725 0.49613720380912
64.738073091954 4.52127677922662 0.490401320821245
64.7582967076451 5.00000020290944 0.515710644057907
64.7785203233361 5.15957467747038 0.523875436249008
64.7987439390272 4.73404274530787 0.501807527388583
64.8189675547183 4.78723423682818 0.504618796037166
64.8391911704093 5.05319169442975 0.518446528742142
64.8594147861004 5.21276616899069 0.526568900976162
64.8796384017915 5.31914915203132 0.531914915203132
64.8998620174825 4.89361721986881 0.510194863610278
64.9200856331736 4.09574484706411 0.466753443803018
64.9403092488647 5.74468108419382 0.552782195061309
64.9605328645557 3.82978738946255 0.451344772265282
64.9807564802468 4.78723423682818 0.504618796037166
65.0009800959378 4.36170230466568 0.481669441788406
65.0212037116289 3.98936186402349 0.460651829217758
65.04142732732 5.37234064355163 0.534567873881054
65.061650943011 3.82978738946255 0.451344772265282
65.0818745587021 5.47872362659226 0.539834679625181
65.1020981743932 4.14893633858443 0.469774533230711
65.1223217900842 3.72340440642192 0.445031947067723
65.1425454057753 5.00000020290944 0.515710644057907
65.1627690214664 4.8404257283485 0.507414489430638
65.1829926371574 4.14893633858443 0.469774533230711
65.2032162528485 4.52127677922662 0.490401320821245
65.2234398685396 3.82978738946255 0.451344772265282
65.2436634842306 5.10638318595006 0.521168051529382
65.2638870999217 4.68085125378756 0.498980420230782
65.2841107156128 4.89361721986881 0.510194863610278
65.3043343313038 4.46808528770631 0.487508072438874
65.3245579469949 4.8404257283485 0.507414489430638
65.344781562686 4.41489379618599 0.48459755047143
65.365005178377 4.78723423682818 0.504618796037166
65.3852287940681 5.05319169442975 0.518446528742142
65.4054524097592 4.68085125378756 0.498980420230782
65.4256760254502 5.05319169442975 0.518446528742142
65.4458996411413 3.72340440642192 0.445031947067723
65.4661232568324 4.78723423682818 0.504618796037166
65.4863468725234 5.79787257571413 0.555335475138186
65.5065704882145 4.36170230466568 0.481669441788406
65.5267941039056 4.89361721986881 0.510194863610278
65.5470177195966 4.41489379618599 0.48459755047143
65.5672413352877 4.73404274530787 0.501807527388583
65.5874649509788 5.15957467747038 0.523875436249008
65.6076885666698 3.98936186402349 0.460651829217758
65.6279121823609 3.98936186402349 0.460651829217758
65.648135798052 4.8404257283485 0.507414489430638
65.668359413743 5.05319169442975 0.518446528742142
65.6885830294341 4.62765976226725 0.49613720380912
65.7088066451252 5.69148959267351 0.550217066626112
65.7290302608162 4.62765976226725 0.49613720380912
65.7492538765073 4.52127677922662 0.490401320821245
65.7694774921983 4.78723423682818 0.504618796037166
65.7897011078894 4.14893633858443 0.469774533230711
65.8099247235805 4.41489379618599 0.48459755047143
65.8301483392715 4.09574484706411 0.466753443803018
65.8503719549626 4.73404274530787 0.501807527388583
65.8705955706537 5.10638318595006 0.521168051529382
65.8908191863447 3.93617037250317 0.457570511496874
65.9110428020358 5.42553213507194 0.537207731288247
65.9312664177269 4.89361721986881 0.510194863610278
65.9514900334179 5.15957467747038 0.523875436249008
65.971713649109 5.58510660963288 0.545050594776606
65.9919372648001 4.30851081314537 0.478723423682818
66.0121608804911 4.46808528770631 0.487508072438874
66.0323844961822 3.88297888098286 0.454468302768581
66.0526081118733 4.94680871138912 0.512960167678218
66.0728317275643 4.52127677922662 0.490401320821245
66.0930553432554 4.62765976226725 0.49613720380912
66.1132789589465 4.62765976226725 0.49613720380912
66.1335025746375 3.93617037250317 0.457570511496874
66.1537261903286 5.58510660963288 0.545050594776606
66.1739498060197 4.25531932162505 0.475759163456095
66.1941734217107 3.88297888098286 0.454468302768581
66.2143970374018 4.30851081314537 0.478723423682818
66.2346206530929 4.36170230466568 0.481669441788406
66.2548442687839 5.85106406723445 0.55787706953872
66.275067884475 4.8404257283485 0.507414489430638
66.2952915001661 4.41489379618599 0.48459755047143
66.3155151158571 4.41489379618599 0.48459755047143
66.3357387315482 4.30851081314537 0.478723423682818
66.3559623472393 4.52127677922662 0.490401320821245
66.3761859629303 4.8404257283485 0.507414489430638
66.3964095786214 5.21276616899069 0.526568900976162
66.4166331943125 4.62765976226725 0.49613720380912
66.4368568100035 4.52127677922662 0.490401320821245
66.4570804256946 4.62765976226725 0.49613720380912
66.4773040413857 4.30851081314537 0.478723423682818
66.4975276570767 4.52127677922662 0.490401320821245
66.5177512727678 4.73404274530787 0.501807527388583
66.5379748884588 3.88297888098286 0.454468302768581
66.5581985041499 4.89361721986881 0.510194863610278
66.578422119841 5.31914915203132 0.531914915203132
66.598645735532 4.14893633858443 0.469774533230711
66.6188693512231 3.98936186402349 0.460651829217758
66.6390929669142 4.41489379618599 0.48459755047143
66.6593165826052 4.36170230466568 0.481669441788406
66.6795401982963 4.14893633858443 0.469774533230711
66.6997638139874 4.78723423682818 0.504618796037166
66.7199874296784 3.72340440642192 0.445031947067723
66.7402110453695 5.69148959267351 0.550217066626112
66.7604346610606 4.30851081314537 0.478723423682818
66.7806582767516 4.09574484706411 0.466753443803018
66.8008818924427 4.14893633858443 0.469774533230711
66.8211055081338 4.14893633858443 0.469774533230711
66.8413291238248 4.41489379618599 0.48459755047143
66.8615527395159 4.30851081314537 0.478723423682818
66.881776355207 4.25531932162505 0.475759163456095
66.901999970898 4.68085125378756 0.498980420230782
66.9222235865891 3.56382993186098 0.435391122555825
66.9424472022802 3.67021291490161 0.441841712766838
66.9626708179712 4.30851081314537 0.478723423682818
66.9828944336623 4.94680871138912 0.512960167678218
67.0031180493534 4.52127677922662 0.490401320821245
67.0233416650444 5.00000020290944 0.515710644057907
67.0435652807355 3.77659589794223 0.448199474208799
67.0637888964266 4.73404274530787 0.501807527388583
67.0840125121176 4.57446827074693 0.493277599565779
67.1042361278087 4.36170230466568 0.481669441788406
67.1244597434998 5.15957467747038 0.523875436249008
67.1446833591908 3.93617037250317 0.457570511496874
67.1649069748819 4.14893633858443 0.469774533230711
67.185130590573 3.6170214233813 0.438628275844795
67.205354206264 4.41489379618599 0.48459755047143
67.2255778219551 4.36170230466568 0.481669441788406
67.2458014376462 3.72340440642192 0.445031947067723
67.2660250533372 4.14893633858443 0.469774533230711
67.2862486690283 4.30851081314537 0.478723423682818
67.3064722847193 4.46808528770631 0.487508072438874
67.3266959004104 4.30851081314537 0.478723423682818
67.3469195161015 4.94680871138912 0.512960167678218
67.3671431317925 4.14893633858443 0.469774533230711
67.3873667474836 5.21276616899069 0.526568900976162
67.4075903631747 3.98936186402349 0.460651829217758
67.4278139788657 3.67021291490161 0.441841712766838
67.4480375945568 4.25531932162505 0.475759163456095
67.4682612102479 4.0425533555438 0.463712672386492
67.4884848259389 4.8404257283485 0.507414489430638
67.50870844163 3.82978738946255 0.451344772265282
67.5289320573211 4.14893633858443 0.469774533230711
67.5491556730121 3.88297888098286 0.454468302768581
67.5693792887032 4.73404274530787 0.501807527388583
67.5896029043943 4.94680871138912 0.512960167678218
67.6098265200853 5.00000020290944 0.515710644057907
67.6300501357764 4.20212783010474 0.472776317979537
67.6502737514675 5.37234064355163 0.534567873881054
67.6704973671585 3.88297888098286 0.454468302768581
67.6907209828496 4.52127677922662 0.490401320821245
67.7109445985407 4.52127677922662 0.490401320821245
67.7311682142317 3.56382993186098 0.435391122555825
67.7513918299228 3.98936186402349 0.460651829217758
67.7716154456139 4.20212783010474 0.472776317979537
67.7918390613049 5.265957660511 0.529248658236749
67.812062676996 3.93617037250317 0.457570511496874
67.8322862926871 4.20212783010474 0.472776317979537
67.8525099083781 4.57446827074693 0.493277599565779
67.8727335240692 4.68085125378756 0.498980420230782
67.8929571397603 4.94680871138912 0.512960167678218
67.9131807554513 3.56382993186098 0.435391122555825
67.9334043711424 4.46808528770631 0.487508072438874
67.9536279868335 4.30851081314537 0.478723423682818
67.9738516025245 3.6170214233813 0.438628275844795
67.9940752182156 4.30851081314537 0.478723423682818
68.0142988339067 4.20212783010474 0.472776317979537
68.0345224495977 4.30851081314537 0.478723423682818
68.0547460652888 4.14893633858443 0.469774533230711
68.0749696809798 4.09574484706411 0.466753443803018
68.0951932966709 4.36170230466568 0.481669441788406
68.115416912362 5.21276616899069 0.526568900976162
68.135640528053 4.30851081314537 0.478723423682818
68.1558641437441 3.93617037250317 0.457570511496874
68.1760877594352 4.52127677922662 0.490401320821245
68.1963113751262 4.57446827074693 0.493277599565779
68.2165349908173 3.82978738946255 0.451344772265282
68.2367586065084 3.82978738946255 0.451344772265282
68.2569822221994 4.52127677922662 0.490401320821245
68.2772058378905 4.46808528770631 0.487508072438874
68.2974294535816 4.09574484706411 0.466753443803018
68.3176530692726 4.41489379618599 0.48459755047143
68.3378766849637 4.36170230466568 0.481669441788406
68.3581003006548 4.68085125378756 0.498980420230782
68.3783239163458 4.36170230466568 0.481669441788406
68.3985475320369 3.82978738946255 0.451344772265282
68.418771147728 3.88297888098286 0.454468302768581
68.438994763419 4.62765976226725 0.49613720380912
68.4592183791101 3.98936186402349 0.460651829217758
68.4794419948012 4.14893633858443 0.469774533230711
68.4996656104922 4.20212783010474 0.472776317979537
68.5198892261833 4.0425533555438 0.463712672386492
68.5401128418744 3.77659589794223 0.448199474208799
68.5603364575654 4.36170230466568 0.481669441788406
68.5805600732565 4.25531932162505 0.475759163456095
68.6007836889476 3.6170214233813 0.438628275844795
68.6210073046386 3.98936186402349 0.460651829217758
68.6412309203297 3.45744694882036 0.428843514653201
68.6614545360208 4.09574484706411 0.466753443803018
68.6816781517118 5.265957660511 0.529248658236749
68.7019017674029 4.73404274530787 0.501807527388583
68.722125383094 4.62765976226725 0.49613720380912
68.742348998785 4.20212783010474 0.472776317979537
68.7625726144761 3.88297888098286 0.454468302768581
68.7827962301672 3.67021291490161 0.441841712766838
68.8030198458582 3.98936186402349 0.460651829217758
68.8232434615493 4.46808528770631 0.487508072438874
68.8434670772403 4.41489379618599 0.48459755047143
68.8636906929314 4.46808528770631 0.487508072438874
68.8839143086225 4.36170230466568 0.481669441788406
68.9041379243135 4.09574484706411 0.466753443803018
68.9243615400046 4.78723423682818 0.504618796037166
68.9445851556957 4.57446827074693 0.493277599565779
68.9648087713867 3.6170214233813 0.438628275844795
68.9850323870778 4.14893633858443 0.469774533230711
69.0052560027689 4.57446827074693 0.493277599565779
69.0254796184599 4.20212783010474 0.472776317979537
69.045703234151 3.6170214233813 0.438628275844795
69.0659268498421 3.67021291490161 0.441841712766838
69.0861504655331 4.78723423682818 0.504618796037166
69.1063740812242 4.52127677922662 0.490401320821245
69.1265976969153 4.25531932162505 0.475759163456095
69.1468213126063 4.09574484706411 0.466753443803018
69.1670449282974 3.51063844034067 0.432129719910892
69.1872685439885 4.09574484706411 0.466753443803018
69.2074921596795 4.09574484706411 0.466753443803018
69.2277157753706 3.72340440642192 0.445031947067723
69.2479393910617 3.56382993186098 0.435391122555825
69.2681630067527 4.36170230466568 0.481669441788406
69.2883866224438 3.45744694882036 0.428843514653201
69.3086102381349 3.13829799969848 0.408571598914043
69.3288338538259 4.0425533555438 0.463712672386492
69.349057469517 3.72340440642192 0.445031947067723
69.3692810852081 4.20212783010474 0.472776317979537
69.3895047008991 4.0425533555438 0.463712672386492
69.4097283165902 4.41489379618599 0.48459755047143
69.4299519322813 4.62765976226725 0.49613720380912
69.4501755479723 3.98936186402349 0.460651829217758
69.4703991636634 3.88297888098286 0.454468302768581
69.4906227793545 3.93617037250317 0.457570511496874
69.5108463950455 3.45744694882036 0.428843514653201
69.5310700107366 4.0425533555438 0.463712672386492
69.5512936264277 3.77659589794223 0.448199474208799
69.5715172421187 4.20212783010474 0.472776317979537
69.5917408578098 4.25531932162505 0.475759163456095
69.6119644735008 3.56382993186098 0.435391122555825
69.6321880891919 4.09574484706411 0.466753443803018
69.652411704883 3.88297888098286 0.454468302768581
69.672635320574 4.68085125378756 0.498980420230782
69.6928589362651 4.20212783010474 0.472776317979537
69.7130825519562 3.98936186402349 0.460651829217758
69.7333061676472 3.88297888098286 0.454468302768581
69.7535297833383 4.30851081314537 0.478723423682818
69.7737533990294 3.51063844034067 0.432129719910892
69.7939770147204 4.09574484706411 0.466753443803018
69.8142006304115 3.98936186402349 0.460651829217758
69.8344242461026 4.36170230466568 0.481669441788406
69.8546478617936 4.20212783010474 0.472776317979537
69.8748714774847 3.2446809827391 0.415438829407517
69.8950950931758 5.42553213507194 0.537207731288247
69.9153187088668 4.30851081314537 0.478723423682818
69.9355423245579 4.68085125378756 0.498980420230782
69.955765940249 4.46808528770631 0.487508072438874
69.97598955594 4.89361721986881 0.510194863610278
69.9962131716311 4.52127677922662 0.490401320821245
70.0164367873222 3.72340440642192 0.445031947067723
70.0366604030132 4.68085125378756 0.498980420230782
70.0568840187043 3.29787247425942 0.418830223061378
70.0771076343954 3.82978738946255 0.451344772265282
70.0973312500864 4.78723423682818 0.504618796037166
70.1175548657775 4.30851081314537 0.478723423682818
70.1377784814686 4.57446827074693 0.493277599565779
70.1580020971596 3.35106396577973 0.422194375282049
70.1782257128507 3.51063844034067 0.432129719910892
70.1984493285418 3.40425545730004 0.425531932162505
70.2186729442328 3.88297888098286 0.454468302768581
70.2388965599239 3.93617037250317 0.457570511496874
70.259120175615 3.98936186402349 0.460651829217758
70.279343791306 4.09574484706411 0.466753443803018
70.2995674069971 3.72340440642192 0.445031947067723
70.3197910226882 4.52127677922662 0.490401320821245
70.3400146383792 4.0425533555438 0.463712672386492
70.3602382540703 4.78723423682818 0.504618796037166
70.3804618697613 3.19148949121879 0.412019521636212
70.4006854854524 3.6170214233813 0.438628275844795
70.4209091011435 4.09574484706411 0.466753443803018
70.4411327168345 4.0425533555438 0.463712672386492
70.4613563325256 4.0425533555438 0.463712672386492
70.4815799482167 4.30851081314537 0.478723423682818
70.5018035639077 3.72340440642192 0.445031947067723
70.5220271795988 3.72340440642192 0.445031947067723
70.5422507952899 3.67021291490161 0.441841712766838
70.5624744109809 3.6170214233813 0.438628275844795
70.582698026672 3.6170214233813 0.438628275844795
70.6029216423631 3.82978738946255 0.451344772265282
70.6231452580541 3.98936186402349 0.460651829217758
70.6433688737452 4.41489379618599 0.48459755047143
70.6635924894363 3.88297888098286 0.454468302768581
70.6838161051273 4.0425533555438 0.463712672386492
70.7040397208184 3.82978738946255 0.451344772265282
70.7242633365095 4.89361721986881 0.510194863610278
70.7444869522005 3.88297888098286 0.454468302768581
70.7647105678916 3.77659589794223 0.448199474208799
70.7849341835827 5.10638318595006 0.521168051529382
70.8051577992737 4.25531932162505 0.475759163456095
70.8253814149648 4.25531932162505 0.475759163456095
70.8456050306559 3.51063844034067 0.432129719910892
70.8658286463469 3.6170214233813 0.438628275844795
70.886052262038 3.72340440642192 0.445031947067723
70.9062758777291 3.93617037250317 0.457570511496874
70.9264994934201 3.6170214233813 0.438628275844795
70.9467231091112 4.68085125378756 0.498980420230782
70.9669467248023 3.03191501665785 0.401586954343472
70.9871703404933 4.52127677922662 0.490401320821245
71.0073939561844 4.78723423682818 0.504618796037166
71.0276175718755 4.62765976226725 0.49613720380912
71.0478411875665 3.88297888098286 0.454468302768581
71.0680648032576 4.25531932162505 0.475759163456095
71.0882884189487 3.82978738946255 0.451344772265282
71.1085120346397 3.88297888098286 0.454468302768581
71.1287356503308 3.56382993186098 0.435391122555825
71.1489592660218 3.03191501665785 0.401586954343472
71.1691828817129 4.62765976226725 0.49613720380912
71.189406497404 3.19148949121879 0.412019521636212
71.209630113095 4.20212783010474 0.472776317979537
71.2298537287861 4.0425533555438 0.463712672386492
71.2500773444772 4.57446827074693 0.493277599565779
71.2703009601682 3.93617037250317 0.457570511496874
71.2905245758593 4.52127677922662 0.490401320821245
71.3107481915504 3.72340440642192 0.445031947067723
71.3309718072414 3.77659589794223 0.448199474208799
71.3511954229325 3.77659589794223 0.448199474208799
71.3714190386236 3.08510650817816 0.405094330581189
71.3916426543146 3.98936186402349 0.460651829217758
71.4118662700057 3.82978738946255 0.451344772265282
71.4320898856968 4.36170230466568 0.481669441788406
71.4523135013878 3.45744694882036 0.428843514653201
71.4725371170789 3.56382993186098 0.435391122555825
71.49276073277 3.98936186402349 0.460651829217758
71.512984348461 3.88297888098286 0.454468302768581
71.5332079641521 4.0425533555438 0.463712672386492
71.5534315798432 3.93617037250317 0.457570511496874
71.5736551955342 4.30851081314537 0.478723423682818
71.5938788112253 4.0425533555438 0.463712672386492
71.6141024269164 4.30851081314537 0.478723423682818
71.6343260426074 3.2446809827391 0.415438829407517
71.6545496582985 4.62765976226725 0.49613720380912
71.6747732739896 3.93617037250317 0.457570511496874
71.6949968896806 4.30851081314537 0.478723423682818
71.7152205053717 3.13829799969848 0.408571598914043
71.7354441210628 3.56382993186098 0.435391122555825
71.7556677367538 3.72340440642192 0.445031947067723
71.7758913524449 3.98936186402349 0.460651829217758
71.796114968136 3.19148949121879 0.412019521636212
71.816338583827 3.6170214233813 0.438628275844795
71.8365621995181 3.77659589794223 0.448199474208799
71.8567858152092 4.14893633858443 0.469774533230711
71.8770094309002 4.20212783010474 0.472776317979537
71.8972330465913 3.67021291490161 0.441841712766838
71.9174566622823 3.6170214233813 0.438628275844795
71.9376802779734 3.35106396577973 0.422194375282049
71.9579038936645 3.40425545730004 0.425531932162505
71.9781275093555 3.93617037250317 0.457570511496874
71.9983511250466 3.98936186402349 0.460651829217758
72.0185747407377 4.25531932162505 0.475759163456095
72.0387983564287 4.8404257283485 0.507414489430638
72.0590219721198 3.82978738946255 0.451344772265282
72.0792455878109 4.36170230466568 0.481669441788406
72.0994692035019 3.67021291490161 0.441841712766838
72.119692819193 4.68085125378756 0.498980420230782
72.1399164348841 3.51063844034067 0.432129719910892
72.1601400505751 3.77659589794223 0.448199474208799
72.1803636662662 3.67021291490161 0.441841712766838
72.2005872819573 3.40425545730004 0.425531932162505
72.2208108976483 3.67021291490161 0.441841712766838
72.2410345133394 4.14893633858443 0.469774533230711
72.2612581290305 3.93617037250317 0.457570511496874
72.2814817447215 4.36170230466568 0.481669441788406
72.3017053604126 3.67021291490161 0.441841712766838
72.3219289761037 3.56382993186098 0.435391122555825
72.3421525917947 3.45744694882036 0.428843514653201
72.3623762074858 3.77659589794223 0.448199474208799
72.3825998231769 3.56382993186098 0.435391122555825
72.4028234388679 3.67021291490161 0.441841712766838
72.423047054559 3.45744694882036 0.428843514653201
72.4432706702501 3.40425545730004 0.425531932162505
72.4634942859411 5.05319169442975 0.518446528742142
72.4837179016322 2.76595755905628 0.383569300189794
72.5039415173233 2.8191490505766 0.387239903442613
72.5241651330143 3.67021291490161 0.441841712766838
72.5443887487054 4.30851081314537 0.478723423682818
72.5646123643965 4.41489379618599 0.48459755047143
72.5848359800875 3.56382993186098 0.435391122555825
72.6050595957786 3.56382993186098 0.435391122555825
72.6252832114697 4.20212783010474 0.472776317979537
72.6455068271607 4.20212783010474 0.472776317979537
72.6657304428518 2.8191490505766 0.387239903442613
72.6859540585428 3.82978738946255 0.451344772265282
72.7061776742339 3.35106396577973 0.422194375282049
72.726401289925 4.46808528770631 0.487508072438874
72.746624905616 3.88297888098286 0.454468302768581
72.7668485213071 3.77659589794223 0.448199474208799
72.7870721369982 3.82978738946255 0.451344772265282
72.8072957526892 3.6170214233813 0.438628275844795
72.8275193683803 3.56382993186098 0.435391122555825
72.8477429840714 3.40425545730004 0.425531932162505
72.8679665997624 2.87234054209691 0.390876038647036
72.8881902154535 3.72340440642192 0.445031947067723
72.9084138311446 4.41489379618599 0.48459755047143
72.9286374468356 3.88297888098286 0.454468302768581
72.9488610625267 3.6170214233813 0.438628275844795
72.9690846782178 3.40425545730004 0.425531932162505
72.9893082939088 3.77659589794223 0.448199474208799
73.0095319095999 3.67021291490161 0.441841712766838
73.029755525291 3.03191501665785 0.401586954343472
73.049979140982 4.68085125378756 0.498980420230782
73.0702027566731 3.77659589794223 0.448199474208799
73.0904263723642 3.93617037250317 0.457570511496874
73.1106499880552 3.67021291490161 0.441841712766838
73.1308736037463 3.77659589794223 0.448199474208799
73.1510972194374 3.29787247425942 0.418830223061378
73.1713208351284 3.77659589794223 0.448199474208799
73.1915444508195 2.97872352513754 0.398048674321006
73.2117680665106 3.93617037250317 0.457570511496874
73.2319916822016 3.88297888098286 0.454468302768581
73.2522152978927 4.30851081314537 0.478723423682818
73.2724389135838 4.20212783010474 0.472776317979537
73.2926625292748 3.6170214233813 0.438628275844795
73.3128861449659 3.6170214233813 0.438628275844795
73.333109760657 3.77659589794223 0.448199474208799
73.353333376348 3.6170214233813 0.438628275844795
73.3735569920391 4.30851081314537 0.478723423682818
73.3937806077302 3.82978738946255 0.451344772265282
73.4140042234212 3.67021291490161 0.441841712766838
73.4342278391123 3.67021291490161 0.441841712766838
73.4544514548033 3.03191501665785 0.401586954343472
73.4746750704944 3.77659589794223 0.448199474208799
73.4948986861855 3.67021291490161 0.441841712766838
73.5151223018765 3.45744694882036 0.428843514653201
73.5353459175676 3.19148949121879 0.412019521636212
73.5555695332587 3.45744694882036 0.428843514653201
73.5757931489497 4.62765976226725 0.49613720380912
73.5960167646408 3.72340440642192 0.445031947067723
73.6162403803319 4.73404274530787 0.501807527388583
73.6364639960229 4.30851081314537 0.478723423682818
73.656687611714 4.14893633858443 0.469774533230711
73.6769112274051 3.6170214233813 0.438628275844795
73.6971348430961 3.03191501665785 0.401586954343472
73.7173584587872 4.14893633858443 0.469774533230711
73.7375820744783 3.19148949121879 0.412019521636212
73.7578056901693 4.25531932162505 0.475759163456095
73.7780293058604 3.98936186402349 0.460651829217758
73.7982529215515 3.82978738946255 0.451344772265282
73.8184765372425 3.13829799969848 0.408571598914043
73.8387001529336 3.82978738946255 0.451344772265282
73.8589237686247 4.30851081314537 0.478723423682818
73.8791473843157 3.6170214233813 0.438628275844795
73.8993710000068 3.67021291490161 0.441841712766838
73.9195946156979 4.09574484706411 0.466753443803018
73.9398182313889 4.36170230466568 0.481669441788406
73.96004184708 4.09574484706411 0.466753443803018
73.9802654627711 4.0425533555438 0.463712672386492
74.0004890784621 3.2446809827391 0.415438829407517
74.0207126941532 3.56382993186098 0.435391122555825
74.0409363098443 3.6170214233813 0.438628275844795
74.0611599255353 4.14893633858443 0.469774533230711
74.0813835412264 4.0425533555438 0.463712672386492
74.1016071569175 3.45744694882036 0.428843514653201
74.1218307726085 3.93617037250317 0.457570511496874
74.1420543882996 4.0425533555438 0.463712672386492
74.1622780039907 3.51063844034067 0.432129719910892
74.1825016196817 3.72340440642192 0.445031947067723
74.2027252353728 3.77659589794223 0.448199474208799
74.2229488510638 3.72340440642192 0.445031947067723
74.2431724667549 3.88297888098286 0.454468302768581
74.263396082446 3.35106396577973 0.422194375282049
74.283619698137 3.77659589794223 0.448199474208799
74.3038433138281 3.56382993186098 0.435391122555825
74.3240669295192 4.30851081314537 0.478723423682818
74.3442905452102 3.6170214233813 0.438628275844795
74.3645141609013 4.09574484706411 0.466753443803018
74.3847377765924 4.20212783010474 0.472776317979537
74.4049613922834 2.87234054209691 0.390876038647036
74.4251850079745 3.82978738946255 0.451344772265282
74.4454086236656 3.88297888098286 0.454468302768581
74.4656322393566 3.40425545730004 0.425531932162505
74.4858558550477 4.09574484706411 0.466753443803018
74.5060794707388 3.29787247425942 0.418830223061378
74.5263030864298 3.88297888098286 0.454468302768581
74.5465267021209 3.67021291490161 0.441841712766838
74.566750317812 4.73404274530787 0.501807527388583
74.586973933503 3.40425545730004 0.425531932162505
74.6071975491941 3.19148949121879 0.412019521636212
74.6274211648852 3.67021291490161 0.441841712766838
74.6476447805762 3.51063844034067 0.432129719910892
74.6678683962673 3.03191501665785 0.401586954343472
74.6880920119584 3.67021291490161 0.441841712766838
74.7083156276494 3.19148949121879 0.412019521636212
74.7285392433405 3.77659589794223 0.448199474208799
74.7487628590316 3.82978738946255 0.451344772265282
74.7689864747226 3.56382993186098 0.435391122555825
74.7892100904137 3.2446809827391 0.415438829407517
74.8094337061048 3.67021291490161 0.441841712766838
74.8296573217958 3.56382993186098 0.435391122555825
74.8498809374869 4.25531932162505 0.475759163456095
74.870104553178 2.97872352513754 0.398048674321006
74.890328168869 3.67021291490161 0.441841712766838
74.9105517845601 3.35106396577973 0.422194375282049
74.9307754002512 3.72340440642192 0.445031947067723
74.9509990159422 3.93617037250317 0.457570511496874
74.9712226316333 3.40425545730004 0.425531932162505
74.9914462473243 3.82978738946255 0.451344772265282
75.0116698630154 3.13829799969848 0.408571598914043
75.0318934787065 3.2446809827391 0.415438829407517
75.0521170943975 3.29787247425942 0.418830223061378
75.0723407100886 3.6170214233813 0.438628275844795
75.0925643257797 3.56382993186098 0.435391122555825
75.1127879414707 3.35106396577973 0.422194375282049
75.1330115571618 3.40425545730004 0.425531932162505
75.1532351728529 3.98936186402349 0.460651829217758
75.1734587885439 3.56382993186098 0.435391122555825
75.193682404235 3.67021291490161 0.441841712766838
75.2139060199261 4.52127677922662 0.490401320821245
75.2341296356171 2.65957457601566 0.376120643554402
75.2543532513082 3.19148949121879 0.412019521636212
75.2745768669993 3.03191501665785 0.401586954343472
75.2948004826903 4.68085125378756 0.498980420230782
75.3150240983814 3.51063844034067 0.432129719910892
75.3352477140725 3.88297888098286 0.454468302768581
75.3554713297635 3.82978738946255 0.451344772265282
75.3756949454546 3.6170214233813 0.438628275844795
75.3959185611457 4.41489379618599 0.48459755047143
75.4161421768367 3.51063844034067 0.432129719910892
75.4363657925278 4.14893633858443 0.469774533230711
75.4565894082189 4.14893633858443 0.469774533230711
75.4768130239099 3.19148949121879 0.412019521636212
75.497036639601 3.93617037250317 0.457570511496874
75.5172602552921 3.13829799969848 0.408571598914043
75.5374838709831 2.71276606753597 0.37986322969976
75.5577074866742 3.77659589794223 0.448199474208799
75.5779311023653 3.2446809827391 0.415438829407517
75.5981547180563 3.98936186402349 0.460651829217758
75.6183783337474 3.13829799969848 0.408571598914043
75.6386019494385 3.6170214233813 0.438628275844795
75.6588255651295 3.98936186402349 0.460651829217758
75.6790491808206 3.13829799969848 0.408571598914043
75.6992727965117 3.13829799969848 0.408571598914043
75.7194964122027 4.0425533555438 0.463712672386492
75.7397200278938 4.30851081314537 0.478723423682818
75.7599436435848 3.35106396577973 0.422194375282049
75.7801672592759 3.03191501665785 0.401586954343472
75.800390874967 3.19148949121879 0.412019521636212
75.820614490658 3.51063844034067 0.432129719910892
75.8408381063491 3.29787247425942 0.418830223061378
75.8610617220402 3.98936186402349 0.460651829217758
75.8812853377312 3.2446809827391 0.415438829407517
75.9015089534223 2.8191490505766 0.387239903442613
75.9217325691134 2.97872352513754 0.398048674321006
75.9419561848044 3.51063844034067 0.432129719910892
75.9621798004955 3.08510650817816 0.405094330581189
75.9824034161866 3.29787247425942 0.418830223061378
76.0026270318776 3.77659589794223 0.448199474208799
76.0228506475687 3.45744694882036 0.428843514653201
76.0430742632598 3.56382993186098 0.435391122555825
76.0632978789508 3.03191501665785 0.401586954343472
76.0835214946419 2.8191490505766 0.387239903442613
76.103745110333 3.93617037250317 0.457570511496874
76.123968726024 3.56382993186098 0.435391122555825
76.1441923417151 3.67021291490161 0.441841712766838
76.1644159574062 3.67021291490161 0.441841712766838
76.1846395730972 2.92553203361722 0.394478658939308
76.2048631887883 3.35106396577973 0.422194375282049
76.2250868044794 3.35106396577973 0.422194375282049
76.2453104201704 3.56382993186098 0.435391122555825
76.2655340358615 3.35106396577973 0.422194375282049
76.2857576515526 3.03191501665785 0.401586954343472
76.3059812672436 3.03191501665785 0.401586954343472
76.3262048829347 3.19148949121879 0.412019521636212
76.3464284986258 3.08510650817816 0.405094330581189
76.3666521143168 2.97872352513754 0.398048674321006
76.3868757300079 3.19148949121879 0.412019521636212
76.407099345699 3.51063844034067 0.432129719910892
76.42732296139 2.8191490505766 0.387239903442613
76.4475465770811 3.56382993186098 0.435391122555825
76.4677701927722 3.03191501665785 0.401586954343472
76.4879938084632 2.87234054209691 0.390876038647036
76.5082174241543 3.45744694882036 0.428843514653201
76.5284410398453 3.13829799969848 0.408571598914043
76.5486646555364 3.40425545730004 0.425531932162505
76.5688882712275 3.56382993186098 0.435391122555825
76.5891118869185 3.2446809827391 0.415438829407517
76.6093355026096 2.55319159297503 0.368521463374206
76.6295591183007 3.93617037250317 0.457570511496874
76.6497827339917 3.03191501665785 0.401586954343472
76.6700063496828 3.08510650817816 0.405094330581189
76.6902299653739 3.2446809827391 0.415438829407517
76.7104535810649 3.67021291490161 0.441841712766838
76.730677196756 3.19148949121879 0.412019521636212
76.7509008124471 2.97872352513754 0.398048674321006
76.7711244281381 3.2446809827391 0.415438829407517
76.7913480438292 3.08510650817816 0.405094330581189
76.8115716595203 3.56382993186098 0.435391122555825
76.8317952752113 3.40425545730004 0.425531932162505
76.8520188909024 3.88297888098286 0.454468302768581
76.8722425065935 3.6170214233813 0.438628275844795
76.8924661222845 4.0425533555438 0.463712672386492
76.9126897379756 3.2446809827391 0.415438829407517
76.9329133536667 3.67021291490161 0.441841712766838
76.9531369693577 3.35106396577973 0.422194375282049
76.9733605850488 3.13829799969848 0.408571598914043
76.9935842007399 2.71276606753597 0.37986322969976
77.0138078164309 3.40425545730004 0.425531932162505
77.034031432122 3.19148949121879 0.412019521636212
77.0542550478131 2.97872352513754 0.398048674321006
77.0744786635041 2.8191490505766 0.387239903442613
77.0947022791952 2.65957457601566 0.376120643554402
77.1149258948863 3.67021291490161 0.441841712766838
77.1351495105773 3.08510650817816 0.405094330581189
77.1553731262684 3.13829799969848 0.408571598914043
77.1755967419595 2.97872352513754 0.398048674321006
77.1958203576505 2.8191490505766 0.387239903442613
77.2160439733416 2.76595755905628 0.383569300189794
77.2362675890327 3.45744694882036 0.428843514653201
77.2564912047237 3.45744694882036 0.428843514653201
77.2767148204148 3.40425545730004 0.425531932162505
77.2969384361058 3.77659589794223 0.448199474208799
77.3171620517969 2.8191490505766 0.387239903442613
77.337385667488 2.39361711841409 0.356819372592072
77.357609283179 3.35106396577973 0.422194375282049
77.3778328988701 2.97872352513754 0.398048674321006
77.3980565145612 3.08510650817816 0.405094330581189
77.4182801302522 2.87234054209691 0.390876038647036
77.4385037459433 3.45744694882036 0.428843514653201
77.4587273616344 3.40425545730004 0.425531932162505
77.4789509773254 3.19148949121879 0.412019521636212
77.4991745930165 2.87234054209691 0.390876038647036
77.5193982087076 3.2446809827391 0.415438829407517
77.5396218243986 3.6170214233813 0.438628275844795
77.5598454400897 2.97872352513754 0.398048674321006
77.5800690557808 3.40425545730004 0.425531932162505
77.6002926714718 3.19148949121879 0.412019521636212
77.6205162871629 2.60638308449535 0.372340440642192
77.640739902854 3.51063844034067 0.432129719910892
77.660963518545 3.13829799969848 0.408571598914043
77.6811871342361 2.87234054209691 0.390876038647036
77.7014107499272 3.08510650817816 0.405094330581189
77.7216343656182 2.92553203361722 0.394478658939308
77.7418579813093 3.19148949121879 0.412019521636212
77.7620815970004 2.55319159297503 0.368521463374206
77.7823052126914 3.08510650817816 0.405094330581189
77.8025288283825 2.71276606753597 0.37986322969976
77.8227524440736 2.71276606753597 0.37986322969976
77.8429760597646 3.88297888098286 0.454468302768581
77.8631996754557 3.82978738946255 0.451344772265282
77.8834232911468 3.13829799969848 0.408571598914043
77.9036469068378 3.98936186402349 0.460651829217758
77.9238705225289 3.56382993186098 0.435391122555825
77.94409413822 3.13829799969848 0.408571598914043
77.964317753911 2.71276606753597 0.37986322969976
77.9845413696021 2.65957457601566 0.376120643554402
78.0047649852932 2.65957457601566 0.376120643554402
78.0249886009842 3.29787247425942 0.418830223061378
78.0452122166753 2.97872352513754 0.398048674321006
78.0654358323663 3.45744694882036 0.428843514653201
78.0856594480574 2.71276606753597 0.37986322969976
78.1058830637485 3.13829799969848 0.408571598914043
78.1261066794395 3.56382993186098 0.435391122555825
78.1463302951306 3.08510650817816 0.405094330581189
78.1665539108217 2.97872352513754 0.398048674321006
78.1867775265127 3.6170214233813 0.438628275844795
78.2070011422038 2.50000010145472 0.364662493543428
78.2272247578949 3.2446809827391 0.415438829407517
78.2474483735859 3.40425545730004 0.425531932162505
78.267671989277 3.77659589794223 0.448199474208799
78.2878956049681 3.6170214233813 0.438628275844795
78.3081192206591 3.13829799969848 0.408571598914043
78.3283428363502 3.2446809827391 0.415438829407517
78.3485664520413 3.03191501665785 0.401586954343472
78.3687900677323 3.35106396577973 0.422194375282049
78.3890136834234 2.97872352513754 0.398048674321006
78.4092372991145 2.97872352513754 0.398048674321006
78.4294609148055 3.56382993186098 0.435391122555825
78.4496845304966 3.13829799969848 0.408571598914043
78.4699081461877 2.92553203361722 0.394478658939308
78.4901317618787 2.8191490505766 0.387239903442613
78.5103553775698 2.97872352513754 0.398048674321006
78.5305789932609 3.72340440642192 0.445031947067723
78.5508026089519 3.08510650817816 0.405094330581189
78.571026224643 3.51063844034067 0.432129719910892
78.5912498403341 3.35106396577973 0.422194375282049
78.6114734560251 3.6170214233813 0.438628275844795
78.6316970717162 3.6170214233813 0.438628275844795
78.6519206874073 2.34042562689378 0.352832438824499
78.6721443030983 2.60638308449535 0.372340440642192
78.6923679187894 3.40425545730004 0.425531932162505
78.7125915344805 3.2446809827391 0.415438829407517
78.7328151501715 2.92553203361722 0.394478658939308
78.7530387658626 4.20212783010474 0.472776317979537
78.7732623815537 2.92553203361722 0.394478658939308
78.7934859972447 3.2446809827391 0.415438829407517
78.8137096129358 2.8191490505766 0.387239903442613
78.8339332286268 3.2446809827391 0.415438829407517
78.8541568443179 2.87234054209691 0.390876038647036
78.874380460009 2.76595755905628 0.383569300189794
78.8946040757 2.71276606753597 0.37986322969976
78.9148276913911 2.97872352513754 0.398048674321006
78.9350513070822 3.03191501665785 0.401586954343472
78.9552749227732 2.92553203361722 0.394478658939308
78.9754985384643 2.65957457601566 0.376120643554402
78.9957221541554 3.45744694882036 0.428843514653201
79.0159457698464 3.29787247425942 0.418830223061378
79.0361693855375 3.45744694882036 0.428843514653201
79.0563930012286 3.03191501665785 0.401586954343472
79.0766166169196 3.29787247425942 0.418830223061378
79.0968402326107 2.92553203361722 0.394478658939308
79.1170638483018 2.92553203361722 0.394478658939308
79.1372874639928 3.2446809827391 0.415438829407517
79.1575110796839 2.50000010145472 0.364662493543428
79.177734695375 3.08510650817816 0.405094330581189
79.197958311066 3.35106396577973 0.422194375282049
79.2181819267571 2.65957457601566 0.376120643554402
79.2384055424482 3.03191501665785 0.401586954343472
79.2586291581392 3.2446809827391 0.415438829407517
79.2788527738303 2.60638308449535 0.372340440642192
79.2990763895214 3.03191501665785 0.401586954343472
79.3193000052124 2.92553203361722 0.394478658939308
79.3395236209035 3.35106396577973 0.422194375282049
79.3597472365946 2.60638308449535 0.372340440642192
79.3799708522856 2.8191490505766 0.387239903442613
79.4001944679767 3.08510650817816 0.405094330581189
79.4204180836678 2.76595755905628 0.383569300189794
79.4406416993588 2.8191490505766 0.387239903442613
79.4608653150499 2.71276606753597 0.37986322969976
79.481088930741 2.60638308449535 0.372340440642192
79.501312546432 2.60638308449535 0.372340440642192
79.5215361621231 2.97872352513754 0.398048674321006
79.5417597778142 3.2446809827391 0.415438829407517
79.5619833935052 3.45744694882036 0.428843514653201
79.5822070091963 3.56382993186098 0.435391122555825
79.6024306248873 3.19148949121879 0.412019521636212
79.6226542405784 3.03191501665785 0.401586954343472
79.6428778562695 2.34042562689378 0.352832438824499
79.6631014719605 3.08510650817816 0.405094330581189
79.6833250876516 3.51063844034067 0.432129719910892
79.7035487033427 3.29787247425942 0.418830223061378
79.7237723190337 2.8191490505766 0.387239903442613
79.7439959347248 2.76595755905628 0.383569300189794
79.7642195504159 3.03191501665785 0.401586954343472
79.7844431661069 3.19148949121879 0.412019521636212
79.804666781798 3.29787247425942 0.418830223061378
79.8248903974891 2.34042562689378 0.352832438824499
79.8451140131801 2.87234054209691 0.390876038647036
79.8653376288712 3.51063844034067 0.432129719910892
79.8855612445623 2.97872352513754 0.398048674321006
79.9057848602533 2.50000010145472 0.364662493543428
79.9260084759444 3.03191501665785 0.401586954343472
79.9462320916355 2.60638308449535 0.372340440642192
79.9664557073265 3.77659589794223 0.448199474208799
79.9866793230176 3.08510650817816 0.405094330581189
80.0069029387087 2.28723413537347 0.348799935660385
80.0271265543997 2.44680860993441 0.360762247785373
80.0473501700908 3.03191501665785 0.401586954343472
80.0675737857819 3.77659589794223 0.448199474208799
80.0877974014729 2.92553203361722 0.394478658939308
80.108021017164 3.35106396577973 0.422194375282049
80.1282446328551 3.03191501665785 0.401586954343472
80.1484682485461 2.60638308449535 0.372340440642192
80.1686918642372 2.71276606753597 0.37986322969976
80.1889154799283 3.2446809827391 0.415438829407517
80.2091390956193 3.45744694882036 0.428843514653201
80.2293627113104 2.87234054209691 0.390876038647036
80.2495863270015 2.39361711841409 0.356819372592072
80.2698099426925 2.97872352513754 0.398048674321006
80.2900335583836 2.76595755905628 0.383569300189794
80.3102571740747 3.19148949121879 0.412019521636212
80.3304807897657 2.60638308449535 0.372340440642192
80.3507044054568 3.2446809827391 0.415438829407517
80.3709280211478 2.92553203361722 0.394478658939308
80.3911516368389 2.87234054209691 0.390876038647036
80.41137525253 2.92553203361722 0.394478658939308
80.431598868221 3.19148949121879 0.412019521636212
80.4518224839121 3.19148949121879 0.412019521636212
80.4720460996032 2.71276606753597 0.37986322969976
80.4922697152942 3.2446809827391 0.415438829407517
80.5124933309853 2.97872352513754 0.398048674321006
80.5327169466764 3.35106396577973 0.422194375282049
80.5529405623674 3.03191501665785 0.401586954343472
80.5731641780585 3.03191501665785 0.401586954343472
80.5933877937496 2.60638308449535 0.372340440642192
80.6136114094406 2.55319159297503 0.368521463374206
80.6338350251317 2.92553203361722 0.394478658939308
80.6540586408228 3.82978738946255 0.451344772265282
80.6742822565138 2.87234054209691 0.390876038647036
80.6945058722049 3.2446809827391 0.415438829407517
80.714729487896 2.71276606753597 0.37986322969976
80.734953103587 3.08510650817816 0.405094330581189
80.7551767192781 2.87234054209691 0.390876038647036
80.7754003349692 3.35106396577973 0.422194375282049
80.7956239506602 2.50000010145472 0.364662493543428
80.8158475663513 2.60638308449535 0.372340440642192
80.8360711820424 3.35106396577973 0.422194375282049
80.8562947977334 2.55319159297503 0.368521463374206
80.8765184134245 2.76595755905628 0.383569300189794
80.8967420291156 2.92553203361722 0.394478658939308
80.9169656448066 3.19148949121879 0.412019521636212
80.9371892604977 2.76595755905628 0.383569300189794
80.9574128761888 2.97872352513754 0.398048674321006
80.9776364918798 2.12765966081253 0.336412530691444
80.9978601075709 2.8191490505766 0.387239903442613
81.018083723262 2.60638308449535 0.372340440642192
81.038307338953 2.71276606753597 0.37986322969976
81.0585309546441 2.92553203361722 0.394478658939308
81.0787545703352 2.65957457601566 0.376120643554402
81.0989781860262 2.34042562689378 0.352832438824499
81.1192018017173 2.65957457601566 0.376120643554402
81.1394254174083 3.08510650817816 0.405094330581189
81.1596490330994 3.40425545730004 0.425531932162505
81.1798726487905 2.71276606753597 0.37986322969976
81.2000962644815 2.92553203361722 0.394478658939308
81.2203198801726 2.92553203361722 0.394478658939308
81.2405434958637 2.12765966081253 0.336412530691444
81.2607671115547 3.08510650817816 0.405094330581189
81.2809907272458 2.87234054209691 0.390876038647036
81.3012143429369 3.03191501665785 0.401586954343472
81.3214379586279 2.97872352513754 0.398048674321006
81.341661574319 2.55319159297503 0.368521463374206
81.3618851900101 3.03191501665785 0.401586954343472
81.3821088057011 3.45744694882036 0.428843514653201
81.4023324213922 3.35106396577973 0.422194375282049
81.4225560370833 2.92553203361722 0.394478658939308
81.4427796527743 2.87234054209691 0.390876038647036
81.4630032684654 3.13829799969848 0.408571598914043
81.4832268841565 3.03191501665785 0.401586954343472
81.5034504998475 2.97872352513754 0.398048674321006
81.5236741155386 2.50000010145472 0.364662493543428
81.5438977312297 2.97872352513754 0.398048674321006
81.5641213469207 3.03191501665785 0.401586954343472
81.5843449626118 2.87234054209691 0.390876038647036
81.6045685783029 2.76595755905628 0.383569300189794
81.6247921939939 3.35106396577973 0.422194375282049
81.645015809685 3.72340440642192 0.445031947067723
81.6652394253761 3.08510650817816 0.405094330581189
81.6854630410671 3.03191501665785 0.401586954343472
81.7056866567582 3.2446809827391 0.415438829407517
81.7259102724493 2.44680860993441 0.360762247785373
81.7461338881403 2.76595755905628 0.383569300189794
81.7663575038314 3.29787247425942 0.418830223061378
81.7865811195225 2.55319159297503 0.368521463374206
81.8068047352135 2.50000010145472 0.364662493543428
81.8270283509046 3.13829799969848 0.408571598914043
81.8472519665957 2.65957457601566 0.376120643554402
81.8674755822867 2.97872352513754 0.398048674321006
81.8876991979778 2.76595755905628 0.383569300189794
81.9079228136688 2.76595755905628 0.383569300189794
81.9281464293599 3.13829799969848 0.408571598914043
81.948370045051 3.03191501665785 0.401586954343472
81.968593660742 2.60638308449535 0.372340440642192
81.9888172764331 2.92553203361722 0.394478658939308
82.0090408921242 2.65957457601566 0.376120643554402
82.0292645078152 3.29787247425942 0.418830223061378
82.0494881235063 2.71276606753597 0.37986322969976
82.0697117391974 2.87234054209691 0.390876038647036
82.0899353548884 3.19148949121879 0.412019521636212
82.1101589705795 2.65957457601566 0.376120643554402
82.1303825862706 2.18085115233284 0.340591728578921
82.1506062019616 3.2446809827391 0.415438829407517
82.1708298176527 2.55319159297503 0.368521463374206
82.1910534333438 3.13829799969848 0.408571598914043
82.2112770490348 2.28723413537347 0.348799935660385
82.2315006647259 3.19148949121879 0.412019521636212
82.251724280417 2.44680860993441 0.360762247785373
82.271947896108 2.97872352513754 0.398048674321006
82.2921715117991 2.55319159297503 0.368521463374206
82.3123951274902 3.2446809827391 0.415438829407517
82.3326187431812 2.60638308449535 0.372340440642192
82.3528423588723 2.65957457601566 0.376120643554402
82.3730659745634 2.60638308449535 0.372340440642192
82.3932895902544 2.50000010145472 0.364662493543428
82.4135132059455 2.8191490505766 0.387239903442613
82.4337368216366 2.76595755905628 0.383569300189794
82.4539604373276 2.65957457601566 0.376120643554402
82.4741840530187 2.65957457601566 0.376120643554402
82.4944076687098 2.12765966081253 0.336412530691444
82.5146312844008 2.76595755905628 0.383569300189794
82.5348549000919 2.23404264385315 0.34472026390471
82.555078515783 2.44680860993441 0.360762247785373
82.575302131474 3.03191501665785 0.401586954343472
82.5955257471651 2.39361711841409 0.356819372592072
82.6157493628562 2.28723413537347 0.348799935660385
82.6359729785472 2.55319159297503 0.368521463374206
82.6561965942383 2.55319159297503 0.368521463374206
82.6764202099293 2.44680860993441 0.360762247785373
82.6966438256204 2.44680860993441 0.360762247785373
82.7168674413115 2.44680860993441 0.360762247785373
82.7370910570025 2.44680860993441 0.360762247785373
82.7573146726936 3.19148949121879 0.412019521636212
82.7775382883847 2.65957457601566 0.376120643554402
82.7977619040757 2.44680860993441 0.360762247785373
82.8179855197668 2.39361711841409 0.356819372592072
82.8382091354579 2.55319159297503 0.368521463374206
82.8584327511489 2.87234054209691 0.390876038647036
82.87865636684 2.92553203361722 0.394478658939308
82.8988799825311 3.29787247425942 0.418830223061378
82.9191035982221 2.60638308449535 0.372340440642192
82.9393272139132 2.97872352513754 0.398048674321006
82.9595508296043 2.18085115233284 0.340591728578921
82.9797744452953 2.65957457601566 0.376120643554402
82.9999980609864 2.76595755905628 0.383569300189794
83.0202216766775 2.92553203361722 0.394478658939308
83.0404452923685 2.8191490505766 0.387239903442613
83.0606689080596 2.55319159297503 0.368521463374206
83.0808925237507 2.71276606753597 0.37986322969976
83.1011161394417 2.39361711841409 0.356819372592072
83.1213397551328 2.50000010145472 0.364662493543428
83.1415633708239 2.92553203361722 0.394478658939308
83.1617869865149 2.23404264385315 0.34472026390471
83.182010602206 2.8191490505766 0.387239903442613
83.2022342178971 2.50000010145472 0.364662493543428
83.2224578335881 2.76595755905628 0.383569300189794
83.2426814492792 2.55319159297503 0.368521463374206
83.2629050649703 3.56382993186098 0.435391122555825
83.2831286806613 2.34042562689378 0.352832438824499
83.3033522963524 2.76595755905628 0.383569300189794
83.3235759120435 2.8191490505766 0.387239903442613
83.3437995277345 2.28723413537347 0.348799935660385
83.3640231434256 2.65957457601566 0.376120643554402
83.3842467591167 2.76595755905628 0.383569300189794
83.4044703748077 2.55319159297503 0.368521463374206
83.4246939904988 2.87234054209691 0.390876038647036
83.4449176061898 2.60638308449535 0.372340440642192
83.4651412218809 2.39361711841409 0.356819372592072
83.485364837572 2.23404264385315 0.34472026390471
83.505588453263 2.12765966081253 0.336412530691444
83.5258120689541 2.39361711841409 0.356819372592072
83.5460356846452 2.34042562689378 0.352832438824499
83.5662593003362 2.07446816929221 0.332180758076181
83.5864829160273 2.76595755905628 0.383569300189794
83.6067065317184 2.50000010145472 0.364662493543428
83.6269301474094 2.50000010145472 0.364662493543428
83.6471537631005 2.50000010145472 0.364662493543428
83.6673773787916 2.65957457601566 0.376120643554402
83.6876009944826 3.08510650817816 0.405094330581189
83.7078246101737 2.71276606753597 0.37986322969976
83.7280482258648 2.55319159297503 0.368521463374206
83.7482718415558 2.28723413537347 0.348799935660385
83.7684954572469 2.28723413537347 0.348799935660385
83.788719072938 3.40425545730004 0.425531932162505
83.808942688629 2.44680860993441 0.360762247785373
83.8291663043201 2.34042562689378 0.352832438824499
83.8493899200112 2.71276606753597 0.37986322969976
83.8696135357022 3.2446809827391 0.415438829407517
83.8898371513933 2.60638308449535 0.372340440642192
83.9100607670844 2.44680860993441 0.360762247785373
83.9302843827754 3.03191501665785 0.401586954343472
83.9505079984665 3.19148949121879 0.412019521636212
83.9707316141576 2.44680860993441 0.360762247785373
83.9909552298486 2.07446816929221 0.332180758076181
84.0111788455397 2.50000010145472 0.364662493543428
84.0314024612308 2.44680860993441 0.360762247785373
84.0516260769218 2.55319159297503 0.368521463374206
84.0718496926129 2.65957457601566 0.376120643554402
84.092073308304 2.8191490505766 0.387239903442613
84.112296923995 2.18085115233284 0.340591728578921
84.1325205396861 2.71276606753597 0.37986322969976
84.1527441553772 1.91489369473127 0.319148949121879
84.1729677710682 2.50000010145472 0.364662493543428
84.1931913867593 2.44680860993441 0.360762247785373
84.2134150024503 2.44680860993441 0.360762247785373
84.2336386181414 2.50000010145472 0.364662493543428
84.2538622338325 2.44680860993441 0.360762247785373
84.2740858495235 2.97872352513754 0.398048674321006
84.2943094652146 2.55319159297503 0.368521463374206
84.3145330809057 2.23404264385315 0.34472026390471
84.3347566965967 2.71276606753597 0.37986322969976
84.3549803122878 2.65957457601566 0.376120643554402
84.3752039279789 2.97872352513754 0.398048674321006
84.3954275436699 2.18085115233284 0.340591728578921
84.415651159361 2.50000010145472 0.364662493543428
84.4358747750521 2.39361711841409 0.356819372592072
84.4560983907431 2.39361711841409 0.356819372592072
84.4763220064342 3.08510650817816 0.405094330581189
84.4965456221253 2.71276606753597 0.37986322969976
84.5167692378163 2.34042562689378 0.352832438824499
84.5369928535074 2.44680860993441 0.360762247785373
84.5572164691985 2.28723413537347 0.348799935660385
84.5774400848895 2.34042562689378 0.352832438824499
84.5976637005806 2.39361711841409 0.356819372592072
84.6178873162717 2.55319159297503 0.368521463374206
84.6381109319627 2.39361711841409 0.356819372592072
84.6583345476538 2.23404264385315 0.34472026390471
84.6785581633449 2.23404264385315 0.34472026390471
84.6987817790359 2.87234054209691 0.390876038647036
84.719005394727 2.28723413537347 0.348799935660385
84.7392290104181 2.50000010145472 0.364662493543428
84.7594526261091 2.39361711841409 0.356819372592072
84.7796762418002 2.87234054209691 0.390876038647036
84.7998998574913 2.39361711841409 0.356819372592072
84.8201234731823 2.60638308449535 0.372340440642192
84.8403470888734 1.96808518625159 0.323551211550436
84.8605707045645 2.97872352513754 0.398048674321006
84.8807943202555 2.60638308449535 0.372340440642192
84.9010179359466 2.23404264385315 0.34472026390471
84.9212415516377 2.71276606753597 0.37986322969976
84.9414651673287 2.28723413537347 0.348799935660385
84.9616887830198 2.76595755905628 0.383569300189794
84.9819123987108 2.23404264385315 0.34472026390471
85.0021360144019 2.23404264385315 0.34472026390471
85.022359630093 2.12765966081253 0.336412530691444
85.042583245784 2.87234054209691 0.390876038647036
85.0628068614751 3.40425545730004 0.425531932162505
85.0830304771662 2.44680860993441 0.360762247785373
85.1032540928572 2.12765966081253 0.336412530691444
85.1234777085483 2.12765966081253 0.336412530691444
85.1437013242394 2.65957457601566 0.376120643554402
85.1639249399304 2.44680860993441 0.360762247785373
85.1841485556215 2.50000010145472 0.364662493543428
85.2043721713126 2.44680860993441 0.360762247785373
85.2245957870036 2.07446816929221 0.332180758076181
85.2448194026947 2.28723413537347 0.348799935660385
85.2650430183858 2.39361711841409 0.356819372592072
85.2852666340768 2.76595755905628 0.383569300189794
85.3054902497679 2.34042562689378 0.352832438824499
85.325713865459 2.39361711841409 0.356819372592072
85.34593748115 2.76595755905628 0.383569300189794
85.3661610968411 1.80851071169065 0.310157028270018
85.3863847125322 2.55319159297503 0.368521463374206
85.4066083282232 1.96808518625159 0.323551211550436
85.4268319439143 2.0212766777719 0.327894375166624
85.4470555596054 2.65957457601566 0.376120643554402
85.4672791752964 2.39361711841409 0.356819372592072
85.4875027909875 2.50000010145472 0.364662493543428
85.5077264066786 2.23404264385315 0.34472026390471
85.5279500223696 2.55319159297503 0.368521463374206
85.5481736380607 2.39361711841409 0.356819372592072
85.5683972537518 2.87234054209691 0.390876038647036
85.5886208694428 2.76595755905628 0.383569300189794
85.6088444851339 2.39361711841409 0.356819372592072
85.629068100825 2.34042562689378 0.352832438824499
85.649291716516 2.60638308449535 0.372340440642192
85.6695153322071 2.23404264385315 0.34472026390471
85.6897389478981 2.71276606753597 0.37986322969976
85.7099625635892 2.0212766777719 0.327894375166624
85.7301861792803 2.39361711841409 0.356819372592072
85.7504097949713 1.91489369473127 0.319148949121879
85.7706334106624 2.71276606753597 0.37986322969976
85.7908570263535 2.23404264385315 0.34472026390471
85.8110806420445 2.28723413537347 0.348799935660385
85.8313042577356 2.44680860993441 0.360762247785373
85.8515278734267 2.60638308449535 0.372340440642192
85.8717514891177 2.87234054209691 0.390876038647036
85.8919751048088 2.18085115233284 0.340591728578921
85.9121987204999 2.8191490505766 0.387239903442613
85.9324223361909 2.87234054209691 0.390876038647036
85.952645951882 2.55319159297503 0.368521463374206
85.9728695675731 3.08510650817816 0.405094330581189
85.9930931832641 2.12765966081253 0.336412530691444
86.0133167989552 2.92553203361722 0.394478658939308
86.0335404146463 1.70212772865002 0.300896514843521
86.0537640303373 3.03191501665785 0.401586954343472
86.0739876460284 2.55319159297503 0.368521463374206
86.0942112617195 2.0212766777719 0.327894375166624
86.1144348774105 2.18085115233284 0.340591728578921
86.1346584931016 2.60638308449535 0.372340440642192
86.1548821087927 2.60638308449535 0.372340440642192
86.1751057244837 2.28723413537347 0.348799935660385
86.1953293401748 2.0212766777719 0.327894375166624
86.2155529558659 2.23404264385315 0.34472026390471
86.2357765715569 2.07446816929221 0.332180758076181
86.256000187248 2.55319159297503 0.368521463374206
86.2762238029391 2.34042562689378 0.352832438824499
86.2964474186301 2.34042562689378 0.352832438824499
86.3166710343212 2.12765966081253 0.336412530691444
86.3368946500123 2.71276606753597 0.37986322969976
86.3571182657033 2.65957457601566 0.376120643554402
86.3773418813944 2.60638308449535 0.372340440642192
86.3975654970855 2.28723413537347 0.348799935660385
86.4177891127765 2.50000010145472 0.364662493543428
86.4380127284676 2.12765966081253 0.336412530691444
86.4582363441586 2.23404264385315 0.34472026390471
86.4784599598497 2.92553203361722 0.394478658939308
86.4986835755408 2.39361711841409 0.356819372592072
86.5189071912318 2.60638308449535 0.372340440642192
86.5391308069229 2.0212766777719 0.327894375166624
86.559354422614 2.44680860993441 0.360762247785373
86.579578038305 2.23404264385315 0.34472026390471
86.5998016539961 2.28723413537347 0.348799935660385
86.6200252696872 1.96808518625159 0.323551211550436
86.6402488853782 2.23404264385315 0.34472026390471
86.6604725010693 2.23404264385315 0.34472026390471
86.6806961167604 2.07446816929221 0.332180758076181
86.7009197324514 2.12765966081253 0.336412530691444
86.7211433481425 2.23404264385315 0.34472026390471
86.7413669638336 2.23404264385315 0.34472026390471
86.7615905795246 2.55319159297503 0.368521463374206
86.7818141952157 2.39361711841409 0.356819372592072
86.8020378109068 2.28723413537347 0.348799935660385
86.8222614265978 2.44680860993441 0.360762247785373
86.8424850422889 2.60638308449535 0.372340440642192
86.86270865798 2.76595755905628 0.383569300189794
86.882932273671 2.39361711841409 0.356819372592072
86.9031558893621 2.28723413537347 0.348799935660385
86.9233795050532 1.96808518625159 0.323551211550436
86.9436031207442 2.28723413537347 0.348799935660385
86.9638267364353 2.34042562689378 0.352832438824499
86.9840503521264 2.12765966081253 0.336412530691444
87.0042739678174 2.34042562689378 0.352832438824499
87.0244975835085 2.18085115233284 0.340591728578921
87.0447211991996 2.55319159297503 0.368521463374206
87.0649448148906 2.34042562689378 0.352832438824499
87.0851684305817 2.97872352513754 0.398048674321006
87.1053920462728 1.96808518625159 0.323551211550436
87.1256156619638 2.44680860993441 0.360762247785373
87.1458392776549 1.96808518625159 0.323551211550436
87.166062893346 2.0212766777719 0.327894375166624
87.186286509037 2.07446816929221 0.332180758076181
87.2065101247281 2.55319159297503 0.368521463374206
87.2267337404191 2.07446816929221 0.332180758076181
87.2469573561102 2.28723413537347 0.348799935660385
87.2671809718013 2.39361711841409 0.356819372592072
87.2874045874923 1.75531922017033 0.305561855301235
87.3076282031834 2.76595755905628 0.383569300189794
87.3278518188745 2.12765966081253 0.336412530691444
87.3480754345655 1.91489369473127 0.319148949121879
87.3682990502566 2.0212766777719 0.327894375166624
87.3885226659477 2.44680860993441 0.360762247785373
87.4087462816387 2.07446816929221 0.332180758076181
87.4289698973298 2.50000010145472 0.364662493543428
87.4491935130209 1.86170220321096 0.314685107616239
87.4694171287119 1.80851071169065 0.310157028270018
87.489640744403 1.75531922017033 0.305561855301235
87.5098643600941 2.07446816929221 0.332180758076181
87.5300879757851 2.97872352513754 0.398048674321006
87.5503115914762 2.44680860993441 0.360762247785373
87.5705352071673 1.96808518625159 0.323551211550436
87.5907588228583 2.39361711841409 0.356819372592072
87.6109824385494 2.44680860993441 0.360762247785373
87.6312060542405 2.12765966081253 0.336412530691444
87.6514296699315 2.39361711841409 0.356819372592072
87.6716532856226 1.75531922017033 0.305561855301235
87.6918769013137 2.65957457601566 0.376120643554402
87.7121005170047 2.28723413537347 0.348799935660385
87.7323241326958 2.39361711841409 0.356819372592072
87.7525477483869 2.65957457601566 0.376120643554402
87.7727713640779 1.70212772865002 0.300896514843521
87.792994979769 2.18085115233284 0.340591728578921
87.8132185954601 2.39361711841409 0.356819372592072
87.8334422111511 2.50000010145472 0.364662493543428
87.8536658268422 2.18085115233284 0.340591728578921
87.8738894425333 2.23404264385315 0.34472026390471
87.8941130582243 2.18085115233284 0.340591728578921
87.9143366739154 2.07446816929221 0.332180758076181
87.9345602896065 2.28723413537347 0.348799935660385
87.9547839052975 1.91489369473127 0.319148949121879
87.9750075209886 2.23404264385315 0.34472026390471
87.9952311366796 2.28723413537347 0.348799935660385
88.0154547523707 2.0212766777719 0.327894375166624
88.0356783680618 1.96808518625159 0.323551211550436
88.0559019837528 1.80851071169065 0.310157028270018
88.0761255994439 1.59574474560939 0.291341797730203
88.096349215135 2.23404264385315 0.34472026390471
88.116572830826 2.0212766777719 0.327894375166624
88.1367964465171 1.86170220321096 0.314685107616239
88.1570200622082 1.70212772865002 0.300896514843521
88.1772436778992 1.75531922017033 0.305561855301235
88.1974672935903 2.18085115233284 0.340591728578921
88.2176909092814 2.39361711841409 0.356819372592072
88.2379145249724 2.18085115233284 0.340591728578921
88.2581381406635 2.34042562689378 0.352832438824499
88.2783617563546 2.12765966081253 0.336412530691444
88.2985853720456 2.23404264385315 0.34472026390471
88.3188089877367 2.44680860993441 0.360762247785373
88.3390326034278 2.07446816929221 0.332180758076181
88.3592562191188 2.23404264385315 0.34472026390471
88.3794798348099 2.0212766777719 0.327894375166624
88.399703450501 2.12765966081253 0.336412530691444
88.419927066192 2.44680860993441 0.360762247785373
88.4401506818831 1.96808518625159 0.323551211550436
88.4603742975742 2.28723413537347 0.348799935660385
88.4805979132652 2.44680860993441 0.360762247785373
88.5008215289563 2.65957457601566 0.376120643554402
88.5210451446474 2.34042562689378 0.352832438824499
88.5412687603384 2.44680860993441 0.360762247785373
88.5614923760295 2.34042562689378 0.352832438824499
88.5817159917206 1.91489369473127 0.319148949121879
88.6019396074116 1.91489369473127 0.319148949121879
88.6221632231027 2.60638308449535 0.372340440642192
88.6423868387938 1.80851071169065 0.310157028270018
88.6626104544848 1.91489369473127 0.319148949121879
88.6828340701759 1.96808518625159 0.323551211550436
88.703057685867 2.0212766777719 0.327894375166624
88.723281301558 1.96808518625159 0.323551211550436
88.7435049172491 2.34042562689378 0.352832438824499
88.7637285329401 1.91489369473127 0.319148949121879
88.7839521486312 2.44680860993441 0.360762247785373
88.8041757643223 2.50000010145472 0.364662493543428
88.8243993800133 1.80851071169065 0.310157028270018
88.8446229957044 1.70212772865002 0.300896514843521
88.8648466113955 2.55319159297503 0.368521463374206
88.8850702270865 2.23404264385315 0.34472026390471
88.9052938427776 2.50000010145472 0.364662493543428
88.9255174584687 2.0212766777719 0.327894375166624
88.9457410741597 2.28723413537347 0.348799935660385
88.9659646898508 1.80851071169065 0.310157028270018
88.9861883055419 2.0212766777719 0.327894375166624
89.0064119212329 1.64893623712971 0.296157690892575
89.026635536924 2.0212766777719 0.327894375166624
89.0468591526151 1.48936176256877 0.281462916854699
89.0670827683061 1.59574474560939 0.291341797730203
89.0873063839972 2.55319159297503 0.368521463374206
89.1075299996883 2.34042562689378 0.352832438824499
89.1277536153793 2.0212766777719 0.327894375166624
89.1479772310704 1.80851071169065 0.310157028270018
89.1682008467615 2.0212766777719 0.327894375166624
89.1884244624525 2.23404264385315 0.34472026390471
89.2086480781436 2.12765966081253 0.336412530691444
89.2288716938347 1.80851071169065 0.310157028270018
89.2490953095257 1.80851071169065 0.310157028270018
89.2693189252168 2.28723413537347 0.348799935660385
89.2895425409079 2.18085115233284 0.340591728578921
89.3097661565989 1.54255325408908 0.286444948174184
89.32998977229 2.65957457601566 0.376120643554402
89.3502133879811 2.34042562689378 0.352832438824499
89.3704370036721 2.55319159297503 0.368521463374206
89.3906606193632 1.91489369473127 0.319148949121879
89.4108842350543 2.18085115233284 0.340591728578921
89.4311078507453 2.55319159297503 0.368521463374206
89.4513314664364 2.18085115233284 0.340591728578921
89.4715550821275 2.50000010145472 0.364662493543428
89.4917786978185 2.76595755905628 0.383569300189794
89.5120023135096 1.64893623712971 0.296157690892575
89.5322259292006 1.86170220321096 0.314685107616239
89.5524495448917 2.12765966081253 0.336412530691444
89.5726731605828 2.34042562689378 0.352832438824499
89.5928967762738 2.50000010145472 0.364662493543428
89.6131203919649 2.28723413537347 0.348799935660385
89.633344007656 2.23404264385315 0.34472026390471
89.653567623347 2.55319159297503 0.368521463374206
89.6737912390381 1.80851071169065 0.310157028270018
89.6940148547292 2.23404264385315 0.34472026390471
89.7142384704202 2.07446816929221 0.332180758076181
89.7344620861113 1.70212772865002 0.300896514843521
89.7546857018024 2.18085115233284 0.340591728578921
89.7749093174934 1.86170220321096 0.314685107616239
89.7951329331845 1.32978728800783 0.265957457601566
89.8153565488756 1.86170220321096 0.314685107616239
89.8355801645666 1.64893623712971 0.296157690892575
89.8558037802577 1.59574474560939 0.291341797730203
89.8760273959488 1.86170220321096 0.314685107616239
89.8962510116398 2.71276606753597 0.37986322969976
89.9164746273309 2.07446816929221 0.332180758076181
89.936698243022 2.0212766777719 0.327894375166624
89.956921858713 1.91489369473127 0.319148949121879
89.9771454744041 2.07446816929221 0.332180758076181
89.9973690900952 1.59574474560939 0.291341797730203
